# Supplementary material for: Identification of host transcriptional networks showing concentration-dependent regulation by HPV16 E6 and E7 proteins in basal cervical squamous epithelial cells
Source: PubMed Central journal article supplement (PMC4960560; doi:10.1038/srep29832), 2016-07-26
Supplement: srep29832-s1.pdf [file srep29832-s1.pdf]

## **Supplementary Material**

### **Identification of host transcriptional networks showing concentration-dependent regulation by**

### **HPV16 E6 and E7 proteins in basal cervical squamous epithelial cells**

Stephen P Smith<sup>1</sup>, Cinzia G Scarpini<sup>2</sup>, Ian J Groves<sup>2</sup>, Richard I Odle<sup>2</sup> and Nicholas Coleman<sup>1,2</sup>

1. Cambridge University Hospitals, Addenbrooke's Hospital, Cambridge, CB2 2QQ, UK

2. Department of Pathology, University of Cambridge, CB2 1QP, UK

## **Legends to Supplementary Figures and Tables.**

### **Supplementary Figure S1. Signalling pathway impact analysis (SPIA) evidence plots.**

Each dot represents a pathway in the Kyoto Encyclopedia of Genes and Genomes (KEGG) database. The y-axis shows the degree of perturbation and the x-axis the enrichment score in the gene input list (genes associated with HPV16 E6 protein in panel A; genes associated with HPV16 E7 protein in panel B). Both axes plot  $-\log_{10}$  values. For pathways above the blue line,  $p < 0.05$  for both parameters; while for pathways above the red line,  $p < 0.01$  for both parameters.

### **Supplementary Figure S2. HPV16 E6 and E7-associated genes in the Kyoto Encyclopedia of Genes and Genomes cancer pathways.**

The red boxes show HPV16 E6-associated (A) and HPV16 E7-associated (B) genes that are present in the KEGG cancer pathways.

### **Supplementary Figure S3. Correlations between levels of HPV16 oncoproteins and downstream effectors of the master regulators.**

The heat maps show expression levels of each gene in the regulons of the master regulators (rows), plotted against levels of their associated virus protein (columns), arranged from lowest (left) to highest (right). Each column is derived from a single W12 clone. As each clone was analysed in triplicate, there are three columns for each level of E6 or E7 expression. Data for HPV16 E6 are in panel A, while data for HPV16 E7 are in panel B.

### **Supplementary Figure S4. Networks derived following inclusion or exclusion of known p53 target genes.**

(A) Network derived from genes that were both E6- and p53-associated. (B) Network derived from genes that were E6-associated but not p53-associated.

**Supplementary Figure S5. The transcriptional regulatory network in W12 cells inferred from gene expression changes following depletion of HPV16 early genes (sample set 2).**

**Supplementary Figure S6. Overlap between data from sample sets 1 and 2.**

Venn diagram showing the numbers of genes correlated with HPV16 E6 or E7 protein levels in sample set 1 (top left and top right sets, respectively), as well as those for which expression was significantly altered following HPV16 early gene depletion using siRNA in sample set 2 (bottom set).

**Supplementary Figure S7. Data validation for the master regulator PA2G4 and the downstream effector gene ATL3.**

(A) Correlations between gene expression levels determined by microarray (x-axis) and qRT-PCR (y-axis). (B) Representative Western blot used to quantify relative levels of PA2G4 and ATL3 proteins. All data were referenced to levels of the respective protein in the independent W12 clone E3. (C) Correlations between gene expression levels determined by qRT-PCR (x-axis) and those determined by quantitative western blotting (y-axis).

**Supplementary Figure S8. Depletion of PA2G4.**

Levels of PA2G4 mRNA following treatment of cervical high-grade SIL (W12 clone B) or SCC (CaSki and SiHa) cells with PA2G4 siRNAs or non-targetting control siRNAs. Expression levels were determined by qRT-PCR and referenced to those in NTC-treated cells. (B) Representative Western blot used to quantify relative levels of PA2G4 protein following treatment of cells treated with siPA2G4 or siNTC over seven days. (C) Quantification of relative PA2G4 protein levels. All data were referenced to PA2G4 protein levels in the independent W12 clone E3.

**Supplementary Table S1. Genes showing significant concentration-dependent associations with levels of HPV16 E6 protein in the W12 clones.** In the Table, the columns show the following: A, Illumina probe identifier; B, log fold change across the sample sets; C average expression levels across the sample sets; D, t-statistic. E, p-value for association with virus protein level; F, adjusted p-value; G, B-statistic. There are 1,213 genes showing significant concentration-dependent associations with HPV16 E6.

**Supplementary Table S2. Genes showing significant concentration-dependent associations with levels of HPV16 E7 protein in the W12 clones.** In the Table, the columns show the following: A, Illumina probe identifier; B, log fold change across the sample sets; C average expression levels across the sample sets; D, t-statistic. E, p-value for association with virus protein level; F, adjusted p-value; G, B-statistic. There are 1,527 genes showing significant concentration-dependent associations with HPV16 E7.

**Supplementary Table S3. Genes showing significant concentration-dependent associations with levels of HPV16 E6 protein in the W12 clones, after exclusion of known p53 targets.** In the Table, the columns show the following: A, Illumina probe identifier; B, log fold change across the sample sets; C average expression levels across the sample sets; D, t-statistic. E, p-value for association with virus protein level; F, adjusted p-value; G, B-statistic. There are 1,069 genes showing significant concentration-dependent associations with HPV16 E6 after exclusion of known p53 targets.

**Supplementary Table S4. Genes showing significant concentration-dependent associations with levels of HPV16 E7 protein in the W12 clones, after exclusion of known p53 targets.** In the Table, the columns show the following: A, Illumina probe identifier; B, log fold change across the sample sets; C average expression levels across the sample sets; D, t-statistic. E, p-value for association with virus protein level; F, adjusted p-value; G, B-statistic. There are 1,379 genes showing significant concentration-dependent associations with HPV16 E7 after exclusion of known p53 targets.



**Supplementary Table S5. List of genes that were significantly differentially expressed following HPV16 early gene depletion in W12 cells.** The list of 5,535 genes was derived from sample set 2. In the Table, the columns show the following: A, Illumina probe identifier; B, gene symbol; C, evidence of association with levels of HPV16 E6 protein in the W12 clones (sample set 1) (true or false); D, evidence of association with levels of HPV16 E7 protein in the W12 clones (sample set 1) (true or false). In total, 937 of the 5,535 genes derived from sample set 2 (16.9%) also showed a concentration dependent relationship with E7 and/or E6 protein in the W12 clones.

**Supplementary Table S6. Primers and conditions used for qRT-PCR.**

**Supplementary Table S7. Antibodies used for western blotting.**

A

SPIA two-way evidence plot

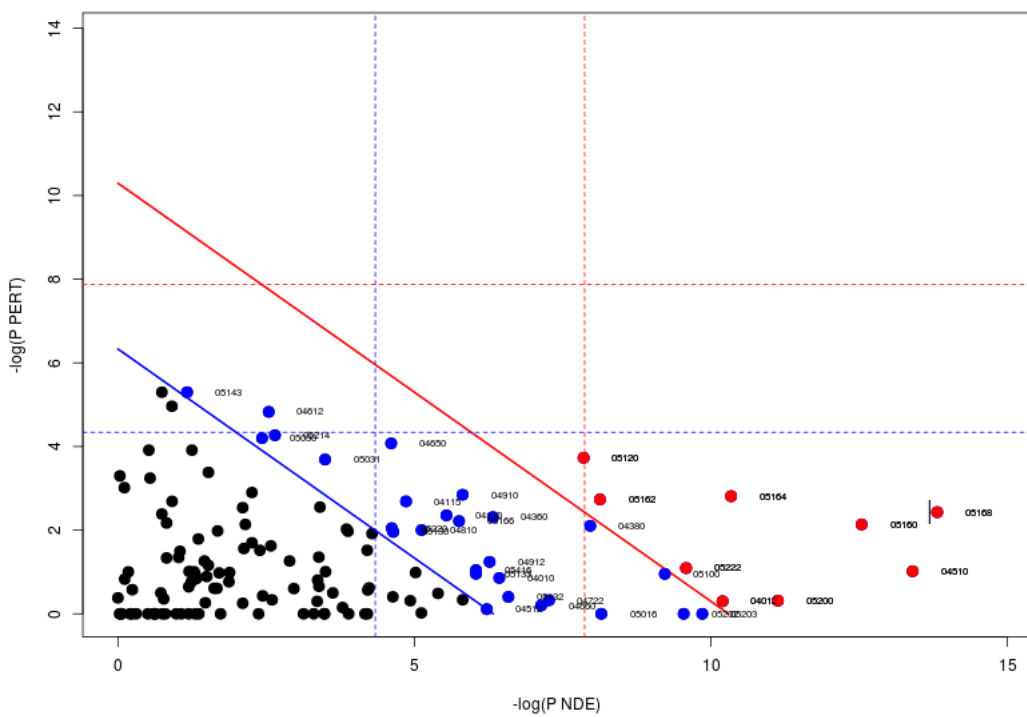

B

SPIA two-way evidence plot

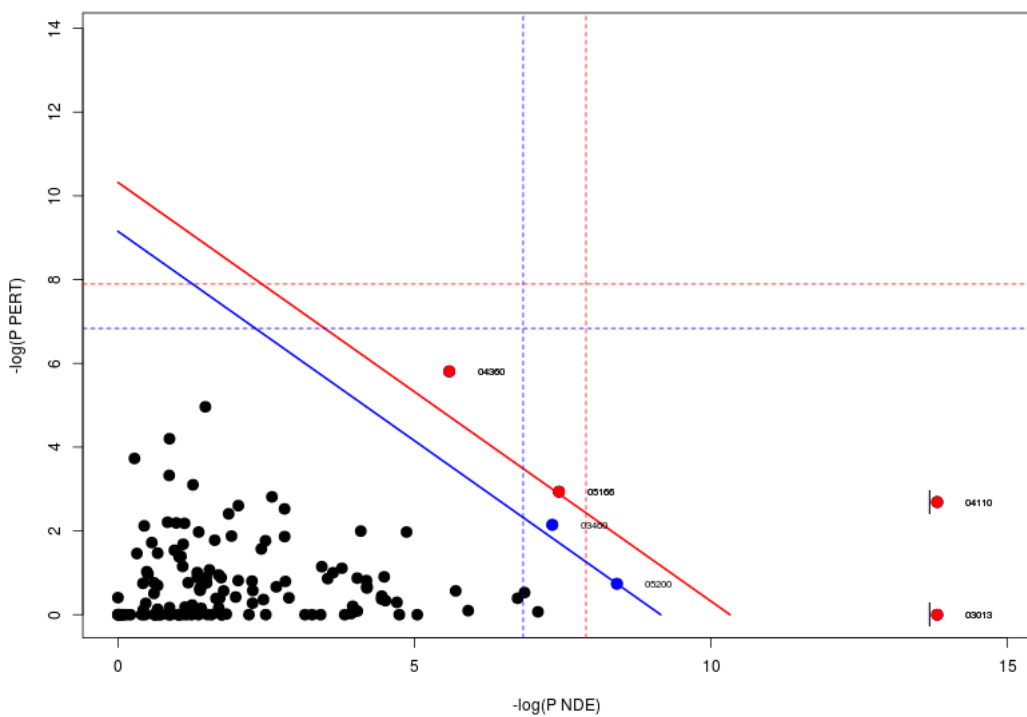



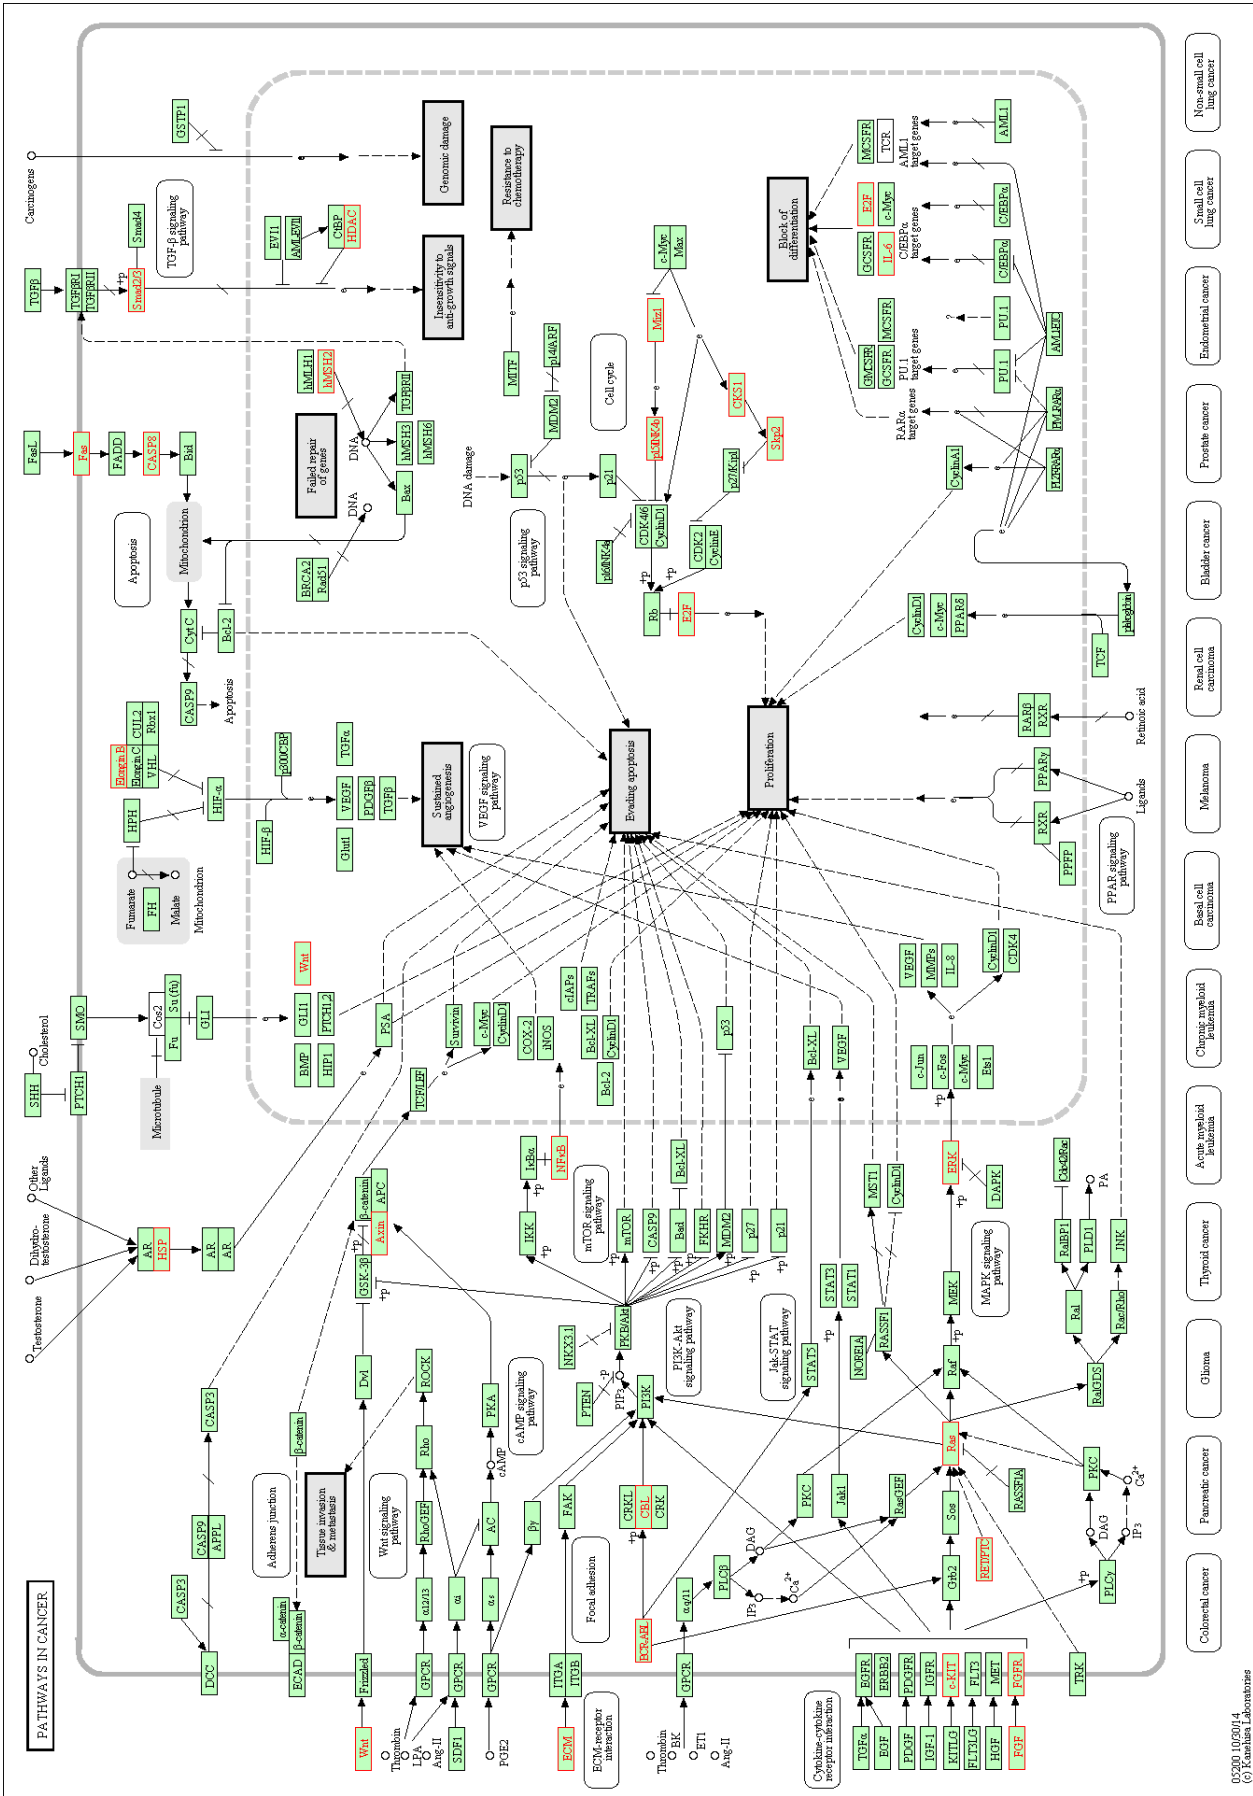

A

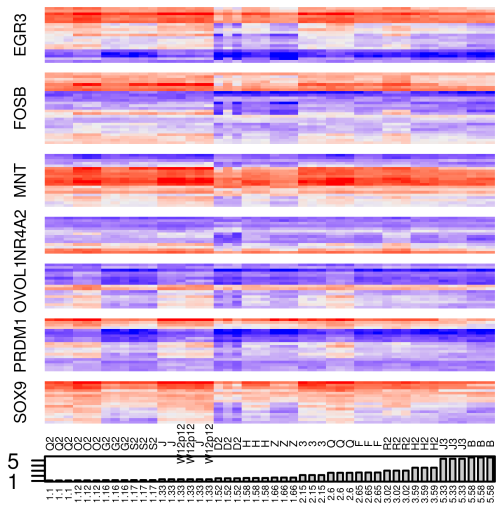

B

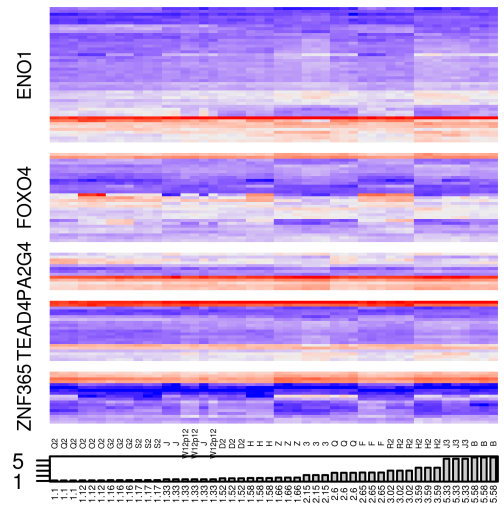

A

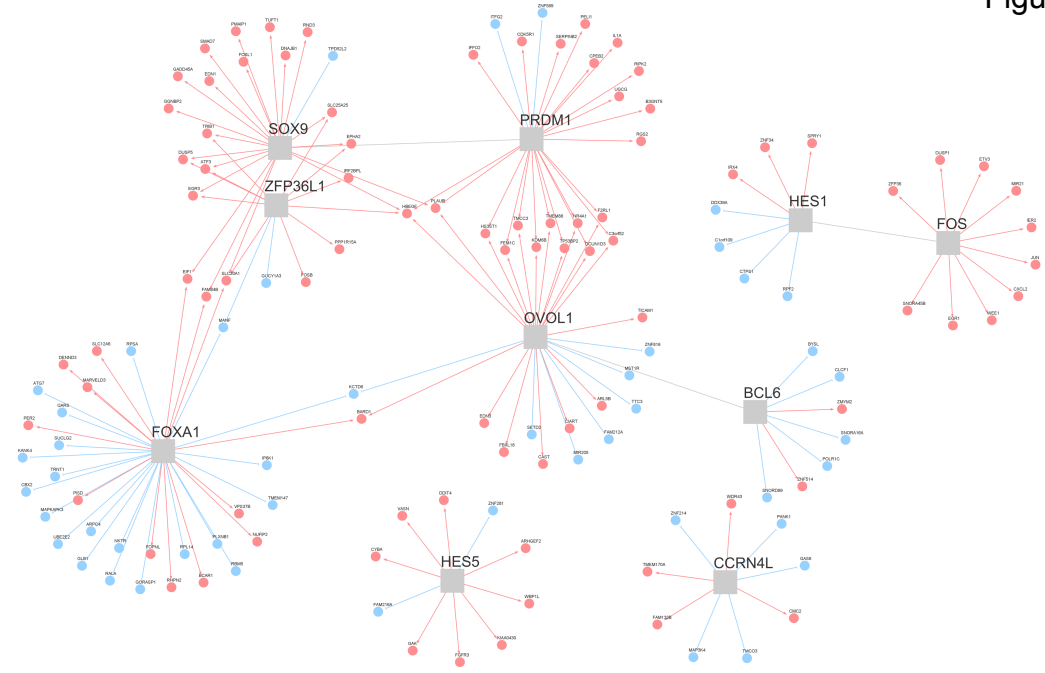

B

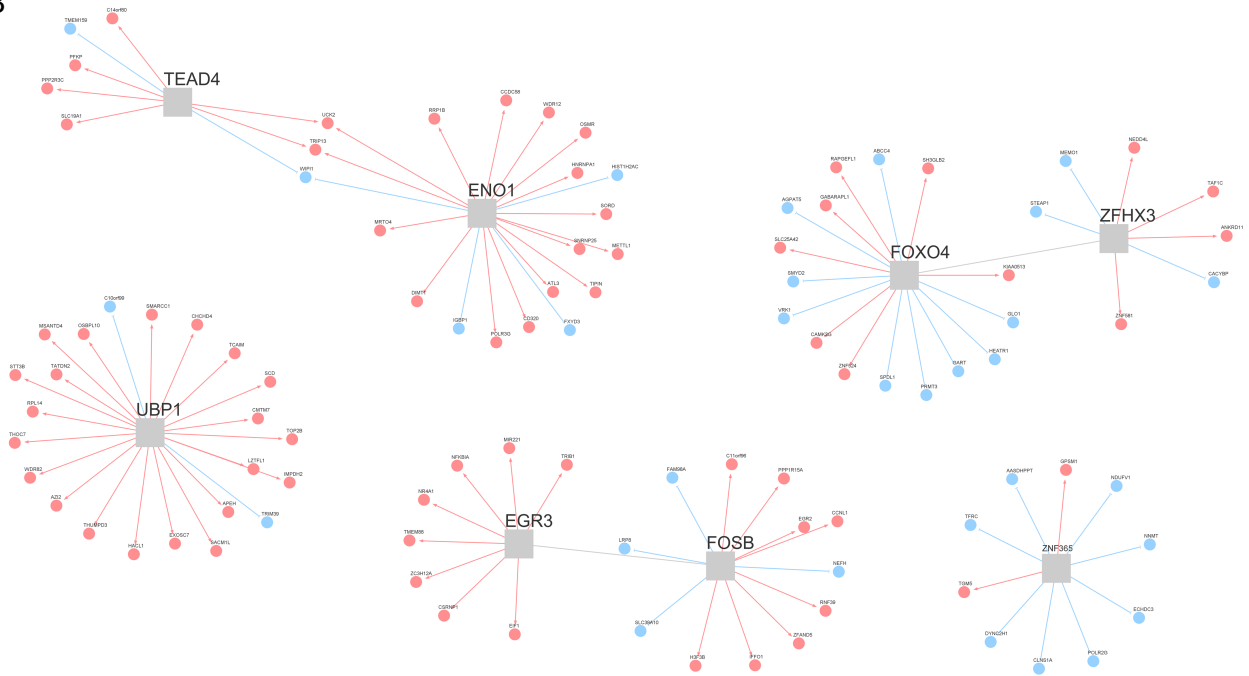





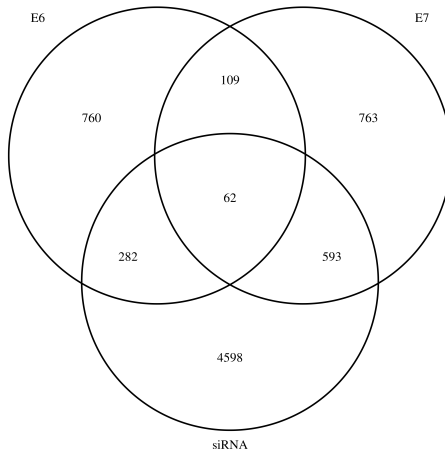



A

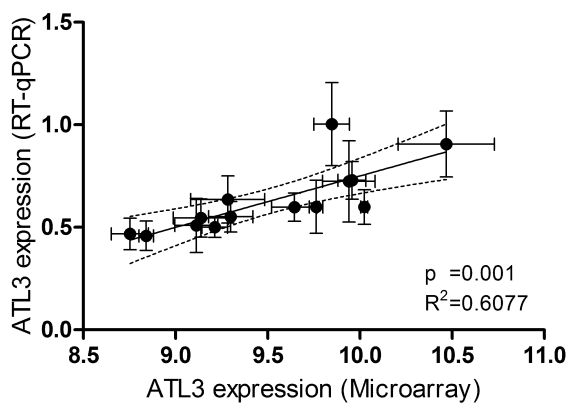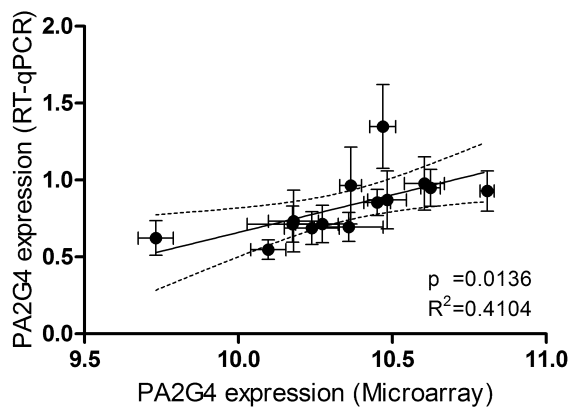

B

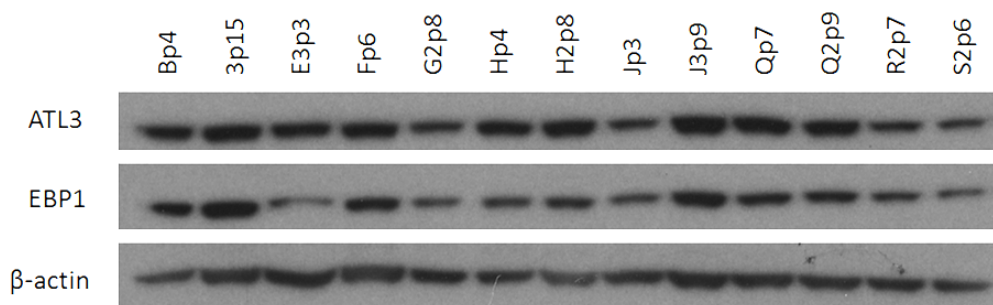

C

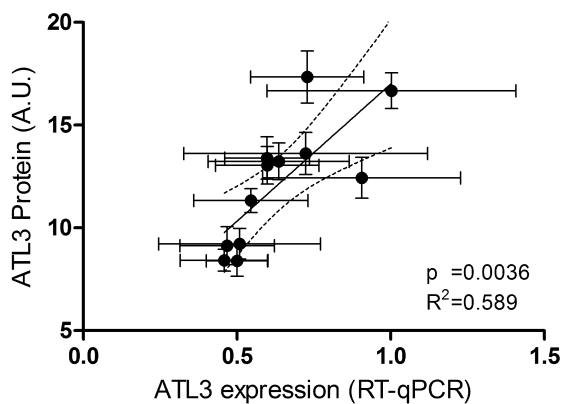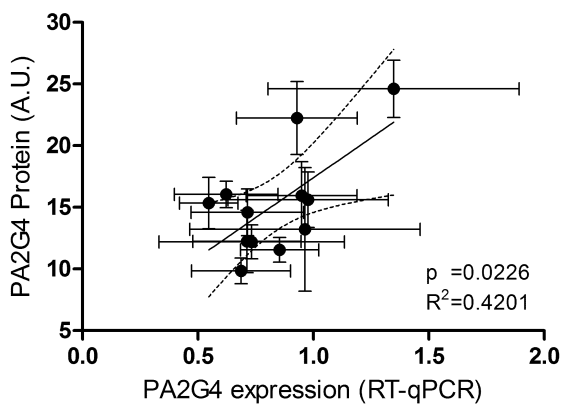

A

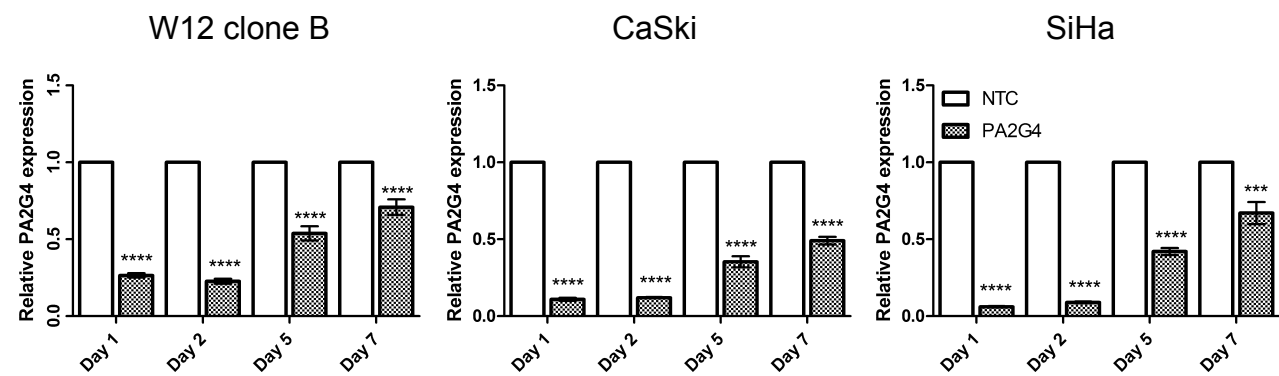

B

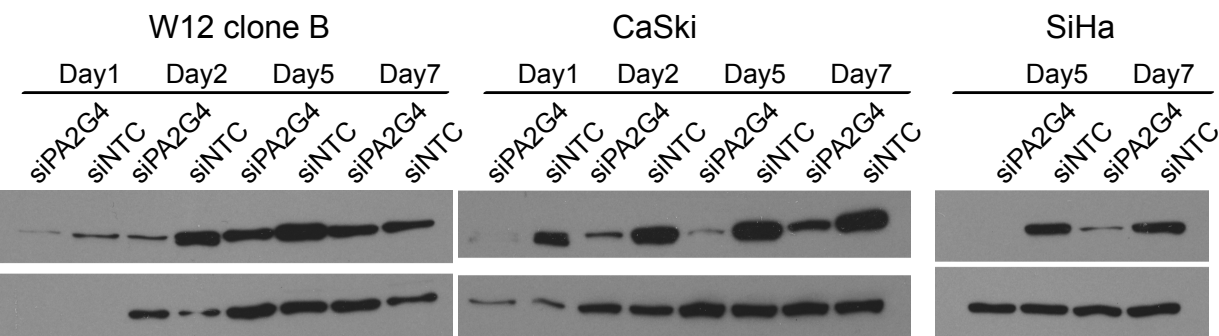

C

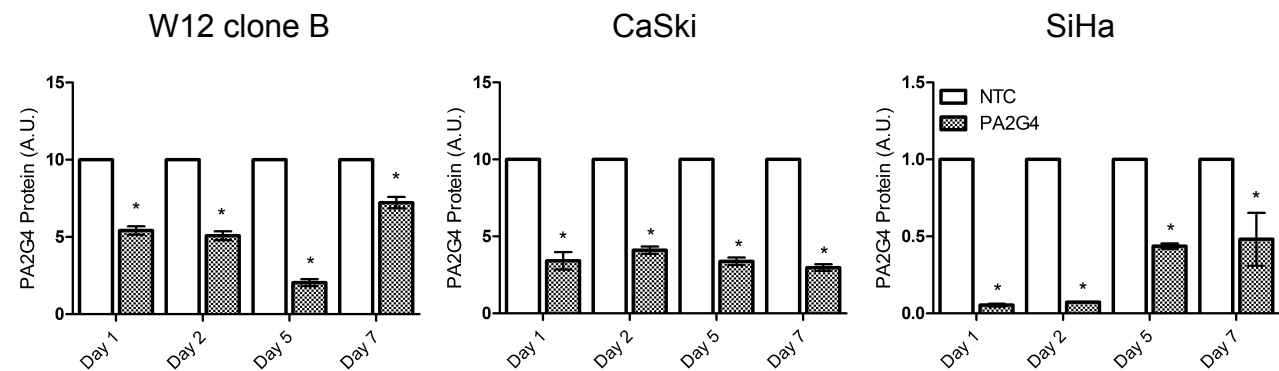

**Supplementary Table S1. Genes showing significant concentration-dependent associations with levels of HPV16 E6 protein in the W12 clones.**

|              | logFC    | AveExpr  | t        | P.Value  | adj.P.Val | B        |
|--------------|----------|----------|----------|----------|-----------|----------|
| ILMN_1768176 | -1.03382 | 9.695149 | -8.95765 | 5.63E-12 | 1.94E-07  | 16.72703 |
| ILMN_2115125 | -0.94747 | 10.6213  | -5.82064 | 4.14E-07 | 0.000188  | 6.323643 |
| ILMN_1762899 | -0.87966 | 11.10572 | -6.27406 | 8.15E-08 | 6.25E-05  | 7.840583 |
| ILMN_1718387 | 0.807518 | 7.067937 | 4.841749 | 1.28E-05 | 0.001949  | 3.122794 |
| ILMN_1743199 | -0.73382 | 8.006812 | -5.5079  | 1.26E-06 | 0.000411  | 5.286692 |
| ILMN_2096372 | 0.704396 | 6.843431 | 5.770864 | 4.94E-07 | 0.000216  | 6.157963 |
| ILMN_1751607 | -0.69388 | 8.653658 | -4.02154 | 0.000195 | 0.012565  | 0.596512 |
| ILMN_1693192 | 0.668337 | 10.53244 | 3.590024 | 0.000752 | 0.030491  | -0.6419  |
| ILMN_2188264 | -0.63646 | 9.77076  | -5.06548 | 5.91E-06 | 0.001252  | 3.841039 |
| ILMN_1795930 | -0.60207 | 8.793098 | -4.89311 | 1.07E-05 | 0.001805  | 3.286776 |
| ILMN_1693338 | 0.59907  | 8.093769 | 4.561861 | 3.30E-05 | 0.003717  | 2.239748 |
| ILMN_1656501 | -0.58408 | 10.91612 | -4.63926 | 2.54E-05 | 0.003133  | 2.482046 |
| ILMN_1709348 | 0.573429 | 6.659982 | 6.073941 | 1.67E-07 | 0.000101  | 7.16964  |
| ILMN_1801307 | -0.56904 | 7.782393 | -6.39114 | 5.35E-08 | 4.99E-05  | 8.233819 |
| ILMN_1682775 | -0.55521 | 9.613886 | -6.35117 | 6.18E-08 | 5.32E-05  | 8.099527 |
| ILMN_1705750 | 0.547466 | 9.719861 | 4.659485 | 2.38E-05 | 0.003001  | 2.545607 |
| ILMN_2374865 | -0.54036 | 8.426554 | -4.89263 | 1.07E-05 | 0.001805  | 3.28525  |
| ILMN_1687768 | -0.51624 | 10.72609 | -4.09663 | 0.000153 | 0.010842  | 0.819255 |
| ILMN_2121408 | -0.51066 | 8.642341 | -4.06981 | 0.000167 | 0.01144   | 0.739487 |
| ILMN_1682717 | -0.50735 | 10.41325 | -7.48282 | 1.05E-09 | 6.22E-06  | 11.89755 |
| ILMN_2067656 | -0.5027  | 11.18529 | -3.69888 | 0.000538 | 0.02452   | -0.33665 |
| ILMN_1796316 | 0.50097  | 6.699623 | 3.60312  | 0.000722 | 0.029718  | -0.60545 |
| ILMN_1725338 | -0.48667 | 7.689723 | -5.26734 | 2.93E-06 | 0.000776  | 4.496938 |
| ILMN_2166457 | -0.47841 | 7.79733  | -4.92266 | 9.68E-06 | 0.001702  | 3.381389 |
| ILMN_1810835 | -0.47277 | 11.7065  | -3.40852 | 0.001298 | 0.042085  | -1.13906 |
| ILMN_1718977 | -0.47091 | 8.552016 | -6.83648 | 1.07E-08 | 1.95E-05  | 9.73125  |
| ILMN_1722781 | -0.46471 | 7.165493 | -4.85394 | 1.23E-05 | 0.00192   | 3.16166  |
| ILMN_1744604 | 0.45631  | 7.452409 | 3.464024 | 0.0011   | 0.037789  | -0.98865 |
| ILMN_1737406 | -0.45431 | 10.1444  | -6.67892 | 1.90E-08 | 2.84E-05  | 9.201421 |
| ILMN_2098446 | -0.44875 | 9.193866 | -4.69937 | 2.08E-05 | 0.002763  | 2.671261 |
| ILMN_1655077 | -0.44437 | 8.529047 | -3.93805 | 0.000254 | 0.015076  | 0.351213 |
| ILMN_1759513 | -0.44274 | 10.91744 | -5.0875  | 5.48E-06 | 0.001202  | 3.912239 |
| ILMN_1702691 | -0.43746 | 8.552129 | -3.84523 | 0.000341 | 0.018239  | 0.081581 |
| ILMN_3310326 | -0.43645 | 8.573468 | -6.20962 | 1.03E-07 | 7.38E-05  | 7.624351 |
| ILMN_1682636 | -0.41617 | 7.259545 | -4.82506 | 1.35E-05 | 0.00201   | 3.069632 |
| ILMN_1734276 | 0.416054 | 8.66952  | 6.681001 | 1.88E-08 | 2.84E-05  | 9.208426 |
| ILMN_1803811 | -0.41345 | 10.1098  | -4.89073 | 1.08E-05 | 0.001808  | 3.279161 |
| ILMN_1791726 | 0.412745 | 7.649643 | 4.950285 | 8.80E-06 | 0.001614  | 3.469978 |
| ILMN_1756417 | -0.41226 | 8.04264  | -6.432   | 4.62E-08 | 4.55E-05  | 8.371157 |
| ILMN_1730223 | -0.40347 | 8.039239 | -5.23925 | 3.23E-06 | 0.000815  | 4.40528  |
| ILMN_2404688 | -0.40191 | 7.339713 | -5.61461 | 8.60E-07 | 0.000323  | 5.639362 |
| ILMN_2150851 | -0.39394 | 11.4861  | -3.98027 | 0.000222 | 0.013772  | 0.474933 |
| ILMN_2372082 | -0.39154 | 6.926074 | -4.68676 | 2.17E-05 | 0.002838  | 2.631475 |
| ILMN_1791728 | -0.3885  | 8.964567 | -3.79311 | 0.000402 | 0.020087  | -0.06838 |
| ILMN_2401873 | -0.38456 | 8.387228 | -7.0614  | 4.78E-09 | 1.50E-05  | 10.48682 |
| ILMN_2407389 | -0.384   | 8.461271 | -3.79291 | 0.000402 | 0.020087  | -0.06896 |
| ILMN_1789400 | 0.375427 | 7.093376 | 4.051956 | 0.000177 | 0.011939  | 0.6865   |
| ILMN_2197365 | -0.37526 | 11.64348 | -3.9879  | 0.000217 | 0.013562  | 0.497356 |
| ILMN_1687978 | -0.3748  | 9.9823   | -4.05453 | 0.000175 | 0.011904  | 0.694121 |
| ILMN_1810560 | -0.37449 | 6.721196 | -5.96641 | 2.46E-07 | 0.000126  | 6.809959 |

|              |          |          |          |          |          |          |
|--------------|----------|----------|----------|----------|----------|----------|
| ILMN_1692056 | 0.374319 | 7.887779 | 3.323063 | 0.00167  | 0.048443 | -1.36774 |
| ILMN_1671891 | 0.372118 | 7.065516 | 6.178178 | 1.15E-07 | 8.09E-05 | 7.518901 |
| ILMN_3236367 | -0.36952 | 9.576271 | -4.43486 | 5.05E-05 | 0.004975 | 1.845619 |
| ILMN_1801205 | -0.36816 | 9.373757 | -3.36587 | 0.001472 | 0.044915 | -1.25363 |
| ILMN_2091375 | -0.36729 | 7.420736 | -6.09985 | 1.52E-07 | 9.55E-05 | 7.256412 |
| ILMN_2150856 | -0.36279 | 12.20645 | -4.226   | 0.000101 | 0.008103 | 1.207578 |
| ILMN_1703123 | -0.36254 | 9.308187 | -4.86858 | 1.17E-05 | 0.001878 | 3.208387 |
| ILMN_2348268 | -0.36098 | 7.610188 | -4.39821 | 5.70E-05 | 0.005463 | 1.732707 |
| ILMN_1728677 | -0.35577 | 6.90659  | -4.31564 | 7.50E-05 | 0.006573 | 1.479802 |
| ILMN_1815023 | -0.35031 | 9.555022 | -6.59904 | 2.53E-08 | 3.23E-05 | 8.93277  |
| ILMN_2401878 | -0.34689 | 8.20921  | -7.28301 | 2.15E-09 | 8.24E-06 | 11.22969 |
| ILMN_1717706 | -0.3424  | 8.759393 | -4.72462 | 1.91E-05 | 0.002638 | 2.750992 |
| ILMN_2255133 | -0.34159 | 7.332635 | -3.91723 | 0.000272 | 0.015534 | 0.290434 |
| ILMN_1660000 | -0.34137 | 7.522968 | -5.25443 | 3.06E-06 | 0.000792 | 4.454812 |
| ILMN_1781285 | -0.34061 | 10.96082 | -4.56122 | 3.31E-05 | 0.003717 | 2.237736 |
| ILMN_1685663 | 0.340197 | 5.625189 | 6.886444 | 8.98E-09 | 1.76E-05 | 9.899184 |
| ILMN_1772910 | 0.337649 | 8.398031 | 5.237567 | 3.25E-06 | 0.000815 | 4.399786 |
| ILMN_1735014 | -0.33475 | 11.25498 | -5.38421 | 1.94E-06 | 0.000582 | 4.879647 |
| ILMN_2410826 | -0.33279 | 7.822715 | -3.70087 | 0.000535 | 0.024402 | -0.33102 |
| ILMN_2318643 | -0.33244 | 9.45439  | -5.55689 | 1.06E-06 | 0.000368 | 5.448442 |
| ILMN_2062701 | 0.331769 | 7.849424 | 5.899252 | 3.12E-07 | 0.00015  | 6.585714 |
| ILMN_1781400 | 0.325712 | 6.351035 | 4.663803 | 2.34E-05 | 0.002972 | 2.559191 |
| ILMN_1770612 | -0.32517 | 10.70086 | -4.47832 | 4.37E-05 | 0.004538 | 1.979976 |
| ILMN_1736670 | -0.32481 | 9.506501 | -3.82372 | 0.000365 | 0.019051 | 0.01957  |
| ILMN_2041190 | -0.3207  | 10.1174  | -6.13422 | 1.35E-07 | 9.11E-05 | 7.371555 |
| ILMN_1745620 | -0.32063 | 8.115913 | -5.10287 | 5.19E-06 | 0.001155 | 3.962017 |
| ILMN_2410145 | -0.31926 | 6.066737 | -3.90337 | 0.000284 | 0.015977 | 0.250072 |
| ILMN_1782305 | -0.3176  | 7.577045 | -3.58188 | 0.000771 | 0.031037 | -0.66453 |
| ILMN_1665510 | -0.31718 | 11.87829 | -5.21583 | 3.50E-06 | 0.000863 | 4.328925 |
| ILMN_1680139 | -0.31587 | 8.145183 | -4.52179 | 3.78E-05 | 0.004096 | 2.114932 |
| ILMN_2318638 | -0.31557 | 10.52254 | -5.0145  | 7.05E-06 | 0.001405 | 3.676507 |
| ILMN_1670841 | 0.313602 | 8.521877 | 6.700949 | 1.75E-08 | 2.84E-05 | 9.275515 |
| ILMN_1771841 | -0.31279 | 7.982244 | -3.96966 | 0.00023  | 0.01406  | 0.443777 |
| ILMN_1664922 | 0.310727 | 10.29266 | 4.153402 | 0.000127 | 0.009448 | 0.988979 |
| ILMN_1760990 | 0.310301 | 6.710187 | 4.838381 | 1.29E-05 | 0.001963 | 3.11206  |
| ILMN_1672295 | -0.30925 | 8.098478 | -4.56162 | 3.31E-05 | 0.003717 | 2.238984 |
| ILMN_1669046 | -0.30916 | 10.18236 | -4.91511 | 9.93E-06 | 0.00173  | 3.357196 |
| ILMN_1702127 | 0.30797  | 5.68991  | 6.32169  | 6.87E-08 | 5.64E-05 | 8.000517 |
| ILMN_1800317 | 0.306635 | 6.100468 | 4.539929 | 3.56E-05 | 0.003963 | 2.171373 |
| ILMN_1769201 | -0.30486 | 7.974047 | -3.60744 | 0.000713 | 0.02954  | -0.59341 |
| ILMN_1660067 | -0.30206 | 7.137712 | -4.27108 | 8.68E-05 | 0.007193 | 1.34415  |
| ILMN_2203950 | -0.30157 | 11.32692 | -7.38567 | 1.49E-09 | 7.32E-06 | 11.57312 |
| ILMN_1778401 | -0.30125 | 7.738824 | -3.57479 | 0.000787 | 0.031452 | -0.68421 |
| ILMN_1752899 | -0.30078 | 7.611663 | -4.66345 | 2.34E-05 | 0.002972 | 2.558078 |
| ILMN_1806023 | -0.29735 | 10.0989  | -3.5611  | 0.000821 | 0.032122 | -0.72215 |
| ILMN_1695590 | -0.29641 | 9.956428 | -7.03107 | 5.33E-09 | 1.53E-05 | 10.38502 |
| ILMN_2094776 | -0.29494 | 8.956537 | -4.36015 | 6.47E-05 | 0.005918 | 1.615886 |
| ILMN_1700978 | -0.29442 | 6.835207 | -4.38882 | 5.89E-05 | 0.005605 | 1.703833 |
| ILMN_1699354 | -0.29011 | 8.363614 | -4.34815 | 6.73E-05 | 0.006091 | 1.57914  |
| ILMN_1735045 | 0.28999  | 7.475736 | 3.945307 | 0.000249 | 0.014858 | 0.372428 |
| ILMN_2309156 | 0.289719 | 7.857143 | 5.52225  | 1.19E-06 | 0.000403 | 5.334043 |
| ILMN_1680814 | -0.28691 | 8.194471 | -3.50523 | 0.000972 | 0.035267 | -0.87604 |
| ILMN_1693341 | -0.28327 | 7.031799 | -4.70825 | 2.01E-05 | 0.002728 | 2.699274 |
| ILMN_1750062 | 0.282182 | 6.425835 | 3.937477 | 0.000255 | 0.015076 | 0.349533 |

|              |          |          |          |          |          |          |
|--------------|----------|----------|----------|----------|----------|----------|
| ILMN_2404746 | -0.28108 | 7.008499 | -5.04043 | 6.45E-06 | 0.00133  | 3.760124 |
| ILMN_2396020 | -0.27892 | 10.40616 | -3.37148 | 0.001448 | 0.044612 | -1.23861 |
| ILMN_2241124 | -0.27586 | 7.144788 | -3.6033  | 0.000722 | 0.029718 | -0.60495 |
| ILMN_1769520 | -0.27388 | 8.983307 | -3.53169 | 0.000897 | 0.03384  | -0.80333 |
| ILMN_1683475 | 0.273863 | 10.1368  | 6.880086 | 9.18E-09 | 1.76E-05 | 9.877815 |
| ILMN_2148469 | 0.273003 | 8.810091 | 4.903693 | 1.03E-05 | 0.001773 | 3.32064  |
| ILMN_1680132 | 0.271115 | 6.11318  | 4.746584 | 1.77E-05 | 0.002488 | 2.820471 |
| ILMN_1802205 | -0.27019 | 9.479563 | -4.63939 | 2.54E-05 | 0.003133 | 2.482441 |
| ILMN_1656057 | -0.26939 | 10.21881 | -6.06561 | 1.72E-07 | 0.000102 | 7.14174  |
| ILMN_1710495 | -0.269   | 7.138977 | -3.96284 | 0.000235 | 0.014201 | 0.42378  |
| ILMN_1683129 | -0.26888 | 8.083049 | -4.57886 | 3.12E-05 | 0.003609 | 2.292819 |
| ILMN_1734929 | -0.26869 | 9.387229 | -4.28463 | 8.30E-05 | 0.006963 | 1.385333 |
| ILMN_2327947 | -0.26672 | 6.516779 | -4.68176 | 2.20E-05 | 0.002867 | 2.615739 |
| ILMN_1721218 | -0.26379 | 13.55456 | -5.03088 | 6.66E-06 | 0.001345 | 3.729314 |
| ILMN_1740466 | -0.26359 | 8.466511 | -3.6012  | 0.000727 | 0.029821 | -0.61081 |
| ILMN_1798826 | 0.263082 | 7.326562 | 5.572684 | 9.98E-07 | 0.000355 | 5.50065  |
| ILMN_2307025 | 0.262328 | 7.798741 | 5.889069 | 3.24E-07 | 0.000151 | 6.551741 |
| ILMN_1675640 | -0.26063 | 7.865586 | -3.61071 | 0.000706 | 0.029332 | -0.58429 |
| ILMN_1776936 | 0.259812 | 6.817782 | 3.38528  | 0.00139  | 0.043808 | -1.20161 |
| ILMN_1778360 | 0.259386 | 10.85475 | 4.363111 | 6.41E-05 | 0.005894 | 1.624952 |
| ILMN_1814215 | 0.258621 | 7.380656 | 3.748624 | 0.000461 | 0.022006 | -0.19548 |
| ILMN_1756469 | -0.25781 | 6.617041 | -4.71178 | 1.99E-05 | 0.002726 | 2.710435 |
| ILMN_1741159 | -0.25759 | 6.520576 | -4.63418 | 2.59E-05 | 0.003165 | 2.466102 |
| ILMN_1672094 | 0.25669  | 6.754803 | 5.644283 | 7.75E-07 | 0.0003   | 5.737665 |
| ILMN_2108735 | 0.256349 | 6.308979 | 3.902732 | 0.000285 | 0.015983 | 0.24822  |
| ILMN_1708934 | -0.25553 | 11.66936 | -3.83767 | 0.000349 | 0.018505 | 0.059764 |
| ILMN_2117171 | -0.25546 | 10.7705  | -6.36585 | 5.86E-08 | 5.32E-05 | 8.148862 |
| ILMN_1765860 | -0.25538 | 6.948261 | -4.13747 | 0.000134 | 0.009865 | 0.941244 |
| ILMN_1794595 | -0.25387 | 7.065567 | -5.19469 | 3.77E-06 | 0.000903 | 4.260095 |
| ILMN_1652580 | 0.253064 | 7.794553 | 8.102251 | 1.15E-10 | 1.32E-06 | 13.95083 |
| ILMN_1769839 | 0.25285  | 5.604133 | 6.128481 | 1.38E-07 | 9.11E-05 | 7.352318 |
| ILMN_1707350 | 0.251547 | 7.336674 | 4.707798 | 2.02E-05 | 0.002728 | 2.697848 |
| ILMN_1778561 | -0.25082 | 9.533894 | -4.57055 | 3.21E-05 | 0.003674 | 2.266872 |
| ILMN_2339955 | -0.25069 | 7.058355 | -3.59767 | 0.000734 | 0.030072 | -0.62061 |
| ILMN_1703180 | -0.25033 | 7.621498 | -3.922   | 0.000268 | 0.015534 | 0.304351 |
| ILMN_1703891 | -0.24998 | 8.40525  | -7.06577 | 4.70E-09 | 1.50E-05 | 10.50148 |
| ILMN_1767365 | -0.24925 | 7.134126 | -5.31627 | 2.46E-06 | 0.000708 | 4.656915 |
| ILMN_1745471 | -0.24804 | 9.161866 | -3.3681  | 0.001462 | 0.044858 | -1.24766 |
| ILMN_1708130 | -0.24728 | 8.245502 | -5.02869 | 6.71E-06 | 0.001346 | 3.722271 |
| ILMN_2189668 | -0.24719 | 7.489654 | -3.68932 | 0.000555 | 0.024798 | -0.36367 |
| ILMN_1716988 | -0.24717 | 8.836059 | -3.36154 | 0.001491 | 0.045292 | -1.26521 |
| ILMN_1671895 | 0.245309 | 6.998514 | 6.332541 | 6.61E-08 | 5.56E-05 | 8.036961 |
| ILMN_3268403 | 0.244386 | 5.923422 | 8.654311 | 1.63E-11 | 2.81E-07 | 15.75172 |
| ILMN_2086077 | -0.2431  | 8.675336 | -3.43538 | 0.001198 | 0.039828 | -1.06647 |
| ILMN_2326712 | -0.24246 | 7.108977 | -4.47627 | 4.40E-05 | 0.004541 | 1.973628 |
| ILMN_1797236 | 0.241859 | 6.569355 | 4.725654 | 1.90E-05 | 0.002638 | 2.754254 |
| ILMN_1742166 | 0.240845 | 8.381935 | 5.346771 | 2.21E-06 | 0.000652 | 4.756829 |
| ILMN_1669888 | -0.23976 | 9.58316  | -4.08131 | 0.000161 | 0.011128 | 0.773665 |
| ILMN_2413158 | 0.239509 | 6.450866 | 3.452644 | 0.001138 | 0.038458 | -1.01961 |
| ILMN_1716446 | -0.23767 | 7.655153 | -4.80927 | 1.43E-05 | 0.002095 | 3.019381 |
| ILMN_1694075 | -0.23588 | 9.968446 | -3.66899 | 0.00059  | 0.025993 | -0.42097 |
| ILMN_1675616 | -0.23565 | 6.875555 | -3.89156 | 0.000295 | 0.016344 | 0.215735 |
| ILMN_2130411 | 0.233589 | 9.58704  | 4.65257  | 2.43E-05 | 0.003061 | 2.523861 |
| ILMN_1765876 | -0.23238 | 6.010988 | -4.58813 | 3.02E-05 | 0.003534 | 2.321806 |

|              |          |          |          |          |          |          |
|--------------|----------|----------|----------|----------|----------|----------|
| ILMN_1706505 | 0.230522 | 7.822645 | 3.455239 | 0.001129 | 0.038349 | -1.01256 |
| ILMN_1744239 | -0.23034 | 7.234171 | -6.78063 | 1.31E-08 | 2.27E-05 | 9.543456 |
| ILMN_3310840 | -0.22884 | 7.508302 | -3.93366 | 0.000258 | 0.015209 | 0.338395 |
| ILMN_2048633 | -0.2287  | 6.738295 | -5.3857  | 1.93E-06 | 0.000582 | 4.88454  |
| ILMN_1800225 | 0.228522 | 7.195323 | 3.5409   | 0.000873 | 0.033133 | -0.77795 |
| ILMN_1815079 | -0.22815 | 7.332429 | -3.51247 | 0.000951 | 0.034911 | -0.8562  |
| ILMN_1675992 | -0.22797 | 7.571294 | -5.50029 | 1.29E-06 | 0.000412 | 5.261591 |
| ILMN_2391264 | 0.227488 | 9.11132  | 3.701895 | 0.000533 | 0.024369 | -0.32812 |
| ILMN_2185563 | -0.22723 | 8.221271 | -6.61973 | 2.35E-08 | 3.11E-05 | 9.002351 |
| ILMN_2412922 | -0.22698 | 6.88533  | -5.93931 | 2.71E-07 | 0.000137 | 6.719428 |
| ILMN_1674620 | -0.22676 | 8.612633 | -4.50185 | 4.04E-05 | 0.004285 | 2.052949 |
| ILMN_1778319 | 0.225956 | 9.088586 | 3.50222  | 0.000981 | 0.035476 | -0.8843  |
| ILMN_1813489 | 0.225848 | 7.79926  | 6.313999 | 7.06E-08 | 5.66E-05 | 7.97469  |
| ILMN_2229379 | -0.22567 | 6.13363  | -3.56712 | 0.000806 | 0.03191  | -0.70546 |
| ILMN_1758213 | 0.225133 | 7.772904 | 5.891516 | 3.21E-07 | 0.000151 | 6.559904 |
| ILMN_1759184 | 0.22512  | 9.801106 | 4.806981 | 1.44E-05 | 0.002102 | 3.012107 |
| ILMN_1736729 | -0.22441 | 6.390611 | -3.36988 | 0.001455 | 0.044742 | -1.2429  |
| ILMN_1763091 | -0.22434 | 9.192508 | -4.57329 | 3.18E-05 | 0.003665 | 2.275425 |
| ILMN_1701837 | -0.22393 | 8.208807 | -6.43845 | 4.51E-08 | 4.55E-05 | 8.392816 |
| ILMN_2285404 | 0.223459 | 9.479853 | 3.969103 | 0.000231 | 0.01406  | 0.442146 |
| ILMN_3247848 | 0.223135 | 6.89447  | 4.776816 | 1.60E-05 | 0.002291 | 2.91629  |
| ILMN_1786429 | -0.22311 | 8.409264 | -3.50608 | 0.000969 | 0.035251 | -0.87372 |
| ILMN_1720373 | 0.222294 | 11.35699 | 4.863951 | 1.18E-05 | 0.001881 | 3.193611 |
| ILMN_1683127 | -0.22173 | 9.525091 | -3.60572 | 0.000717 | 0.029624 | -0.5982  |
| ILMN_2103397 | 0.221546 | 6.499243 | 5.637934 | 7.92E-07 | 0.000303 | 5.716625 |
| ILMN_1805064 | -0.2211  | 7.068874 | -3.54303 | 0.000867 | 0.033102 | -0.77207 |
| ILMN_2191568 | 0.221059 | 8.435229 | 5.503112 | 1.28E-06 | 0.000411 | 5.270902 |
| ILMN_1738759 | 0.220462 | 8.423502 | 7.643064 | 5.90E-10 | 5.09E-06 | 12.43144 |
| ILMN_1719204 | 0.220104 | 9.238663 | 6.026292 | 1.98E-07 | 0.000112 | 7.010176 |
| ILMN_1717765 | -0.21715 | 7.339418 | -3.44676 | 0.001158 | 0.03905  | -1.0356  |
| ILMN_1800573 | 0.215836 | 11.20054 | 4.014893 | 0.000199 | 0.012768 | 0.576886 |
| ILMN_1669113 | 0.215551 | 7.508813 | 5.291409 | 2.69E-06 | 0.000748 | 4.575597 |
| ILMN_1705302 | 0.2149   | 6.800363 | 3.743804 | 0.000468 | 0.022277 | -0.2092  |
| ILMN_3223181 | 0.214885 | 8.419154 | 4.188107 | 0.000114 | 0.008774 | 1.093256 |
| ILMN_1762275 | 0.214858 | 7.5074   | 5.87017  | 3.47E-07 | 0.000159 | 6.488707 |
| ILMN_1738552 | -0.21463 | 8.427499 | -4.59465 | 2.96E-05 | 0.003492 | 2.342214 |
| ILMN_1844611 | 0.214577 | 6.621864 | 6.353854 | 6.12E-08 | 5.32E-05 | 8.108555 |
| ILMN_1680453 | 0.214413 | 7.924674 | 4.24876  | 9.34E-05 | 0.007589 | 1.276446 |
| ILMN_2168520 | -0.21417 | 7.828221 | -3.7321  | 0.000486 | 0.022942 | -0.24248 |
| ILMN_2052208 | -0.2141  | 10.47724 | -3.39234 | 0.001361 | 0.043138 | -1.18262 |
| ILMN_1702609 | -0.21403 | 8.422294 | -4.40067 | 5.66E-05 | 0.005449 | 1.740287 |
| ILMN_1686555 | 0.213184 | 6.820999 | 4.425712 | 5.21E-05 | 0.0051   | 1.8174   |
| ILMN_1717639 | -0.21317 | 9.87896  | -3.58413 | 0.000765 | 0.030898 | -0.65828 |
| ILMN_2365595 | -0.21305 | 9.784162 | -5.19802 | 3.73E-06 | 0.000899 | 4.270947 |
| ILMN_1751161 | 0.212183 | 10.99825 | 3.339735 | 0.00159  | 0.047297 | -1.32341 |
| ILMN_1701331 | 0.211983 | 9.805817 | 7.313114 | 1.93E-09 | 8.24E-06 | 11.33046 |
| ILMN_2383484 | 0.21142  | 8.386668 | 5.809561 | 4.30E-07 | 0.000193 | 6.286748 |
| ILMN_2414165 | -0.21125 | 6.673397 | -3.40719 | 0.001303 | 0.042165 | -1.14266 |
| ILMN_1722634 | 0.211185 | 10.63075 | 4.449875 | 4.80E-05 | 0.004816 | 1.891981 |
| ILMN_1668629 | 0.211152 | 9.24065  | 3.597223 | 0.000735 | 0.030077 | -0.62187 |
| ILMN_2396982 | 0.21085  | 9.162116 | 6.050179 | 1.82E-07 | 0.000106 | 7.090099 |
| ILMN_1691731 | -0.21033 | 6.980087 | -3.57931 | 0.000777 | 0.031208 | -0.67165 |
| ILMN_1724181 | -0.21008 | 6.919197 | -4.97365 | 8.12E-06 | 0.001544 | 3.545032 |
| ILMN_1799890 | 0.209114 | 8.428338 | 4.974736 | 8.09E-06 | 0.001544 | 3.548524 |

|              |          |          |          |          |          |          |
|--------------|----------|----------|----------|----------|----------|----------|
| ILMN_1740429 | 0.208858 | 12.17058 | 3.860684 | 0.000325 | 0.017647 | 0.126232 |
| ILMN_1808713 | 0.208271 | 5.671269 | 4.202028 | 0.000109 | 0.008524 | 1.135196 |
| ILMN_2307450 | 0.208056 | 8.411141 | 3.997351 | 0.000211 | 0.013255 | 0.525175 |
| ILMN_2178855 | 0.206915 | 7.786853 | 5.127087 | 4.77E-06 | 0.001087 | 4.040485 |
| ILMN_1662640 | 0.206595 | 9.417851 | 3.974895 | 0.000226 | 0.01391  | 0.459146 |
| ILMN_1700109 | 0.205742 | 9.491388 | 4.03934  | 0.000184 | 0.012201 | 0.649131 |
| ILMN_1679093 | 0.205328 | 9.146616 | 3.763036 | 0.000441 | 0.021449 | -0.15439 |
| ILMN_1672004 | -0.20521 | 9.199863 | -3.83209 | 0.000356 | 0.018691 | 0.043664 |
| ILMN_1808777 | 0.205162 | 8.520059 | 4.503022 | 4.02E-05 | 0.004281 | 2.056601 |
| ILMN_1677919 | -0.20408 | 8.942454 | -5.13596 | 4.63E-06 | 0.001068 | 4.069263 |
| ILMN_1772981 | 0.204013 | 10.56743 | 5.902338 | 3.09E-07 | 0.00015  | 6.596011 |
| ILMN_1653358 | -0.20323 | 6.534286 | -3.3976  | 0.00134  | 0.042747 | -1.1685  |
| ILMN_2074748 | 0.202406 | 6.155482 | 5.343068 | 2.24E-06 | 0.000655 | 4.744693 |
| ILMN_1754842 | 0.20212  | 7.573756 | 4.868569 | 1.17E-05 | 0.001878 | 3.208355 |
| ILMN_1794190 | -0.20197 | 6.986232 | -4.46534 | 4.56E-05 | 0.00468  | 1.939801 |
| ILMN_1752953 | 0.201267 | 8.974141 | 5.614121 | 8.62E-07 | 0.000323 | 5.637752 |
| ILMN_1690105 | -0.20106 | 8.328354 | -3.33759 | 0.0016   | 0.047389 | -1.32912 |
| ILMN_1775962 | -0.20082 | 7.38938  | -4.45582 | 4.71E-05 | 0.00479  | 1.910353 |
| ILMN_1684964 | 0.200763 | 7.346486 | 4.236896 | 9.71E-05 | 0.007856 | 1.24052  |
| ILMN_2381197 | -0.20059 | 7.79262  | -4.9057  | 1.03E-05 | 0.001773 | 3.327072 |
| ILMN_1703330 | -0.20049 | 8.192523 | -3.91776 | 0.000271 | 0.015534 | 0.29198  |
| ILMN_1736575 | 0.200006 | 8.552527 | 4.937363 | 9.20E-06 | 0.001652 | 3.428517 |
| ILMN_1770537 | 0.199743 | 6.388881 | 5.586075 | 9.52E-07 | 0.000342 | 5.544937 |
| ILMN_1755909 | 0.199555 | 9.400336 | 6.416282 | 4.89E-08 | 4.68E-05 | 8.318317 |
| ILMN_2285817 | -0.19951 | 9.961391 | -3.83166 | 0.000356 | 0.018691 | 0.042439 |
| ILMN_1683635 | -0.19937 | 7.995629 | -3.63033 | 0.000665 | 0.028015 | -0.52947 |
| ILMN_3235325 | 0.199317 | 6.910267 | 3.529837 | 0.000902 | 0.03396  | -0.80844 |
| ILMN_1693421 | 0.1992   | 9.359146 | 6.459711 | 4.18E-08 | 4.37E-05 | 8.464292 |
| ILMN_2301083 | 0.19913  | 10.92932 | 4.834955 | 1.31E-05 | 0.001977 | 3.101144 |
| ILMN_1796074 | -0.19867 | 8.79714  | -3.79664 | 0.000397 | 0.020014 | -0.05824 |
| ILMN_2120022 | -0.19867 | 7.027162 | -4.02655 | 0.000192 | 0.012526 | 0.611297 |
| ILMN_1697218 | 0.198196 | 8.347213 | 5.058721 | 6.05E-06 | 0.001272 | 3.819194 |
| ILMN_1676515 | 0.197903 | 7.899452 | 3.692502 | 0.000549 | 0.024798 | -0.35467 |
| ILMN_2357438 | 0.19747  | 9.335569 | 4.379106 | 6.08E-05 | 0.00571  | 1.674016 |
| ILMN_1658425 | 0.197032 | 8.352206 | 5.248425 | 3.13E-06 | 0.000798 | 4.435204 |
| ILMN_1674034 | -0.19643 | 8.200939 | -4.31745 | 7.45E-05 | 0.006553 | 1.485324 |
| ILMN_1675709 | 0.195906 | 7.207505 | 6.653702 | 2.08E-08 | 2.87E-05 | 9.116617 |
| ILMN_3233388 | -0.19557 | 8.969333 | -5.22408 | 3.40E-06 | 0.000844 | 4.355815 |
| ILMN_2061732 | -0.19519 | 9.634742 | -4.02326 | 0.000194 | 0.012553 | 0.601599 |
| ILMN_3247018 | -0.19483 | 8.265002 | -5.99347 | 2.23E-07 | 0.000122 | 6.90042  |
| ILMN_1704793 | 0.194785 | 8.555961 | 4.669246 | 2.30E-05 | 0.002936 | 2.576319 |
| ILMN_1676631 | 0.194407 | 6.992579 | 3.463795 | 0.0011   | 0.037789 | -0.98928 |
| ILMN_2208777 | -0.19411 | 7.885326 | -3.53943 | 0.000877 | 0.033207 | -0.78199 |
| ILMN_2173611 | 0.193725 | 12.17228 | 3.807335 | 0.000384 | 0.019694 | -0.02755 |
| ILMN_1675612 | 0.193238 | 9.179098 | 5.125719 | 4.79E-06 | 0.001087 | 4.03605  |
| ILMN_1738681 | 0.19294  | 10.25065 | 6.114714 | 1.44E-07 | 9.22E-05 | 7.306192 |
| ILMN_1703487 | -0.19257 | 8.843029 | -4.56564 | 3.26E-05 | 0.003717 | 2.251535 |
| ILMN_2392370 | 0.192392 | 6.342761 | 3.595252 | 0.00074  | 0.030187 | -0.62736 |
| ILMN_1691436 | -0.19208 | 9.590865 | -4.60436 | 2.86E-05 | 0.003415 | 2.372605 |
| ILMN_1764571 | 0.191231 | 10.18131 | 3.615479 | 0.000696 | 0.028963 | -0.57098 |
| ILMN_1656933 | 0.191167 | 6.331613 | 4.477424 | 4.38E-05 | 0.004538 | 1.977217 |
| ILMN_1669479 | 0.191121 | 7.352698 | 3.574264 | 0.000789 | 0.031452 | -0.68566 |
| ILMN_1665831 | 0.189996 | 8.995949 | 4.524969 | 3.74E-05 | 0.004072 | 2.124809 |
| ILMN_2183409 | 0.18901  | 8.259481 | 4.319412 | 7.40E-05 | 0.006528 | 1.491297 |

|              |          |          |          |          |          |          |
|--------------|----------|----------|----------|----------|----------|----------|
| ILMN_2170814 | -0.1889  | 6.727254 | -3.31166 | 0.001726 | 0.049228 | -1.39799 |
| ILMN_1671005 | -0.1888  | 8.024776 | -5.07809 | 5.66E-06 | 0.001219 | 3.881787 |
| ILMN_1656670 | -0.18857 | 6.613323 | -5.73256 | 5.66E-07 | 0.000235 | 6.030603 |
| ILMN_1715401 | 0.188487 | 8.08212  | 3.472876 | 0.001071 | 0.03739  | -0.96453 |
| ILMN_1710752 | -0.18813 | 8.511522 | -4.88736 | 1.09E-05 | 0.001811 | 3.268396 |
| ILMN_1789642 | 0.188095 | 6.892939 | 5.311884 | 2.50E-06 | 0.000713 | 4.64257  |
| ILMN_1811195 | 0.188049 | 6.387587 | 4.621262 | 2.70E-05 | 0.003271 | 2.425565 |
| ILMN_1694111 | 0.1879   | 8.130744 | 5.339762 | 2.27E-06 | 0.000657 | 4.733859 |
| ILMN_1810467 | 0.187843 | 10.56074 | 4.848859 | 1.25E-05 | 0.001927 | 3.145461 |
| ILMN_1815306 | 0.187757 | 7.293171 | 5.737409 | 5.56E-07 | 0.000234 | 6.046731 |
| ILMN_1913510 | 0.187665 | 6.677522 | 4.039633 | 0.000184 | 0.012201 | 0.65     |
| ILMN_1679401 | 0.187491 | 7.031703 | 4.375481 | 6.15E-05 | 0.005732 | 1.662888 |
| ILMN_2204467 | 0.187172 | 5.783277 | 3.472004 | 0.001074 | 0.037399 | -0.96691 |
| ILMN_1685540 | 0.187144 | 7.832534 | 4.866844 | 1.17E-05 | 0.00188  | 3.202847 |
| ILMN_1696585 | 0.18682  | 8.641957 | 3.649135 | 0.000627 | 0.027177 | -0.47678 |
| ILMN_1684873 | -0.18681 | 6.878608 | -3.71091 | 0.000519 | 0.023964 | -0.3026  |
| ILMN_1704418 | -0.18673 | 7.854408 | -3.60203 | 0.000725 | 0.029781 | -0.60849 |
| ILMN_2408566 | -0.1865  | 6.390289 | -3.49429 | 0.001004 | 0.035992 | -0.90602 |
| ILMN_1706342 | 0.186336 | 7.352996 | 4.104384 | 0.000149 | 0.010661 | 0.842382 |
| ILMN_2048478 | 0.186003 | 6.143759 | 4.949481 | 8.83E-06 | 0.001614 | 3.467399 |
| ILMN_1658989 | 0.185825 | 6.267611 | 5.972922 | 2.40E-07 | 0.000125 | 6.831728 |
| ILMN_2411897 | -0.18571 | 7.291889 | -3.91383 | 0.000275 | 0.015619 | 0.280544 |
| ILMN_1746494 | -0.18567 | 7.881911 | -4.30253 | 7.83E-05 | 0.006729 | 1.439812 |
| ILMN_1672504 | 0.185439 | 9.839358 | 4.481865 | 4.32E-05 | 0.004511 | 1.990976 |
| ILMN_1731720 | 0.18528  | 7.562784 | 5.004482 | 7.30E-06 | 0.001422 | 3.644236 |
| ILMN_1671191 | 0.185117 | 10.86306 | 4.712733 | 1.98E-05 | 0.002726 | 2.713431 |
| ILMN_1907834 | -0.18486 | 8.321906 | -3.70227 | 0.000533 | 0.024369 | -0.32706 |
| ILMN_1715476 | 0.184802 | 9.924509 | 4.832868 | 1.32E-05 | 0.001983 | 3.094494 |
| ILMN_2045994 | 0.184523 | 8.174052 | 5.06525  | 5.91E-06 | 0.001252 | 3.840292 |
| ILMN_1676026 | 0.183751 | 8.684089 | 4.929238 | 9.46E-06 | 0.001673 | 3.402464 |
| ILMN_2367191 | 0.183402 | 9.505748 | 4.685883 | 2.17E-05 | 0.002838 | 2.628721 |
| ILMN_2173294 | -0.18334 | 6.696235 | -4.37644 | 6.13E-05 | 0.005729 | 1.665827 |
| ILMN_1672606 | -0.18324 | 6.181561 | -3.38014 | 0.001411 | 0.044156 | -1.21541 |
| ILMN_2366041 | 0.183227 | 7.879147 | 4.769074 | 1.64E-05 | 0.002343 | 2.891731 |
| ILMN_1701731 | 0.183105 | 9.033921 | 4.410899 | 5.47E-05 | 0.005297 | 1.771758 |
| ILMN_1773154 | -0.18285 | 11.15561 | -3.72109 | 0.000503 | 0.023418 | -0.27374 |
| ILMN_1804822 | 0.182836 | 8.721351 | 3.770641 | 0.000431 | 0.021134 | -0.13267 |
| ILMN_1762284 | 0.182677 | 5.861403 | 6.463156 | 4.13E-08 | 4.37E-05 | 8.475871 |
| ILMN_1692790 | -0.18232 | 8.579602 | -5.20682 | 3.61E-06 | 0.000884 | 4.299579 |
| ILMN_1759175 | -0.18216 | 6.883299 | -5.73779 | 5.56E-07 | 0.000234 | 6.047989 |
| ILMN_1699570 | 0.181596 | 9.942182 | 6.074689 | 1.67E-07 | 0.000101 | 7.172143 |
| ILMN_2363273 | 0.181107 | 7.012101 | 4.304059 | 7.79E-05 | 0.006712 | 1.444479 |
| ILMN_2405680 | -0.18109 | 7.10555  | -3.62337 | 0.000679 | 0.028507 | -0.54893 |
| ILMN_2372639 | -0.18043 | 8.914962 | -3.65524 | 0.000616 | 0.026807 | -0.45962 |
| ILMN_3297880 | 0.179973 | 8.630585 | 4.112943 | 0.000145 | 0.010435 | 0.86792  |
| ILMN_1763605 | 0.17932  | 6.9534   | 6.890572 | 8.84E-09 | 1.76E-05 | 9.913057 |
| ILMN_1751886 | -0.17897 | 6.981708 | -3.36696 | 0.001467 | 0.044915 | -1.25072 |
| ILMN_1807833 | 0.17857  | 8.049537 | 6.275391 | 8.11E-08 | 6.25E-05 | 7.845061 |
| ILMN_1730906 | -0.17854 | 7.259968 | -3.65798 | 0.000611 | 0.02665  | -0.45194 |
| ILMN_2410772 | -0.17831 | 8.289186 | -4.96176 | 8.46E-06 | 0.001593 | 3.50684  |
| ILMN_2375360 | -0.17815 | 7.721413 | -3.7974  | 0.000396 | 0.02001  | -0.05608 |
| ILMN_1790160 | -0.1778  | 6.571739 | -3.99516 | 0.000212 | 0.013299 | 0.51873  |
| ILMN_1786976 | 0.17774  | 8.587619 | 5.100876 | 5.23E-06 | 0.001155 | 3.955546 |
| ILMN_1664608 | 0.177569 | 8.508847 | 4.731513 | 1.86E-05 | 0.002598 | 2.772779 |



|              |          |          |          |          |          |          |
|--------------|----------|----------|----------|----------|----------|----------|
| ILMN_2278653 | 0.177359 | 6.360961 | 5.055751 | 6.11E-06 | 0.001277 | 3.809601 |
| ILMN_2186061 | -0.17718 | 8.656237 | -3.91689 | 0.000272 | 0.015534 | 0.28944  |
| ILMN_1692100 | 0.176841 | 7.14129  | 4.398596 | 5.70E-05 | 0.005463 | 1.733899 |
| ILMN_1801442 | 0.176668 | 6.102062 | 4.128634 | 0.000138 | 0.010087 | 0.914804 |
| ILMN_1709044 | 0.176641 | 6.638544 | 4.415896 | 5.38E-05 | 0.005254 | 1.787148 |
| ILMN_2132458 | -0.17657 | 6.416718 | -3.43916 | 0.001185 | 0.03959  | -1.0562  |
| ILMN_1680955 | 0.17627  | 9.580702 | 4.00823  | 0.000203 | 0.012943 | 0.557232 |
| ILMN_1688154 | 0.175568 | 6.980757 | 3.562912 | 0.000816 | 0.032056 | -0.71712 |
| ILMN_2334350 | 0.175562 | 8.363866 | 4.077985 | 0.000163 | 0.011215 | 0.763771 |
| ILMN_1679655 | 0.175524 | 8.886264 | 3.498224 | 0.000992 | 0.035741 | -0.89525 |
| ILMN_1666078 | -0.17499 | 7.427113 | -6.21834 | 9.96E-08 | 7.31E-05 | 7.653598 |
| ILMN_2201347 | 0.174985 | 7.533335 | 4.972513 | 8.15E-06 | 0.001544 | 3.541379 |
| ILMN_1745152 | 0.17485  | 8.553972 | 5.507517 | 1.26E-06 | 0.000411 | 5.285429 |
| ILMN_2095704 | 0.174738 | 6.640483 | 3.422096 | 0.001246 | 0.040958 | -1.10241 |
| ILMN_1714730 | 0.174704 | 10.85933 | 4.168721 | 0.000121 | 0.009087 | 1.034957 |
| ILMN_2358560 | -0.17463 | 6.421356 | -4.85494 | 1.22E-05 | 0.00192  | 3.164861 |
| ILMN_1794643 | 0.174571 | 7.454543 | 5.560479 | 1.04E-06 | 0.000367 | 5.460306 |
| ILMN_1771233 | 0.174517 | 8.313767 | 6.470291 | 4.02E-08 | 4.37E-05 | 8.499858 |
| ILMN_1736112 | -0.17435 | 7.564912 | -4.94376 | 9.00E-06 | 0.001625 | 3.449048 |
| ILMN_1697363 | 0.174309 | 8.470232 | 3.520852 | 0.000927 | 0.034592 | -0.83316 |
| ILMN_1677534 | 0.17419  | 8.546457 | 3.366014 | 0.001472 | 0.044915 | -1.25325 |
| ILMN_1709634 | -0.17397 | 7.720106 | -4.56121 | 3.31E-05 | 0.003717 | 2.237729 |
| ILMN_1652677 | -0.17391 | 8.342189 | -3.3957  | 0.001348 | 0.042868 | -1.17359 |
| ILMN_1729225 | 0.173908 | 6.254295 | 3.477504 | 0.001056 | 0.036968 | -0.9519  |
| ILMN_1722811 | 0.173901 | 7.815689 | 3.311124 | 0.001729 | 0.049265 | -1.3994  |
| ILMN_1802615 | 0.173846 | 9.055348 | 3.418623 | 0.001259 | 0.041228 | -1.1118  |
| ILMN_3236061 | 0.173539 | 6.878669 | 4.314972 | 7.51E-05 | 0.006573 | 1.47775  |
| ILMN_1654060 | -0.17348 | 7.42097  | -4.8139  | 1.41E-05 | 0.002071 | 3.03412  |
| ILMN_2324056 | 0.173418 | 9.370995 | 3.687029 | 0.000558 | 0.024842 | -0.37013 |
| ILMN_1816342 | -0.17299 | 7.914214 | -3.83787 | 0.000349 | 0.018505 | 0.060324 |
| ILMN_1806790 | 0.172863 | 7.722227 | 4.051389 | 0.000177 | 0.011939 | 0.684819 |
| ILMN_2120340 | 0.172707 | 8.387977 | 5.267454 | 2.92E-06 | 0.000776 | 4.497322 |
| ILMN_1660973 | -0.17264 | 6.450034 | -3.4078  | 0.0013   | 0.042135 | -1.14101 |
| ILMN_2211800 | 0.172642 | 9.738804 | 3.968175 | 0.000231 | 0.01406  | 0.439424 |
| ILMN_2234343 | 0.172509 | 6.551563 | 3.954537 | 0.000242 | 0.014507 | 0.399445 |
| ILMN_1791569 | 0.172497 | 7.56294  | 4.336619 | 6.99E-05 | 0.006264 | 1.543858 |
| ILMN_2081398 | 0.17235  | 7.795199 | 5.985085 | 2.30E-07 | 0.000124 | 6.872378 |
| ILMN_1744046 | -0.17216 | 7.48544  | -5.01294 | 7.09E-06 | 0.001405 | 3.671498 |
| ILMN_1778374 | -0.17183 | 10.17323 | -4.90213 | 1.04E-05 | 0.001773 | 3.315629 |
| ILMN_1735156 | 0.171803 | 6.574918 | 4.449823 | 4.81E-05 | 0.004816 | 1.891819 |
| ILMN_2382829 | 0.171691 | 9.007533 | 6.150213 | 1.27E-07 | 8.77E-05 | 7.425149 |
| ILMN_2105308 | 0.171574 | 10.92409 | 4.590978 | 2.99E-05 | 0.003524 | 2.330717 |
| ILMN_2102693 | -0.17083 | 8.757085 | -3.56228 | 0.000818 | 0.032056 | -0.71886 |
| ILMN_2102960 | -0.17065 | 8.064303 | -4.38512 | 5.96E-05 | 0.005643 | 1.692474 |
| ILMN_3197097 | -0.17064 | 8.289104 | -3.7302  | 0.000489 | 0.023046 | -0.24787 |
| ILMN_1790136 | 0.16997  | 8.813088 | 4.323791 | 7.30E-05 | 0.006451 | 1.504667 |
| ILMN_1678454 | -0.16991 | 9.454743 | -5.16909 | 4.12E-06 | 0.000967 | 4.176853 |
| ILMN_1745242 | -0.16991 | 7.429544 | -4.03891 | 0.000184 | 0.012201 | 0.647854 |
| ILMN_1777721 | 0.169788 | 10.37908 | 5.607787 | 8.82E-07 | 0.000327 | 5.616784 |
| ILMN_2232166 | -0.16935 | 10.40064 | -5.59252 | 9.31E-07 | 0.000338 | 5.566247 |
| ILMN_1710000 | -0.16934 | 6.626573 | -6.54454 | 3.08E-08 | 3.79E-05 | 8.749499 |
| ILMN_1812856 | 0.16923  | 8.03135  | 7.474006 | 1.08E-09 | 6.22E-06 | 11.86813 |
| ILMN_1728057 | -0.1692  | 6.695851 | -5.07963 | 5.63E-06 | 0.001219 | 3.886771 |
| ILMN_1732398 | 0.168896 | 5.518001 | 4.264737 | 8.86E-05 | 0.007286 | 1.324894 |

|              |          |          |          |          |          |          |
|--------------|----------|----------|----------|----------|----------|----------|
| ILMN_1800451 | -0.16878 | 8.17736  | -5.15291 | 4.36E-06 | 0.001016 | 4.124275 |
| ILMN_1719986 | -0.16868 | 7.162071 | -3.39488 | 0.001351 | 0.042894 | -1.1758  |
| ILMN_2359453 | 0.168482 | 10.66599 | 4.763603 | 1.67E-05 | 0.002377 | 2.874385 |
| ILMN_1792679 | -0.16835 | 7.392167 | -3.46422 | 0.001099 | 0.037789 | -0.98813 |
| ILMN_1806106 | 0.168007 | 9.807794 | 3.83157  | 0.000356 | 0.018691 | 0.042166 |
| ILMN_1784110 | -0.16771 | 6.786576 | -3.85135 | 0.000335 | 0.018029 | 0.099257 |
| ILMN_1700541 | 0.167671 | 8.967071 | 3.439206 | 0.001184 | 0.03959  | -1.05609 |
| ILMN_2368713 | 0.167403 | 10.02075 | 4.563355 | 3.29E-05 | 0.003717 | 2.244411 |
| ILMN_1707783 | 0.166958 | 11.66934 | 3.743032 | 0.00047  | 0.022299 | -0.2114  |
| ILMN_2410771 | -0.16683 | 8.061131 | -5.50997 | 1.25E-06 | 0.000411 | 5.293528 |
| ILMN_1742731 | 0.16672  | 8.820646 | 5.112077 | 5.03E-06 | 0.001126 | 3.991829 |
| ILMN_1676984 | -0.16655 | 6.687393 | -4.85233 | 1.23E-05 | 0.001922 | 3.156543 |
| ILMN_2148668 | -0.1663  | 7.46236  | -3.89921 | 0.000288 | 0.016136 | 0.237968 |
| ILMN_3235647 | -0.16624 | 8.369752 | -3.35258 | 0.001531 | 0.046017 | -1.28916 |
| ILMN_1664028 | 0.166099 | 9.475459 | 4.855172 | 1.22E-05 | 0.00192  | 3.165597 |
| ILMN_1680465 | -0.16545 | 6.953166 | -3.48612 | 0.001029 | 0.036544 | -0.92836 |
| ILMN_1735658 | -0.16523 | 9.171766 | -3.96452 | 0.000234 | 0.014175 | 0.428704 |
| ILMN_1652594 | 0.165046 | 6.7758   | 5.268598 | 2.91E-06 | 0.000776 | 4.50106  |
| ILMN_1801313 | -0.16471 | 8.011372 | -3.45476 | 0.001131 | 0.038365 | -1.01385 |
| ILMN_1700168 | 0.164566 | 6.401959 | 3.921981 | 0.000268 | 0.015534 | 0.304292 |
| ILMN_2155708 | -0.16418 | 5.724865 | -5.53255 | 1.15E-06 | 0.000393 | 5.368038 |
| ILMN_1815024 | -0.164   | 10.93684 | -4.3012  | 7.86E-05 | 0.006742 | 1.43576  |
| ILMN_1761941 | -0.16374 | 6.231543 | -3.39842 | 0.001337 | 0.042702 | -1.16628 |
| ILMN_1658992 | 0.163676 | 10.34544 | 5.267271 | 2.93E-06 | 0.000776 | 4.496723 |
| ILMN_1807291 | 0.16353  | 5.682917 | 3.594647 | 0.000741 | 0.030188 | -0.62904 |
| ILMN_1728710 | 0.16342  | 6.954481 | 3.5585   | 0.000827 | 0.032266 | -0.72933 |
| ILMN_1712035 | 0.163416 | 7.517737 | 3.893636 | 0.000293 | 0.01629  | 0.221775 |
| ILMN_1660723 | 0.163269 | 7.815519 | 3.470366 | 0.001079 | 0.037464 | -0.97137 |
| ILMN_3236825 | -0.16319 | 7.840291 | -3.97283 | 0.000228 | 0.013966 | 0.453091 |
| ILMN_2095759 | -0.16317 | 8.509451 | -3.95432 | 0.000242 | 0.014507 | 0.398819 |
| ILMN_1733667 | 0.163041 | 7.146015 | 5.657224 | 7.40E-07 | 0.00029  | 5.780561 |
| ILMN_1791388 | 0.162698 | 8.038381 | 4.974707 | 8.09E-06 | 0.001544 | 3.548431 |
| ILMN_1683313 | 0.162422 | 7.73199  | 4.878969 | 1.12E-05 | 0.001838 | 3.241577 |
| ILMN_1801105 | 0.162318 | 8.112307 | 4.60092  | 2.90E-05 | 0.003443 | 2.361829 |
| ILMN_2142117 | -0.16231 | 9.308538 | -4.11217 | 0.000146 | 0.01044  | 0.865606 |
| ILMN_2394276 | -0.16208 | 7.018932 | -5.0389  | 6.48E-06 | 0.00133  | 3.755186 |
| ILMN_1714741 | -0.16198 | 7.070954 | -3.80551 | 0.000386 | 0.01977  | -0.03281 |
| ILMN_3244323 | 0.161878 | 8.420129 | 4.988456 | 7.72E-06 | 0.001494 | 3.592649 |
| ILMN_1734138 | 0.16177  | 7.228567 | 4.191438 | 0.000113 | 0.008743 | 1.103288 |
| ILMN_1785644 | 0.161693 | 7.199323 | 4.169125 | 0.000121 | 0.009087 | 1.036173 |
| ILMN_1705252 | 0.161587 | 6.430172 | 3.725341 | 0.000496 | 0.023197 | -0.26168 |
| ILMN_1751464 | -0.1612  | 6.77298  | -3.9164  | 0.000273 | 0.015534 | 0.288014 |
| ILMN_2405254 | -0.16075 | 7.769166 | -3.33529 | 0.001611 | 0.047559 | -1.33525 |
| ILMN_1803856 | -0.16071 | 6.942534 | -3.62339 | 0.000679 | 0.028507 | -0.54888 |
| ILMN_1781454 | 0.160641 | 8.591168 | 4.377337 | 6.11E-05 | 0.005728 | 1.668583 |
| ILMN_1669703 | 0.160472 | 8.590866 | 3.822009 | 0.000367 | 0.019072 | 0.014633 |
| ILMN_1798256 | -0.16026 | 10.07763 | -3.58664 | 0.00076  | 0.030714 | -0.6513  |
| ILMN_1681326 | 0.160005 | 5.931447 | 6.236458 | 9.33E-08 | 6.99E-05 | 7.714393 |
| ILMN_1701243 | 0.160004 | 7.875346 | 4.038393 | 0.000185 | 0.012201 | 0.646331 |
| ILMN_1714352 | 0.159676 | 7.136768 | 3.320255 | 0.001683 | 0.048567 | -1.37519 |
| ILMN_2326509 | -0.15948 | 8.811935 | -3.43285 | 0.001207 | 0.040051 | -1.07331 |
| ILMN_3239217 | 0.159464 | 6.633795 | 4.571844 | 3.19E-05 | 0.00367  | 2.270912 |
| ILMN_1670079 | -0.15928 | 8.026146 | -3.49006 | 0.001017 | 0.036364 | -0.9176  |
| ILMN_1745885 | 0.159247 | 10.33155 | 4.22465  | 0.000101 | 0.00812  | 1.203485 |

|              |          |          |          |          |          |          |
|--------------|----------|----------|----------|----------|----------|----------|
| ILMN_1756806 | -0.15912 | 8.925277 | -3.55267 | 0.000842 | 0.032579 | -0.74544 |
| ILMN_1801833 | -0.15905 | 6.69055  | -3.43092 | 0.001214 | 0.040167 | -1.07855 |
| ILMN_1665526 | 0.158704 | 6.424292 | 3.417115 | 0.001265 | 0.041319 | -1.11587 |
| ILMN_1695110 | 0.158563 | 7.942509 | 3.876396 | 0.000309 | 0.016928 | 0.171736 |
| ILMN_1719286 | 0.158512 | 7.652052 | 3.963292 | 0.000235 | 0.014201 | 0.425102 |
| ILMN_1702211 | -0.15839 | 6.537614 | -3.74684 | 0.000464 | 0.022098 | -0.20055 |
| ILMN_1764522 | 0.158016 | 7.828939 | 3.384367 | 0.001394 | 0.043886 | -1.20406 |
| ILMN_1687315 | 0.157577 | 10.13046 | 3.466804 | 0.001091 | 0.037673 | -0.98108 |
| ILMN_1790455 | 0.157531 | 6.554547 | 4.143801 | 0.000131 | 0.009706 | 0.960202 |
| ILMN_1700727 | -0.15706 | 6.382961 | -4.70373 | 2.05E-05 | 0.002744 | 2.684995 |
| ILMN_1721022 | 0.156905 | 11.28542 | 4.631292 | 2.61E-05 | 0.003184 | 2.457029 |
| ILMN_1683204 | 0.156723 | 8.05968  | 5.907633 | 3.03E-07 | 0.000149 | 6.613683 |
| ILMN_1683082 | 0.156607 | 7.593366 | 4.525294 | 3.73E-05 | 0.004072 | 2.125819 |
| ILMN_1808591 | 0.156492 | 9.949389 | 4.102476 | 0.00015  | 0.010705 | 0.836692 |
| ILMN_1784641 | 0.156322 | 10.54662 | 3.456775 | 0.001124 | 0.038324 | -1.00838 |
| ILMN_1771815 | 0.156272 | 10.19336 | 6.654702 | 2.07E-08 | 2.87E-05 | 9.119979 |
| ILMN_1750400 | -0.15614 | 6.36807  | -3.86324 | 0.000322 | 0.017561 | 0.13363  |
| ILMN_1663954 | 0.15608  | 9.208176 | 3.94169  | 0.000252 | 0.014928 | 0.361851 |
| ILMN_1695386 | -0.15588 | 8.615201 | -5.4452  | 1.57E-06 | 0.000491 | 5.080094 |
| ILMN_1797698 | 0.155868 | 7.248442 | 6.529965 | 3.25E-08 | 3.86E-05 | 8.700493 |
| ILMN_1768391 | -0.15583 | 6.295915 | -4.49123 | 4.19E-05 | 0.004399 | 2.020023 |
| ILMN_1737535 | 0.15535  | 7.809927 | 4.879032 | 1.12E-05 | 0.001838 | 3.241776 |
| ILMN_1812940 | 0.155224 | 8.171079 | 4.230794 | 9.90E-05 | 0.007996 | 1.22206  |
| ILMN_2407464 | 0.155055 | 8.370746 | 3.715812 | 0.000511 | 0.023707 | -0.28871 |
| ILMN_1770505 | -0.155   | 6.104167 | -3.63683 | 0.000652 | 0.0277   | -0.51127 |
| ILMN_1658706 | -0.15463 | 7.564188 | -3.40987 | 0.001292 | 0.041956 | -1.13543 |
| ILMN_1665797 | 0.15461  | 10.52642 | 3.881786 | 0.000304 | 0.016722 | 0.187367 |
| ILMN_2357193 | -0.15455 | 6.711349 | -4.8304  | 1.33E-05 | 0.001991 | 3.086621 |
| ILMN_2125010 | -0.15444 | 7.894929 | -4.34548 | 6.79E-05 | 0.006115 | 1.570943 |
| ILMN_1716821 | 0.154382 | 8.044105 | 3.508274 | 0.000963 | 0.035111 | -0.8677  |
| ILMN_1737426 | -0.15423 | 9.140574 | -3.6893  | 0.000555 | 0.024798 | -0.3637  |
| ILMN_1772731 | -0.15403 | 8.037967 | -3.36542 | 0.001474 | 0.044936 | -1.25485 |
| ILMN_1751743 | 0.153779 | 7.111816 | 4.868853 | 1.16E-05 | 0.001878 | 3.209261 |
| ILMN_3244803 | 0.153575 | 6.940247 | 4.372629 | 6.21E-05 | 0.00577  | 1.654138 |
| ILMN_1691117 | 0.153522 | 8.642115 | 5.032905 | 6.62E-06 | 0.001345 | 3.735851 |
| ILMN_2126239 | 0.153477 | 7.785695 | 3.752896 | 0.000455 | 0.021837 | -0.18331 |
| ILMN_1801616 | -0.1533  | 12.96734 | -3.32389 | 0.001666 | 0.048418 | -1.36554 |
| ILMN_1722218 | 0.153028 | 7.885802 | 4.298708 | 7.93E-05 | 0.00678  | 1.428178 |
| ILMN_1759436 | 0.152915 | 9.846954 | 3.697246 | 0.000541 | 0.024611 | -0.34126 |
| ILMN_1669390 | 0.152882 | 9.29823  | 3.364853 | 0.001477 | 0.044971 | -1.25636 |
| ILMN_1654001 | -0.15274 | 7.716196 | -4.29692 | 7.97E-05 | 0.006787 | 1.422735 |
| ILMN_2183687 | 0.152672 | 6.975102 | 4.950134 | 8.81E-06 | 0.001614 | 3.469493 |
| ILMN_1755352 | 0.152606 | 5.878212 | 3.466495 | 0.001092 | 0.037673 | -0.98192 |
| ILMN_1771987 | 0.152459 | 9.357103 | 3.754671 | 0.000453 | 0.021777 | -0.17825 |
| ILMN_2265654 | 0.152282 | 6.254246 | 5.048628 | 6.27E-06 | 0.001301 | 3.786596 |
| ILMN_1760490 | -0.1522  | 8.651016 | -4.7446  | 1.78E-05 | 0.002495 | 2.814195 |
| ILMN_1675007 | 0.152128 | 6.451682 | 5.030493 | 6.67E-06 | 0.001345 | 3.72807  |
| ILMN_1666385 | 0.152057 | 11.11719 | 3.755176 | 0.000452 | 0.021773 | -0.17681 |
| ILMN_2075820 | -0.15176 | 7.453887 | -4.79889 | 1.48E-05 | 0.002143 | 2.986394 |
| ILMN_1811729 | 0.151555 | 7.58875  | 3.796402 | 0.000398 | 0.020014 | -0.05893 |
| ILMN_2357781 | 0.151529 | 6.984022 | 3.488554 | 0.001022 | 0.036428 | -0.92172 |
| ILMN_1810334 | 0.151444 | 8.569222 | 4.051957 | 0.000177 | 0.011939 | 0.686501 |
| ILMN_1809478 | 0.151262 | 11.47705 | 3.355385 | 0.001518 | 0.045758 | -1.28167 |
| ILMN_1782829 | 0.151193 | 6.668202 | 4.027037 | 0.000192 | 0.012526 | 0.612747 |

|              |          |          |          |          |          |          |
|--------------|----------|----------|----------|----------|----------|----------|
| ILMN_1711383 | 0.151177 | 9.415097 | 5.291891 | 2.68E-06 | 0.000748 | 4.577174 |
| ILMN_1735955 | 0.151077 | 8.686113 | 3.319045 | 0.001689 | 0.048699 | -1.37841 |
| ILMN_1729368 | 0.151074 | 6.394802 | 5.910464 | 3.00E-07 | 0.000149 | 6.623132 |
| ILMN_1668369 | -0.15095 | 11.22509 | -3.76059 | 0.000445 | 0.02153  | -0.16137 |
| ILMN_3248857 | -0.1505  | 6.346806 | -4.03408 | 0.000187 | 0.012277 | 0.633578 |
| ILMN_2323491 | 0.150433 | 8.391228 | 4.828619 | 1.34E-05 | 0.001995 | 3.08096  |
| ILMN_1810891 | 0.150375 | 7.421438 | 3.953964 | 0.000242 | 0.014507 | 0.397768 |
| ILMN_2283388 | 0.149732 | 10.62316 | 3.942651 | 0.000251 | 0.014908 | 0.36466  |
| ILMN_1776375 | -0.14925 | 9.59331  | -4.89796 | 1.05E-05 | 0.001789 | 3.302307 |
| ILMN_1728059 | 0.149219 | 7.675856 | 4.047887 | 0.000179 | 0.012019 | 0.674441 |
| ILMN_1674394 | 0.149054 | 8.769143 | 3.465469 | 0.001095 | 0.037751 | -0.98472 |
| ILMN_1683059 | -0.14904 | 7.756932 | -3.41532 | 0.001272 | 0.041439 | -1.12073 |
| ILMN_1765684 | -0.14901 | 10.39111 | -3.42716 | 0.001228 | 0.040541 | -1.08872 |
| ILMN_1711450 | 0.148957 | 9.412244 | 3.927086 | 0.000264 | 0.015398 | 0.319188 |
| ILMN_1779034 | -0.1489  | 7.691803 | -4.51662 | 3.84E-05 | 0.004141 | 2.098855 |
| ILMN_3225784 | 0.148858 | 12.80393 | 3.32925  | 0.00164  | 0.047945 | -1.35131 |
| ILMN_1770653 | -0.14855 | 11.45875 | -4.36096 | 6.45E-05 | 0.005918 | 1.618345 |
| ILMN_1717809 | 0.148416 | 6.697764 | 3.762703 | 0.000442 | 0.021449 | -0.15534 |
| ILMN_1755862 | 0.147969 | 8.186322 | 3.553976 | 0.000839 | 0.032546 | -0.74184 |
| ILMN_1667594 | -0.14787 | 6.850008 | -3.71985 | 0.000505 | 0.023476 | -0.27725 |
| ILMN_1770338 | -0.14774 | 11.67637 | -3.45529 | 0.001129 | 0.038349 | -1.01242 |
| ILMN_1777449 | -0.14767 | 7.981589 | -3.37235 | 0.001444 | 0.044537 | -1.23628 |
| ILMN_1725427 | -0.14763 | 11.94789 | -3.40402 | 0.001315 | 0.042371 | -1.15118 |
| ILMN_1713006 | -0.14757 | 7.403597 | -3.93071 | 0.000261 | 0.0153   | 0.329753 |
| ILMN_1793203 | 0.147465 | 7.931098 | 4.558502 | 3.34E-05 | 0.003739 | 2.229268 |
| ILMN_2332558 | -0.14715 | 9.264805 | -4.58897 | 3.01E-05 | 0.003534 | 2.32445  |
| ILMN_1710844 | -0.1471  | 6.676328 | -3.89772 | 0.000289 | 0.016159 | 0.23364  |
| ILMN_2359456 | 0.146922 | 8.970854 | 4.048175 | 0.000179 | 0.012019 | 0.675296 |
| ILMN_2173451 | 0.146891 | 9.157835 | 3.630748 | 0.000664 | 0.028014 | -0.5283  |
| ILMN_1792748 | 0.14676  | 6.144422 | 4.194433 | 0.000112 | 0.008678 | 1.112308 |
| ILMN_1738229 | 0.146561 | 8.189289 | 4.210926 | 0.000106 | 0.008375 | 1.162037 |
| ILMN_1652754 | 0.146215 | 8.936248 | 3.558785 | 0.000827 | 0.032266 | -0.72854 |
| ILMN_3272768 | -0.14617 | 6.624888 | -6.00888 | 2.11E-07 | 0.000117 | 6.951944 |
| ILMN_1737685 | 0.146161 | 9.912017 | 3.336211 | 0.001606 | 0.047499 | -1.33279 |
| ILMN_1769575 | 0.146114 | 5.614811 | 3.64837  | 0.000629 | 0.027207 | -0.47892 |
| ILMN_1695679 | -0.14602 | 6.135872 | -3.37692 | 0.001425 | 0.044289 | -1.22404 |
| ILMN_1711023 | 0.145942 | 8.144351 | 4.711132 | 1.99E-05 | 0.002726 | 2.708372 |
| ILMN_1792825 | 0.145859 | 7.809389 | 3.314944 | 0.00171  | 0.04894  | -1.38928 |
| ILMN_1676197 | 0.145858 | 10.08529 | 3.37078  | 0.001451 | 0.044664 | -1.24049 |
| ILMN_2065783 | -0.14557 | 7.062967 | -5.69413 | 6.49E-07 | 0.000263 | 5.902991 |
| ILMN_1770035 | 0.14557  | 7.938254 | 6.460908 | 4.16E-08 | 4.37E-05 | 8.468315 |
| ILMN_1721225 | 0.145562 | 8.673909 | 6.047725 | 1.84E-07 | 0.000106 | 7.081889 |
| ILMN_1790537 | -0.14556 | 8.683089 | -3.32668 | 0.001652 | 0.048147 | -1.35814 |
| ILMN_3227263 | -0.14552 | 7.69568  | -3.4178  | 0.001262 | 0.04129  | -1.11403 |
| ILMN_1741585 | 0.145515 | 6.201362 | 4.582443 | 3.08E-05 | 0.003583 | 2.304029 |
| ILMN_1767658 | 0.14546  | 8.743809 | 4.248171 | 9.36E-05 | 0.007589 | 1.274661 |
| ILMN_2144573 | -0.14531 | 7.407936 | -6.93279 | 7.60E-09 | 1.75E-05 | 10.05492 |
| ILMN_1653133 | -0.14513 | 8.267472 | -5.27953 | 2.80E-06 | 0.000773 | 4.53677  |
| ILMN_3265237 | -0.1451  | 7.012253 | -3.74245 | 0.00047  | 0.022309 | -0.21306 |
| ILMN_1696190 | 0.145057 | 7.341854 | 5.179287 | 3.98E-06 | 0.00094  | 4.209998 |
| ILMN_1661484 | 0.144923 | 6.477409 | 3.85755  | 0.000328 | 0.017766 | 0.117166 |
| ILMN_1718069 | -0.14488 | 9.717053 | -3.65846 | 0.00061  | 0.026644 | -0.4506  |
| ILMN_1753885 | 0.144481 | 8.759723 | 5.668451 | 7.11E-07 | 0.000282 | 5.81779  |
| ILMN_3303673 | -0.14438 | 7.409118 | -3.84674 | 0.00034  | 0.018181 | 0.085922 |

|              |          |          |          |          |          |          |
|--------------|----------|----------|----------|----------|----------|----------|
| ILMN_1728972 | 0.144304 | 7.406871 | 4.051157 | 0.000177 | 0.011939 | 0.68413  |
| ILMN_1748077 | -0.14429 | 8.373019 | -4.28818 | 8.20E-05 | 0.006902 | 1.396141 |
| ILMN_1654488 | -0.14408 | 7.884099 | -4.0157  | 0.000199 | 0.012768 | 0.579259 |
| ILMN_1702073 | -0.14407 | 7.020506 | -5.35732 | 2.13E-06 | 0.000634 | 4.791413 |
| ILMN_1688642 | 0.143925 | 6.268217 | 3.549667 | 0.00085  | 0.03277  | -0.75375 |
| ILMN_2050255 | 0.143898 | 8.970775 | 5.739448 | 5.52E-07 | 0.000234 | 6.053507 |
| ILMN_1800311 | -0.14389 | 7.430698 | -4.45751 | 4.68E-05 | 0.004777 | 1.915581 |
| ILMN_1733863 | -0.14314 | 8.329745 | -3.33721 | 0.001602 | 0.047401 | -1.33014 |
| ILMN_1683533 | 0.143067 | 6.642611 | 4.441495 | 4.94E-05 | 0.004927 | 1.866095 |
| ILMN_1729142 | 0.143047 | 6.377382 | 3.366584 | 0.001469 | 0.044915 | -1.25173 |
| ILMN_1692754 | -0.14238 | 9.73637  | -3.57614 | 0.000784 | 0.031437 | -0.68046 |
| ILMN_2207393 | 0.142323 | 7.21087  | 4.884599 | 1.10E-05 | 0.00182  | 3.259567 |
| ILMN_1651228 | -0.14228 | 13.36566 | -6.97261 | 6.58E-09 | 1.62E-05 | 10.18869 |
| ILMN_1765770 | 0.14225  | 6.899082 | 3.377593 | 0.001422 | 0.044289 | -1.22223 |
| ILMN_1690610 | 0.142134 | 8.977126 | 4.69125  | 2.13E-05 | 0.002819 | 2.645638 |
| ILMN_1745784 | 0.141999 | 6.744723 | 3.693038 | 0.000548 | 0.024798 | -0.35316 |
| ILMN_1687857 | 0.141927 | 7.076059 | 3.472706 | 0.001072 | 0.03739  | -0.96499 |
| ILMN_3235808 | 0.141921 | 9.152855 | 4.948784 | 8.85E-06 | 0.001614 | 3.465161 |
| ILMN_1758173 | -0.14191 | 9.107964 | -4.68629 | 2.17E-05 | 0.002838 | 2.630005 |
| ILMN_1700306 | -0.14173 | 10.1864  | -3.66853 | 0.000591 | 0.025996 | -0.42225 |
| ILMN_1788547 | 0.14165  | 8.061504 | 3.807212 | 0.000384 | 0.019694 | -0.02791 |
| ILMN_1682935 | -0.1416  | 8.379604 | -4.12118 | 0.000141 | 0.010277 | 0.892533 |
| ILMN_1804329 | 0.141527 | 6.846296 | 4.673088 | 2.27E-05 | 0.00293  | 2.588413 |
| ILMN_1821473 | 0.14145  | 6.241595 | 3.751173 | 0.000458 | 0.021893 | -0.18822 |
| ILMN_1662426 | 0.141433 | 11.20601 | 4.307395 | 7.70E-05 | 0.006655 | 1.454646 |
| ILMN_1686152 | -0.14141 | 7.40316  | -4.08174 | 0.000161 | 0.011128 | 0.774952 |
| ILMN_1738263 | 0.141127 | 7.787818 | 4.006545 | 0.000205 | 0.012965 | 0.552263 |
| ILMN_1747744 | 0.141    | 7.483208 | 4.014795 | 0.000199 | 0.012768 | 0.576597 |
| ILMN_1666727 | 0.14088  | 7.476774 | 4.154949 | 0.000127 | 0.009421 | 0.99362  |
| ILMN_3204734 | 0.140815 | 9.880486 | 3.548605 | 0.000853 | 0.032839 | -0.75668 |
| ILMN_3219340 | 0.14081  | 12.83704 | 3.511005 | 0.000955 | 0.035028 | -0.86021 |
| ILMN_3246608 | 0.140682 | 6.307201 | 3.637203 | 0.000651 | 0.0277   | -0.51023 |
| ILMN_2175112 | -0.14064 | 6.505594 | -3.54106 | 0.000872 | 0.033133 | -0.7775  |
| ILMN_1761858 | 0.140603 | 8.379168 | 4.71024  | 2.00E-05 | 0.002726 | 2.705557 |
| ILMN_1654653 | 0.140549 | 7.652321 | 5.538333 | 1.13E-06 | 0.000389 | 5.387142 |
| ILMN_1786893 | 0.140339 | 9.273498 | 3.360402 | 0.001496 | 0.045325 | -1.26827 |
| ILMN_1741371 | -0.14018 | 6.492369 | -3.9852  | 0.000219 | 0.013631 | 0.489427 |
| ILMN_1715273 | -0.14017 | 9.627349 | -4.16998 | 0.000121 | 0.009087 | 1.038755 |
| ILMN_1669484 | 0.140056 | 9.247776 | 4.217714 | 0.000103 | 0.008241 | 1.18253  |
| ILMN_1689327 | 0.139804 | 11.86812 | 5.004905 | 7.29E-06 | 0.001422 | 3.645601 |
| ILMN_2407124 | 0.139741 | 6.874062 | 3.499223 | 0.00099  | 0.035741 | -0.89251 |
| ILMN_1737604 | -0.13969 | 7.910983 | -3.78866 | 0.000407 | 0.020302 | -0.08112 |
| ILMN_1798712 | 0.13965  | 6.692122 | 3.800621 | 0.000392 | 0.019868 | -0.04683 |
| ILMN_1765649 | 0.139577 | 7.80209  | 4.171214 | 0.00012  | 0.009073 | 1.04245  |
| ILMN_2333107 | -0.13944 | 8.586003 | -4.17249 | 0.00012  | 0.009055 | 1.046288 |
| ILMN_1772124 | 0.139399 | 7.905463 | 3.944809 | 0.000249 | 0.014858 | 0.370972 |
| ILMN_1712231 | -0.13929 | 9.444425 | -3.48691 | 0.001027 | 0.036495 | -0.92621 |
| ILMN_2387599 | 0.139277 | 11.77284 | 4.751618 | 1.74E-05 | 0.002466 | 2.836411 |
| ILMN_1804150 | -0.13909 | 9.13232  | -4.07502 | 0.000164 | 0.0113   | 0.754967 |
| ILMN_3224290 | 0.139012 | 9.645384 | 3.322847 | 0.001671 | 0.048443 | -1.36832 |
| ILMN_1697817 | -0.13895 | 7.647454 | -3.68422 | 0.000563 | 0.024994 | -0.37805 |
| ILMN_2364131 | 0.138816 | 8.838955 | 5.082808 | 5.57E-06 | 0.001214 | 3.897064 |
| ILMN_1690268 | 0.138808 | 9.935304 | 3.543485 | 0.000866 | 0.033093 | -0.77082 |
| ILMN_1660341 | 0.138728 | 8.027969 | 3.399388 | 0.001333 | 0.042678 | -1.16367 |

|              |          |          |          |          |          |          |
|--------------|----------|----------|----------|----------|----------|----------|
| ILMN_1702279 | 0.138561 | 7.827281 | 4.450664 | 4.79E-05 | 0.004816 | 1.894419 |
| ILMN_1729987 | 0.138557 | 8.692391 | 4.74791  | 1.76E-05 | 0.002487 | 2.824669 |
| ILMN_1722294 | -0.13824 | 7.407387 | -5.3076  | 2.54E-06 | 0.000718 | 4.628552 |
| ILMN_1673111 | 0.138104 | 9.131493 | 3.709858 | 0.00052  | 0.023987 | -0.30558 |
| ILMN_1698673 | -0.13809 | 7.12604  | -5.06507 | 5.92E-06 | 0.001252 | 3.839722 |
| ILMN_1701940 | 0.138073 | 7.001941 | 5.804244 | 4.38E-07 | 0.000194 | 6.269047 |
| ILMN_1811836 | -0.13804 | 8.139387 | -3.36865 | 0.00146  | 0.044826 | -1.24619 |
| ILMN_2369785 | 0.138024 | 12.81444 | 5.504852 | 1.27E-06 | 0.000411 | 5.27664  |
| ILMN_1727300 | 0.137983 | 7.468963 | 5.199442 | 3.71E-06 | 0.000899 | 4.275568 |
| ILMN_1755974 | 0.137799 | 7.42346  | 3.402648 | 0.00132  | 0.042432 | -1.15489 |
| ILMN_1814966 | 0.137439 | 7.410336 | 4.212699 | 0.000105 | 0.008346 | 1.167388 |
| ILMN_1747281 | -0.13743 | 7.329939 | -4.06427 | 0.00017  | 0.011592 | 0.723016 |
| ILMN_2124802 | 0.137381 | 5.790428 | 3.68987  | 0.000554 | 0.024798 | -0.36211 |
| ILMN_1755077 | -0.13733 | 11.37783 | -3.90675 | 0.000281 | 0.015911 | 0.2599   |
| ILMN_1752283 | 0.137263 | 7.497097 | 5.420497 | 1.71E-06 | 0.000522 | 4.998849 |
| ILMN_1803988 | -0.13717 | 10.12275 | -3.4947  | 0.001003 | 0.035992 | -0.90491 |
| ILMN_1718285 | 0.137054 | 6.144673 | 3.667849 | 0.000592 | 0.026018 | -0.42418 |
| ILMN_1815885 | 0.136963 | 6.751586 | 4.165045 | 0.000123 | 0.009166 | 1.023919 |
| ILMN_1676792 | 0.136934 | 12.62773 | 3.357984 | 0.001507 | 0.045529 | -1.27473 |
| ILMN_1718771 | -0.13689 | 6.72125  | -3.58077 | 0.000773 | 0.031105 | -0.6676  |
| ILMN_2337336 | 0.136858 | 6.485446 | 3.752413 | 0.000456 | 0.021839 | -0.18468 |
| ILMN_1724734 | 0.136772 | 6.443757 | 5.187953 | 3.86E-06 | 0.000918 | 4.238183 |
| ILMN_2317730 | 0.1365   | 7.618262 | 5.252908 | 3.08E-06 | 0.000792 | 4.449832 |
| ILMN_1795228 | -0.13648 | 11.03292 | -3.379   | 0.001416 | 0.044216 | -1.21846 |
| ILMN_1722426 | -0.13628 | 5.769089 | -4.36667 | 6.33E-05 | 0.005854 | 1.63585  |
| ILMN_1809957 | 0.136156 | 12.30113 | 7.000736 | 5.95E-09 | 1.58E-05 | 10.28316 |
| ILMN_1804419 | -0.13615 | 6.165495 | -3.50775 | 0.000964 | 0.035112 | -0.86915 |
| ILMN_1794781 | 0.13611  | 6.908979 | 5.276932 | 2.83E-06 | 0.000774 | 4.528282 |
| ILMN_2373266 | -0.13596 | 8.809098 | -4.96026 | 8.50E-06 | 0.001593 | 3.502003 |
| ILMN_1702835 | -0.13592 | 9.257488 | -4.0138  | 0.0002   | 0.012779 | 0.573656 |
| ILMN_1653501 | 0.135578 | 5.587015 | 5.597469 | 9.14E-07 | 0.000335 | 5.582632 |
| ILMN_2347068 | -0.13555 | 9.922888 | -3.80921 | 0.000382 | 0.019658 | -0.02216 |
| ILMN_2159453 | -0.13552 | 8.276362 | -3.85559 | 0.00033  | 0.017848 | 0.111507 |
| ILMN_3288755 | 0.135497 | 6.588679 | 3.803443 | 0.000389 | 0.01978  | -0.03873 |
| ILMN_3180557 | 0.135472 | 6.933027 | 5.116973 | 4.94E-06 | 0.001114 | 4.007695 |
| ILMN_1670322 | -0.13541 | 7.840022 | -3.88385 | 0.000302 | 0.016653 | 0.19335  |
| ILMN_1752884 | 0.135355 | 6.1438   | 3.553784 | 0.000839 | 0.032546 | -0.74237 |
| ILMN_1796099 | 0.135193 | 7.155118 | 3.460599 | 0.001111 | 0.038039 | -0.99798 |
| ILMN_1900270 | -0.13517 | 6.401475 | -3.37683 | 0.001425 | 0.044289 | -1.22429 |
| ILMN_1751615 | -0.13509 | 8.943403 | -3.4785  | 0.001053 | 0.036933 | -0.94918 |
| ILMN_1794213 | 0.134901 | 6.118721 | 3.477899 | 0.001055 | 0.036962 | -0.95083 |
| ILMN_1657204 | 0.134887 | 11.45826 | 3.508431 | 0.000962 | 0.035111 | -0.86727 |
| ILMN_1758906 | -0.13487 | 9.010846 | -5.70438 | 6.26E-07 | 0.000257 | 5.937022 |
| ILMN_1761069 | -0.13487 | 7.418122 | -3.54499 | 0.000862 | 0.033017 | -0.76667 |
| ILMN_1812327 | -0.13486 | 6.350576 | -4.3575  | 6.53E-05 | 0.005954 | 1.607751 |
| ILMN_1731193 | 0.134828 | 6.411773 | 5.253807 | 3.07E-06 | 0.000792 | 4.452766 |
| ILMN_1703142 | -0.13471 | 6.363091 | -4.2932  | 8.07E-05 | 0.006853 | 1.411394 |
| ILMN_1658807 | -0.13456 | 6.922589 | -4.04272 | 0.000182 | 0.01217  | 0.659137 |
| ILMN_2402806 | 0.134361 | 8.329239 | 4.605529 | 2.85E-05 | 0.003413 | 2.376263 |
| ILMN_2403555 | 0.134145 | 6.899727 | 3.892628 | 0.000294 | 0.016316 | 0.218845 |
| ILMN_1787932 | -0.1339  | 6.155758 | -3.49438 | 0.001004 | 0.035992 | -0.90576 |
| ILMN_1658015 | -0.13354 | 7.671465 | -3.86222 | 0.000323 | 0.01759  | 0.130678 |
| ILMN_1653599 | -0.13353 | 10.79695 | -3.52722 | 0.000909 | 0.034118 | -0.81565 |
| ILMN_2167922 | 0.133517 | 11.34824 | 4.785775 | 1.55E-05 | 0.002232 | 2.944725 |

|              |          |          |          |          |          |          |
|--------------|----------|----------|----------|----------|----------|----------|
| ILMN_1777444 | -0.1335  | 7.396279 | -4.67071 | 2.29E-05 | 0.002932 | 2.580926 |
| ILMN_1656066 | 0.133497 | 9.395813 | 4.946671 | 8.91E-06 | 0.001617 | 3.458379 |
| ILMN_1778803 | -0.13348 | 8.24874  | -4.93586 | 9.25E-06 | 0.001652 | 3.423682 |
| ILMN_1792078 | 0.133274 | 9.804828 | 4.276182 | 8.53E-05 | 0.007124 | 1.359651 |
| ILMN_1654064 | -0.13315 | 7.089103 | -4.65043 | 2.45E-05 | 0.003069 | 2.517138 |
| ILMN_1668834 | -0.13314 | 6.53654  | -3.69165 | 0.000551 | 0.024798 | -0.35708 |
| ILMN_1808391 | -0.13303 | 5.873943 | -3.87471 | 0.000311 | 0.016991 | 0.166848 |
| ILMN_1758633 | 0.132913 | 8.386412 | 3.498575 | 0.000991 | 0.035741 | -0.89429 |
| ILMN_1812461 | 0.132912 | 6.393518 | 4.848624 | 1.25E-05 | 0.001927 | 3.144711 |
| ILMN_1721704 | -0.13291 | 9.435152 | -3.37876 | 0.001417 | 0.044216 | -1.21911 |
| ILMN_1757847 | -0.13289 | 7.089486 | -4.88867 | 1.09E-05 | 0.001811 | 3.272596 |
| ILMN_2063925 | 0.132751 | 8.524528 | 4.000071 | 0.000209 | 0.013188 | 0.533188 |
| ILMN_1775486 | -0.1327  | 5.641129 | -3.63525 | 0.000655 | 0.027737 | -0.51569 |
| ILMN_1806809 | 0.132642 | 6.996511 | 3.6185   | 0.000689 | 0.028788 | -0.56254 |
| ILMN_1808860 | -0.13262 | 8.62686  | -5.00737 | 7.23E-06 | 0.001422 | 3.65353  |
| ILMN_1770977 | -0.13243 | 8.74774  | -4.79909 | 1.48E-05 | 0.002143 | 2.987025 |
| ILMN_1769734 | -0.13238 | 9.050755 | -3.89813 | 0.000289 | 0.016159 | 0.234841 |
| ILMN_1651886 | 0.132079 | 9.567376 | 4.03667  | 0.000186 | 0.012245 | 0.64123  |
| ILMN_2350574 | 0.132019 | 7.019527 | 3.376672 | 0.001426 | 0.044289 | -1.2247  |
| ILMN_1734827 | 0.131914 | 6.450167 | 4.250008 | 9.30E-05 | 0.007579 | 1.280227 |
| ILMN_1715969 | 0.131778 | 7.124269 | 4.288041 | 8.21E-05 | 0.006902 | 1.395708 |
| ILMN_1793033 | 0.131519 | 7.364432 | 4.025448 | 0.000193 | 0.012526 | 0.608052 |
| ILMN_1678052 | -0.13137 | 7.657149 | -3.31395 | 0.001715 | 0.04894  | -1.39193 |
| ILMN_2176037 | -0.13126 | 8.145888 | -6.12338 | 1.40E-07 | 9.11E-05 | 7.335231 |
| ILMN_1653896 | 0.131024 | 6.707074 | 3.563268 | 0.000815 | 0.032056 | -0.71613 |
| ILMN_1761722 | 0.130575 | 6.721795 | 4.505772 | 3.99E-05 | 0.004255 | 2.065141 |
| ILMN_1784436 | 0.130122 | 7.171081 | 3.727791 | 0.000492 | 0.023093 | -0.25473 |
| ILMN_1747223 | -0.13008 | 8.365961 | -3.82273 | 0.000366 | 0.019071 | 0.016703 |
| ILMN_1760143 | 0.129678 | 10.37174 | 4.386412 | 5.93E-05 | 0.005634 | 1.696448 |
| ILMN_2411794 | 0.129596 | 8.508565 | 4.641216 | 2.53E-05 | 0.003133 | 2.488187 |
| ILMN_1700337 | 0.129543 | 7.679403 | 3.793528 | 0.000401 | 0.020087 | -0.06717 |
| ILMN_1702866 | 0.12942  | 5.750363 | 5.420036 | 1.71E-06 | 0.000522 | 4.997331 |
| ILMN_1748894 | 0.129285 | 8.536682 | 3.763282 | 0.000441 | 0.021449 | -0.15369 |
| ILMN_1764323 | -0.1289  | 9.198453 | -4.58203 | 3.09E-05 | 0.003583 | 2.302727 |
| ILMN_2386100 | 0.128884 | 9.046575 | 3.710598 | 0.000519 | 0.023964 | -0.30349 |
| ILMN_1676759 | 0.128789 | 7.911027 | 4.310859 | 7.61E-05 | 0.006596 | 1.465206 |
| ILMN_1771824 | 0.128721 | 6.442188 | 5.134613 | 4.65E-06 | 0.001068 | 4.064897 |
| ILMN_1678949 | 0.128575 | 7.116892 | 4.427449 | 5.18E-05 | 0.005085 | 1.822753 |
| ILMN_2174081 | 0.128539 | 7.115872 | 3.350455 | 0.001541 | 0.046176 | -1.29483 |
| ILMN_1697348 | 0.128284 | 8.438112 | 3.838904 | 0.000348 | 0.018491 | 0.063311 |
| ILMN_1693145 | 0.128204 | 11.4118  | 3.904125 | 0.000283 | 0.015964 | 0.252274 |
| ILMN_1714364 | -0.12809 | 11.31818 | -3.66388 | 0.0006   | 0.026271 | -0.43535 |
| ILMN_1672947 | -0.12781 | 9.153308 | -3.5133  | 0.000948 | 0.034911 | -0.85392 |
| ILMN_2171295 | 0.127769 | 7.261982 | 3.508105 | 0.000963 | 0.035111 | -0.86816 |
| ILMN_1773002 | -0.12775 | 7.412498 | -3.40056 | 0.001329 | 0.042649 | -1.1605  |
| ILMN_1651799 | -0.12774 | 11.70725 | -3.60703 | 0.000714 | 0.029542 | -0.59456 |
| ILMN_1754727 | -0.12763 | 6.925514 | -4.21813 | 0.000103 | 0.008241 | 1.183775 |
| ILMN_1747183 | 0.127496 | 6.988828 | 3.984996 | 0.000219 | 0.013631 | 0.488825 |
| ILMN_1770911 | 0.127495 | 6.857643 | 4.33939  | 6.93E-05 | 0.006223 | 1.55233  |
| ILMN_1697735 | 0.127458 | 9.890322 | 5.256236 | 3.04E-06 | 0.000792 | 4.460696 |
| ILMN_1677402 | -0.12735 | 6.360593 | -3.34551 | 0.001563 | 0.0467   | -1.30803 |
| ILMN_1679195 | 0.127276 | 11.71869 | 4.131799 | 0.000137 | 0.010026 | 0.924271 |
| ILMN_1741985 | -0.12727 | 6.556949 | -4.70614 | 2.03E-05 | 0.002732 | 2.692598 |
| ILMN_1731354 | 0.127163 | 9.639258 | 4.179878 | 0.000117 | 0.008879 | 1.068496 |

|              |          |          |          |          |          |          |
|--------------|----------|----------|----------|----------|----------|----------|
| ILMN_1802646 | 0.127105 | 5.629979 | 3.326603 | 0.001652 | 0.048147 | -1.35834 |
| ILMN_3233179 | 0.127101 | 7.616117 | 3.306308 | 0.001754 | 0.04984  | -1.41216 |
| ILMN_1750051 | 0.126996 | 6.800724 | 4.450784 | 4.79E-05 | 0.004816 | 1.89479  |
| ILMN_1778255 | 0.126946 | 7.104808 | 3.749329 | 0.00046  | 0.021988 | -0.19347 |
| ILMN_1671568 | -0.12678 | 8.992622 | -3.64606 | 0.000633 | 0.027241 | -0.48541 |
| ILMN_1741942 | 0.126718 | 9.043092 | 3.47913  | 0.001051 | 0.036901 | -0.94747 |
| ILMN_1674421 | 0.126449 | 8.956569 | 3.702633 | 0.000532 | 0.024369 | -0.32603 |
| ILMN_1775522 | 0.126307 | 9.771732 | 3.339125 | 0.001593 | 0.047297 | -1.32504 |
| ILMN_1769158 | 0.126127 | 8.019062 | 3.637174 | 0.000651 | 0.0277   | -0.51031 |
| ILMN_2328378 | -0.12612 | 7.923599 | -3.30907 | 0.001739 | 0.049521 | -1.40485 |
| ILMN_1784352 | -0.12607 | 8.794541 | -3.97738 | 0.000225 | 0.013825 | 0.466443 |
| ILMN_1687351 | -0.12599 | 7.549386 | -4.38386 | 5.98E-05 | 0.005651 | 1.688604 |
| ILMN_1784540 | -0.12578 | 8.812635 | -3.45349 | 0.001135 | 0.038458 | -1.0173  |
| ILMN_1787280 | 0.125731 | 8.156233 | 3.817671 | 0.000372 | 0.019231 | 0.002154 |
| ILMN_2363591 | -0.12554 | 9.224569 | -4.20682 | 0.000107 | 0.008446 | 1.149656 |
| ILMN_2369221 | -0.12552 | 5.999184 | -3.50327 | 0.000978 | 0.035401 | -0.88143 |
| ILMN_1771966 | 0.125184 | 10.57052 | 3.479415 | 0.00105  | 0.036901 | -0.94669 |
| ILMN_1727001 | 0.124946 | 7.703579 | 3.795114 | 0.000399 | 0.020061 | -0.06262 |
| ILMN_1757914 | 0.124906 | 9.621177 | 3.327122 | 0.00165  | 0.048147 | -1.35696 |
| ILMN_2169761 | -0.1249  | 7.763599 | -3.44171 | 0.001176 | 0.039438 | -1.04929 |
| ILMN_2225061 | 0.124888 | 5.399499 | 4.842531 | 1.27E-05 | 0.001949 | 3.125284 |
| ILMN_1733875 | 0.124827 | 7.811225 | 3.929631 | 0.000261 | 0.015308 | 0.326616 |
| ILMN_1774589 | 0.124805 | 6.94714  | 3.755986 | 0.000451 | 0.021749 | -0.1745  |
| ILMN_1669268 | -0.12477 | 7.286341 | -3.51944 | 0.000931 | 0.034679 | -0.83703 |
| ILMN_2203896 | -0.12468 | 7.439711 | -3.5293  | 0.000904 | 0.033963 | -0.8099  |
| ILMN_1665095 | 0.124573 | 7.455196 | 3.779234 | 0.00042  | 0.020723 | -0.1081  |
| ILMN_1657631 | -0.12449 | 6.994022 | -4.51994 | 3.80E-05 | 0.004109 | 2.109171 |
| ILMN_2182704 | -0.12446 | 9.554422 | -4.31169 | 7.59E-05 | 0.006596 | 1.467727 |
| ILMN_1731165 | 0.12446  | 5.676588 | 3.369585 | 0.001456 | 0.044742 | -1.24369 |
| ILMN_1729281 | 0.12443  | 7.419073 | 4.537472 | 3.58E-05 | 0.003963 | 2.163721 |
| ILMN_1703316 | 0.124408 | 7.538053 | 3.574074 | 0.000789 | 0.031452 | -0.68619 |
| ILMN_1795639 | 0.124236 | 9.320822 | 3.676455 | 0.000577 | 0.025468 | -0.39995 |
| ILMN_2047676 | -0.12423 | 7.323166 | -3.3661  | 0.001471 | 0.044915 | -1.25303 |
| ILMN_1694759 | 0.124112 | 7.99306  | 4.184746 | 0.000115 | 0.008798 | 1.08314  |
| ILMN_1711823 | 0.124058 | 8.071418 | 3.757676 | 0.000449 | 0.021665 | -0.16968 |
| ILMN_1755664 | 0.123941 | 6.608051 | 5.236112 | 3.26E-06 | 0.000815 | 4.395042 |
| ILMN_1673522 | -0.12384 | 8.374233 | -3.57427 | 0.000789 | 0.031452 | -0.68565 |
| ILMN_1733511 | 0.123742 | 9.79902  | 4.535455 | 3.61E-05 | 0.003969 | 2.157442 |
| ILMN_1678966 | 0.123701 | 11.14048 | 3.364348 | 0.001479 | 0.044998 | -1.25771 |
| ILMN_1813657 | 0.123648 | 7.18278  | 4.023809 | 0.000194 | 0.012553 | 0.60321  |
| ILMN_1779163 | -0.12359 | 8.642296 | -3.88734 | 0.000299 | 0.016537 | 0.203479 |
| ILMN_1678054 | -0.12351 | 7.81865  | -3.37466 | 0.001434 | 0.044352 | -1.23011 |
| ILMN_1778488 | -0.12336 | 7.39079  | -4.53498 | 3.61E-05 | 0.003969 | 2.155951 |
| ILMN_2167416 | -0.12295 | 7.18592  | -3.62304 | 0.00068  | 0.028507 | -0.54985 |
| ILMN_2367258 | 0.122871 | 5.760206 | 3.375038 | 0.001433 | 0.044346 | -1.22908 |
| ILMN_1728626 | 0.122818 | 8.320201 | 3.908833 | 0.000279 | 0.015832 | 0.265979 |
| ILMN_1759595 | 0.122777 | 7.280271 | 5.690125 | 6.58E-07 | 0.000264 | 5.8897   |
| ILMN_1740197 | 0.122742 | 6.46239  | 4.819811 | 1.38E-05 | 0.002038 | 3.052922 |
| ILMN_1672843 | -0.12274 | 8.3593   | -4.0634  | 0.00017  | 0.011592 | 0.720448 |
| ILMN_2219134 | -0.1227  | 12.86068 | -4.2054  | 0.000108 | 0.00845  | 1.145364 |
| ILMN_1746426 | 0.122563 | 9.547126 | 4.438506 | 4.99E-05 | 0.004947 | 1.856869 |
| ILMN_1743662 | -0.12256 | 6.300212 | -4.60933 | 2.82E-05 | 0.003382 | 2.388183 |
| ILMN_1706779 | 0.122445 | 7.750245 | 3.382088 | 0.001403 | 0.043982 | -1.21017 |
| ILMN_1693004 | 0.122432 | 7.82199  | 3.322351 | 0.001673 | 0.048473 | -1.36963 |



|              |          |          |          |          |          |          |
|--------------|----------|----------|----------|----------|----------|----------|
| ILMN_1802338 | -0.1224  | 6.528872 | -4.90325 | 1.03E-05 | 0.001773 | 3.319217 |
| ILMN_1661170 | 0.122363 | 11.5488  | 4.063984 | 0.00017  | 0.011592 | 0.722178 |
| ILMN_1665300 | -0.12235 | 7.015094 | -5.46894 | 1.44E-06 | 0.000456 | 5.158272 |
| ILMN_2063500 | 0.122297 | 7.628167 | 4.613823 | 2.77E-05 | 0.003342 | 2.402245 |
| ILMN_1679483 | 0.122276 | 8.198779 | 3.945152 | 0.000249 | 0.014858 | 0.371974 |
| ILMN_1757343 | 0.122275 | 10.7549  | 4.379265 | 6.07E-05 | 0.00571  | 1.674501 |
| ILMN_1774196 | 0.122274 | 9.275008 | 3.926258 | 0.000264 | 0.015412 | 0.316772 |
| ILMN_1674661 | -0.12214 | 10.48293 | -3.37518 | 0.001432 | 0.044346 | -1.22869 |
| ILMN_1778240 | 0.122038 | 8.455276 | 3.534691 | 0.000889 | 0.033576 | -0.79507 |
| ILMN_1663042 | 0.122013 | 9.702589 | 3.683455 | 0.000565 | 0.025005 | -0.38021 |
| ILMN_1670948 | 0.121991 | 8.812808 | 4.069337 | 0.000167 | 0.01144  | 0.738072 |
| ILMN_1722089 | -0.12197 | 7.619406 | -3.68774 | 0.000557 | 0.02482  | -0.36812 |
| ILMN_2358914 | 0.121956 | 6.50809  | 4.187644 | 0.000114 | 0.008774 | 1.091863 |
| ILMN_1704247 | -0.12189 | 6.781117 | -3.95792 | 0.000239 | 0.0144   | 0.409355 |
| ILMN_1723467 | -0.12185 | 11.41865 | -3.99908 | 0.00021  | 0.013206 | 0.530273 |
| ILMN_2340721 | -0.12177 | 8.480932 | -4.35288 | 6.63E-05 | 0.00603  | 1.593605 |
| ILMN_1784227 | 0.121486 | 8.89894  | 4.863952 | 1.18E-05 | 0.001881 | 3.193614 |
| ILMN_1805344 | -0.12144 | 11.86283 | -3.51803 | 0.000935 | 0.034774 | -0.8409  |
| ILMN_1823112 | 0.121208 | 6.26093  | 4.649588 | 2.46E-05 | 0.003069 | 2.514488 |
| ILMN_1803773 | 0.121198 | 6.123491 | 4.453176 | 4.75E-05 | 0.004816 | 1.902183 |
| ILMN_1801767 | -0.12117 | 6.987505 | -3.32824 | 0.001644 | 0.048047 | -1.35399 |
| ILMN_1711909 | 0.121098 | 7.403274 | 3.420775 | 0.001251 | 0.041004 | -1.10598 |
| ILMN_3240187 | 0.12094  | 9.69429  | 4.07302  | 0.000165 | 0.01135  | 0.749013 |
| ILMN_1793743 | -0.1209  | 8.542338 | -4.04217 | 0.000183 | 0.01217  | 0.657517 |
| ILMN_1686135 | -0.12087 | 8.359989 | -3.38268 | 0.001401 | 0.043982 | -1.20858 |
| ILMN_1655952 | 0.120472 | 9.16614  | 3.733743 | 0.000483 | 0.022857 | -0.23782 |
| ILMN_1801600 | 0.120299 | 8.147344 | 3.461924 | 0.001107 | 0.037926 | -0.99437 |
| ILMN_1708787 | 0.120235 | 6.52756  | 3.567809 | 0.000804 | 0.031909 | -0.70356 |
| ILMN_1755850 | 0.120167 | 5.583099 | 3.512599 | 0.00095  | 0.034911 | -0.85583 |
| ILMN_2374115 | -0.12016 | 8.599269 | -3.51413 | 0.000946 | 0.034911 | -0.85164 |
| ILMN_1706960 | -0.12005 | 6.299473 | -3.76875 | 0.000433 | 0.021229 | -0.13808 |
| ILMN_1783702 | -0.11993 | 7.721322 | -3.36173 | 0.00149  | 0.045292 | -1.26471 |
| ILMN_1768194 | -0.11992 | 7.726417 | -4.63798 | 2.56E-05 | 0.003136 | 2.478018 |
| ILMN_1740430 | 0.119675 | 6.808733 | 4.413604 | 5.42E-05 | 0.005269 | 1.780086 |
| ILMN_1665049 | -0.11963 | 8.704278 | -4.53736 | 3.59E-05 | 0.003963 | 2.16338  |
| ILMN_1712944 | -0.11962 | 9.416916 | -3.82354 | 0.000365 | 0.019051 | 0.019052 |
| ILMN_1734231 | 0.119445 | 9.752719 | 3.701724 | 0.000534 | 0.024369 | -0.3286  |
| ILMN_1815656 | 0.119427 | 8.904437 | 3.467802 | 0.001087 | 0.037641 | -0.97836 |
| ILMN_1754865 | 0.119325 | 9.424259 | 4.313832 | 7.54E-05 | 0.006581 | 1.474273 |
| ILMN_2392080 | -0.11932 | 7.594627 | -3.60323 | 0.000722 | 0.029718 | -0.60514 |
| ILMN_1695797 | 0.119236 | 8.588752 | 3.496548 | 0.000998 | 0.03586  | -0.89984 |
| ILMN_1759991 | 0.11923  | 8.673025 | 4.438303 | 4.99E-05 | 0.004947 | 1.856242 |
| ILMN_1745513 | 0.11922  | 7.305104 | 3.396457 | 0.001345 | 0.042812 | -1.17156 |
| ILMN_1707199 | 0.119147 | 7.796457 | 4.3319   | 7.10E-05 | 0.006329 | 1.529435 |
| ILMN_1738103 | 0.119133 | 9.375674 | 3.375861 | 0.001429 | 0.044346 | -1.22688 |
| ILMN_1698015 | 0.118924 | 6.189212 | 4.514407 | 3.87E-05 | 0.004147 | 2.091968 |
| ILMN_3261111 | 0.118895 | 6.0825   | 4.198557 | 0.00011  | 0.008582 | 1.124735 |
| ILMN_1684591 | 0.118873 | 7.380275 | 4.005224 | 0.000205 | 0.012996 | 0.548372 |
| ILMN_1692123 | 0.118778 | 6.494237 | 4.09672  | 0.000153 | 0.010842 | 0.819534 |
| ILMN_1762439 | -0.11863 | 7.006073 | -3.75867 | 0.000447 | 0.021629 | -0.16685 |
| ILMN_3256325 | 0.118552 | 7.767774 | 3.36104  | 0.001493 | 0.045319 | -1.26656 |
| ILMN_1844692 | -0.1182  | 8.90904  | -3.34145 | 0.001582 | 0.047137 | -1.31883 |
| ILMN_1671619 | 0.117859 | 6.073866 | 4.441219 | 4.94E-05 | 0.004927 | 1.865243 |
| ILMN_2405009 | -0.11777 | 9.694206 | -3.50819 | 0.000963 | 0.035111 | -0.86793 |

|              |          |          |          |          |          |          |
|--------------|----------|----------|----------|----------|----------|----------|
| ILMN_1799487 | -0.11774 | 5.456221 | -4.39653 | 5.74E-05 | 0.005479 | 1.727558 |
| ILMN_1657129 | -0.11769 | 8.061768 | -3.72596 | 0.000495 | 0.023192 | -0.25992 |
| ILMN_3237209 | 0.117677 | 6.406315 | 4.673235 | 2.27E-05 | 0.00293  | 2.588875 |
| ILMN_1681135 | 0.117592 | 6.153082 | 5.421089 | 1.71E-06 | 0.000522 | 5.000794 |
| ILMN_1743806 | -0.11757 | 7.173525 | -3.57027 | 0.000798 | 0.031744 | -0.69673 |
| ILMN_1700733 | -0.11753 | 8.020116 | -3.83494 | 0.000352 | 0.018636 | 0.05187  |
| ILMN_1720850 | -0.11746 | 7.84599  | -4.18015 | 0.000117 | 0.008879 | 1.069303 |
| ILMN_1790461 | -0.1173  | 10.46785 | -3.99434 | 0.000213 | 0.01331  | 0.516323 |
| ILMN_2389155 | -0.11713 | 9.368498 | -4.20725 | 0.000107 | 0.008446 | 1.150944 |
| ILMN_1720838 | -0.11711 | 10.69731 | -4.52452 | 3.74E-05 | 0.004072 | 2.12341  |
| ILMN_1671603 | -0.11707 | 9.146976 | -5.97435 | 2.39E-07 | 0.000125 | 6.836506 |
| ILMN_2197247 | 0.116777 | 7.95462  | 4.181033 | 0.000116 | 0.008879 | 1.07197  |
| ILMN_1702198 | 0.116701 | 7.340192 | 4.470886 | 4.48E-05 | 0.00461  | 1.956968 |
| ILMN_2278819 | -0.11652 | 6.91849  | -4.11815 | 0.000143 | 0.010347 | 0.883455 |
| ILMN_1808047 | -0.1164  | 6.950668 | -3.48362 | 0.001037 | 0.036654 | -0.93521 |
| ILMN_1705682 | 0.116254 | 5.980359 | 3.780066 | 0.000418 | 0.020699 | -0.10572 |
| ILMN_1688011 | 0.116192 | 7.523639 | 4.35094  | 6.67E-05 | 0.006053 | 1.58767  |
| ILMN_2175114 | -0.11611 | 5.816607 | -3.64742 | 0.000631 | 0.027218 | -0.48158 |
| ILMN_3238269 | 0.116015 | 8.443412 | 4.164159 | 0.000123 | 0.009166 | 1.021257 |
| ILMN_1737611 | 0.115991 | 6.66995  | 4.695003 | 2.11E-05 | 0.002794 | 2.657472 |
| ILMN_1730077 | 0.115958 | 8.436897 | 4.598678 | 2.92E-05 | 0.003457 | 2.354813 |
| ILMN_1781803 | 0.115932 | 6.925614 | 4.085971 | 0.000159 | 0.011033 | 0.787527 |
| ILMN_1671932 | 0.11583  | 8.787435 | 4.198882 | 0.00011  | 0.008582 | 1.125713 |
| ILMN_1813344 | 0.11573  | 8.433726 | 3.326378 | 0.001653 | 0.048147 | -1.35894 |
| ILMN_2053567 | 0.115699 | 7.403784 | 4.117346 | 0.000143 | 0.010352 | 0.881067 |
| ILMN_3307786 | 0.115436 | 7.343689 | 4.093486 | 0.000155 | 0.010908 | 0.809901 |
| ILMN_3225300 | -0.11543 | 9.027645 | -3.9325  | 0.000259 | 0.015239 | 0.335007 |
| ILMN_2381121 | 0.115375 | 7.002543 | 3.833445 | 0.000354 | 0.018691 | 0.04757  |
| ILMN_1722522 | -0.11534 | 7.330681 | -4.62744 | 2.65E-05 | 0.003215 | 2.444955 |
| ILMN_1695311 | -0.11528 | 6.497101 | -3.64322 | 0.000639 | 0.027399 | -0.49336 |
| ILMN_1748057 | -0.11523 | 6.078795 | -4.21727 | 0.000104 | 0.008241 | 1.181188 |
| ILMN_1791097 | 0.115081 | 7.561567 | 3.41466  | 0.001274 | 0.04148  | -1.1225  |
| ILMN_1683916 | -0.11502 | 8.270671 | -3.54254 | 0.000868 | 0.033115 | -0.77343 |
| ILMN_1710408 | -0.11455 | 6.543896 | -3.39498 | 0.001351 | 0.042894 | -1.17553 |
| ILMN_1819783 | -0.11444 | 7.253281 | -3.31477 | 0.001711 | 0.04894  | -1.38973 |
| ILMN_1768930 | 0.114359 | 10.04637 | 3.760925 | 0.000444 | 0.02153  | -0.16041 |
| ILMN_1654289 | 0.114309 | 8.02617  | 3.924092 | 0.000266 | 0.015492 | 0.310451 |
| ILMN_2399264 | 0.114299 | 6.216862 | 4.113955 | 0.000145 | 0.010423 | 0.87094  |
| ILMN_1781791 | -0.11418 | 7.244427 | -3.72503 | 0.000497 | 0.023197 | -0.26258 |
| ILMN_1737360 | 0.114132 | 5.933497 | 3.80403  | 0.000388 | 0.01978  | -0.03704 |
| ILMN_1809488 | -0.11395 | 10.62056 | -3.56376 | 0.000814 | 0.032056 | -0.71477 |
| ILMN_1729314 | -0.11392 | 6.349821 | -3.54129 | 0.000872 | 0.033133 | -0.77686 |
| ILMN_1692748 | -0.1139  | 7.544309 | -3.48949 | 0.001019 | 0.036364 | -0.91917 |
| ILMN_3249742 | 0.113839 | 6.037584 | 3.72818  | 0.000492 | 0.023093 | -0.25362 |
| ILMN_1669308 | 0.113745 | 7.241029 | 3.979611 | 0.000223 | 0.013776 | 0.472999 |
| ILMN_1750636 | 0.113644 | 11.9311  | 3.359878 | 0.001498 | 0.045355 | -1.26966 |
| ILMN_2356955 | -0.11327 | 6.470147 | -3.31823 | 0.001693 | 0.048774 | -1.38056 |
| ILMN_2043109 | 0.113253 | 7.624979 | 4.264225 | 8.88E-05 | 0.007286 | 1.32334  |
| ILMN_1659800 | -0.11322 | 5.620496 | -3.69026 | 0.000553 | 0.024798 | -0.36101 |
| ILMN_1806010 | -0.11303 | 6.587764 | -4.17866 | 0.000117 | 0.008895 | 1.064842 |
| ILMN_1758339 | 0.113025 | 6.375826 | 3.350225 | 0.001542 | 0.046176 | -1.29545 |
| ILMN_1679324 | 0.113    | 9.648037 | 3.529087 | 0.000904 | 0.033963 | -0.8105  |
| ILMN_1658290 | 0.112868 | 7.569182 | 4.086318 | 0.000158 | 0.011033 | 0.788559 |
| ILMN_1778242 | 0.11285  | 10.31384 | 3.483068 | 0.001039 | 0.036654 | -0.93671 |

|              |          |          |          |          |          |          |
|--------------|----------|----------|----------|----------|----------|----------|
| ILMN_1662161 | 0.112786 | 6.398688 | 4.035004 | 0.000187 | 0.012264 | 0.636302 |
| ILMN_1693438 | -0.11276 | 7.133441 | -3.91728 | 0.000272 | 0.015534 | 0.290582 |
| ILMN_1658677 | 0.11269  | 5.559248 | 3.803652 | 0.000389 | 0.01978  | -0.03813 |
| ILMN_1738420 | 0.11269  | 5.652472 | 4.185911 | 0.000115 | 0.008798 | 1.086646 |
| ILMN_1657058 | -0.11248 | 5.838526 | -3.97251 | 0.000228 | 0.013966 | 0.452142 |
| ILMN_1664025 | 0.112449 | 6.58128  | 3.455467 | 0.001128 | 0.038349 | -1.01194 |
| ILMN_1656194 | -0.11224 | 5.805572 | -4.36298 | 6.41E-05 | 0.005894 | 1.62456  |
| ILMN_2397024 | -0.11204 | 9.407902 | -3.69263 | 0.000549 | 0.024798 | -0.35431 |
| ILMN_1675577 | 0.111843 | 7.180331 | 4.477396 | 4.38E-05 | 0.004538 | 1.977129 |
| ILMN_1772677 | 0.111783 | 8.256293 | 4.271424 | 8.67E-05 | 0.007193 | 1.345196 |
| ILMN_1811560 | 0.111641 | 8.083334 | 3.801635 | 0.000391 | 0.019839 | -0.04392 |
| ILMN_1812441 | 0.111605 | 8.001096 | 3.546789 | 0.000857 | 0.032877 | -0.7617  |
| ILMN_2198393 | -0.11151 | 8.687471 | -3.77515 | 0.000425 | 0.020898 | -0.11977 |
| ILMN_1671326 | 0.111497 | 6.730258 | 3.788575 | 0.000407 | 0.020302 | -0.08136 |
| ILMN_2360784 | 0.111433 | 9.320021 | 3.321264 | 0.001678 | 0.048546 | -1.37252 |
| ILMN_1798164 | -0.1114  | 9.01414  | -3.44927 | 0.001149 | 0.038809 | -1.02878 |
| ILMN_1683096 | -0.11129 | 7.129923 | -3.55769 | 0.000829 | 0.032309 | -0.73158 |
| ILMN_1779639 | -0.11116 | 6.887925 | -3.53881 | 0.000878 | 0.033234 | -0.78372 |
| ILMN_1676955 | -0.11113 | 7.835196 | -3.78111 | 0.000417 | 0.020661 | -0.10274 |
| ILMN_1790782 | -0.11093 | 7.497588 | -3.85222 | 0.000334 | 0.01801  | 0.101749 |
| ILMN_1711102 | -0.11092 | 7.192119 | -3.75296 | 0.000455 | 0.021837 | -0.18311 |
| ILMN_2281186 | -0.11091 | 5.81226  | -4.4646  | 4.57E-05 | 0.00468  | 1.937528 |
| ILMN_2352121 | -0.11081 | 9.799415 | -3.70529 | 0.000528 | 0.024295 | -0.31851 |
| ILMN_3251742 | 0.110777 | 7.084747 | 3.483081 | 0.001039 | 0.036654 | -0.93668 |
| ILMN_1691341 | 0.110749 | 6.484653 | 3.727812 | 0.000492 | 0.023093 | -0.25467 |
| ILMN_1687275 | 0.110584 | 8.405381 | 3.847352 | 0.000339 | 0.018174 | 0.087695 |
| ILMN_2323633 | 0.110566 | 8.173019 | 3.895057 | 0.000292 | 0.016243 | 0.225905 |
| ILMN_1803906 | -0.11045 | 6.160431 | -3.37502 | 0.001433 | 0.044346 | -1.22913 |
| ILMN_1725079 | 0.11042  | 7.7611   | 3.690842 | 0.000552 | 0.024798 | -0.35936 |
| ILMN_1669142 | 0.11004  | 7.797861 | 3.694115 | 0.000546 | 0.024785 | -0.35011 |
| ILMN_2094952 | -0.11002 | 6.927402 | -3.63515 | 0.000655 | 0.027737 | -0.51597 |
| ILMN_1806937 | 0.109829 | 8.86122  | 4.330333 | 7.14E-05 | 0.006341 | 1.524645 |
| ILMN_2372011 | 0.1097   | 7.896012 | 3.3726   | 0.001443 | 0.044537 | -1.23562 |
| ILMN_1712859 | -0.10944 | 6.573917 | -4.08917 | 0.000157 | 0.010993 | 0.797047 |
| ILMN_1661156 | -0.10923 | 6.184562 | -3.88361 | 0.000302 | 0.016653 | 0.192673 |
| ILMN_1685022 | 0.109037 | 7.183875 | 3.334327 | 0.001615 | 0.047559 | -1.33781 |
| ILMN_1685286 | 0.108951 | 6.625015 | 3.782909 | 0.000415 | 0.020575 | -0.09759 |
| ILMN_1777528 | 0.108802 | 8.948298 | 3.996399 | 0.000211 | 0.013271 | 0.522373 |
| ILMN_2242068 | 0.108732 | 6.378102 | 3.517001 | 0.000938 | 0.034825 | -0.84374 |
| ILMN_2181445 | -0.10869 | 9.481545 | -4.32975 | 7.15E-05 | 0.006341 | 1.522877 |
| ILMN_1691112 | -0.10861 | 7.70707  | -3.68323 | 0.000565 | 0.025005 | -0.38084 |
| ILMN_1741736 | -0.10856 | 8.045154 | -3.84463 | 0.000342 | 0.018245 | 0.079826 |
| ILMN_2352724 | -0.10828 | 7.306223 | -3.55057 | 0.000847 | 0.032718 | -0.75126 |
| ILMN_3261197 | 0.108269 | 10.5973  | 3.367275 | 0.001466 | 0.044915 | -1.24988 |
| ILMN_1726288 | -0.10821 | 7.420287 | -3.31397 | 0.001715 | 0.04894  | -1.39185 |
| ILMN_2058141 | 0.108209 | 11.87573 | 3.704362 | 0.000529 | 0.0243   | -0.32114 |
| ILMN_2144791 | -0.10817 | 7.125175 | -3.84095 | 0.000346 | 0.018403 | 0.069227 |
| ILMN_2341467 | 0.108098 | 9.430058 | 3.773711 | 0.000427 | 0.020962 | -0.1239  |
| ILMN_1694504 | 0.108085 | 7.615096 | 3.590374 | 0.000751 | 0.030491 | -0.64093 |
| ILMN_1704500 | -0.10804 | 6.769832 | -3.56476 | 0.000812 | 0.032053 | -0.712   |
| ILMN_3205271 | 0.108002 | 11.52807 | 3.536005 | 0.000886 | 0.033479 | -0.79144 |
| ILMN_2124361 | 0.107929 | 6.170762 | 4.081002 | 0.000161 | 0.011128 | 0.772744 |
| ILMN_1728224 | 0.107888 | 7.247527 | 3.320295 | 0.001683 | 0.048567 | -1.37509 |
| ILMN_2073010 | 0.107887 | 8.622636 | 3.416923 | 0.001266 | 0.041319 | -1.11639 |

|              |          |          |          |          |          |          |
|--------------|----------|----------|----------|----------|----------|----------|
| ILMN_1904135 | 0.107822 | 6.387132 | 3.634787 | 0.000656 | 0.027737 | -0.517   |
| ILMN_2346727 | -0.10777 | 7.1026   | -3.68242 | 0.000566 | 0.025036 | -0.38314 |
| ILMN_1755221 | -0.10769 | 7.623086 | -3.9651  | 0.000234 | 0.014174 | 0.430392 |
| ILMN_1732053 | 0.107534 | 10.0834  | 3.339375 | 0.001592 | 0.047297 | -1.32437 |
| ILMN_1793267 | 0.107352 | 6.14238  | 3.35162  | 0.001535 | 0.046067 | -1.29172 |
| ILMN_1773066 | -0.10693 | 7.448939 | -3.39876 | 0.001336 | 0.042702 | -1.16537 |
| ILMN_1698166 | -0.10678 | 7.116865 | -4.02243 | 0.000194 | 0.012553 | 0.599142 |
| ILMN_3244526 | 0.106686 | 7.229915 | 3.406511 | 0.001305 | 0.042165 | -1.14448 |
| ILMN_1770667 | -0.10665 | 7.11012  | -3.65104 | 0.000624 | 0.027053 | -0.47144 |
| ILMN_1761828 | 0.106447 | 8.61968  | 3.621738 | 0.000682 | 0.028587 | -0.5535  |
| ILMN_1702231 | -0.10625 | 6.19729  | -3.35878 | 0.001503 | 0.045462 | -1.27261 |
| ILMN_1867321 | 0.106126 | 6.243638 | 4.930747 | 9.41E-06 | 0.001673 | 3.407302 |
| ILMN_2166686 | 0.105796 | 6.072654 | 4.007556 | 0.000204 | 0.012947 | 0.555243 |
| ILMN_1717337 | -0.10572 | 10.11213 | -3.86899 | 0.000317 | 0.017273 | 0.150263 |
| ILMN_1775753 | 0.10554  | 6.932964 | 3.567036 | 0.000806 | 0.03191  | -0.7057  |
| ILMN_1788095 | 0.105261 | 6.731435 | 3.722433 | 0.000501 | 0.023352 | -0.26993 |
| ILMN_1749345 | -0.10518 | 9.090378 | -3.41393 | 0.001277 | 0.041531 | -1.12448 |
| ILMN_1735402 | 0.105141 | 7.127156 | 4.278508 | 8.47E-05 | 0.007087 | 1.366719 |
| ILMN_1701655 | 0.105136 | 7.201903 | 3.812669 | 0.000378 | 0.019476 | -0.01223 |
| ILMN_1721344 | -0.10505 | 6.880078 | -3.64175 | 0.000642 | 0.027488 | -0.49747 |
| ILMN_1713406 | 0.105018 | 8.336282 | 3.920207 | 0.000269 | 0.015534 | 0.299118 |
| ILMN_1767766 | 0.104824 | 9.131113 | 3.807658 | 0.000384 | 0.019694 | -0.02662 |
| ILMN_1811178 | -0.10471 | 7.144893 | -3.63926 | 0.000647 | 0.027631 | -0.50448 |
| ILMN_2083567 | 0.104483 | 6.215335 | 3.334859 | 0.001613 | 0.047559 | -1.33639 |
| ILMN_1673172 | 0.104229 | 6.986877 | 3.637125 | 0.000651 | 0.0277   | -0.51045 |
| ILMN_2352190 | 0.104157 | 6.39338  | 3.688705 | 0.000556 | 0.024798 | -0.36539 |
| ILMN_2412761 | -0.10414 | 6.307542 | -3.92087 | 0.000269 | 0.015534 | 0.301062 |
| ILMN_1715175 | -0.10405 | 9.658292 | -3.40015 | 0.00133  | 0.042661 | -1.16162 |
| ILMN_3309468 | 0.10385  | 6.141024 | 4.500567 | 4.06E-05 | 0.00429  | 2.04898  |
| ILMN_1766195 | -0.10384 | 7.173367 | -3.717   | 0.000509 | 0.023652 | -0.28534 |
| ILMN_1738883 | -0.10366 | 6.05132  | -3.61945 | 0.000687 | 0.028753 | -0.5599  |
| ILMN_1732705 | 0.103659 | 9.413949 | 3.860027 | 0.000326 | 0.017656 | 0.12433  |
| ILMN_2150284 | 0.103456 | 7.344529 | 4.288491 | 8.20E-05 | 0.006902 | 1.397077 |
| ILMN_1764873 | -0.10329 | 5.920363 | -3.76566 | 0.000438 | 0.021343 | -0.1469  |
| ILMN_1658144 | -0.10323 | 7.851685 | -4.67203 | 2.28E-05 | 0.00293  | 2.585089 |
| ILMN_1730307 | -0.10317 | 6.961192 | -3.35584 | 0.001516 | 0.045753 | -1.28047 |
| ILMN_3247906 | 0.103035 | 8.076963 | 3.43884  | 0.001186 | 0.03959  | -1.05708 |
| ILMN_1688526 | -0.10265 | 11.46092 | -3.33296 | 0.001622 | 0.047632 | -1.34145 |
| ILMN_3236239 | -0.10261 | 6.713216 | -3.33514 | 0.001612 | 0.047559 | -1.33563 |
| ILMN_1684755 | 0.102469 | 6.098881 | 3.712874 | 0.000516 | 0.023889 | -0.29704 |
| ILMN_2327276 | 0.102459 | 10.67604 | 4.109121 | 0.000147 | 0.010521 | 0.856514 |
| ILMN_2336109 | 0.102059 | 7.715795 | 4.129083 | 0.000138 | 0.010087 | 0.916146 |
| ILMN_1682354 | 0.101986 | 6.46123  | 4.919535 | 9.78E-06 | 0.001712 | 3.371369 |
| ILMN_1789575 | -0.10181 | 6.965427 | -4.29027 | 8.15E-05 | 0.006902 | 1.402486 |
| ILMN_1722583 | 0.101468 | 7.463456 | 3.504267 | 0.000975 | 0.035332 | -0.87869 |
| ILMN_1689720 | -0.10139 | 6.837395 | -3.81371 | 0.000377 | 0.019442 | -0.00923 |
| ILMN_1745421 | -0.10136 | 7.696077 | -3.40653 | 0.001305 | 0.042165 | -1.14444 |
| ILMN_1688160 | -0.10136 | 6.519732 | -3.96819 | 0.000231 | 0.01406  | 0.439474 |
| ILMN_1688853 | 0.101327 | 7.418838 | 4.18768  | 0.000114 | 0.008774 | 1.091972 |
| ILMN_1666376 | 0.101309 | 7.528633 | 3.316112 | 0.001704 | 0.04894  | -1.38618 |
| ILMN_2396786 | -0.10131 | 7.295269 | -4.01067 | 0.000202 | 0.012866 | 0.564434 |
| ILMN_1660577 | -0.10115 | 11.44089 | -3.64364 | 0.000638 | 0.027398 | -0.49218 |
| ILMN_1660232 | 0.101072 | 9.078017 | 3.323601 | 0.001667 | 0.048418 | -1.36631 |
| ILMN_1773080 | -0.10104 | 12.90952 | -3.5396  | 0.000876 | 0.033207 | -0.78153 |

|              |          |          |          |          |          |          |
|--------------|----------|----------|----------|----------|----------|----------|
| ILMN_1714623 | 0.101015 | 9.620491 | 3.662811 | 0.000602 | 0.026324 | -0.43836 |
| ILMN_2349459 | 0.10088  | 8.499249 | 3.348595 | 0.001549 | 0.046318 | -1.2998  |
| ILMN_1722532 | -0.10088 | 7.896159 | -3.68538 | 0.000561 | 0.024936 | -0.37478 |
| ILMN_2370464 | 0.100737 | 7.256077 | 3.314346 | 0.001713 | 0.04894  | -1.39087 |
| ILMN_3249501 | 0.100615 | 6.204479 | 4.164066 | 0.000123 | 0.009166 | 1.02098  |
| ILMN_3238560 | -0.10055 | 8.406128 | -3.33944 | 0.001591 | 0.047297 | -1.32419 |
| ILMN_1689578 | -0.10031 | 6.207657 | -3.55639 | 0.000833 | 0.0324   | -0.73517 |
| ILMN_1685275 | 0.100293 | 5.555373 | 3.904271 | 0.000283 | 0.015964 | 0.252698 |
| ILMN_1782094 | -0.10027 | 7.267839 | -4.02281 | 0.000194 | 0.012553 | 0.600251 |
| ILMN_1668426 | -0.10004 | 6.007205 | -4.09431 | 0.000154 | 0.010901 | 0.812354 |
| ILMN_2095133 | 0.100021 | 8.352404 | 4.03933  | 0.000184 | 0.012201 | 0.649103 |
| ILMN_1726107 | 0.099957 | 7.107832 | 4.702159 | 2.06E-05 | 0.002748 | 2.680049 |
| ILMN_2357086 | 0.099948 | 5.587509 | 3.398261 | 0.001338 | 0.042702 | -1.1667  |
| ILMN_1818617 | 0.09988  | 6.776722 | 3.360539 | 0.001495 | 0.045325 | -1.2679  |
| ILMN_1753370 | 0.099844 | 6.248383 | 4.126648 | 0.000139 | 0.01013  | 0.908865 |
| ILMN_1719988 | 0.099841 | 6.098033 | 3.562142 | 0.000818 | 0.032056 | -0.71925 |
| ILMN_1677452 | 0.099558 | 8.020636 | 3.546757 | 0.000857 | 0.032877 | -0.76178 |
| ILMN_1778032 | 0.099459 | 8.78322  | 3.594463 | 0.000742 | 0.030188 | -0.62955 |
| ILMN_3246801 | 0.099006 | 6.258492 | 4.436944 | 5.02E-05 | 0.004955 | 1.852047 |
| ILMN_1753575 | 0.098891 | 6.485391 | 3.876786 | 0.000309 | 0.016928 | 0.172866 |
| ILMN_1781672 | -0.09881 | 6.603638 | -3.392   | 0.001363 | 0.043142 | -1.18355 |
| ILMN_1672042 | 0.098724 | 7.272439 | 3.410424 | 0.00129  | 0.041926 | -1.13393 |
| ILMN_2380801 | 0.098702 | 6.182506 | 3.510175 | 0.000957 | 0.035078 | -0.86249 |
| ILMN_1691980 | -0.09862 | 6.551937 | -3.4983  | 0.000992 | 0.035741 | -0.89503 |
| ILMN_2344079 | 0.09857  | 6.244167 | 3.840913 | 0.000346 | 0.018403 | 0.069108 |
| ILMN_1803819 | -0.09856 | 9.694341 | -4.33494 | 7.03E-05 | 0.006282 | 1.53871  |
| ILMN_1798659 | -0.09851 | 8.113755 | -3.38289 | 0.0014   | 0.043982 | -1.20802 |
| ILMN_1694486 | -0.09839 | 6.609586 | -3.98166 | 0.000222 | 0.013735 | 0.479006 |
| ILMN_1671516 | -0.09837 | 7.946452 | -3.76597 | 0.000437 | 0.021343 | -0.14601 |
| ILMN_1660844 | -0.09829 | 8.236984 | -3.57318 | 0.000791 | 0.031501 | -0.68866 |
| ILMN_1699987 | -0.09814 | 6.630318 | -3.58789 | 0.000757 | 0.030654 | -0.64783 |
| ILMN_2098947 | 0.097789 | 6.221145 | 3.98461  | 0.000219 | 0.013631 | 0.487689 |
| ILMN_1760682 | 0.09777  | 6.726168 | 3.586475 | 0.00076  | 0.030714 | -0.65176 |
| ILMN_1729188 | 0.097728 | 6.18162  | 3.316423 | 0.001702 | 0.04894  | -1.38536 |
| ILMN_1713732 | 0.097719 | 7.408825 | 3.513201 | 0.000949 | 0.034911 | -0.85418 |
| ILMN_1687751 | 0.097687 | 6.294353 | 3.40336  | 0.001318 | 0.042415 | -1.15297 |
| ILMN_2367141 | 0.097646 | 6.138928 | 4.486616 | 4.25E-05 | 0.004454 | 2.005701 |
| ILMN_3307648 | 0.0975   | 10.48895 | 4.152398 | 0.000128 | 0.009459 | 0.985967 |
| ILMN_1811301 | 0.097492 | 7.229325 | 4.025661 | 0.000192 | 0.012526 | 0.60868  |
| ILMN_1670377 | 0.097453 | 6.558711 | 3.575401 | 0.000786 | 0.031452 | -0.68251 |
| ILMN_3194087 | -0.09724 | 6.69329  | -3.39717 | 0.001342 | 0.042762 | -1.16965 |
| ILMN_1796464 | -0.09707 | 6.732443 | -3.97836 | 0.000224 | 0.013806 | 0.46933  |
| ILMN_1730631 | 0.097025 | 7.288177 | 3.647719 | 0.00063  | 0.027218 | -0.48075 |
| ILMN_1750008 | 0.09699  | 7.387539 | 3.46873  | 0.001084 | 0.03761  | -0.97583 |
| ILMN_1721241 | 0.096955 | 6.310762 | 3.82963  | 0.000358 | 0.018776 | 0.036578 |
| ILMN_1676745 | 0.09691  | 7.911071 | 4.256767 | 9.10E-05 | 0.007431 | 1.300714 |
| ILMN_1690761 | 0.09686  | 8.819047 | 3.88623  | 0.0003   | 0.016569 | 0.200264 |
| ILMN_2052163 | -0.09682 | 9.130896 | -3.44622 | 0.00116  | 0.03905  | -1.03707 |
| ILMN_1722981 | -0.09665 | 6.391925 | -3.48958 | 0.001019 | 0.036364 | -0.9189  |
| ILMN_1722648 | 0.096607 | 10.1849  | 3.55266  | 0.000842 | 0.032579 | -0.74548 |
| ILMN_1844905 | -0.09641 | 6.367295 | -3.56443 | 0.000813 | 0.032053 | -0.71292 |
| ILMN_2161556 | 0.096378 | 6.790024 | 4.515731 | 3.86E-05 | 0.004141 | 2.096081 |
| ILMN_2049417 | 0.096302 | 5.960285 | 3.513685 | 0.000947 | 0.034911 | -0.85285 |
| ILMN_2156953 | -0.09594 | 7.779871 | -4.53731 | 3.59E-05 | 0.003963 | 2.163221 |

|              |          |          |          |          |          |          |
|--------------|----------|----------|----------|----------|----------|----------|
| ILMN_1694385 | 0.095808 | 11.85941 | 3.913619 | 0.000275 | 0.015619 | 0.279917 |
| ILMN_1674698 | 0.095779 | 7.212241 | 4.085547 | 0.000159 | 0.011033 | 0.786263 |
| ILMN_1698940 | 0.095768 | 13.88241 | 3.498004 | 0.000993 | 0.035741 | -0.89585 |
| ILMN_1688515 | 0.09567  | 7.727903 | 3.595389 | 0.00074  | 0.030187 | -0.62698 |
| ILMN_1812281 | 0.09549  | 5.969044 | 3.69548  | 0.000544 | 0.024713 | -0.34626 |
| ILMN_1713450 | 0.095469 | 9.115566 | 3.437299 | 0.001191 | 0.039657 | -1.06126 |
| ILMN_1652412 | -0.09542 | 6.524361 | -3.71248 | 0.000516 | 0.023889 | -0.29815 |
| ILMN_1792518 | -0.09535 | 8.309534 | -3.55593 | 0.000834 | 0.032408 | -0.73643 |
| ILMN_1738369 | 0.095124 | 10.02442 | 4.042827 | 0.000182 | 0.01217  | 0.659455 |
| ILMN_2222317 | -0.09496 | 7.504694 | -3.9435  | 0.00025  | 0.014894 | 0.36713  |
| ILMN_1710652 | 0.094928 | 6.22486  | 3.381187 | 0.001407 | 0.044059 | -1.21259 |
| ILMN_2290068 | -0.09481 | 5.847125 | -4.13847 | 0.000134 | 0.009854 | 0.944225 |
| ILMN_1735792 | -0.09481 | 7.183724 | -4.41332 | 5.43E-05 | 0.005269 | 1.779216 |
| ILMN_1803564 | -0.0948  | 8.155443 | -3.63507 | 0.000655 | 0.027737 | -0.51621 |
| ILMN_2402805 | 0.094731 | 7.960192 | 3.565411 | 0.00081  | 0.032031 | -0.7102  |
| ILMN_1671374 | 0.09456  | 9.250392 | 3.531371 | 0.000898 | 0.03384  | -0.80421 |
| ILMN_1688070 | 0.094556 | 7.090268 | 3.431278 | 0.001213 | 0.040162 | -1.07757 |
| ILMN_1738589 | 0.094555 | 6.429344 | 3.446435 | 0.001159 | 0.03905  | -1.03648 |
| ILMN_1753980 | -0.09452 | 7.043688 | -4.49934 | 4.07E-05 | 0.004294 | 2.045159 |
| ILMN_2058512 | -0.09435 | 8.228484 | -3.73553 | 0.000481 | 0.022762 | -0.23273 |
| ILMN_1698680 | 0.094204 | 6.402033 | 4.091813 | 0.000156 | 0.010944 | 0.804916 |
| ILMN_1796900 | -0.09402 | 7.310991 | -3.77876 | 0.00042  | 0.020724 | -0.10947 |
| ILMN_2363586 | -0.09381 | 10.02952 | -4.03585 | 0.000186 | 0.012254 | 0.638803 |
| ILMN_1701604 | -0.09366 | 6.390781 | -3.57887 | 0.000778 | 0.031213 | -0.67289 |
| ILMN_1684258 | -0.09362 | 13.89482 | -4.84762 | 1.25E-05 | 0.001927 | 3.141521 |
| ILMN_2412214 | -0.09358 | 5.800786 | -3.87785 | 0.000308 | 0.016904 | 0.175947 |
| ILMN_1692948 | -0.09354 | 7.616537 | -3.93696 | 0.000255 | 0.015076 | 0.348031 |
| ILMN_1713936 | -0.09346 | 6.452103 | -3.82175 | 0.000367 | 0.019072 | 0.013894 |
| ILMN_1769191 | 0.093225 | 12.14777 | 3.515665 | 0.000942 | 0.034873 | -0.84741 |
| ILMN_1709026 | -0.09312 | 6.763506 | -3.42673 | 0.001229 | 0.040554 | -1.08988 |
| ILMN_1727880 | 0.093119 | 5.588242 | 3.516194 | 0.00094  | 0.034855 | -0.84596 |
| ILMN_1663489 | -0.09301 | 7.630736 | -3.92091 | 0.000269 | 0.015534 | 0.301156 |
| ILMN_1656706 | 0.092822 | 5.463017 | 4.34745  | 6.75E-05 | 0.006091 | 1.576987 |
| ILMN_1795711 | 0.092655 | 5.933911 | 3.896968 | 0.00029  | 0.016171 | 0.231457 |
| ILMN_2147435 | -0.0926  | 8.722297 | -3.69223 | 0.00055  | 0.024798 | -0.35543 |
| ILMN_1663772 | 0.092454 | 6.030705 | 3.654784 | 0.000617 | 0.026811 | -0.46092 |
| ILMN_1840934 | 0.092274 | 6.305919 | 3.423421 | 0.001241 | 0.040845 | -1.09883 |
| ILMN_1732049 | 0.092268 | 7.307442 | 3.3788   | 0.001417 | 0.044216 | -1.219   |
| ILMN_1698404 | -0.09227 | 6.749597 | -3.39032 | 0.00137  | 0.043317 | -1.18805 |
| ILMN_3240962 | 0.092263 | 6.771073 | 3.5193   | 0.000931 | 0.034679 | -0.83742 |
| ILMN_1682062 | 0.092234 | 6.578357 | 3.546765 | 0.000857 | 0.032877 | -0.76176 |
| ILMN_2389151 | -0.0922  | 10.55855 | -3.38591 | 0.001388 | 0.043766 | -1.19992 |
| ILMN_1800447 | -0.09187 | 8.299848 | -4.12091 | 0.000142 | 0.010277 | 0.891718 |
| ILMN_1791884 | 0.091862 | 6.724049 | 3.776533 | 0.000423 | 0.020838 | -0.11583 |
| ILMN_3248057 | 0.091861 | 6.076667 | 4.950503 | 8.79E-06 | 0.001614 | 3.470677 |
| ILMN_1681798 | 0.091777 | 6.133635 | 3.65202  | 0.000622 | 0.027005 | -0.46868 |
| ILMN_2296843 | 0.091553 | 7.075077 | 3.341793 | 0.00158  | 0.047131 | -1.31793 |
| ILMN_2225887 | 0.091535 | 12.82245 | 3.81848  | 0.000371 | 0.019211 | 0.004479 |
| ILMN_1661409 | 0.091431 | 6.498988 | 3.794714 | 0.0004   | 0.020061 | -0.06377 |
| ILMN_2153485 | -0.09108 | 6.056836 | -4.26476 | 8.86E-05 | 0.007286 | 1.324969 |
| ILMN_1704398 | 0.090493 | 5.50716  | 3.766217 | 0.000437 | 0.021343 | -0.1453  |
| ILMN_1809212 | -0.09037 | 6.2086   | -3.63104 | 0.000663 | 0.028014 | -0.52748 |
| ILMN_2274531 | 0.09031  | 6.273664 | 3.929466 | 0.000262 | 0.015308 | 0.326134 |
| ILMN_1741391 | -0.09025 | 7.728987 | -3.82714 | 0.000361 | 0.018895 | 0.029415 |

|              |          |          |          |          |          |          |
|--------------|----------|----------|----------|----------|----------|----------|
| ILMN_3262348 | 0.090213 | 6.846546 | 3.628027 | 0.000669 | 0.028179 | -0.53591 |
| ILMN_1767111 | 0.089716 | 6.715365 | 3.452807 | 0.001137 | 0.038458 | -1.01917 |
| ILMN_1666019 | 0.089581 | 6.638663 | 3.670931 | 0.000587 | 0.025871 | -0.41551 |
| ILMN_2342579 | 0.089501 | 5.564237 | 3.482111 | 0.001042 | 0.036685 | -0.93932 |
| ILMN_1652819 | 0.089493 | 6.465272 | 3.467778 | 0.001087 | 0.037641 | -0.97843 |
| ILMN_1665060 | -0.08948 | 6.251033 | -3.44563 | 0.001162 | 0.03908  | -1.03865 |
| ILMN_3235168 | 0.089228 | 8.770873 | 3.321528 | 0.001677 | 0.048546 | -1.37182 |
| ILMN_1741398 | 0.089212 | 6.951261 | 3.470842 | 0.001078 | 0.037448 | -0.97008 |
| ILMN_1771238 | -0.08904 | 7.869939 | -4.01338 | 0.0002   | 0.012779 | 0.572436 |
| ILMN_2193498 | -0.08886 | 6.518431 | -3.61054 | 0.000706 | 0.029332 | -0.58475 |
| ILMN_1677305 | 0.088838 | 7.166174 | 3.452696 | 0.001138 | 0.038458 | -1.01947 |
| ILMN_1661307 | 0.088734 | 5.799211 | 3.905069 | 0.000283 | 0.015964 | 0.255021 |
| ILMN_2098616 | -0.08859 | 6.798537 | -3.33455 | 0.001614 | 0.047559 | -1.3372  |
| ILMN_1771738 | -0.08848 | 7.554359 | -3.50964 | 0.000959 | 0.035098 | -0.86396 |
| ILMN_1789535 | 0.088435 | 6.954984 | 4.221496 | 0.000102 | 0.008185 | 1.193952 |
| ILMN_3238402 | 0.088432 | 5.941097 | 3.704776 | 0.000529 | 0.0243   | -0.31997 |
| ILMN_1680703 | 0.08834  | 10.15744 | 4.640918 | 2.53E-05 | 0.003133 | 2.48725  |
| ILMN_1781001 | -0.0881  | 6.255321 | -3.34503 | 0.001565 | 0.046724 | -1.30929 |
| ILMN_1682335 | -0.0879  | 6.310612 | -3.68856 | 0.000556 | 0.024798 | -0.36582 |
| ILMN_2111918 | -0.0879  | 8.222654 | -3.30673 | 0.001751 | 0.04982  | -1.41104 |
| ILMN_1789618 | -0.08776 | 6.918948 | -3.43868 | 0.001186 | 0.03959  | -1.05751 |
| ILMN_2089340 | -0.08776 | 6.555807 | -3.5417  | 0.000871 | 0.033133 | -0.77575 |
| ILMN_1812898 | 0.087652 | 5.747437 | 3.437522 | 0.00119  | 0.039657 | -1.06065 |
| ILMN_2110496 | -0.08759 | 6.781827 | -4.29689 | 7.97E-05 | 0.006787 | 1.422636 |
| ILMN_2280731 | -0.08733 | 6.640289 | -3.64107 | 0.000643 | 0.027512 | -0.4994  |
| ILMN_1765060 | -0.08709 | 8.299388 | -3.39352 | 0.001357 | 0.043027 | -1.17946 |
| ILMN_1729167 | -0.08709 | 7.546048 | -4.40317 | 5.61E-05 | 0.005419 | 1.747976 |
| ILMN_1675055 | 0.086687 | 7.704113 | 3.919883 | 0.00027  | 0.015534 | 0.298174 |
| ILMN_1683044 | -0.08666 | 8.296903 | -3.32379 | 0.001666 | 0.048418 | -1.36582 |
| ILMN_1656145 | 0.086635 | 10.027   | 3.355723 | 0.001517 | 0.045753 | -1.28077 |
| ILMN_1688435 | -0.08655 | 6.027814 | -3.66478 | 0.000598 | 0.026232 | -0.43283 |
| ILMN_1792860 | 0.086297 | 6.301839 | 4.089169 | 0.000157 | 0.010993 | 0.797044 |
| ILMN_1672122 | 0.086186 | 5.998331 | 3.425486 | 0.001234 | 0.040665 | -1.09324 |
| ILMN_1743643 | 0.085852 | 6.202437 | 3.547171 | 0.000856 | 0.032877 | -0.76064 |
| ILMN_1688534 | 0.08559  | 7.514029 | 3.420846 | 0.001251 | 0.041004 | -1.10579 |
| ILMN_3289631 | -0.0849  | 5.915389 | -3.64618 | 0.000633 | 0.027241 | -0.48506 |
| ILMN_1706553 | 0.084638 | 9.101854 | 3.479934 | 0.001049 | 0.036887 | -0.94527 |
| ILMN_1718042 | 0.084435 | 6.34898  | 3.437144 | 0.001192 | 0.039657 | -1.06168 |
| ILMN_2081682 | 0.084345 | 7.750483 | 3.799961 | 0.000393 | 0.01988  | -0.04872 |
| ILMN_1719763 | 0.084344 | 5.881417 | 4.115445 | 0.000144 | 0.010394 | 0.875391 |
| ILMN_1725175 | -0.08425 | 6.93202  | -4.19078 | 0.000113 | 0.008743 | 1.101295 |
| ILMN_1698715 | -0.08416 | 6.978506 | -3.65688 | 0.000613 | 0.026706 | -0.45502 |
| ILMN_1739241 | -0.08378 | 5.446943 | -3.41563 | 0.00127  | 0.041439 | -1.11989 |
| ILMN_1739454 | -0.08364 | 7.317376 | -4.36706 | 6.33E-05 | 0.005854 | 1.637055 |
| ILMN_1685125 | 0.083364 | 6.304599 | 4.206249 | 0.000107 | 0.008446 | 1.147927 |
| ILMN_1727361 | 0.083351 | 8.569409 | 3.523255 | 0.00092  | 0.034417 | -0.82655 |
| ILMN_1893764 | 0.083263 | 6.633854 | 3.45882  | 0.001117 | 0.038166 | -1.00282 |
| ILMN_1790354 | -0.08288 | 10.19535 | -3.39948 | 0.001333 | 0.042678 | -1.16343 |
| ILMN_1673944 | 0.082811 | 10.05075 | 3.386617 | 0.001385 | 0.043715 | -1.19801 |
| ILMN_1723846 | 0.082361 | 7.409379 | 3.558781 | 0.000827 | 0.032266 | -0.72855 |
| ILMN_1722742 | -0.08234 | 6.338646 | -3.33293 | 0.001622 | 0.047632 | -1.34152 |
| ILMN_1715546 | 0.082067 | 6.674725 | 3.374367 | 0.001436 | 0.044352 | -1.23088 |
| ILMN_1828216 | 0.081858 | 6.239727 | 3.471035 | 0.001077 | 0.037448 | -0.96955 |
| ILMN_1726025 | 0.081766 | 7.314399 | 3.608685 | 0.00071  | 0.029463 | -0.58994 |

|              |          |          |          |          |          |          |
|--------------|----------|----------|----------|----------|----------|----------|
| ILMN_1651642 | 0.081748 | 6.414432 | 3.383956 | 0.001396 | 0.0439   | -1.20516 |
| ILMN_2279217 | -0.08169 | 6.027258 | -4.25998 | 9.00E-05 | 0.007371 | 1.310469 |
| ILMN_1700048 | 0.081616 | 5.846974 | 3.522609 | 0.000922 | 0.034446 | -0.82833 |
| ILMN_1742923 | 0.081258 | 6.171055 | 3.427659 | 0.001226 | 0.040519 | -1.08736 |
| ILMN_1806310 | -0.08126 | 5.994995 | -3.38214 | 0.001403 | 0.043982 | -1.21004 |
| ILMN_1706959 | 0.081203 | 8.660833 | 3.552337 | 0.000843 | 0.032579 | -0.74637 |
| ILMN_1726930 | -0.08109 | 7.077231 | -3.83218 | 0.000356 | 0.018691 | 0.043915 |
| ILMN_2141157 | -0.08103 | 6.212235 | -4.31096 | 7.61E-05 | 0.006596 | 1.46551  |
| ILMN_1793615 | -0.08099 | 5.851298 | -3.46684 | 0.001091 | 0.037673 | -0.98099 |
| ILMN_1715181 | 0.080834 | 6.690597 | 3.483711 | 0.001037 | 0.036654 | -0.93495 |
| ILMN_1678627 | 0.080782 | 5.3752   | 4.266372 | 8.81E-05 | 0.007286 | 1.329856 |
| ILMN_1692896 | 0.080746 | 6.625689 | 3.568255 | 0.000803 | 0.031902 | -0.70232 |
| ILMN_1735415 | 0.080736 | 7.315729 | 3.314233 | 0.001713 | 0.04894  | -1.39117 |
| ILMN_3297317 | 0.080418 | 13.90607 | 3.783083 | 0.000415 | 0.020575 | -0.09709 |
| ILMN_3245143 | -0.08022 | 5.815494 | -3.80461 | 0.000388 | 0.01978  | -0.03537 |
| ILMN_1776352 | -0.08009 | 7.781603 | -3.44382 | 0.001168 | 0.039253 | -1.04356 |
| ILMN_1774281 | -0.08001 | 6.209842 | -3.33091 | 0.001632 | 0.047848 | -1.34688 |
| ILMN_2197128 | 0.079973 | 6.431742 | 3.330231 | 0.001635 | 0.047848 | -1.3487  |
| ILMN_2177460 | 0.079857 | 6.285313 | 3.316432 | 0.001702 | 0.04894  | -1.38534 |
| ILMN_1769503 | -0.07962 | 5.950628 | -3.33759 | 0.0016   | 0.047389 | -1.32912 |
| ILMN_1698725 | 0.079448 | 6.157744 | 3.917272 | 0.000272 | 0.015534 | 0.290564 |
| ILMN_3245893 | -0.0793  | 6.436412 | -3.46023 | 0.001112 | 0.038043 | -0.99897 |
| ILMN_1662334 | 0.079128 | 9.877035 | 4.099661 | 0.000152 | 0.010781 | 0.828299 |
| ILMN_2366714 | -0.07908 | 7.945501 | -3.51268 | 0.00095  | 0.034911 | -0.8556  |
| ILMN_2049642 | -0.07889 | 10.4411  | -3.91907 | 0.00027  | 0.015534 | 0.2958   |
| ILMN_1718898 | 0.078805 | 6.109315 | 3.590075 | 0.000752 | 0.030491 | -0.64176 |
| ILMN_1773716 | 0.078737 | 7.94473  | 3.423365 | 0.001242 | 0.040845 | -1.09898 |
| ILMN_2134224 | 0.078722 | 6.828101 | 3.848606 | 0.000338 | 0.018131 | 0.091317 |
| ILMN_1782730 | 0.078428 | 6.297205 | 4.27458  | 8.58E-05 | 0.007145 | 1.354782 |
| ILMN_1692486 | 0.078346 | 8.511366 | 3.801548 | 0.000391 | 0.019839 | -0.04417 |
| ILMN_1722771 | -0.07816 | 5.778356 | -3.54389 | 0.000865 | 0.033089 | -0.76969 |
| ILMN_3268590 | 0.077823 | 5.775323 | 3.516837 | 0.000938 | 0.034825 | -0.84419 |
| ILMN_1721628 | 0.077529 | 5.548135 | 3.353768 | 0.001526 | 0.045896 | -1.28599 |
| ILMN_2388965 | 0.077408 | 5.253054 | 4.08695  | 0.000158 | 0.011033 | 0.790439 |
| ILMN_2124425 | 0.077408 | 5.376862 | 3.615942 | 0.000695 | 0.028957 | -0.56968 |
| ILMN_1676159 | -0.07724 | 9.37641  | -3.31593 | 0.001705 | 0.04894  | -1.38667 |
| ILMN_2390586 | -0.07637 | 7.047253 | -3.81925 | 0.00037  | 0.019194 | 0.006685 |
| ILMN_1689029 | -0.07601 | 6.564634 | -3.43452 | 0.001201 | 0.03989  | -1.06878 |
| ILMN_1809094 | -0.07597 | 6.7153   | -3.46461 | 0.001098 | 0.037789 | -0.98707 |
| ILMN_1713454 | 0.07573  | 6.15932  | 3.432302 | 0.001209 | 0.040078 | -1.07479 |
| ILMN_1803094 | 0.075213 | 6.214764 | 3.5056   | 0.000971 | 0.035265 | -0.87504 |
| ILMN_1745668 | -0.07454 | 5.787069 | -3.78351 | 0.000414 | 0.020575 | -0.09587 |
| ILMN_1696826 | 0.074385 | 5.909971 | 4.184926 | 0.000115 | 0.008798 | 1.083682 |
| ILMN_1737818 | 0.074303 | 7.595981 | 3.330799 | 0.001632 | 0.047848 | -1.34719 |
| ILMN_1806782 | 0.074235 | 6.27442  | 3.377609 | 0.001422 | 0.044289 | -1.22219 |
| ILMN_1705330 | -0.0737  | 6.392187 | -3.34973 | 0.001544 | 0.046203 | -1.29675 |
| ILMN_1761181 | 0.073293 | 5.857509 | 3.562204 | 0.000818 | 0.032056 | -0.71908 |
| ILMN_1792242 | 0.073257 | 5.673458 | 3.315421 | 0.001707 | 0.04894  | -1.38802 |
| ILMN_1712751 | 0.073132 | 7.449822 | 3.354747 | 0.001521 | 0.045804 | -1.28337 |
| ILMN_1801395 | -0.07282 | 5.985178 | -3.33039 | 0.001634 | 0.047848 | -1.34828 |
| ILMN_1699836 | 0.072332 | 5.569219 | 3.441598 | 0.001176 | 0.039438 | -1.0496  |
| ILMN_1715654 | 0.072229 | 6.159278 | 3.493423 | 0.001007 | 0.036049 | -0.9084  |
| ILMN_1748607 | -0.07213 | 5.781067 | -3.52367 | 0.000919 | 0.03441  | -0.82539 |
| ILMN_1713247 | -0.07186 | 5.57309  | -3.48722 | 0.001026 | 0.036495 | -0.92537 |



|              |          |          |          |          |          |          |
|--------------|----------|----------|----------|----------|----------|----------|
| ILMN_1689651 | 0.07114  | 5.329057 | 3.727953 | 0.000492 | 0.023093 | -0.25427 |
| ILMN_1799669 | -0.07091 | 6.169469 | -3.60346 | 0.000722 | 0.029718 | -0.60451 |
| ILMN_1676594 | -0.07084 | 5.782597 | -3.51472 | 0.000944 | 0.034911 | -0.85001 |
| ILMN_1789955 | -0.07046 | 5.498019 | -3.40629 | 0.001306 | 0.042165 | -1.14506 |
| ILMN_2410905 | -0.07006 | 5.267522 | -3.38672 | 0.001384 | 0.043715 | -1.19773 |
| ILMN_1696767 | 0.069905 | 5.26613  | 3.404329 | 0.001314 | 0.042371 | -1.15036 |
| ILMN_1815570 | 0.069839 | 6.374613 | 3.476571 | 0.001059 | 0.037034 | -0.95445 |
| ILMN_1767441 | 0.069765 | 6.13581  | 3.68844  | 0.000556 | 0.024798 | -0.36614 |
| ILMN_2209766 | -0.06973 | 6.632917 | -3.48457 | 0.001034 | 0.036639 | -0.9326  |
| ILMN_3300358 | 0.069564 | 6.250778 | 3.482501 | 0.00104  | 0.036679 | -0.93826 |
| ILMN_1728802 | -0.06932 | 5.97848  | -3.48819 | 0.001023 | 0.036431 | -0.92272 |
| ILMN_1887128 | -0.06927 | 6.128285 | -3.8509  | 0.000335 | 0.018029 | 0.097944 |
| ILMN_1759312 | -0.06919 | 5.296898 | -3.40259 | 0.001321 | 0.042432 | -1.15504 |
| ILMN_2085446 | 0.06817  | 6.516636 | 3.3381   | 0.001598 | 0.047389 | -1.32776 |
| ILMN_1661002 | -0.06753 | 9.235879 | -3.52587 | 0.000913 | 0.034221 | -0.81936 |
| ILMN_1651498 | 0.066353 | 5.48707  | 3.320379 | 0.001683 | 0.048567 | -1.37487 |
| ILMN_3225014 | 0.066123 | 5.747072 | 3.42179  | 0.001247 | 0.040958 | -1.10324 |
| ILMN_1885908 | -0.06612 | 5.936269 | -3.58262 | 0.000769 | 0.031004 | -0.66247 |
| ILMN_1761844 | 0.066018 | 8.75912  | 3.485764 | 0.00103  | 0.036546 | -0.92934 |
| ILMN_1693319 | -0.06332 | 5.331141 | -3.46317 | 0.001103 | 0.037822 | -0.99097 |
| ILMN_2338849 | -0.06286 | 5.81064  | -3.59854 | 0.000733 | 0.030029 | -0.61822 |
| ILMN_1759801 | 0.062286 | 7.855688 | 3.456994 | 0.001123 | 0.038324 | -1.00778 |
| ILMN_2038773 | -0.06124 | 14.04246 | -3.33314 | 0.001621 | 0.047632 | -1.34095 |
| ILMN_2084912 | -0.05984 | 5.261935 | -3.4399  | 0.001182 | 0.03959  | -1.05419 |
| ILMN_3211262 | 0.059778 | 5.588309 | 3.351735 | 0.001535 | 0.046067 | -1.29142 |
| ILMN_1673042 | 0.059436 | 6.00835  | 3.618257 | 0.00069  | 0.028788 | -0.56322 |
| ILMN_2232084 | -0.05891 | 6.062851 | -3.64592 | 0.000634 | 0.027241 | -0.48578 |
| ILMN_2331501 | -0.0583  | 14.14271 | -3.45588 | 0.001127 | 0.038349 | -1.01083 |
| ILMN_1736234 | 0.055856 | 8.677606 | 3.471953 | 0.001074 | 0.037399 | -0.96705 |

**Supplementary Table S2. Genes showing significant concentration-dependent associations with levels of HPV16 E7 protein in the W12 clones.**

|              | logFC    | AveExpr  | t        | P.Value  | adj.P.Val | B        |
|--------------|----------|----------|----------|----------|-----------|----------|
| ILMN_2133205 | -0.69082 | 7.992169 | -5.43423 | 1.63E-06 | 0.00066   | 5.034165 |
| ILMN_1739513 | 0.604786 | 7.219708 | 8.736298 | 1.22E-11 | 4.21E-07  | 16.21005 |
| ILMN_1744604 | -0.58674 | 7.452409 | -6.36858 | 5.80E-08 | 6.22E-05  | 8.197195 |
| ILMN_2391861 | -0.58146 | 8.151042 | -4.66289 | 2.35E-05 | 0.003     | 2.51143  |
| ILMN_1725139 | 0.565743 | 6.326501 | 7.513792 | 9.38E-10 | 6.47E-06  | 12.10954 |
| ILMN_1773006 | -0.55724 | 10.33058 | -3.28438 | 0.001869 | 0.044572  | -1.56481 |
| ILMN_1705750 | -0.44125 | 9.719861 | -5.36966 | 2.04E-06 | 0.000741  | 4.818896 |
| ILMN_1668134 | -0.42785 | 6.914501 | -3.33398 | 0.001617 | 0.040663  | -1.43198 |
| ILMN_1788874 | 0.411575 | 7.706951 | 4.320598 | 7.37E-05 | 0.006356  | 1.436105 |
| ILMN_1658494 | -0.40806 | 8.771834 | -4.16641 | 0.000122 | 0.008526  | 0.963249 |
| ILMN_1705080 | -0.40105 | 8.187943 | -4.27217 | 8.65E-05 | 0.006983  | 1.286749 |
| ILMN_1772627 | -0.38929 | 8.074501 | -4.80845 | 1.43E-05 | 0.00235   | 2.978126 |
| ILMN_1762255 | -0.38743 | 7.106344 | -3.23094 | 0.002183 | 0.049513  | -1.70653 |
| ILMN_1812403 | -0.37152 | 9.949197 | -4.95218 | 8.74E-06 | 0.001684  | 3.44371  |
| ILMN_1682015 | 0.370871 | 8.023019 | 3.887879 | 0.000298 | 0.015374  | 0.130089 |
| ILMN_1673639 | -0.36746 | 7.225538 | -4.70704 | 2.02E-05 | 0.002835  | 2.652426 |
| ILMN_1671478 | -0.36556 | 8.875751 | -5.90923 | 3.01E-07 | 0.000206  | 6.633196 |
| ILMN_2072178 | 0.33632  | 7.401153 | 4.915263 | 9.93E-06 | 0.001858  | 3.323705 |
| ILMN_1680110 | -0.33061 | 10.90965 | -3.89325 | 0.000293 | 0.015188  | 0.145878 |
| ILMN_1775814 | -0.33047 | 8.011236 | -3.61178 | 0.000703 | 0.024698  | -0.66571 |
| ILMN_1806754 | 0.328635 | 8.880934 | 3.417994 | 0.001262 | 0.034602  | -1.20413 |
| ILMN_1722670 | -0.32843 | 7.524326 | -3.53337 | 0.000893 | 0.028185  | -0.88569 |
| ILMN_3249032 | 0.323525 | 7.755069 | 4.622503 | 2.69E-05 | 0.00328   | 2.382873 |
| ILMN_1699989 | -0.3222  | 8.280026 | -4.83682 | 1.30E-05 | 0.002206  | 3.069658 |
| ILMN_1754241 | 0.320601 | 7.183669 | 3.920537 | 0.000269 | 0.014425  | 0.226278 |
| ILMN_1705107 | -0.30974 | 8.0672   | -3.82376 | 0.000365 | 0.017052  | -0.05756 |
| ILMN_1790227 | -0.30943 | 8.273254 | -3.76294 | 0.000441 | 0.018974  | -0.23398 |
| ILMN_1693338 | 0.303947 | 8.093769 | 3.309336 | 0.001738 | 0.042499  | -1.49813 |
| ILMN_1766054 | -0.30186 | 7.521938 | -5.00198 | 7.36E-06 | 0.001515  | 3.606065 |
| ILMN_1744765 | -0.30137 | 11.11599 | -3.4151  | 0.001273 | 0.03479   | -1.21205 |
| ILMN_2242463 | 0.29533  | 10.18413 | 5.304838 | 2.57E-06 | 0.00082   | 4.603435 |
| ILMN_2096372 | -0.2941  | 6.843431 | -3.44507 | 0.001164 | 0.033106  | -1.12997 |
| ILMN_1690017 | -0.29005 | 8.585352 | -3.29798 | 0.001797 | 0.043525  | -1.52852 |
| ILMN_1735045 | -0.28713 | 7.475736 | -5.58536 | 9.54E-07 | 0.000439  | 5.540149 |
| ILMN_1805665 | -0.28221 | 9.899024 | -4.77299 | 1.62E-05 | 0.002454  | 2.863952 |
| ILMN_1737561 | -0.28016 | 7.754604 | -4.79629 | 1.49E-05 | 0.00235   | 2.93895  |
| ILMN_2138765 | 0.279582 | 7.772094 | 6.150264 | 1.27E-07 | 0.000102  | 7.452398 |
| ILMN_1666893 | 0.278934 | 6.466164 | 8.28675  | 5.95E-11 | 1.03E-06  | 14.7173  |
| ILMN_2390919 | -0.26961 | 7.823265 | -4.84969 | 1.24E-05 | 0.002198  | 3.11126  |
| ILMN_2304512 | 0.263785 | 8.426435 | 3.512194 | 0.000952 | 0.029398  | -0.9446  |
| ILMN_1713829 | -0.26237 | 9.390348 | -4.03236 | 0.000188 | 0.011595  | 0.558717 |
| ILMN_2376723 | -0.2572  | 9.075359 | -5.29087 | 2.69E-06 | 0.00084   | 4.557095 |
| ILMN_1651496 | -0.25572 | 9.321274 | -3.47469 | 0.001065 | 0.031169  | -1.04844 |
| ILMN_1696347 | 0.254268 | 9.758519 | 4.311322 | 7.60E-05 | 0.00644   | 1.407441 |
| ILMN_1706015 | -0.25198 | 7.100224 | -3.33518 | 0.001611 | 0.0406    | -1.42874 |
| ILMN_1711087 | -0.24569 | 8.94067  | -5.58842 | 9.44E-07 | 0.000439  | 5.550431 |
| ILMN_1774602 | -0.24503 | 8.368134 | -4.83402 | 1.31E-05 | 0.002206  | 3.060615 |
| ILMN_1808590 | 0.244658 | 7.188088 | 3.810764 | 0.00038  | 0.017435  | -0.09537 |
| ILMN_1773337 | -0.24373 | 11.82517 | -4.07271 | 0.000165 | 0.010504  | 0.679826 |
| ILMN_1789400 | -0.23944 | 7.093376 | -3.69495 | 0.000545 | 0.021487  | -0.4294  |

|              |          |          |          |          |          |          |
|--------------|----------|----------|----------|----------|----------|----------|
| ILMN_2214197 | -0.23937 | 7.404584 | -5.38227 | 1.95E-06 | 0.000724 | 4.860907 |
| ILMN_1660067 | 0.239114 | 7.137712 | 4.83418  | 1.31E-05 | 0.002206 | 3.061129 |
| ILMN_1667966 | -0.23757 | 7.760319 | -5.39507 | 1.87E-06 | 0.000716 | 4.903541 |
| ILMN_1760990 | -0.23727 | 6.710187 | -5.28976 | 2.70E-06 | 0.00084  | 4.553421 |
| ILMN_1776121 | -0.23717 | 7.409774 | -3.69834 | 0.000539 | 0.021346 | -0.41968 |
| ILMN_1798006 | -0.23447 | 7.928236 | -3.73458 | 0.000482 | 0.019833 | -0.31574 |
| ILMN_3244348 | 0.232543 | 8.046509 | 6.477717 | 3.92E-08 | 5.36E-05 | 8.570171 |
| ILMN_1723123 | -0.23142 | 10.92282 | -5.38191 | 1.96E-06 | 0.000724 | 4.859691 |
| ILMN_1751086 | 0.230311 | 9.493877 | 5.759145 | 5.15E-07 | 0.000306 | 6.125371 |
| ILMN_3227023 | -0.23002 | 9.465506 | -5.6941  | 6.49E-07 | 0.000367 | 5.905962 |
| ILMN_3234089 | -0.22814 | 7.081691 | -4.22294 | 0.000102 | 0.00739  | 1.135726 |
| ILMN_1661599 | -0.22804 | 11.56727 | -4.24551 | 9.44E-05 | 0.007245 | 1.204875 |
| ILMN_1743103 | -0.2251  | 10.09195 | -4.85508 | 1.22E-05 | 0.002169 | 3.128682 |
| ILMN_3242586 | -0.2251  | 6.789435 | -3.67337 | 0.000582 | 0.022311 | -0.49099 |
| ILMN_1800130 | -0.22448 | 7.260117 | -4.68204 | 2.20E-05 | 0.002875 | 2.572544 |
| ILMN_1799098 | -0.22444 | 10.47357 | -6.66432 | 2.00E-08 | 3.45E-05 | 9.208465 |
| ILMN_3243156 | -0.22431 | 10.01686 | -5.94739 | 2.63E-07 | 0.000193 | 6.762596 |
| ILMN_1800317 | -0.2235  | 6.100468 | -4.73142 | 1.86E-05 | 0.002686 | 2.730501 |
| ILMN_3305614 | -0.22337 | 6.399203 | -3.95793 | 0.000239 | 0.013337 | 0.336928 |
| ILMN_1695945 | -0.2213  | 6.886069 | -6.48123 | 3.87E-08 | 5.36E-05 | 8.582193 |
| ILMN_1790100 | 0.219813 | 8.226173 | 5.730934 | 5.69E-07 | 0.000327 | 6.030154 |
| ILMN_2160209 | 0.219491 | 6.731097 | 4.859042 | 1.20E-05 | 0.002151 | 3.141487 |
| ILMN_1699651 | 0.21889  | 6.608253 | 3.239464 | 0.00213  | 0.048563 | -1.68402 |
| ILMN_1794742 | -0.21841 | 8.365627 | -4.45683 | 4.69E-05 | 0.004731 | 1.860089 |
| ILMN_1700583 | 0.218227 | 9.328275 | 3.818623 | 0.000371 | 0.017189 | -0.07251 |
| ILMN_1721876 | -0.21636 | 8.700419 | -5.12289 | 4.84E-06 | 0.001192 | 4.002272 |
| ILMN_1714108 | -0.21597 | 7.661412 | -5.62776 | 8.21E-07 | 0.000399 | 5.682634 |
| ILMN_1777233 | 0.215541 | 8.912187 | 6.414197 | 4.92E-08 | 5.66E-05 | 8.353047 |
| ILMN_1856480 | -0.21465 | 7.171697 | -3.95397 | 0.000242 | 0.01341  | 0.32518  |
| ILMN_1749096 | 0.212726 | 6.532685 | 3.97445  | 0.000227 | 0.013051 | 0.385978 |
| ILMN_1708934 | -0.21218 | 11.66936 | -4.5563  | 3.37E-05 | 0.00377  | 2.173058 |
| ILMN_1693471 | 0.21188  | 8.402875 | 3.659053 | 0.000609 | 0.022886 | -0.53176 |
| ILMN_1781285 | -0.20738 | 10.96082 | -3.97081 | 0.000229 | 0.013128 | 0.375172 |
| ILMN_1711069 | -0.20737 | 9.757086 | -4.36535 | 6.36E-05 | 0.005842 | 1.574779 |
| ILMN_2095610 | -0.20575 | 9.971736 | -6.18361 | 1.13E-07 | 9.26E-05 | 7.566012 |
| ILMN_1810725 | -0.20455 | 7.339041 | -4.12605 | 0.000139 | 0.009322 | 0.840803 |
| ILMN_1799105 | -0.20401 | 9.237549 | -5.03218 | 6.63E-06 | 0.001469 | 3.704784 |
| ILMN_2186983 | -0.20334 | 10.29542 | -5.87973 | 3.35E-07 | 0.000218 | 6.533227 |
| ILMN_1678655 | -0.20262 | 9.884598 | -3.29778 | 0.001798 | 0.043525 | -1.52904 |
| ILMN_3224926 | 0.20202  | 8.871704 | 4.83587  | 1.30E-05 | 0.002206 | 3.066589 |
| ILMN_3242004 | -0.20153 | 9.102102 | -5.68    | 6.82E-07 | 0.000373 | 5.858434 |
| ILMN_3236858 | -0.20108 | 6.435354 | -3.82872 | 0.000359 | 0.01695  | -0.04308 |
| ILMN_1739450 | -0.20096 | 9.157353 | -6.31927 | 6.93E-08 | 6.64E-05 | 8.028776 |
| ILMN_1788955 | -0.20086 | 10.90429 | -5.13789 | 4.60E-06 | 0.001173 | 4.051633 |
| ILMN_1772910 | -0.19989 | 8.398031 | -4.43332 | 5.08E-05 | 0.004903 | 1.786511 |
| ILMN_3306730 | 0.198534 | 8.639006 | 4.871314 | 1.15E-05 | 0.002095 | 3.181203 |
| ILMN_1722834 | -0.19831 | 8.939424 | -4.69948 | 2.08E-05 | 0.002859 | 2.628261 |
| ILMN_1759513 | 0.198056 | 10.91744 | 3.254032 | 0.002042 | 0.047308 | -1.64547 |
| ILMN_1675616 | 0.197984 | 6.875555 | 4.674844 | 2.26E-05 | 0.002935 | 2.549559 |
| ILMN_1751161 | -0.19614 | 10.99825 | -4.41417 | 5.41E-05 | 0.00517  | 1.726716 |
| ILMN_1770085 | -0.19605 | 8.319791 | -3.26564 | 0.001974 | 0.046396 | -1.61468 |
| ILMN_1657766 | -0.19599 | 10.09657 | -4.69623 | 2.10E-05 | 0.002859 | 2.617875 |
| ILMN_1691476 | -0.1953  | 7.248167 | -3.41374 | 0.001278 | 0.034875 | -1.21575 |
| ILMN_1793017 | -0.19524 | 7.235809 | -6.33936 | 6.45E-08 | 6.35E-05 | 8.097384 |

|              |          |          |          |          |          |          |
|--------------|----------|----------|----------|----------|----------|----------|
| ILMN_1696270 | -0.1952  | 8.109972 | -6.44449 | 4.42E-08 | 5.49E-05 | 8.456579 |
| ILMN_2413816 | 0.194739 | 6.652781 | 4.318761 | 7.42E-05 | 0.006379 | 1.430427 |
| ILMN_1705213 | -0.19343 | 8.975996 | -6.43922 | 4.50E-08 | 5.49E-05 | 8.438583 |
| ILMN_1749109 | -0.19245 | 11.15245 | -6.46916 | 4.04E-08 | 5.36E-05 | 8.54091  |
| ILMN_1790962 | 0.191401 | 6.6506   | 4.07715  | 0.000163 | 0.010374 | 0.693189 |
| ILMN_1663080 | -0.19126 | 8.308611 | -5.00278 | 7.34E-06 | 0.001515 | 3.60869  |
| ILMN_1791580 | -0.19116 | 7.516767 | -4.13949 | 0.000133 | 0.009067 | 0.881531 |
| ILMN_1792679 | 0.190885 | 7.392167 | 5.616248 | 8.55E-07 | 0.00041  | 5.643927 |
| ILMN_1672908 | -0.19003 | 6.931672 | -3.88584 | 0.0003   | 0.015385 | 0.124108 |
| ILMN_1788192 | -0.18993 | 6.735082 | -4.17144 | 0.00012  | 0.008436 | 0.97857  |
| ILMN_1729217 | -0.18965 | 6.33715  | -3.90235 | 0.000285 | 0.014932 | 0.172648 |
| ILMN_1773959 | 0.189189 | 5.740913 | 7.359984 | 1.63E-09 | 9.37E-06 | 11.58599 |
| ILMN_1731640 | -0.18888 | 8.258374 | -3.58377 | 0.000766 | 0.025767 | -0.74462 |
| ILMN_1686555 | -0.18878 | 6.820999 | -5.60347 | 8.95E-07 | 0.000423 | 5.600991 |
| ILMN_1799106 | 0.188677 | 7.097389 | 5.035171 | 6.56E-06 | 0.001469 | 3.714553 |
| ILMN_1685540 | 0.188063 | 7.832534 | 6.992856 | 6.12E-09 | 1.81E-05 | 10.3325  |
| ILMN_1775114 | -0.188   | 7.008211 | -4.75929 | 1.69E-05 | 0.002506 | 2.819925 |
| ILMN_1771841 | 0.187995 | 7.982244 | 3.41137  | 0.001287 | 0.035066 | -1.22222 |
| ILMN_2355559 | -0.18768 | 11.20146 | -5.51953 | 1.20E-06 | 0.000513 | 5.319404 |
| ILMN_1678669 | 0.186617 | 7.8982   | 4.43909  | 4.98E-05 | 0.004864 | 1.804564 |
| ILMN_1791912 | -0.18606 | 8.240175 | -5.52796 | 1.17E-06 | 0.000513 | 5.347627 |
| ILMN_2365686 | 0.185661 | 9.254504 | 4.583386 | 3.07E-05 | 0.003615 | 2.258766 |
| ILMN_1775883 | -0.18527 | 6.818445 | -3.78039 | 0.000418 | 0.018383 | -0.1835  |
| ILMN_1741755 | -0.1847  | 9.953249 | -5.34893 | 2.20E-06 | 0.000773 | 4.749915 |
| ILMN_1709307 | -0.18441 | 7.171161 | -3.70652 | 0.000526 | 0.020981 | -0.39628 |
| ILMN_1651282 | -0.18413 | 11.50699 | -4.17091 | 0.00012  | 0.008436 | 0.97696  |
| ILMN_2180371 | 0.183056 | 7.825553 | 4.364052 | 6.39E-05 | 0.005842 | 1.570734 |
| ILMN_1778360 | -0.18193 | 10.85475 | -4.37546 | 6.15E-05 | 0.005671 | 1.606189 |
| ILMN_1676361 | -0.18146 | 7.368993 | -5.37935 | 1.97E-06 | 0.000724 | 4.85116  |
| ILMN_3248857 | 0.180974 | 6.346806 | 6.936005 | 7.51E-09 | 1.85E-05 | 10.13807 |
| ILMN_1692938 | 0.180921 | 8.625168 | 5.423327 | 1.69E-06 | 0.000678 | 4.997764 |
| ILMN_1669433 | -0.1808  | 8.764554 | -5.3225  | 2.41E-06 | 0.000807 | 4.662078 |
| ILMN_1787265 | -0.17995 | 8.776492 | -4.12445 | 0.00014  | 0.009352 | 0.835972 |
| ILMN_1886515 | -0.17976 | 8.070173 | -4.52877 | 3.69E-05 | 0.003964 | 2.086157 |
| ILMN_2342437 | 0.179462 | 7.164944 | 5.106722 | 5.12E-06 | 0.001243 | 3.949136 |
| ILMN_2330307 | 0.179246 | 7.789457 | 4.218577 | 0.000103 | 0.007459 | 1.122367 |
| ILMN_1657111 | -0.17843 | 10.45706 | -4.69733 | 2.09E-05 | 0.002859 | 2.621369 |
| ILMN_2125346 | -0.17823 | 6.785924 | -3.74013 | 0.000474 | 0.019682 | -0.29977 |
| ILMN_3251691 | 0.177897 | 7.470628 | 4.456043 | 4.71E-05 | 0.004731 | 1.857622 |
| ILMN_1711994 | 0.177382 | 7.334314 | 5.234759 | 3.28E-06 | 0.000942 | 4.371233 |
| ILMN_3233388 | 0.176453 | 8.969333 | 6.739198 | 1.53E-08 | 3.00E-05 | 9.464694 |
| ILMN_2390974 | -0.17632 | 9.158101 | -5.10866 | 5.09E-06 | 0.001243 | 3.955506 |
| ILMN_1704537 | 0.174733 | 9.658634 | 3.558423 | 0.000828 | 0.026893 | -0.8157  |
| ILMN_2376050 | -0.17442 | 8.043913 | -3.95766 | 0.000239 | 0.013337 | 0.336136 |
| ILMN_1692026 | 0.17425  | 7.547477 | 7.133646 | 3.68E-09 | 1.59E-05 | 10.8137  |
| ILMN_1671365 | -0.17389 | 8.105262 | -3.51116 | 0.000955 | 0.029437 | -0.94748 |
| ILMN_1749118 | 0.17385  | 6.735765 | 3.493218 | 0.001008 | 0.030417 | -0.99722 |
| ILMN_1680018 | -0.17329 | 8.648107 | -3.8779  | 0.000308 | 0.015586 | 0.100767 |
| ILMN_1724139 | 0.172771 | 11.04195 | 5.130282 | 4.72E-06 | 0.001179 | 4.026586 |
| ILMN_2326712 | 0.17267  | 7.108977 | 4.557986 | 3.35E-05 | 0.00377  | 2.178398 |
| ILMN_3241441 | -0.17242 | 6.992044 | -4.47995 | 4.35E-05 | 0.004446 | 1.932592 |
| ILMN_1809695 | -0.17203 | 8.243369 | -4.09578 | 0.000154 | 0.010009 | 0.749326 |
| ILMN_1698732 | 0.171964 | 9.841955 | 4.398668 | 5.70E-05 | 0.005349 | 1.678395 |
| ILMN_1664861 | -0.17179 | 10.51662 | -4.25603 | 9.12E-05 | 0.007161 | 1.237156 |

|              |          |          |          |          |          |          |
|--------------|----------|----------|----------|----------|----------|----------|
| ILMN_3201453 | 0.17156  | 9.408963 | 4.976452 | 8.04E-06 | 0.001575 | 3.522787 |
| ILMN_2131177 | 0.170944 | 6.861966 | 3.579755 | 0.000776 | 0.025861 | -0.75589 |
| ILMN_1690289 | -0.17082 | 8.508461 | -4.13944 | 0.000133 | 0.009067 | 0.881354 |
| ILMN_1811195 | -0.17078 | 6.387587 | -6.00066 | 2.17E-07 | 0.000163 | 6.943471 |
| ILMN_1732609 | -0.17036 | 7.328232 | -4.30722 | 7.71E-05 | 0.00648  | 1.394789 |
| ILMN_1903021 | -0.17026 | 6.660383 | -4.92803 | 9.50E-06 | 0.00181  | 3.365175 |
| ILMN_1754842 | -0.17009 | 7.573756 | -5.85803 | 3.62E-07 | 0.000231 | 6.459745 |
| ILMN_1723412 | -0.16989 | 8.099925 | -4.09827 | 0.000152 | 0.009966 | 0.756831 |
| ILMN_1737283 | -0.16984 | 8.270082 | -3.43375 | 0.001204 | 0.033496 | -1.16102 |
| ILMN_1797822 | -0.16982 | 7.703849 | -3.59817 | 0.000733 | 0.025232 | -0.7041  |
| ILMN_1788931 | -0.16947 | 6.978091 | -3.7668  | 0.000436 | 0.018842 | -0.22282 |
| ILMN_2087941 | -0.16922 | 7.976439 | -4.33884 | 6.94E-05 | 0.00617  | 1.492556 |
| ILMN_1838942 | 0.168967 | 7.333424 | 3.626232 | 0.000673 | 0.024223 | -0.62487 |
| ILMN_2151281 | -0.1688  | 7.544569 | -3.64088 | 0.000644 | 0.023685 | -0.58337 |
| ILMN_1673522 | 0.168706 | 8.374233 | 6.962167 | 6.83E-09 | 1.81E-05 | 10.22755 |
| ILMN_1685413 | 0.168322 | 9.058596 | 5.340976 | 2.26E-06 | 0.000787 | 4.723477 |
| ILMN_1700310 | -0.16806 | 6.956644 | -3.32055 | 0.001682 | 0.04148  | -1.46807 |
| ILMN_1800091 | 0.167428 | 6.191857 | 6.115847 | 1.44E-07 | 0.000113 | 7.335192 |
| ILMN_1865764 | -0.16725 | 7.97774  | -5.24706 | 3.14E-06 | 0.000933 | 4.411935 |
| ILMN_1789775 | 0.167218 | 8.644515 | 4.804303 | 1.45E-05 | 0.00235  | 2.96475  |
| ILMN_1801077 | 0.167033 | 6.694603 | 6.73163  | 1.57E-08 | 3.00E-05 | 9.438796 |
| ILMN_1673543 | 0.16702  | 8.339837 | 6.300342 | 7.42E-08 | 6.91E-05 | 7.964174 |
| ILMN_3305273 | 0.166488 | 7.434981 | 6.485871 | 3.80E-08 | 5.36E-05 | 8.59805  |
| ILMN_2176502 | -0.1662  | 6.956946 | -4.09827 | 0.000152 | 0.009966 | 0.756842 |
| ILMN_2404065 | -0.16515 | 9.856242 | -6.21103 | 1.02E-07 | 8.81E-05 | 7.659478 |
| ILMN_2219466 | 0.16488  | 6.618042 | 4.044641 | 0.000181 | 0.011207 | 0.595524 |
| ILMN_1706051 | -0.16481 | 6.646429 | -3.40728 | 0.001302 | 0.03535  | -1.23338 |
| ILMN_1673673 | 0.164412 | 7.439336 | 4.492771 | 4.16E-05 | 0.004324 | 1.972855 |
| ILMN_2217935 | 0.164017 | 8.484241 | 6.213782 | 1.01E-07 | 8.81E-05 | 7.668869 |
| ILMN_1738955 | -0.1635  | 8.396592 | -5.78486 | 4.70E-07 | 0.000284 | 6.212235 |
| ILMN_1682402 | 0.163494 | 6.554808 | 7.152685 | 3.44E-09 | 1.59E-05 | 10.87874 |
| ILMN_1679093 | -0.16337 | 9.146616 | -4.28094 | 8.40E-05 | 0.006881 | 1.313749 |
| ILMN_3200421 | 0.163289 | 7.335807 | 5.135903 | 4.63E-06 | 0.001173 | 4.045081 |
| ILMN_1781400 | -0.1632  | 6.351035 | -3.34121 | 0.001583 | 0.040178 | -1.4125  |
| ILMN_2209578 | -0.16293 | 8.965183 | -6.48365 | 3.83E-08 | 5.36E-05 | 8.590467 |
| ILMN_3238707 | 0.162413 | 7.42062  | 5.662761 | 7.25E-07 | 0.000373 | 5.800397 |
| ILMN_2158705 | -0.16184 | 7.68826  | -4.01645 | 0.000198 | 0.012009 | 0.511149 |
| ILMN_2128967 | -0.16154 | 9.231968 | -3.88292 | 0.000303 | 0.015432 | 0.115507 |
| ILMN_1669888 | -0.16147 | 9.58316  | -3.92999 | 0.000261 | 0.014176 | 0.254189 |
| ILMN_1769451 | 0.16129  | 8.506642 | 6.994714 | 6.08E-09 | 1.81E-05 | 10.33885 |
| ILMN_2401878 | 0.161226 | 8.20921  | 4.839888 | 1.29E-05 | 0.002206 | 3.079567 |
| ILMN_3242883 | -0.16121 | 8.583161 | -5.66718 | 7.14E-07 | 0.000373 | 5.815265 |
| ILMN_1781386 | -0.1611  | 7.357152 | -3.75741 | 0.000449 | 0.019184 | -0.24994 |
| ILMN_1683450 | 0.160863 | 9.802312 | 5.193307 | 3.79E-06 | 0.001045 | 4.234263 |
| ILMN_2134039 | 0.159434 | 9.220499 | 3.585713 | 0.000762 | 0.025703 | -0.73915 |
| ILMN_1658426 | -0.15894 | 6.566176 | -3.84897 | 0.000337 | 0.016315 | 0.016023 |
| ILMN_1707350 | -0.1589  | 7.336674 | -4.25202 | 9.24E-05 | 0.007221 | 1.224839 |
| ILMN_1756541 | -0.1586  | 8.567317 | -5.03776 | 6.51E-06 | 0.001469 | 3.723021 |
| ILMN_1772036 | 0.158129 | 6.536796 | 4.559152 | 3.33E-05 | 0.00377  | 2.182082 |
| ILMN_1654262 | -0.15806 | 8.417803 | -4.54855 | 3.45E-05 | 0.003854 | 2.148588 |
| ILMN_1667295 | -0.15754 | 7.862332 | -3.47766 | 0.001056 | 0.031069 | -1.04024 |
| ILMN_1748352 | -0.15739 | 11.41013 | -3.79721 | 0.000397 | 0.017953 | -0.13477 |
| ILMN_1775405 | -0.15729 | 9.581759 | -4.54356 | 3.51E-05 | 0.003881 | 2.132827 |
| ILMN_1778543 | 0.157284 | 8.784348 | 4.260866 | 8.97E-05 | 0.007096 | 1.25201  |

|              |          |          |          |          |          |          |
|--------------|----------|----------|----------|----------|----------|----------|
| ILMN_2214678 | -0.15721 | 7.753444 | -3.24548 | 0.002093 | 0.048075 | -1.66812 |
| ILMN_2072622 | 0.157172 | 9.12022  | 4.198378 | 0.00011  | 0.007858 | 1.060656 |
| ILMN_2357134 | 0.156518 | 7.806797 | 3.527337 | 0.000909 | 0.028593 | -0.90249 |
| ILMN_2401873 | 0.156332 | 8.387228 | 4.104447 | 0.000149 | 0.009825 | 0.775486 |
| ILMN_1671404 | 0.156071 | 9.585143 | 3.870029 | 0.000316 | 0.015838 | 0.077687 |
| ILMN_1715684 | -0.15592 | 9.932007 | -3.56071 | 0.000822 | 0.026754 | -0.80929 |
| ILMN_1655622 | 0.155651 | 9.877114 | 4.797425 | 1.49E-05 | 0.00235  | 2.94259  |
| ILMN_1712888 | -0.15557 | 10.95199 | -3.3531  | 0.001529 | 0.0393   | -1.38043 |
| ILMN_1802205 | -0.15557 | 9.479563 | -3.81933 | 0.00037  | 0.017174 | -0.07044 |
| ILMN_3235404 | 0.155367 | 7.050826 | 5.382649 | 1.95E-06 | 0.000724 | 4.862154 |
| ILMN_2121816 | -0.1549  | 6.828963 | -5.92802 | 2.82E-07 | 0.000202 | 6.696901 |
| ILMN_1663866 | -0.15472 | 12.16059 | -3.51728 | 0.000937 | 0.029134 | -0.93048 |
| ILMN_1716026 | -0.15454 | 7.359713 | -5.03064 | 6.67E-06 | 0.001469 | 3.699736 |
| ILMN_1678922 | -0.15433 | 8.85559  | -4.4271  | 5.18E-05 | 0.004991 | 1.767087 |
| ILMN_2413898 | 0.153064 | 8.123873 | 4.091501 | 0.000156 | 0.010072 | 0.736422 |
| ILMN_1669703 | -0.15303 | 8.590866 | -5.21128 | 3.56E-06 | 0.000997 | 4.29362  |
| ILMN_1682038 | 0.152626 | 8.374774 | 5.274188 | 2.86E-06 | 0.000871 | 4.501779 |
| ILMN_1685580 | -0.15249 | 7.69523  | -5.92334 | 2.87E-07 | 0.000202 | 6.681021 |
| ILMN_1665775 | 0.152172 | 6.339835 | 3.715604 | 0.000511 | 0.020688 | -0.37024 |
| ILMN_2413899 | 0.151897 | 6.61334  | 4.608783 | 2.82E-05 | 0.0034   | 2.339299 |
| ILMN_1778087 | -0.15175 | 12.66377 | -4.56805 | 3.23E-05 | 0.003718 | 2.21022  |
| ILMN_1708672 | 0.15109  | 9.817585 | 3.752235 | 0.000456 | 0.019328 | -0.26488 |
| ILMN_1696713 | 0.150861 | 7.818523 | 5.154864 | 4.33E-06 | 0.00114  | 4.107506 |
| ILMN_1712305 | -0.15068 | 9.841136 | -3.33095 | 0.001631 | 0.040776 | -1.44011 |
| ILMN_1710284 | -0.15068 | 8.130457 | -3.43157 | 0.001212 | 0.033552 | -1.167   |
| ILMN_1729225 | -0.1505  | 6.254295 | -4.30285 | 7.82E-05 | 0.00651  | 1.381284 |
| ILMN_2229379 | -0.15049 | 6.13363  | -3.40129 | 0.001326 | 0.035568 | -1.2497  |
| ILMN_3247848 | -0.15014 | 6.89447  | -4.59558 | 2.95E-05 | 0.003505 | 2.297401 |
| ILMN_1694840 | -0.15003 | 7.088939 | -3.65641 | 0.000614 | 0.022995 | -0.53928 |
| ILMN_3250268 | 0.149967 | 7.791705 | 4.080781 | 0.000161 | 0.010291 | 0.70412  |
| ILMN_1763907 | 0.149787 | 10.09857 | 5.881885 | 3.32E-07 | 0.000218 | 6.540521 |
| ILMN_1774685 | 0.149769 | 6.321316 | 4.344314 | 6.82E-05 | 0.006106 | 1.509511 |
| ILMN_1810942 | -0.1497  | 6.842908 | -3.49241 | 0.00101  | 0.030438 | -0.99947 |
| ILMN_1682165 | -0.14956 | 9.81225  | -4.01714 | 0.000198 | 0.012004 | 0.513196 |
| ILMN_1805828 | 0.148963 | 8.975599 | 4.704549 | 2.04E-05 | 0.002847 | 2.644465 |
| ILMN_1657708 | -0.14885 | 6.507068 | -3.34318 | 0.001574 | 0.040075 | -1.40718 |
| ILMN_2217809 | 0.14768  | 9.865297 | 3.739592 | 0.000475 | 0.019688 | -0.30131 |
| ILMN_1760620 | 0.147482 | 7.638822 | 5.459609 | 1.49E-06 | 0.000611 | 5.118913 |
| ILMN_2380588 | 0.147387 | 8.905956 | 5.521962 | 1.19E-06 | 0.000513 | 5.327534 |
| ILMN_1668629 | -0.14715 | 9.24065  | -3.58448 | 0.000765 | 0.025761 | -0.74263 |
| ILMN_1809866 | 0.146879 | 8.354651 | 4.989749 | 7.68E-06 | 0.001531 | 3.566154 |
| ILMN_1664369 | 0.146224 | 6.806388 | 5.00212  | 7.36E-06 | 0.001515 | 3.606532 |
| ILMN_1800412 | -0.14598 | 7.86545  | -7.84265 | 2.89E-10 | 2.49E-06 | 13.22439 |
| ILMN_1682738 | -0.14562 | 8.942544 | -4.35279 | 6.63E-05 | 0.005984 | 1.535802 |
| ILMN_1669479 | 0.145339 | 7.352698 | 3.886307 | 0.0003   | 0.015385 | 0.125467 |
| ILMN_1759419 | 0.145267 | 8.841508 | 6.045602 | 1.85E-07 | 0.000142 | 7.0962   |
| ILMN_1794914 | -0.14514 | 7.949059 | -4.30191 | 7.84E-05 | 0.00651  | 1.378372 |
| ILMN_1711314 | 0.145106 | 9.227916 | 4.43504  | 5.05E-05 | 0.004896 | 1.791903 |
| ILMN_1731433 | -0.14429 | 6.346302 | -3.85397 | 0.000332 | 0.016239 | 0.030659 |
| ILMN_1726839 | 0.144183 | 10.39428 | 4.06322  | 0.000171 | 0.01075  | 0.651294 |
| ILMN_1725193 | -0.144   | 10.1647  | -6.36167 | 5.95E-08 | 6.22E-05 | 8.173573 |
| ILMN_1782403 | 0.143901 | 7.30588  | 4.576613 | 3.14E-05 | 0.00367  | 2.237319 |
| ILMN_1685722 | -0.14378 | 11.69208 | -5.02326 | 6.84E-06 | 0.001483 | 3.675585 |
| ILMN_1693630 | -0.14376 | 6.773813 | -3.63516 | 0.000655 | 0.023869 | -0.59958 |

|              |          |          |          |          |          |          |
|--------------|----------|----------|----------|----------|----------|----------|
| ILMN_1810392 | 0.143717 | 7.699965 | 4.916121 | 9.90E-06 | 0.001858 | 3.32649  |
| ILMN_1681249 | -0.1436  | 8.864681 | -5.66919 | 7.09E-07 | 0.000373 | 5.822042 |
| ILMN_1744211 | -0.14349 | 6.010109 | -3.92264 | 0.000267 | 0.014374 | 0.23249  |
| ILMN_1683127 | 0.143341 | 9.525091 | 3.332825 | 0.001623 | 0.040674 | -1.43508 |
| ILMN_1733519 | 0.143145 | 7.128569 | 5.31953  | 2.44E-06 | 0.000808 | 4.652212 |
| ILMN_1796417 | 0.143136 | 8.302821 | 4.688061 | 2.16E-05 | 0.00287  | 2.591759 |
| ILMN_1656482 | -0.14267 | 8.367446 | -4.64741 | 2.48E-05 | 0.003081 | 2.462092 |
| ILMN_1719938 | 0.142397 | 6.741639 | 4.097019 | 0.000153 | 0.009988 | 0.753065 |
| ILMN_2371055 | -0.14236 | 10.52178 | -4.91392 | 9.97E-06 | 0.001858 | 3.319338 |
| ILMN_2166524 | 0.142351 | 7.416898 | 4.842202 | 1.28E-05 | 0.002206 | 3.087044 |
| ILMN_1765109 | -0.14229 | 8.299028 | -3.85024 | 0.000336 | 0.016288 | 0.019744 |
| ILMN_2224657 | 0.141857 | 6.722118 | 3.499253 | 0.000989 | 0.030107 | -0.9805  |
| ILMN_2124352 | 0.141684 | 10.23923 | 4.270792 | 8.69E-05 | 0.006983 | 1.282523 |
| ILMN_1695386 | 0.141533 | 8.615201 | 7.069179 | 4.65E-09 | 1.78E-05 | 10.59342 |
| ILMN_2214910 | -0.1415  | 8.086097 | -3.96892 | 0.000231 | 0.013128 | 0.369559 |
| ILMN_1809344 | -0.14144 | 8.703744 | -6.18943 | 1.10E-07 | 9.26E-05 | 7.585849 |
| ILMN_2287653 | -0.14067 | 6.690452 | -4.69041 | 2.14E-05 | 0.00287  | 2.599276 |
| ILMN_1784847 | 0.140526 | 7.592238 | 5.158274 | 4.28E-06 | 0.001135 | 4.118739 |
| ILMN_1773906 | -0.14038 | 11.75633 | -4.76022 | 1.69E-05 | 0.002506 | 2.822902 |
| ILMN_2203588 | -0.14027 | 6.67429  | -4.69825 | 2.08E-05 | 0.002859 | 2.624321 |
| ILMN_1651346 | -0.13997 | 6.717753 | -4.52618 | 3.72E-05 | 0.003986 | 2.078007 |
| ILMN_1678671 | -0.13987 | 7.812516 | -3.60326 | 0.000722 | 0.025018 | -0.68974 |
| ILMN_2134974 | 0.139836 | 10.82826 | 3.239887 | 0.002127 | 0.048536 | -1.6829  |
| ILMN_2348050 | 0.139666 | 9.946905 | 3.96914  | 0.000231 | 0.013128 | 0.370199 |
| ILMN_2062701 | -0.13922 | 7.849424 | -3.53939 | 0.000877 | 0.027932 | -0.8689  |
| ILMN_1775522 | -0.13888 | 9.771732 | -5.24958 | 3.11E-06 | 0.000933 | 4.420277 |
| ILMN_3306482 | 0.138855 | 10.27699 | 3.644426 | 0.000637 | 0.023549 | -0.57332 |
| ILMN_3233229 | -0.13879 | 7.717482 | -4.75466 | 1.72E-05 | 0.002529 | 2.80505  |
| ILMN_1803194 | 0.138674 | 8.461656 | 5.353379 | 2.16E-06 | 0.000769 | 4.764725 |
| ILMN_1779677 | -0.13867 | 7.562899 | -3.44063 | 0.001179 | 0.033218 | -1.14216 |
| ILMN_2404063 | -0.13852 | 9.331987 | -6.68381 | 1.86E-08 | 3.38E-05 | 9.275155 |
| ILMN_1732967 | -0.13843 | 8.497603 | -5.03532 | 6.56E-06 | 0.001469 | 3.715027 |
| ILMN_1770206 | 0.138378 | 9.242454 | 6.593717 | 2.58E-08 | 4.23E-05 | 8.966905 |
| ILMN_1731349 | -0.13828 | 6.896797 | -3.36411 | 0.00148  | 0.038388 | -1.35065 |
| ILMN_2414533 | -0.13819 | 7.051803 | -5.19975 | 3.70E-06 | 0.00103  | 4.255521 |
| ILMN_1719344 | -0.13802 | 8.761622 | -4.33206 | 7.10E-05 | 0.006248 | 1.47157  |
| ILMN_2409220 | 0.137836 | 9.171432 | 3.376778 | 0.001426 | 0.03743  | -1.31634 |
| ILMN_2297626 | 0.137796 | 7.303479 | 3.294644 | 0.001814 | 0.043772 | -1.53743 |
| ILMN_1803018 | -0.13777 | 8.220185 | -4.37754 | 6.11E-05 | 0.005647 | 1.612654 |
| ILMN_1744835 | 0.137732 | 11.05111 | 4.597184 | 2.93E-05 | 0.003499 | 2.302496 |
| ILMN_2103397 | -0.13764 | 6.499243 | -5.00804 | 7.21E-06 | 0.001515 | 3.625858 |
| ILMN_1723971 | 0.137599 | 8.306865 | 3.794034 | 0.000401 | 0.01801  | -0.14397 |
| ILMN_2079285 | -0.13755 | 9.10756  | -3.57024 | 0.000798 | 0.026314 | -0.78259 |
| ILMN_3237385 | -0.13732 | 8.080546 | -5.10481 | 5.16E-06 | 0.001243 | 3.94287  |
| ILMN_1730824 | 0.137295 | 7.513409 | 4.136144 | 0.000135 | 0.009129 | 0.871375 |
| ILMN_1742577 | 0.13725  | 10.20435 | 4.865068 | 1.18E-05 | 0.002118 | 3.160985 |
| ILMN_2334760 | -0.13708 | 6.781816 | -3.49614 | 0.000999 | 0.03026  | -0.98914 |
| ILMN_1711005 | 0.136866 | 7.497246 | 3.885578 | 0.000301 | 0.015385 | 0.123327 |
| ILMN_1797236 | -0.13677 | 6.569355 | -3.821   | 0.000368 | 0.017154 | -0.06557 |
| ILMN_1667319 | -0.1366  | 6.22959  | -4.53741 | 3.59E-05 | 0.003912 | 2.113413 |
| ILMN_1903914 | 0.136455 | 7.610041 | 3.330797 | 0.001632 | 0.040776 | -1.44053 |
| ILMN_2074044 | 0.136381 | 7.061313 | 4.131127 | 0.000137 | 0.009224 | 0.856174 |
| ILMN_1739805 | -0.13634 | 8.701651 | -4.80755 | 1.44E-05 | 0.00235  | 2.975208 |
| ILMN_1694106 | 0.135857 | 7.791195 | 3.65844  | 0.00061  | 0.022901 | -0.53351 |

|              |          |          |          |          |          |          |
|--------------|----------|----------|----------|----------|----------|----------|
| ILMN_1796013 | 0.135659 | 7.230507 | 5.029747 | 6.69E-06 | 0.001469 | 3.69681  |
| ILMN_1736327 | 0.135512 | 7.254208 | 3.43222  | 0.001209 | 0.033515 | -1.16521 |
| ILMN_1716869 | -0.13548 | 6.670323 | -4.56076 | 3.32E-05 | 0.00377  | 2.187161 |
| ILMN_1770641 | -0.13528 | 6.005746 | -4.93417 | 9.30E-06 | 0.001782 | 3.385125 |
| ILMN_3246206 | 0.135101 | 7.060914 | 3.334752 | 0.001613 | 0.0406   | -1.42989 |
| ILMN_2082324 | 0.135069 | 7.349485 | 6.780015 | 1.32E-08 | 2.84E-05 | 9.604368 |
| ILMN_2045994 | -0.13465 | 8.174052 | -5.28473 | 2.75E-06 | 0.000847 | 4.536723 |
| ILMN_1766658 | 0.134502 | 8.098891 | 4.480062 | 4.34E-05 | 0.004446 | 1.932937 |
| ILMN_2225718 | 0.13449  | 7.499277 | 3.923445 | 0.000267 | 0.014374 | 0.234865 |
| ILMN_2061565 | -0.1344  | 8.34587  | -4.45298 | 4.75E-05 | 0.004752 | 1.848028 |
| ILMN_2140700 | -0.13424 | 6.757813 | -5.32258 | 2.41E-06 | 0.000807 | 4.662343 |
| ILMN_1726104 | 0.134232 | 8.323975 | 4.414014 | 5.41E-05 | 0.00517  | 1.726236 |
| ILMN_1718972 | 0.134151 | 8.220588 | 4.912736 | 1.00E-05 | 0.001858 | 3.315499 |
| ILMN_1698189 | 0.13412  | 8.283864 | 5.123158 | 4.84E-06 | 0.001192 | 4.003157 |
| ILMN_2344850 | -0.13386 | 10.71219 | -6.34387 | 6.34E-08 | 6.35E-05 | 8.112808 |
| ILMN_1660341 | -0.13386 | 8.027969 | -4.69    | 2.14E-05 | 0.00287  | 2.59794  |
| ILMN_1666376 | -0.13345 | 7.528633 | -6.24549 | 9.03E-08 | 8.20E-05 | 7.77701  |
| ILMN_1795336 | 0.13325  | 5.682205 | 3.744821 | 0.000467 | 0.019597 | -0.28625 |
| ILMN_1714170 | -0.13286 | 7.992532 | -3.76435 | 0.000439 | 0.018915 | -0.22992 |
| ILMN_1724493 | 0.132792 | 8.164774 | 3.661776 | 0.000604 | 0.022767 | -0.52402 |
| ILMN_2135984 | 0.132714 | 6.588567 | 3.865031 | 0.000321 | 0.015997 | 0.063041 |
| ILMN_1717326 | -0.13227 | 6.720387 | -3.93917 | 0.000254 | 0.013842 | 0.28135  |
| ILMN_1666599 | 0.132237 | 7.265358 | 4.581722 | 3.09E-05 | 0.003623 | 2.253495 |
| ILMN_1832208 | 0.132046 | 9.540907 | 4.738401 | 1.82E-05 | 0.002634 | 2.752887 |
| ILMN_1806809 | -0.13201 | 6.996511 | -5.14908 | 4.42E-06 | 0.001146 | 4.088467 |
| ILMN_3274596 | -0.13199 | 10.58903 | -4.51368 | 3.88E-05 | 0.004079 | 2.03864  |
| ILMN_2326509 | 0.131876 | 8.811935 | 4.058724 | 0.000173 | 0.010808 | 0.637788 |
| ILMN_1717990 | 0.131724 | 7.262928 | 3.503694 | 0.000976 | 0.029813 | -0.96819 |
| ILMN_1671791 | 0.131708 | 7.469116 | 3.957201 | 0.000239 | 0.013337 | 0.334761 |
| ILMN_3298716 | 0.131705 | 6.642078 | 3.854134 | 0.000332 | 0.016239 | 0.031134 |
| ILMN_1712400 | 0.131687 | 8.876375 | 3.973425 | 0.000227 | 0.013051 | 0.382931 |
| ILMN_1756595 | -0.13147 | 7.482138 | -3.24862 | 0.002074 | 0.047831 | -1.65981 |
| ILMN_1710622 | -0.13124 | 7.914403 | -3.60441 | 0.000719 | 0.024955 | -0.6865  |
| ILMN_1655876 | -0.13119 | 7.946876 | -3.87916 | 0.000307 | 0.01557  | 0.104485 |
| ILMN_1773567 | -0.13111 | 11.08087 | -3.30075 | 0.001782 | 0.043302 | -1.5211  |
| ILMN_3263702 | 0.131029 | 6.359064 | 4.364794 | 6.37E-05 | 0.005842 | 1.573039 |
| ILMN_1709483 | 0.130638 | 7.580603 | 5.078289 | 5.65E-06 | 0.001335 | 3.8558   |
| ILMN_1669323 | 0.130574 | 7.255136 | 3.90671  | 0.000281 | 0.014795 | 0.185501 |
| ILMN_1680579 | -0.13049 | 8.39294  | -4.43574 | 5.04E-05 | 0.004896 | 1.794088 |
| ILMN_1788166 | 0.130487 | 8.675036 | 4.409128 | 5.50E-05 | 0.005225 | 1.710996 |
| ILMN_1797332 | 0.130393 | 8.23721  | 3.752921 | 0.000455 | 0.019311 | -0.2629  |
| ILMN_2414399 | 0.130313 | 7.24565  | 5.019535 | 6.93E-06 | 0.001483 | 3.663423 |
| ILMN_1745034 | 0.130045 | 8.710431 | 4.412001 | 5.45E-05 | 0.00519  | 1.719958 |
| ILMN_2150402 | 0.129949 | 6.642874 | 4.787714 | 1.54E-05 | 0.002396 | 2.911323 |
| ILMN_1655557 | -0.12926 | 8.6097   | -3.71113 | 0.000518 | 0.020853 | -0.38305 |
| ILMN_1669831 | 0.129228 | 7.643488 | 6.779613 | 1.32E-08 | 2.84E-05 | 9.602993 |
| ILMN_2404182 | -0.12898 | 7.265849 | -4.84378 | 1.27E-05 | 0.002206 | 3.09215  |
| ILMN_1678678 | -0.12889 | 8.497363 | -3.32119 | 0.001679 | 0.04148  | -1.46633 |
| ILMN_1815121 | 0.128888 | 6.009127 | 4.223343 | 0.000101 | 0.00739  | 1.136949 |
| ILMN_1759023 | -0.12882 | 6.831852 | -3.73925 | 0.000475 | 0.019688 | -0.3023  |
| ILMN_2285375 | 0.128498 | 8.553091 | 3.588041 | 0.000756 | 0.025664 | -0.73261 |
| ILMN_2151056 | -0.12847 | 7.826808 | -4.75403 | 1.72E-05 | 0.002529 | 2.803054 |
| ILMN_2148150 | 0.128045 | 6.811128 | 3.578095 | 0.00078  | 0.025917 | -0.76055 |
| ILMN_3246538 | -0.12801 | 6.830278 | -3.84652 | 0.00034  | 0.01641  | 0.008878 |



|              |          |          |          |          |          |          |
|--------------|----------|----------|----------|----------|----------|----------|
| ILMN_1665372 | -0.12798 | 6.998521 | -4.19295 | 0.000112 | 0.007949 | 1.044087 |
| ILMN_1748476 | 0.127974 | 10.8424  | 5.14922  | 4.42E-06 | 0.001146 | 4.088917 |
| ILMN_1657697 | -0.12791 | 9.858753 | -4.83498 | 1.31E-05 | 0.002206 | 3.063705 |
| ILMN_1717674 | -0.12761 | 9.362655 | -3.96807 | 0.000231 | 0.013138 | 0.367015 |
| ILMN_1796589 | 0.127568 | 9.182448 | 4.265463 | 8.84E-05 | 0.007039 | 1.266136 |
| ILMN_1735052 | -0.12751 | 8.102006 | -3.6614  | 0.000604 | 0.022769 | -0.5251  |
| ILMN_1759818 | -0.12736 | 7.741005 | -3.54826 | 0.000853 | 0.027472 | -0.84413 |
| ILMN_1667893 | -0.12724 | 8.518279 | -3.32169 | 0.001676 | 0.04148  | -1.46499 |
| ILMN_1657373 | -0.12706 | 9.93256  | -3.31317 | 0.001719 | 0.042205 | -1.48787 |
| ILMN_2398107 | 0.126453 | 7.265734 | 5.561625 | 1.04E-06 | 0.000471 | 5.460498 |
| ILMN_1777564 | 0.126416 | 10.34518 | 4.686447 | 2.17E-05 | 0.00287  | 2.586605 |
| ILMN_1670353 | 0.126202 | 9.008403 | 3.895258 | 0.000291 | 0.015163 | 0.151785 |
| ILMN_1799128 | 0.126116 | 9.232999 | 5.018451 | 6.96E-06 | 0.001483 | 3.659881 |
| ILMN_1758915 | 0.12603  | 8.708471 | 4.801578 | 1.47E-05 | 0.00235  | 2.955968 |
| ILMN_1713764 | -0.12573 | 6.910495 | -4.31311 | 7.56E-05 | 0.006438 | 1.412951 |
| ILMN_2305112 | 0.125701 | 6.280871 | 6.979482 | 6.42E-09 | 1.81E-05 | 10.28676 |
| ILMN_1815723 | 0.125541 | 8.40545  | 4.804234 | 1.45E-05 | 0.00235  | 2.964527 |
| ILMN_1704793 | -0.12528 | 8.555961 | -4.2939  | 8.05E-05 | 0.006641 | 1.353671 |
| ILMN_1703324 | 0.125235 | 7.840373 | 3.850882 | 0.000335 | 0.016288 | 0.021622 |
| ILMN_1784871 | 0.125199 | 10.97356 | 3.416083 | 0.001269 | 0.034716 | -1.20936 |
| ILMN_2085525 | 0.125178 | 7.593519 | 4.701681 | 2.06E-05 | 0.002852 | 2.635294 |
| ILMN_1776337 | 0.125156 | 8.179413 | 3.534365 | 0.00089  | 0.028141 | -0.88291 |
| ILMN_1811472 | 0.124959 | 8.848215 | 3.522106 | 0.000924 | 0.028843 | -0.91705 |
| ILMN_1700507 | -0.12492 | 9.003335 | -3.22733 | 0.002206 | 0.049867 | -1.71604 |
| ILMN_1789510 | 0.124793 | 9.487129 | 3.317421 | 0.001697 | 0.041801 | -1.47646 |
| ILMN_2367753 | -0.12462 | 8.28046  | -3.61961 | 0.000687 | 0.024514 | -0.64359 |
| ILMN_1749930 | 0.124601 | 7.864206 | 5.18529  | 3.90E-06 | 0.001066 | 4.20781  |
| ILMN_1669981 | -0.12436 | 6.921259 | -4.79146 | 1.52E-05 | 0.002378 | 2.923371 |
| ILMN_1725366 | 0.124297 | 6.520463 | 3.67845  | 0.000573 | 0.022063 | -0.47652 |
| ILMN_1801939 | 0.12393  | 9.923411 | 3.578857 | 0.000778 | 0.025882 | -0.75841 |
| ILMN_1772702 | 0.123745 | 9.274788 | 4.542376 | 3.53E-05 | 0.003884 | 2.129089 |
| ILMN_3300198 | -0.12362 | 7.088251 | -3.5916  | 0.000748 | 0.025573 | -0.72259 |
| ILMN_1735762 | -0.12357 | 6.867633 | -4.23122 | 9.89E-05 | 0.007317 | 1.161052 |
| ILMN_1698209 | 0.12352  | 8.592883 | 4.820632 | 1.37E-05 | 0.002288 | 3.017399 |
| ILMN_1659888 | 0.123509 | 10.85665 | 3.615337 | 0.000696 | 0.024558 | -0.65567 |
| ILMN_1808777 | -0.12342 | 8.520059 | -3.87314 | 0.000313 | 0.015707 | 0.086811 |
| ILMN_1759595 | -0.12311 | 7.280271 | -8.15814 | 9.39E-11 | 1.08E-06 | 14.28667 |
| ILMN_1897310 | -0.12299 | 8.603914 | -5.06404 | 5.94E-06 | 0.001384 | 3.809071 |
| ILMN_2246510 | -0.12298 | 7.998613 | -3.63245 | 0.00066  | 0.02392  | -0.60726 |
| ILMN_2408645 | 0.122937 | 8.748486 | 5.837429 | 3.90E-07 | 0.000244 | 6.389998 |
| ILMN_1810228 | 0.122751 | 8.282954 | 4.765739 | 1.66E-05 | 0.002483 | 2.84065  |
| ILMN_2377185 | -0.12267 | 8.479248 | -3.48743 | 0.001025 | 0.030581 | -1.01324 |
| ILMN_1709085 | 0.122619 | 6.344561 | 4.248314 | 9.35E-05 | 0.007224 | 1.213468 |
| ILMN_1791002 | 0.122602 | 7.781896 | 3.424377 | 0.001238 | 0.03413  | -1.18668 |
| ILMN_3245983 | -0.12257 | 7.955008 | -3.33142 | 0.001629 | 0.040776 | -1.43886 |
| ILMN_1748438 | 0.122513 | 10.48076 | 4.605514 | 2.85E-05 | 0.003425 | 2.328924 |
| ILMN_2411139 | 0.122289 | 6.792351 | 4.104767 | 0.000149 | 0.009825 | 0.776452 |
| ILMN_1787815 | 0.122248 | 7.582959 | 3.751744 | 0.000457 | 0.019334 | -0.2663  |
| ILMN_2324056 | 0.122215 | 9.370995 | 3.715225 | 0.000512 | 0.020688 | -0.37133 |
| ILMN_1651347 | -0.12219 | 9.178162 | -5.40189 | 1.82E-06 | 0.000707 | 4.926274 |
| ILMN_2143795 | 0.122172 | 10.18029 | 3.955019 | 0.000241 | 0.0134   | 0.328291 |
| ILMN_1759252 | -0.12198 | 10.14331 | -4.9109  | 1.01E-05 | 0.001858 | 3.309549 |
| ILMN_1768662 | 0.12194  | 7.893578 | 4.270014 | 8.71E-05 | 0.006983 | 1.28013  |
| ILMN_1672022 | -0.12182 | 6.385237 | -3.41009 | 0.001292 | 0.035145 | -1.22573 |

|              |          |          |          |          |          |          |
|--------------|----------|----------|----------|----------|----------|----------|
| ILMN_3240370 | 0.121802 | 7.789924 | 3.650199 | 0.000625 | 0.023311 | -0.55693 |
| ILMN_2111187 | 0.121653 | 8.370281 | 3.875261 | 0.00031  | 0.01567  | 0.093035 |
| ILMN_1794132 | 0.121519 | 11.12478 | 3.962679 | 0.000235 | 0.01326  | 0.351014 |
| ILMN_1710752 | 0.121472 | 8.511522 | 4.511958 | 3.90E-05 | 0.004079 | 2.033204 |
| ILMN_1712803 | 0.12145  | 9.548288 | 5.181403 | 3.95E-06 | 0.001072 | 4.194985 |
| ILMN_2090782 | 0.121389 | 8.613408 | 3.337136 | 0.001602 | 0.040464 | -1.42347 |
| ILMN_2195821 | -0.12131 | 7.004528 | -3.4791  | 0.001051 | 0.031057 | -1.03626 |
| ILMN_3251737 | -0.12125 | 8.954101 | -3.48891 | 0.001021 | 0.030581 | -1.00914 |
| ILMN_1798288 | -0.12077 | 7.041444 | -5.04271 | 6.40E-06 | 0.001469 | 3.739217 |
| ILMN_1801934 | -0.12061 | 7.979874 | -3.25541 | 0.002034 | 0.047268 | -1.64183 |
| ILMN_1695475 | -0.12053 | 8.116216 | -3.59914 | 0.000731 | 0.025207 | -0.70136 |
| ILMN_1689059 | -0.12047 | 7.465566 | -3.7792  | 0.00042  | 0.018405 | -0.18697 |
| ILMN_1770665 | -0.12034 | 6.553793 | -5.04003 | 6.45E-06 | 0.001469 | 3.73044  |
| ILMN_2080611 | 0.120276 | 8.138755 | 3.803647 | 0.000389 | 0.017716 | -0.11606 |
| ILMN_1764729 | -0.12027 | 8.524975 | -4.24911 | 9.33E-05 | 0.007224 | 1.215926 |
| ILMN_1740185 | -0.12025 | 8.250801 | -3.5081  | 0.000963 | 0.029551 | -0.95596 |
| ILMN_1770692 | 0.120115 | 9.212045 | 4.262789 | 8.92E-05 | 0.007073 | 1.25792  |
| ILMN_1751776 | 0.119999 | 9.023057 | 4.538712 | 3.57E-05 | 0.003907 | 2.117527 |
| ILMN_1791568 | 0.119972 | 7.620488 | 4.241564 | 9.56E-05 | 0.007252 | 1.192764 |
| ILMN_2243308 | -0.11992 | 8.15554  | -4.76939 | 1.64E-05 | 0.002474 | 2.852374 |
| ILMN_1779353 | 0.119768 | 8.683327 | 3.434112 | 0.001202 | 0.033496 | -1.16003 |
| ILMN_2356955 | 0.119737 | 6.470147 | 5.015326 | 7.03E-06 | 0.001487 | 3.649667 |
| ILMN_2319910 | -0.11973 | 7.843609 | -4.65401 | 2.42E-05 | 0.003035 | 2.483141 |
| ILMN_1717809 | -0.11972 | 6.697764 | -4.33978 | 6.92E-05 | 0.006167 | 1.495464 |
| ILMN_1684108 | -0.11969 | 9.051949 | -3.24986 | 0.002067 | 0.047755 | -1.65652 |
| ILMN_2235137 | 0.119676 | 8.759065 | 3.483268 | 0.001038 | 0.030827 | -1.02475 |
| ILMN_1790577 | 0.119657 | 8.636033 | 3.252131 | 0.002053 | 0.047505 | -1.65051 |
| ILMN_1805271 | -0.11965 | 8.035721 | -4.86795 | 1.17E-05 | 0.002108 | 3.170315 |
| ILMN_1677098 | -0.11938 | 6.765281 | -4.26875 | 8.75E-05 | 0.006995 | 1.276255 |
| ILMN_1838313 | 0.119202 | 7.675533 | 3.631866 | 0.000662 | 0.02392  | -0.60892 |
| ILMN_1696601 | 0.119145 | 8.966241 | 5.306681 | 2.55E-06 | 0.00082  | 4.609549 |
| ILMN_1732772 | 0.11908  | 8.220642 | 4.999578 | 7.42E-06 | 0.001515 | 3.598232 |
| ILMN_1744138 | -0.119   | 9.242957 | -5.46305 | 1.47E-06 | 0.000611 | 5.13042  |
| ILMN_1682197 | 0.118915 | 7.729661 | 4.837027 | 1.30E-05 | 0.002206 | 3.070325 |
| ILMN_1814282 | 0.118868 | 8.293627 | 3.68659  | 0.000559 | 0.021735 | -0.45328 |
| ILMN_1654385 | 0.118742 | 6.037032 | 4.482789 | 4.30E-05 | 0.00443  | 1.941499 |
| ILMN_1692665 | -0.11857 | 6.993973 | -4.33262 | 7.09E-05 | 0.006248 | 1.473303 |
| ILMN_1665526 | -0.1184  | 6.424292 | -3.64518 | 0.000635 | 0.02352  | -0.57116 |
| ILMN_1754149 | -0.11832 | 8.468935 | -3.81494 | 0.000375 | 0.017296 | -0.08322 |
| ILMN_1673721 | 0.118146 | 7.484523 | 3.885196 | 0.000301 | 0.015385 | 0.122203 |
| ILMN_1728714 | 0.118075 | 6.99978  | 3.322234 | 0.001674 | 0.04148  | -1.46354 |
| ILMN_2077094 | 0.11805  | 8.705853 | 3.461759 | 0.001107 | 0.031917 | -1.08408 |
| ILMN_1768004 | -0.11801 | 8.515974 | -5.792   | 4.58E-07 | 0.000282 | 6.236372 |
| ILMN_2285996 | 0.117685 | 10.78016 | 4.49281  | 4.16E-05 | 0.004324 | 1.972977 |
| ILMN_1712413 | 0.117647 | 8.579679 | 3.974109 | 0.000227 | 0.013051 | 0.384962 |
| ILMN_1667361 | -0.11759 | 6.543923 | -5.25559 | 3.05E-06 | 0.000922 | 4.440172 |
| ILMN_1695271 | 0.117399 | 8.107913 | 4.96635  | 8.33E-06 | 0.001622 | 3.489867 |
| ILMN_1656463 | 0.117398 | 8.129104 | 4.800408 | 1.47E-05 | 0.00235  | 2.9522   |
| ILMN_2112460 | 0.117384 | 7.469196 | 5.680739 | 6.80E-07 | 0.000373 | 5.860937 |
| ILMN_1805737 | 0.117376 | 9.318393 | 3.234463 | 0.002161 | 0.049076 | -1.69723 |
| ILMN_2351638 | -0.11712 | 6.269081 | -3.62042 | 0.000685 | 0.024488 | -0.64129 |
| ILMN_1714352 | -0.11702 | 7.136768 | -3.47916 | 0.001051 | 0.031057 | -1.03611 |
| ILMN_1761946 | -0.117   | 10.03847 | -3.3667  | 0.001469 | 0.03824  | -1.34364 |
| ILMN_1733094 | 0.11696  | 7.83028  | 3.425213 | 0.001235 | 0.034084 | -1.1844  |

|              |          |          |          |          |          |          |
|--------------|----------|----------|----------|----------|----------|----------|
| ILMN_2317730 | -0.1169  | 7.618262 | -6.43217 | 4.62E-08 | 5.49E-05 | 8.414484 |
| ILMN_2061732 | 0.116856 | 9.634742 | 3.443856 | 0.001168 | 0.033144 | -1.1333  |
| ILMN_1773369 | 0.11685  | 8.324905 | 4.153616 | 0.000127 | 0.008816 | 0.924383 |
| ILMN_3239771 | 0.116848 | 9.107844 | 3.573817 | 0.00079  | 0.026205 | -0.77256 |
| ILMN_1712985 | 0.116482 | 8.016082 | 5.525005 | 1.18E-06 | 0.000513 | 5.337727 |
| ILMN_2108357 | 0.116327 | 9.510669 | 3.710022 | 0.00052  | 0.020881 | -0.38624 |
| ILMN_2055156 | -0.11628 | 7.259109 | -3.70521 | 0.000528 | 0.020994 | -0.40002 |
| ILMN_1741133 | 0.116236 | 12.2059  | 3.393987 | 0.001355 | 0.03607  | -1.2696  |
| ILMN_1787879 | 0.116224 | 8.903315 | 4.14458  | 0.000131 | 0.008953 | 0.896956 |
| ILMN_1702322 | -0.11621 | 6.437328 | -3.40441 | 0.001314 | 0.035472 | -1.2412  |
| ILMN_1813775 | -0.11607 | 8.530452 | -4.7635  | 1.67E-05 | 0.002491 | 2.833464 |
| ILMN_1652008 | 0.115689 | 7.747766 | 5.658295 | 7.37E-07 | 0.000374 | 5.785363 |
| ILMN_1756550 | 0.115667 | 7.648422 | 4.799325 | 1.48E-05 | 0.00235  | 2.948709 |
| ILMN_1655126 | -0.11564 | 7.973174 | -3.70007 | 0.000536 | 0.021256 | -0.41474 |
| ILMN_1715616 | 0.115548 | 9.021957 | 5.026576 | 6.76E-06 | 0.001476 | 3.686442 |
| ILMN_1700515 | 0.115507 | 7.735061 | 4.270028 | 8.71E-05 | 0.006983 | 1.280173 |
| ILMN_1697317 | -0.11544 | 5.879137 | -3.57052 | 0.000798 | 0.026314 | -0.78182 |
| ILMN_2311537 | 0.115407 | 11.27813 | 3.584224 | 0.000765 | 0.025761 | -0.74334 |
| ILMN_1704702 | 0.115406 | 7.341246 | 3.706683 | 0.000526 | 0.020981 | -0.39581 |
| ILMN_1786379 | 0.115383 | 6.061254 | 3.973287 | 0.000228 | 0.013051 | 0.382521 |
| ILMN_2253648 | 0.115334 | 7.430884 | 4.145973 | 0.000131 | 0.00893  | 0.901182 |
| ILMN_1720819 | 0.115311 | 10.45168 | 4.688557 | 2.15E-05 | 0.00287  | 2.593345 |
| ILMN_1689774 | -0.11494 | 9.864237 | -3.99189 | 0.000214 | 0.012592 | 0.437883 |
| ILMN_1755862 | 0.114935 | 8.186322 | 3.947055 | 0.000247 | 0.013621 | 0.304689 |
| ILMN_1795704 | -0.11476 | 6.093777 | -5.1662  | 4.16E-06 | 0.001113 | 4.144853 |
| ILMN_1676846 | 0.114759 | 9.847006 | 4.556069 | 3.37E-05 | 0.00377  | 2.172337 |
| ILMN_2227968 | 0.114522 | 7.650799 | 5.058441 | 6.06E-06 | 0.001401 | 3.790738 |
| ILMN_2371053 | -0.11445 | 7.79892  | -4.32376 | 7.30E-05 | 0.006322 | 1.445878 |
| ILMN_1760802 | 0.114397 | 6.722676 | 4.302284 | 7.83E-05 | 0.00651  | 1.379541 |
| ILMN_2357781 | -0.11404 | 6.984022 | -3.75407 | 0.000454 | 0.019291 | -0.25958 |
| ILMN_1703041 | -0.11403 | 5.96196  | -4.55998 | 3.32E-05 | 0.00377  | 2.184688 |
| ILMN_1674421 | -0.11387 | 8.956569 | -4.7674  | 1.65E-05 | 0.00248  | 2.845999 |
| ILMN_1686906 | -0.11373 | 6.61997  | -3.37615 | 0.001428 | 0.037443 | -1.31805 |
| ILMN_1743763 | -0.11365 | 8.513739 | -3.88483 | 0.000301 | 0.015385 | 0.121121 |
| ILMN_1732750 | 0.11365  | 7.464403 | 4.282679 | 8.35E-05 | 0.006858 | 1.319107 |
| ILMN_1749829 | 0.113574 | 9.291547 | 3.474094 | 0.001067 | 0.031176 | -1.05008 |
| ILMN_1731070 | 0.113384 | 8.203436 | 4.091641 | 0.000156 | 0.010072 | 0.736843 |
| ILMN_3273047 | 0.113    | 6.289677 | 3.737058 | 0.000478 | 0.019733 | -0.3086  |
| ILMN_2398926 | 0.112973 | 8.502134 | 5.133474 | 4.67E-06 | 0.001174 | 4.037086 |
| ILMN_3282768 | 0.112921 | 8.48882  | 3.229775 | 0.00219  | 0.049614 | -1.7096  |
| ILMN_1737728 | 0.112817 | 8.578394 | 3.641547 | 0.000642 | 0.023682 | -0.58148 |
| ILMN_1780382 | 0.112814 | 9.142404 | 4.439297 | 4.98E-05 | 0.004864 | 1.805212 |
| ILMN_1683598 | 0.112783 | 8.471196 | 3.479071 | 0.001051 | 0.031057 | -1.03634 |
| ILMN_1722642 | -0.11275 | 7.247962 | -3.62991 | 0.000666 | 0.024002 | -0.61447 |
| ILMN_1676600 | -0.11253 | 9.628447 | -3.60772 | 0.000712 | 0.024854 | -0.67716 |
| ILMN_1663716 | -0.11247 | 6.101307 | -4.27622 | 8.53E-05 | 0.006955 | 1.299218 |
| ILMN_1662658 | 0.112444 | 9.094335 | 3.730064 | 0.000489 | 0.019993 | -0.32872 |
| ILMN_1684217 | 0.112443 | 8.660205 | 4.247815 | 9.37E-05 | 0.007224 | 1.211938 |
| ILMN_3246754 | 0.112063 | 6.658273 | 5.328206 | 2.36E-06 | 0.000807 | 4.681035 |
| ILMN_1730291 | -0.11175 | 8.709407 | -3.32636 | 0.001654 | 0.041191 | -1.45246 |
| ILMN_1796180 | -0.11173 | 7.129997 | -5.52294 | 1.19E-06 | 0.000513 | 5.330821 |
| ILMN_2338963 | 0.111666 | 7.851581 | 3.340519 | 0.001586 | 0.040212 | -1.41436 |
| ILMN_1781039 | -0.11153 | 8.572214 | -4.78186 | 1.57E-05 | 0.002407 | 2.892493 |
| ILMN_2382505 | -0.11151 | 6.686503 | -4.01562 | 0.000199 | 0.01202  | 0.508654 |

|              |          |          |          |          |          |          |
|--------------|----------|----------|----------|----------|----------|----------|
| ILMN_1810069 | 0.111505 | 7.707762 | 4.251394 | 9.26E-05 | 0.007221 | 1.222922 |
| ILMN_1795839 | -0.11144 | 7.585747 | -3.88372 | 0.000302 | 0.015416 | 0.117863 |
| ILMN_1725791 | 0.111393 | 7.771939 | 3.873377 | 0.000312 | 0.015707 | 0.087507 |
| ILMN_1794740 | -0.11131 | 8.186942 | -3.65901 | 0.000609 | 0.022886 | -0.53188 |
| ILMN_1719870 | 0.11131  | 8.18048  | 3.894629 | 0.000292 | 0.015163 | 0.149935 |
| ILMN_2070349 | 0.111135 | 6.622781 | 3.935295 | 0.000257 | 0.013983 | 0.269884 |
| ILMN_1689800 | 0.111079 | 8.066726 | 4.447194 | 4.85E-05 | 0.004789 | 1.829917 |
| ILMN_1757230 | -0.11106 | 6.625259 | -5.41655 | 1.73E-06 | 0.000687 | 4.97517  |
| ILMN_2316540 | 0.111024 | 10.15592 | 3.827472 | 0.000361 | 0.016989 | -0.04673 |
| ILMN_1709484 | 0.110996 | 6.939209 | 4.713942 | 1.98E-05 | 0.002792 | 2.674523 |
| ILMN_1727740 | 0.110981 | 9.924555 | 3.839066 | 0.000348 | 0.016593 | -0.0129  |
| ILMN_1740960 | 0.110966 | 7.273288 | 3.341093 | 0.001584 | 0.040178 | -1.41282 |
| ILMN_1671933 | 0.110868 | 10.0399  | 3.55597  | 0.000834 | 0.027039 | -0.82257 |
| ILMN_1721868 | 0.110856 | 9.594541 | 3.492663 | 0.001009 | 0.030438 | -0.99876 |
| ILMN_1745152 | -0.11059 | 8.553972 | -4.98072 | 7.92E-06 | 0.001561 | 3.5367   |
| ILMN_1757697 | 0.110488 | 7.179199 | 4.037381 | 0.000185 | 0.01143  | 0.573767 |
| ILMN_1668996 | 0.110448 | 10.9741  | 4.356257 | 6.56E-05 | 0.005933 | 1.546542 |
| ILMN_1781198 | -0.11034 | 7.040246 | -4.66136 | 2.36E-05 | 0.003004 | 2.506555 |
| ILMN_1776788 | -0.11028 | 6.904601 | -3.70026 | 0.000536 | 0.021256 | -0.41421 |
| ILMN_3249406 | 0.11024  | 7.633908 | 4.439635 | 4.97E-05 | 0.004864 | 1.806268 |
| ILMN_1769839 | -0.11022 | 5.604133 | -3.81964 | 0.00037  | 0.017174 | -0.06955 |
| ILMN_1661589 | -0.11014 | 9.039459 | -3.56256 | 0.000817 | 0.02668  | -0.80412 |
| ILMN_1769091 | 0.11013  | 10.25775 | 3.891653 | 0.000295 | 0.015237 | 0.141183 |
| ILMN_1670931 | 0.109982 | 8.344569 | 4.645969 | 2.49E-05 | 0.003085 | 2.457516 |
| ILMN_1757415 | 0.109799 | 7.754264 | 4.346003 | 6.78E-05 | 0.006104 | 1.514745 |
| ILMN_2390609 | -0.10968 | 7.612099 | -3.72343 | 0.000499 | 0.020264 | -0.34777 |
| ILMN_1882000 | 0.109602 | 7.486805 | 4.826209 | 1.35E-05 | 0.002255 | 3.035396 |
| ILMN_1805481 | 0.109383 | 8.210688 | 3.248913 | 0.002072 | 0.047831 | -1.65903 |
| ILMN_1799667 | 0.109126 | 7.599248 | 4.779955 | 1.58E-05 | 0.002407 | 2.886358 |
| ILMN_1668498 | 0.109033 | 8.076128 | 4.450891 | 4.79E-05 | 0.004771 | 1.841489 |
| ILMN_1686097 | 0.108979 | 10.63697 | 3.782293 | 0.000416 | 0.018352 | -0.178   |
| ILMN_1745813 | -0.10872 | 9.210892 | -3.562   | 0.000819 | 0.0267   | -0.8057  |
| ILMN_1853876 | 0.108707 | 6.888697 | 4.46005  | 4.64E-05 | 0.004695 | 1.870175 |
| ILMN_2409298 | 0.108432 | 9.038152 | 3.586094 | 0.000761 | 0.025703 | -0.73808 |
| ILMN_1789123 | 0.108427 | 9.000204 | 4.189343 | 0.000113 | 0.008026 | 1.033093 |
| ILMN_1798690 | -0.10832 | 6.199461 | -3.47808 | 0.001054 | 0.031069 | -1.03909 |
| ILMN_1688295 | -0.1083  | 7.923774 | -4.98471 | 7.82E-06 | 0.001549 | 3.549704 |
| ILMN_1739083 | -0.10825 | 7.948388 | -4.11232 | 0.000146 | 0.009652 | 0.799266 |
| ILMN_1788211 | -0.10823 | 7.375675 | -3.31061 | 0.001732 | 0.0424   | -1.4947  |
| ILMN_1798459 | 0.108047 | 6.719283 | 3.443016 | 0.001171 | 0.033169 | -1.13561 |
| ILMN_1656057 | -0.10798 | 10.21881 | -3.47636 | 0.00106  | 0.031124 | -1.04384 |
| ILMN_1753502 | -0.10797 | 5.861393 | -5.35768 | 2.13E-06 | 0.000765 | 4.779045 |
| ILMN_2263144 | 0.107941 | 7.580538 | 3.761822 | 0.000443 | 0.018993 | -0.23721 |
| ILMN_2048700 | 0.107848 | 9.063857 | 3.859505 | 0.000326 | 0.016137 | 0.046854 |
| ILMN_1743620 | 0.107591 | 6.116472 | 4.715564 | 1.96E-05 | 0.002788 | 2.679715 |
| ILMN_1809495 | 0.10753  | 12.22347 | 4.222304 | 0.000102 | 0.00739  | 1.133772 |
| ILMN_2072391 | 0.107484 | 8.267508 | 3.789415 | 0.000406 | 0.018103 | -0.15737 |
| ILMN_2326512 | 0.107427 | 8.422317 | 3.66896  | 0.00059  | 0.022452 | -0.50357 |
| ILMN_1770454 | -0.10737 | 9.212353 | -3.94522 | 0.000249 | 0.013644 | 0.299254 |
| ILMN_2048507 | 0.107324 | 6.934677 | 3.791896 | 0.000403 | 0.018034 | -0.15017 |
| ILMN_1734316 | 0.107294 | 7.968123 | 4.556741 | 3.36E-05 | 0.00377  | 2.174463 |
| ILMN_2219712 | 0.107292 | 10.62312 | 4.379147 | 6.08E-05 | 0.005632 | 1.617636 |
| ILMN_2155172 | 0.107287 | 9.350678 | 3.585605 | 0.000762 | 0.025703 | -0.73945 |
| ILMN_1677843 | -0.10718 | 8.415776 | -4.07777 | 0.000163 | 0.010372 | 0.695048 |

|              |          |          |          |          |          |          |
|--------------|----------|----------|----------|----------|----------|----------|
| ILMN_2214713 | 0.107108 | 6.93969  | 5.307674 | 2.54E-06 | 0.00082  | 4.612846 |
| ILMN_1683096 | 0.106993 | 7.129923 | 4.890468 | 1.08E-05 | 0.001983 | 3.243258 |
| ILMN_1729987 | -0.10698 | 8.692391 | -5.24174 | 3.20E-06 | 0.000935 | 4.394326 |
| ILMN_2401436 | 0.106948 | 6.733042 | 4.685924 | 2.17E-05 | 0.00287  | 2.584932 |
| ILMN_1714710 | -0.10689 | 7.440477 | -4.58599 | 3.05E-05 | 0.003596 | 2.267028 |
| ILMN_1672094 | -0.10679 | 6.754803 | -3.3576  | 0.001508 | 0.038903 | -1.36826 |
| ILMN_1776674 | 0.106736 | 9.301239 | 3.512384 | 0.000951 | 0.029398 | -0.94407 |
| ILMN_1792986 | 0.106734 | 7.065098 | 4.642651 | 2.52E-05 | 0.003109 | 2.446952 |
| ILMN_2405521 | 0.106707 | 9.709857 | 4.181024 | 0.000116 | 0.00823  | 1.007743 |
| ILMN_1761131 | 0.106698 | 9.413357 | 4.454722 | 4.73E-05 | 0.004738 | 1.853485 |
| ILMN_1728262 | 0.106644 | 5.633907 | 3.463121 | 0.001103 | 0.031813 | -1.08033 |
| ILMN_1786125 | 0.106629 | 9.585444 | 3.532614 | 0.000895 | 0.028223 | -0.88778 |
| ILMN_1664912 | -0.1066  | 6.625302 | -3.43235 | 0.001209 | 0.033515 | -1.16485 |
| ILMN_1751708 | -0.10649 | 12.29033 | -3.59729 | 0.000735 | 0.025249 | -0.70657 |
| ILMN_2048478 | -0.10645 | 6.143759 | -4.04993 | 0.000178 | 0.011038 | 0.611381 |
| ILMN_2344971 | 0.10637  | 7.690906 | 4.399734 | 5.68E-05 | 0.005347 | 1.681715 |
| ILMN_1705301 | 0.106353 | 7.378087 | 3.759485 | 0.000446 | 0.019085 | -0.24396 |
| ILMN_2347592 | 0.106341 | 7.731768 | 3.390092 | 0.00137  | 0.036422 | -1.28019 |
| ILMN_3244521 | -0.10622 | 8.874954 | -3.37132 | 0.001449 | 0.037866 | -1.33114 |
| ILMN_1719543 | -0.10619 | 6.558594 | -3.81115 | 0.00038  | 0.017435 | -0.09425 |
| ILMN_1823231 | -0.10615 | 6.043474 | -3.33565 | 0.001609 | 0.0406   | -1.42748 |
| ILMN_1775939 | 0.10613  | 9.109342 | 3.597828 | 0.000734 | 0.025233 | -0.70506 |
| ILMN_3243248 | 0.106091 | 6.648627 | 4.570821 | 3.20E-05 | 0.003708 | 2.218985 |
| ILMN_2077550 | 0.106059 | 9.13064  | 3.785144 | 0.000412 | 0.018281 | -0.16975 |
| ILMN_1670542 | 0.105891 | 9.474264 | 3.469227 | 0.001083 | 0.031474 | -1.0635  |
| ILMN_1773470 | -0.10585 | 7.148702 | -3.97793 | 0.000224 | 0.013032 | 0.396337 |
| ILMN_1705907 | 0.105821 | 8.640687 | 4.665055 | 2.33E-05 | 0.002989 | 2.51833  |
| ILMN_1701374 | 0.105685 | 8.063289 | 4.666492 | 2.32E-05 | 0.002985 | 2.522914 |
| ILMN_1700257 | 0.105617 | 7.445881 | 4.305883 | 7.74E-05 | 0.006493 | 1.390647 |
| ILMN_2048633 | 0.105414 | 6.738295 | 3.549354 | 0.000851 | 0.027457 | -0.84107 |
| ILMN_2063114 | 0.10541  | 7.51076  | 3.475328 | 0.001063 | 0.031167 | -1.04668 |
| ILMN_1716279 | 0.105329 | 8.575244 | 3.434629 | 0.001201 | 0.033496 | -1.15861 |
| ILMN_1787415 | -0.10531 | 7.716049 | -4.01418 | 0.0002   | 0.012033 | 0.50436  |
| ILMN_1814122 | 0.105296 | 8.830415 | 4.381442 | 6.03E-05 | 0.005614 | 1.624773 |
| ILMN_2404407 | -0.10515 | 6.015306 | -4.01841 | 0.000197 | 0.011976 | 0.516995 |
| ILMN_1700633 | -0.10507 | 6.483025 | -3.8453  | 0.000341 | 0.016419 | 0.005302 |
| ILMN_2202948 | 0.105045 | 8.434508 | 3.940033 | 0.000253 | 0.01384  | 0.283902 |
| ILMN_1799604 | 0.105021 | 10.66305 | 5.214172 | 3.52E-06 | 0.000996 | 4.303172 |
| ILMN_3256325 | -0.10484 | 7.767774 | -4.24989 | 9.30E-05 | 0.007224 | 1.218313 |
| ILMN_1809488 | 0.104793 | 10.62056 | 4.685903 | 2.17E-05 | 0.00287  | 2.584865 |
| ILMN_1700546 | 0.104696 | 7.170142 | 3.633675 | 0.000658 | 0.02392  | -0.6038  |
| ILMN_1698996 | 0.104681 | 6.57796  | 4.059204 | 0.000173 | 0.010808 | 0.639228 |
| ILMN_1663454 | -0.10463 | 10.93109 | -4.79672 | 1.49E-05 | 0.00235  | 2.940333 |
| ILMN_1716524 | -0.10462 | 10.43269 | -4.91242 | 1.00E-05 | 0.001858 | 3.31446  |
| ILMN_1765258 | -0.10462 | 9.497473 | -4.14715 | 0.00013  | 0.00893  | 0.904765 |
| ILMN_1653134 | -0.10451 | 7.862712 | -3.75557 | 0.000452 | 0.01927  | -0.25525 |
| ILMN_1761069 | 0.104378 | 7.418122 | 3.922834 | 0.000267 | 0.014374 | 0.23306  |
| ILMN_1706817 | -0.10421 | 8.933568 | -4.15297 | 0.000128 | 0.008817 | 0.922409 |
| ILMN_1688103 | -0.10408 | 7.79265  | -3.86453 | 0.000321 | 0.015999 | 0.061572 |
| ILMN_1714473 | -0.10401 | 6.555985 | -4.70191 | 2.06E-05 | 0.002852 | 2.636015 |
| ILMN_2249920 | -0.10398 | 6.030495 | -3.69416 | 0.000546 | 0.021487 | -0.43166 |
| ILMN_1671895 | -0.10387 | 6.998514 | -3.83394 | 0.000354 | 0.016789 | -0.02788 |
| ILMN_1728083 | -0.10378 | 7.764653 | -3.96157 | 0.000236 | 0.01326  | 0.347732 |
| ILMN_1703477 | -0.10357 | 8.719924 | -4.53361 | 3.63E-05 | 0.003925 | 2.101437 |

|              |          |          |          |          |          |          |
|--------------|----------|----------|----------|----------|----------|----------|
| ILMN_1773760 | 0.103461 | 10.87738 | 3.501903 | 0.000982 | 0.029895 | -0.97316 |
| ILMN_1704253 | -0.10344 | 7.390644 | -4.1774  | 0.000118 | 0.008294 | 0.996697 |
| ILMN_1767260 | 0.103353 | 7.203757 | 4.302961 | 7.82E-05 | 0.00651  | 1.381631 |
| ILMN_1690802 | 0.103281 | 11.86294 | 4.060458 | 0.000172 | 0.010802 | 0.642994 |
| ILMN_2306189 | -0.10323 | 8.775216 | -4.30795 | 7.69E-05 | 0.00648  | 1.397042 |
| ILMN_1803312 | 0.10315  | 10.1723  | 4.228339 | 9.98E-05 | 0.007338 | 1.152244 |
| ILMN_1744308 | 0.103132 | 8.517396 | 5.650338 | 7.58E-07 | 0.000379 | 5.758581 |
| ILMN_1777853 | -0.10299 | 6.925167 | -3.61642 | 0.000694 | 0.024558 | -0.6526  |
| ILMN_1709634 | 0.102976 | 7.720106 | 3.860199 | 0.000326 | 0.016125 | 0.048887 |
| ILMN_1679177 | 0.102748 | 7.84153  | 3.612938 | 0.000701 | 0.024636 | -0.66244 |
| ILMN_1815184 | 0.102649 | 9.900279 | 3.369615 | 0.001456 | 0.038028 | -1.33576 |
| ILMN_1750518 | 0.102646 | 9.345884 | 3.671996 | 0.000585 | 0.022356 | -0.49492 |
| ILMN_1654493 | 0.102595 | 7.359278 | 4.133932 | 0.000136 | 0.009176 | 0.864672 |
| ILMN_1721022 | -0.10247 | 11.28542 | -4.32474 | 7.27E-05 | 0.006317 | 1.4489   |
| ILMN_1655117 | 0.102468 | 7.807416 | 3.655305 | 0.000616 | 0.023048 | -0.54242 |
| ILMN_1671257 | 0.102428 | 10.84111 | 4.684228 | 2.19E-05 | 0.002875 | 2.579517 |
| ILMN_3245893 | 0.102396 | 6.436412 | 6.38856  | 5.40E-08 | 6.01E-05 | 8.265446 |
| ILMN_3251423 | 0.102381 | 6.070937 | 5.404967 | 1.80E-06 | 0.000707 | 4.936527 |
| ILMN_1802251 | -0.10237 | 9.784165 | -4.30952 | 7.65E-05 | 0.006463 | 1.401883 |
| ILMN_1785413 | 0.102282 | 6.579484 | 4.312501 | 7.57E-05 | 0.006438 | 1.411085 |
| ILMN_2350574 | -0.10223 | 7.019527 | -3.73853 | 0.000476 | 0.019708 | -0.30435 |
| ILMN_1678095 | 0.10218  | 6.22752  | 3.816297 | 0.000374 | 0.017268 | -0.07928 |
| ILMN_1798256 | 0.102102 | 10.07763 | 3.267273 | 0.001965 | 0.04627  | -1.61034 |
| ILMN_1815885 | -0.10199 | 6.751586 | -4.43454 | 5.06E-05 | 0.004896 | 1.790343 |
| ILMN_1744239 | 0.1018   | 7.234171 | 4.28478  | 8.30E-05 | 0.006827 | 1.325577 |
| ILMN_1682095 | -0.10171 | 7.826887 | -4.72945 | 1.87E-05 | 0.002693 | 2.724178 |
| ILMN_1688526 | 0.101658 | 11.46092 | 4.71937  | 1.94E-05 | 0.002763 | 2.691902 |
| ILMN_1788416 | 0.101648 | 10.07322 | 3.796697 | 0.000397 | 0.017953 | -0.13624 |
| ILMN_1734483 | -0.10156 | 8.371628 | -4.9943  | 7.56E-06 | 0.001524 | 3.58099  |
| ILMN_1690371 | 0.101477 | 9.478241 | 3.997697 | 0.00021  | 0.012381 | 0.455175 |
| ILMN_1748923 | 0.101456 | 7.985495 | 3.484668 | 0.001034 | 0.03075  | -1.02087 |
| ILMN_1801118 | 0.101293 | 9.449759 | 3.240504 | 0.002123 | 0.048513 | -1.68127 |
| ILMN_1804988 | -0.10127 | 8.036671 | -3.58706 | 0.000759 | 0.025703 | -0.73536 |
| ILMN_2198515 | -0.10119 | 6.781701 | -3.29003 | 0.001839 | 0.044149 | -1.54974 |
| ILMN_2319913 | -0.10104 | 8.392875 | -3.34509 | 0.001565 | 0.03991  | -1.40205 |
| ILMN_1682226 | -0.10102 | 6.776447 | -4.448   | 4.83E-05 | 0.004789 | 1.832443 |
| ILMN_1691578 | 0.100982 | 8.624275 | 3.502073 | 0.000981 | 0.029895 | -0.97269 |
| ILMN_1661293 | -0.10098 | 6.006452 | -3.80834 | 0.000383 | 0.01754  | -0.10243 |
| ILMN_1777895 | -0.10096 | 7.506303 | -4.70793 | 2.02E-05 | 0.002835 | 2.655279 |
| ILMN_1798654 | 0.10085  | 10.43062 | 4.195555 | 0.000111 | 0.007898 | 1.052039 |
| ILMN_2205999 | 0.100568 | 6.563454 | 3.924201 | 0.000266 | 0.014374 | 0.237098 |
| ILMN_1797307 | 0.100501 | 7.472941 | 3.848809 | 0.000337 | 0.016315 | 0.015561 |
| ILMN_2278636 | -0.1005  | 8.453397 | -4.63963 | 2.54E-05 | 0.003118 | 2.437344 |
| ILMN_1723625 | 0.100414 | 8.226137 | 3.366764 | 0.001468 | 0.03824  | -1.34348 |
| ILMN_1752988 | -0.10039 | 8.508428 | -4.27211 | 8.65E-05 | 0.006983 | 1.286581 |
| ILMN_2051373 | 0.100314 | 9.100051 | 3.476034 | 0.001061 | 0.031127 | -1.04473 |
| ILMN_2312719 | 0.100212 | 9.234985 | 3.783765 | 0.000414 | 0.018307 | -0.17374 |
| ILMN_2124816 | -0.1002  | 6.47506  | -3.47044 | 0.001079 | 0.031439 | -1.06015 |
| ILMN_1798177 | -0.1002  | 9.656604 | -4.67241 | 2.27E-05 | 0.002948 | 2.541781 |
| ILMN_1743911 | 0.100016 | 10.10492 | 3.523956 | 0.000918 | 0.02876  | -0.9119  |
| ILMN_1712122 | 0.099963 | 5.943253 | 5.641958 | 7.81E-07 | 0.000385 | 5.730385 |
| ILMN_1754234 | 0.099932 | 8.750927 | 3.968838 | 0.000231 | 0.013128 | 0.369301 |
| ILMN_1721741 | -0.09988 | 8.567651 | -3.63581 | 0.000654 | 0.023869 | -0.59775 |
| ILMN_1758633 | -0.09975 | 8.386412 | -3.75403 | 0.000454 | 0.019291 | -0.25969 |

|              |          |          |          |          |          |          |
|--------------|----------|----------|----------|----------|----------|----------|
| ILMN_2364357 | 0.099685 | 9.160358 | 3.693608 | 0.000547 | 0.021487 | -0.43323 |
| ILMN_3241979 | 0.099636 | 8.52377  | 3.54764  | 0.000855 | 0.027497 | -0.84586 |
| ILMN_1730825 | 0.099588 | 7.212852 | 3.447849 | 0.001154 | 0.032859 | -1.12234 |
| ILMN_2226304 | -0.09956 | 7.526339 | -3.38114 | 0.001407 | 0.037092 | -1.30452 |
| ILMN_1656670 | 0.099524 | 6.613323 | 4.325975 | 7.24E-05 | 0.006307 | 1.452733 |
| ILMN_1659364 | 0.099514 | 9.227493 | 4.065616 | 0.000169 | 0.010687 | 0.658494 |
| ILMN_1676548 | 0.099426 | 10.23764 | 3.456283 | 0.001125 | 0.032201 | -1.09916 |
| ILMN_1665205 | -0.09931 | 6.758934 | -3.64579 | 0.000634 | 0.023517 | -0.56943 |
| ILMN_1797298 | -0.09923 | 6.449559 | -4.54127 | 3.54E-05 | 0.003886 | 2.12559  |
| ILMN_1737611 | -0.09913 | 6.66995  | -5.73728 | 5.57E-07 | 0.000325 | 6.051582 |
| ILMN_3196019 | 0.099109 | 7.911907 | 3.523552 | 0.00092  | 0.028769 | -0.91302 |
| ILMN_1674302 | 0.098995 | 8.246591 | 3.666252 | 0.000595 | 0.022553 | -0.51128 |
| ILMN_1672504 | -0.09887 | 9.839358 | -3.41672 | 0.001266 | 0.034677 | -1.2076  |
| ILMN_1765858 | 0.09884  | 11.0411  | 4.465214 | 4.56E-05 | 0.004629 | 1.886361 |
| ILMN_1705201 | -0.09881 | 6.145961 | -3.52643 | 0.000912 | 0.028625 | -0.90502 |
| ILMN_1805104 | -0.0987  | 5.880778 | -3.54501 | 0.000862 | 0.027588 | -0.8532  |
| ILMN_1733956 | 0.098658 | 9.365749 | 3.550935 | 0.000847 | 0.027378 | -0.83665 |
| ILMN_1741736 | 0.098593 | 8.045154 | 4.992303 | 7.61E-06 | 0.001526 | 3.574486 |
| ILMN_1780937 | 0.098485 | 7.910153 | 4.655286 | 2.41E-05 | 0.003035 | 2.487193 |
| ILMN_1753482 | 0.098299 | 6.52185  | 3.730084 | 0.000489 | 0.019993 | -0.32866 |
| ILMN_2376667 | -0.0983  | 7.41598  | -4.7843  | 1.55E-05 | 0.002404 | 2.900339 |
| ILMN_2041046 | 0.098247 | 10.23294 | 4.331498 | 7.11E-05 | 0.006248 | 1.46982  |
| ILMN_1712320 | -0.09825 | 8.823535 | -4.56954 | 3.22E-05 | 0.003711 | 2.21492  |
| ILMN_1657797 | 0.0982   | 8.498498 | 3.549637 | 0.00085  | 0.027457 | -0.84028 |
| ILMN_1655177 | -0.09818 | 8.835963 | -3.80126 | 0.000392 | 0.017767 | -0.123   |
| ILMN_2320906 | 0.098165 | 8.239528 | 3.781758 | 0.000416 | 0.018352 | -0.17955 |
| ILMN_2336781 | 0.098163 | 9.712383 | 3.624482 | 0.000677 | 0.024328 | -0.62982 |
| ILMN_1778059 | 0.098098 | 6.052982 | 4.522756 | 3.77E-05 | 0.004007 | 2.067213 |
| ILMN_1685005 | -0.09809 | 9.236945 | -5.08275 | 5.57E-06 | 0.001323 | 3.87045  |
| ILMN_1721713 | 0.098067 | 8.741853 | 3.771376 | 0.00043  | 0.018729 | -0.2096  |
| ILMN_1792078 | -0.0979  | 9.804828 | -4.4912  | 4.19E-05 | 0.004333 | 1.967914 |
| ILMN_2371700 | 0.097897 | 7.614581 | 4.014896 | 0.000199 | 0.012026 | 0.506503 |
| ILMN_2212909 | 0.097885 | 10.08082 | 3.307815 | 0.001746 | 0.042537 | -1.5022  |
| ILMN_3306997 | 0.09787  | 8.643979 | 4.267601 | 8.78E-05 | 0.007006 | 1.27271  |
| ILMN_2214355 | 0.09787  | 6.543851 | 3.778687 | 0.00042  | 0.018411 | -0.18845 |
| ILMN_1798705 | 0.0978   | 8.716211 | 3.975846 | 0.000226 | 0.013051 | 0.390127 |
| ILMN_1713406 | -0.09778 | 8.336282 | -5.21867 | 3.47E-06 | 0.000988 | 4.31802  |
| ILMN_2210713 | 0.097758 | 6.990189 | 5.141904 | 4.53E-06 | 0.001166 | 4.064831 |
| ILMN_1728934 | 0.097548 | 10.36563 | 3.743649 | 0.000469 | 0.019597 | -0.28963 |
| ILMN_1723481 | -0.0975  | 7.711944 | -4.07113 | 0.000166 | 0.010538 | 0.675082 |
| ILMN_2377862 | 0.097461 | 7.906293 | 3.721934 | 0.000501 | 0.020334 | -0.35207 |
| ILMN_1682336 | 0.097406 | 7.018467 | 3.631373 | 0.000663 | 0.02392  | -0.61032 |
| ILMN_3231638 | -0.09728 | 7.788437 | -3.24606 | 0.00209  | 0.048026 | -1.66658 |
| ILMN_1791569 | -0.09725 | 7.56294  | -3.49582 | 0.001    | 0.03026  | -0.99002 |
| ILMN_1675130 | 0.097201 | 7.106587 | 3.365542 | 0.001474 | 0.038313 | -1.34679 |
| ILMN_1708787 | -0.09716 | 6.52756  | -4.12218 | 0.000141 | 0.009403 | 0.829077 |
| ILMN_1701269 | 0.097152 | 10.9199  | 3.826684 | 0.000362 | 0.016989 | -0.04902 |
| ILMN_1741219 | -0.09714 | 7.24337  | -3.747   | 0.000464 | 0.019525 | -0.27996 |
| ILMN_1704571 | -0.09711 | 8.266542 | -3.6743  | 0.000581 | 0.022272 | -0.48834 |
| ILMN_2327994 | 0.096959 | 7.877695 | 3.396451 | 0.001345 | 0.035999 | -1.26289 |
| ILMN_1716445 | 0.096808 | 9.710095 | 3.753548 | 0.000454 | 0.019297 | -0.26109 |
| ILMN_1667977 | 0.096763 | 7.875987 | 5.017969 | 6.97E-06 | 0.001483 | 3.658303 |
| ILMN_1694514 | -0.09673 | 6.798094 | -3.70869 | 0.000522 | 0.020939 | -0.39007 |
| ILMN_2367215 | 0.096733 | 8.953831 | 3.39149  | 0.001365 | 0.036306 | -1.27639 |

|              |          |          |          |          |          |          |
|--------------|----------|----------|----------|----------|----------|----------|
| ILMN_1710064 | -0.09641 | 6.052733 | -3.46402 | 0.0011   | 0.031813 | -1.07786 |
| ILMN_1915076 | 0.096396 | 6.374949 | 3.247043 | 0.002084 | 0.047921 | -1.66398 |
| ILMN_2061768 | 0.096374 | 5.620463 | 4.723059 | 1.92E-05 | 0.00274  | 2.703717 |
| ILMN_1797522 | -0.09637 | 9.338909 | -3.83901 | 0.000348 | 0.016593 | -0.01308 |
| ILMN_3282436 | -0.09637 | 9.636965 | -3.45963 | 0.001114 | 0.03204  | -1.08993 |
| ILMN_1658685 | -0.09633 | 5.723769 | -3.63552 | 0.000654 | 0.023869 | -0.59858 |
| ILMN_2411116 | 0.096269 | 6.521317 | 4.331472 | 7.11E-05 | 0.006248 | 1.469741 |
| ILMN_1788462 | 0.096224 | 9.76744  | 3.850651 | 0.000335 | 0.016288 | 0.020946 |
| ILMN_1685774 | 0.096196 | 11.23213 | 3.463243 | 0.001102 | 0.031813 | -1.08    |
| ILMN_1743711 | 0.096185 | 8.799743 | 3.906867 | 0.000281 | 0.014795 | 0.185965 |
| ILMN_1685679 | -0.09617 | 7.037924 | -4.99556 | 7.53E-06 | 0.001524 | 3.585116 |
| ILMN_1764970 | -0.09612 | 9.031092 | -4.13856 | 0.000134 | 0.009075 | 0.878706 |
| ILMN_1746561 | -0.09596 | 9.355075 | -4.87971 | 1.12E-05 | 0.002046 | 3.20838  |
| ILMN_1797318 | 0.095937 | 7.588091 | 3.631908 | 0.000662 | 0.02392  | -0.6088  |
| ILMN_1671906 | 0.095869 | 8.231716 | 3.530466 | 0.000901 | 0.028381 | -0.89377 |
| ILMN_1786718 | 0.095789 | 10.08506 | 3.519825 | 0.00093  | 0.029016 | -0.92339 |
| ILMN_2045729 | 0.095752 | 9.020965 | 3.668218 | 0.000592 | 0.022468 | -0.50568 |
| ILMN_1701289 | 0.095593 | 8.383383 | 3.254162 | 0.002041 | 0.047308 | -1.64513 |
| ILMN_1743241 | -0.09556 | 7.429253 | -3.54617 | 0.000859 | 0.027517 | -0.84997 |
| ILMN_1780667 | 0.095546 | 8.102367 | 3.376152 | 0.001428 | 0.037443 | -1.31804 |
| ILMN_1708059 | 0.095456 | 6.612322 | 3.952913 | 0.000243 | 0.013412 | 0.32205  |
| ILMN_2129273 | 0.095342 | 6.794774 | 3.457072 | 0.001123 | 0.032179 | -1.09698 |
| ILMN_1741942 | -0.09529 | 9.043092 | -3.74056 | 0.000473 | 0.019679 | -0.29852 |
| ILMN_1772124 | -0.09525 | 7.905463 | -3.85405 | 0.000332 | 0.016239 | 0.030892 |
| ILMN_1815190 | 0.095252 | 7.766689 | 4.230031 | 9.93E-05 | 0.007326 | 1.157424 |
| ILMN_1691418 | -0.09525 | 6.015237 | -3.74168 | 0.000472 | 0.019645 | -0.29528 |
| ILMN_1787923 | -0.09516 | 7.990188 | -3.7929  | 0.000402 | 0.018024 | -0.14725 |
| ILMN_1657983 | -0.09512 | 8.205449 | -4.57586 | 3.15E-05 | 0.00367  | 2.234931 |
| ILMN_1698715 | 0.095059 | 6.978506 | 5.905654 | 3.05E-07 | 0.000206 | 6.621067 |
| ILMN_1802646 | -0.095   | 5.629979 | -3.55504 | 0.000836 | 0.02709  | -0.82518 |
| ILMN_1810418 | 0.094944 | 6.766562 | 4.27089  | 8.68E-05 | 0.006983 | 1.282823 |
| ILMN_3276822 | 0.094915 | 6.700761 | 3.916589 | 0.000272 | 0.014527 | 0.21463  |
| ILMN_2049766 | 0.094885 | 7.162144 | 3.496235 | 0.000998 | 0.03026  | -0.98886 |
| ILMN_1734830 | -0.09486 | 6.273341 | -3.67968 | 0.000571 | 0.022053 | -0.473   |
| ILMN_1797005 | -0.09473 | 9.38135  | -3.89314 | 0.000293 | 0.015188 | 0.145559 |
| ILMN_1718271 | -0.09465 | 8.508077 | -3.50847 | 0.000962 | 0.029544 | -0.95493 |
| ILMN_1695362 | -0.09464 | 7.64827  | -3.58078 | 0.000773 | 0.02583  | -0.75301 |
| ILMN_1740505 | -0.0946  | 6.756571 | -5.23829 | 3.24E-06 | 0.000938 | 4.382928 |
| ILMN_1737195 | 0.094552 | 9.058671 | 3.886178 | 0.0003   | 0.015385 | 0.12509  |
| ILMN_2403965 | 0.094488 | 7.315688 | 3.688651 | 0.000556 | 0.021646 | -0.4474  |
| ILMN_1786108 | 0.094484 | 6.541234 | 3.626279 | 0.000673 | 0.024223 | -0.62474 |
| ILMN_1701882 | 0.09448  | 7.89375  | 3.905601 | 0.000282 | 0.014802 | 0.182236 |
| ILMN_1747935 | -0.09446 | 8.156604 | -4.23297 | 9.83E-05 | 0.00731  | 1.166431 |
| ILMN_3187852 | -0.09442 | 9.630297 | -4.14941 | 0.000129 | 0.008902 | 0.911612 |
| ILMN_1743204 | -0.09436 | 6.696148 | -4.24123 | 9.57E-05 | 0.007252 | 1.191753 |
| ILMN_1717173 | 0.09423  | 9.055678 | 3.44296  | 0.001171 | 0.033169 | -1.13576 |
| ILMN_1751773 | 0.094187 | 7.174382 | 4.092573 | 0.000155 | 0.010072 | 0.739654 |
| ILMN_1710150 | 0.094138 | 7.049956 | 4.745963 | 1.77E-05 | 0.002589 | 2.777145 |
| ILMN_1775759 | 0.094075 | 7.746172 | 3.371686 | 0.001447 | 0.037853 | -1.33015 |
| ILMN_1695946 | -0.09399 | 8.595334 | -3.44139 | 0.001177 | 0.03317  | -1.14007 |
| ILMN_1781281 | 0.093987 | 6.702514 | 4.226582 | 0.0001   | 0.007349 | 1.146864 |
| ILMN_2399310 | 0.093945 | 7.050559 | 3.272325 | 0.001936 | 0.045721 | -1.59691 |
| ILMN_1699737 | 0.093791 | 8.90879  | 4.236222 | 9.73E-05 | 0.00731  | 1.176391 |
| ILMN_1734290 | -0.09364 | 6.382182 | -3.34755 | 0.001554 | 0.039681 | -1.39542 |



|              |          |          |          |          |          |          |
|--------------|----------|----------|----------|----------|----------|----------|
| ILMN_1705403 | -0.09364 | 5.593937 | -4.40523 | 5.57E-05 | 0.005264 | 1.698849 |
| ILMN_1771738 | 0.093527 | 7.554359 | 5.304366 | 2.57E-06 | 0.00082  | 4.601869 |
| ILMN_2413644 | 0.093413 | 5.945823 | 3.306161 | 0.001754 | 0.042713 | -1.50663 |
| ILMN_1765523 | -0.09331 | 7.115895 | -3.60158 | 0.000726 | 0.025096 | -0.69448 |
| ILMN_2392546 | 0.093287 | 10.91639 | 3.350509 | 0.00154  | 0.039483 | -1.38742 |
| ILMN_3307930 | 0.093205 | 12.3474  | 3.910949 | 0.000277 | 0.01471  | 0.197997 |
| ILMN_1790625 | 0.093125 | 9.523981 | 3.954719 | 0.000241 | 0.0134   | 0.327401 |
| ILMN_1678300 | 0.093042 | 9.174469 | 3.433834 | 0.001203 | 0.033496 | -1.16079 |
| ILMN_2097185 | -0.09302 | 7.903364 | -3.50973 | 0.000959 | 0.029485 | -0.95145 |
| ILMN_3305871 | 0.092912 | 6.858199 | 3.846031 | 0.00034  | 0.016412 | 0.00744  |
| ILMN_1745217 | -0.09284 | 8.509883 | -4.25599 | 9.12E-05 | 0.007161 | 1.237045 |
| ILMN_1759175 | 0.092759 | 6.883299 | 4.177675 | 0.000118 | 0.008294 | 0.997543 |
| ILMN_2100458 | 0.092743 | 6.719361 | 3.785811 | 0.000411 | 0.018281 | -0.16781 |
| ILMN_1670821 | 0.092722 | 6.174755 | 4.235259 | 9.76E-05 | 0.00731  | 1.173439 |
| ILMN_3206242 | 0.092663 | 7.382247 | 3.328579 | 0.001643 | 0.040977 | -1.4465  |
| ILMN_1663390 | 0.092612 | 10.3255  | 3.286513 | 0.001858 | 0.04448  | -1.55913 |
| ILMN_1746948 | -0.09256 | 7.200818 | -3.46426 | 0.001099 | 0.031813 | -1.0772  |
| ILMN_1755749 | 0.092555 | 10.96564 | 4.331074 | 7.12E-05 | 0.006248 | 1.468508 |
| ILMN_1722089 | 0.092493 | 7.619406 | 3.998623 | 0.00021  | 0.012375 | 0.457937 |
| ILMN_1746699 | 0.092477 | 7.767765 | 3.491013 | 0.001014 | 0.030512 | -1.00333 |
| ILMN_1675038 | -0.0924  | 8.060328 | -4.06004 | 0.000172 | 0.010802 | 0.641731 |
| ILMN_3185161 | 0.092346 | 6.903838 | 4.781019 | 1.57E-05 | 0.002407 | 2.889779 |
| ILMN_2347917 | 0.092292 | 8.30568  | 4.08584  | 0.000159 | 0.010162 | 0.719359 |
| ILMN_1739103 | 0.092155 | 6.763199 | 3.85382  | 0.000332 | 0.016239 | 0.030216 |
| ILMN_3305304 | 0.092123 | 9.246339 | 4.243859 | 9.49E-05 | 0.007245 | 1.199804 |
| ILMN_1703946 | 0.092018 | 8.504249 | 3.253801 | 0.002043 | 0.047308 | -1.64608 |
| ILMN_1745904 | -0.09197 | 10.72794 | -3.35112 | 0.001538 | 0.039441 | -1.38578 |
| ILMN_1651433 | 0.091867 | 8.086261 | 3.607912 | 0.000712 | 0.024854 | -0.67663 |
| ILMN_1669424 | 0.091807 | 11.80404 | 3.567757 | 0.000804 | 0.026488 | -0.78956 |
| ILMN_1898692 | 0.091592 | 6.279318 | 4.844599 | 1.27E-05 | 0.002206 | 3.094789 |
| ILMN_1723124 | -0.09154 | 6.993052 | -3.842   | 0.000345 | 0.016505 | -0.00433 |
| ILMN_2311089 | 0.091511 | 7.284059 | 3.636934 | 0.000651 | 0.023869 | -0.59456 |
| ILMN_1754178 | 0.091488 | 10.43995 | 3.816932 | 0.000373 | 0.017257 | -0.07743 |
| ILMN_1685258 | 0.09147  | 10.63855 | 4.098623 | 0.000152 | 0.009966 | 0.757903 |
| ILMN_2384536 | 0.091353 | 8.082153 | 3.705597 | 0.000527 | 0.020993 | -0.39892 |
| ILMN_1658695 | 0.091323 | 8.046687 | 3.428205 | 0.001224 | 0.033808 | -1.17621 |
| ILMN_1815012 | -0.09132 | 8.664127 | -3.77116 | 0.00043  | 0.018729 | -0.21023 |
| ILMN_2048636 | 0.091279 | 7.645362 | 3.790072 | 0.000406 | 0.01809  | -0.15546 |
| ILMN_2400874 | 0.091208 | 9.201289 | 3.748326 | 0.000462 | 0.019469 | -0.27615 |
| ILMN_1677906 | 0.09119  | 9.433026 | 4.524611 | 3.74E-05 | 0.003995 | 2.07306  |
| ILMN_1733937 | 0.090994 | 7.646218 | 3.362135 | 0.001488 | 0.038554 | -1.35601 |
| ILMN_1900270 | 0.090849 | 6.401475 | 3.245125 | 0.002095 | 0.048092 | -1.66905 |
| ILMN_1765558 | -0.09084 | 7.628369 | -3.45972 | 0.001114 | 0.03204  | -1.08969 |
| ILMN_1722674 | 0.090791 | 6.699466 | 3.96716  | 0.000232 | 0.013155 | 0.364318 |
| ILMN_2261784 | 0.09073  | 8.13697  | 3.844571 | 0.000342 | 0.016419 | 0.003176 |
| ILMN_1783546 | -0.09066 | 8.003033 | -3.27819 | 0.001903 | 0.045121 | -1.5813  |
| ILMN_2379469 | 0.090616 | 11.18543 | 4.40824  | 5.52E-05 | 0.005226 | 1.708228 |
| ILMN_1754179 | -0.09059 | 8.305198 | -4.73948 | 1.81E-05 | 0.002634 | 2.756361 |
| ILMN_1768969 | 0.090542 | 7.446226 | 3.649083 | 0.000628 | 0.023365 | -0.5601  |
| ILMN_2128750 | -0.09043 | 10.87379 | -4.65768 | 2.39E-05 | 0.003031 | 2.49482  |
| ILMN_3234756 | 0.090421 | 7.0363   | 3.744771 | 0.000467 | 0.019597 | -0.28639 |
| ILMN_3179620 | 0.090407 | 6.460925 | 4.56534  | 3.26E-05 | 0.003739 | 2.201648 |
| ILMN_1692790 | 0.090383 | 8.579602 | 3.690737 | 0.000552 | 0.021556 | -0.44144 |
| ILMN_1756542 | -0.09034 | 6.823393 | -3.81182 | 0.000379 | 0.017435 | -0.0923  |

|              |          |          |          |          |          |          |
|--------------|----------|----------|----------|----------|----------|----------|
| ILMN_2178226 | 0.090328 | 5.761471 | 3.980397 | 0.000222 | 0.012952 | 0.403659 |
| ILMN_1805827 | -0.0903  | 12.81968 | -3.82692 | 0.000361 | 0.016989 | -0.04833 |
| ILMN_3307266 | 0.090183 | 7.157899 | 4.624264 | 2.68E-05 | 0.003272 | 2.38847  |
| ILMN_1673991 | 0.090175 | 10.46295 | 3.59007  | 0.000752 | 0.025581 | -0.7269  |
| ILMN_2325394 | 0.090164 | 6.413411 | 4.202392 | 0.000109 | 0.007788 | 1.072909 |
| ILMN_1781419 | 0.090137 | 8.999329 | 3.552638 | 0.000842 | 0.027262 | -0.83189 |
| ILMN_3272768 | 0.09012  | 6.624888 | 5.296918 | 2.64E-06 | 0.000834 | 4.577153 |
| ILMN_2110829 | 0.090066 | 9.06234  | 4.546465 | 3.48E-05 | 0.003868 | 2.142001 |
| ILMN_2350114 | -0.09006 | 6.47765  | -3.76727 | 0.000435 | 0.018838 | -0.22149 |
| ILMN_1766637 | 0.089845 | 8.528574 | 3.965148 | 0.000233 | 0.013196 | 0.358345 |
| ILMN_1733757 | 0.089843 | 10.38152 | 3.234662 | 0.00216  | 0.049076 | -1.6967  |
| ILMN_2141259 | 0.089827 | 6.809435 | 5.095506 | 5.33E-06 | 0.001275 | 3.912299 |
| ILMN_1761531 | -0.08974 | 7.048732 | -4.95667 | 8.61E-06 | 0.001667 | 3.458328 |
| ILMN_2179837 | 0.089665 | 10.82075 | 3.737278 | 0.000478 | 0.019733 | -0.30797 |
| ILMN_1766185 | 0.089639 | 8.20693  | 3.771329 | 0.00043  | 0.018729 | -0.20974 |
| ILMN_1788149 | -0.08958 | 5.95601  | -3.54624 | 0.000859 | 0.027517 | -0.84978 |
| ILMN_1664167 | 0.089514 | 10.25886 | 4.340535 | 6.90E-05 | 0.006167 | 1.4978   |
| ILMN_2059797 | -0.08946 | 7.313495 | -3.68317 | 0.000565 | 0.021901 | -0.46306 |
| ILMN_1815882 | 0.089406 | 6.880175 | 3.952919 | 0.000243 | 0.013412 | 0.322067 |
| ILMN_1736130 | 0.089314 | 7.127001 | 3.620793 | 0.000684 | 0.024488 | -0.64025 |
| ILMN_1703005 | -0.0892  | 10.44196 | -3.24864 | 0.002074 | 0.047831 | -1.65977 |
| ILMN_1690352 | -0.08915 | 8.411519 | -3.25943 | 0.00201  | 0.046877 | -1.63116 |
| ILMN_1744046 | 0.08911  | 7.48544  | 3.709958 | 0.00052  | 0.020881 | -0.38643 |
| ILMN_2359453 | -0.0891  | 10.66599 | -3.6021  | 0.000725 | 0.025082 | -0.69303 |
| ILMN_1807243 | 0.08904  | 7.320598 | 3.680125 | 0.00057  | 0.022048 | -0.47174 |
| ILMN_1808354 | 0.089028 | 6.543877 | 4.786569 | 1.54E-05 | 0.002396 | 2.907637 |
| ILMN_2298936 | 0.08898  | 10.25468 | 3.754698 | 0.000453 | 0.019291 | -0.25777 |
| ILMN_1812441 | -0.08894 | 8.001096 | -4.04156 | 0.000183 | 0.011298 | 0.586289 |
| ILMN_1764323 | 0.088928 | 9.198453 | 4.519734 | 3.80E-05 | 0.004029 | 2.057692 |
| ILMN_1658027 | 0.088786 | 7.183461 | 3.841573 | 0.000345 | 0.016505 | -0.00558 |
| ILMN_2222880 | -0.08878 | 6.836397 | -3.33813 | 0.001597 | 0.040435 | -1.4208  |
| ILMN_1807540 | -0.08865 | 7.603404 | -3.44223 | 0.001174 | 0.033169 | -1.13777 |
| ILMN_1815024 | 0.0886   | 10.93684 | 3.322375 | 0.001673 | 0.04148  | -1.46316 |
| ILMN_1722276 | -0.08855 | 8.935431 | -3.94592 | 0.000248 | 0.013644 | 0.301327 |
| ILMN_1774890 | 0.088423 | 7.438108 | 4.614848 | 2.76E-05 | 0.003354 | 2.358555 |
| ILMN_1799367 | 0.088394 | 10.52339 | 3.311507 | 0.001727 | 0.04235  | -1.49231 |
| ILMN_2395240 | 0.088353 | 7.737161 | 3.692482 | 0.000549 | 0.021538 | -0.43645 |
| ILMN_2334204 | 0.088293 | 6.883614 | 3.596601 | 0.000737 | 0.025277 | -0.70852 |
| ILMN_1752270 | 0.088241 | 6.838127 | 4.589765 | 3.01E-05 | 0.003562 | 2.278978 |
| ILMN_3280667 | 0.088137 | 6.652168 | 5.066729 | 5.88E-06 | 0.00138  | 3.817897 |
| ILMN_3228585 | -0.08805 | 8.422743 | -3.43591 | 0.001196 | 0.033496 | -1.15511 |
| ILMN_1801600 | -0.08803 | 8.147344 | -3.62212 | 0.000682 | 0.024479 | -0.63651 |
| ILMN_2396956 | -0.088   | 8.230168 | -3.45983 | 0.001114 | 0.03204  | -1.08939 |
| ILMN_1658437 | 0.087994 | 8.967506 | 3.24452  | 0.002099 | 0.048112 | -1.67065 |
| ILMN_1687971 | -0.08797 | 6.275943 | -3.5352  | 0.000888 | 0.02811  | -0.88058 |
| ILMN_3248758 | 0.087866 | 6.366765 | 4.01892  | 0.000197 | 0.011976 | 0.518527 |
| ILMN_1693771 | 0.087761 | 7.766399 | 3.313234 | 0.001718 | 0.042205 | -1.48768 |
| ILMN_1738767 | -0.08773 | 8.400323 | -4.01149 | 0.000201 | 0.012095 | 0.496342 |
| ILMN_2332558 | 0.087685 | 9.264805 | 3.909933 | 0.000278 | 0.014712 | 0.195001 |
| ILMN_2168992 | 0.087567 | 7.43552  | 4.613289 | 2.78E-05 | 0.00336  | 2.353603 |
| ILMN_1813240 | 0.087538 | 10.31536 | 3.338601 | 0.001595 | 0.040409 | -1.41953 |
| ILMN_1664608 | -0.08753 | 8.508847 | -3.33482 | 0.001613 | 0.0406   | -1.42969 |
| ILMN_2054145 | 0.087506 | 8.440683 | 3.414394 | 0.001275 | 0.034835 | -1.21397 |
| ILMN_1732725 | 0.087491 | 7.960482 | 3.489471 | 0.001019 | 0.030581 | -1.00759 |

|              |          |          |          |          |          |          |
|--------------|----------|----------|----------|----------|----------|----------|
| ILMN_1671809 | -0.0874  | 8.4693   | -3.60512 | 0.000718 | 0.024926 | -0.6845  |
| ILMN_1797367 | -0.08727 | 7.058893 | -3.74307 | 0.00047  | 0.019597 | -0.29128 |
| ILMN_1693221 | 0.087214 | 7.609533 | 3.588494 | 0.000755 | 0.025654 | -0.73133 |
| ILMN_2386100 | 0.08713  | 9.046575 | 3.586667 | 0.000759 | 0.025703 | -0.73647 |
| ILMN_1669308 | 0.087104 | 7.241029 | 4.357398 | 6.53E-05 | 0.005933 | 1.550082 |
| ILMN_1672759 | -0.08708 | 8.162983 | -3.74382 | 0.000468 | 0.019597 | -0.28914 |
| ILMN_1846771 | -0.087   | 6.375979 | -3.34968 | 0.001544 | 0.03952  | -1.38965 |
| ILMN_1689968 | -0.08693 | 6.296841 | -3.5166  | 0.000939 | 0.02914  | -0.93234 |
| ILMN_1730504 | -0.08683 | 6.258881 | -4.35997 | 6.48E-05 | 0.005906 | 1.558051 |
| ILMN_2127477 | 0.08656  | 7.228714 | 3.279431 | 0.001897 | 0.045001 | -1.578   |
| ILMN_1653553 | 0.086531 | 6.729792 | 3.919256 | 0.00027  | 0.014439 | 0.222498 |
| ILMN_1672553 | 0.086432 | 5.859542 | 3.662729 | 0.000602 | 0.022725 | -0.52131 |
| ILMN_1801378 | 0.086427 | 8.348091 | 3.494354 | 0.001004 | 0.030366 | -0.99407 |
| ILMN_1727300 | -0.08639 | 7.468963 | -4.65465 | 2.42E-05 | 0.003035 | 2.485162 |
| ILMN_1702231 | -0.08628 | 6.19729  | -3.89986 | 0.000287 | 0.015027 | 0.165338 |
| ILMN_1688089 | 0.086247 | 10.74743 | 4.027276 | 0.000191 | 0.011744 | 0.543514 |
| ILMN_2129388 | -0.08624 | 7.4324   | -3.57103 | 0.000796 | 0.026314 | -0.78038 |
| ILMN_1786976 | -0.08622 | 8.587619 | -3.53794 | 0.00088  | 0.027977 | -0.87294 |
| ILMN_1679881 | 0.086126 | 7.188561 | 3.3374   | 0.001601 | 0.040464 | -1.42276 |
| ILMN_2333687 | -0.08611 | 6.597974 | -3.85092 | 0.000335 | 0.016288 | 0.021745 |
| ILMN_1665219 | -0.0861  | 7.18645  | -4.30143 | 7.85E-05 | 0.00651  | 1.376917 |
| ILMN_1668605 | 0.086063 | 7.037081 | 4.094621 | 0.000154 | 0.010027 | 0.745832 |
| ILMN_1751984 | -0.08598 | 7.97319  | -5.17162 | 4.09E-06 | 0.001101 | 4.162726 |
| ILMN_2055165 | -0.08588 | 11.24432 | -3.5241  | 0.000918 | 0.02876  | -0.91149 |
| ILMN_1730799 | -0.08588 | 7.340899 | -3.23454 | 0.00216  | 0.049076 | -1.69703 |
| ILMN_1733690 | 0.085881 | 6.916004 | 3.768766 | 0.000433 | 0.018774 | -0.21715 |
| ILMN_2393544 | -0.08584 | 7.652228 | -4.42374 | 5.24E-05 | 0.005033 | 1.756601 |
| ILMN_1802377 | -0.08582 | 6.874295 | -3.63528 | 0.000655 | 0.023869 | -0.59924 |
| ILMN_2043828 | 0.085792 | 6.634683 | 3.606668 | 0.000715 | 0.024876 | -0.68014 |
| ILMN_1668465 | 0.085735 | 6.090794 | 4.112777 | 0.000145 | 0.009652 | 0.800651 |
| ILMN_3263329 | 0.085579 | 8.816942 | 3.275277 | 0.00192  | 0.045423 | -1.58906 |
| ILMN_2399523 | -0.08557 | 7.83665  | -3.50468 | 0.000973 | 0.029778 | -0.96546 |
| ILMN_1784367 | 0.085471 | 7.22628  | 3.645566 | 0.000634 | 0.023517 | -0.57008 |
| ILMN_3182422 | -0.0854  | 7.415648 | -3.40974 | 0.001293 | 0.035153 | -1.22667 |
| ILMN_1770053 | 0.085396 | 10.21354 | 4.210583 | 0.000106 | 0.007599 | 1.097927 |
| ILMN_1733875 | -0.08539 | 7.811225 | -3.84374 | 0.000343 | 0.016439 | 0.000749 |
| ILMN_1672389 | 0.08537  | 9.105181 | 4.397957 | 5.71E-05 | 0.005349 | 1.67618  |
| ILMN_1740005 | 0.085322 | 6.181646 | 3.253961 | 0.002042 | 0.047308 | -1.64566 |
| ILMN_2061405 | 0.08531  | 9.813282 | 3.439962 | 0.001182 | 0.03323  | -1.14399 |
| ILMN_1814074 | -0.08523 | 7.334847 | -3.26108 | 0.002    | 0.046758 | -1.62677 |
| ILMN_1755822 | 0.085191 | 6.523157 | 4.233023 | 9.83E-05 | 0.00731  | 1.166587 |
| ILMN_1759954 | 0.085123 | 11.03952 | 4.471564 | 4.47E-05 | 0.004545 | 1.906273 |
| ILMN_1811104 | -0.08511 | 9.073405 | -3.77376 | 0.000427 | 0.018648 | -0.20271 |
| ILMN_2206344 | -0.08506 | 6.519048 | -4.64749 | 2.47E-05 | 0.003081 | 2.462371 |
| ILMN_2412172 | -0.08505 | 6.932103 | -3.69369 | 0.000547 | 0.021487 | -0.43299 |
| ILMN_1772713 | -0.08504 | 9.535364 | -3.45053 | 0.001145 | 0.032625 | -1.11498 |
| ILMN_2174380 | 0.084822 | 6.2976   | 3.844757 | 0.000342 | 0.016419 | 0.003718 |
| ILMN_1694752 | -0.0848  | 7.069329 | -4.24355 | 9.50E-05 | 0.007245 | 1.198861 |
| ILMN_1782439 | -0.08466 | 10.19497 | -4.27804 | 8.48E-05 | 0.00693  | 1.304826 |
| ILMN_2201533 | 0.084621 | 9.821846 | 3.636454 | 0.000652 | 0.023869 | -0.59592 |
| ILMN_3307700 | 0.084519 | 8.613779 | 3.320574 | 0.001682 | 0.04148  | -1.468   |
| ILMN_1701308 | -0.08438 | 6.375542 | -3.61922 | 0.000688 | 0.024517 | -0.64469 |
| ILMN_1731612 | 0.084301 | 9.136684 | 3.285415 | 0.001864 | 0.04455  | -1.56205 |
| ILMN_2048822 | 0.084167 | 7.98774  | 3.775983 | 0.000424 | 0.018543 | -0.19627 |

|              |          |          |          |          |          |          |
|--------------|----------|----------|----------|----------|----------|----------|
| ILMN_1761058 | -0.0841  | 7.335681 | -4.32297 | 7.32E-05 | 0.006322 | 1.44345  |
| ILMN_1786016 | 0.084098 | 7.078864 | 4.449472 | 4.81E-05 | 0.00478  | 1.837049 |
| ILMN_1677747 | 0.084084 | 6.347556 | 3.488612 | 0.001022 | 0.030581 | -1.00997 |
| ILMN_1655206 | -0.08401 | 6.955883 | -4.51284 | 3.89E-05 | 0.004079 | 2.035988 |
| ILMN_1805658 | 0.083964 | 9.531575 | 4.212122 | 0.000105 | 0.007592 | 1.102632 |
| ILMN_1709479 | 0.083826 | 10.3083  | 3.352089 | 0.001533 | 0.039387 | -1.38316 |
| ILMN_1792748 | -0.08379 | 6.144422 | -3.42422 | 0.001238 | 0.03413  | -1.18712 |
| ILMN_2333865 | -0.0837  | 7.367843 | -3.62065 | 0.000685 | 0.024488 | -0.64065 |
| ILMN_1766000 | 0.083672 | 8.079881 | 3.614132 | 0.000698 | 0.024597 | -0.65907 |
| ILMN_1724907 | 0.083636 | 8.172697 | 3.396137 | 0.001346 | 0.036004 | -1.26374 |
| ILMN_2383419 | 0.083612 | 6.691453 | 3.76531  | 0.000438 | 0.018882 | -0.22714 |
| ILMN_1728059 | 0.083584 | 7.675856 | 3.241936 | 0.002115 | 0.048409 | -1.67749 |
| ILMN_1719256 | 0.083579 | 10.98633 | 3.541397 | 0.000871 | 0.027789 | -0.86329 |
| ILMN_1744268 | -0.08358 | 8.45024  | -3.47446 | 0.001066 | 0.031169 | -1.04908 |
| ILMN_1781001 | 0.083556 | 6.255321 | 4.536037 | 3.60E-05 | 0.003915 | 2.109088 |
| ILMN_1727281 | 0.083553 | 7.373109 | 3.730228 | 0.000489 | 0.019993 | -0.32824 |
| ILMN_2389810 | 0.08355  | 7.036976 | 4.440151 | 4.96E-05 | 0.004864 | 1.807882 |
| ILMN_3309694 | 0.083544 | 6.60877  | 4.24541  | 9.44E-05 | 0.007245 | 1.20456  |
| ILMN_3258795 | -0.08343 | 8.134018 | -3.59475 | 0.000741 | 0.025369 | -0.71371 |
| ILMN_1693004 | -0.08337 | 7.82199  | -3.23461 | 0.00216  | 0.049076 | -1.69683 |
| ILMN_1734153 | -0.08336 | 7.901925 | -3.82568 | 0.000363 | 0.017019 | -0.05196 |
| ILMN_1684771 | 0.083242 | 9.93225  | 5.324702 | 2.39E-06 | 0.000807 | 4.669393 |
| ILMN_1793033 | 0.083234 | 7.364432 | 3.642537 | 0.00064  | 0.023635 | -0.57868 |
| ILMN_2184640 | 0.08322  | 8.438208 | 3.455299 | 0.001129 | 0.032269 | -1.10186 |
| ILMN_1712894 | -0.08297 | 5.769308 | -4.54417 | 3.51E-05 | 0.003881 | 2.134767 |
| ILMN_2332691 | -0.08297 | 5.726569 | -3.86732 | 0.000318 | 0.015905 | 0.069734 |
| ILMN_1758173 | 0.082933 | 9.107964 | 3.915868 | 0.000273 | 0.014527 | 0.212501 |
| ILMN_1737360 | -0.08292 | 5.933497 | -3.95177 | 0.000244 | 0.013439 | 0.318665 |
| ILMN_2181125 | -0.08282 | 7.1485   | -3.97332 | 0.000227 | 0.013051 | 0.382629 |
| ILMN_1758672 | 0.082822 | 6.513335 | 3.491768 | 0.001012 | 0.03047  | -1.00123 |
| ILMN_1813836 | 0.08282  | 11.55781 | 4.296619 | 7.98E-05 | 0.006598 | 1.362066 |
| ILMN_1787280 | 0.082812 | 8.156233 | 3.595238 | 0.00074  | 0.025357 | -0.71235 |
| ILMN_1806705 | -0.08279 | 6.603107 | -3.48101 | 0.001045 | 0.030982 | -1.03097 |
| ILMN_2341952 | 0.082774 | 9.93769  | 3.671564 | 0.000586 | 0.022361 | -0.49615 |
| ILMN_1802894 | 0.082693 | 8.105851 | 3.58096  | 0.000773 | 0.02583  | -0.75251 |
| ILMN_3265365 | 0.082645 | 7.30924  | 3.728909 | 0.000491 | 0.020041 | -0.33204 |
| ILMN_2149053 | 0.082626 | 8.052889 | 3.832433 | 0.000355 | 0.01681  | -0.03226 |
| ILMN_1682818 | -0.08259 | 6.036895 | -3.65471 | 0.000617 | 0.023065 | -0.5441  |
| ILMN_1658110 | 0.082474 | 7.626379 | 3.824949 | 0.000364 | 0.017034 | -0.05408 |
| ILMN_2081335 | 0.082468 | 9.44052  | 4.129928 | 0.000138 | 0.009242 | 0.852542 |
| ILMN_2364131 | -0.08242 | 8.838955 | -4.31496 | 7.51E-05 | 0.006438 | 1.418687 |
| ILMN_2189406 | 0.082413 | 6.306606 | 3.473026 | 0.00107  | 0.03123  | -1.05303 |
| ILMN_1760635 | 0.082271 | 8.191383 | 3.695128 | 0.000545 | 0.021487 | -0.42888 |
| ILMN_1813275 | -0.0822  | 10.06034 | -3.2861  | 0.00186  | 0.044502 | -1.56022 |
| ILMN_2313730 | -0.08211 | 11.72703 | -3.33504 | 0.001612 | 0.0406   | -1.42911 |
| ILMN_1767747 | 0.082073 | 11.16732 | 4.061661 | 0.000171 | 0.010785 | 0.646609 |
| ILMN_2224143 | 0.082045 | 11.33141 | 3.600033 | 0.000729 | 0.025189 | -0.69885 |
| ILMN_1719010 | -0.08192 | 6.77102  | -3.68483 | 0.000562 | 0.021828 | -0.4583  |
| ILMN_1666078 | 0.081842 | 7.427113 | 4.15825  | 0.000125 | 0.008702 | 0.938459 |
| ILMN_1750088 | 0.081809 | 8.257719 | 3.484047 | 0.001036 | 0.030781 | -1.02259 |
| ILMN_1728975 | 0.081758 | 9.406542 | 4.804829 | 1.45E-05 | 0.00235  | 2.966445 |
| ILMN_2407799 | 0.081753 | 6.374703 | 4.356171 | 6.56E-05 | 0.005933 | 1.546274 |
| ILMN_1667577 | 0.081696 | 8.29085  | 4.330351 | 7.14E-05 | 0.006248 | 1.46627  |
| ILMN_1762529 | 0.081631 | 7.058434 | 3.359072 | 0.001502 | 0.038788 | -1.36429 |

|              |          |          |          |          |          |          |
|--------------|----------|----------|----------|----------|----------|----------|
| ILMN_1731184 | 0.081574 | 9.208038 | 3.325029 | 0.00166  | 0.041263 | -1.45604 |
| ILMN_1704842 | 0.081547 | 6.070801 | 3.226334 | 0.002212 | 0.049948 | -1.71867 |
| ILMN_1808047 | 0.081517 | 6.950668 | 3.488103 | 0.001023 | 0.030581 | -1.01138 |
| ILMN_1678037 | 0.081462 | 7.767013 | 3.527094 | 0.00091  | 0.028593 | -0.90316 |
| ILMN_2357193 | 0.0814   | 6.711349 | 3.637578 | 0.00065  | 0.023869 | -0.59274 |
| ILMN_1659343 | 0.081338 | 10.95083 | 4.247954 | 9.36E-05 | 0.007224 | 1.212365 |
| ILMN_1663383 | 0.08133  | 6.846656 | 3.617404 | 0.000692 | 0.024553 | -0.64983 |
| ILMN_3207933 | 0.081306 | 9.839309 | 3.3181   | 0.001694 | 0.041748 | -1.47464 |
| ILMN_2043306 | -0.08129 | 5.970853 | -3.43437 | 0.001202 | 0.033496 | -1.15931 |
| ILMN_1745593 | 0.081288 | 7.46409  | 3.724303 | 0.000498 | 0.020244 | -0.34527 |
| ILMN_1660844 | 0.081264 | 8.236984 | 4.224095 | 0.000101 | 0.00739  | 1.139251 |
| ILMN_1805863 | -0.08117 | 7.372344 | -3.44022 | 0.001181 | 0.03323  | -1.14328 |
| ILMN_2054362 | 0.08103  | 7.511284 | 4.051363 | 0.000177 | 0.011007 | 0.615689 |
| ILMN_1784328 | 0.080957 | 6.665213 | 3.694721 | 0.000545 | 0.021487 | -0.43005 |
| ILMN_1680196 | 0.080947 | 10.99316 | 3.706282 | 0.000526 | 0.020981 | -0.39696 |
| ILMN_1815306 | -0.08091 | 7.293171 | -3.53515 | 0.000888 | 0.02811  | -0.88071 |
| ILMN_3246391 | 0.080854 | 7.146863 | 3.265377 | 0.001976 | 0.046399 | -1.61538 |
| ILMN_1749709 | -0.08083 | 10.32535 | -3.30099 | 0.001781 | 0.043302 | -1.52046 |
| ILMN_1690252 | 0.080797 | 7.900762 | 3.404312 | 0.001314 | 0.035472 | -1.24148 |
| ILMN_1787511 | 0.080774 | 7.670593 | 4.312161 | 7.58E-05 | 0.006438 | 1.410034 |
| ILMN_1739199 | -0.08075 | 7.359269 | -3.60801 | 0.000712 | 0.024854 | -0.67636 |
| ILMN_1682449 | -0.0807  | 8.461128 | -3.7436  | 0.000469 | 0.019597 | -0.28977 |
| ILMN_2179726 | 0.080692 | 6.727532 | 4.682542 | 2.20E-05 | 0.002875 | 2.574133 |
| ILMN_1811592 | 0.080626 | 8.778322 | 3.240936 | 0.002121 | 0.048485 | -1.68013 |
| ILMN_2411559 | 0.08057  | 7.212475 | 4.535305 | 3.61E-05 | 0.003915 | 2.106779 |
| ILMN_2381603 | 0.080472 | 6.52753  | 4.326199 | 7.24E-05 | 0.006307 | 1.453427 |
| ILMN_1791186 | 0.080464 | 6.060227 | 3.566311 | 0.000808 | 0.026563 | -0.79361 |
| ILMN_1675186 | 0.080395 | 7.954593 | 3.741507 | 0.000472 | 0.019645 | -0.29579 |
| ILMN_1659564 | -0.08036 | 9.782527 | -3.78092 | 0.000417 | 0.018376 | -0.18198 |
| ILMN_1670948 | -0.08034 | 8.812808 | -3.83179 | 0.000356 | 0.01681  | -0.03413 |
| ILMN_1769751 | -0.08026 | 7.054067 | -4.00363 | 0.000206 | 0.012278 | 0.472882 |
| ILMN_1791508 | -0.08026 | 6.284753 | -3.71453 | 0.000513 | 0.020708 | -0.37332 |
| ILMN_1680386 | 0.080169 | 6.946894 | 4.805962 | 1.44E-05 | 0.00235  | 2.970095 |
| ILMN_1696133 | 0.080143 | 6.850996 | 3.267319 | 0.001965 | 0.04627  | -1.61022 |
| ILMN_2221014 | 0.080079 | 6.324599 | 3.71165  | 0.000518 | 0.020845 | -0.38158 |
| ILMN_3248701 | 0.080074 | 5.966318 | 3.557982 | 0.000829 | 0.0269   | -0.81694 |
| ILMN_1802157 | 0.080044 | 8.26044  | 5.000485 | 7.40E-06 | 0.001515 | 3.601193 |
| ILMN_2313821 | 0.080043 | 8.017746 | 5.242097 | 3.20E-06 | 0.000935 | 4.39551  |
| ILMN_1772894 | 0.080042 | 6.317472 | 3.677669 | 0.000575 | 0.022073 | -0.47874 |
| ILMN_3239130 | -0.07999 | 6.88769  | -3.98914 | 0.000216 | 0.012681 | 0.429689 |
| ILMN_1730523 | 0.079994 | 7.930678 | 3.322259 | 0.001674 | 0.04148  | -1.46347 |
| ILMN_3246353 | 0.079957 | 7.169918 | 3.480361 | 0.001047 | 0.031017 | -1.03278 |
| ILMN_3228700 | 0.079955 | 6.753811 | 3.868023 | 0.000318 | 0.015893 | 0.071807 |
| ILMN_1772703 | 0.079913 | 7.706179 | 3.583369 | 0.000767 | 0.025767 | -0.74574 |
| ILMN_1664030 | 0.079805 | 7.490503 | 3.432207 | 0.001209 | 0.033515 | -1.16525 |
| ILMN_1710756 | 0.079783 | 13.051   | 3.496795 | 0.000997 | 0.03026  | -0.98731 |
| ILMN_3295874 | -0.0797  | 6.768968 | -3.28323 | 0.001876 | 0.044659 | -1.56787 |
| ILMN_1753613 | -0.07968 | 7.234789 | -3.38911 | 0.001374 | 0.036444 | -1.28286 |
| ILMN_3248263 | -0.07964 | 7.573761 | -3.89703 | 0.00029  | 0.015117 | 0.156992 |
| ILMN_1669598 | 0.079614 | 7.075846 | 4.670027 | 2.29E-05 | 0.002961 | 2.53419  |
| ILMN_1778238 | 0.079583 | 9.702043 | 4.272094 | 8.65E-05 | 0.006983 | 1.286527 |
| ILMN_1734826 | 0.07951  | 10.01109 | 3.572528 | 0.000793 | 0.02627  | -0.77618 |
| ILMN_1674706 | 0.079505 | 8.760991 | 3.636429 | 0.000652 | 0.023869 | -0.59599 |
| ILMN_1708513 | -0.07948 | 5.683599 | -3.8151  | 0.000375 | 0.017296 | -0.08275 |

|              |          |          |          |          |          |          |
|--------------|----------|----------|----------|----------|----------|----------|
| ILMN_1793476 | -0.07947 | 8.059651 | -3.54726 | 0.000856 | 0.027503 | -0.8469  |
| ILMN_1793371 | -0.07947 | 8.352824 | -3.58083 | 0.000773 | 0.02583  | -0.75287 |
| ILMN_2350801 | -0.07937 | 6.091863 | -4.23287 | 9.84E-05 | 0.00731  | 1.166133 |
| ILMN_2395236 | 0.079362 | 7.819576 | 3.452316 | 0.001139 | 0.032531 | -1.11006 |
| ILMN_1782954 | 0.07932  | 9.122717 | 3.395489 | 0.001349 | 0.036018 | -1.26551 |
| ILMN_2391512 | 0.079107 | 6.565384 | 3.268316 | 0.001959 | 0.046193 | -1.60757 |
| ILMN_1737416 | -0.07906 | 7.319151 | -3.2631  | 0.001989 | 0.046643 | -1.62141 |
| ILMN_2405009 | -0.07903 | 9.694206 | -3.36608 | 0.001471 | 0.038281 | -1.34533 |
| ILMN_1750130 | 0.079019 | 11.2397  | 4.002689 | 0.000207 | 0.01229  | 0.470062 |
| ILMN_1690282 | 0.079003 | 7.509177 | 4.086933 | 0.000158 | 0.010162 | 0.722653 |
| ILMN_1796968 | 0.078969 | 7.273116 | 3.678854 | 0.000573 | 0.022063 | -0.47536 |
| ILMN_1654518 | -0.07871 | 6.571465 | -3.36108 | 0.001493 | 0.038607 | -1.35886 |
| ILMN_1745110 | -0.07867 | 9.549561 | -3.85344 | 0.000333 | 0.016239 | 0.029104 |
| ILMN_3212373 | 0.078631 | 9.858828 | 3.535547 | 0.000887 | 0.02811  | -0.87961 |
| ILMN_1690138 | 0.078628 | 7.195188 | 4.477663 | 4.38E-05 | 0.004467 | 1.925408 |
| ILMN_2347298 | -0.07858 | 6.47501  | -3.37399 | 0.001437 | 0.037626 | -1.32392 |
| ILMN_1893633 | 0.078527 | 6.969511 | 3.474988 | 0.001064 | 0.031169 | -1.04761 |
| ILMN_1662905 | 0.078507 | 12.26727 | 3.749181 | 0.000461 | 0.019441 | -0.27369 |
| ILMN_2083243 | 0.078502 | 8.487235 | 4.251653 | 9.25E-05 | 0.007221 | 1.223716 |
| ILMN_2246894 | -0.07849 | 10.12191 | -3.69036 | 0.000553 | 0.021556 | -0.44251 |
| ILMN_2414007 | 0.078437 | 6.757321 | 4.019993 | 0.000196 | 0.011957 | 0.521734 |
| ILMN_1755758 | 0.078412 | 6.846843 | 3.333351 | 0.00162  | 0.040674 | -1.43366 |
| ILMN_1653822 | 0.078242 | 6.814945 | 4.02839  | 0.000191 | 0.011723 | 0.546847 |
| ILMN_3306388 | 0.078231 | 6.678257 | 4.010053 | 0.000202 | 0.012129 | 0.492039 |
| ILMN_1668657 | 0.078209 | 6.905298 | 4.59906  | 2.91E-05 | 0.003489 | 2.308447 |
| ILMN_2182531 | 0.078112 | 9.98976  | 3.762551 | 0.000442 | 0.018974 | -0.23511 |
| ILMN_1721977 | 0.078102 | 8.948922 | 3.86279  | 0.000323 | 0.01604  | 0.056475 |
| ILMN_1700232 | 0.078096 | 8.155792 | 3.928519 | 0.000262 | 0.014219 | 0.249853 |
| ILMN_1653836 | -0.07809 | 6.280264 | -3.72412 | 0.000498 | 0.020244 | -0.34579 |
| ILMN_1842850 | -0.07808 | 6.399931 | -3.50399 | 0.000975 | 0.029813 | -0.96736 |
| ILMN_2221673 | 0.078025 | 9.902959 | 3.240027 | 0.002126 | 0.048536 | -1.68253 |
| ILMN_1795865 | -0.07799 | 7.208199 | -3.64819 | 0.000629 | 0.023404 | -0.56263 |
| ILMN_2406501 | 0.077905 | 7.147169 | 3.50994  | 0.000958 | 0.029485 | -0.95086 |
| ILMN_1811574 | -0.07789 | 8.301684 | -3.27289 | 0.001933 | 0.045678 | -1.59542 |
| ILMN_1755910 | -0.07783 | 6.575995 | -3.83266 | 0.000355 | 0.01681  | -0.0316  |
| ILMN_3255144 | 0.077718 | 6.471177 | 3.61538  | 0.000696 | 0.024558 | -0.65555 |
| ILMN_2286024 | 0.077714 | 5.747321 | 5.488709 | 1.34E-06 | 0.000565 | 5.216214 |
| ILMN_1736176 | 0.077657 | 7.014995 | 3.85363  | 0.000332 | 0.016239 | 0.02966  |
| ILMN_1798940 | 0.077607 | 6.881157 | 4.087774 | 0.000158 | 0.010155 | 0.725188 |
| ILMN_2113362 | 0.0775   | 6.918771 | 3.585963 | 0.000761 | 0.025703 | -0.73845 |
| ILMN_3234884 | 0.077488 | 8.666052 | 3.378191 | 0.00142  | 0.037331 | -1.31251 |
| ILMN_1702384 | -0.07739 | 7.422851 | -3.2846  | 0.001868 | 0.044572 | -1.56424 |
| ILMN_2050617 | 0.077363 | 10.63245 | 3.231026 | 0.002182 | 0.049513 | -1.7063  |
| ILMN_1753265 | -0.07733 | 6.468278 | -3.64727 | 0.000631 | 0.023445 | -0.56524 |
| ILMN_2352934 | 0.07731  | 6.588773 | 3.63185  | 0.000662 | 0.02392  | -0.60897 |
| ILMN_2181992 | -0.07729 | 6.769124 | -3.39566 | 0.001348 | 0.036018 | -1.26503 |
| ILMN_1688848 | -0.07717 | 6.092466 | -3.32156 | 0.001677 | 0.04148  | -1.46535 |
| ILMN_1720965 | -0.07713 | 7.884281 | -3.28967 | 0.001841 | 0.044165 | -1.55071 |
| ILMN_1805148 | -0.07703 | 6.428121 | -4.53149 | 3.66E-05 | 0.00394  | 2.09476  |
| ILMN_1813246 | 0.077022 | 9.378718 | 3.28526  | 0.001865 | 0.04455  | -1.56247 |
| ILMN_1798543 | 0.076998 | 7.458454 | 3.615543 | 0.000695 | 0.024558 | -0.65509 |
| ILMN_1723843 | -0.07696 | 8.337517 | -3.97432 | 0.000227 | 0.013051 | 0.385604 |
| ILMN_1755620 | -0.07688 | 6.813174 | -3.41062 | 0.00129  | 0.035117 | -1.22428 |
| ILMN_1698015 | -0.07683 | 6.189212 | -4.16998 | 0.000121 | 0.008445 | 0.974109 |

|              |          |          |          |          |          |          |
|--------------|----------|----------|----------|----------|----------|----------|
| ILMN_1655952 | -0.07679 | 9.16614  | -3.40274 | 0.00132  | 0.035549 | -1.24577 |
| ILMN_1749243 | 0.076612 | 7.439673 | 3.620291 | 0.000685 | 0.024488 | -0.64167 |
| ILMN_1653283 | -0.07654 | 6.972005 | -3.29923 | 0.00179  | 0.043403 | -1.52517 |
| ILMN_2162799 | 0.076527 | 7.112451 | 4.571098 | 3.20E-05 | 0.003708 | 2.219862 |
| ILMN_1775823 | -0.0764  | 7.617423 | -3.29532 | 0.001811 | 0.04375  | -1.53562 |
| ILMN_1856634 | 0.076278 | 6.904764 | 3.388604 | 0.001377 | 0.036444 | -1.28423 |
| ILMN_1794122 | -0.07625 | 5.774116 | -4.19694 | 0.000111 | 0.007879 | 1.05627  |
| ILMN_1782633 | 0.076245 | 10.44958 | 3.779809 | 0.000419 | 0.018393 | -0.1852  |
| ILMN_1663042 | -0.07605 | 9.702589 | -3.28277 | 0.001878 | 0.044661 | -1.5691  |
| ILMN_1700378 | 0.075958 | 7.794192 | 3.401631 | 0.001324 | 0.035568 | -1.24878 |
| ILMN_1772743 | 0.075933 | 8.542248 | 3.466927 | 0.00109  | 0.031665 | -1.06985 |
| ILMN_1760933 | 0.075921 | 7.729166 | 3.706151 | 0.000526 | 0.020981 | -0.39734 |
| ILMN_1662417 | 0.075882 | 8.315637 | 4.021399 | 0.000195 | 0.011925 | 0.525937 |
| ILMN_2389528 | 0.07578  | 6.108071 | 4.519325 | 3.81E-05 | 0.004029 | 2.056405 |
| ILMN_1782377 | 0.075657 | 8.15753  | 4.111194 | 0.000146 | 0.009669 | 0.795867 |
| ILMN_1686835 | 0.075618 | 6.816222 | 3.564635 | 0.000812 | 0.026563 | -0.79831 |
| ILMN_3247906 | -0.07555 | 8.076963 | -3.6052  | 0.000718 | 0.024926 | -0.68429 |
| ILMN_2411794 | -0.07554 | 8.508565 | -3.86833 | 0.000317 | 0.015893 | 0.072697 |
| ILMN_3268403 | -0.07553 | 5.923422 | -3.82454 | 0.000364 | 0.017034 | -0.05527 |
| ILMN_3242462 | 0.075357 | 6.881228 | 3.796151 | 0.000398 | 0.017959 | -0.13783 |
| ILMN_3238452 | -0.07516 | 7.509117 | -4.23607 | 9.73E-05 | 0.00731  | 1.175915 |
| ILMN_2397571 | 0.075105 | 6.875508 | 3.262733 | 0.001991 | 0.046662 | -1.6224  |
| ILMN_1672547 | -0.07507 | 7.394584 | -3.39409 | 0.001354 | 0.03607  | -1.2693  |
| ILMN_2410742 | -0.075   | 8.216274 | -3.48709 | 0.001026 | 0.030581 | -1.01418 |
| ILMN_1758827 | 0.074967 | 7.92998  | 3.889707 | 0.000297 | 0.015308 | 0.13546  |
| ILMN_1724333 | -0.07495 | 7.319627 | -4.25663 | 9.10E-05 | 0.007161 | 1.239001 |
| ILMN_1678454 | 0.074936 | 9.454743 | 3.259581 | 0.002009 | 0.046877 | -1.63076 |
| ILMN_1729868 | 0.074827 | 6.96272  | 4.090434 | 0.000156 | 0.010087 | 0.733206 |
| ILMN_1783337 | 0.074779 | 6.847807 | 3.672166 | 0.000585 | 0.022356 | -0.49443 |
| ILMN_2224990 | 0.074776 | 6.33814  | 4.000827 | 0.000208 | 0.012321 | 0.464508 |
| ILMN_2191313 | -0.07467 | 6.159919 | -4.22676 | 0.0001   | 0.007349 | 1.147393 |
| ILMN_1780292 | 0.074581 | 6.06516  | 4.514634 | 3.87E-05 | 0.004079 | 2.041629 |
| ILMN_1771903 | 0.074547 | 10.2093  | 3.666718 | 0.000594 | 0.022547 | -0.50995 |
| ILMN_2377430 | -0.07448 | 7.648643 | -4.00432 | 0.000206 | 0.012278 | 0.474927 |
| ILMN_1708029 | -0.07443 | 5.796382 | -3.73598 | 0.00048  | 0.01977  | -0.3117  |
| ILMN_1695962 | -0.07437 | 7.735068 | -3.87548 | 0.00031  | 0.01567  | 0.093666 |
| ILMN_1797499 | 0.074313 | 7.334307 | 3.368553 | 0.001461 | 0.038118 | -1.33864 |
| ILMN_1662364 | 0.074304 | 9.771747 | 3.484838 | 0.001033 | 0.03075  | -1.0204  |
| ILMN_1721034 | -0.07426 | 6.996372 | -3.66974 | 0.000589 | 0.022452 | -0.50134 |
| ILMN_1691131 | 0.074258 | 8.694918 | 3.854193 | 0.000332 | 0.016239 | 0.031306 |
| ILMN_1662161 | -0.07413 | 6.398688 | -3.79196 | 0.000403 | 0.018034 | -0.14999 |
| ILMN_3289262 | 0.074085 | 9.609777 | 3.998395 | 0.00021  | 0.012375 | 0.457257 |
| ILMN_1778611 | 0.074009 | 8.430149 | 3.564996 | 0.000811 | 0.026563 | -0.79729 |
| ILMN_1765923 | 0.073932 | 6.748245 | 3.806041 | 0.000386 | 0.017643 | -0.1091  |
| ILMN_1849941 | -0.07391 | 6.628758 | -3.42869 | 0.001222 | 0.033786 | -1.17487 |
| ILMN_1790461 | 0.073742 | 10.46785 | 3.590287 | 0.000751 | 0.025581 | -0.72629 |
| ILMN_1710979 | 0.073673 | 7.122279 | 3.725241 | 0.000496 | 0.020222 | -0.34258 |
| ILMN_1810838 | 0.073652 | 10.17688 | 3.945015 | 0.000249 | 0.013644 | 0.298648 |
| ILMN_1772706 | -0.07358 | 7.77093  | -3.26154 | 0.001998 | 0.046728 | -1.62557 |
| ILMN_1761858 | -0.07347 | 8.379168 | -3.51936 | 0.000931 | 0.02902  | -0.92467 |
| ILMN_1654861 | -0.07345 | 7.784018 | -3.29967 | 0.001788 | 0.043394 | -1.524   |
| ILMN_1789627 | -0.07337 | 6.247496 | -3.61834 | 0.00069  | 0.024533 | -0.64719 |
| ILMN_1774990 | 0.073274 | 8.209856 | 3.349791 | 0.001544 | 0.03952  | -1.38936 |
| ILMN_1682996 | 0.073103 | 6.480388 | 3.505524 | 0.000971 | 0.029728 | -0.96311 |

|              |          |          |          |          |          |          |
|--------------|----------|----------|----------|----------|----------|----------|
| ILMN_1662184 | 0.073051 | 6.902236 | 3.419456 | 0.001256 | 0.034507 | -1.20014 |
| ILMN_1726512 | -0.07297 | 5.750646 | -3.63339 | 0.000659 | 0.02392  | -0.60461 |
| ILMN_1807074 | 0.072952 | 12.4116  | 3.988597 | 0.000217 | 0.012682 | 0.428063 |
| ILMN_1697544 | -0.07286 | 6.54915  | -3.45162 | 0.001141 | 0.032558 | -1.11197 |
| ILMN_1781257 | 0.072847 | 7.109016 | 3.665912 | 0.000596 | 0.022553 | -0.51225 |
| ILMN_1814247 | -0.07284 | 8.133792 | -3.65235 | 0.000621 | 0.023182 | -0.55081 |
| ILMN_1748916 | 0.07278  | 9.077889 | 4.057512 | 0.000174 | 0.010831 | 0.634146 |
| ILMN_1758895 | -0.07277 | 5.959237 | -3.43292 | 0.001207 | 0.033515 | -1.16328 |
| ILMN_1707534 | 0.072741 | 7.520501 | 5.668298 | 7.11E-07 | 0.000373 | 5.819039 |
| ILMN_3236239 | -0.07266 | 6.713216 | -3.37689 | 0.001425 | 0.03743  | -1.31605 |
| ILMN_1655654 | 0.072525 | 7.681589 | 3.542391 | 0.000869 | 0.027756 | -0.86051 |
| ILMN_1727479 | -0.07248 | 9.198404 | -3.54618 | 0.000859 | 0.027517 | -0.84994 |
| ILMN_1667222 | 0.072463 | 7.845548 | 3.247599 | 0.00208  | 0.047878 | -1.66251 |
| ILMN_1765644 | 0.072454 | 9.64981  | 4.001319 | 0.000208 | 0.012321 | 0.465976 |
| ILMN_1783695 | 0.072385 | 10.06995 | 4.106225 | 0.000148 | 0.009806 | 0.780855 |
| ILMN_1777483 | 0.072325 | 6.793192 | 4.63971  | 2.54E-05 | 0.003118 | 2.437595 |
| ILMN_1676233 | 0.072315 | 6.56562  | 4.126677 | 0.000139 | 0.009321 | 0.842699 |
| ILMN_1794781 | -0.07223 | 6.908979 | -4.00409 | 0.000206 | 0.012278 | 0.474228 |
| ILMN_1677440 | -0.07222 | 10.45174 | -3.53898 | 0.000878 | 0.027941 | -0.87004 |
| ILMN_1660579 | 0.072202 | 7.033727 | 3.393951 | 0.001355 | 0.03607  | -1.26969 |
| ILMN_1769634 | 0.072184 | 9.424811 | 3.463424 | 0.001102 | 0.031813 | -1.0795  |
| ILMN_1720442 | -0.07213 | 9.711777 | -3.7334  | 0.000484 | 0.019881 | -0.31911 |
| ILMN_1787199 | 0.072111 | 5.75609  | 3.38485  | 0.001392 | 0.036743 | -1.29443 |
| ILMN_1734553 | -0.07207 | 6.505856 | -4.48471 | 4.28E-05 | 0.004415 | 1.947528 |
| ILMN_1666206 | -0.07207 | 6.701845 | -3.38839 | 0.001377 | 0.036444 | -1.28482 |
| ILMN_2375557 | 0.071972 | 6.017795 | 3.652389 | 0.000621 | 0.023182 | -0.55071 |
| ILMN_2061452 | 0.071961 | 8.406673 | 3.83644  | 0.000351 | 0.016681 | -0.02057 |
| ILMN_1708345 | 0.071837 | 6.267427 | 3.283498 | 0.001874 | 0.044656 | -1.56716 |
| ILMN_1815479 | 0.071832 | 11.76915 | 3.62177  | 0.000682 | 0.024479 | -0.63749 |
| ILMN_1694799 | 0.071807 | 7.960521 | 3.278044 | 0.001904 | 0.045121 | -1.58169 |
| ILMN_1761262 | 0.071738 | 6.502508 | 3.477031 | 0.001058 | 0.031087 | -1.04197 |
| ILMN_1740319 | -0.07173 | 8.118393 | -3.26573 | 0.001974 | 0.046396 | -1.61445 |
| ILMN_1700975 | 0.071665 | 5.799969 | 3.894653 | 0.000292 | 0.015163 | 0.150006 |
| ILMN_1741148 | 0.07157  | 11.2415  | 4.231465 | 9.88E-05 | 0.007317 | 1.161817 |
| ILMN_2361807 | -0.07156 | 6.954242 | -3.4425  | 0.001173 | 0.033169 | -1.13703 |
| ILMN_1711543 | 0.071485 | 7.71451  | 3.510306 | 0.000957 | 0.029485 | -0.94984 |
| ILMN_1709623 | -0.07135 | 6.769465 | -3.90905 | 0.000279 | 0.014731 | 0.192388 |
| ILMN_1793146 | 0.071344 | 7.836729 | 3.389288 | 0.001374 | 0.036444 | -1.28237 |
| ILMN_1804479 | 0.071343 | 10.40331 | 4.210683 | 0.000106 | 0.007599 | 1.098234 |
| ILMN_1680659 | -0.07133 | 6.070394 | -3.33364 | 0.001619 | 0.040673 | -1.43287 |
| ILMN_1783973 | -0.07126 | 6.213538 | -3.80345 | 0.000389 | 0.017716 | -0.11664 |
| ILMN_1746252 | 0.07119  | 10.81671 | 3.477606 | 0.001056 | 0.031069 | -1.04039 |
| ILMN_1654690 | 0.071123 | 8.92939  | 3.364143 | 0.00148  | 0.038388 | -1.35057 |
| ILMN_1727761 | 0.07107  | 6.848968 | 3.750506 | 0.000459 | 0.019384 | -0.26986 |
| ILMN_1748831 | -0.07104 | 7.036402 | -3.69443 | 0.000546 | 0.021487 | -0.43087 |
| ILMN_1793966 | 0.070915 | 6.391729 | 3.796669 | 0.000397 | 0.017953 | -0.13632 |
| ILMN_1716400 | 0.070903 | 6.972341 | 3.388638 | 0.001376 | 0.036444 | -1.28414 |
| ILMN_1706839 | 0.070831 | 8.051776 | 3.690384 | 0.000553 | 0.021556 | -0.44245 |
| ILMN_1651936 | -0.0708  | 8.362008 | -3.52449 | 0.000917 | 0.02876  | -0.91041 |
| ILMN_2278819 | 0.070792 | 6.91849  | 3.577364 | 0.000781 | 0.025949 | -0.76261 |
| ILMN_2130838 | 0.07077  | 9.563752 | 3.286953 | 0.001855 | 0.044454 | -1.55795 |
| ILMN_1698846 | -0.07077 | 5.446632 | -3.27662 | 0.001912 | 0.045277 | -1.58548 |
| ILMN_1739283 | 0.070708 | 8.105886 | 3.570973 | 0.000797 | 0.026314 | -0.78054 |
| ILMN_1769849 | 0.070592 | 5.956987 | 3.96614  | 0.000233 | 0.013176 | 0.361289 |



|              |          |          |          |          |          |          |
|--------------|----------|----------|----------|----------|----------|----------|
| ILMN_1765459 | -0.07059 | 9.787609 | -3.38581 | 0.001388 | 0.036668 | -1.29184 |
| ILMN_1808163 | 0.070583 | 6.654041 | 4.237847 | 9.68E-05 | 0.007301 | 1.181371 |
| ILMN_2194627 | 0.070511 | 7.630318 | 3.451487 | 0.001142 | 0.032558 | -1.11234 |
| ILMN_1760714 | 0.070499 | 13.40672 | 3.933565 | 0.000258 | 0.014038 | 0.264768 |
| ILMN_1775742 | 0.07043  | 6.149598 | 3.308378 | 0.001743 | 0.042537 | -1.5007  |
| ILMN_1756220 | 0.070272 | 9.88412  | 3.919346 | 0.00027  | 0.014439 | 0.222763 |
| ILMN_1696503 | 0.070166 | 5.995005 | 3.341055 | 0.001584 | 0.040178 | -1.41292 |
| ILMN_3238797 | 0.070108 | 6.616323 | 3.988046 | 0.000217 | 0.012683 | 0.426422 |
| ILMN_1700628 | 0.070023 | 8.914394 | 3.496834 | 0.000997 | 0.03026  | -0.98721 |
| ILMN_3237241 | -0.0699  | 8.244827 | -3.67852 | 0.000573 | 0.022063 | -0.4763  |
| ILMN_1712639 | -0.06987 | 5.972284 | -3.6175  | 0.000691 | 0.024553 | -0.64955 |
| ILMN_3235477 | 0.069853 | 7.23899  | 3.310182 | 0.001734 | 0.042424 | -1.49586 |
| ILMN_1766010 | 0.069786 | 9.713606 | 3.406058 | 0.001307 | 0.0354   | -1.23672 |
| ILMN_1761722 | -0.06965 | 6.721795 | -3.43633 | 0.001195 | 0.033496 | -1.15394 |
| ILMN_1737205 | 0.069609 | 10.47446 | 3.328387 | 0.001644 | 0.040977 | -1.44701 |
| ILMN_2396947 | 0.069554 | 6.802564 | 3.312092 | 0.001724 | 0.042307 | -1.49075 |
| ILMN_2095133 | -0.06951 | 8.352404 | -4.01346 | 0.0002   | 0.01204  | 0.50221  |
| ILMN_1769503 | 0.06949  | 5.950628 | 4.165079 | 0.000123 | 0.008545 | 0.959216 |
| ILMN_1755710 | -0.06945 | 6.44396  | -3.58004 | 0.000775 | 0.025861 | -0.75508 |
| ILMN_3276859 | 0.06936  | 6.856227 | 3.36189  | 0.00149  | 0.038554 | -1.35667 |
| ILMN_1734895 | 0.069347 | 10.45557 | 3.969444 | 0.00023  | 0.013128 | 0.371101 |
| ILMN_1713732 | -0.06931 | 7.408825 | -3.56285 | 0.000816 | 0.02668  | -0.80331 |
| ILMN_2407168 | -0.0692  | 9.364091 | -3.24467 | 0.002098 | 0.048112 | -1.67024 |
| ILMN_1774427 | -0.06903 | 6.664536 | -3.31107 | 0.001729 | 0.042373 | -1.49347 |
| ILMN_2400583 | -0.06898 | 6.221054 | -3.69094 | 0.000552 | 0.021556 | -0.44086 |
| ILMN_1722798 | -0.06897 | 6.920934 | -3.57944 | 0.000776 | 0.025861 | -0.75678 |
| ILMN_3240365 | -0.06896 | 6.127374 | -3.48836 | 0.001022 | 0.030581 | -1.01066 |
| ILMN_1662232 | -0.06891 | 10.57958 | -3.61523 | 0.000696 | 0.024558 | -0.65598 |
| ILMN_2414366 | 0.06864  | 6.52836  | 4.147882 | 0.00013  | 0.008928 | 0.906976 |
| ILMN_1740197 | -0.06863 | 6.46239  | -3.8535  | 0.000332 | 0.016239 | 0.029292 |
| ILMN_1700549 | 0.068579 | 6.885617 | 3.923691 | 0.000266 | 0.014374 | 0.235592 |
| ILMN_1757956 | -0.06847 | 7.737848 | -3.22631 | 0.002212 | 0.049948 | -1.71873 |
| ILMN_1677953 | 0.068394 | 8.517315 | 3.228722 | 0.002197 | 0.049732 | -1.71238 |
| ILMN_1733511 | -0.06836 | 9.79902  | -3.58231 | 0.00077  | 0.025798 | -0.74872 |
| ILMN_3251567 | -0.0683  | 6.775704 | -3.51746 | 0.000937 | 0.029134 | -0.92996 |
| ILMN_1660186 | -0.06827 | 8.751922 | -3.44386 | 0.001168 | 0.033144 | -1.13328 |
| ILMN_1686668 | 0.068208 | 7.342006 | 4.232814 | 9.84E-05 | 0.00731  | 1.165949 |
| ILMN_1706571 | -0.06811 | 6.719259 | -3.3518  | 0.001534 | 0.039392 | -1.38394 |
| ILMN_1693559 | -0.06805 | 6.12679  | -3.73697 | 0.000478 | 0.019733 | -0.30884 |
| ILMN_3249963 | 0.068032 | 6.239203 | 3.490496 | 0.001016 | 0.030533 | -1.00476 |
| ILMN_1724009 | 0.068014 | 7.799939 | 3.790907 | 0.000405 | 0.018066 | -0.15304 |
| ILMN_1755235 | 0.068013 | 8.331261 | 3.899223 | 0.000288 | 0.015035 | 0.163454 |
| ILMN_1746368 | -0.06797 | 7.297648 | -4.05503 | 0.000175 | 0.010898 | 0.626681 |
| ILMN_1752027 | -0.06787 | 7.845224 | -3.32551 | 0.001658 | 0.041235 | -1.45475 |
| ILMN_1748481 | 0.067857 | 7.970756 | 3.743123 | 0.000469 | 0.019597 | -0.29114 |
| ILMN_2415949 | -0.0678  | 8.011595 | -3.56137 | 0.00082  | 0.026726 | -0.80746 |
| ILMN_2182198 | 0.067751 | 9.117461 | 3.960582 | 0.000237 | 0.01328  | 0.344791 |
| ILMN_1678546 | -0.06772 | 9.135787 | -3.78208 | 0.000416 | 0.018352 | -0.17862 |
| ILMN_1805992 | -0.06768 | 9.205907 | -3.90573 | 0.000282 | 0.014802 | 0.182629 |
| ILMN_1694486 | 0.067608 | 6.609586 | 3.911816 | 0.000277 | 0.014692 | 0.200552 |
| ILMN_1651504 | -0.06758 | 7.020903 | -3.51676 | 0.000939 | 0.02914  | -0.93191 |
| ILMN_1722953 | -0.0675  | 6.095272 | -3.72586 | 0.000495 | 0.020207 | -0.3408  |
| ILMN_1770978 | 0.067482 | 5.619437 | 3.227474 | 0.002205 | 0.049867 | -1.71566 |
| ILMN_1880012 | -0.06734 | 6.180205 | -4.02192 | 0.000195 | 0.011925 | 0.527483 |

|              |          |          |          |          |          |          |
|--------------|----------|----------|----------|----------|----------|----------|
| ILMN_2387599 | -0.06725 | 11.77284 | -3.28037 | 0.001891 | 0.044909 | -1.5755  |
| ILMN_2285112 | -0.06724 | 9.45944  | -3.76572 | 0.000438 | 0.018882 | -0.22597 |
| ILMN_1702124 | -0.06722 | 8.13866  | -4.21817 | 0.000103 | 0.007459 | 1.121123 |
| ILMN_1875342 | -0.06722 | 7.489629 | -4.26255 | 8.92E-05 | 0.007073 | 1.257193 |
| ILMN_1669635 | 0.067171 | 9.458683 | 4.201346 | 0.000109 | 0.007798 | 1.069713 |
| ILMN_1800958 | 0.066951 | 9.531794 | 3.97515  | 0.000226 | 0.013051 | 0.388056 |
| ILMN_1787477 | 0.066855 | 6.784701 | 3.519178 | 0.000932 | 0.02902  | -0.92519 |
| ILMN_1736863 | -0.06672 | 5.676027 | -3.54181 | 0.00087  | 0.02778  | -0.86214 |
| ILMN_1670796 | 0.066715 | 9.651498 | 3.921822 | 0.000268 | 0.014389 | 0.230073 |
| ILMN_2322935 | 0.066679 | 8.922015 | 3.851064 | 0.000335 | 0.016288 | 0.022156 |
| ILMN_1742922 | 0.066633 | 8.151503 | 3.68717  | 0.000558 | 0.02172  | -0.45163 |
| ILMN_2298511 | 0.06663  | 8.457234 | 3.438549 | 0.001187 | 0.033343 | -1.14787 |
| ILMN_1678268 | -0.06659 | 7.226246 | -3.96163 | 0.000236 | 0.01326  | 0.347898 |
| ILMN_3241985 | 0.066558 | 6.365159 | 3.784659 | 0.000413 | 0.018281 | -0.17115 |
| ILMN_1665065 | -0.06653 | 6.807666 | -3.77027 | 0.000431 | 0.018733 | -0.2128  |
| ILMN_1792489 | 0.066525 | 12.35525 | 4.008216 | 0.000203 | 0.01218  | 0.486554 |
| ILMN_1809086 | -0.06652 | 7.998576 | -3.79433 | 0.0004   | 0.01801  | -0.14311 |
| ILMN_1767541 | 0.066478 | 6.062374 | 3.810671 | 0.00038  | 0.017435 | -0.09565 |
| ILMN_1669772 | -0.06646 | 5.496418 | -4.31398 | 7.54E-05 | 0.006438 | 1.41566  |
| ILMN_1750178 | -0.06644 | 7.241327 | -3.67758 | 0.000575 | 0.022073 | -0.47899 |
| ILMN_1773148 | -0.0663  | 6.855625 | -3.35731 | 0.00151  | 0.038903 | -1.36906 |
| ILMN_2402806 | -0.06626 | 8.329239 | -3.24758 | 0.00208  | 0.047878 | -1.66255 |
| ILMN_1687546 | -0.06626 | 6.590849 | -3.33123 | 0.00163  | 0.040776 | -1.43937 |
| ILMN_2407308 | -0.0662  | 6.087804 | -3.71324 | 0.000515 | 0.020766 | -0.37702 |
| ILMN_1713875 | 0.066194 | 6.984571 | 3.314247 | 0.001713 | 0.042131 | -1.48497 |
| ILMN_1674128 | 0.066169 | 7.295817 | 4.083939 | 0.00016  | 0.010205 | 0.713632 |
| ILMN_1789732 | -0.06612 | 7.190357 | -3.80275 | 0.00039  | 0.017731 | -0.11867 |
| ILMN_1770732 | 0.066019 | 10.41735 | 3.259167 | 0.002012 | 0.046877 | -1.63186 |
| ILMN_1738819 | 0.065922 | 9.110635 | 3.469998 | 0.00108  | 0.031455 | -1.06138 |
| ILMN_3248575 | 0.065908 | 6.366202 | 4.380921 | 6.04E-05 | 0.005614 | 1.623154 |
| ILMN_1745954 | 0.065766 | 9.440604 | 3.529841 | 0.000902 | 0.028408 | -0.89551 |
| ILMN_3188099 | 0.065714 | 7.34998  | 3.863033 | 0.000323 | 0.01604  | 0.057186 |
| ILMN_2046024 | 0.065683 | 7.334315 | 3.916187 | 0.000273 | 0.014527 | 0.213442 |
| ILMN_1744914 | 0.065605 | 7.926975 | 3.690574 | 0.000552 | 0.021556 | -0.4419  |
| ILMN_1795893 | -0.06557 | 7.453639 | -4.14633 | 0.00013  | 0.00893  | 0.902257 |
| ILMN_1736340 | -0.06557 | 8.446269 | -4.08618 | 0.000158 | 0.010162 | 0.72038  |
| ILMN_1659156 | 0.065536 | 6.381475 | 4.229499 | 9.95E-05 | 0.007326 | 1.155795 |
| ILMN_1665554 | -0.06547 | 6.731716 | -3.48731 | 0.001026 | 0.030581 | -1.01358 |
| ILMN_2163790 | -0.06546 | 5.714307 | -3.30814 | 0.001744 | 0.042537 | -1.50134 |
| ILMN_2069821 | 0.065419 | 6.303886 | 3.88202  | 0.000304 | 0.015453 | 0.112876 |
| ILMN_1779184 | 0.065413 | 6.575723 | 4.06933  | 0.000167 | 0.01058  | 0.669659 |
| ILMN_1700896 | 0.065364 | 8.699259 | 3.769369 | 0.000433 | 0.018762 | -0.21541 |
| ILMN_1740165 | -0.06524 | 7.584426 | -3.3791  | 0.001416 | 0.03726  | -1.31006 |
| ILMN_1691333 | -0.06519 | 6.389422 | -3.63152 | 0.000662 | 0.02392  | -0.60989 |
| ILMN_1799488 | -0.06498 | 6.664421 | -3.59818 | 0.000733 | 0.025232 | -0.70407 |
| ILMN_1663493 | 0.064712 | 7.638221 | 3.294173 | 0.001817 | 0.043802 | -1.53868 |
| ILMN_1698365 | 0.064513 | 5.905556 | 3.507773 | 0.000964 | 0.029554 | -0.95687 |
| ILMN_1810474 | 0.064498 | 10.47726 | 3.70732  | 0.000525 | 0.020981 | -0.39399 |
| ILMN_2369682 | 0.064426 | 12.64903 | 3.854843 | 0.000331 | 0.016239 | 0.033209 |
| ILMN_2231020 | 0.064348 | 8.699813 | 3.269324 | 0.001953 | 0.04609  | -1.60489 |
| ILMN_2139827 | 0.064279 | 6.49442  | 3.320888 | 0.00168  | 0.04148  | -1.46715 |
| ILMN_1666332 | -0.06426 | 6.90698  | -3.33724 | 0.001602 | 0.040464 | -1.42319 |
| ILMN_2319544 | 0.064242 | 6.139729 | 3.463722 | 0.001101 | 0.031813 | -1.07868 |
| ILMN_1654598 | -0.06423 | 6.784462 | -3.73085 | 0.000488 | 0.019993 | -0.32647 |

|              |          |          |          |          |          |          |
|--------------|----------|----------|----------|----------|----------|----------|
| ILMN_1747162 | 0.064149 | 9.333039 | 3.329654 | 0.001638 | 0.040884 | -1.4436  |
| ILMN_1665601 | 0.064001 | 7.153769 | 3.683017 | 0.000565 | 0.021901 | -0.46348 |
| ILMN_1774281 | 0.063911 | 6.209842 | 3.804382 | 0.000388 | 0.017711 | -0.11392 |
| ILMN_1670377 | -0.06375 | 6.558711 | -3.34428 | 0.001569 | 0.039976 | -1.40423 |
| ILMN_1791896 | 0.06369  | 9.982601 | 3.420645 | 0.001252 | 0.034412 | -1.19689 |
| ILMN_1714461 | -0.06369 | 8.581909 | -3.58855 | 0.000755 | 0.025654 | -0.73117 |
| ILMN_1764398 | 0.063515 | 6.95288  | 4.115434 | 0.000144 | 0.009592 | 0.808682 |
| ILMN_1695917 | -0.06342 | 9.13386  | -3.5658  | 0.000809 | 0.026563 | -0.79505 |
| ILMN_1785177 | 0.063391 | 7.1096   | 3.292554 | 0.001825 | 0.043917 | -1.54301 |
| ILMN_1791302 | 0.063347 | 5.413727 | 4.132604 | 0.000136 | 0.009198 | 0.860651 |
| ILMN_1689720 | 0.063267 | 6.837395 | 3.402436 | 0.001321 | 0.035549 | -1.24659 |
| ILMN_1658830 | -0.06324 | 7.297197 | -3.34922 | 0.001546 | 0.039545 | -1.39091 |
| ILMN_1787308 | -0.0632  | 7.499074 | -3.35696 | 0.001511 | 0.038913 | -1.37    |
| ILMN_1741564 | -0.0632  | 8.096878 | -3.54332 | 0.000866 | 0.027705 | -0.85793 |
| ILMN_1709162 | 0.063189 | 6.238882 | 3.590109 | 0.000752 | 0.025581 | -0.72679 |
| ILMN_1788377 | -0.06318 | 5.678743 | -3.43235 | 0.001209 | 0.033515 | -1.16486 |
| ILMN_1699082 | 0.062966 | 7.642711 | 3.961959 | 0.000236 | 0.01326  | 0.348878 |
| ILMN_3188196 | 0.062908 | 5.65451  | 3.255248 | 0.002035 | 0.047268 | -1.64225 |
| ILMN_1679731 | 0.062822 | 7.707593 | 3.823294 | 0.000366 | 0.017054 | -0.0589  |
| ILMN_2090786 | 0.062746 | 6.199522 | 3.548545 | 0.000853 | 0.027472 | -0.84333 |
| ILMN_3262936 | 0.062673 | 7.718663 | 3.832143 | 0.000356 | 0.01681  | -0.03311 |
| ILMN_1670532 | 0.062658 | 7.726652 | 3.513801 | 0.000947 | 0.029309 | -0.94013 |
| ILMN_1776347 | 0.062628 | 11.11013 | 3.591046 | 0.000749 | 0.025581 | -0.72415 |
| ILMN_1720838 | -0.06259 | 10.69731 | -3.45741 | 0.001122 | 0.032173 | -1.09605 |
| ILMN_1673944 | -0.06213 | 10.05075 | -3.63269 | 0.00066  | 0.02392  | -0.60658 |
| ILMN_1781099 | -0.06211 | 8.614731 | -3.46597 | 0.001093 | 0.031729 | -1.07248 |
| ILMN_1670440 | 0.061995 | 5.638456 | 3.609197 | 0.000709 | 0.024854 | -0.67301 |
| ILMN_1705266 | 0.061939 | 7.110534 | 3.636466 | 0.000652 | 0.023869 | -0.59589 |
| ILMN_1805606 | -0.06186 | 6.257124 | -3.51159 | 0.000953 | 0.029425 | -0.94628 |
| ILMN_1750511 | 0.061781 | 7.313128 | 3.434558 | 0.001201 | 0.033496 | -1.15881 |
| ILMN_1667260 | 0.061702 | 8.447507 | 3.299543 | 0.001789 | 0.043394 | -1.52433 |
| ILMN_1667580 | 0.061651 | 6.044111 | 3.469596 | 0.001082 | 0.031466 | -1.06249 |
| ILMN_1787541 | -0.06164 | 6.610779 | -3.23057 | 0.002185 | 0.049532 | -1.70749 |
| ILMN_1814589 | 0.061504 | 7.199963 | 3.403528 | 0.001317 | 0.035527 | -1.24361 |
| ILMN_2230672 | 0.061464 | 10.81509 | 4.241311 | 9.57E-05 | 0.007252 | 1.191988 |
| ILMN_2075892 | 0.061406 | 5.774836 | 3.616828 | 0.000693 | 0.024558 | -0.65146 |
| ILMN_1817545 | -0.06114 | 6.080008 | -3.37456 | 0.001435 | 0.037591 | -1.32237 |
| ILMN_1730660 | -0.06106 | 6.511666 | -3.60644 | 0.000715 | 0.024876 | -0.68078 |
| ILMN_1830985 | -0.06098 | 5.98513  | -3.26616 | 0.001971 | 0.046388 | -1.61329 |
| ILMN_1700238 | -0.06096 | 6.866117 | -3.29526 | 0.001811 | 0.04375  | -1.53577 |
| ILMN_2372698 | -0.06093 | 6.023205 | -3.64363 | 0.000638 | 0.023582 | -0.57559 |
| ILMN_3248057 | -0.06093 | 6.076667 | -4.69511 | 2.11E-05 | 0.002859 | 2.614286 |
| ILMN_1744147 | 0.06092  | 10.12962 | 3.558384 | 0.000828 | 0.026893 | -0.81581 |
| ILMN_1739164 | 0.060837 | 5.841739 | 3.640808 | 0.000644 | 0.023685 | -0.58358 |
| ILMN_2357382 | 0.060778 | 6.740875 | 3.538402 | 0.000879 | 0.027964 | -0.87165 |
| ILMN_1737413 | 0.060707 | 7.554731 | 3.235142 | 0.002157 | 0.049076 | -1.69544 |
| ILMN_3203098 | 0.060493 | 6.27157  | 3.56542  | 0.00081  | 0.026563 | -0.79611 |
| ILMN_2038772 | -0.06038 | 11.82935 | -3.5371  | 0.000883 | 0.028023 | -0.87528 |
| ILMN_1813641 | -0.06028 | 7.114735 | -3.26189 | 0.001996 | 0.046713 | -1.62464 |
| ILMN_1674658 | 0.06016  | 5.345732 | 3.40227  | 0.001322 | 0.035549 | -1.24704 |
| ILMN_2354649 | 0.060028 | 7.613953 | 3.801668 | 0.000391 | 0.017767 | -0.12181 |
| ILMN_1675542 | 0.05991  | 9.312797 | 3.514212 | 0.000946 | 0.029299 | -0.93899 |
| ILMN_1656378 | 0.059787 | 7.057486 | 3.34782  | 0.001553 | 0.039678 | -1.39468 |
| ILMN_1750092 | -0.0597  | 6.27336  | -3.41801 | 0.001262 | 0.034602 | -1.2041  |

|              |          |          |          |          |          |          |
|--------------|----------|----------|----------|----------|----------|----------|
| ILMN_3242638 | 0.059596 | 6.533512 | 3.669249 | 0.00059  | 0.022452 | -0.50274 |
| ILMN_1672390 | 0.059505 | 6.340332 | 3.618653 | 0.000689 | 0.024533 | -0.6463  |
| ILMN_3234735 | 0.059402 | 6.842951 | 4.158921 | 0.000125 | 0.008701 | 0.940497 |
| ILMN_1674908 | -0.05909 | 6.39054  | -3.65721 | 0.000612 | 0.022963 | -0.537   |
| ILMN_1786426 | 0.059071 | 6.398607 | 3.572366 | 0.000793 | 0.02627  | -0.77663 |
| ILMN_1756352 | -0.05902 | 8.736713 | -3.61498 | 0.000697 | 0.024558 | -0.65667 |
| ILMN_1668408 | 0.059008 | 6.832079 | 3.435293 | 0.001198 | 0.033496 | -1.15679 |
| ILMN_1747629 | 0.058983 | 5.737485 | 3.383939 | 0.001396 | 0.036814 | -1.29691 |
| ILMN_1837298 | 0.058946 | 6.160308 | 3.534183 | 0.000891 | 0.028141 | -0.88341 |
| ILMN_1679782 | -0.05892 | 6.257648 | -3.95873 | 0.000238 | 0.013337 | 0.33929  |
| ILMN_2377733 | 0.05887  | 6.007639 | 3.362009 | 0.001489 | 0.038554 | -1.35635 |
| ILMN_3239162 | -0.05884 | 5.864807 | -3.32469 | 0.001662 | 0.041274 | -1.45693 |
| ILMN_1688753 | 0.058734 | 10.48571 | 3.456392 | 0.001125 | 0.032201 | -1.09885 |
| ILMN_1737144 | 0.058718 | 5.966924 | 3.98237  | 0.000221 | 0.012893 | 0.40953  |
| ILMN_1785107 | 0.058678 | 7.490235 | 3.523131 | 0.000921 | 0.02878  | -0.91419 |
| ILMN_3247222 | 0.058449 | 5.894238 | 3.441937 | 0.001175 | 0.03317  | -1.13857 |
| ILMN_1776147 | 0.058319 | 8.433    | 3.717791 | 0.000508 | 0.020572 | -0.36396 |
| ILMN_1721337 | 0.058212 | 7.576043 | 3.784639 | 0.000413 | 0.018281 | -0.17121 |
| ILMN_1742962 | 0.058205 | 6.073157 | 3.405197 | 0.00131  | 0.035435 | -1.23906 |
| ILMN_1899940 | 0.058004 | 6.250459 | 3.591477 | 0.000748 | 0.025573 | -0.72294 |
| ILMN_1759789 | 0.057898 | 6.664458 | 3.341057 | 0.001584 | 0.040178 | -1.41291 |
| ILMN_1761474 | 0.057796 | 7.49856  | 3.58215  | 0.00077  | 0.025798 | -0.74916 |
| ILMN_1811301 | -0.05768 | 7.229325 | -3.40541 | 0.00131  | 0.035435 | -1.23847 |
| ILMN_2255310 | 0.057612 | 11.02611 | 3.819959 | 0.000369 | 0.017174 | -0.06862 |
| ILMN_3246944 | 0.057554 | 6.035575 | 3.665058 | 0.000598 | 0.022588 | -0.51468 |
| ILMN_3248562 | 0.057426 | 6.903549 | 3.459268 | 0.001115 | 0.032048 | -1.09094 |
| ILMN_1836218 | 0.057407 | 7.240125 | 3.357336 | 0.00151  | 0.038903 | -1.36898 |
| ILMN_1743131 | -0.05733 | 7.581142 | -3.68259 | 0.000566 | 0.021905 | -0.4647  |
| ILMN_1746893 | 0.057004 | 6.199842 | 3.305168 | 0.001759 | 0.042807 | -1.50929 |
| ILMN_3309754 | -0.05694 | 5.824769 | -3.29326 | 0.001822 | 0.043875 | -1.54113 |
| ILMN_1680403 | -0.05694 | 10.4819  | -3.23572 | 0.002153 | 0.049059 | -1.69391 |
| ILMN_1739876 | -0.05694 | 9.891474 | -3.59945 | 0.00073  | 0.025207 | -0.70048 |
| ILMN_1809883 | 0.05694  | 5.617203 | 3.793456 | 0.000401 | 0.018016 | -0.14565 |
| ILMN_1761721 | 0.056727 | 10.42    | 3.290282 | 0.001838 | 0.044148 | -1.54907 |
| ILMN_1737805 | 0.056591 | 5.529744 | 3.250966 | 0.00206  | 0.047634 | -1.65359 |
| ILMN_1676159 | 0.056459 | 9.37641  | 3.465393 | 0.001095 | 0.031757 | -1.07407 |
| ILMN_2105573 | 0.056319 | 6.023866 | 3.548289 | 0.000853 | 0.027472 | -0.84404 |
| ILMN_1748607 | 0.055987 | 5.781067 | 3.910426 | 0.000278 | 0.014712 | 0.196453 |
| ILMN_1693843 | 0.055789 | 5.993364 | 3.760444 | 0.000445 | 0.019051 | -0.24119 |
| ILMN_1724504 | 0.055783 | 9.781237 | 3.566191 | 0.000808 | 0.026563 | -0.79395 |
| ILMN_3309869 | 0.05471  | 5.800399 | 3.860619 | 0.000325 | 0.016125 | 0.050115 |
| ILMN_1771815 | -0.05455 | 10.19336 | -3.32116 | 0.001679 | 0.04148  | -1.46642 |
| ILMN_2395092 | 0.054458 | 5.953096 | 3.570663 | 0.000797 | 0.026314 | -0.78141 |
| ILMN_1654365 | 0.054374 | 5.770407 | 3.668802 | 0.000591 | 0.022452 | -0.50402 |
| ILMN_2247296 | -0.05434 | 5.921464 | -4.24445 | 9.47E-05 | 0.007245 | 1.201616 |
| ILMN_1873261 | -0.05433 | 5.92997  | -3.30795 | 0.001745 | 0.042537 | -1.50183 |
| ILMN_1701940 | -0.05432 | 7.001941 | -3.26515 | 0.001977 | 0.046399 | -1.61599 |
| ILMN_1703949 | 0.054319 | 11.56885 | 3.254818 | 0.002037 | 0.047295 | -1.64339 |
| ILMN_1656427 | -0.05427 | 6.98163  | -3.41742 | 0.001264 | 0.034633 | -1.2057  |
| ILMN_1810608 | 0.054159 | 6.838954 | 3.437756 | 0.00119  | 0.033395 | -1.15004 |
| ILMN_1801905 | -0.05416 | 6.675453 | -3.25844 | 0.002016 | 0.046928 | -1.63379 |
| ILMN_1655052 | 0.054124 | 6.102045 | 3.365268 | 0.001475 | 0.038315 | -1.34753 |
| ILMN_3298462 | 0.053894 | 5.557262 | 4.237946 | 9.67E-05 | 0.007301 | 1.181674 |
| ILMN_2173740 | -0.05387 | 7.362773 | -3.2411  | 0.00212  | 0.048485 | -1.67968 |

|              |          |          |          |          |          |          |
|--------------|----------|----------|----------|----------|----------|----------|
| ILMN_1738497 | -0.0538  | 5.905921 | -3.44157 | 0.001176 | 0.03317  | -1.13958 |
| ILMN_1765532 | 0.053798 | 7.495265 | 3.326105 | 0.001655 | 0.041192 | -1.45314 |
| ILMN_1749212 | -0.05379 | 7.075685 | -3.42347 | 0.001241 | 0.034179 | -1.18918 |
| ILMN_1806122 | -0.05369 | 8.218411 | -3.26197 | 0.001995 | 0.046713 | -1.62441 |
| ILMN_1738656 | 0.053567 | 9.319114 | 4.344388 | 6.82E-05 | 0.006106 | 1.50974  |
| ILMN_3310401 | -0.05348 | 5.717793 | -3.4778  | 0.001055 | 0.031069 | -1.03985 |
| ILMN_2308689 | 0.053456 | 7.681956 | 3.341467 | 0.001582 | 0.040178 | -1.41181 |
| ILMN_2049642 | 0.053413 | 10.4411  | 3.793976 | 0.000401 | 0.01801  | -0.14414 |
| ILMN_1680682 | 0.053383 | 6.391218 | 3.503379 | 0.000977 | 0.029815 | -0.96907 |
| ILMN_3240117 | -0.05315 | 10.03713 | -3.87388 | 0.000312 | 0.015707 | 0.088973 |
| ILMN_1719857 | -0.05309 | 5.749521 | -3.24832 | 0.002076 | 0.04784  | -1.6606  |
| ILMN_1808132 | 0.052797 | 6.072595 | 3.704148 | 0.00053  | 0.021039 | -0.40307 |
| ILMN_1739454 | 0.052762 | 7.317376 | 3.938978 | 0.000254 | 0.013842 | 0.28078  |
| ILMN_1755911 | 0.052438 | 6.392163 | 4.003544 | 0.000207 | 0.012278 | 0.472613 |
| ILMN_2221336 | 0.051708 | 6.184475 | 3.607915 | 0.000712 | 0.024854 | -0.67662 |
| ILMN_2187746 | 0.051644 | 6.165204 | 3.36806  | 0.001463 | 0.038145 | -1.33997 |
| ILMN_2044645 | -0.05159 | 6.215112 | -3.37913 | 0.001416 | 0.03726  | -1.30996 |
| ILMN_1663024 | 0.051512 | 5.277935 | 4.388275 | 5.90E-05 | 0.005509 | 1.646034 |
| ILMN_2065299 | -0.05151 | 7.599916 | -3.27362 | 0.001929 | 0.045612 | -1.59347 |
| ILMN_2311873 | -0.05126 | 5.907227 | -3.58319 | 0.000768 | 0.025767 | -0.74625 |
| ILMN_1907966 | 0.051222 | 6.077735 | 3.613084 | 0.000701 | 0.024636 | -0.66203 |
| ILMN_1656327 | -0.05113 | 5.591198 | -3.43496 | 0.001199 | 0.033496 | -1.1577  |
| ILMN_1757825 | -0.05106 | 5.640296 | -3.31474 | 0.001711 | 0.042101 | -1.48366 |
| ILMN_1683798 | 0.051004 | 6.135779 | 3.837325 | 0.00035  | 0.016658 | -0.01799 |
| ILMN_1861270 | -0.05097 | 6.065112 | -3.40706 | 0.001303 | 0.03535  | -1.23399 |
| ILMN_2048477 | -0.05061 | 5.872809 | -3.25684 | 0.002025 | 0.047115 | -1.63804 |
| ILMN_1801572 | -0.05051 | 5.635066 | -3.87846 | 0.000307 | 0.015581 | 0.102431 |
| ILMN_1766247 | 0.049839 | 6.790934 | 3.477519 | 0.001056 | 0.031069 | -1.04063 |
| ILMN_1714527 | -0.04968 | 9.882828 | -3.42876 | 0.001222 | 0.033786 | -1.17469 |
| ILMN_1794987 | 0.049666 | 6.293463 | 3.48748  | 0.001025 | 0.030581 | -1.0131  |
| ILMN_2415572 | -0.0494  | 5.916209 | -3.38746 | 0.001381 | 0.036517 | -1.28734 |
| ILMN_1777060 | 0.049396 | 6.197064 | 3.493753 | 0.001006 | 0.030395 | -0.99574 |
| ILMN_1662021 | 0.049054 | 6.452101 | 3.38989  | 0.001371 | 0.036422 | -1.28074 |
| ILMN_2261099 | 0.048482 | 5.366453 | 3.412996 | 0.00128  | 0.034925 | -1.21779 |
| ILMN_1776325 | -0.04844 | 7.337166 | -3.43524 | 0.001198 | 0.033496 | -1.15693 |
| ILMN_3248069 | -0.04828 | 13.81881 | -3.51549 | 0.000942 | 0.029212 | -0.93544 |
| ILMN_3235148 | 0.048138 | 12.98194 | 3.29506  | 0.001812 | 0.04375  | -1.53631 |
| ILMN_1748407 | 0.048123 | 6.545728 | 3.332647 | 0.001623 | 0.040674 | -1.43556 |
| ILMN_1802766 | 0.048106 | 6.196487 | 3.496112 | 0.000999 | 0.03026  | -0.98921 |
| ILMN_1787193 | -0.048   | 5.464581 | -3.39399 | 0.001355 | 0.03607  | -1.26958 |
| ILMN_2395981 | -0.04793 | 6.196733 | -3.45747 | 0.001122 | 0.032173 | -1.0959  |
| ILMN_2382558 | 0.047558 | 6.634568 | 3.421302 | 0.001249 | 0.034372 | -1.19509 |
| ILMN_1680703 | 0.047456 | 10.15744 | 3.564625 | 0.000812 | 0.026563 | -0.79833 |
| ILMN_1651310 | 0.047223 | 5.64281  | 3.354328 | 0.001523 | 0.039187 | -1.37711 |
| ILMN_2144352 | 0.047113 | 6.173444 | 3.282606 | 0.001879 | 0.044661 | -1.56954 |
| ILMN_1730791 | 0.047039 | 6.350792 | 3.48274  | 0.00104  | 0.030849 | -1.0262  |
| ILMN_1750469 | -0.04698 | 5.396838 | -3.3328  | 0.001623 | 0.040674 | -1.43515 |
| ILMN_1677815 | -0.04677 | 5.463739 | -3.28251 | 0.00188  | 0.044661 | -1.5698  |
| ILMN_3263072 | -0.04675 | 5.719879 | -3.29313 | 0.001822 | 0.043875 | -1.54148 |
| ILMN_1670715 | -0.04635 | 5.830224 | -3.29621 | 0.001806 | 0.043695 | -1.53324 |
| ILMN_2388090 | 0.046143 | 5.945175 | 3.509002 | 0.000961 | 0.029523 | -0.95346 |
| ILMN_1791078 | 0.045855 | 5.184899 | 3.259839 | 0.002008 | 0.046877 | -1.63007 |
| ILMN_2163723 | 0.045843 | 5.592985 | 3.407223 | 0.001303 | 0.03535  | -1.23354 |
| ILMN_1697512 | -0.04549 | 5.89182  | -3.30871 | 0.001741 | 0.042537 | -1.49981 |

|              |          |          |          |          |          |          |
|--------------|----------|----------|----------|----------|----------|----------|
| ILMN_1694414 | 0.04496  | 5.429101 | 3.401469 | 0.001325 | 0.035568 | -1.24922 |
| ILMN_1712530 | 0.044705 | 8.099304 | 3.401023 | 0.001327 | 0.035569 | -1.25044 |
| ILMN_1737498 | 0.044274 | 6.296438 | 3.360911 | 0.001494 | 0.038607 | -1.35932 |
| ILMN_2049672 | -0.0441  | 5.240343 | -3.60686 | 0.000714 | 0.024876 | -0.6796  |
| ILMN_2408764 | -0.04356 | 5.412849 | -3.60787 | 0.000712 | 0.024854 | -0.67676 |
| ILMN_1840894 | 0.043502 | 6.436331 | 3.243958 | 0.002102 | 0.048158 | -1.67214 |
| ILMN_1767433 | 0.042732 | 6.231968 | 3.259041 | 0.002012 | 0.046877 | -1.63219 |
| ILMN_1827968 | -0.04266 | 6.000498 | -3.77051 | 0.000431 | 0.018733 | -0.2121  |
| ILMN_1765729 | 0.042419 | 6.196997 | 3.284876 | 0.001867 | 0.044569 | -1.56349 |
| ILMN_1887128 | 0.042084 | 6.128285 | 3.345266 | 0.001564 | 0.03991  | -1.40157 |
| ILMN_1748141 | 0.042007 | 6.114728 | 3.28873  | 0.001846 | 0.044255 | -1.55321 |
| ILMN_1788625 | 0.041414 | 6.60099  | 3.290554 | 0.001836 | 0.044143 | -1.54834 |
| ILMN_1817251 | 0.041404 | 5.987984 | 3.442482 | 0.001173 | 0.033169 | -1.13708 |
| ILMN_1706758 | -0.04137 | 5.513889 | -3.44413 | 0.001167 | 0.033144 | -1.13256 |
| ILMN_2163187 | 0.040297 | 5.70899  | 3.472954 | 0.001071 | 0.03123  | -1.05323 |
| ILMN_1736234 | 0.039261 | 8.677606 | 3.489328 | 0.001019 | 0.030581 | -1.00799 |
| ILMN_1766565 | -0.03923 | 5.405056 | -3.39722 | 0.001342 | 0.035945 | -1.26079 |
| ILMN_3265439 | -0.03847 | 5.761817 | -3.40664 | 0.001305 | 0.035367 | -1.23513 |
| ILMN_3246292 | 0.035704 | 13.61235 | 3.402413 | 0.001321 | 0.035549 | -1.24665 |

**Supplementary Table S3. Genes showing significant concentration-dependent associations with levels of HPV16 E6 protein in the W12 clones, after exclusion of known p53 targets.**

|              | logFC    | AveExpr  | t        | P.Value  | adj.P.Val | B        |
|--------------|----------|----------|----------|----------|-----------|----------|
| ILMN_1768176 | -1.03382 | 9.695149 | -8.95765 | 5.63E-12 | 1.94E-07  | 16.72703 |
| ILMN_1762899 | -0.87966 | 11.10572 | -6.27406 | 8.15E-08 | 6.25E-05  | 7.840583 |
| ILMN_1718387 | 0.807518 | 7.067937 | 4.841749 | 1.28E-05 | 0.001949  | 3.122794 |
| ILMN_1743199 | -0.73382 | 8.006812 | -5.5079  | 1.26E-06 | 0.000411  | 5.286692 |
| ILMN_2096372 | 0.704396 | 6.843431 | 5.770864 | 4.94E-07 | 0.000216  | 6.157963 |
| ILMN_1751607 | -0.69388 | 8.653658 | -4.02154 | 0.000195 | 0.012565  | 0.596512 |
| ILMN_1693192 | 0.668337 | 10.53244 | 3.590024 | 0.000752 | 0.030491  | -0.6419  |
| ILMN_2188264 | -0.63646 | 9.77076  | -5.06548 | 5.91E-06 | 0.001252  | 3.841039 |
| ILMN_1795930 | -0.60207 | 8.793098 | -4.89311 | 1.07E-05 | 0.001805  | 3.286776 |
| ILMN_1693338 | 0.59907  | 8.093769 | 4.561861 | 3.30E-05 | 0.003717  | 2.239748 |
| ILMN_1709348 | 0.573429 | 6.659982 | 6.073941 | 1.67E-07 | 0.000101  | 7.16964  |
| ILMN_1801307 | -0.56904 | 7.782393 | -6.39114 | 5.35E-08 | 4.99E-05  | 8.233819 |
| ILMN_1682775 | -0.55521 | 9.613886 | -6.35117 | 6.18E-08 | 5.32E-05  | 8.099527 |
| ILMN_1705750 | 0.547466 | 9.719861 | 4.659485 | 2.38E-05 | 0.003001  | 2.545607 |
| ILMN_1687768 | -0.51624 | 10.72609 | -4.09663 | 0.000153 | 0.010842  | 0.819255 |
| ILMN_1682717 | -0.50735 | 10.41325 | -7.48282 | 1.05E-09 | 6.22E-06  | 11.89755 |
| ILMN_1796316 | 0.50097  | 6.699623 | 3.60312  | 0.000722 | 0.029718  | -0.60545 |
| ILMN_1725338 | -0.48667 | 7.689723 | -5.26734 | 2.93E-06 | 0.000776  | 4.496938 |
| ILMN_2166457 | -0.47841 | 7.79733  | -4.92266 | 9.68E-06 | 0.001702  | 3.381389 |
| ILMN_1810835 | -0.47277 | 11.7065  | -3.40852 | 0.001298 | 0.042085  | -1.13906 |
| ILMN_1718977 | -0.47091 | 8.552016 | -6.83648 | 1.07E-08 | 1.95E-05  | 9.73125  |
| ILMN_1722781 | -0.46471 | 7.165493 | -4.85394 | 1.23E-05 | 0.00192   | 3.16166  |
| ILMN_1744604 | 0.45631  | 7.452409 | 3.464024 | 0.0011   | 0.037789  | -0.98865 |
| ILMN_1737406 | -0.45431 | 10.1444  | -6.67892 | 1.90E-08 | 2.84E-05  | 9.201421 |
| ILMN_1702691 | -0.43746 | 8.552129 | -3.84523 | 0.000341 | 0.018239  | 0.081581 |
| ILMN_3310326 | -0.43645 | 8.573468 | -6.20962 | 1.03E-07 | 7.38E-05  | 7.624351 |
| ILMN_1682636 | -0.41617 | 7.259545 | -4.82506 | 1.35E-05 | 0.00201   | 3.069632 |
| ILMN_1803811 | -0.41345 | 10.1098  | -4.89073 | 1.08E-05 | 0.001808  | 3.279161 |
| ILMN_1791726 | 0.412745 | 7.649643 | 4.950285 | 8.80E-06 | 0.001614  | 3.469978 |
| ILMN_1756417 | -0.41226 | 8.04264  | -6.432   | 4.62E-08 | 4.55E-05  | 8.371157 |
| ILMN_1730223 | -0.40347 | 8.039239 | -5.23925 | 3.23E-06 | 0.000815  | 4.40528  |
| ILMN_2150851 | -0.39394 | 11.4861  | -3.98027 | 0.000222 | 0.013772  | 0.474933 |
| ILMN_2372082 | -0.39154 | 6.926074 | -4.68676 | 2.17E-05 | 0.002838  | 2.631475 |
| ILMN_2401873 | -0.38456 | 8.387228 | -7.0614  | 4.78E-09 | 1.50E-05  | 10.48682 |
| ILMN_2407389 | -0.384   | 8.461271 | -3.79291 | 0.000402 | 0.020087  | -0.06896 |
| ILMN_2197365 | -0.37526 | 11.64348 | -3.9879  | 0.000217 | 0.013562  | 0.497356 |
| ILMN_1687978 | -0.3748  | 9.9823   | -4.05453 | 0.000175 | 0.011904  | 0.694121 |
| ILMN_1692056 | 0.374319 | 7.887779 | 3.323063 | 0.00167  | 0.048443  | -1.36774 |
| ILMN_1671891 | 0.372118 | 7.065516 | 6.178178 | 1.15E-07 | 8.09E-05  | 7.518901 |
| ILMN_3236367 | -0.36952 | 9.576271 | -4.43486 | 5.05E-05 | 0.004975  | 1.845619 |
| ILMN_1801205 | -0.36816 | 9.373757 | -3.36587 | 0.001472 | 0.044915  | -1.25363 |
| ILMN_2091375 | -0.36729 | 7.420736 | -6.09985 | 1.52E-07 | 9.55E-05  | 7.256412 |
| ILMN_2150856 | -0.36279 | 12.20645 | -4.226   | 0.000101 | 0.008103  | 1.207578 |
| ILMN_1703123 | -0.36254 | 9.308187 | -4.86858 | 1.17E-05 | 0.001878  | 3.208387 |
| ILMN_2348268 | -0.36098 | 7.610188 | -4.39821 | 5.70E-05 | 0.005463  | 1.732707 |
| ILMN_1728677 | -0.35577 | 6.90659  | -4.31564 | 7.50E-05 | 0.006573  | 1.479802 |
| ILMN_1815023 | -0.35031 | 9.555022 | -6.59904 | 2.53E-08 | 3.23E-05  | 8.93277  |
| ILMN_2401878 | -0.34689 | 8.20921  | -7.28301 | 2.15E-09 | 8.24E-06  | 11.22969 |
| ILMN_2255133 | -0.34159 | 7.332635 | -3.91723 | 0.000272 | 0.015534  | 0.290434 |
| ILMN_1660000 | -0.34137 | 7.522968 | -5.25443 | 3.06E-06 | 0.000792  | 4.454812 |

|              |          |          |          |          |          |          |
|--------------|----------|----------|----------|----------|----------|----------|
| ILMN_1781285 | -0.34061 | 10.96082 | -4.56122 | 3.31E-05 | 0.003717 | 2.237736 |
| ILMN_1685663 | 0.340197 | 5.625189 | 6.886444 | 8.98E-09 | 1.76E-05 | 9.899184 |
| ILMN_1772910 | 0.337649 | 8.398031 | 5.237567 | 3.25E-06 | 0.000815 | 4.399786 |
| ILMN_1735014 | -0.33475 | 11.25498 | -5.38421 | 1.94E-06 | 0.000582 | 4.879647 |
| ILMN_2318643 | -0.33244 | 9.45439  | -5.55689 | 1.06E-06 | 0.000368 | 5.448442 |
| ILMN_2062701 | 0.331769 | 7.849424 | 5.899252 | 3.12E-07 | 0.00015  | 6.585714 |
| ILMN_1781400 | 0.325712 | 6.351035 | 4.663803 | 2.34E-05 | 0.002972 | 2.559191 |
| ILMN_2041190 | -0.3207  | 10.1174  | -6.13422 | 1.35E-07 | 9.11E-05 | 7.371555 |
| ILMN_1745620 | -0.32063 | 8.115913 | -5.10287 | 5.19E-06 | 0.001155 | 3.962017 |
| ILMN_2410145 | -0.31926 | 6.066737 | -3.90337 | 0.000284 | 0.015977 | 0.250072 |
| ILMN_1782305 | -0.3176  | 7.577045 | -3.58188 | 0.000771 | 0.031037 | -0.66453 |
| ILMN_1665510 | -0.31718 | 11.87829 | -5.21583 | 3.50E-06 | 0.000863 | 4.328925 |
| ILMN_1680139 | -0.31587 | 8.145183 | -4.52179 | 3.78E-05 | 0.004096 | 2.114932 |
| ILMN_2318638 | -0.31557 | 10.52254 | -5.0145  | 7.05E-06 | 0.001405 | 3.676507 |
| ILMN_1664922 | 0.310727 | 10.29266 | 4.153402 | 0.000127 | 0.009448 | 0.988979 |
| ILMN_1760990 | 0.310301 | 6.710187 | 4.838381 | 1.29E-05 | 0.001963 | 3.11206  |
| ILMN_1672295 | -0.30925 | 8.098478 | -4.56162 | 3.31E-05 | 0.003717 | 2.238984 |
| ILMN_1669046 | -0.30916 | 10.18236 | -4.91511 | 9.93E-06 | 0.00173  | 3.357196 |
| ILMN_1702127 | 0.30797  | 5.68991  | 6.32169  | 6.87E-08 | 5.64E-05 | 8.000517 |
| ILMN_1800317 | 0.306635 | 6.100468 | 4.539929 | 3.56E-05 | 0.003963 | 2.171373 |
| ILMN_1769201 | -0.30486 | 7.974047 | -3.60744 | 0.000713 | 0.02954  | -0.59341 |
| ILMN_1660067 | -0.30206 | 7.137712 | -4.27108 | 8.68E-05 | 0.007193 | 1.34415  |
| ILMN_2203950 | -0.30157 | 11.32692 | -7.38567 | 1.49E-09 | 7.32E-06 | 11.57312 |
| ILMN_1752899 | -0.30078 | 7.611663 | -4.66345 | 2.34E-05 | 0.002972 | 2.558078 |
| ILMN_1806023 | -0.29735 | 10.0989  | -3.5611  | 0.000821 | 0.032122 | -0.72215 |
| ILMN_2094776 | -0.29494 | 8.956537 | -4.36015 | 6.47E-05 | 0.005918 | 1.615886 |
| ILMN_1700978 | -0.29442 | 6.835207 | -4.38882 | 5.89E-05 | 0.005605 | 1.703833 |
| ILMN_1693341 | -0.28327 | 7.031799 | -4.70825 | 2.01E-05 | 0.002728 | 2.699274 |
| ILMN_1750062 | 0.282182 | 6.425835 | 3.937477 | 0.000255 | 0.015076 | 0.349533 |
| ILMN_2404746 | -0.28108 | 7.008499 | -5.04043 | 6.45E-06 | 0.00133  | 3.760124 |
| ILMN_2396020 | -0.27892 | 10.40616 | -3.37148 | 0.001448 | 0.044612 | -1.23861 |
| ILMN_2241124 | -0.27586 | 7.144788 | -3.6033  | 0.000722 | 0.029718 | -0.60495 |
| ILMN_1769520 | -0.27388 | 8.983307 | -3.53169 | 0.000897 | 0.03384  | -0.80333 |
| ILMN_1683475 | 0.273863 | 10.1368  | 6.880086 | 9.18E-09 | 1.76E-05 | 9.877815 |
| ILMN_2148469 | 0.273003 | 8.810091 | 4.903693 | 1.03E-05 | 0.001773 | 3.32064  |
| ILMN_1680132 | 0.271115 | 6.11318  | 4.746584 | 1.77E-05 | 0.002488 | 2.820471 |
| ILMN_1802205 | -0.27019 | 9.479563 | -4.63939 | 2.54E-05 | 0.003133 | 2.482441 |
| ILMN_1656057 | -0.26939 | 10.21881 | -6.06561 | 1.72E-07 | 0.000102 | 7.14174  |
| ILMN_1683129 | -0.26888 | 8.083049 | -4.57886 | 3.12E-05 | 0.003609 | 2.292819 |
| ILMN_1734929 | -0.26869 | 9.387229 | -4.28463 | 8.30E-05 | 0.006963 | 1.385333 |
| ILMN_1721218 | -0.26379 | 13.55456 | -5.03088 | 6.66E-06 | 0.001345 | 3.729314 |
| ILMN_1740466 | -0.26359 | 8.466511 | -3.6012  | 0.000727 | 0.029821 | -0.61081 |
| ILMN_1798826 | 0.263082 | 7.326562 | 5.572684 | 9.98E-07 | 0.000355 | 5.50065  |
| ILMN_1776936 | 0.259812 | 6.817782 | 3.38528  | 0.00139  | 0.043808 | -1.20161 |
| ILMN_1778360 | 0.259386 | 10.85475 | 4.363111 | 6.41E-05 | 0.005894 | 1.624952 |
| ILMN_1814215 | 0.258621 | 7.380656 | 3.748624 | 0.000461 | 0.022006 | -0.19548 |
| ILMN_1741159 | -0.25759 | 6.520576 | -4.63418 | 2.59E-05 | 0.003165 | 2.466102 |
| ILMN_1672094 | 0.25669  | 6.754803 | 5.644283 | 7.75E-07 | 0.0003   | 5.737665 |
| ILMN_2108735 | 0.256349 | 6.308979 | 3.902732 | 0.000285 | 0.015983 | 0.24822  |
| ILMN_1708934 | -0.25553 | 11.66936 | -3.83767 | 0.000349 | 0.018505 | 0.059764 |
| ILMN_2117171 | -0.25546 | 10.7705  | -6.36585 | 5.86E-08 | 5.32E-05 | 8.148862 |
| ILMN_1765860 | -0.25538 | 6.948261 | -4.13747 | 0.000134 | 0.009865 | 0.941244 |
| ILMN_1652580 | 0.253064 | 7.794553 | 8.102251 | 1.15E-10 | 1.32E-06 | 13.95083 |
| ILMN_1769839 | 0.25285  | 5.604133 | 6.128481 | 1.38E-07 | 9.11E-05 | 7.352318 |



|              |          |          |          |          |          |          |
|--------------|----------|----------|----------|----------|----------|----------|
| ILMN_1778561 | -0.25082 | 9.533894 | -4.57055 | 3.21E-05 | 0.003674 | 2.266872 |
| ILMN_2339955 | -0.25069 | 7.058355 | -3.59767 | 0.000734 | 0.030072 | -0.62061 |
| ILMN_1703180 | -0.25033 | 7.621498 | -3.922   | 0.000268 | 0.015534 | 0.304351 |
| ILMN_1703891 | -0.24998 | 8.40525  | -7.06577 | 4.70E-09 | 1.50E-05 | 10.50148 |
| ILMN_1767365 | -0.24925 | 7.134126 | -5.31627 | 2.46E-06 | 0.000708 | 4.656915 |
| ILMN_1745471 | -0.24804 | 9.161866 | -3.3681  | 0.001462 | 0.044858 | -1.24766 |
| ILMN_1708130 | -0.24728 | 8.245502 | -5.02869 | 6.71E-06 | 0.001346 | 3.722271 |
| ILMN_1716988 | -0.24717 | 8.836059 | -3.36154 | 0.001491 | 0.045292 | -1.26521 |
| ILMN_1671895 | 0.245309 | 6.998514 | 6.332541 | 6.61E-08 | 5.56E-05 | 8.036961 |
| ILMN_3268403 | 0.244386 | 5.923422 | 8.654311 | 1.63E-11 | 2.81E-07 | 15.75172 |
| ILMN_2086077 | -0.2431  | 8.675336 | -3.43538 | 0.001198 | 0.039828 | -1.06647 |
| ILMN_2326712 | -0.24246 | 7.108977 | -4.47627 | 4.40E-05 | 0.004541 | 1.973628 |
| ILMN_1797236 | 0.241859 | 6.569355 | 4.725654 | 1.90E-05 | 0.002638 | 2.754254 |
| ILMN_1742166 | 0.240845 | 8.381935 | 5.346771 | 2.21E-06 | 0.000652 | 4.756829 |
| ILMN_1716446 | -0.23767 | 7.655153 | -4.80927 | 1.43E-05 | 0.002095 | 3.019381 |
| ILMN_1675616 | -0.23565 | 6.875555 | -3.89156 | 0.000295 | 0.016344 | 0.215735 |
| ILMN_2130411 | 0.233589 | 9.58704  | 4.65257  | 2.43E-05 | 0.003061 | 2.523861 |
| ILMN_1765876 | -0.23238 | 6.010988 | -4.58813 | 3.02E-05 | 0.003534 | 2.321806 |
| ILMN_1744239 | -0.23034 | 7.234171 | -6.78063 | 1.31E-08 | 2.27E-05 | 9.543456 |
| ILMN_3310840 | -0.22884 | 7.508302 | -3.93366 | 0.000258 | 0.015209 | 0.338395 |
| ILMN_2048633 | -0.2287  | 6.738295 | -5.3857  | 1.93E-06 | 0.000582 | 4.88454  |
| ILMN_1800225 | 0.228522 | 7.195323 | 3.5409   | 0.000873 | 0.033133 | -0.77795 |
| ILMN_1815079 | -0.22815 | 7.332429 | -3.51247 | 0.000951 | 0.034911 | -0.8562  |
| ILMN_1675992 | -0.22797 | 7.571294 | -5.50029 | 1.29E-06 | 0.000412 | 5.261591 |
| ILMN_2391264 | 0.227488 | 9.11132  | 3.701895 | 0.000533 | 0.024369 | -0.32812 |
| ILMN_1674620 | -0.22676 | 8.612633 | -4.50185 | 4.04E-05 | 0.004285 | 2.052949 |
| ILMN_1778319 | 0.225956 | 9.088586 | 3.50222  | 0.000981 | 0.035476 | -0.8843  |
| ILMN_1813489 | 0.225848 | 7.79926  | 6.313999 | 7.06E-08 | 5.66E-05 | 7.97469  |
| ILMN_2229379 | -0.22567 | 6.13363  | -3.56712 | 0.000806 | 0.03191  | -0.70546 |
| ILMN_1758213 | 0.225133 | 7.772904 | 5.891516 | 3.21E-07 | 0.000151 | 6.559904 |
| ILMN_1759184 | 0.22512  | 9.801106 | 4.806981 | 1.44E-05 | 0.002102 | 3.012107 |
| ILMN_1736729 | -0.22441 | 6.390611 | -3.36988 | 0.001455 | 0.044742 | -1.2429  |
| ILMN_1701837 | -0.22393 | 8.208807 | -6.43845 | 4.51E-08 | 4.55E-05 | 8.392816 |
| ILMN_2285404 | 0.223459 | 9.479853 | 3.969103 | 0.000231 | 0.01406  | 0.442146 |
| ILMN_3247848 | 0.223135 | 6.89447  | 4.776816 | 1.60E-05 | 0.002291 | 2.91629  |
| ILMN_1786429 | -0.22311 | 8.409264 | -3.50608 | 0.000969 | 0.035251 | -0.87372 |
| ILMN_1720373 | 0.222294 | 11.35699 | 4.863951 | 1.18E-05 | 0.001881 | 3.193611 |
| ILMN_1683127 | -0.22173 | 9.525091 | -3.60572 | 0.000717 | 0.029624 | -0.5982  |
| ILMN_2103397 | 0.221546 | 6.499243 | 5.637934 | 7.92E-07 | 0.000303 | 5.716625 |
| ILMN_1805064 | -0.2211  | 7.068874 | -3.54303 | 0.000867 | 0.033102 | -0.77207 |
| ILMN_2191568 | 0.221059 | 8.435229 | 5.503112 | 1.28E-06 | 0.000411 | 5.270902 |
| ILMN_1738759 | 0.220462 | 8.423502 | 7.643064 | 5.90E-10 | 5.09E-06 | 12.43144 |
| ILMN_1719204 | 0.220104 | 9.238663 | 6.026292 | 1.98E-07 | 0.000112 | 7.010176 |
| ILMN_1800573 | 0.215836 | 11.20054 | 4.014893 | 0.000199 | 0.012768 | 0.576886 |
| ILMN_1669113 | 0.215551 | 7.508813 | 5.291409 | 2.69E-06 | 0.000748 | 4.575597 |
| ILMN_1705302 | 0.2149   | 6.800363 | 3.743804 | 0.000468 | 0.022277 | -0.2092  |
| ILMN_3223181 | 0.214885 | 8.419154 | 4.188107 | 0.000114 | 0.008774 | 1.093256 |
| ILMN_1762275 | 0.214858 | 7.5074   | 5.87017  | 3.47E-07 | 0.000159 | 6.488707 |
| ILMN_1844611 | 0.214577 | 6.621864 | 6.353854 | 6.12E-08 | 5.32E-05 | 8.108555 |
| ILMN_1680453 | 0.214413 | 7.924674 | 4.24876  | 9.34E-05 | 0.007589 | 1.276446 |
| ILMN_2168520 | -0.21417 | 7.828221 | -3.7321  | 0.000486 | 0.022942 | -0.24248 |
| ILMN_1702609 | -0.21403 | 8.422294 | -4.40067 | 5.66E-05 | 0.005449 | 1.740287 |
| ILMN_1686555 | 0.213184 | 6.820999 | 4.425712 | 5.21E-05 | 0.0051   | 1.8174   |
| ILMN_2365595 | -0.21305 | 9.784162 | -5.19802 | 3.73E-06 | 0.000899 | 4.270947 |

|              |          |          |          |          |          |          |
|--------------|----------|----------|----------|----------|----------|----------|
| ILMN_1701331 | 0.211983 | 9.805817 | 7.313114 | 1.93E-09 | 8.24E-06 | 11.33046 |
| ILMN_2383484 | 0.21142  | 8.386668 | 5.809561 | 4.30E-07 | 0.000193 | 6.286748 |
| ILMN_1722634 | 0.211185 | 10.63075 | 4.449875 | 4.80E-05 | 0.004816 | 1.891981 |
| ILMN_1668629 | 0.211152 | 9.24065  | 3.597223 | 0.000735 | 0.030077 | -0.62187 |
| ILMN_2396982 | 0.21085  | 9.162116 | 6.050179 | 1.82E-07 | 0.000106 | 7.090099 |
| ILMN_1691731 | -0.21033 | 6.980087 | -3.57931 | 0.000777 | 0.031208 | -0.67165 |
| ILMN_1724181 | -0.21008 | 6.919197 | -4.97365 | 8.12E-06 | 0.001544 | 3.545032 |
| ILMN_1799890 | 0.209114 | 8.428338 | 4.974736 | 8.09E-06 | 0.001544 | 3.548524 |
| ILMN_1740429 | 0.208858 | 12.17058 | 3.860684 | 0.000325 | 0.017647 | 0.126232 |
| ILMN_1808713 | 0.208271 | 5.671269 | 4.202028 | 0.000109 | 0.008524 | 1.135196 |
| ILMN_2307450 | 0.208056 | 8.411141 | 3.997351 | 0.000211 | 0.013255 | 0.525175 |
| ILMN_2178855 | 0.206915 | 7.786853 | 5.127087 | 4.77E-06 | 0.001087 | 4.040485 |
| ILMN_1662640 | 0.206595 | 9.417851 | 3.974895 | 0.000226 | 0.01391  | 0.459146 |
| ILMN_1700109 | 0.205742 | 9.491388 | 4.03934  | 0.000184 | 0.012201 | 0.649131 |
| ILMN_1679093 | 0.205328 | 9.146616 | 3.763036 | 0.000441 | 0.021449 | -0.15439 |
| ILMN_1808777 | 0.205162 | 8.520059 | 4.503022 | 4.02E-05 | 0.004281 | 2.056601 |
| ILMN_1677919 | -0.20408 | 8.942454 | -5.13596 | 4.63E-06 | 0.001068 | 4.069263 |
| ILMN_1772981 | 0.204013 | 10.56743 | 5.902338 | 3.09E-07 | 0.00015  | 6.596011 |
| ILMN_1653358 | -0.20323 | 6.534286 | -3.3976  | 0.00134  | 0.042747 | -1.1685  |
| ILMN_2074748 | 0.202406 | 6.155482 | 5.343068 | 2.24E-06 | 0.000655 | 4.744693 |
| ILMN_1754842 | 0.20212  | 7.573756 | 4.868569 | 1.17E-05 | 0.001878 | 3.208355 |
| ILMN_1794190 | -0.20197 | 6.986232 | -4.46534 | 4.56E-05 | 0.00468  | 1.939801 |
| ILMN_1752953 | 0.201267 | 8.974141 | 5.614121 | 8.62E-07 | 0.000323 | 5.637752 |
| ILMN_1690105 | -0.20106 | 8.328354 | -3.33759 | 0.0016   | 0.047389 | -1.32912 |
| ILMN_1775962 | -0.20082 | 7.38938  | -4.45582 | 4.71E-05 | 0.00479  | 1.910353 |
| ILMN_1684964 | 0.200763 | 7.346486 | 4.236896 | 9.71E-05 | 0.007856 | 1.24052  |
| ILMN_2381197 | -0.20059 | 7.79262  | -4.9057  | 1.03E-05 | 0.001773 | 3.327072 |
| ILMN_1703330 | -0.20049 | 8.192523 | -3.91776 | 0.000271 | 0.015534 | 0.29198  |
| ILMN_1736575 | 0.200006 | 8.552527 | 4.937363 | 9.20E-06 | 0.001652 | 3.428517 |
| ILMN_1770537 | 0.199743 | 6.388881 | 5.586075 | 9.52E-07 | 0.000342 | 5.544937 |
| ILMN_1755909 | 0.199555 | 9.400336 | 6.416282 | 4.89E-08 | 4.68E-05 | 8.318317 |
| ILMN_2285817 | -0.19951 | 9.961391 | -3.83166 | 0.000356 | 0.018691 | 0.042439 |
| ILMN_1683635 | -0.19937 | 7.995629 | -3.63033 | 0.000665 | 0.028015 | -0.52947 |
| ILMN_3235325 | 0.199317 | 6.910267 | 3.529837 | 0.000902 | 0.03396  | -0.80844 |
| ILMN_1693421 | 0.1992   | 9.359146 | 6.459711 | 4.18E-08 | 4.37E-05 | 8.464292 |
| ILMN_2301083 | 0.19913  | 10.92932 | 4.834955 | 1.31E-05 | 0.001977 | 3.101144 |
| ILMN_2120022 | -0.19867 | 7.027162 | -4.02655 | 0.000192 | 0.012526 | 0.611297 |
| ILMN_1697218 | 0.198196 | 8.347213 | 5.058721 | 6.05E-06 | 0.001272 | 3.819194 |
| ILMN_1676515 | 0.197903 | 7.899452 | 3.692502 | 0.000549 | 0.024798 | -0.35467 |
| ILMN_1658425 | 0.197032 | 8.352206 | 5.248425 | 3.13E-06 | 0.000798 | 4.435204 |
| ILMN_1674034 | -0.19643 | 8.200939 | -4.31745 | 7.45E-05 | 0.006553 | 1.485324 |
| ILMN_1675709 | 0.195906 | 7.207505 | 6.653702 | 2.08E-08 | 2.87E-05 | 9.116617 |
| ILMN_2061732 | -0.19519 | 9.634742 | -4.02326 | 0.000194 | 0.012553 | 0.601599 |
| ILMN_3247018 | -0.19483 | 8.265002 | -5.99347 | 2.23E-07 | 0.000122 | 6.90042  |
| ILMN_1704793 | 0.194785 | 8.555961 | 4.669246 | 2.30E-05 | 0.002936 | 2.576319 |
| ILMN_1676631 | 0.194407 | 6.992579 | 3.463795 | 0.0011   | 0.037789 | -0.98928 |
| ILMN_2173611 | 0.193725 | 12.17228 | 3.807335 | 0.000384 | 0.019694 | -0.02755 |
| ILMN_1738681 | 0.19294  | 10.25065 | 6.114714 | 1.44E-07 | 9.22E-05 | 7.306192 |
| ILMN_1703487 | -0.19257 | 8.843029 | -4.56564 | 3.26E-05 | 0.003717 | 2.251535 |
| ILMN_2392370 | 0.192392 | 6.342761 | 3.595252 | 0.00074  | 0.030187 | -0.62736 |
| ILMN_1691436 | -0.19208 | 9.590865 | -4.60436 | 2.86E-05 | 0.003415 | 2.372605 |
| ILMN_1764571 | 0.191231 | 10.18131 | 3.615479 | 0.000696 | 0.028963 | -0.57098 |
| ILMN_1656933 | 0.191167 | 6.331613 | 4.477424 | 4.38E-05 | 0.004538 | 1.977217 |
| ILMN_1669479 | 0.191121 | 7.352698 | 3.574264 | 0.000789 | 0.031452 | -0.68566 |

|              |          |          |          |          |          |          |
|--------------|----------|----------|----------|----------|----------|----------|
| ILMN_1665831 | 0.189996 | 8.995949 | 4.524969 | 3.74E-05 | 0.004072 | 2.124809 |
| ILMN_2183409 | 0.18901  | 8.259481 | 4.319412 | 7.40E-05 | 0.006528 | 1.491297 |
| ILMN_1656670 | -0.18857 | 6.613323 | -5.73256 | 5.66E-07 | 0.000235 | 6.030603 |
| ILMN_1715401 | 0.188487 | 8.08212  | 3.472876 | 0.001071 | 0.03739  | -0.96453 |
| ILMN_1710752 | -0.18813 | 8.511522 | -4.88736 | 1.09E-05 | 0.001811 | 3.268396 |
| ILMN_1789642 | 0.188095 | 6.892939 | 5.311884 | 2.50E-06 | 0.000713 | 4.64257  |
| ILMN_1811195 | 0.188049 | 6.387587 | 4.621262 | 2.70E-05 | 0.003271 | 2.425565 |
| ILMN_1694111 | 0.1879   | 8.130744 | 5.339762 | 2.27E-06 | 0.000657 | 4.733859 |
| ILMN_1810467 | 0.187843 | 10.56074 | 4.848859 | 1.25E-05 | 0.001927 | 3.145461 |
| ILMN_1815306 | 0.187757 | 7.293171 | 5.737409 | 5.56E-07 | 0.000234 | 6.046731 |
| ILMN_1913510 | 0.187665 | 6.677522 | 4.039633 | 0.000184 | 0.012201 | 0.65     |
| ILMN_1679401 | 0.187491 | 7.031703 | 4.375481 | 6.15E-05 | 0.005732 | 1.662888 |
| ILMN_2204467 | 0.187172 | 5.783277 | 3.472004 | 0.001074 | 0.037399 | -0.96691 |
| ILMN_1685540 | 0.187144 | 7.832534 | 4.866844 | 1.17E-05 | 0.00188  | 3.202847 |
| ILMN_1684873 | -0.18681 | 6.878608 | -3.71091 | 0.000519 | 0.023964 | -0.3026  |
| ILMN_1704418 | -0.18673 | 7.854408 | -3.60203 | 0.000725 | 0.029781 | -0.60849 |
| ILMN_2408566 | -0.1865  | 6.390289 | -3.49429 | 0.001004 | 0.035992 | -0.90602 |
| ILMN_1706342 | 0.186336 | 7.352996 | 4.104384 | 0.000149 | 0.010661 | 0.842382 |
| ILMN_2048478 | 0.186003 | 6.143759 | 4.949481 | 8.83E-06 | 0.001614 | 3.467399 |
| ILMN_1658989 | 0.185825 | 6.267611 | 5.972922 | 2.40E-07 | 0.000125 | 6.831728 |
| ILMN_2411897 | -0.18571 | 7.291889 | -3.91383 | 0.000275 | 0.015619 | 0.280544 |
| ILMN_1746494 | -0.18567 | 7.881911 | -4.30253 | 7.83E-05 | 0.006729 | 1.439812 |
| ILMN_1672504 | 0.185439 | 9.839358 | 4.481865 | 4.32E-05 | 0.004511 | 1.990976 |
| ILMN_1731720 | 0.18528  | 7.562784 | 5.004482 | 7.30E-06 | 0.001422 | 3.644236 |
| ILMN_1671191 | 0.185117 | 10.86306 | 4.712733 | 1.98E-05 | 0.002726 | 2.713431 |
| ILMN_1907834 | -0.18486 | 8.321906 | -3.70227 | 0.000533 | 0.024369 | -0.32706 |
| ILMN_1715476 | 0.184802 | 9.924509 | 4.832868 | 1.32E-05 | 0.001983 | 3.094494 |
| ILMN_2045994 | 0.184523 | 8.174052 | 5.06525  | 5.91E-06 | 0.001252 | 3.840292 |
| ILMN_1676026 | 0.183751 | 8.684089 | 4.929238 | 9.46E-06 | 0.001673 | 3.402464 |
| ILMN_2367191 | 0.183402 | 9.505748 | 4.685883 | 2.17E-05 | 0.002838 | 2.628721 |
| ILMN_2173294 | -0.18334 | 6.696235 | -4.37644 | 6.13E-05 | 0.005729 | 1.665827 |
| ILMN_2366041 | 0.183227 | 7.879147 | 4.769074 | 1.64E-05 | 0.002343 | 2.891731 |
| ILMN_1701731 | 0.183105 | 9.033921 | 4.410899 | 5.47E-05 | 0.005297 | 1.771758 |
| ILMN_1773154 | -0.18285 | 11.15561 | -3.72109 | 0.000503 | 0.023418 | -0.27374 |
| ILMN_1804822 | 0.182836 | 8.721351 | 3.770641 | 0.000431 | 0.021134 | -0.13267 |
| ILMN_1762284 | 0.182677 | 5.861403 | 6.463156 | 4.13E-08 | 4.37E-05 | 8.475871 |
| ILMN_1692790 | -0.18232 | 8.579602 | -5.20682 | 3.61E-06 | 0.000884 | 4.299579 |
| ILMN_1759175 | -0.18216 | 6.883299 | -5.73779 | 5.56E-07 | 0.000234 | 6.047989 |
| ILMN_1699570 | 0.181596 | 9.942182 | 6.074689 | 1.67E-07 | 0.000101 | 7.172143 |
| ILMN_2363273 | 0.181107 | 7.012101 | 4.304059 | 7.79E-05 | 0.006712 | 1.444479 |
| ILMN_2405680 | -0.18109 | 7.10555  | -3.62337 | 0.000679 | 0.028507 | -0.54893 |
| ILMN_2372639 | -0.18043 | 8.914962 | -3.65524 | 0.000616 | 0.026807 | -0.45962 |
| ILMN_3297880 | 0.179973 | 8.630585 | 4.112943 | 0.000145 | 0.010435 | 0.86792  |
| ILMN_1763605 | 0.17932  | 6.9534   | 6.890572 | 8.84E-09 | 1.76E-05 | 9.913057 |
| ILMN_1751886 | -0.17897 | 6.981708 | -3.36696 | 0.001467 | 0.044915 | -1.25072 |
| ILMN_1807833 | 0.17857  | 8.049537 | 6.275391 | 8.11E-08 | 6.25E-05 | 7.845061 |
| ILMN_1730906 | -0.17854 | 7.259968 | -3.65798 | 0.000611 | 0.02665  | -0.45194 |
| ILMN_2410772 | -0.17831 | 8.289186 | -4.96176 | 8.46E-06 | 0.001593 | 3.50684  |
| ILMN_2375360 | -0.17815 | 7.721413 | -3.7974  | 0.000396 | 0.02001  | -0.05608 |
| ILMN_1790160 | -0.1778  | 6.571739 | -3.99516 | 0.000212 | 0.013299 | 0.51873  |
| ILMN_1786976 | 0.17774  | 8.587619 | 5.100876 | 5.23E-06 | 0.001155 | 3.955546 |
| ILMN_1664608 | 0.177569 | 8.508847 | 4.731513 | 1.86E-05 | 0.002598 | 2.772779 |
| ILMN_2278653 | 0.177359 | 6.360961 | 5.055751 | 6.11E-06 | 0.001277 | 3.809601 |
| ILMN_1692100 | 0.176841 | 7.14129  | 4.398596 | 5.70E-05 | 0.005463 | 1.733899 |

|              |          |          |          |          |          |          |
|--------------|----------|----------|----------|----------|----------|----------|
| ILMN_1801442 | 0.176668 | 6.102062 | 4.128634 | 0.000138 | 0.010087 | 0.914804 |
| ILMN_1709044 | 0.176641 | 6.638544 | 4.415896 | 5.38E-05 | 0.005254 | 1.787148 |
| ILMN_2132458 | -0.17657 | 6.416718 | -3.43916 | 0.001185 | 0.03959  | -1.0562  |
| ILMN_1688154 | 0.175568 | 6.980757 | 3.562912 | 0.000816 | 0.032056 | -0.71712 |
| ILMN_2334350 | 0.175562 | 8.363866 | 4.077985 | 0.000163 | 0.011215 | 0.763771 |
| ILMN_1679655 | 0.175524 | 8.886264 | 3.498224 | 0.000992 | 0.035741 | -0.89525 |
| ILMN_1666078 | -0.17499 | 7.427113 | -6.21834 | 9.96E-08 | 7.31E-05 | 7.653598 |
| ILMN_2201347 | 0.174985 | 7.533335 | 4.972513 | 8.15E-06 | 0.001544 | 3.541379 |
| ILMN_2095704 | 0.174738 | 6.640483 | 3.422096 | 0.001246 | 0.040958 | -1.10241 |
| ILMN_1714730 | 0.174704 | 10.85933 | 4.168721 | 0.000121 | 0.009087 | 1.034957 |
| ILMN_1794643 | 0.174571 | 7.454543 | 5.560479 | 1.04E-06 | 0.000367 | 5.460306 |
| ILMN_1771233 | 0.174517 | 8.313767 | 6.470291 | 4.02E-08 | 4.37E-05 | 8.499858 |
| ILMN_1697363 | 0.174309 | 8.470232 | 3.520852 | 0.000927 | 0.034592 | -0.83316 |
| ILMN_1677534 | 0.17419  | 8.546457 | 3.366014 | 0.001472 | 0.044915 | -1.25325 |
| ILMN_1652677 | -0.17391 | 8.342189 | -3.3957  | 0.001348 | 0.042868 | -1.17359 |
| ILMN_1729225 | 0.173908 | 6.254295 | 3.477504 | 0.001056 | 0.036968 | -0.9519  |
| ILMN_1722811 | 0.173901 | 7.815689 | 3.311124 | 0.001729 | 0.049265 | -1.3994  |
| ILMN_1802615 | 0.173846 | 9.055348 | 3.418623 | 0.001259 | 0.041228 | -1.1118  |
| ILMN_3236061 | 0.173539 | 6.878669 | 4.314972 | 7.51E-05 | 0.006573 | 1.47775  |
| ILMN_2324056 | 0.173418 | 9.370995 | 3.687029 | 0.000558 | 0.024842 | -0.37013 |
| ILMN_1816342 | -0.17299 | 7.914214 | -3.83787 | 0.000349 | 0.018505 | 0.060324 |
| ILMN_1806790 | 0.172863 | 7.722227 | 4.051389 | 0.000177 | 0.011939 | 0.684819 |
| ILMN_2120340 | 0.172707 | 8.387977 | 5.267454 | 2.92E-06 | 0.000776 | 4.497322 |
| ILMN_1660973 | -0.17264 | 6.450034 | -3.4078  | 0.0013   | 0.042135 | -1.14101 |
| ILMN_2234343 | 0.172509 | 6.551563 | 3.954537 | 0.000242 | 0.014507 | 0.399445 |
| ILMN_2081398 | 0.17235  | 7.795199 | 5.985085 | 2.30E-07 | 0.000124 | 6.872378 |
| ILMN_1744046 | -0.17216 | 7.48544  | -5.01294 | 7.09E-06 | 0.001405 | 3.671498 |
| ILMN_1778374 | -0.17183 | 10.17323 | -4.90213 | 1.04E-05 | 0.001773 | 3.315629 |
| ILMN_2382829 | 0.171691 | 9.007533 | 6.150213 | 1.27E-07 | 8.77E-05 | 7.425149 |
| ILMN_2105308 | 0.171574 | 10.92409 | 4.590978 | 2.99E-05 | 0.003524 | 2.330717 |
| ILMN_2102693 | -0.17083 | 8.757085 | -3.56228 | 0.000818 | 0.032056 | -0.71886 |
| ILMN_2102960 | -0.17065 | 8.064303 | -4.38512 | 5.96E-05 | 0.005643 | 1.692474 |
| ILMN_3197097 | -0.17064 | 8.289104 | -3.7302  | 0.000489 | 0.023046 | -0.24787 |
| ILMN_1790136 | 0.16997  | 8.813088 | 4.323791 | 7.30E-05 | 0.006451 | 1.504667 |
| ILMN_1678454 | -0.16991 | 9.454743 | -5.16909 | 4.12E-06 | 0.000967 | 4.176853 |
| ILMN_1745242 | -0.16991 | 7.429544 | -4.03891 | 0.000184 | 0.012201 | 0.647854 |
| ILMN_1777721 | 0.169788 | 10.37908 | 5.607787 | 8.82E-07 | 0.000327 | 5.616784 |
| ILMN_1710000 | -0.16934 | 6.626573 | -6.54454 | 3.08E-08 | 3.79E-05 | 8.749499 |
| ILMN_1812856 | 0.16923  | 8.03135  | 7.474006 | 1.08E-09 | 6.22E-06 | 11.86813 |
| ILMN_1728057 | -0.1692  | 6.695851 | -5.07963 | 5.63E-06 | 0.001219 | 3.886771 |
| ILMN_1732398 | 0.168896 | 5.518001 | 4.264737 | 8.86E-05 | 0.007286 | 1.324894 |
| ILMN_1719986 | -0.16868 | 7.162071 | -3.39488 | 0.001351 | 0.042894 | -1.1758  |
| ILMN_2359453 | 0.168482 | 10.66599 | 4.763603 | 1.67E-05 | 0.002377 | 2.874385 |
| ILMN_1792679 | -0.16835 | 7.392167 | -3.46422 | 0.001099 | 0.037789 | -0.98813 |
| ILMN_1806106 | 0.168007 | 9.807794 | 3.83157  | 0.000356 | 0.018691 | 0.042166 |
| ILMN_1784110 | -0.16771 | 6.786576 | -3.85135 | 0.000335 | 0.018029 | 0.099257 |
| ILMN_1700541 | 0.167671 | 8.967071 | 3.439206 | 0.001184 | 0.03959  | -1.05609 |
| ILMN_2368713 | 0.167403 | 10.02075 | 4.563355 | 3.29E-05 | 0.003717 | 2.244411 |
| ILMN_1707783 | 0.166958 | 11.66934 | 3.743032 | 0.00047  | 0.022299 | -0.2114  |
| ILMN_2410771 | -0.16683 | 8.061131 | -5.50997 | 1.25E-06 | 0.000411 | 5.293528 |
| ILMN_1742731 | 0.16672  | 8.820646 | 5.112077 | 5.03E-06 | 0.001126 | 3.991829 |
| ILMN_1676984 | -0.16655 | 6.687393 | -4.85233 | 1.23E-05 | 0.001922 | 3.156543 |
| ILMN_2148668 | -0.1663  | 7.46236  | -3.89921 | 0.000288 | 0.016136 | 0.237968 |
| ILMN_1664028 | 0.166099 | 9.475459 | 4.855172 | 1.22E-05 | 0.00192  | 3.165597 |

|              |          |          |          |          |          |          |
|--------------|----------|----------|----------|----------|----------|----------|
| ILMN_1680465 | -0.16545 | 6.953166 | -3.48612 | 0.001029 | 0.036544 | -0.92836 |
| ILMN_1735658 | -0.16523 | 9.171766 | -3.96452 | 0.000234 | 0.014175 | 0.428704 |
| ILMN_1652594 | 0.165046 | 6.7758   | 5.268598 | 2.91E-06 | 0.000776 | 4.50106  |
| ILMN_1801313 | -0.16471 | 8.011372 | -3.45476 | 0.001131 | 0.038365 | -1.01385 |
| ILMN_1700168 | 0.164566 | 6.401959 | 3.921981 | 0.000268 | 0.015534 | 0.304292 |
| ILMN_1815024 | -0.164   | 10.93684 | -4.3012  | 7.86E-05 | 0.006742 | 1.43576  |
| ILMN_1658992 | 0.163676 | 10.34544 | 5.267271 | 2.93E-06 | 0.000776 | 4.496723 |
| ILMN_1807291 | 0.16353  | 5.682917 | 3.594647 | 0.000741 | 0.030188 | -0.62904 |
| ILMN_1728710 | 0.16342  | 6.954481 | 3.5585   | 0.000827 | 0.032266 | -0.72933 |
| ILMN_1712035 | 0.163416 | 7.517737 | 3.893636 | 0.000293 | 0.01629  | 0.221775 |
| ILMN_1660723 | 0.163269 | 7.815519 | 3.470366 | 0.001079 | 0.037464 | -0.97137 |
| ILMN_1733667 | 0.163041 | 7.146015 | 5.657224 | 7.40E-07 | 0.00029  | 5.780561 |
| ILMN_1791388 | 0.162698 | 8.038381 | 4.974707 | 8.09E-06 | 0.001544 | 3.548431 |
| ILMN_1683313 | 0.162422 | 7.73199  | 4.878969 | 1.12E-05 | 0.001838 | 3.241577 |
| ILMN_2142117 | -0.16231 | 9.308538 | -4.11217 | 0.000146 | 0.01044  | 0.865606 |
| ILMN_2394276 | -0.16208 | 7.018932 | -5.0389  | 6.48E-06 | 0.00133  | 3.755186 |
| ILMN_1714741 | -0.16198 | 7.070954 | -3.80551 | 0.000386 | 0.01977  | -0.03281 |
| ILMN_3244323 | 0.161878 | 8.420129 | 4.988456 | 7.72E-06 | 0.001494 | 3.592649 |
| ILMN_1734138 | 0.16177  | 7.228567 | 4.191438 | 0.000113 | 0.008743 | 1.103288 |
| ILMN_1785644 | 0.161693 | 7.199323 | 4.169125 | 0.000121 | 0.009087 | 1.036173 |
| ILMN_1705252 | 0.161587 | 6.430172 | 3.725341 | 0.000496 | 0.023197 | -0.26168 |
| ILMN_1751464 | -0.1612  | 6.77298  | -3.9164  | 0.000273 | 0.015534 | 0.288014 |
| ILMN_1803856 | -0.16071 | 6.942534 | -3.62339 | 0.000679 | 0.028507 | -0.54888 |
| ILMN_1781454 | 0.160641 | 8.591168 | 4.377337 | 6.11E-05 | 0.005728 | 1.668583 |
| ILMN_1669703 | 0.160472 | 8.590866 | 3.822009 | 0.000367 | 0.019072 | 0.014633 |
| ILMN_1798256 | -0.16026 | 10.07763 | -3.58664 | 0.00076  | 0.030714 | -0.6513  |
| ILMN_1681326 | 0.160005 | 5.931447 | 6.236458 | 9.33E-08 | 6.99E-05 | 7.714393 |
| ILMN_1701243 | 0.160004 | 7.875346 | 4.038393 | 0.000185 | 0.012201 | 0.646331 |
| ILMN_1714352 | 0.159676 | 7.136768 | 3.320255 | 0.001683 | 0.048567 | -1.37519 |
| ILMN_2326509 | -0.15948 | 8.811935 | -3.43285 | 0.001207 | 0.040051 | -1.07331 |
| ILMN_3239217 | 0.159464 | 6.633795 | 4.571844 | 3.19E-05 | 0.00367  | 2.270912 |
| ILMN_1670079 | -0.15928 | 8.026146 | -3.49006 | 0.001017 | 0.036364 | -0.9176  |
| ILMN_1745885 | 0.159247 | 10.33155 | 4.22465  | 0.000101 | 0.00812  | 1.203485 |
| ILMN_1756806 | -0.15912 | 8.925277 | -3.55267 | 0.000842 | 0.032579 | -0.74544 |
| ILMN_1801833 | -0.15905 | 6.69055  | -3.43092 | 0.001214 | 0.040167 | -1.07855 |
| ILMN_1665526 | 0.158704 | 6.424292 | 3.417115 | 0.001265 | 0.041319 | -1.11587 |
| ILMN_1695110 | 0.158563 | 7.942509 | 3.876396 | 0.000309 | 0.016928 | 0.171736 |
| ILMN_1719286 | 0.158512 | 7.652052 | 3.963292 | 0.000235 | 0.014201 | 0.425102 |
| ILMN_1702211 | -0.15839 | 6.537614 | -3.74684 | 0.000464 | 0.022098 | -0.20055 |
| ILMN_1764522 | 0.158016 | 7.828939 | 3.384367 | 0.001394 | 0.043886 | -1.20406 |
| ILMN_1687315 | 0.157577 | 10.13046 | 3.466804 | 0.001091 | 0.037673 | -0.98108 |
| ILMN_1790455 | 0.157531 | 6.554547 | 4.143801 | 0.000131 | 0.009706 | 0.960202 |
| ILMN_1700727 | -0.15706 | 6.382961 | -4.70373 | 2.05E-05 | 0.002744 | 2.684995 |
| ILMN_1683204 | 0.156723 | 8.05968  | 5.907633 | 3.03E-07 | 0.000149 | 6.613683 |
| ILMN_1683082 | 0.156607 | 7.593366 | 4.525294 | 3.73E-05 | 0.004072 | 2.125819 |
| ILMN_1808591 | 0.156492 | 9.949389 | 4.102476 | 0.00015  | 0.010705 | 0.836692 |
| ILMN_1784641 | 0.156322 | 10.54662 | 3.456775 | 0.001124 | 0.038324 | -1.00838 |
| ILMN_1771815 | 0.156272 | 10.19336 | 6.654702 | 2.07E-08 | 2.87E-05 | 9.119979 |
| ILMN_1750400 | -0.15614 | 6.36807  | -3.86324 | 0.000322 | 0.017561 | 0.13363  |
| ILMN_1663954 | 0.15608  | 9.208176 | 3.94169  | 0.000252 | 0.014928 | 0.361851 |
| ILMN_1797698 | 0.155868 | 7.248442 | 6.529965 | 3.25E-08 | 3.86E-05 | 8.700493 |
| ILMN_1768391 | -0.15583 | 6.295915 | -4.49123 | 4.19E-05 | 0.004399 | 2.020023 |
| ILMN_1737535 | 0.15535  | 7.809927 | 4.879032 | 1.12E-05 | 0.001838 | 3.241776 |
| ILMN_1812940 | 0.155224 | 8.171079 | 4.230794 | 9.90E-05 | 0.007996 | 1.22206  |

|              |          |          |          |          |          |          |
|--------------|----------|----------|----------|----------|----------|----------|
| ILMN_2407464 | 0.155055 | 8.370746 | 3.715812 | 0.000511 | 0.023707 | -0.28871 |
| ILMN_1770505 | -0.155   | 6.104167 | -3.63683 | 0.000652 | 0.0277   | -0.51127 |
| ILMN_1658706 | -0.15463 | 7.564188 | -3.40987 | 0.001292 | 0.041956 | -1.13543 |
| ILMN_1665797 | 0.15461  | 10.52642 | 3.881786 | 0.000304 | 0.016722 | 0.187367 |
| ILMN_2125010 | -0.15444 | 7.894929 | -4.34548 | 6.79E-05 | 0.006115 | 1.570943 |
| ILMN_1716821 | 0.154382 | 8.044105 | 3.508274 | 0.000963 | 0.035111 | -0.8677  |
| ILMN_1737426 | -0.15423 | 9.140574 | -3.6893  | 0.000555 | 0.024798 | -0.3637  |
| ILMN_1772731 | -0.15403 | 8.037967 | -3.36542 | 0.001474 | 0.044936 | -1.25485 |
| ILMN_1751743 | 0.153779 | 7.111816 | 4.868853 | 1.16E-05 | 0.001878 | 3.209261 |
| ILMN_3244803 | 0.153575 | 6.940247 | 4.372629 | 6.21E-05 | 0.00577  | 1.654138 |
| ILMN_1691117 | 0.153522 | 8.642115 | 5.032905 | 6.62E-06 | 0.001345 | 3.735851 |
| ILMN_2126239 | 0.153477 | 7.785695 | 3.752896 | 0.000455 | 0.021837 | -0.18331 |
| ILMN_1722218 | 0.153028 | 7.885802 | 4.298708 | 7.93E-05 | 0.00678  | 1.428178 |
| ILMN_1759436 | 0.152915 | 9.846954 | 3.697246 | 0.000541 | 0.024611 | -0.34126 |
| ILMN_1669390 | 0.152882 | 9.29823  | 3.364853 | 0.001477 | 0.044971 | -1.25636 |
| ILMN_1654001 | -0.15274 | 7.716196 | -4.29692 | 7.97E-05 | 0.006787 | 1.422735 |
| ILMN_2183687 | 0.152672 | 6.975102 | 4.950134 | 8.81E-06 | 0.001614 | 3.469493 |
| ILMN_1755352 | 0.152606 | 5.878212 | 3.466495 | 0.001092 | 0.037673 | -0.98192 |
| ILMN_1771987 | 0.152459 | 9.357103 | 3.754671 | 0.000453 | 0.021777 | -0.17825 |
| ILMN_2265654 | 0.152282 | 6.254246 | 5.048628 | 6.27E-06 | 0.001301 | 3.786596 |
| ILMN_1760490 | -0.1522  | 8.651016 | -4.7446  | 1.78E-05 | 0.002495 | 2.814195 |
| ILMN_1675007 | 0.152128 | 6.451682 | 5.030493 | 6.67E-06 | 0.001345 | 3.72807  |
| ILMN_1666385 | 0.152057 | 11.11719 | 3.755176 | 0.000452 | 0.021773 | -0.17681 |
| ILMN_2075820 | -0.15176 | 7.453887 | -4.79889 | 1.48E-05 | 0.002143 | 2.986394 |
| ILMN_1811729 | 0.151555 | 7.58875  | 3.796402 | 0.000398 | 0.020014 | -0.05893 |
| ILMN_2357781 | 0.151529 | 6.984022 | 3.488554 | 0.001022 | 0.036428 | -0.92172 |
| ILMN_1810334 | 0.151444 | 8.569222 | 4.051957 | 0.000177 | 0.011939 | 0.686501 |
| ILMN_1782829 | 0.151193 | 6.668202 | 4.027037 | 0.000192 | 0.012526 | 0.612747 |
| ILMN_1711383 | 0.151177 | 9.415097 | 5.291891 | 2.68E-06 | 0.000748 | 4.577174 |
| ILMN_1735955 | 0.151077 | 8.686113 | 3.319045 | 0.001689 | 0.048699 | -1.37841 |
| ILMN_1729368 | 0.151074 | 6.394802 | 5.910464 | 3.00E-07 | 0.000149 | 6.623132 |
| ILMN_1668369 | -0.15095 | 11.22509 | -3.76059 | 0.000445 | 0.02153  | -0.16137 |
| ILMN_3248857 | -0.1505  | 6.346806 | -4.03408 | 0.000187 | 0.012277 | 0.633578 |
| ILMN_2323491 | 0.150433 | 8.391228 | 4.828619 | 1.34E-05 | 0.001995 | 3.08096  |
| ILMN_1810891 | 0.150375 | 7.421438 | 3.953964 | 0.000242 | 0.014507 | 0.397768 |
| ILMN_2283388 | 0.149732 | 10.62316 | 3.942651 | 0.000251 | 0.014908 | 0.36466  |
| ILMN_1776375 | -0.14925 | 9.59331  | -4.89796 | 1.05E-05 | 0.001789 | 3.302307 |
| ILMN_1728059 | 0.149219 | 7.675856 | 4.047887 | 0.000179 | 0.012019 | 0.674441 |
| ILMN_1674394 | 0.149054 | 8.769143 | 3.465469 | 0.001095 | 0.037751 | -0.98472 |
| ILMN_1683059 | -0.14904 | 7.756932 | -3.41532 | 0.001272 | 0.041439 | -1.12073 |
| ILMN_1765684 | -0.14901 | 10.39111 | -3.42716 | 0.001228 | 0.040541 | -1.08872 |
| ILMN_1711450 | 0.148957 | 9.412244 | 3.927086 | 0.000264 | 0.015398 | 0.319188 |
| ILMN_3225784 | 0.148858 | 12.80393 | 3.32925  | 0.00164  | 0.047945 | -1.35131 |
| ILMN_1770653 | -0.14855 | 11.45875 | -4.36096 | 6.45E-05 | 0.005918 | 1.618345 |
| ILMN_1717809 | 0.148416 | 6.697764 | 3.762703 | 0.000442 | 0.021449 | -0.15534 |
| ILMN_1755862 | 0.147969 | 8.186322 | 3.553976 | 0.000839 | 0.032546 | -0.74184 |
| ILMN_1667594 | -0.14787 | 6.850008 | -3.71985 | 0.000505 | 0.023476 | -0.27725 |
| ILMN_1770338 | -0.14774 | 11.67637 | -3.45529 | 0.001129 | 0.038349 | -1.01242 |
| ILMN_1777449 | -0.14767 | 7.981589 | -3.37235 | 0.001444 | 0.044537 | -1.23628 |
| ILMN_1725427 | -0.14763 | 11.94789 | -3.40402 | 0.001315 | 0.042371 | -1.15118 |
| ILMN_1713006 | -0.14757 | 7.403597 | -3.93071 | 0.000261 | 0.0153   | 0.329753 |
| ILMN_1793203 | 0.147465 | 7.931098 | 4.558502 | 3.34E-05 | 0.003739 | 2.229268 |
| ILMN_2332558 | -0.14715 | 9.264805 | -4.58897 | 3.01E-05 | 0.003534 | 2.32445  |
| ILMN_1710844 | -0.1471  | 6.676328 | -3.89772 | 0.000289 | 0.016159 | 0.23364  |

|              |          |          |          |          |          |          |
|--------------|----------|----------|----------|----------|----------|----------|
| ILMN_2359456 | 0.146922 | 8.970854 | 4.048175 | 0.000179 | 0.012019 | 0.675296 |
| ILMN_2173451 | 0.146891 | 9.157835 | 3.630748 | 0.000664 | 0.028014 | -0.5283  |
| ILMN_1792748 | 0.14676  | 6.144422 | 4.194433 | 0.000112 | 0.008678 | 1.112308 |
| ILMN_1738229 | 0.146561 | 8.189289 | 4.210926 | 0.000106 | 0.008375 | 1.162037 |
| ILMN_1652754 | 0.146215 | 8.936248 | 3.558785 | 0.000827 | 0.032266 | -0.72854 |
| ILMN_3272768 | -0.14617 | 6.624888 | -6.00888 | 2.11E-07 | 0.000117 | 6.951944 |
| ILMN_1737685 | 0.146161 | 9.912017 | 3.336211 | 0.001606 | 0.047499 | -1.33279 |
| ILMN_1769575 | 0.146114 | 5.614811 | 3.64837  | 0.000629 | 0.027207 | -0.47892 |
| ILMN_1695679 | -0.14602 | 6.135872 | -3.37692 | 0.001425 | 0.044289 | -1.22404 |
| ILMN_1711023 | 0.145942 | 8.144351 | 4.711132 | 1.99E-05 | 0.002726 | 2.708372 |
| ILMN_1792825 | 0.145859 | 7.809389 | 3.314944 | 0.00171  | 0.04894  | -1.38928 |
| ILMN_1676197 | 0.145858 | 10.08529 | 3.37078  | 0.001451 | 0.044664 | -1.24049 |
| ILMN_2065783 | -0.14557 | 7.062967 | -5.69413 | 6.49E-07 | 0.000263 | 5.902991 |
| ILMN_1770035 | 0.14557  | 7.938254 | 6.460908 | 4.16E-08 | 4.37E-05 | 8.468315 |
| ILMN_1721225 | 0.145562 | 8.673909 | 6.047725 | 1.84E-07 | 0.000106 | 7.081889 |
| ILMN_1790537 | -0.14556 | 8.683089 | -3.32668 | 0.001652 | 0.048147 | -1.35814 |
| ILMN_3227263 | -0.14552 | 7.69568  | -3.4178  | 0.001262 | 0.04129  | -1.11403 |
| ILMN_1741585 | 0.145515 | 6.201362 | 4.582443 | 3.08E-05 | 0.003583 | 2.304029 |
| ILMN_1767658 | 0.14546  | 8.743809 | 4.248171 | 9.36E-05 | 0.007589 | 1.274661 |
| ILMN_2144573 | -0.14531 | 7.407936 | -6.93279 | 7.60E-09 | 1.75E-05 | 10.05492 |
| ILMN_1653133 | -0.14513 | 8.267472 | -5.27953 | 2.80E-06 | 0.000773 | 4.53677  |
| ILMN_3265237 | -0.1451  | 7.012253 | -3.74245 | 0.00047  | 0.022309 | -0.21306 |
| ILMN_1696190 | 0.145057 | 7.341854 | 5.179287 | 3.98E-06 | 0.00094  | 4.209998 |
| ILMN_1661484 | 0.144923 | 6.477409 | 3.85755  | 0.000328 | 0.017766 | 0.117166 |
| ILMN_1718069 | -0.14488 | 9.717053 | -3.65846 | 0.00061  | 0.026644 | -0.4506  |
| ILMN_1753885 | 0.144481 | 8.759723 | 5.668451 | 7.11E-07 | 0.000282 | 5.81779  |
| ILMN_3303673 | -0.14438 | 7.409118 | -3.84674 | 0.00034  | 0.018181 | 0.085922 |
| ILMN_1728972 | 0.144304 | 7.406871 | 4.051157 | 0.000177 | 0.011939 | 0.68413  |
| ILMN_1654488 | -0.14408 | 7.884099 | -4.0157  | 0.000199 | 0.012768 | 0.579259 |
| ILMN_1702073 | -0.14407 | 7.020506 | -5.35732 | 2.13E-06 | 0.000634 | 4.791413 |
| ILMN_1688642 | 0.143925 | 6.268217 | 3.549667 | 0.00085  | 0.03277  | -0.75375 |
| ILMN_2050255 | 0.143898 | 8.970775 | 5.739448 | 5.52E-07 | 0.000234 | 6.053507 |
| ILMN_1800311 | -0.14389 | 7.430698 | -4.45751 | 4.68E-05 | 0.004777 | 1.915581 |
| ILMN_1733863 | -0.14314 | 8.329745 | -3.33721 | 0.001602 | 0.047401 | -1.33014 |
| ILMN_1683533 | 0.143067 | 6.642611 | 4.441495 | 4.94E-05 | 0.004927 | 1.866095 |
| ILMN_1729142 | 0.143047 | 6.377382 | 3.366584 | 0.001469 | 0.044915 | -1.25173 |
| ILMN_1692754 | -0.14238 | 9.73637  | -3.57614 | 0.000784 | 0.031437 | -0.68046 |
| ILMN_2207393 | 0.142323 | 7.21087  | 4.884599 | 1.10E-05 | 0.00182  | 3.259567 |
| ILMN_1651228 | -0.14228 | 13.36566 | -6.97261 | 6.58E-09 | 1.62E-05 | 10.18869 |
| ILMN_1765770 | 0.14225  | 6.899082 | 3.377593 | 0.001422 | 0.044289 | -1.22223 |
| ILMN_1690610 | 0.142134 | 8.977126 | 4.69125  | 2.13E-05 | 0.002819 | 2.645638 |
| ILMN_1745784 | 0.141999 | 6.744723 | 3.693038 | 0.000548 | 0.024798 | -0.35316 |
| ILMN_1687857 | 0.141927 | 7.076059 | 3.472706 | 0.001072 | 0.03739  | -0.96499 |
| ILMN_3235808 | 0.141921 | 9.152855 | 4.948784 | 8.85E-06 | 0.001614 | 3.465161 |
| ILMN_1758173 | -0.14191 | 9.107964 | -4.68629 | 2.17E-05 | 0.002838 | 2.630005 |
| ILMN_1700306 | -0.14173 | 10.1864  | -3.66853 | 0.000591 | 0.025996 | -0.42225 |
| ILMN_1788547 | 0.14165  | 8.061504 | 3.807212 | 0.000384 | 0.019694 | -0.02791 |
| ILMN_1682935 | -0.1416  | 8.379604 | -4.12118 | 0.000141 | 0.010277 | 0.892533 |
| ILMN_1804329 | 0.141527 | 6.846296 | 4.673088 | 2.27E-05 | 0.00293  | 2.588413 |
| ILMN_1821473 | 0.14145  | 6.241595 | 3.751173 | 0.000458 | 0.021893 | -0.18822 |
| ILMN_1662426 | 0.141433 | 11.20601 | 4.307395 | 7.70E-05 | 0.006655 | 1.454646 |
| ILMN_1686152 | -0.14141 | 7.40316  | -4.08174 | 0.000161 | 0.011128 | 0.774952 |
| ILMN_1747744 | 0.141    | 7.483208 | 4.014795 | 0.000199 | 0.012768 | 0.576597 |
| ILMN_1666727 | 0.14088  | 7.476774 | 4.154949 | 0.000127 | 0.009421 | 0.99362  |

|              |          |          |          |          |          |          |
|--------------|----------|----------|----------|----------|----------|----------|
| ILMN_3204734 | 0.140815 | 9.880486 | 3.548605 | 0.000853 | 0.032839 | -0.75668 |
| ILMN_3219340 | 0.14081  | 12.83704 | 3.511005 | 0.000955 | 0.035028 | -0.86021 |
| ILMN_3246608 | 0.140682 | 6.307201 | 3.637203 | 0.000651 | 0.0277   | -0.51023 |
| ILMN_2175112 | -0.14064 | 6.505594 | -3.54106 | 0.000872 | 0.033133 | -0.7775  |
| ILMN_1654653 | 0.140549 | 7.652321 | 5.538333 | 1.13E-06 | 0.000389 | 5.387142 |
| ILMN_1786893 | 0.140339 | 9.273498 | 3.360402 | 0.001496 | 0.045325 | -1.26827 |
| ILMN_1741371 | -0.14018 | 6.492369 | -3.9852  | 0.000219 | 0.013631 | 0.489427 |
| ILMN_1715273 | -0.14017 | 9.627349 | -4.16998 | 0.000121 | 0.009087 | 1.038755 |
| ILMN_1669484 | 0.140056 | 9.247776 | 4.217714 | 0.000103 | 0.008241 | 1.18253  |
| ILMN_1689327 | 0.139804 | 11.86812 | 5.004905 | 7.29E-06 | 0.001422 | 3.645601 |
| ILMN_2407124 | 0.139741 | 6.874062 | 3.499223 | 0.00099  | 0.035741 | -0.89251 |
| ILMN_1737604 | -0.13969 | 7.910983 | -3.78866 | 0.000407 | 0.020302 | -0.08112 |
| ILMN_1798712 | 0.13965  | 6.692122 | 3.800621 | 0.000392 | 0.019868 | -0.04683 |
| ILMN_1765649 | 0.139577 | 7.80209  | 4.171214 | 0.00012  | 0.009073 | 1.04245  |
| ILMN_2333107 | -0.13944 | 8.586003 | -4.17249 | 0.00012  | 0.009055 | 1.046288 |
| ILMN_1772124 | 0.139399 | 7.905463 | 3.944809 | 0.000249 | 0.014858 | 0.370972 |
| ILMN_1712231 | -0.13929 | 9.444425 | -3.48691 | 0.001027 | 0.036495 | -0.92621 |
| ILMN_2387599 | 0.139277 | 11.77284 | 4.751618 | 1.74E-05 | 0.002466 | 2.836411 |
| ILMN_1804150 | -0.13909 | 9.13232  | -4.07502 | 0.000164 | 0.0113   | 0.754967 |
| ILMN_3224290 | 0.139012 | 9.645384 | 3.322847 | 0.001671 | 0.048443 | -1.36832 |
| ILMN_1697817 | -0.13895 | 7.647454 | -3.68422 | 0.000563 | 0.024994 | -0.37805 |
| ILMN_2364131 | 0.138816 | 8.838955 | 5.082808 | 5.57E-06 | 0.001214 | 3.897064 |
| ILMN_1660341 | 0.138728 | 8.027969 | 3.399388 | 0.001333 | 0.042678 | -1.16367 |
| ILMN_1702279 | 0.138561 | 7.827281 | 4.450664 | 4.79E-05 | 0.004816 | 1.894419 |
| ILMN_1729987 | 0.138557 | 8.692391 | 4.74791  | 1.76E-05 | 0.002487 | 2.824669 |
| ILMN_1722294 | -0.13824 | 7.407387 | -5.3076  | 2.54E-06 | 0.000718 | 4.628552 |
| ILMN_1673111 | 0.138104 | 9.131493 | 3.709858 | 0.00052  | 0.023987 | -0.30558 |
| ILMN_1698673 | -0.13809 | 7.12604  | -5.06507 | 5.92E-06 | 0.001252 | 3.839722 |
| ILMN_1701940 | 0.138073 | 7.001941 | 5.804244 | 4.38E-07 | 0.000194 | 6.269047 |
| ILMN_1811836 | -0.13804 | 8.139387 | -3.36865 | 0.00146  | 0.044826 | -1.24619 |
| ILMN_2369785 | 0.138024 | 12.81444 | 5.504852 | 1.27E-06 | 0.000411 | 5.27664  |
| ILMN_1727300 | 0.137983 | 7.468963 | 5.199442 | 3.71E-06 | 0.000899 | 4.275568 |
| ILMN_1755974 | 0.137799 | 7.42346  | 3.402648 | 0.00132  | 0.042432 | -1.15489 |
| ILMN_1814966 | 0.137439 | 7.410336 | 4.212699 | 0.000105 | 0.008346 | 1.167388 |
| ILMN_1747281 | -0.13743 | 7.329939 | -4.06427 | 0.00017  | 0.011592 | 0.723016 |
| ILMN_2124802 | 0.137381 | 5.790428 | 3.68987  | 0.000554 | 0.024798 | -0.36211 |
| ILMN_1755077 | -0.13733 | 11.37783 | -3.90675 | 0.000281 | 0.015911 | 0.2599   |
| ILMN_1752283 | 0.137263 | 7.497097 | 5.420497 | 1.71E-06 | 0.000522 | 4.998849 |
| ILMN_1803988 | -0.13717 | 10.12275 | -3.4947  | 0.001003 | 0.035992 | -0.90491 |
| ILMN_1718285 | 0.137054 | 6.144673 | 3.667849 | 0.000592 | 0.026018 | -0.42418 |
| ILMN_1815885 | 0.136963 | 6.751586 | 4.165045 | 0.000123 | 0.009166 | 1.023919 |
| ILMN_1676792 | 0.136934 | 12.62773 | 3.357984 | 0.001507 | 0.045529 | -1.27473 |
| ILMN_1718771 | -0.13689 | 6.72125  | -3.58077 | 0.000773 | 0.031105 | -0.6676  |
| ILMN_2337336 | 0.136858 | 6.485446 | 3.752413 | 0.000456 | 0.021839 | -0.18468 |
| ILMN_2317730 | 0.1365   | 7.618262 | 5.252908 | 3.08E-06 | 0.000792 | 4.449832 |
| ILMN_1795228 | -0.13648 | 11.03292 | -3.379   | 0.001416 | 0.044216 | -1.21846 |
| ILMN_1722426 | -0.13628 | 5.769089 | -4.36667 | 6.33E-05 | 0.005854 | 1.63585  |
| ILMN_1809957 | 0.136156 | 12.30113 | 7.000736 | 5.95E-09 | 1.58E-05 | 10.28316 |
| ILMN_1804419 | -0.13615 | 6.165495 | -3.50775 | 0.000964 | 0.035112 | -0.86915 |
| ILMN_1794781 | 0.13611  | 6.908979 | 5.276932 | 2.83E-06 | 0.000774 | 4.528282 |
| ILMN_2373266 | -0.13596 | 8.809098 | -4.96026 | 8.50E-06 | 0.001593 | 3.502003 |
| ILMN_1702835 | -0.13592 | 9.257488 | -4.0138  | 0.0002   | 0.012779 | 0.573656 |
| ILMN_2159453 | -0.13552 | 8.276362 | -3.85559 | 0.00033  | 0.017848 | 0.111507 |
| ILMN_3288755 | 0.135497 | 6.588679 | 3.803443 | 0.000389 | 0.01978  | -0.03873 |



|              |          |          |          |          |          |          |
|--------------|----------|----------|----------|----------|----------|----------|
| ILMN_3180557 | 0.135472 | 6.933027 | 5.116973 | 4.94E-06 | 0.001114 | 4.007695 |
| ILMN_1752884 | 0.135355 | 6.1438   | 3.553784 | 0.000839 | 0.032546 | -0.74237 |
| ILMN_1900270 | -0.13517 | 6.401475 | -3.37683 | 0.001425 | 0.044289 | -1.22429 |
| ILMN_1751615 | -0.13509 | 8.943403 | -3.4785  | 0.001053 | 0.036933 | -0.94918 |
| ILMN_1794213 | 0.134901 | 6.118721 | 3.477899 | 0.001055 | 0.036962 | -0.95083 |
| ILMN_1657204 | 0.134887 | 11.45826 | 3.508431 | 0.000962 | 0.035111 | -0.86727 |
| ILMN_1761069 | -0.13487 | 7.418122 | -3.54499 | 0.000862 | 0.033017 | -0.76667 |
| ILMN_1812327 | -0.13486 | 6.350576 | -4.3575  | 6.53E-05 | 0.005954 | 1.607751 |
| ILMN_1731193 | 0.134828 | 6.411773 | 5.253807 | 3.07E-06 | 0.000792 | 4.452766 |
| ILMN_1703142 | -0.13471 | 6.363091 | -4.2932  | 8.07E-05 | 0.006853 | 1.411394 |
| ILMN_1658807 | -0.13456 | 6.922589 | -4.04272 | 0.000182 | 0.01217  | 0.659137 |
| ILMN_2402806 | 0.134361 | 8.329239 | 4.605529 | 2.85E-05 | 0.003413 | 2.376263 |
| ILMN_2403555 | 0.134145 | 6.899727 | 3.892628 | 0.000294 | 0.016316 | 0.218845 |
| ILMN_1787932 | -0.1339  | 6.155758 | -3.49438 | 0.001004 | 0.035992 | -0.90576 |
| ILMN_1658015 | -0.13354 | 7.671465 | -3.86222 | 0.000323 | 0.01759  | 0.130678 |
| ILMN_1653599 | -0.13353 | 10.79695 | -3.52722 | 0.000909 | 0.034118 | -0.81565 |
| ILMN_2167922 | 0.133517 | 11.34824 | 4.785775 | 1.55E-05 | 0.002232 | 2.944725 |
| ILMN_1777444 | -0.1335  | 7.396279 | -4.67071 | 2.29E-05 | 0.002932 | 2.580926 |
| ILMN_1656066 | 0.133497 | 9.395813 | 4.946671 | 8.91E-06 | 0.001617 | 3.458379 |
| ILMN_1778803 | -0.13348 | 8.24874  | -4.93586 | 9.25E-06 | 0.001652 | 3.423682 |
| ILMN_1792078 | 0.133274 | 9.804828 | 4.276182 | 8.53E-05 | 0.007124 | 1.359651 |
| ILMN_1654064 | -0.13315 | 7.089103 | -4.65043 | 2.45E-05 | 0.003069 | 2.517138 |
| ILMN_1808391 | -0.13303 | 5.873943 | -3.87471 | 0.000311 | 0.016991 | 0.166848 |
| ILMN_1758633 | 0.132913 | 8.386412 | 3.498575 | 0.000991 | 0.035741 | -0.89429 |
| ILMN_1812461 | 0.132912 | 6.393518 | 4.848624 | 1.25E-05 | 0.001927 | 3.144711 |
| ILMN_1721704 | -0.13291 | 9.435152 | -3.37876 | 0.001417 | 0.044216 | -1.21911 |
| ILMN_1757847 | -0.13289 | 7.089486 | -4.88867 | 1.09E-05 | 0.001811 | 3.272596 |
| ILMN_2063925 | 0.132751 | 8.524528 | 4.000071 | 0.000209 | 0.013188 | 0.533188 |
| ILMN_1775486 | -0.1327  | 5.641129 | -3.63525 | 0.000655 | 0.027737 | -0.51569 |
| ILMN_1806809 | 0.132642 | 6.996511 | 3.6185   | 0.000689 | 0.028788 | -0.56254 |
| ILMN_1808860 | -0.13262 | 8.62686  | -5.00737 | 7.23E-06 | 0.001422 | 3.65353  |
| ILMN_1769734 | -0.13238 | 9.050755 | -3.89813 | 0.000289 | 0.016159 | 0.234841 |
| ILMN_1651886 | 0.132079 | 9.567376 | 4.03667  | 0.000186 | 0.012245 | 0.64123  |
| ILMN_2350574 | 0.132019 | 7.019527 | 3.376672 | 0.001426 | 0.044289 | -1.2247  |
| ILMN_1734827 | 0.131914 | 6.450167 | 4.250008 | 9.30E-05 | 0.007579 | 1.280227 |
| ILMN_1715969 | 0.131778 | 7.124269 | 4.288041 | 8.21E-05 | 0.006902 | 1.395708 |
| ILMN_1678052 | -0.13137 | 7.657149 | -3.31395 | 0.001715 | 0.04894  | -1.39193 |
| ILMN_1653896 | 0.131024 | 6.707074 | 3.563268 | 0.000815 | 0.032056 | -0.71613 |
| ILMN_1761722 | 0.130575 | 6.721795 | 4.505772 | 3.99E-05 | 0.004255 | 2.065141 |
| ILMN_1784436 | 0.130122 | 7.171081 | 3.727791 | 0.000492 | 0.023093 | -0.25473 |
| ILMN_1747223 | -0.13008 | 8.365961 | -3.82273 | 0.000366 | 0.019071 | 0.016703 |
| ILMN_1760143 | 0.129678 | 10.37174 | 4.386412 | 5.93E-05 | 0.005634 | 1.696448 |
| ILMN_2411794 | 0.129596 | 8.508565 | 4.641216 | 2.53E-05 | 0.003133 | 2.488187 |
| ILMN_1700337 | 0.129543 | 7.679403 | 3.793528 | 0.000401 | 0.020087 | -0.06717 |
| ILMN_1702866 | 0.12942  | 5.750363 | 5.420036 | 1.71E-06 | 0.000522 | 4.997331 |
| ILMN_1748894 | 0.129285 | 8.536682 | 3.763282 | 0.000441 | 0.021449 | -0.15369 |
| ILMN_1764323 | -0.1289  | 9.198453 | -4.58203 | 3.09E-05 | 0.003583 | 2.302727 |
| ILMN_2386100 | 0.128884 | 9.046575 | 3.710598 | 0.000519 | 0.023964 | -0.30349 |
| ILMN_1676759 | 0.128789 | 7.911027 | 4.310859 | 7.61E-05 | 0.006596 | 1.465206 |
| ILMN_1771824 | 0.128721 | 6.442188 | 5.134613 | 4.65E-06 | 0.001068 | 4.064897 |
| ILMN_1678949 | 0.128575 | 7.116892 | 4.427449 | 5.18E-05 | 0.005085 | 1.822753 |
| ILMN_2174081 | 0.128539 | 7.115872 | 3.350455 | 0.001541 | 0.046176 | -1.29483 |
| ILMN_1697348 | 0.128284 | 8.438112 | 3.838904 | 0.000348 | 0.018491 | 0.063311 |
| ILMN_1693145 | 0.128204 | 11.4118  | 3.904125 | 0.000283 | 0.015964 | 0.252274 |

|              |          |          |          |          |          |          |
|--------------|----------|----------|----------|----------|----------|----------|
| ILMN_1714364 | -0.12809 | 11.31818 | -3.66388 | 0.0006   | 0.026271 | -0.43535 |
| ILMN_1672947 | -0.12781 | 9.153308 | -3.5133  | 0.000948 | 0.034911 | -0.85392 |
| ILMN_1773002 | -0.12775 | 7.412498 | -3.40056 | 0.001329 | 0.042649 | -1.1605  |
| ILMN_1754727 | -0.12763 | 6.925514 | -4.21813 | 0.000103 | 0.008241 | 1.183775 |
| ILMN_1770911 | 0.127495 | 6.857643 | 4.33939  | 6.93E-05 | 0.006223 | 1.55233  |
| ILMN_1697735 | 0.127458 | 9.890322 | 5.256236 | 3.04E-06 | 0.000792 | 4.460696 |
| ILMN_1677402 | -0.12735 | 6.360593 | -3.34551 | 0.001563 | 0.0467   | -1.30803 |
| ILMN_1679195 | 0.127276 | 11.71869 | 4.131799 | 0.000137 | 0.010026 | 0.924271 |
| ILMN_1741985 | -0.12727 | 6.556949 | -4.70614 | 2.03E-05 | 0.002732 | 2.692598 |
| ILMN_1731354 | 0.127163 | 9.639258 | 4.179878 | 0.000117 | 0.008879 | 1.068496 |
| ILMN_1802646 | 0.127105 | 5.629979 | 3.326603 | 0.001652 | 0.048147 | -1.35834 |
| ILMN_3233179 | 0.127101 | 7.616117 | 3.306308 | 0.001754 | 0.04984  | -1.41216 |
| ILMN_1778255 | 0.126946 | 7.104808 | 3.749329 | 0.00046  | 0.021988 | -0.19347 |
| ILMN_1671568 | -0.12678 | 8.992622 | -3.64606 | 0.000633 | 0.027241 | -0.48541 |
| ILMN_1674421 | 0.126449 | 8.956569 | 3.702633 | 0.000532 | 0.024369 | -0.32603 |
| ILMN_1775522 | 0.126307 | 9.771732 | 3.339125 | 0.001593 | 0.047297 | -1.32504 |
| ILMN_1769158 | 0.126127 | 8.019062 | 3.637174 | 0.000651 | 0.0277   | -0.51031 |
| ILMN_2328378 | -0.12612 | 7.923599 | -3.30907 | 0.001739 | 0.049521 | -1.40485 |
| ILMN_1784540 | -0.12578 | 8.812635 | -3.45349 | 0.001135 | 0.038458 | -1.0173  |
| ILMN_1787280 | 0.125731 | 8.156233 | 3.817671 | 0.000372 | 0.019231 | 0.002154 |
| ILMN_2363591 | -0.12554 | 9.224569 | -4.20682 | 0.000107 | 0.008446 | 1.149656 |
| ILMN_2369221 | -0.12552 | 5.999184 | -3.50327 | 0.000978 | 0.035401 | -0.88143 |
| ILMN_1771966 | 0.125184 | 10.57052 | 3.479415 | 0.00105  | 0.036901 | -0.94669 |
| ILMN_1727001 | 0.124946 | 7.703579 | 3.795114 | 0.000399 | 0.020061 | -0.06262 |
| ILMN_1757914 | 0.124906 | 9.621177 | 3.327122 | 0.00165  | 0.048147 | -1.35696 |
| ILMN_2169761 | -0.1249  | 7.763599 | -3.44171 | 0.001176 | 0.039438 | -1.04929 |
| ILMN_2225061 | 0.124888 | 5.399499 | 4.842531 | 1.27E-05 | 0.001949 | 3.125284 |
| ILMN_1733875 | 0.124827 | 7.811225 | 3.929631 | 0.000261 | 0.015308 | 0.326616 |
| ILMN_1774589 | 0.124805 | 6.94714  | 3.755986 | 0.000451 | 0.021749 | -0.1745  |
| ILMN_1669268 | -0.12477 | 7.286341 | -3.51944 | 0.000931 | 0.034679 | -0.83703 |
| ILMN_1665095 | 0.124573 | 7.455196 | 3.779234 | 0.00042  | 0.020723 | -0.1081  |
| ILMN_1657631 | -0.12449 | 6.994022 | -4.51994 | 3.80E-05 | 0.004109 | 2.109171 |
| ILMN_2182704 | -0.12446 | 9.554422 | -4.31169 | 7.59E-05 | 0.006596 | 1.467727 |
| ILMN_1731165 | 0.12446  | 5.676588 | 3.369585 | 0.001456 | 0.044742 | -1.24369 |
| ILMN_1729281 | 0.12443  | 7.419073 | 4.537472 | 3.58E-05 | 0.003963 | 2.163721 |
| ILMN_1703316 | 0.124408 | 7.538053 | 3.574074 | 0.000789 | 0.031452 | -0.68619 |
| ILMN_1795639 | 0.124236 | 9.320822 | 3.676455 | 0.000577 | 0.025468 | -0.39995 |
| ILMN_2047676 | -0.12423 | 7.323166 | -3.3661  | 0.001471 | 0.044915 | -1.25303 |
| ILMN_1694759 | 0.124112 | 7.99306  | 4.184746 | 0.000115 | 0.008798 | 1.08314  |
| ILMN_1711823 | 0.124058 | 8.071418 | 3.757676 | 0.000449 | 0.021665 | -0.16968 |
| ILMN_1755664 | 0.123941 | 6.608051 | 5.236112 | 3.26E-06 | 0.000815 | 4.395042 |
| ILMN_1673522 | -0.12384 | 8.374233 | -3.57427 | 0.000789 | 0.031452 | -0.68565 |
| ILMN_1733511 | 0.123742 | 9.79902  | 4.535455 | 3.61E-05 | 0.003969 | 2.157442 |
| ILMN_1678966 | 0.123701 | 11.14048 | 3.364348 | 0.001479 | 0.044998 | -1.25771 |
| ILMN_1813657 | 0.123648 | 7.18278  | 4.023809 | 0.000194 | 0.012553 | 0.60321  |
| ILMN_1779163 | -0.12359 | 8.642296 | -3.88734 | 0.000299 | 0.016537 | 0.203479 |
| ILMN_1678054 | -0.12351 | 7.81865  | -3.37466 | 0.001434 | 0.044352 | -1.23011 |
| ILMN_1778488 | -0.12336 | 7.39079  | -4.53498 | 3.61E-05 | 0.003969 | 2.155951 |
| ILMN_2367258 | 0.122871 | 5.760206 | 3.375038 | 0.001433 | 0.044346 | -1.22908 |
| ILMN_1728626 | 0.122818 | 8.320201 | 3.908833 | 0.000279 | 0.015832 | 0.265979 |
| ILMN_1759595 | 0.122777 | 7.280271 | 5.690125 | 6.58E-07 | 0.000264 | 5.8897   |
| ILMN_1740197 | 0.122742 | 6.46239  | 4.819811 | 1.38E-05 | 0.002038 | 3.052922 |
| ILMN_1672843 | -0.12274 | 8.3593   | -4.0634  | 0.00017  | 0.011592 | 0.720448 |
| ILMN_2219134 | -0.1227  | 12.86068 | -4.2054  | 0.000108 | 0.00845  | 1.145364 |

|              |          |          |          |          |          |          |
|--------------|----------|----------|----------|----------|----------|----------|
| ILMN_1746426 | 0.122563 | 9.547126 | 4.438506 | 4.99E-05 | 0.004947 | 1.856869 |
| ILMN_1743662 | -0.12256 | 6.300212 | -4.60933 | 2.82E-05 | 0.003382 | 2.388183 |
| ILMN_1706779 | 0.122445 | 7.750245 | 3.382088 | 0.001403 | 0.043982 | -1.21017 |
| ILMN_1802338 | -0.1224  | 6.528872 | -4.90325 | 1.03E-05 | 0.001773 | 3.319217 |
| ILMN_1661170 | 0.122363 | 11.5488  | 4.063984 | 0.00017  | 0.011592 | 0.722178 |
| ILMN_1665300 | -0.12235 | 7.015094 | -5.46894 | 1.44E-06 | 0.000456 | 5.158272 |
| ILMN_2063500 | 0.122297 | 7.628167 | 4.613823 | 2.77E-05 | 0.003342 | 2.402245 |
| ILMN_1679483 | 0.122276 | 8.198779 | 3.945152 | 0.000249 | 0.014858 | 0.371974 |
| ILMN_1757343 | 0.122275 | 10.7549  | 4.379265 | 6.07E-05 | 0.00571  | 1.674501 |
| ILMN_1774196 | 0.122274 | 9.275008 | 3.926258 | 0.000264 | 0.015412 | 0.316772 |
| ILMN_1674661 | -0.12214 | 10.48293 | -3.37518 | 0.001432 | 0.044346 | -1.22869 |
| ILMN_1778240 | 0.122038 | 8.455276 | 3.534691 | 0.000889 | 0.033576 | -0.79507 |
| ILMN_1670948 | 0.121991 | 8.812808 | 4.069337 | 0.000167 | 0.01144  | 0.738072 |
| ILMN_1722089 | -0.12197 | 7.619406 | -3.68774 | 0.000557 | 0.02482  | -0.36812 |
| ILMN_2358914 | 0.121956 | 6.50809  | 4.187644 | 0.000114 | 0.008774 | 1.091863 |
| ILMN_1723467 | -0.12185 | 11.41865 | -3.99908 | 0.00021  | 0.013206 | 0.530273 |
| ILMN_1784227 | 0.121486 | 8.89894  | 4.863952 | 1.18E-05 | 0.001881 | 3.193614 |
| ILMN_1823112 | 0.121208 | 6.26093  | 4.649588 | 2.46E-05 | 0.003069 | 2.514488 |
| ILMN_1803773 | 0.121198 | 6.123491 | 4.453176 | 4.75E-05 | 0.004816 | 1.902183 |
| ILMN_1801767 | -0.12117 | 6.987505 | -3.32824 | 0.001644 | 0.048047 | -1.35399 |
| ILMN_1711909 | 0.121098 | 7.403274 | 3.420775 | 0.001251 | 0.041004 | -1.10598 |
| ILMN_3240187 | 0.12094  | 9.69429  | 4.07302  | 0.000165 | 0.01135  | 0.749013 |
| ILMN_1793743 | -0.1209  | 8.542338 | -4.04217 | 0.000183 | 0.01217  | 0.657517 |
| ILMN_1686135 | -0.12087 | 8.359989 | -3.38268 | 0.001401 | 0.043982 | -1.20858 |
| ILMN_1655952 | 0.120472 | 9.16614  | 3.733743 | 0.000483 | 0.022857 | -0.23782 |
| ILMN_1801600 | 0.120299 | 8.147344 | 3.461924 | 0.001107 | 0.037926 | -0.99437 |
| ILMN_1708787 | 0.120235 | 6.52756  | 3.567809 | 0.000804 | 0.031909 | -0.70356 |
| ILMN_1755850 | 0.120167 | 5.583099 | 3.512599 | 0.00095  | 0.034911 | -0.85583 |
| ILMN_1706960 | -0.12005 | 6.299473 | -3.76875 | 0.000433 | 0.021229 | -0.13808 |
| ILMN_1783702 | -0.11993 | 7.721322 | -3.36173 | 0.00149  | 0.045292 | -1.26471 |
| ILMN_1768194 | -0.11992 | 7.726417 | -4.63798 | 2.56E-05 | 0.003136 | 2.478018 |
| ILMN_1740430 | 0.119675 | 6.808733 | 4.413604 | 5.42E-05 | 0.005269 | 1.780086 |
| ILMN_1665049 | -0.11963 | 8.704278 | -4.53736 | 3.59E-05 | 0.003963 | 2.16338  |
| ILMN_1712944 | -0.11962 | 9.416916 | -3.82354 | 0.000365 | 0.019051 | 0.019052 |
| ILMN_1734231 | 0.119445 | 9.752719 | 3.701724 | 0.000534 | 0.024369 | -0.3286  |
| ILMN_1815656 | 0.119427 | 8.904437 | 3.467802 | 0.001087 | 0.037641 | -0.97836 |
| ILMN_1754865 | 0.119325 | 9.424259 | 4.313832 | 7.54E-05 | 0.006581 | 1.474273 |
| ILMN_2392080 | -0.11932 | 7.594627 | -3.60323 | 0.000722 | 0.029718 | -0.60514 |
| ILMN_1695797 | 0.119236 | 8.588752 | 3.496548 | 0.000998 | 0.03586  | -0.89984 |
| ILMN_1759991 | 0.11923  | 8.673025 | 4.438303 | 4.99E-05 | 0.004947 | 1.856242 |
| ILMN_1745513 | 0.11922  | 7.305104 | 3.396457 | 0.001345 | 0.042812 | -1.17156 |
| ILMN_1707199 | 0.119147 | 7.796457 | 4.3319   | 7.10E-05 | 0.006329 | 1.529435 |
| ILMN_1738103 | 0.119133 | 9.375674 | 3.375861 | 0.001429 | 0.044346 | -1.22688 |
| ILMN_1698015 | 0.118924 | 6.189212 | 4.514407 | 3.87E-05 | 0.004147 | 2.091968 |
| ILMN_1684591 | 0.118873 | 7.380275 | 4.005224 | 0.000205 | 0.012996 | 0.548372 |
| ILMN_1762439 | -0.11863 | 7.006073 | -3.75867 | 0.000447 | 0.021629 | -0.16685 |
| ILMN_3256325 | 0.118552 | 7.767774 | 3.36104  | 0.001493 | 0.045319 | -1.26656 |
| ILMN_1844692 | -0.1182  | 8.90904  | -3.34145 | 0.001582 | 0.047137 | -1.31883 |
| ILMN_1671619 | 0.117859 | 6.073866 | 4.441219 | 4.94E-05 | 0.004927 | 1.865243 |
| ILMN_2405009 | -0.11777 | 9.694206 | -3.50819 | 0.000963 | 0.035111 | -0.86793 |
| ILMN_1657129 | -0.11769 | 8.061768 | -3.72596 | 0.000495 | 0.023192 | -0.25992 |
| ILMN_3237209 | 0.117677 | 6.406315 | 4.673235 | 2.27E-05 | 0.00293  | 2.588875 |
| ILMN_1681135 | 0.117592 | 6.153082 | 5.421089 | 1.71E-06 | 0.000522 | 5.000794 |
| ILMN_1743806 | -0.11757 | 7.173525 | -3.57027 | 0.000798 | 0.031744 | -0.69673 |

|              |          |          |          |          |          |          |
|--------------|----------|----------|----------|----------|----------|----------|
| ILMN_1700733 | -0.11753 | 8.020116 | -3.83494 | 0.000352 | 0.018636 | 0.05187  |
| ILMN_1720850 | -0.11746 | 7.84599  | -4.18015 | 0.000117 | 0.008879 | 1.069303 |
| ILMN_1790461 | -0.1173  | 10.46785 | -3.99434 | 0.000213 | 0.01331  | 0.516323 |
| ILMN_2389155 | -0.11713 | 9.368498 | -4.20725 | 0.000107 | 0.008446 | 1.150944 |
| ILMN_1671603 | -0.11707 | 9.146976 | -5.97435 | 2.39E-07 | 0.000125 | 6.836506 |
| ILMN_2197247 | 0.116777 | 7.95462  | 4.181033 | 0.000116 | 0.008879 | 1.07197  |
| ILMN_1702198 | 0.116701 | 7.340192 | 4.470886 | 4.48E-05 | 0.00461  | 1.956968 |
| ILMN_2278819 | -0.11652 | 6.91849  | -4.11815 | 0.000143 | 0.010347 | 0.883455 |
| ILMN_1808047 | -0.1164  | 6.950668 | -3.48362 | 0.001037 | 0.036654 | -0.93521 |
| ILMN_1705682 | 0.116254 | 5.980359 | 3.780066 | 0.000418 | 0.020699 | -0.10572 |
| ILMN_1688011 | 0.116192 | 7.523639 | 4.35094  | 6.67E-05 | 0.006053 | 1.58767  |
| ILMN_2175114 | -0.11611 | 5.816607 | -3.64742 | 0.000631 | 0.027218 | -0.48158 |
| ILMN_3238269 | 0.116015 | 8.443412 | 4.164159 | 0.000123 | 0.009166 | 1.021257 |
| ILMN_1737611 | 0.115991 | 6.66995  | 4.695003 | 2.11E-05 | 0.002794 | 2.657472 |
| ILMN_1730077 | 0.115958 | 8.436897 | 4.598678 | 2.92E-05 | 0.003457 | 2.354813 |
| ILMN_1781803 | 0.115932 | 6.925614 | 4.085971 | 0.000159 | 0.011033 | 0.787527 |
| ILMN_1813344 | 0.11573  | 8.433726 | 3.326378 | 0.001653 | 0.048147 | -1.35894 |
| ILMN_2053567 | 0.115699 | 7.403784 | 4.117346 | 0.000143 | 0.010352 | 0.881067 |
| ILMN_3307786 | 0.115436 | 7.343689 | 4.093486 | 0.000155 | 0.010908 | 0.809901 |
| ILMN_3225300 | -0.11543 | 9.027645 | -3.9325  | 0.000259 | 0.015239 | 0.335007 |
| ILMN_1722522 | -0.11534 | 7.330681 | -4.62744 | 2.65E-05 | 0.003215 | 2.444955 |
| ILMN_1695311 | -0.11528 | 6.497101 | -3.64322 | 0.000639 | 0.027399 | -0.49336 |
| ILMN_1791097 | 0.115081 | 7.561567 | 3.41466  | 0.001274 | 0.04148  | -1.1225  |
| ILMN_1683916 | -0.11502 | 8.270671 | -3.54254 | 0.000868 | 0.033115 | -0.77343 |
| ILMN_1819783 | -0.11444 | 7.253281 | -3.31477 | 0.001711 | 0.04894  | -1.38973 |
| ILMN_1768930 | 0.114359 | 10.04637 | 3.760925 | 0.000444 | 0.02153  | -0.16041 |
| ILMN_1654289 | 0.114309 | 8.02617  | 3.924092 | 0.000266 | 0.015492 | 0.310451 |
| ILMN_2399264 | 0.114299 | 6.216862 | 4.113955 | 0.000145 | 0.010423 | 0.87094  |
| ILMN_1781791 | -0.11418 | 7.244427 | -3.72503 | 0.000497 | 0.023197 | -0.26258 |
| ILMN_1737360 | 0.114132 | 5.933497 | 3.80403  | 0.000388 | 0.01978  | -0.03704 |
| ILMN_1809488 | -0.11395 | 10.62056 | -3.56376 | 0.000814 | 0.032056 | -0.71477 |
| ILMN_1729314 | -0.11392 | 6.349821 | -3.54129 | 0.000872 | 0.033133 | -0.77686 |
| ILMN_1692748 | -0.1139  | 7.544309 | -3.48949 | 0.001019 | 0.036364 | -0.91917 |
| ILMN_3249742 | 0.113839 | 6.037584 | 3.72818  | 0.000492 | 0.023093 | -0.25362 |
| ILMN_1669308 | 0.113745 | 7.241029 | 3.979611 | 0.000223 | 0.013776 | 0.472999 |
| ILMN_1750636 | 0.113644 | 11.9311  | 3.359878 | 0.001498 | 0.045355 | -1.26966 |
| ILMN_2043109 | 0.113253 | 7.624979 | 4.264225 | 8.88E-05 | 0.007286 | 1.32334  |
| ILMN_1659800 | -0.11322 | 5.620496 | -3.69026 | 0.000553 | 0.024798 | -0.36101 |
| ILMN_1806010 | -0.11303 | 6.587764 | -4.17866 | 0.000117 | 0.008895 | 1.064842 |
| ILMN_1758339 | 0.113025 | 6.375826 | 3.350225 | 0.001542 | 0.046176 | -1.29545 |
| ILMN_1679324 | 0.113    | 9.648037 | 3.529087 | 0.000904 | 0.033963 | -0.8105  |
| ILMN_1658290 | 0.112868 | 7.569182 | 4.086318 | 0.000158 | 0.011033 | 0.788559 |
| ILMN_1778242 | 0.11285  | 10.31384 | 3.483068 | 0.001039 | 0.036654 | -0.93671 |
| ILMN_1662161 | 0.112786 | 6.398688 | 4.035004 | 0.000187 | 0.012264 | 0.636302 |
| ILMN_1693438 | -0.11276 | 7.133441 | -3.91728 | 0.000272 | 0.015534 | 0.290582 |
| ILMN_1658677 | 0.11269  | 5.559248 | 3.803652 | 0.000389 | 0.01978  | -0.03813 |
| ILMN_1738420 | 0.11269  | 5.652472 | 4.185911 | 0.000115 | 0.008798 | 1.086646 |
| ILMN_1657058 | -0.11248 | 5.838526 | -3.97251 | 0.000228 | 0.013966 | 0.452142 |
| ILMN_1664025 | 0.112449 | 6.58128  | 3.455467 | 0.001128 | 0.038349 | -1.01194 |
| ILMN_2397024 | -0.11204 | 9.407902 | -3.69263 | 0.000549 | 0.024798 | -0.35431 |
| ILMN_1675577 | 0.111843 | 7.180331 | 4.477396 | 4.38E-05 | 0.004538 | 1.977129 |
| ILMN_1772677 | 0.111783 | 8.256293 | 4.271424 | 8.67E-05 | 0.007193 | 1.345196 |
| ILMN_1811560 | 0.111641 | 8.083334 | 3.801635 | 0.000391 | 0.019839 | -0.04392 |
| ILMN_1812441 | 0.111605 | 8.001096 | 3.546789 | 0.000857 | 0.032877 | -0.7617  |

|              |          |          |          |          |          |          |
|--------------|----------|----------|----------|----------|----------|----------|
| ILMN_2198393 | -0.11151 | 8.687471 | -3.77515 | 0.000425 | 0.020898 | -0.11977 |
| ILMN_1671326 | 0.111497 | 6.730258 | 3.788575 | 0.000407 | 0.020302 | -0.08136 |
| ILMN_2360784 | 0.111433 | 9.320021 | 3.321264 | 0.001678 | 0.048546 | -1.37252 |
| ILMN_1798164 | -0.1114  | 9.01414  | -3.44927 | 0.001149 | 0.038809 | -1.02878 |
| ILMN_1683096 | -0.11129 | 7.129923 | -3.55769 | 0.000829 | 0.032309 | -0.73158 |
| ILMN_1779639 | -0.11116 | 6.887925 | -3.53881 | 0.000878 | 0.033234 | -0.78372 |
| ILMN_1676955 | -0.11113 | 7.835196 | -3.78111 | 0.000417 | 0.020661 | -0.10274 |
| ILMN_1711102 | -0.11092 | 7.192119 | -3.75296 | 0.000455 | 0.021837 | -0.18311 |
| ILMN_2281186 | -0.11091 | 5.81226  | -4.4646  | 4.57E-05 | 0.00468  | 1.937528 |
| ILMN_2352121 | -0.11081 | 9.799415 | -3.70529 | 0.000528 | 0.024295 | -0.31851 |
| ILMN_3251742 | 0.110777 | 7.084747 | 3.483081 | 0.001039 | 0.036654 | -0.93668 |
| ILMN_1691341 | 0.110749 | 6.484653 | 3.727812 | 0.000492 | 0.023093 | -0.25467 |
| ILMN_1687275 | 0.110584 | 8.405381 | 3.847352 | 0.000339 | 0.018174 | 0.087695 |
| ILMN_2323633 | 0.110566 | 8.173019 | 3.895057 | 0.000292 | 0.016243 | 0.225905 |
| ILMN_1803906 | -0.11045 | 6.160431 | -3.37502 | 0.001433 | 0.044346 | -1.22913 |
| ILMN_1725079 | 0.11042  | 7.7611   | 3.690842 | 0.000552 | 0.024798 | -0.35936 |
| ILMN_1669142 | 0.11004  | 7.797861 | 3.694115 | 0.000546 | 0.024785 | -0.35011 |
| ILMN_2094952 | -0.11002 | 6.927402 | -3.63515 | 0.000655 | 0.027737 | -0.51597 |
| ILMN_1806937 | 0.109829 | 8.86122  | 4.330333 | 7.14E-05 | 0.006341 | 1.524645 |
| ILMN_1712859 | -0.10944 | 6.573917 | -4.08917 | 0.000157 | 0.010993 | 0.797047 |
| ILMN_1685286 | 0.108951 | 6.625015 | 3.782909 | 0.000415 | 0.020575 | -0.09759 |
| ILMN_1777528 | 0.108802 | 8.948298 | 3.996399 | 0.000211 | 0.013271 | 0.522373 |
| ILMN_2242068 | 0.108732 | 6.378102 | 3.517001 | 0.000938 | 0.034825 | -0.84374 |
| ILMN_2181445 | -0.10869 | 9.481545 | -4.32975 | 7.15E-05 | 0.006341 | 1.522877 |
| ILMN_1691112 | -0.10861 | 7.70707  | -3.68323 | 0.000565 | 0.025005 | -0.38084 |
| ILMN_1741736 | -0.10856 | 8.045154 | -3.84463 | 0.000342 | 0.018245 | 0.079826 |
| ILMN_2352724 | -0.10828 | 7.306223 | -3.55057 | 0.000847 | 0.032718 | -0.75126 |
| ILMN_3261197 | 0.108269 | 10.5973  | 3.367275 | 0.001466 | 0.044915 | -1.24988 |
| ILMN_2058141 | 0.108209 | 11.87573 | 3.704362 | 0.000529 | 0.0243   | -0.32114 |
| ILMN_2144791 | -0.10817 | 7.125175 | -3.84095 | 0.000346 | 0.018403 | 0.069227 |
| ILMN_2341467 | 0.108098 | 9.430058 | 3.773711 | 0.000427 | 0.020962 | -0.1239  |
| ILMN_1694504 | 0.108085 | 7.615096 | 3.590374 | 0.000751 | 0.030491 | -0.64093 |
| ILMN_1704500 | -0.10804 | 6.769832 | -3.56476 | 0.000812 | 0.032053 | -0.712   |
| ILMN_2124361 | 0.107929 | 6.170762 | 4.081002 | 0.000161 | 0.011128 | 0.772744 |
| ILMN_1728224 | 0.107888 | 7.247527 | 3.320295 | 0.001683 | 0.048567 | -1.37509 |
| ILMN_2073010 | 0.107887 | 8.622636 | 3.416923 | 0.001266 | 0.041319 | -1.11639 |
| ILMN_1904135 | 0.107822 | 6.387132 | 3.634787 | 0.000656 | 0.027737 | -0.517   |
| ILMN_2346727 | -0.10777 | 7.1026   | -3.68242 | 0.000566 | 0.025036 | -0.38314 |
| ILMN_1755221 | -0.10769 | 7.623086 | -3.9651  | 0.000234 | 0.014174 | 0.430392 |
| ILMN_1732053 | 0.107534 | 10.0834  | 3.339375 | 0.001592 | 0.047297 | -1.32437 |
| ILMN_1793267 | 0.107352 | 6.14238  | 3.35162  | 0.001535 | 0.046067 | -1.29172 |
| ILMN_1773066 | -0.10693 | 7.448939 | -3.39876 | 0.001336 | 0.042702 | -1.16537 |
| ILMN_1698166 | -0.10678 | 7.116865 | -4.02243 | 0.000194 | 0.012553 | 0.599142 |
| ILMN_3244526 | 0.106686 | 7.229915 | 3.406511 | 0.001305 | 0.042165 | -1.14448 |
| ILMN_1770667 | -0.10665 | 7.11012  | -3.65104 | 0.000624 | 0.027053 | -0.47144 |
| ILMN_1761828 | 0.106447 | 8.61968  | 3.621738 | 0.000682 | 0.028587 | -0.5535  |
| ILMN_1702231 | -0.10625 | 6.19729  | -3.35878 | 0.001503 | 0.045462 | -1.27261 |
| ILMN_1867321 | 0.106126 | 6.243638 | 4.930747 | 9.41E-06 | 0.001673 | 3.407302 |
| ILMN_1717337 | -0.10572 | 10.11213 | -3.86899 | 0.000317 | 0.017273 | 0.150263 |
| ILMN_1775753 | 0.10554  | 6.932964 | 3.567036 | 0.000806 | 0.03191  | -0.7057  |
| ILMN_1788095 | 0.105261 | 6.731435 | 3.722433 | 0.000501 | 0.023352 | -0.26993 |
| ILMN_1749345 | -0.10518 | 9.090378 | -3.41393 | 0.001277 | 0.041531 | -1.12448 |
| ILMN_1735402 | 0.105141 | 7.127156 | 4.278508 | 8.47E-05 | 0.007087 | 1.366719 |
| ILMN_1701655 | 0.105136 | 7.201903 | 3.812669 | 0.000378 | 0.019476 | -0.01223 |

|              |          |          |          |          |          |          |
|--------------|----------|----------|----------|----------|----------|----------|
| ILMN_1721344 | -0.10505 | 6.880078 | -3.64175 | 0.000642 | 0.027488 | -0.49747 |
| ILMN_1713406 | 0.105018 | 8.336282 | 3.920207 | 0.000269 | 0.015534 | 0.299118 |
| ILMN_1767766 | 0.104824 | 9.131113 | 3.807658 | 0.000384 | 0.019694 | -0.02662 |
| ILMN_1811178 | -0.10471 | 7.144893 | -3.63926 | 0.000647 | 0.027631 | -0.50448 |
| ILMN_2083567 | 0.104483 | 6.215335 | 3.334859 | 0.001613 | 0.047559 | -1.33639 |
| ILMN_1673172 | 0.104229 | 6.986877 | 3.637125 | 0.000651 | 0.0277   | -0.51045 |
| ILMN_2352190 | 0.104157 | 6.39338  | 3.688705 | 0.000556 | 0.024798 | -0.36539 |
| ILMN_2412761 | -0.10414 | 6.307542 | -3.92087 | 0.000269 | 0.015534 | 0.301062 |
| ILMN_3309468 | 0.10385  | 6.141024 | 4.500567 | 4.06E-05 | 0.00429  | 2.04898  |
| ILMN_1766195 | -0.10384 | 7.173367 | -3.717   | 0.000509 | 0.023652 | -0.28534 |
| ILMN_1738883 | -0.10366 | 6.05132  | -3.61945 | 0.000687 | 0.028753 | -0.5599  |
| ILMN_1732705 | 0.103659 | 9.413949 | 3.860027 | 0.000326 | 0.017656 | 0.12433  |
| ILMN_2150284 | 0.103456 | 7.344529 | 4.288491 | 8.20E-05 | 0.006902 | 1.397077 |
| ILMN_1764873 | -0.10329 | 5.920363 | -3.76566 | 0.000438 | 0.021343 | -0.1469  |
| ILMN_1658144 | -0.10323 | 7.851685 | -4.67203 | 2.28E-05 | 0.00293  | 2.585089 |
| ILMN_3247906 | 0.103035 | 8.076963 | 3.43884  | 0.001186 | 0.03959  | -1.05708 |
| ILMN_1688526 | -0.10265 | 11.46092 | -3.33296 | 0.001622 | 0.047632 | -1.34145 |
| ILMN_1684755 | 0.102469 | 6.098881 | 3.712874 | 0.000516 | 0.023889 | -0.29704 |
| ILMN_2327276 | 0.102459 | 10.67604 | 4.109121 | 0.000147 | 0.010521 | 0.856514 |
| ILMN_2336109 | 0.102059 | 7.715795 | 4.129083 | 0.000138 | 0.010087 | 0.916146 |
| ILMN_1682354 | 0.101986 | 6.46123  | 4.919535 | 9.78E-06 | 0.001712 | 3.371369 |
| ILMN_1789575 | -0.10181 | 6.965427 | -4.29027 | 8.15E-05 | 0.006902 | 1.402486 |
| ILMN_1722583 | 0.101468 | 7.463456 | 3.504267 | 0.000975 | 0.035332 | -0.87869 |
| ILMN_1689720 | -0.10139 | 6.837395 | -3.81371 | 0.000377 | 0.019442 | -0.00923 |
| ILMN_1745421 | -0.10136 | 7.696077 | -3.40653 | 0.001305 | 0.042165 | -1.14444 |
| ILMN_1688160 | -0.10136 | 6.519732 | -3.96819 | 0.000231 | 0.01406  | 0.439474 |
| ILMN_1688853 | 0.101327 | 7.418838 | 4.18768  | 0.000114 | 0.008774 | 1.091972 |
| ILMN_1666376 | 0.101309 | 7.528633 | 3.316112 | 0.001704 | 0.04894  | -1.38618 |
| ILMN_2396786 | -0.10131 | 7.295269 | -4.01067 | 0.000202 | 0.012866 | 0.564434 |
| ILMN_1660577 | -0.10115 | 11.44089 | -3.64364 | 0.000638 | 0.027398 | -0.49218 |
| ILMN_1660232 | 0.101072 | 9.078017 | 3.323601 | 0.001667 | 0.048418 | -1.36631 |
| ILMN_1773080 | -0.10104 | 12.90952 | -3.5396  | 0.000876 | 0.033207 | -0.78153 |
| ILMN_1714623 | 0.101015 | 9.620491 | 3.662811 | 0.000602 | 0.026324 | -0.43836 |
| ILMN_2349459 | 0.10088  | 8.499249 | 3.348595 | 0.001549 | 0.046318 | -1.2998  |
| ILMN_1722532 | -0.10088 | 7.896159 | -3.68538 | 0.000561 | 0.024936 | -0.37478 |
| ILMN_2370464 | 0.100737 | 7.256077 | 3.314346 | 0.001713 | 0.04894  | -1.39087 |
| ILMN_3249501 | 0.100615 | 6.204479 | 4.164066 | 0.000123 | 0.009166 | 1.02098  |
| ILMN_3238560 | -0.10055 | 8.406128 | -3.33944 | 0.001591 | 0.047297 | -1.32419 |
| ILMN_1782094 | -0.10027 | 7.267839 | -4.02281 | 0.000194 | 0.012553 | 0.600251 |
| ILMN_1668426 | -0.10004 | 6.007205 | -4.09431 | 0.000154 | 0.010901 | 0.812354 |
| ILMN_2095133 | 0.100021 | 8.352404 | 4.03933  | 0.000184 | 0.012201 | 0.649103 |
| ILMN_1726107 | 0.099957 | 7.107832 | 4.702159 | 2.06E-05 | 0.002748 | 2.680049 |
| ILMN_2357086 | 0.099948 | 5.587509 | 3.398261 | 0.001338 | 0.042702 | -1.1667  |
| ILMN_1818617 | 0.09988  | 6.776722 | 3.360539 | 0.001495 | 0.045325 | -1.2679  |
| ILMN_1719988 | 0.099841 | 6.098033 | 3.562142 | 0.000818 | 0.032056 | -0.71925 |
| ILMN_1677452 | 0.099558 | 8.020636 | 3.546757 | 0.000857 | 0.032877 | -0.76178 |
| ILMN_1778032 | 0.099459 | 8.78322  | 3.594463 | 0.000742 | 0.030188 | -0.62955 |
| ILMN_3246801 | 0.099006 | 6.258492 | 4.436944 | 5.02E-05 | 0.004955 | 1.852047 |
| ILMN_1753575 | 0.098891 | 6.485391 | 3.876786 | 0.000309 | 0.016928 | 0.172866 |
| ILMN_1672042 | 0.098724 | 7.272439 | 3.410424 | 0.00129  | 0.041926 | -1.13393 |
| ILMN_2380801 | 0.098702 | 6.182506 | 3.510175 | 0.000957 | 0.035078 | -0.86249 |
| ILMN_1691980 | -0.09862 | 6.551937 | -3.4983  | 0.000992 | 0.035741 | -0.89503 |
| ILMN_2344079 | 0.09857  | 6.244167 | 3.840913 | 0.000346 | 0.018403 | 0.069108 |
| ILMN_1803819 | -0.09856 | 9.694341 | -4.33494 | 7.03E-05 | 0.006282 | 1.53871  |

|              |          |          |          |          |          |          |
|--------------|----------|----------|----------|----------|----------|----------|
| ILMN_1798659 | -0.09851 | 8.113755 | -3.38289 | 0.0014   | 0.043982 | -1.20802 |
| ILMN_1694486 | -0.09839 | 6.609586 | -3.98166 | 0.000222 | 0.013735 | 0.479006 |
| ILMN_1671516 | -0.09837 | 7.946452 | -3.76597 | 0.000437 | 0.021343 | -0.14601 |
| ILMN_1660844 | -0.09829 | 8.236984 | -3.57318 | 0.000791 | 0.031501 | -0.68866 |
| ILMN_1699987 | -0.09814 | 6.630318 | -3.58789 | 0.000757 | 0.030654 | -0.64783 |
| ILMN_2098947 | 0.097789 | 6.221145 | 3.98461  | 0.000219 | 0.013631 | 0.487689 |
| ILMN_1760682 | 0.09777  | 6.726168 | 3.586475 | 0.00076  | 0.030714 | -0.65176 |
| ILMN_1729188 | 0.097728 | 6.18162  | 3.316423 | 0.001702 | 0.04894  | -1.38536 |
| ILMN_1713732 | 0.097719 | 7.408825 | 3.513201 | 0.000949 | 0.034911 | -0.85418 |
| ILMN_1687751 | 0.097687 | 6.294353 | 3.40336  | 0.001318 | 0.042415 | -1.15297 |
| ILMN_2367141 | 0.097646 | 6.138928 | 4.486616 | 4.25E-05 | 0.004454 | 2.005701 |
| ILMN_3307648 | 0.0975   | 10.48895 | 4.152398 | 0.000128 | 0.009459 | 0.985967 |
| ILMN_1811301 | 0.097492 | 7.229325 | 4.025661 | 0.000192 | 0.012526 | 0.60868  |
| ILMN_1670377 | 0.097453 | 6.558711 | 3.575401 | 0.000786 | 0.031452 | -0.68251 |
| ILMN_3194087 | -0.09724 | 6.69329  | -3.39717 | 0.001342 | 0.042762 | -1.16965 |
| ILMN_1796464 | -0.09707 | 6.732443 | -3.97836 | 0.000224 | 0.013806 | 0.46933  |
| ILMN_1730631 | 0.097025 | 7.288177 | 3.647719 | 0.00063  | 0.027218 | -0.48075 |
| ILMN_1750008 | 0.09699  | 7.387539 | 3.46873  | 0.001084 | 0.03761  | -0.97583 |
| ILMN_1721241 | 0.096955 | 6.310762 | 3.82963  | 0.000358 | 0.018776 | 0.036578 |
| ILMN_1676745 | 0.09691  | 7.911071 | 4.256767 | 9.10E-05 | 0.007431 | 1.300714 |
| ILMN_1690761 | 0.09686  | 8.819047 | 3.88623  | 0.0003   | 0.016569 | 0.200264 |
| ILMN_2052163 | -0.09682 | 9.130896 | -3.44622 | 0.00116  | 0.03905  | -1.03707 |
| ILMN_1722981 | -0.09665 | 6.391925 | -3.48958 | 0.001019 | 0.036364 | -0.9189  |
| ILMN_1844905 | -0.09641 | 6.367295 | -3.56443 | 0.000813 | 0.032053 | -0.71292 |
| ILMN_2161556 | 0.096378 | 6.790024 | 4.515731 | 3.86E-05 | 0.004141 | 2.096081 |
| ILMN_2049417 | 0.096302 | 5.960285 | 3.513685 | 0.000947 | 0.034911 | -0.85285 |
| ILMN_2156953 | -0.09594 | 7.779871 | -4.53731 | 3.59E-05 | 0.003963 | 2.163221 |
| ILMN_1694385 | 0.095808 | 11.85941 | 3.913619 | 0.000275 | 0.015619 | 0.279917 |
| ILMN_1674698 | 0.095779 | 7.212241 | 4.085547 | 0.000159 | 0.011033 | 0.786263 |
| ILMN_1698940 | 0.095768 | 13.88241 | 3.498004 | 0.000993 | 0.035741 | -0.89585 |
| ILMN_1812281 | 0.09549  | 5.969044 | 3.69548  | 0.000544 | 0.024713 | -0.34626 |
| ILMN_1713450 | 0.095469 | 9.115566 | 3.437299 | 0.001191 | 0.039657 | -1.06126 |
| ILMN_1652412 | -0.09542 | 6.524361 | -3.71248 | 0.000516 | 0.023889 | -0.29815 |
| ILMN_1792518 | -0.09535 | 8.309534 | -3.55593 | 0.000834 | 0.032408 | -0.73643 |
| ILMN_1738369 | 0.095124 | 10.02442 | 4.042827 | 0.000182 | 0.01217  | 0.659455 |
| ILMN_2222317 | -0.09496 | 7.504694 | -3.9435  | 0.00025  | 0.014894 | 0.36713  |
| ILMN_1710652 | 0.094928 | 6.22486  | 3.381187 | 0.001407 | 0.044059 | -1.21259 |
| ILMN_2290068 | -0.09481 | 5.847125 | -4.13847 | 0.000134 | 0.009854 | 0.944225 |
| ILMN_1803564 | -0.0948  | 8.155443 | -3.63507 | 0.000655 | 0.027737 | -0.51621 |
| ILMN_2402805 | 0.094731 | 7.960192 | 3.565411 | 0.00081  | 0.032031 | -0.7102  |
| ILMN_1671374 | 0.09456  | 9.250392 | 3.531371 | 0.000898 | 0.03384  | -0.80421 |
| ILMN_1688070 | 0.094556 | 7.090268 | 3.431278 | 0.001213 | 0.040162 | -1.07757 |
| ILMN_1753980 | -0.09452 | 7.043688 | -4.49934 | 4.07E-05 | 0.004294 | 2.045159 |
| ILMN_2058512 | -0.09435 | 8.228484 | -3.73553 | 0.000481 | 0.022762 | -0.23273 |
| ILMN_1698680 | 0.094204 | 6.402033 | 4.091813 | 0.000156 | 0.010944 | 0.804916 |
| ILMN_1796900 | -0.09402 | 7.310991 | -3.77876 | 0.00042  | 0.020724 | -0.10947 |
| ILMN_2363586 | -0.09381 | 10.02952 | -4.03585 | 0.000186 | 0.012254 | 0.638803 |
| ILMN_1701604 | -0.09366 | 6.390781 | -3.57887 | 0.000778 | 0.031213 | -0.67289 |
| ILMN_1684258 | -0.09362 | 13.89482 | -4.84762 | 1.25E-05 | 0.001927 | 3.141521 |
| ILMN_2412214 | -0.09358 | 5.800786 | -3.87785 | 0.000308 | 0.016904 | 0.175947 |
| ILMN_1713936 | -0.09346 | 6.452103 | -3.82175 | 0.000367 | 0.019072 | 0.013894 |
| ILMN_1769191 | 0.093225 | 12.14777 | 3.515665 | 0.000942 | 0.034873 | -0.84741 |
| ILMN_1727880 | 0.093119 | 5.588242 | 3.516194 | 0.00094  | 0.034855 | -0.84596 |
| ILMN_1663489 | -0.09301 | 7.630736 | -3.92091 | 0.000269 | 0.015534 | 0.301156 |

|              |          |          |          |          |          |          |
|--------------|----------|----------|----------|----------|----------|----------|
| ILMN_1656706 | 0.092822 | 5.463017 | 4.34745  | 6.75E-05 | 0.006091 | 1.576987 |
| ILMN_1795711 | 0.092655 | 5.933911 | 3.896968 | 0.00029  | 0.016171 | 0.231457 |
| ILMN_2147435 | -0.0926  | 8.722297 | -3.69223 | 0.00055  | 0.024798 | -0.35543 |
| ILMN_1663772 | 0.092454 | 6.030705 | 3.654784 | 0.000617 | 0.026811 | -0.46092 |
| ILMN_1840934 | 0.092274 | 6.305919 | 3.423421 | 0.001241 | 0.040845 | -1.09883 |
| ILMN_1732049 | 0.092268 | 7.307442 | 3.3788   | 0.001417 | 0.044216 | -1.219   |
| ILMN_1698404 | -0.09227 | 6.749597 | -3.39032 | 0.00137  | 0.043317 | -1.18805 |
| ILMN_3240962 | 0.092263 | 6.771073 | 3.5193   | 0.000931 | 0.034679 | -0.83742 |
| ILMN_1682062 | 0.092234 | 6.578357 | 3.546765 | 0.000857 | 0.032877 | -0.76176 |
| ILMN_2389151 | -0.0922  | 10.55855 | -3.38591 | 0.001388 | 0.043766 | -1.19992 |
| ILMN_1800447 | -0.09187 | 8.299848 | -4.12091 | 0.000142 | 0.010277 | 0.891718 |
| ILMN_1791884 | 0.091862 | 6.724049 | 3.776533 | 0.000423 | 0.020838 | -0.11583 |
| ILMN_3248057 | 0.091861 | 6.076667 | 4.950503 | 8.79E-06 | 0.001614 | 3.470677 |
| ILMN_1681798 | 0.091777 | 6.133635 | 3.65202  | 0.000622 | 0.027005 | -0.46868 |
| ILMN_2296843 | 0.091553 | 7.075077 | 3.341793 | 0.00158  | 0.047131 | -1.31793 |
| ILMN_2225887 | 0.091535 | 12.82245 | 3.81848  | 0.000371 | 0.019211 | 0.004479 |
| ILMN_1661409 | 0.091431 | 6.498988 | 3.794714 | 0.0004   | 0.020061 | -0.06377 |
| ILMN_2153485 | -0.09108 | 6.056836 | -4.26476 | 8.86E-05 | 0.007286 | 1.324969 |
| ILMN_1704398 | 0.090493 | 5.50716  | 3.766217 | 0.000437 | 0.021343 | -0.1453  |
| ILMN_1809212 | -0.09037 | 6.2086   | -3.63104 | 0.000663 | 0.028014 | -0.52748 |
| ILMN_2274531 | 0.09031  | 6.273664 | 3.929466 | 0.000262 | 0.015308 | 0.326134 |
| ILMN_1741391 | -0.09025 | 7.728987 | -3.82714 | 0.000361 | 0.018895 | 0.029415 |
| ILMN_3262348 | 0.090213 | 6.846546 | 3.628027 | 0.000669 | 0.028179 | -0.53591 |
| ILMN_1767111 | 0.089716 | 6.715365 | 3.452807 | 0.001137 | 0.038458 | -1.01917 |
| ILMN_1666019 | 0.089581 | 6.638663 | 3.670931 | 0.000587 | 0.025871 | -0.41551 |
| ILMN_2342579 | 0.089501 | 5.564237 | 3.482111 | 0.001042 | 0.036685 | -0.93932 |
| ILMN_1652819 | 0.089493 | 6.465272 | 3.467778 | 0.001087 | 0.037641 | -0.97843 |
| ILMN_1665060 | -0.08948 | 6.251033 | -3.44563 | 0.001162 | 0.03908  | -1.03865 |
| ILMN_3235168 | 0.089228 | 8.770873 | 3.321528 | 0.001677 | 0.048546 | -1.37182 |
| ILMN_1741398 | 0.089212 | 6.951261 | 3.470842 | 0.001078 | 0.037448 | -0.97008 |
| ILMN_1771238 | -0.08904 | 7.869939 | -4.01338 | 0.0002   | 0.012779 | 0.572436 |
| ILMN_2193498 | -0.08886 | 6.518431 | -3.61054 | 0.000706 | 0.029332 | -0.58475 |
| ILMN_1677305 | 0.088838 | 7.166174 | 3.452696 | 0.001138 | 0.038458 | -1.01947 |
| ILMN_1661307 | 0.088734 | 5.799211 | 3.905069 | 0.000283 | 0.015964 | 0.255021 |
| ILMN_2098616 | -0.08859 | 6.798537 | -3.33455 | 0.001614 | 0.047559 | -1.3372  |
| ILMN_1771738 | -0.08848 | 7.554359 | -3.50964 | 0.000959 | 0.035098 | -0.86396 |
| ILMN_1789535 | 0.088435 | 6.954984 | 4.221496 | 0.000102 | 0.008185 | 1.193952 |
| ILMN_3238402 | 0.088432 | 5.941097 | 3.704776 | 0.000529 | 0.0243   | -0.31997 |
| ILMN_1680703 | 0.08834  | 10.15744 | 4.640918 | 2.53E-05 | 0.003133 | 2.48725  |
| ILMN_1781001 | -0.0881  | 6.255321 | -3.34503 | 0.001565 | 0.046724 | -1.30929 |
| ILMN_1682335 | -0.0879  | 6.310612 | -3.68856 | 0.000556 | 0.024798 | -0.36582 |
| ILMN_2111918 | -0.0879  | 8.222654 | -3.30673 | 0.001751 | 0.04982  | -1.41104 |
| ILMN_1789618 | -0.08776 | 6.918948 | -3.43868 | 0.001186 | 0.03959  | -1.05751 |
| ILMN_2089340 | -0.08776 | 6.555807 | -3.5417  | 0.000871 | 0.033133 | -0.77575 |
| ILMN_1812898 | 0.087652 | 5.747437 | 3.437522 | 0.00119  | 0.039657 | -1.06065 |
| ILMN_2110496 | -0.08759 | 6.781827 | -4.29689 | 7.97E-05 | 0.006787 | 1.422636 |
| ILMN_2280731 | -0.08733 | 6.640289 | -3.64107 | 0.000643 | 0.027512 | -0.4994  |
| ILMN_1765060 | -0.08709 | 8.299388 | -3.39352 | 0.001357 | 0.043027 | -1.17946 |
| ILMN_1729167 | -0.08709 | 7.546048 | -4.40317 | 5.61E-05 | 0.005419 | 1.747976 |
| ILMN_1675055 | 0.086687 | 7.704113 | 3.919883 | 0.00027  | 0.015534 | 0.298174 |
| ILMN_1683044 | -0.08666 | 8.296903 | -3.32379 | 0.001666 | 0.048418 | -1.36582 |
| ILMN_1656145 | 0.086635 | 10.027   | 3.355723 | 0.001517 | 0.045753 | -1.28077 |
| ILMN_1688435 | -0.08655 | 6.027814 | -3.66478 | 0.000598 | 0.026232 | -0.43283 |
| ILMN_1792860 | 0.086297 | 6.301839 | 4.089169 | 0.000157 | 0.010993 | 0.797044 |



|              |          |          |          |          |          |          |
|--------------|----------|----------|----------|----------|----------|----------|
| ILMN_1672122 | 0.086186 | 5.998331 | 3.425486 | 0.001234 | 0.040665 | -1.09324 |
| ILMN_1743643 | 0.085852 | 6.202437 | 3.547171 | 0.000856 | 0.032877 | -0.76064 |
| ILMN_1688534 | 0.08559  | 7.514029 | 3.420846 | 0.001251 | 0.041004 | -1.10579 |
| ILMN_3289631 | -0.0849  | 5.915389 | -3.64618 | 0.000633 | 0.027241 | -0.48506 |
| ILMN_1706553 | 0.084638 | 9.101854 | 3.479934 | 0.001049 | 0.036887 | -0.94527 |
| ILMN_1718042 | 0.084435 | 6.34898  | 3.437144 | 0.001192 | 0.039657 | -1.06168 |
| ILMN_2081682 | 0.084345 | 7.750483 | 3.799961 | 0.000393 | 0.01988  | -0.04872 |
| ILMN_1719763 | 0.084344 | 5.881417 | 4.115445 | 0.000144 | 0.010394 | 0.875391 |
| ILMN_1725175 | -0.08425 | 6.93202  | -4.19078 | 0.000113 | 0.008743 | 1.101295 |
| ILMN_1698715 | -0.08416 | 6.978506 | -3.65688 | 0.000613 | 0.026706 | -0.45502 |
| ILMN_1739454 | -0.08364 | 7.317376 | -4.36706 | 6.33E-05 | 0.005854 | 1.637055 |
| ILMN_1685125 | 0.083364 | 6.304599 | 4.206249 | 0.000107 | 0.008446 | 1.147927 |
| ILMN_1727361 | 0.083351 | 8.569409 | 3.523255 | 0.00092  | 0.034417 | -0.82655 |
| ILMN_1893764 | 0.083263 | 6.633854 | 3.45882  | 0.001117 | 0.038166 | -1.00282 |
| ILMN_1790354 | -0.08288 | 10.19535 | -3.39948 | 0.001333 | 0.042678 | -1.16343 |
| ILMN_1673944 | 0.082811 | 10.05075 | 3.386617 | 0.001385 | 0.043715 | -1.19801 |
| ILMN_1723846 | 0.082361 | 7.409379 | 3.558781 | 0.000827 | 0.032266 | -0.72855 |
| ILMN_1722742 | -0.08234 | 6.338646 | -3.33293 | 0.001622 | 0.047632 | -1.34152 |
| ILMN_1715546 | 0.082067 | 6.674725 | 3.374367 | 0.001436 | 0.044352 | -1.23088 |
| ILMN_1828216 | 0.081858 | 6.239727 | 3.471035 | 0.001077 | 0.037448 | -0.96955 |
| ILMN_1726025 | 0.081766 | 7.314399 | 3.608685 | 0.00071  | 0.029463 | -0.58994 |
| ILMN_1651642 | 0.081748 | 6.414432 | 3.383956 | 0.001396 | 0.0439   | -1.20516 |
| ILMN_2279217 | -0.08169 | 6.027258 | -4.25998 | 9.00E-05 | 0.007371 | 1.310469 |
| ILMN_1700048 | 0.081616 | 5.846974 | 3.522609 | 0.000922 | 0.034446 | -0.82833 |
| ILMN_1742923 | 0.081258 | 6.171055 | 3.427659 | 0.001226 | 0.040519 | -1.08736 |
| ILMN_1806310 | -0.08126 | 5.994995 | -3.38214 | 0.001403 | 0.043982 | -1.21004 |
| ILMN_1706959 | 0.081203 | 8.660833 | 3.552337 | 0.000843 | 0.032579 | -0.74637 |
| ILMN_1726930 | -0.08109 | 7.077231 | -3.83218 | 0.000356 | 0.018691 | 0.043915 |
| ILMN_2141157 | -0.08103 | 6.212235 | -4.31096 | 7.61E-05 | 0.006596 | 1.46551  |
| ILMN_1793615 | -0.08099 | 5.851298 | -3.46684 | 0.001091 | 0.037673 | -0.98099 |
| ILMN_1715181 | 0.080834 | 6.690597 | 3.483711 | 0.001037 | 0.036654 | -0.93495 |
| ILMN_1678627 | 0.080782 | 5.3752   | 4.266372 | 8.81E-05 | 0.007286 | 1.329856 |
| ILMN_1692896 | 0.080746 | 6.625689 | 3.568255 | 0.000803 | 0.031902 | -0.70232 |
| ILMN_1735415 | 0.080736 | 7.315729 | 3.314233 | 0.001713 | 0.04894  | -1.39117 |
| ILMN_3297317 | 0.080418 | 13.90607 | 3.783083 | 0.000415 | 0.020575 | -0.09709 |
| ILMN_3245143 | -0.08022 | 5.815494 | -3.80461 | 0.000388 | 0.01978  | -0.03537 |
| ILMN_1776352 | -0.08009 | 7.781603 | -3.44382 | 0.001168 | 0.039253 | -1.04356 |
| ILMN_1774281 | -0.08001 | 6.209842 | -3.33091 | 0.001632 | 0.047848 | -1.34688 |
| ILMN_2197128 | 0.079973 | 6.431742 | 3.330231 | 0.001635 | 0.047848 | -1.3487  |
| ILMN_2177460 | 0.079857 | 6.285313 | 3.316432 | 0.001702 | 0.04894  | -1.38534 |
| ILMN_1769503 | -0.07962 | 5.950628 | -3.33759 | 0.0016   | 0.047389 | -1.32912 |
| ILMN_1698725 | 0.079448 | 6.157744 | 3.917272 | 0.000272 | 0.015534 | 0.290564 |
| ILMN_3245893 | -0.0793  | 6.436412 | -3.46023 | 0.001112 | 0.038043 | -0.99897 |
| ILMN_1662334 | 0.079128 | 9.877035 | 4.099661 | 0.000152 | 0.010781 | 0.828299 |
| ILMN_2366714 | -0.07908 | 7.945501 | -3.51268 | 0.00095  | 0.034911 | -0.8556  |
| ILMN_2049642 | -0.07889 | 10.4411  | -3.91907 | 0.00027  | 0.015534 | 0.2958   |
| ILMN_1718898 | 0.078805 | 6.109315 | 3.590075 | 0.000752 | 0.030491 | -0.64176 |
| ILMN_1773716 | 0.078737 | 7.94473  | 3.423365 | 0.001242 | 0.040845 | -1.09898 |
| ILMN_2134224 | 0.078722 | 6.828101 | 3.848606 | 0.000338 | 0.018131 | 0.091317 |
| ILMN_1782730 | 0.078428 | 6.297205 | 4.27458  | 8.58E-05 | 0.007145 | 1.354782 |
| ILMN_1692486 | 0.078346 | 8.511366 | 3.801548 | 0.000391 | 0.019839 | -0.04417 |
| ILMN_1722771 | -0.07816 | 5.778356 | -3.54389 | 0.000865 | 0.033089 | -0.76969 |
| ILMN_3268590 | 0.077823 | 5.775323 | 3.516837 | 0.000938 | 0.034825 | -0.84419 |
| ILMN_1721628 | 0.077529 | 5.548135 | 3.353768 | 0.001526 | 0.045896 | -1.28599 |

|              |          |          |          |          |          |          |
|--------------|----------|----------|----------|----------|----------|----------|
| ILMN_2388965 | 0.077408 | 5.253054 | 4.08695  | 0.000158 | 0.011033 | 0.790439 |
| ILMN_2124425 | 0.077408 | 5.376862 | 3.615942 | 0.000695 | 0.028957 | -0.56968 |
| ILMN_1676159 | -0.07724 | 9.37641  | -3.31593 | 0.001705 | 0.04894  | -1.38667 |
| ILMN_2390586 | -0.07637 | 7.047253 | -3.81925 | 0.00037  | 0.019194 | 0.006685 |
| ILMN_1809094 | -0.07597 | 6.7153   | -3.46461 | 0.001098 | 0.037789 | -0.98707 |
| ILMN_1713454 | 0.07573  | 6.15932  | 3.432302 | 0.001209 | 0.040078 | -1.07479 |
| ILMN_1803094 | 0.075213 | 6.214764 | 3.5056   | 0.000971 | 0.035265 | -0.87504 |
| ILMN_1696826 | 0.074385 | 5.909971 | 4.184926 | 0.000115 | 0.008798 | 1.083682 |
| ILMN_1737818 | 0.074303 | 7.595981 | 3.330799 | 0.001632 | 0.047848 | -1.34719 |
| ILMN_1806782 | 0.074235 | 6.27442  | 3.377609 | 0.001422 | 0.044289 | -1.22219 |
| ILMN_1705330 | -0.0737  | 6.392187 | -3.34973 | 0.001544 | 0.046203 | -1.29675 |
| ILMN_1761181 | 0.073293 | 5.857509 | 3.562204 | 0.000818 | 0.032056 | -0.71908 |
| ILMN_1792242 | 0.073257 | 5.673458 | 3.315421 | 0.001707 | 0.04894  | -1.38802 |
| ILMN_1712751 | 0.073132 | 7.449822 | 3.354747 | 0.001521 | 0.045804 | -1.28337 |
| ILMN_1801395 | -0.07282 | 5.985178 | -3.33039 | 0.001634 | 0.047848 | -1.34828 |
| ILMN_1699836 | 0.072332 | 5.569219 | 3.441598 | 0.001176 | 0.039438 | -1.0496  |
| ILMN_1715654 | 0.072229 | 6.159278 | 3.493423 | 0.001007 | 0.036049 | -0.9084  |
| ILMN_1748607 | -0.07213 | 5.781067 | -3.52367 | 0.000919 | 0.03441  | -0.82539 |
| ILMN_1713247 | -0.07186 | 5.57309  | -3.48722 | 0.001026 | 0.036495 | -0.92537 |
| ILMN_1689651 | 0.07114  | 5.329057 | 3.727953 | 0.000492 | 0.023093 | -0.25427 |
| ILMN_1799669 | -0.07091 | 6.169469 | -3.60346 | 0.000722 | 0.029718 | -0.60451 |
| ILMN_1676594 | -0.07084 | 5.782597 | -3.51472 | 0.000944 | 0.034911 | -0.85001 |
| ILMN_1789955 | -0.07046 | 5.498019 | -3.40629 | 0.001306 | 0.042165 | -1.14506 |
| ILMN_2410905 | -0.07006 | 5.267522 | -3.38672 | 0.001384 | 0.043715 | -1.19773 |
| ILMN_1696767 | 0.069905 | 5.26613  | 3.404329 | 0.001314 | 0.042371 | -1.15036 |
| ILMN_1815570 | 0.069839 | 6.374613 | 3.476571 | 0.001059 | 0.037034 | -0.95445 |
| ILMN_1767441 | 0.069765 | 6.13581  | 3.68844  | 0.000556 | 0.024798 | -0.36614 |
| ILMN_2209766 | -0.06973 | 6.632917 | -3.48457 | 0.001034 | 0.036639 | -0.9326  |
| ILMN_3300358 | 0.069564 | 6.250778 | 3.482501 | 0.00104  | 0.036679 | -0.93826 |
| ILMN_1728802 | -0.06932 | 5.97848  | -3.48819 | 0.001023 | 0.036431 | -0.92272 |
| ILMN_1887128 | -0.06927 | 6.128285 | -3.8509  | 0.000335 | 0.018029 | 0.097944 |
| ILMN_1759312 | -0.06919 | 5.296898 | -3.40259 | 0.001321 | 0.042432 | -1.15504 |
| ILMN_2085446 | 0.06817  | 6.516636 | 3.3381   | 0.001598 | 0.047389 | -1.32776 |
| ILMN_1661002 | -0.06753 | 9.235879 | -3.52587 | 0.000913 | 0.034221 | -0.81936 |
| ILMN_1651498 | 0.066353 | 5.48707  | 3.320379 | 0.001683 | 0.048567 | -1.37487 |
| ILMN_3225014 | 0.066123 | 5.747072 | 3.42179  | 0.001247 | 0.040958 | -1.10324 |
| ILMN_1885908 | -0.06612 | 5.936269 | -3.58262 | 0.000769 | 0.031004 | -0.66247 |
| ILMN_1761844 | 0.066018 | 8.75912  | 3.485764 | 0.00103  | 0.036546 | -0.92934 |
| ILMN_1693319 | -0.06332 | 5.331141 | -3.46317 | 0.001103 | 0.037822 | -0.99097 |
| ILMN_2338849 | -0.06286 | 5.81064  | -3.59854 | 0.000733 | 0.030029 | -0.61822 |
| ILMN_1759801 | 0.062286 | 7.855688 | 3.456994 | 0.001123 | 0.038324 | -1.00778 |
| ILMN_2038773 | -0.06124 | 14.04246 | -3.33314 | 0.001621 | 0.047632 | -1.34095 |
| ILMN_2084912 | -0.05984 | 5.261935 | -3.4399  | 0.001182 | 0.03959  | -1.05419 |
| ILMN_3211262 | 0.059778 | 5.588309 | 3.351735 | 0.001535 | 0.046067 | -1.29142 |
| ILMN_1673042 | 0.059436 | 6.00835  | 3.618257 | 0.00069  | 0.028788 | -0.56322 |
| ILMN_2331501 | -0.0583  | 14.14271 | -3.45588 | 0.001127 | 0.038349 | -1.01083 |
| ILMN_1736234 | 0.055856 | 8.677606 | 3.471953 | 0.001074 | 0.037399 | -0.96705 |

**Supplementary Table S4. Genes showing significant concentration-dependent associations with levels of HPV16 E7 protein in the W12 clones, after exclusion of known p53 targets.**

|              | logFC        | AveExpr     | t            | P.Value     | adj.P.Val   | B            |
|--------------|--------------|-------------|--------------|-------------|-------------|--------------|
| ILMN_2133205 | -0.69081606  | 7.99216877  | -5.434234286 | 1.62786E-06 | 0.000660259 | 5.034164943  |
| ILMN_1739513 | 0.604786058  | 7.219707756 | 8.73629807   | 1.22083E-11 | 4.20894E-07 | 16.21004505  |
| ILMN_1744604 | -0.586736389 | 7.452409232 | -6.368581534 | 5.80282E-08 | 6.21511E-05 | 8.197194939  |
| ILMN_2391861 | -0.58146284  | 8.151042478 | -4.662890606 | 2.34913E-05 | 0.002999582 | 2.511430461  |
| ILMN_1725139 | 0.565743007  | 6.326501386 | 7.51379229   | 9.38235E-10 | 6.46932E-06 | 12.10954146  |
| ILMN_1773006 | -0.55724265  | 10.33058279 | -3.284381713 | 0.001869435 | 0.044571665 | -1.564808264 |
| ILMN_1705750 | -0.441252203 | 9.719860872 | -5.369658152 | 2.0432E-06  | 0.000741489 | 4.818896084  |
| ILMN_1668134 | -0.427845205 | 6.914500691 | -3.333975919 | 0.001617036 | 0.040662965 | -1.431979315 |
| ILMN_1788874 | 0.411575486  | 7.706951017 | 4.32059777   | 7.37427E-05 | 0.006355887 | 1.4361046    |
| ILMN_1705080 | -0.40105173  | 8.187943267 | -4.27216586  | 8.64784E-05 | 0.006982696 | 1.286748685  |
| ILMN_1772627 | -0.38929497  | 8.074500632 | -4.808453546 | 1.43184E-05 | 0.002349659 | 2.97812617   |
| ILMN_1762255 | -0.387429166 | 7.106343715 | -3.230938793 | 0.002182939 | 0.04951251  | -1.706528162 |
| ILMN_1812403 | -0.371523466 | 9.949196794 | -4.952175936 | 8.74355E-06 | 0.001684037 | 3.443709792  |
| ILMN_1682015 | 0.370871001  | 8.023019495 | 3.887879387  | 0.000298325 | 0.015373789 | 0.130088999  |
| ILMN_1673639 | -0.367455572 | 7.225538082 | -4.707037288 | 2.02263E-05 | 0.002834636 | 2.652426128  |
| ILMN_1671478 | -0.365558346 | 8.875750533 | -5.909231965 | 3.01483E-07 | 0.000206424 | 6.633195965  |
| ILMN_2072178 | 0.336319958  | 7.401153344 | 4.91526345   | 9.92829E-06 | 0.001858065 | 3.323705116  |
| ILMN_1775814 | -0.330473923 | 8.011236094 | -3.611781457 | 0.000703495 | 0.024698252 | -0.665710356 |
| ILMN_3249032 | 0.32352468   | 7.755068973 | 4.622502857  | 2.69274E-05 | 0.00328038  | 2.382872901  |
| ILMN_1699989 | -0.322204513 | 8.280025947 | -4.836820403 | 1.29946E-05 | 0.002206412 | 3.069657724  |
| ILMN_1754241 | 0.320600998  | 7.183668741 | 3.920536532  | 0.000269039 | 0.014425195 | 0.22627846   |
| ILMN_1705107 | -0.309738213 | 8.067200163 | -3.823755691 | 0.000365025 | 0.017052307 | -0.057557178 |
| ILMN_1790227 | -0.309427044 | 8.273253594 | -3.76294215  | 0.000441397 | 0.018973996 | -0.233977083 |
| ILMN_1693338 | 0.303946945  | 8.093768737 | 3.309335964  | 0.001738105 | 0.042498505 | -1.498129471 |
| ILMN_1744765 | -0.301370098 | 11.11599086 | -3.415095266 | 0.001272501 | 0.034790444 | -1.212054595 |
| ILMN_2242463 | 0.295329948  | 10.18413434 | 5.304838316  | 2.56523E-06 | 0.000820235 | 4.603434503  |
| ILMN_2096372 | -0.294100034 | 6.843430779 | -3.445070773 | 0.001163826 | 0.033105678 | -1.129969727 |
| ILMN_1690017 | -0.290045091 | 8.585351717 | -3.297978687 | 0.001796754 | 0.043525466 | -1.528516101 |
| ILMN_1805665 | -0.282212258 | 9.899023581 | -4.772988676 | 1.6161E-05  | 0.002454475 | 2.86395239   |
| ILMN_1737561 | -0.280160022 | 7.754603778 | -4.796294912 | 1.49256E-05 | 0.002349659 | 2.938950315  |
| ILMN_2138765 | 0.27958152   | 7.772093849 | 6.15026449   | 1.27172E-07 | 0.000101962 | 7.452398073  |
| ILMN_2390919 | -0.269610984 | 7.823265094 | -4.84969472  | 1.24341E-05 | 0.002198351 | 3.111259521  |
| ILMN_2304512 | 0.263785142  | 8.426434592 | 3.512193909  | 0.000951626 | 0.029398089 | -0.944599546 |
| ILMN_2376723 | -0.257203244 | 9.075358902 | -5.290871944 | 2.69391E-06 | 0.000839969 | 4.557095056  |
| ILMN_1651496 | -0.255719192 | 9.321274314 | -3.474688831 | 0.001065162 | 0.03116883  | -1.048438888 |
| ILMN_1696347 | 0.254268017  | 9.758518681 | 4.311321696  | 7.60315E-05 | 0.006440445 | 1.407441359  |
| ILMN_1706015 | -0.251978895 | 7.10022439  | -3.335179203 | 0.001611333 | 0.040600074 | -1.428741032 |
| ILMN_1711087 | -0.245690545 | 8.940669647 | -5.58841911  | 9.44144E-07 | 0.000438736 | 5.550430731  |
| ILMN_1774602 | -0.245031785 | 8.368134171 | -4.834020371 | 1.31197E-05 | 0.002206412 | 3.060614701  |
| ILMN_1808590 | 0.244657643  | 7.18808754  | 3.810764404  | 0.000380188 | 0.017435104 | -0.095372325 |
| ILMN_1660067 | 0.239113589  | 7.137711934 | 4.834179622  | 1.31125E-05 | 0.002206412 | 3.061128974  |
| ILMN_1667966 | -0.237567824 | 7.760318553 | -5.395071302 | 1.86853E-06 | 0.000715772 | 4.903541006  |
| ILMN_1760990 | -0.237268838 | 6.710186996 | -5.289764156 | 2.70439E-06 | 0.000839969 | 4.553420812  |
| ILMN_1798006 | -0.234468968 | 7.928235922 | -3.734576189 | 0.000482068 | 0.019832651 | -0.315741353 |
| ILMN_3244348 | 0.232542783  | 8.046508909 | 6.477717038  | 3.91743E-08 | 5.35713E-05 | 8.570171447  |
| ILMN_1751086 | 0.230310703  | 9.493877108 | 5.759145075  | 5.14908E-07 | 0.000306068 | 6.125371429  |
| ILMN_3227023 | -0.23001724  | 9.465506347 | -5.6941025   | 6.48928E-07 | 0.000366761 | 5.905962054  |
| ILMN_3234089 | -0.228138307 | 7.081691467 | -4.222943136 | 0.000101606 | 0.007390097 | 1.135726128  |
| ILMN_1743103 | -0.225103715 | 10.09195226 | -4.85508309  | 1.22067E-05 | 0.002169262 | 3.12868241   |
| ILMN_3242586 | -0.225102888 | 6.789435012 | -3.673373877 | 0.00058243  | 0.022310943 | -0.490990257 |

|              |              |             |              |             |             |              |
|--------------|--------------|-------------|--------------|-------------|-------------|--------------|
| ILMN_1800130 | -0.224479568 | 7.260116812 | -4.682044429 | 2.20158E-05 | 0.002875057 | 2.572544029  |
| ILMN_1799098 | -0.224440989 | 10.47357299 | -6.664318918 | 1.99966E-08 | 3.44702E-05 | 9.208464827  |
| ILMN_1800317 | -0.22350407  | 6.100467508 | -4.73141825  | 1.86183E-05 | 0.002685707 | 2.730500877  |
| ILMN_3305614 | -0.223368093 | 6.399203071 | -3.957931005 | 0.000238909 | 0.013337338 | 0.336927568  |
| ILMN_1695945 | -0.221304142 | 6.886069381 | -6.481233056 | 3.86814E-08 | 5.35713E-05 | 8.582192824  |
| ILMN_1790100 | 0.219813055  | 8.226172551 | 5.730934118  | 5.69281E-07 | 0.000327109 | 6.030153859  |
| ILMN_2160209 | 0.219490692  | 6.731097227 | 4.859041812  | 1.20422E-05 | 0.002151118 | 3.141486766  |
| ILMN_1699651 | 0.218890296  | 6.608252975 | 3.239463627  | 0.002129806 | 0.048562949 | -1.684021809 |
| ILMN_1700583 | 0.218227029  | 9.328274748 | 3.818622526  | 0.000370945 | 0.017189122 | -0.072507039 |
| ILMN_1721876 | -0.216364977 | 8.700419317 | -5.122888993 | 4.84206E-06 | 0.001192391 | 4.002271707  |
| ILMN_1777233 | 0.215540938  | 8.912187296 | 6.414196826  | 4.92422E-08 | 5.65891E-05 | 8.353046659  |
| ILMN_1856480 | -0.214646444 | 7.171697048 | -3.953969429 | 0.00024194  | 0.013410175 | 0.325180073  |
| ILMN_1749096 | 0.212726388  | 6.532684661 | 3.974450438  | 0.000226663 | 0.01305066  | 0.385977694  |
| ILMN_1708934 | -0.21218095  | 11.66936382 | -4.556297003 | 3.3652E-05  | 0.003769727 | 2.173058244  |
| ILMN_1693471 | 0.211880179  | 8.40287487  | 3.659052725  | 0.000608656 | 0.022886172 | -0.531764293 |
| ILMN_1781285 | -0.207384102 | 10.9608232  | -3.970814137 | 0.000229305 | 0.013127837 | 0.375171805  |
| ILMN_1711069 | -0.207365644 | 9.757086349 | -4.365354615 | 6.36097E-05 | 0.005842125 | 1.574779422  |
| ILMN_2095610 | -0.205748074 | 9.971736434 | -6.183609185 | 1.12826E-07 | 9.26141E-05 | 7.566011811  |
| ILMN_1810725 | -0.20454778  | 7.339040559 | -4.126050766 | 0.000139254 | 0.009322172 | 0.840803468  |
| ILMN_2186983 | -0.203337649 | 10.29542032 | -5.879732506 | 3.3498E-07  | 0.000217901 | 6.533227358  |
| ILMN_1678655 | -0.202616789 | 9.884597969 | -3.297783238 | 0.00179778  | 0.043525466 | -1.529038451 |
| ILMN_3224926 | 0.202020378  | 8.871704037 | 4.835870289  | 1.30369E-05 | 0.002206412 | 3.066589024  |
| ILMN_3242004 | -0.20152848  | 9.102102216 | -5.679996016 | 6.82279E-07 | 0.000372997 | 5.858434477  |
| ILMN_3236858 | -0.201080371 | 6.435354039 | -3.828722864 | 0.000359383 | 0.016949503 | -0.04308058  |
| ILMN_1739450 | -0.200962318 | 9.157352887 | -6.319265215 | 6.92932E-08 | 6.63598E-05 | 8.028776021  |
| ILMN_1772910 | -0.199887607 | 8.398031431 | -4.433315319 | 5.07675E-05 | 0.004902692 | 1.786510553  |
| ILMN_3306730 | 0.198533654  | 8.639005981 | 4.871313943  | 1.1546E-05  | 0.002095043 | 3.181202652  |
| ILMN_1675616 | 0.197984324  | 6.875555063 | 4.674844139  | 2.25595E-05 | 0.002934946 | 2.549559417  |
| ILMN_1657766 | -0.195994708 | 10.09657349 | -4.696233253 | 2.09816E-05 | 0.002858752 | 2.617875261  |
| ILMN_1793017 | -0.195238893 | 7.235809229 | -6.339357904 | 6.44619E-08 | 6.34968E-05 | 8.097383583  |
| ILMN_1696270 | -0.195203211 | 8.109972371 | -6.4444893   | 4.41541E-08 | 5.48717E-05 | 8.456579329  |
| ILMN_2413816 | 0.194739056  | 6.652781464 | 4.318761034  | 7.41905E-05 | 0.006378536 | 1.430426911  |
| ILMN_1749109 | -0.192449327 | 11.15245326 | -6.469158372 | 4.04007E-08 | 5.35713E-05 | 8.54091029   |
| ILMN_1791580 | -0.191163585 | 7.516766911 | -4.139493976 | 0.000133319 | 0.009067373 | 0.8815308    |
| ILMN_1792679 | 0.190884687  | 7.392166643 | 5.616247963  | 8.55478E-07 | 0.000409631 | 5.643927145  |
| ILMN_1672908 | -0.190029403 | 6.931672228 | -3.88584416  | 0.000300249 | 0.015384685 | 0.124108179  |
| ILMN_1788192 | -0.189931105 | 6.735081722 | -4.171442236 | 0.000120181 | 0.008435971 | 0.97857037   |
| ILMN_1729217 | -0.189654983 | 6.337149941 | -3.90234596  | 0.000284991 | 0.014932161 | 0.172648018  |
| ILMN_1731640 | -0.188879701 | 8.258373683 | -3.583765928 | 0.000766212 | 0.025766729 | -0.744623495 |
| ILMN_1686555 | -0.188776926 | 6.82099883  | -5.603471483 | 8.95111E-07 | 0.000422737 | 5.600990798  |
| ILMN_1799106 | 0.188677261  | 7.097389027 | 5.035170511  | 6.56441E-06 | 0.001468809 | 3.714552519  |
| ILMN_1685540 | 0.188063075  | 7.832534157 | 6.99285609   | 6.11633E-09 | 1.81181E-05 | 10.33249881  |
| ILMN_1775114 | -0.18800111  | 7.008211087 | -4.759288223 | 1.69334E-05 | 0.002505568 | 2.819924898  |
| ILMN_2355559 | -0.187680333 | 11.20146333 | -5.519534969 | 1.20472E-06 | 0.000512766 | 5.31940396   |
| ILMN_1678669 | 0.186617129  | 7.898199559 | 4.439089744  | 4.98012E-05 | 0.004863867 | 1.804563809  |
| ILMN_2365686 | 0.185660958  | 9.254504264 | 4.583386116  | 3.07222E-05 | 0.003614948 | 2.258765943  |
| ILMN_1741755 | -0.184704068 | 9.953249213 | -5.348926663 | 2.19758E-06 | 0.000773098 | 4.749915185  |
| ILMN_1709307 | -0.184410067 | 7.171161366 | -3.706517537 | 0.000525825 | 0.020981412 | -0.396284954 |
| ILMN_2180371 | 0.183056046  | 7.825553085 | 4.364051922  | 6.38845E-05 | 0.005842125 | 1.570734456  |
| ILMN_1778360 | -0.181926162 | 10.85475199 | -4.375464462 | 6.15161E-05 | 0.005670668 | 1.606188858  |
| ILMN_1676361 | -0.181459616 | 7.368993026 | -5.379348197 | 1.97477E-06 | 0.00072428  | 4.851160093  |
| ILMN_3248857 | 0.180973672  | 6.346805873 | 6.936004619  | 7.50766E-09 | 1.84881E-05 | 10.13806579  |
| ILMN_1692938 | 0.180920967  | 8.625168167 | 5.423327133  | 1.69162E-06 | 0.000678144 | 4.997763526  |
| ILMN_1669433 | -0.180796705 | 8.76455444  | -5.322499946 | 2.41117E-06 | 0.000807064 | 4.662078245  |

|              |              |             |              |             |             |              |
|--------------|--------------|-------------|--------------|-------------|-------------|--------------|
| ILMN_1787265 | -0.179947208 | 8.776492154 | -4.124454541 | 0.000139975 | 0.009352316 | 0.835971736  |
| ILMN_1886515 | -0.179759802 | 8.070173077 | -4.52876612  | 3.69091E-05 | 0.003964103 | 2.086157012  |
| ILMN_2342437 | 0.179461728  | 7.164943946 | 5.106722261  | 5.12191E-06 | 0.001243056 | 3.94913595   |
| ILMN_2330307 | 0.179245561  | 7.789457065 | 4.218576517  | 0.000103066 | 0.00745919  | 1.122367006  |
| ILMN_2125346 | -0.178228373 | 6.785924135 | -3.740125974 | 0.000473837 | 0.019681937 | -0.299770861 |
| ILMN_3251691 | 0.177896819  | 7.470628025 | 4.456042621  | 4.70667E-05 | 0.004730816 | 1.857621624  |
| ILMN_1711994 | 0.17738201   | 7.334313561 | 5.234759307  | 3.27838E-06 | 0.000941879 | 4.371232742  |
| ILMN_2390974 | -0.176315262 | 9.158101172 | -5.108661255 | 5.08752E-06 | 0.001243056 | 3.95550637   |
| ILMN_1704537 | 0.174733415  | 9.658633574 | 3.558422992  | 0.000827522 | 0.026892586 | -0.815702295 |
| ILMN_2376050 | -0.174418352 | 8.043913138 | -3.957664218 | 0.000239112 | 0.013337338 | 0.336136263  |
| ILMN_1692026 | 0.174249718  | 7.547477453 | 7.133646458  | 3.68248E-09 | 1.58696E-05 | 10.81370447  |
| ILMN_1749118 | 0.173849678  | 6.735765352 | 3.493217695  | 0.001007547 | 0.030416973 | -0.997221387 |
| ILMN_1724139 | 0.172771062  | 11.04195193 | 5.130281889  | 4.71916E-06 | 0.001178969 | 4.02658611   |
| ILMN_2326712 | 0.172670154  | 7.108977109 | 4.557986414  | 3.34616E-05 | 0.003769727 | 2.17839761   |
| ILMN_1809695 | -0.172032373 | 8.243369376 | -4.09577975  | 0.000153572 | 0.010008618 | 0.749325765  |
| ILMN_1698732 | 0.171963635  | 9.84195521  | 4.398668037  | 5.69618E-05 | 0.005349064 | 1.678394828  |
| ILMN_1664861 | -0.171785172 | 10.51661568 | -4.256030437 | 9.11785E-05 | 0.007161366 | 1.237156045  |
| ILMN_3201453 | 0.171559671  | 9.408963236 | 4.976451759  | 8.0414E-06  | 0.001575201 | 3.522786754  |
| ILMN_2131177 | 0.170944003  | 6.861965588 | 3.57975505   | 0.000775617 | 0.025860693 | -0.755892192 |
| ILMN_1811195 | -0.170777634 | 6.387586903 | -6.000661858 | 2.17402E-07 | 0.000162938 | 6.943470744  |
| ILMN_1732609 | -0.170355087 | 7.328232052 | -4.307224194 | 7.70644E-05 | 0.006480173 | 1.394788601  |
| ILMN_1903021 | -0.170261062 | 6.660382587 | -4.928029357 | 9.50171E-06 | 0.001809839 | 3.365175324  |
| ILMN_1754842 | -0.170090714 | 7.573755813 | -5.858034943 | 3.61955E-07 | 0.000231088 | 6.459744675  |
| ILMN_1723412 | -0.169892927 | 8.099925286 | -4.098267393 | 0.000152344 | 0.00996623  | 0.756831168  |
| ILMN_1737283 | -0.169839612 | 8.270081685 | -3.433751064 | 0.001203785 | 0.033496112 | -1.161018718 |
| ILMN_1797822 | -0.169819001 | 7.703848732 | -3.598168462 | 0.00073333  | 0.025231822 | -0.704099099 |
| ILMN_2087941 | -0.169218725 | 7.976438825 | -4.338841335 | 6.94355E-05 | 0.006169738 | 1.492555873  |
| ILMN_1838942 | 0.168967176  | 7.333424158 | 3.62623211   | 0.000673096 | 0.024223018 | -0.624868682 |
| ILMN_2151281 | -0.168798031 | 7.544568822 | -3.640881204 | 0.000643565 | 0.023684694 | -0.583371392 |
| ILMN_1673522 | 0.168705945  | 8.374232556 | 6.962167447  | 6.83186E-09 | 1.81181E-05 | 10.22755008  |
| ILMN_1685413 | 0.168321935  | 9.058596142 | 5.340975739  | 2.25979E-06 | 0.000786956 | 4.723476787  |
| ILMN_1700310 | -0.16805555  | 6.956644075 | -3.32054578  | 0.001681997 | 0.041479641 | -1.468072959 |
| ILMN_1800091 | 0.167428076  | 6.191857456 | 6.115846563  | 1.43886E-07 | 0.000112741 | 7.335191582  |
| ILMN_1789775 | 0.167217551  | 8.644514677 | 4.804303276  | 1.45229E-05 | 0.002349659 | 2.964749906  |
| ILMN_1801077 | 0.167032943  | 6.694602711 | 6.731630223  | 1.56876E-08 | 3.0047E-05  | 9.438796451  |
| ILMN_1673543 | 0.167020085  | 8.339836748 | 6.300341597  | 7.4173E-08  | 6.91132E-05 | 7.964174301  |
| ILMN_3305273 | 0.166487504  | 7.434980595 | 6.485870956  | 3.80406E-08 | 5.35713E-05 | 8.598050381  |
| ILMN_2404065 | -0.165148456 | 9.856242498 | -6.211028258 | 1.02246E-07 | 8.81259E-05 | 7.659478477  |
| ILMN_2219466 | 0.164879559  | 6.618041515 | 4.044640504  | 0.000181063 | 0.011207062 | 0.595523839  |
| ILMN_1706051 | -0.164812187 | 6.646428759 | -3.407280997 | 0.001302379 | 0.035350425 | -1.23338142  |
| ILMN_1673673 | 0.16441195   | 7.43933552  | 4.492771099  | 4.16356E-05 | 0.004323582 | 1.972855084  |
| ILMN_2217935 | 0.164017365  | 8.484240684 | 6.213782351  | 1.0124E-07  | 8.81259E-05 | 7.668868738  |
| ILMN_1738955 | -0.163501544 | 8.396592065 | -5.784860585 | 4.69851E-07 | 0.000284185 | 6.212234602  |
| ILMN_1682402 | 0.163494202  | 6.554807944 | 7.152685197  | 3.43839E-09 | 1.58696E-05 | 10.87873602  |
| ILMN_1679093 | -0.163369146 | 9.14661576  | -4.280939092 | 8.40226E-05 | 0.006880673 | 1.313748584  |
| ILMN_3200421 | 0.163289431  | 7.3358073   | 5.135903179  | 4.62778E-06 | 0.001173141 | 4.045080537  |
| ILMN_1781400 | -0.163199598 | 6.351035103 | -3.341210803 | 0.001583034 | 0.040177859 | -1.412497766 |
| ILMN_2209578 | -0.162928791 | 8.965182798 | -6.483652944 | 3.83457E-08 | 5.35713E-05 | 8.590466661  |
| ILMN_3238707 | 0.162412664  | 7.420619876 | 5.662761382  | 7.2534E-07  | 0.000373236 | 5.800396698  |
| ILMN_2128967 | -0.161538612 | 9.231967674 | -3.882916224 | 0.000303037 | 0.015432062 | 0.115506859  |
| ILMN_1769451 | 0.161289634  | 8.506642461 | 6.994714177  | 6.0755E-09  | 1.81181E-05 | 10.33885251  |
| ILMN_2401878 | 0.161225706  | 8.209210494 | 4.839888051  | 1.28588E-05 | 0.002206412 | 3.079567074  |
| ILMN_3242883 | -0.161205999 | 8.583161327 | -5.667177408 | 7.14057E-07 | 0.000372997 | 5.815264617  |
| ILMN_1781386 | -0.161096662 | 7.357152482 | -3.757414509 | 0.000449054 | 0.019184124 | -0.249936876 |

|              |              |             |              |             |             |              |
|--------------|--------------|-------------|--------------|-------------|-------------|--------------|
| ILMN_1683450 | 0.160862649  | 9.802312178 | 5.193306531  | 3.78897E-06 | 0.001045028 | 4.234263393  |
| ILMN_2134039 | 0.159433681  | 9.220499199 | 3.58571311   | 0.000761685 | 0.025703058 | -0.739150192 |
| ILMN_1658426 | -0.158942288 | 6.566176358 | -3.84896685  | 0.000337245 | 0.016315041 | 0.016022569  |
| ILMN_1756541 | -0.15859699  | 8.567317396 | -5.037758648 | 6.50585E-06 | 0.001468809 | 3.723020664  |
| ILMN_1772036 | 0.158129245  | 6.536795991 | 4.559152045  | 3.33308E-05 | 0.003769727 | 2.182082023  |
| ILMN_1748352 | -0.157393569 | 11.4101258  | -3.797205911 | 0.000396658 | 0.017952992 | -0.134765049 |
| ILMN_1775405 | -0.15729259  | 9.58175858  | -4.543559767 | 3.51224E-05 | 0.003881022 | 2.132827361  |
| ILMN_1778543 | 0.1572839    | 8.784347679 | 4.260866042  | 8.97444E-05 | 0.007096396 | 1.252009579  |
| ILMN_2214678 | -0.157210629 | 7.753443547 | -3.245479044 | 0.00209305  | 0.048074616 | -1.668117636 |
| ILMN_2072622 | 0.157172039  | 9.120219576 | 4.198378494  | 0.000110089 | 0.007858011 | 1.060656016  |
| ILMN_2357134 | 0.156517706  | 7.806796626 | 3.527336874  | 0.000909139 | 0.028592897 | -0.90248659  |
| ILMN_2401873 | 0.156332014  | 8.387227745 | 4.104447232  | 0.000149333 | 0.009825188 | 0.775485649  |
| ILMN_1671404 | 0.156070665  | 9.585143281 | 3.870028606  | 0.000315609 | 0.015838348 | 0.077687462  |
| ILMN_1715684 | -0.155924291 | 9.932006939 | -3.560712266 | 0.000821797 | 0.026753799 | -0.809293661 |
| ILMN_1655622 | 0.155651196  | 9.877113686 | 4.797424893  | 1.48681E-05 | 0.002349659 | 2.942589739  |
| ILMN_1712888 | -0.15557024  | 10.95199369 | -3.353099236 | 0.001528629 | 0.03929978  | -1.380428388 |
| ILMN_1802205 | -0.15556641  | 9.479562597 | -3.819331257 | 0.000370122 | 0.017174075 | -0.070443562 |
| ILMN_3235404 | 0.155366503  | 7.050826139 | 5.3826492    | 1.95198E-06 | 0.00072428  | 4.862154273  |
| ILMN_2121816 | -0.15490423  | 6.828962555 | -5.928019578 | 2.81907E-07 | 0.000201694 | 6.696900848  |
| ILMN_1663866 | -0.154716466 | 12.1605902  | -3.517276977 | 0.000937157 | 0.02913385  | -0.930475332 |
| ILMN_1716026 | -0.154543997 | 7.359713491 | -5.030641181 | 6.66812E-06 | 0.001468809 | 3.699736121  |
| ILMN_1678922 | -0.154325442 | 8.855589712 | -4.427099176 | 5.18282E-05 | 0.004991147 | 1.76708721   |
| ILMN_2413898 | 0.153063577  | 8.123873246 | 4.091501176  | 0.000155708 | 0.010071639 | 0.736422113  |
| ILMN_1669703 | -0.153029137 | 8.590866258 | -5.211281143 | 3.55859E-06 | 0.000997446 | 4.293619832  |
| ILMN_1682038 | 0.152626201  | 8.37477388  | 5.274187959  | 2.85601E-06 | 0.000871363 | 4.501779322  |
| ILMN_1685580 | -0.152486775 | 7.695230185 | -5.923337273 | 2.86664E-07 | 0.000201694 | 6.681021494  |
| ILMN_1665775 | 0.152172029  | 6.339835111 | 3.71560422   | 0.000511253 | 0.020687748 | -0.37023796  |
| ILMN_2413899 | 0.151897125  | 6.613339801 | 4.608783474  | 2.82029E-05 | 0.003399736 | 2.339299082  |
| ILMN_1778087 | -0.151745302 | 12.66377147 | -4.56805032  | 3.23487E-05 | 0.003717517 | 2.210220487  |
| ILMN_1708672 | 0.151090049  | 9.817585384 | 3.752234828  | 0.000456345 | 0.019327963 | -0.264880414 |
| ILMN_1696713 | 0.150861164  | 7.818523367 | 5.154864322  | 4.33222E-06 | 0.001140133 | 4.107505891  |
| ILMN_1712305 | -0.150682223 | 9.841135588 | -3.330954656 | 0.001631439 | 0.040776416 | -1.440106937 |
| ILMN_1729225 | -0.150497387 | 6.254295319 | -4.302849011 | 7.81823E-05 | 0.006509608 | 1.381284225  |
| ILMN_2229379 | -0.150492034 | 6.133629685 | -3.401294511 | 0.001325717 | 0.03556843  | -1.249699635 |
| ILMN_3247848 | -0.150138198 | 6.894470153 | -4.595576993 | 2.94866E-05 | 0.003505451 | 2.297400988  |
| ILMN_1694840 | -0.150028314 | 7.088939309 | -3.656411111 | 0.000613616 | 0.022994577 | -0.539275488 |
| ILMN_3250268 | 0.149967121  | 7.791705366 | 4.080780897  | 0.000161186 | 0.010290814 | 0.704119589  |
| ILMN_1763907 | 0.149786741  | 10.09856606 | 5.881885369  | 3.32415E-07 | 0.000217901 | 6.540520595  |
| ILMN_1774685 | 0.149768742  | 6.321316435 | 4.344314134  | 6.81919E-05 | 0.006106451 | 1.509510537  |
| ILMN_1810942 | -0.149702983 | 6.842908302 | -3.492406357 | 0.001010006 | 0.030437914 | -0.999467488 |
| ILMN_1682165 | -0.149563248 | 9.812250366 | -4.017136362 | 0.000197761 | 0.012003526 | 0.513195915  |
| ILMN_1805828 | 0.148962681  | 8.975598563 | 4.704548716  | 2.03978E-05 | 0.00284711  | 2.644465216  |
| ILMN_2217809 | 0.147680466  | 9.865297437 | 3.739592192  | 0.000474623 | 0.019688161 | -0.301307477 |
| ILMN_1760620 | 0.147481626  | 7.638821681 | 5.459608585  | 1.48857E-06 | 0.000610953 | 5.1189126    |
| ILMN_2380588 | 0.147387481  | 8.905956084 | 5.521962125  | 1.19443E-06 | 0.000512766 | 5.327534192  |
| ILMN_1668629 | -0.147154939 | 9.240650478 | -3.584475911 | 0.000764559 | 0.02576088  | -0.742628014 |
| ILMN_1809866 | 0.14687859   | 8.35465094  | 4.989749339  | 7.68063E-06 | 0.00153062  | 3.566153912  |
| ILMN_1664369 | 0.146223738  | 6.806387544 | 5.002120449  | 7.35931E-06 | 0.001514546 | 3.606531683  |
| ILMN_1800412 | -0.145983881 | 7.865449707 | -7.84264695  | 2.88908E-10 | 2.4901E-06  | 13.22438735  |
| ILMN_1682738 | -0.145622455 | 8.942543553 | -4.35279491  | 6.63075E-05 | 0.00598434  | 1.535802108  |
| ILMN_1669479 | 0.145338647  | 7.352697752 | 3.886306668  | 0.000299811 | 0.015384685 | 0.125467185  |
| ILMN_1759419 | 0.14526734   | 8.841508239 | 6.045601742  | 1.85086E-07 | 0.000141801 | 7.096199979  |
| ILMN_1794914 | -0.145136958 | 7.94905921  | -4.301905309 | 7.84255E-05 | 0.006509608 | 1.378372198  |
| ILMN_1711314 | 0.145106064  | 9.227915869 | 4.43504036   | 5.04769E-05 | 0.004896446 | 1.791902728  |

|              |              |             |              |             |             |              |
|--------------|--------------|-------------|--------------|-------------|-------------|--------------|
| ILMN_1726839 | 0.144182595  | 10.39428272 | 4.063220354  | 0.000170565 | 0.010750255 | 0.651294455  |
| ILMN_1725193 | -0.143995836 | 10.16470107 | -6.361666166 | 5.94903E-08 | 6.21511E-05 | 8.173573313  |
| ILMN_1782403 | 0.14390058   | 7.305880123 | 4.576613226  | 3.14305E-05 | 0.003670097 | 2.237318585  |
| ILMN_1685722 | -0.143783374 | 11.69207743 | -5.023255569 | 6.84072E-06 | 0.001482674 | 3.675584849  |
| ILMN_1693630 | -0.143757426 | 6.773813424 | -3.635164416 | 0.000654939 | 0.023868572 | -0.599576963 |
| ILMN_1810392 | 0.143717491  | 7.699964909 | 4.916121205  | 9.89905E-06 | 0.001858065 | 3.326490455  |
| ILMN_1681249 | -0.14360394  | 8.864681078 | -5.669190274 | 7.08971E-07 | 0.000372997 | 5.82204226   |
| ILMN_1744211 | -0.143491817 | 6.010109406 | -3.922640544 | 0.000267251 | 0.01437401  | 0.232489902  |
| ILMN_1683127 | 0.143340695  | 9.525091049 | 3.33282504   | 0.001622508 | 0.040673606 | -1.435075885 |
| ILMN_1733519 | 0.143144613  | 7.128569209 | 5.319529648  | 2.43643E-06 | 0.000807676 | 4.652212275  |
| ILMN_1796417 | 0.143135703  | 8.30282101  | 4.688060649  | 2.15713E-05 | 0.00287032  | 2.591758846  |
| ILMN_1656482 | -0.142672658 | 8.367445998 | -4.647405892 | 2.47547E-05 | 0.003081022 | 2.462091812  |
| ILMN_1719938 | 0.142397173  | 6.741638783 | 4.097019176  | 0.000152959 | 0.009987528 | 0.753064934  |
| ILMN_2371055 | -0.142360181 | 10.52178493 | -4.913918351 | 9.97432E-06 | 0.001858065 | 3.319337564  |
| ILMN_2166524 | 0.142350673  | 7.416897998 | 4.842202109  | 1.27573E-05 | 0.002206412 | 3.087043526  |
| ILMN_1765109 | -0.142287738 | 8.299027525 | -3.850239636 | 0.000335898 | 0.016287503 | 0.019744024  |
| ILMN_2224657 | 0.141857498  | 6.722117736 | 3.499253293  | 0.000989429 | 0.030107298 | -0.980502767 |
| ILMN_2124352 | 0.141683905  | 10.239231   | 4.270791896  | 8.68692E-05 | 0.006982696 | 1.282522502  |
| ILMN_2287653 | -0.140669072 | 6.690451728 | -4.690413601 | 2.13999E-05 | 0.00287032  | 2.599276247  |
| ILMN_1784847 | 0.140526138  | 7.592238302 | 5.15827421   | 4.28107E-06 | 0.001135341 | 4.118738996  |
| ILMN_1773906 | -0.140375608 | 11.75632911 | -4.760215023 | 1.68801E-05 | 0.002505568 | 2.822901838  |
| ILMN_2203588 | -0.140272836 | 6.674290419 | -4.698249637 | 2.08386E-05 | 0.002858752 | 2.62432138   |
| ILMN_1651346 | -0.139968425 | 6.717753434 | -4.526180709 | 3.72303E-05 | 0.003986188 | 2.078006861  |
| ILMN_1678671 | -0.139868972 | 7.812515614 | -3.603262141 | 0.000722027 | 0.025017701 | -0.68974463  |
| ILMN_2134974 | 0.139836124  | 10.82826205 | 3.239887182  | 0.002127198 | 0.048535586 | -1.68290259  |
| ILMN_2348050 | 0.139666228  | 9.946905243 | 3.969140194  | 0.000230532 | 0.013127837 | 0.370199071  |
| ILMN_2062701 | -0.139215712 | 7.849424132 | -3.539385865 | 0.000876631 | 0.027932299 | -0.868901913 |
| ILMN_1775522 | -0.138880116 | 9.771732377 | -5.249581104 | 3.11282E-06 | 0.000933198 | 4.420277207  |
| ILMN_3306482 | 0.138854965  | 10.27698718 | 3.644425863  | 0.000636608 | 0.023549047 | -0.573315977 |
| ILMN_3233229 | -0.138791968 | 7.717481802 | -4.754656389 | 1.72027E-05 | 0.002529095 | 2.805050219  |
| ILMN_1803194 | 0.138673993  | 8.461655941 | 5.353379316  | 2.16348E-06 | 0.000768949 | 4.764725301  |
| ILMN_1779677 | -0.138671702 | 7.56289937  | -3.440629931 | 0.00117935  | 0.03321835  | -1.142157945 |
| ILMN_2404063 | -0.138518499 | 9.331986562 | -6.683808647 | 1.86398E-08 | 3.38223E-05 | 9.275154541  |
| ILMN_1732967 | -0.13842616  | 8.497603366 | -5.035315602 | 6.56111E-06 | 0.001468809 | 3.71502721   |
| ILMN_1770206 | 0.138378143  | 9.242453848 | 6.593716941  | 2.5792E-08  | 4.23431E-05 | 8.966905328  |
| ILMN_1731349 | -0.138277816 | 6.896796949 | -3.364114179 | 0.001479808 | 0.038388161 | -1.350652164 |
| ILMN_2414533 | -0.138187778 | 7.051802978 | -5.199745711 | 3.70479E-06 | 0.001030052 | 4.255520742  |
| ILMN_1719344 | -0.138021685 | 8.761622237 | -4.332063248 | 7.10064E-05 | 0.006248444 | 1.471570285  |
| ILMN_2409220 | 0.137835765  | 9.171432101 | 3.376778425  | 0.001425506 | 0.03743013  | -1.316342808 |
| ILMN_2297626 | 0.137795828  | 7.303478771 | 3.2946442    | 0.001814327 | 0.043772377 | -1.537425071 |
| ILMN_1803018 | -0.137765616 | 8.220185437 | -4.377544234 | 6.10938E-05 | 0.00564684  | 1.612654173  |
| ILMN_1744835 | 0.137732232  | 11.05111462 | 4.597183659  | 2.93275E-05 | 0.003498592 | 2.302495741  |
| ILMN_2103397 | -0.137635955 | 6.499243191 | -5.00803853  | 7.21032E-06 | 0.001514546 | 3.625858424  |
| ILMN_1723971 | 0.137598534  | 8.30686531  | 3.794033904  | 0.000400609 | 0.01801027  | -0.14397009  |
| ILMN_2079285 | -0.137553426 | 9.107559641 | -3.570242018 | 0.000798368 | 0.02631408  | -0.782590146 |
| ILMN_3237385 | -0.137317691 | 8.080546148 | -5.104814744 | 5.15596E-06 | 0.001243056 | 3.942869619  |
| ILMN_1730824 | 0.137295269  | 7.513409392 | 4.136143547  | 0.000134774 | 0.009128652 | 0.871374536  |
| ILMN_1742577 | 0.137250494  | 10.20435451 | 4.865067923  | 1.17959E-05 | 0.002118109 | 3.160984704  |
| ILMN_2334760 | -0.137084795 | 6.781816131 | -3.496135651 | 0.000998749 | 0.030259518 | -0.989140785 |
| ILMN_1711005 | 0.136865906  | 7.497245812 | 3.885578433  | 0.000300501 | 0.015384685 | 0.123327421  |
| ILMN_1797236 | -0.136772365 | 6.569355035 | -3.821004784 | 0.000368186 | 0.0171535   | -0.065570266 |
| ILMN_1667319 | -0.136599128 | 6.22959011  | -4.537408151 | 3.58548E-05 | 0.003911806 | 2.113413204  |
| ILMN_1903914 | 0.136454991  | 7.610041268 | 3.330797365  | 0.001632192 | 0.040776416 | -1.440529948 |
| ILMN_2074044 | 0.136380516  | 7.061313224 | 4.131126604  | 0.000136983 | 0.009223903 | 0.85617378   |

|              |              |             |              |             |             |              |
|--------------|--------------|-------------|--------------|-------------|-------------|--------------|
| ILMN_1739805 | -0.136336689 | 8.701650521 | -4.807548135 | 1.43628E-05 | 0.002349659 | 2.975207704  |
| ILMN_1796013 | 0.135658981  | 7.230506607 | 5.029746634  | 6.6888E-06  | 0.001468809 | 3.696810342  |
| ILMN_1716869 | -0.135482093 | 6.670322582 | -4.560758567 | 3.31513E-05 | 0.003769727 | 2.187160644  |
| ILMN_1770641 | -0.135281249 | 6.005745844 | -4.934166822 | 9.30309E-06 | 0.001781851 | 3.385125245  |
| ILMN_3246206 | 0.13510085   | 7.060913533 | 3.334751648  | 0.001613357 | 0.040600074 | -1.429891753 |
| ILMN_2082324 | 0.135069489  | 7.349484567 | 6.780015062  | 1.31761E-08 | 2.84323E-05 | 9.604367932  |
| ILMN_2045994 | -0.134645968 | 8.174051829 | -5.28472887  | 2.75251E-06 | 0.000847283 | 4.536722534  |
| ILMN_1766658 | 0.134501684  | 8.098890705 | 4.480061918  | 4.34418E-05 | 0.004445842 | 1.932937237  |
| ILMN_2225718 | 0.134490032  | 7.499276731 | 3.923444925  | 0.00026657  | 0.01437401  | 0.23486504   |
| ILMN_2061565 | -0.134398759 | 8.345870025 | -4.452979364 | 4.75497E-05 | 0.004751659 | 1.848028311  |
| ILMN_2140700 | -0.134239212 | 6.757812663 | -5.322579708 | 2.4105E-06  | 0.000807064 | 4.662343199  |
| ILMN_1726104 | 0.134232299  | 8.323975493 | 4.414013642  | 5.41323E-05 | 0.005169713 | 1.726236489  |
| ILMN_1718972 | 0.134151401  | 8.220587667 | 4.912736061  | 1.0015E-05  | 0.001858065 | 3.315498974  |
| ILMN_1698189 | 0.134120129  | 8.283863773 | 5.123158075  | 4.83753E-06 | 0.001192391 | 4.003156513  |
| ILMN_2344850 | -0.133863845 | 10.71218979 | -6.343874506 | 6.34229E-08 | 6.34968E-05 | 8.112807788  |
| ILMN_1660341 | -0.133861417 | 8.027968608 | -4.689995466 | 2.14303E-05 | 0.00287032  | 2.597940255  |
| ILMN_1666376 | -0.133446973 | 7.528632543 | -6.24549166  | 9.03388E-08 | 8.19611E-05 | 7.777009607  |
| ILMN_1795336 | 0.133249892  | 5.682204554 | 3.744820931  | 0.00046698  | 0.019597123 | -0.286250138 |
| ILMN_1724493 | 0.132792171  | 8.164774122 | 3.661775981  | 0.000603583 | 0.022767109 | -0.524017755 |
| ILMN_2135984 | 0.132714325  | 6.588567296 | 3.86503149   | 0.000320618 | 0.015996571 | 0.063040856  |
| ILMN_1666599 | 0.132236703  | 7.265357528 | 4.581722066  | 3.08948E-05 | 0.003622886 | 2.253495347  |
| ILMN_1832208 | 0.132046084  | 9.540906978 | 4.738400622  | 1.81813E-05 | 0.002633698 | 2.75288707   |
| ILMN_1806809 | -0.132009218 | 6.996510918 | -5.149083599 | 4.42029E-06 | 0.00114582  | 4.088467328  |
| ILMN_3274596 | -0.131988436 | 10.58902558 | -4.51368444  | 3.88219E-05 | 0.004079352 | 2.038640221  |
| ILMN_2326509 | 0.131875834  | 8.811934897 | 4.058724461  | 0.00017305  | 0.010808082 | 0.637787827  |
| ILMN_1671791 | 0.131707646  | 7.46911622  | 3.95720059   | 0.000239465 | 0.013337338 | 0.334761178  |
| ILMN_1712400 | 0.131686898  | 8.876374823 | 3.973425412  | 0.000227404 | 0.01305066  | 0.382931149  |
| ILMN_1655876 | -0.131192124 | 7.946875505 | -3.879162623 | 0.000306648 | 0.015569955 | 0.104484945  |
| ILMN_1773567 | -0.131106867 | 11.08087231 | -3.300752785 | 0.001782258 | 0.043301717 | -1.521100023 |
| ILMN_3263702 | 0.131029339  | 6.359063635 | 4.364794148  | 6.37278E-05 | 0.005842125 | 1.573039062  |
| ILMN_1709483 | 0.130637789  | 7.580602966 | 5.078288626  | 5.6533E-06  | 0.001334954 | 3.855799638  |
| ILMN_1669323 | 0.130573864  | 7.255135811 | 3.906709518  | 0.000281084 | 0.014794866 | 0.18550117   |
| ILMN_1788166 | 0.130487452  | 8.67503595  | 4.409127715  | 5.5018E-05  | 0.005225347 | 1.710996463  |
| ILMN_1797332 | 0.130392724  | 8.237209661 | 3.75292074   | 0.000455373 | 0.019310517 | -0.262902184 |
| ILMN_2414399 | 0.130313078  | 7.245649804 | 5.019535229  | 6.92932E-06 | 0.001482674 | 3.66342324   |
| ILMN_1745034 | 0.130044991  | 8.710431443 | 4.412001127  | 5.44954E-05 | 0.005190014 | 1.719958259  |
| ILMN_1655557 | -0.129260021 | 8.609699708 | -3.711134996 | 0.000518371 | 0.020853402 | -0.383053414 |
| ILMN_1669831 | 0.129227966  | 7.643488292 | 6.779613252  | 1.31952E-08 | 2.84323E-05 | 9.602992966  |
| ILMN_1678678 | -0.128890436 | 8.497363089 | -3.321194383 | 0.001678804 | 0.041479641 | -1.46633193  |
| ILMN_1759023 | -0.128823437 | 6.831852282 | -3.739248696 | 0.000475129 | 0.019688161 | -0.302296248 |
| ILMN_2285375 | 0.128498482  | 8.553090667 | 3.588040675  | 0.000756308 | 0.025663857 | -0.732605426 |
| ILMN_2151056 | -0.128474727 | 7.826808254 | -4.754034688 | 1.72392E-05 | 0.002529095 | 2.803054078  |
| ILMN_2148150 | 0.12804483   | 6.811128089 | 3.578094744  | 0.000779543 | 0.025916599 | -0.760554739 |
| ILMN_1665372 | -0.127976771 | 6.998520963 | -4.19294782  | 0.000112055 | 0.007948977 | 1.044086908  |
| ILMN_1748476 | 0.127973869  | 10.84240498 | 5.149220128  | 4.41819E-06 | 0.00114582  | 4.088916909  |
| ILMN_1657697 | -0.12791406  | 9.85875281  | -4.834977222 | 1.30768E-05 | 0.002206412 | 3.063704763  |
| ILMN_1717674 | -0.127613098 | 9.362654833 | -3.968068231 | 0.00023132  | 0.013138388 | 0.36701518   |
| ILMN_1796589 | 0.127567824  | 9.182447848 | 4.265462566  | 8.84016E-05 | 0.007038648 | 1.266135738  |
| ILMN_1735052 | -0.127511934 | 8.102006174 | -3.661395562 | 0.000604289 | 0.022768834 | -0.525100084 |
| ILMN_1667893 | -0.12724145  | 8.518278757 | -3.321693723 | 0.001676349 | 0.041479641 | -1.464991416 |
| ILMN_2398107 | 0.126452904  | 7.265734244 | 5.561625004  | 1.0381E-06  | 0.000470915 | 5.460497944  |
| ILMN_1777564 | 0.126416461  | 10.34517603 | 4.686447172  | 2.16896E-05 | 0.00287032  | 2.586604779  |
| ILMN_1670353 | 0.126202046  | 9.008402824 | 3.895257577  | 0.000291451 | 0.015162742 | 0.151784555  |
| ILMN_1799128 | 0.126115937  | 9.232999206 | 5.018451454  | 6.95534E-06 | 0.001482674 | 3.659880949  |



|              |              |             |              |             |             |              |
|--------------|--------------|-------------|--------------|-------------|-------------|--------------|
| ILMN_1758915 | 0.126029809  | 8.708471252 | 4.80157781   | 1.46587E-05 | 0.002349659 | 2.955967933  |
| ILMN_1713764 | -0.125727973 | 6.910494514 | -4.313105262 | 7.55861E-05 | 0.006438484 | 1.412950516  |
| ILMN_2305112 | 0.125701018  | 6.280870741 | 6.979481827  | 6.41845E-09 | 1.81181E-05 | 10.28676377  |
| ILMN_1815723 | 0.125541374  | 8.405450161 | 4.804234253  | 1.45263E-05 | 0.002349659 | 2.964527482  |
| ILMN_1704793 | -0.12527972  | 8.555960612 | -4.29389654  | 8.05193E-05 | 0.00664111  | 1.353670504  |
| ILMN_1703324 | 0.125235208  | 7.840373041 | 3.850881741  | 0.00033522  | 0.016287503 | 0.021621695  |
| ILMN_2085525 | 0.125177817  | 7.593519229 | 4.701681307  | 2.05973E-05 | 0.002851861 | 2.635294307  |
| ILMN_1776337 | 0.125156293  | 8.17941259  | 3.534364951  | 0.00089004  | 0.028141074 | -0.8829051   |
| ILMN_1811472 | 0.124958552  | 8.848214771 | 3.522106286  | 0.000923606 | 0.028842595 | -0.917045062 |
| ILMN_1700507 | -0.124920839 | 9.003335212 | -3.227332625 | 0.00220579  | 0.049866774 | -1.716037293 |
| ILMN_1789510 | 0.124792528  | 9.487128892 | 3.317420975  | 0.001697463 | 0.041801229 | -1.476457813 |
| ILMN_1669981 | -0.124360908 | 6.921258888 | -4.791456723 | 1.51742E-05 | 0.002377933 | 2.923370904  |
| ILMN_1725366 | 0.12429741   | 6.5204632   | 3.678449817  | 0.000573397 | 0.022062985 | -0.476516991 |
| ILMN_1801939 | 0.123929796  | 9.923410899 | 3.578857424  | 0.000777737 | 0.025881529 | -0.758413101 |
| ILMN_3300198 | -0.123622977 | 7.088250882 | -3.591602155 | 0.00074815  | 0.025572898 | -0.722586329 |
| ILMN_1698209 | 0.12351993   | 8.592883328 | 4.820631604  | 1.37346E-05 | 0.002287507 | 3.017398721  |
| ILMN_1659888 | 0.123509478  | 10.85665344 | 3.615336731  | 0.000695896 | 0.024558061 | -0.655670781 |
| ILMN_1808777 | -0.123417893 | 8.520059408 | -3.873139511 | 0.000312529 | 0.015706645 | 0.086810562  |
| ILMN_1759595 | -0.123113566 | 7.28027052  | -8.158142375 | 9.38903E-11 | 1.07899E-06 | 14.28666816  |
| ILMN_1897310 | -0.122985531 | 8.603913822 | -5.064035827 | 5.93976E-06 | 0.001383643 | 3.809070619  |
| ILMN_2246510 | -0.122975266 | 7.998612814 | -3.63245248  | 0.000660401 | 0.023919797 | -0.60725952  |
| ILMN_2408645 | 0.122937063  | 8.748485732 | 5.837429442  | 3.89566E-07 | 0.000244194 | 6.389998245  |
| ILMN_1810228 | 0.122751038  | 8.282954419 | 4.765739032  | 1.65653E-05 | 0.002483069 | 2.840649544  |
| ILMN_2377185 | -0.122673652 | 8.479247604 | -3.4874295   | 0.001025218 | 0.030580526 | -1.013238569 |
| ILMN_1709085 | 0.122619109  | 6.344561293 | 4.248313781  | 9.35132E-05 | 0.007224229 | 1.213468482  |
| ILMN_1791002 | 0.122602198  | 7.7818959   | 3.424376856  | 0.00123786  | 0.034129975 | -1.186684466 |
| ILMN_3245983 | -0.12257454  | 7.95500833  | -3.331418938 | 0.001629218 | 0.040776416 | -1.438858255 |
| ILMN_1748438 | 0.122512976  | 10.48075732 | 4.60551449   | 2.85155E-05 | 0.003425437 | 2.328923817  |
| ILMN_2411139 | 0.122288548  | 6.792350952 | 4.10476712   | 0.000149179 | 0.009825188 | 0.776451629  |
| ILMN_1787815 | 0.122247788  | 7.582959281 | 3.751743689  | 0.000457043 | 0.019333742 | -0.266296782 |
| ILMN_2324056 | 0.122214788  | 9.370994725 | 3.715225012  | 0.000511853 | 0.020687757 | -0.371325666 |
| ILMN_1651347 | -0.122189357 | 9.178162101 | -5.401891838 | 1.82422E-06 | 0.00070665  | 4.92627448   |
| ILMN_2143795 | 0.12217211   | 10.18028915 | 3.955018571  | 0.000241134 | 0.01339979  | 0.328290575  |
| ILMN_1759252 | -0.121980201 | 10.14330626 | -4.910903246 | 1.00783E-05 | 0.001858065 | 3.309548893  |
| ILMN_1768662 | 0.121939828  | 7.89357845  | 4.270013961  | 8.70913E-05 | 0.006982696 | 1.280129918  |
| ILMN_1672022 | -0.121822376 | 6.385237268 | -3.410086869 | 0.001291575 | 0.035144692 | -1.225727023 |
| ILMN_3240370 | 0.121802105  | 7.789923862 | 3.650199462  | 0.000625431 | 0.023310659 | -0.556925692 |
| ILMN_2111187 | 0.121652782  | 8.370280836 | 3.875261395  | 0.000310445 | 0.01567043  | 0.09303544   |
| ILMN_1794132 | 0.121519239  | 11.12478003 | 3.962678826  | 0.000235326 | 0.01326011  | 0.351014409  |
| ILMN_1710752 | 0.121472439  | 8.511522427 | 4.511957613  | 3.90471E-05 | 0.004079352 | 2.033203661  |
| ILMN_1712803 | 0.121449897  | 9.548288256 | 5.181402868  | 3.94957E-06 | 0.00107217  | 4.194985244  |
| ILMN_2090782 | 0.121388893  | 8.613407829 | 3.337135894  | 0.0016021   | 0.040464478 | -1.423473615 |
| ILMN_2195821 | -0.121306263 | 7.004528065 | -3.479098304 | 0.001051173 | 0.031056754 | -1.036264968 |
| ILMN_3251737 | -0.121253818 | 8.954101382 | -3.488912726 | 0.001020662 | 0.030580526 | -1.00913567  |
| ILMN_1798288 | -0.12076731  | 7.041443625 | -5.042707507 | 6.39532E-06 | 0.001468809 | 3.739216503  |
| ILMN_1801934 | -0.120607179 | 7.979873922 | -3.25540782  | 0.002033691 | 0.04726824  | -1.64182559  |
| ILMN_1689059 | -0.120469941 | 7.465566472 | -3.779196159 | 0.0004196   | 0.018404739 | -0.186973589 |
| ILMN_1770665 | -0.120337567 | 6.553792707 | -5.040025816 | 6.45499E-06 | 0.001468809 | 3.730439697  |
| ILMN_2080611 | 0.120276339  | 8.138754828 | 3.803647067  | 0.00038875  | 0.017715823 | -0.116060355 |
| ILMN_1764729 | -0.120270755 | 8.524975381 | -4.24911469  | 9.32682E-05 | 0.007224229 | 1.215926104  |
| ILMN_1740185 | -0.120245918 | 8.25080104  | -3.508102417 | 0.000963427 | 0.029550814 | -0.955959714 |
| ILMN_1770692 | 0.120115128  | 9.212045189 | 4.262789356  | 8.91802E-05 | 0.007073475 | 1.25791953   |
| ILMN_1791568 | 0.119972104  | 7.620487626 | 4.241563774  | 9.5603E-05  | 0.007251799 | 1.192764099  |
| ILMN_2243308 | -0.119920158 | 8.155540478 | -4.769386942 | 1.63606E-05 | 0.0024739   | 2.852373625  |

|              |              |             |              |             |             |              |
|--------------|--------------|-------------|--------------|-------------|-------------|--------------|
| ILMN_1779353 | 0.119768202  | 8.683326861 | 3.434112218  | 0.00120249  | 0.033496112 | -1.160029059 |
| ILMN_1717809 | -0.119720567 | 6.697764307 | -4.339780157 | 6.92206E-05 | 0.006166537 | 1.495463675  |
| ILMN_1684108 | -0.119694623 | 9.051949167 | -3.249860441 | 0.002066657 | 0.047754736 | -1.65652175  |
| ILMN_2235137 | 0.119675823  | 8.759065116 | 3.483267799  | 0.001038106 | 0.030826657 | -1.024745106 |
| ILMN_1790577 | 0.119656662  | 8.636032548 | 3.252130776  | 0.002053105 | 0.047505258 | -1.650509097 |
| ILMN_1805271 | -0.119647686 | 8.035720829 | -4.867950651 | 1.16799E-05 | 0.002108254 | 3.170314829  |
| ILMN_1677098 | -0.119383546 | 6.765280901 | -4.268753833 | 8.74522E-05 | 0.006995362 | 1.276254733  |
| ILMN_1838313 | 0.119201553  | 7.675533308 | 3.631865521  | 0.000661589 | 0.023919797 | -0.608921868 |
| ILMN_1696601 | 0.119145331  | 8.966240656 | 5.306680515  | 2.54872E-06 | 0.000820235 | 4.609549082  |
| ILMN_1732772 | 0.119079508  | 8.22064226  | 4.999578192  | 7.42424E-06 | 0.001514546 | 3.598231559  |
| ILMN_1682197 | 0.118914937  | 7.729660919 | 4.837026921  | 1.29854E-05 | 0.002206412 | 3.070324769  |
| ILMN_1654385 | 0.118742083  | 6.037031665 | 4.482788948  | 4.30479E-05 | 0.004430207 | 1.941498615  |
| ILMN_1665526 | -0.118404939 | 6.424291649 | -3.645184646 | 0.000635129 | 0.023519542 | -0.571162757 |
| ILMN_1754149 | -0.11831732  | 8.468934902 | -3.814940332 | 0.000375249 | 0.017295556 | -0.083224489 |
| ILMN_1673721 | 0.118145598  | 7.484523037 | 3.885195769  | 0.000300864 | 0.015384685 | 0.122203126  |
| ILMN_2077094 | 0.118050009  | 8.705852975 | 3.461758634  | 0.001107214 | 0.031916643 | -1.084083959 |
| ILMN_1768004 | -0.118013334 | 8.51597427  | -5.792003072 | 4.58046E-07 | 0.000281993 | 6.236372127  |
| ILMN_2285996 | 0.117684779  | 10.7801623  | 4.492809771  | 4.16302E-05 | 0.004323582 | 1.972976618  |
| ILMN_1712413 | 0.117647405  | 8.579679455 | 3.974108613  | 0.00022691  | 0.01305066  | 0.38496169   |
| ILMN_1667361 | -0.117585881 | 6.543923284 | -5.255590517 | 3.04808E-06 | 0.000921803 | 4.440172312  |
| ILMN_1695271 | 0.1173988    | 8.107912829 | 4.966350125  | 8.32657E-06 | 0.001621847 | 3.489866581  |
| ILMN_1656463 | 0.117398385  | 8.129104427 | 4.800408241  | 1.47174E-05 | 0.002349659 | 2.952199882  |
| ILMN_2112460 | 0.11738372   | 7.469196009 | 5.680738992  | 6.80481E-07 | 0.000372997 | 5.860937182  |
| ILMN_1805737 | 0.117376259  | 9.318393293 | 3.234462554  | 0.002160826 | 0.049075527 | -1.69722973  |
| ILMN_2351638 | -0.117120259 | 6.26908067  | -3.620424172 | 0.000685159 | 0.024488264 | -0.641294768 |
| ILMN_1714352 | -0.117020964 | 7.136768015 | -3.479156096 | 0.001050991 | 0.031056754 | -1.03610535  |
| ILMN_1733094 | 0.116959599  | 7.830280234 | 3.425212742  | 0.001234785 | 0.034083618 | -1.184397613 |
| ILMN_2317730 | -0.116899678 | 7.618262486 | -6.4321735   | 4.61562E-08 | 5.48717E-05 | 8.414483744  |
| ILMN_2061732 | 0.116856246  | 9.634741661 | 3.443856162  | 0.001168053 | 0.033143858 | -1.133304262 |
| ILMN_1773369 | 0.116850026  | 8.324905122 | 4.153616215  | 0.000127348 | 0.008816158 | 0.924382533  |
| ILMN_3239771 | 0.116847509  | 9.107843621 | 3.573816949  | 0.000789744 | 0.026205225 | -0.77256207  |
| ILMN_1712985 | 0.116482184  | 8.01608163  | 5.525004814  | 1.18166E-06 | 0.000512766 | 5.337727331  |
| ILMN_2108357 | 0.116326695  | 9.510669231 | 3.710021855  | 0.000520159 | 0.020880692 | -0.386244004 |
| ILMN_1741133 | 0.116236495  | 12.20590476 | 3.393986887  | 0.001354746 | 0.036070429 | -1.269595242 |
| ILMN_1787879 | 0.116224441  | 8.903314854 | 4.144580202  | 0.000131138 | 0.00895267  | 0.89695625   |
| ILMN_1702322 | -0.116212027 | 6.437327887 | -3.404411975 | 0.001313515 | 0.035472325 | -1.241204112 |
| ILMN_1813775 | -0.116068779 | 8.530452061 | -4.763502801 | 1.6692E-05  | 0.002491232 | 2.833464038  |
| ILMN_1652008 | 0.115689282  | 7.747765968 | 5.65829535   | 7.36932E-07 | 0.000373624 | 5.785362596  |
| ILMN_1655126 | -0.115644397 | 7.973173718 | -3.700072849 | 0.000536401 | 0.021256287 | -0.414737224 |
| ILMN_1715616 | 0.115547604  | 9.021956762 | 5.026576292  | 6.76258E-06 | 0.001475612 | 3.686442429  |
| ILMN_1700515 | 0.115506883  | 7.735061101 | 4.270027969  | 8.70873E-05 | 0.006982696 | 1.280172998  |
| ILMN_1697317 | -0.11544122  | 5.879137264 | -3.570517083 | 0.000797701 | 0.02631408  | -0.781818765 |
| ILMN_2311537 | 0.115407475  | 11.27813446 | 3.584223883  | 0.000765145 | 0.02576088  | -0.743336393 |
| ILMN_1704702 | 0.11540649   | 7.341246033 | 3.706682727  | 0.000525557 | 0.020981412 | -0.395811752 |
| ILMN_1786379 | 0.115382687  | 6.061254446 | 3.973287373  | 0.000227505 | 0.01305066  | 0.382520906  |
| ILMN_2253648 | 0.11533359   | 7.430883504 | 4.145972957  | 0.000130546 | 0.008929994 | 0.901181738  |
| ILMN_1720819 | 0.115311169  | 10.45167592 | 4.688557094  | 2.1535E-05  | 0.00287032  | 2.593344812  |
| ILMN_1689774 | -0.114940158 | 9.864237144 | -3.991893862 | 0.00021439  | 0.012591653 | 0.437882855  |
| ILMN_1755862 | 0.114934672  | 8.186321901 | 3.947054532  | 0.000247319 | 0.01362074  | 0.304689233  |
| ILMN_1795704 | -0.114760925 | 6.093777319 | -5.166198862 | 4.16451E-06 | 0.00111299  | 4.144852925  |
| ILMN_1676846 | 0.114758878  | 9.847005999 | 4.556068868  | 3.36778E-05 | 0.003769727 | 2.172337285  |
| ILMN_2227968 | 0.114521511  | 7.650799301 | 5.05844093   | 6.05607E-06 | 0.00140127  | 3.790737853  |
| ILMN_2371053 | -0.114449769 | 7.798919946 | -4.323758695 | 7.29783E-05 | 0.006321605 | 1.445878068  |
| ILMN_1760802 | 0.114397377  | 6.722675556 | 4.302283958  | 7.83279E-05 | 0.006509608 | 1.379540579  |

|              |              |             |              |             |             |              |
|--------------|--------------|-------------|--------------|-------------|-------------|--------------|
| ILMN_2357781 | -0.114044211 | 6.984021562 | -3.754072299 | 0.000453746 | 0.019291319 | -0.259580541 |
| ILMN_1703041 | -0.114034624 | 5.961960475 | -4.559976452 | 3.32386E-05 | 0.003769727 | 2.184688093  |
| ILMN_1674421 | -0.113869894 | 8.956568774 | -4.767403545 | 1.64716E-05 | 0.002479805 | 2.84599876   |
| ILMN_1686906 | -0.113728603 | 6.619970145 | -3.376147355 | 0.001428167 | 0.037442953 | -1.318054355 |
| ILMN_1743763 | -0.11365086  | 8.513738595 | -3.884827437 | 0.000301214 | 0.015384685 | 0.121120996  |
| ILMN_1732750 | 0.113650115  | 7.464403489 | 4.282679178  | 8.35437E-05 | 0.006857741 | 1.31910668   |
| ILMN_1749829 | 0.113573624  | 9.291546732 | 3.474093622  | 0.001067064 | 0.031176358 | -1.050081466 |
| ILMN_1731070 | 0.113383872  | 8.203436146 | 4.091640639  | 0.000155638 | 0.010071639 | 0.736842614  |
| ILMN_3273047 | 0.113000352  | 6.289676893 | 3.73705839   | 0.00047837  | 0.019732794 | -0.308599989 |
| ILMN_2398926 | 0.112973331  | 8.502134182 | 5.133473613  | 4.66706E-06 | 0.001174463 | 4.037086398  |
| ILMN_3282768 | 0.112920632  | 8.488820036 | 3.229774988  | 0.002190289 | 0.049613941 | -1.709597755 |
| ILMN_1737728 | 0.112816606  | 8.578393675 | 3.641546968  | 0.000642253 | 0.023681622 | -0.581483191 |
| ILMN_1780382 | 0.112813887  | 9.142404109 | 4.439297021  | 4.97668E-05 | 0.004863867 | 1.805212027  |
| ILMN_1683598 | 0.112782877  | 8.471195899 | 3.479070768  | 0.00105126  | 0.031056754 | -1.036341019 |
| ILMN_1722642 | -0.112751112 | 7.24796175  | -3.629907064 | 0.000665568 | 0.02400222  | -0.61446738  |
| ILMN_1676600 | -0.112530622 | 9.628447257 | -3.607723882 | 0.000712264 | 0.024854261 | -0.677161445 |
| ILMN_1663716 | -0.112470797 | 6.101306713 | -4.276218713 | 8.53354E-05 | 0.006955134 | 1.299218402  |
| ILMN_1662658 | 0.112443675  | 9.094334708 | 3.730064461  | 0.00048886  | 0.019992792 | -0.328715054 |
| ILMN_1684217 | 0.112442672  | 8.660205276 | 4.247815117  | 9.3666E-05  | 0.007224229 | 1.211938416  |
| ILMN_3246754 | 0.112062568  | 6.658273383 | 5.3282061    | 2.36338E-06 | 0.000807064 | 4.681035293  |
| ILMN_1730291 | -0.111754638 | 8.709407451 | -3.326360568 | 0.001653573 | 0.04119118  | -1.452456848 |
| ILMN_1796180 | -0.111733681 | 7.129997011 | -5.522943343 | 1.1903E-06  | 0.000512766 | 5.330821186  |
| ILMN_2338963 | 0.111665615  | 7.851580883 | 3.340519274  | 0.001586254 | 0.04021154  | -1.414361003 |
| ILMN_1781039 | -0.111528208 | 8.572213576 | -4.781862454 | 1.56792E-05 | 0.002407453 | 2.892492627  |
| ILMN_2382505 | -0.111513532 | 6.686503073 | -4.015616286 | 0.000198726 | 0.012019778 | 0.508653974  |
| ILMN_1810069 | 0.11150471   | 7.707761534 | 4.251394147  | 9.25743E-05 | 0.007220796 | 1.22292186   |
| ILMN_1795839 | -0.111435682 | 7.585746898 | -3.883718248 | 0.000302271 | 0.015415813 | 0.117862608  |
| ILMN_1725791 | 0.111392868  | 7.771938699 | 3.873376895  | 0.000312295 | 0.015706645 | 0.087506876  |
| ILMN_1794740 | -0.111314023 | 8.18694178  | -3.659012455 | 0.000608731 | 0.022886172 | -0.531878819 |
| ILMN_1719870 | 0.111309716  | 8.180480194 | 3.894628924  | 0.000292031 | 0.015162742 | 0.149935171  |
| ILMN_2070349 | 0.111135329  | 6.622780832 | 3.935294789  | 0.000256734 | 0.013982871 | 0.269883651  |
| ILMN_1689800 | 0.111079357  | 8.066725921 | 4.447193756  | 4.84752E-05 | 0.004788625 | 1.829916719  |
| ILMN_1757230 | -0.111063295 | 6.625258517 | -5.416554877 | 1.73245E-06 | 0.000686528 | 4.975170272  |
| ILMN_2316540 | 0.111024394  | 10.15592311 | 3.827471962  | 0.000360796 | 0.016988542 | -0.046727219 |
| ILMN_1709484 | 0.110995857  | 6.939208813 | 4.713942254  | 1.97575E-05 | 0.002791642 | 2.674523014  |
| ILMN_1727740 | 0.110981004  | 9.924555301 | 3.839066457  | 0.000347902 | 0.016592727 | -0.012902645 |
| ILMN_1671933 | 0.110868409  | 10.03989744 | 3.555969899  | 0.0008337   | 0.027039163 | -0.822566863 |
| ILMN_1721868 | 0.110856354  | 9.594540838 | 3.492662579  | 0.001009229 | 0.030437914 | -0.998758199 |
| ILMN_1757697 | 0.110488038  | 7.179199199 | 4.037381014  | 0.000185333 | 0.011430293 | 0.573767223  |
| ILMN_1668996 | 0.110447744  | 10.9740981  | 4.356257228  | 6.55529E-05 | 0.005933454 | 1.546542117  |
| ILMN_1781198 | -0.110344572 | 7.040246259 | -4.661361281 | 2.36132E-05 | 0.003004023 | 2.506554882  |
| ILMN_1776788 | -0.110283692 | 6.904600806 | -3.700256847 | 0.000536096 | 0.021256287 | -0.414210651 |
| ILMN_3249406 | 0.110239838  | 7.633908106 | 4.439634523  | 4.97109E-05 | 0.004863867 | 1.80626752   |
| ILMN_1769839 | -0.11021839  | 5.604133267 | -3.819638523 | 0.000369766 | 0.017174075 | -0.069548892 |
| ILMN_1661589 | -0.110142689 | 9.039459339 | -3.562561506 | 0.0008172   | 0.026679717 | -0.804115112 |
| ILMN_1769091 | 0.110130474  | 10.25774921 | 3.891653206  | 0.00029479  | 0.015237156 | 0.14118324   |
| ILMN_1670931 | 0.109982408  | 8.344569045 | 4.645968795  | 2.48753E-05 | 0.003084892 | 2.457515921  |
| ILMN_1757415 | 0.109798743  | 7.754264264 | 4.346003319  | 6.78124E-05 | 0.006104183 | 1.514745478  |
| ILMN_2390609 | -0.1096809   | 7.612098975 | -3.723432303 | 0.000499011 | 0.020263719 | -0.347770486 |
| ILMN_1882000 | 0.109602426  | 7.486804543 | 4.826208903  | 1.34751E-05 | 0.002255179 | 3.035396058  |
| ILMN_1805481 | 0.109382783  | 8.210687973 | 3.24891342   | 0.002072335 | 0.047830793 | -1.659029    |
| ILMN_1799667 | 0.109126434  | 7.599247815 | 4.779955478  | 1.57815E-05 | 0.002407453 | 2.886357763  |
| ILMN_1668498 | 0.109033111  | 8.076128406 | 4.450890769  | 4.78818E-05 | 0.004771017 | 1.841488936  |
| ILMN_1686097 | 0.108979349  | 10.63696681 | 3.782293407  | 0.000415566 | 0.018351643 | -0.1780045   |

|              |              |             |              |             |             |              |
|--------------|--------------|-------------|--------------|-------------|-------------|--------------|
| ILMN_1745813 | -0.108717332 | 9.21089245  | -3.561996592 | 0.000818602 | 0.026700197 | -0.805697245 |
| ILMN_2409298 | 0.108432472  | 9.038152177 | 3.586093906  | 0.000760803 | 0.025703058 | -0.73807962  |
| ILMN_1789123 | 0.108426667  | 9.000204231 | 4.189342607  | 0.000113379 | 0.008026385 | 1.033092785  |
| ILMN_1798690 | -0.108315309 | 6.199460696 | -3.478075568 | 0.001054402 | 0.03106853  | -1.039089417 |
| ILMN_1739083 | -0.10824969  | 7.948387784 | -4.112318676 | 0.000145581 | 0.009652032 | 0.799265869  |
| ILMN_1788211 | -0.108230377 | 7.375675481 | -3.310614511 | 0.001731617 | 0.042400013 | -1.494704572 |
| ILMN_1798459 | 0.10804744   | 6.719282624 | 3.443015763  | 0.001170986 | 0.033168616 | -1.135611035 |
| ILMN_1656057 | -0.107983713 | 10.21880809 | -3.476355443 | 0.001059854 | 0.031123962 | -1.043838699 |
| ILMN_1753502 | -0.107965539 | 5.861392599 | -5.357683691 | 2.13101E-06 | 0.000765299 | 4.779045051  |
| ILMN_2263144 | 0.107941111  | 7.580538206 | 3.761821749  | 0.000442938 | 0.018993463 | -0.237213014 |
| ILMN_1743620 | 0.107590924  | 6.116471599 | 4.715564207  | 1.9649E-05  | 0.00278773  | 2.679715194  |
| ILMN_1809495 | 0.107530362  | 12.22347304 | 4.222304395  | 0.000101819 | 0.007390097 | 1.133771588  |
| ILMN_2072391 | 0.107484488  | 8.267507843 | 3.789414697  | 0.000406431 | 0.018103496 | -0.157367445 |
| ILMN_2326512 | 0.107427063  | 8.422317328 | 3.668960444  | 0.000590394 | 0.022452432 | -0.503565369 |
| ILMN_2048507 | 0.107324466  | 6.934676879 | 3.79189636   | 0.000403293 | 0.018033631 | -0.150170825 |
| ILMN_1734316 | 0.107294264  | 7.968123315 | 4.55674145   | 3.36018E-05 | 0.003769727 | 2.174462838  |
| ILMN_2219712 | 0.107291688  | 10.6231244  | 4.379146596  | 6.07704E-05 | 0.005632046 | 1.61763627   |
| ILMN_2155172 | 0.107286873  | 9.350677952 | 3.585604782  | 0.000761937 | 0.025703058 | -0.739454735 |
| ILMN_2214713 | 0.107107885  | 6.939689865 | 5.307673797  | 2.53986E-06 | 0.000820235 | 4.612846176  |
| ILMN_1683096 | 0.106992877  | 7.12992344  | 4.890468319  | 1.08113E-05 | 0.001982616 | 3.243257519  |
| ILMN_1729987 | -0.106984707 | 8.692391089 | -5.241739825 | 3.19936E-06 | 0.000934754 | 4.394326346  |
| ILMN_2401436 | 0.106948257  | 6.733041756 | 4.685923618  | 2.17282E-05 | 0.00287032  | 2.584932485  |
| ILMN_1714710 | -0.106891542 | 7.440476788 | -4.585994124 | 3.04537E-05 | 0.003595624 | 2.267027858  |
| ILMN_1672094 | -0.106794829 | 6.75480312  | -3.357602659 | 0.001508487 | 0.038902714 | -1.368261796 |
| ILMN_1792986 | 0.106733964  | 7.065097729 | 4.642650536  | 2.51559E-05 | 0.003108508 | 2.446952215  |
| ILMN_2405521 | 0.106707457  | 9.70985749  | 4.181024432  | 0.000116492 | 0.008229868 | 1.007743142  |
| ILMN_1761131 | 0.106697847  | 9.413357388 | 4.454721982  | 4.72743E-05 | 0.004737875 | 1.853485397  |
| ILMN_1728262 | 0.106644301  | 5.633907349 | 3.463121336  | 0.001102709 | 0.031813375 | -1.080331118 |
| ILMN_1786125 | 0.106629104  | 9.58544411  | 3.53261434   | 0.000894761 | 0.028223047 | -0.887784759 |
| ILMN_1664912 | -0.10659609  | 6.625301862 | -3.432352287 | 0.001208812 | 0.033515316 | -1.164851146 |
| ILMN_1751708 | -0.106485841 | 12.29033155 | -3.597291252 | 0.000735294 | 0.025248984 | -0.706569981 |
| ILMN_2048478 | -0.106445995 | 6.143759477 | -4.049927436 | 0.000178014 | 0.011038134 | 0.61138077   |
| ILMN_2344971 | 0.106370364  | 7.690905689 | 4.399733744  | 5.67608E-05 | 0.005346678 | 1.681715027  |
| ILMN_1705301 | 0.106352558  | 7.378086814 | 3.759484864  | 0.000446171 | 0.01908461  | -0.243960699 |
| ILMN_2347592 | 0.106340975  | 7.731767718 | 3.390091556  | 0.001370465 | 0.036422403 | -1.280189875 |
| ILMN_3244521 | -0.106218996 | 8.874954366 | -3.371319231 | 0.001448678 | 0.037865528 | -1.331142355 |
| ILMN_1719543 | -0.10618849  | 6.558594015 | -3.811150591 | 0.000379728 | 0.017435104 | -0.094249199 |
| ILMN_1823231 | -0.106154613 | 6.043474121 | -3.335647945 | 0.001609117 | 0.040600074 | -1.427479353 |
| ILMN_1775939 | 0.106129895  | 9.10934211  | 3.597827939  | 0.000734092 | 0.025232845 | -0.705058307 |
| ILMN_3243248 | 0.106090879  | 6.648626861 | 4.570820577  | 3.20488E-05 | 0.003707769 | 2.21898506   |
| ILMN_2077550 | 0.106059401  | 9.130640182 | 3.785144042  | 0.000411885 | 0.01828095  | -0.169746051 |
| ILMN_1670542 | 0.105890642  | 9.474264184 | 3.469227443  | 0.001082735 | 0.031474169 | -1.063504183 |
| ILMN_1773470 | -0.1058481   | 7.148702109 | -3.977934931 | 0.000224158 | 0.013032152 | 0.39633713   |
| ILMN_1705907 | 0.10582135   | 8.640686952 | 4.665054611  | 2.33199E-05 | 0.00298876  | 2.518330446  |
| ILMN_1701374 | 0.105685252  | 8.063288812 | 4.666492055  | 2.32067E-05 | 0.002985349 | 2.522914431  |
| ILMN_1700257 | 0.105617109  | 7.44588105  | 4.305882683  | 7.74055E-05 | 0.006493021 | 1.39064727   |
| ILMN_2048633 | 0.105414215  | 6.738295177 | 3.549354414  | 0.000850579 | 0.027457456 | -0.84106541  |
| ILMN_2063114 | 0.105409827  | 7.510759563 | 3.475327703  | 0.001063124 | 0.031166904 | -1.046675628 |
| ILMN_1716279 | 0.105328891  | 8.575243615 | 3.434628518  | 0.001200641 | 0.033496112 | -1.158614147 |
| ILMN_1787415 | -0.105314288 | 7.716048692 | -4.014179095 | 0.000199642 | 0.012032997 | 0.504360473  |
| ILMN_1814122 | 0.105295986  | 8.830414732 | 4.381441546  | 6.03101E-05 | 0.005614129 | 1.624773129  |
| ILMN_2404407 | -0.105147323 | 6.015306341 | -4.018407689 | 0.000196957 | 0.011975832 | 0.516995258  |
| ILMN_2202948 | 0.105045018  | 8.434508364 | 3.940033341  | 0.000252899 | 0.013839621 | 0.283902084  |
| ILMN_1799604 | 0.105020783  | 10.66304612 | 5.214172146  | 3.52285E-06 | 0.000995522 | 4.30317175   |

|              |              |             |              |             |             |              |
|--------------|--------------|-------------|--------------|-------------|-------------|--------------|
| ILMN_3256325 | -0.104841766 | 7.767774337 | -4.249892624 | 9.30308E-05 | 0.007224229 | 1.218313428  |
| ILMN_1809488 | 0.104793375  | 10.62056369 | 4.685902594  | 2.17297E-05 | 0.00287032  | 2.584865333  |
| ILMN_1700546 | 0.104695806  | 7.170142048 | 3.633674665  | 0.000657934 | 0.023919797 | -0.603797635 |
| ILMN_1698996 | 0.104681151  | 6.577959557 | 4.059203893  | 0.000172783 | 0.010808082 | 0.639227797  |
| ILMN_1716524 | -0.104623689 | 10.43269012 | -4.912416184 | 1.0026E-05  | 0.001858065 | 3.31446047   |
| ILMN_1765258 | -0.104618718 | 9.497473414 | -4.14715399  | 0.000130047 | 0.008929994 | 0.904765403  |
| ILMN_1653134 | -0.104513062 | 7.862712129 | -3.75557476  | 0.000451631 | 0.019270331 | -0.255245896 |
| ILMN_1761069 | 0.104377687  | 7.418121548 | 3.922833775  | 0.000267087 | 0.01437401  | 0.233060444  |
| ILMN_1706817 | -0.104207745 | 8.933567806 | -4.152966325 | 0.000127617 | 0.008817074 | 0.922409038  |
| ILMN_1714473 | -0.104006181 | 6.555985411 | -4.701906762 | 2.05816E-05 | 0.002851861 | 2.636015311  |
| ILMN_2249920 | -0.103982212 | 6.030495244 | -3.694156577 | 0.00054629  | 0.021487249 | -0.431660826 |
| ILMN_1671895 | -0.103872918 | 6.998514485 | -3.83393585  | 0.000353552 | 0.016789339 | -0.027876837 |
| ILMN_1728083 | -0.103775293 | 7.764652866 | -3.961572813 | 0.000236156 | 0.01326011  | 0.347732092  |
| ILMN_1703477 | -0.10356919  | 8.719924018 | -4.533611788 | 3.63143E-05 | 0.003924673 | 2.101437281  |
| ILMN_1773760 | 0.103461457  | 10.87738174 | 3.501903363  | 0.000981573 | 0.029894623 | -0.973156653 |
| ILMN_1704253 | -0.103438779 | 7.390643803 | -4.17739727  | 0.000117875 | 0.008293606 | 0.996696677  |
| ILMN_1690802 | 0.10328138   | 11.86293949 | 4.060457733  | 0.000172088 | 0.010801677 | 0.642994087  |
| ILMN_2306189 | -0.103225095 | 8.775216014 | -4.307953936 | 7.68794E-05 | 0.006480173 | 1.397041599  |
| ILMN_1803312 | 0.103150136  | 10.1723036  | 4.228339368  | 9.98298E-05 | 0.007338448 | 1.152243918  |
| ILMN_1744308 | 0.103131928  | 8.517396068 | 5.650338046  | 7.58042E-07 | 0.000378757 | 5.758581223  |
| ILMN_1777853 | -0.102989695 | 6.925166684 | -3.616424857 | 0.000693586 | 0.024558061 | -0.652596942 |
| ILMN_1679177 | 0.102748392  | 7.841529653 | 3.612938143  | 0.000701014 | 0.024636243 | -0.662444664 |
| ILMN_1815184 | 0.102649319  | 9.900279107 | 3.36961523   | 0.001455984 | 0.038027652 | -1.335758771 |
| ILMN_1750518 | 0.102645677  | 9.345884188 | 3.671996176  | 0.000584905 | 0.022356075 | -0.494916626 |
| ILMN_1654493 | 0.102595153  | 7.359277742 | 4.133931735  | 0.000135744 | 0.009176294 | 0.864671927  |
| ILMN_1655117 | 0.102468039  | 7.80741635  | 3.655304988  | 0.000615704 | 0.023047779 | -0.542419742 |
| ILMN_1671257 | 0.10242845   | 10.84110977 | 4.684228012  | 2.18534E-05 | 0.002875057 | 2.579516987  |
| ILMN_3245893 | 0.102396214  | 6.436412395 | 6.388559721  | 5.40026E-08 | 6.00579E-05 | 8.265445551  |
| ILMN_3251423 | 0.102381138  | 6.070936542 | 5.404967091  | 1.80458E-06 | 0.00070665  | 4.936526765  |
| ILMN_1802251 | -0.102365574 | 9.78416461  | -4.309521898 | 7.64835E-05 | 0.006462855 | 1.401883077  |
| ILMN_1785413 | 0.102281946  | 6.579484474 | 4.312501463  | 7.57366E-05 | 0.006438484 | 1.411085365  |
| ILMN_2350574 | -0.102227862 | 7.01952651  | -3.738533764 | 0.000476184 | 0.019708206 | -0.304354059 |
| ILMN_1678095 | 0.102179595  | 6.227519664 | 3.816296574  | 0.000373658 | 0.017268413 | -0.079277631 |
| ILMN_1798256 | 0.102102179  | 10.07763073 | 3.267272767  | 0.001964842 | 0.04627043  | -1.610339165 |
| ILMN_1815885 | -0.101989378 | 6.751585841 | -4.434541414 | 5.05608E-05 | 0.004896446 | 1.790343022  |
| ILMN_1744239 | 0.101799523  | 7.234171366 | 4.284780058  | 8.29689E-05 | 0.00682682  | 1.325577028  |
| ILMN_1682095 | -0.101710121 | 7.826886844 | -4.729445447 | 1.87436E-05 | 0.002692517 | 2.72417801   |
| ILMN_1688526 | 0.101658469  | 11.46092375 | 4.719370495  | 1.93965E-05 | 0.002763285 | 2.691902383  |
| ILMN_1788416 | 0.101648297  | 10.07321808 | 3.796696573  | 0.00039729  | 0.017952992 | -0.136243405 |
| ILMN_1734483 | -0.101560847 | 8.371627796 | -4.994295856 | 7.56097E-06 | 0.001524397 | 3.580989602  |
| ILMN_1690371 | 0.101476765  | 9.478240738 | 3.997696529  | 0.000210451 | 0.012381439 | 0.455174651  |
| ILMN_1748923 | 0.101455685  | 7.985495475 | 3.484667982  | 0.001033753 | 0.03075036  | -1.020874704 |
| ILMN_1801118 | 0.10129261   | 9.449758515 | 3.240503941  | 0.002123406 | 0.048513279 | -1.681272675 |
| ILMN_1804988 | -0.101266749 | 8.036671177 | -3.587061413 | 0.000758566 | 0.025703058 | -0.735359265 |
| ILMN_2198515 | -0.101190742 | 6.781700792 | -3.290032434 | 0.001838898 | 0.044148923 | -1.549737243 |
| ILMN_1682226 | -0.101024286 | 6.776447359 | -4.448001022 | 4.8345E-05  | 0.004788625 | 1.832443247  |
| ILMN_1691578 | 0.10098201   | 8.624275051 | 3.502073176  | 0.000981072 | 0.029894623 | -0.97268581  |
| ILMN_1661293 | -0.100978705 | 6.006452296 | -3.808336773 | 0.000383087 | 0.0175396   | -0.102431068 |
| ILMN_1777895 | -0.100955108 | 7.506302808 | -4.707928858 | 2.01651E-05 | 0.002834636 | 2.65527862   |
| ILMN_1798654 | 0.100850085  | 10.43061867 | 4.195554523  | 0.000111107 | 0.007897983 | 1.052038783  |
| ILMN_2205999 | 0.100567506  | 6.563454149 | 3.924201188  | 0.000265932 | 0.01437401  | 0.237098327  |
| ILMN_1797307 | 0.100500719  | 7.472940786 | 3.84880911   | 0.000337412 | 0.016315041 | 0.015561403  |
| ILMN_2278636 | -0.100496028 | 8.45339744  | -4.63963174  | 2.54138E-05 | 0.003118034 | 2.437344314  |
| ILMN_1723625 | 0.100413602  | 8.226136828 | 3.366764234  | 0.001468285 | 0.038239954 | -1.343479359 |

|              |              |             |              |             |             |              |
|--------------|--------------|-------------|--------------|-------------|-------------|--------------|
| ILMN_1752988 | -0.100389889 | 8.508428044 | -4.272111209 | 8.64939E-05 | 0.006982696 | 1.286580571  |
| ILMN_2051373 | 0.100313749  | 9.100051492 | 3.47603434   | 0.001060875 | 0.031127423 | -1.04472511  |
| ILMN_2312719 | 0.100211617  | 9.234985365 | 3.783764902  | 0.000413662 | 0.018307329 | -0.173741916 |
| ILMN_2124816 | -0.100202759 | 6.475060161 | -3.470442192 | 0.001078802 | 0.031439387 | -1.060154513 |
| ILMN_1798177 | -0.100198997 | 9.656603651 | -4.672406464 | 2.27465E-05 | 0.002948155 | 2.54178088   |
| ILMN_1743911 | 0.100016016  | 10.10491784 | 3.523956448  | 0.000918463 | 0.028760166 | -0.911896899 |
| ILMN_1712122 | 0.099963232  | 5.943253436 | 5.641958129  | 7.80922E-07 | 0.000384615 | 5.730385119  |
| ILMN_1754234 | 0.099931879  | 8.750926766 | 3.968837865  | 0.000230754 | 0.013127837 | 0.369301066  |
| ILMN_1721741 | -0.099880409 | 8.567651102 | -3.635809623 | 0.000653646 | 0.023868572 | -0.597748698 |
| ILMN_1758633 | -0.099746357 | 8.386412058 | -3.754032877 | 0.000453801 | 0.019291319 | -0.259694262 |
| ILMN_2364357 | 0.099685017  | 9.160358027 | 3.693607794  | 0.000547216 | 0.021487249 | -0.433229867 |
| ILMN_3241979 | 0.099636405  | 8.523769598 | 3.547640196  | 0.000855006 | 0.02749737  | -0.845855509 |
| ILMN_1730825 | 0.099587965  | 7.212852178 | 3.447848997  | 0.001154214 | 0.032859361 | -1.122339861 |
| ILMN_2226304 | -0.099562289 | 7.526338806 | -3.381135084 | 0.001407267 | 0.037092467 | -1.304521571 |
| ILMN_1656670 | 0.099523586  | 6.613323418 | 4.3259752    | 7.24468E-05 | 0.006307263 | 1.452733281  |
| ILMN_1659364 | 0.099514478  | 9.22749337  | 4.065615932  | 0.000169255 | 0.010687232 | 0.658494258  |
| ILMN_1676548 | 0.099426108  | 10.23763896 | 3.456282523  | 0.001125496 | 0.032201321 | -1.099156064 |
| ILMN_1665205 | -0.099313355 | 6.758934227 | -3.645793666 | 0.000633943 | 0.023517303 | -0.56943434  |
| ILMN_1797298 | -0.09923338  | 6.449558603 | -4.541266957 | 3.53936E-05 | 0.003886087 | 2.125590168  |
| ILMN_1737611 | -0.099132363 | 6.669950183 | -5.737284991 | 5.56564E-07 | 0.000325222 | 6.051582352  |
| ILMN_3196019 | 0.099108976  | 7.91190747  | 3.5235516    | 0.000919586 | 0.028769196 | -0.913023545 |
| ILMN_1674302 | 0.09899494   | 8.246590724 | 3.666251651  | 0.000595334 | 0.022553434 | -0.511279281 |
| ILMN_1672504 | -0.098872082 | 9.839357917 | -3.416724878 | 0.001266353 | 0.034677354 | -1.207603278 |
| ILMN_1765858 | 0.098839649  | 11.04109625 | 4.465214308  | 4.56489E-05 | 0.004628802 | 1.886361105  |
| ILMN_1705201 | -0.098808357 | 6.14596149  | -3.526426249 | 0.000911642 | 0.028624549 | -0.905022078 |
| ILMN_1805104 | -0.0986951   | 5.880777654 | -3.545012021 | 0.000861836 | 0.027588339 | -0.853196881 |
| ILMN_1733956 | 0.098658309  | 9.365748601 | 3.550935371  | 0.000846516 | 0.02737756  | -0.83664649  |
| ILMN_1741736 | 0.098593406  | 8.045154438 | 4.992302847  | 7.61319E-06 | 0.001526003 | 3.57448572   |
| ILMN_1780937 | 0.098485109  | 7.910152734 | 4.655286052  | 2.41037E-05 | 0.003034838 | 2.487192575  |
| ILMN_1753482 | 0.098298673  | 6.521849759 | 3.730084351  | 0.000488829 | 0.019992792 | -0.328657877 |
| ILMN_2376667 | -0.098296982 | 7.415980103 | -4.784301133 | 1.55493E-05 | 0.002403936 | 2.900339251  |
| ILMN_2041046 | 0.098246719  | 10.23293506 | 4.331497728  | 7.1139E-05  | 0.006248444 | 1.469820027  |
| ILMN_1712320 | -0.098245882 | 8.823535485 | -4.569535801 | 3.21876E-05 | 0.003711367 | 2.214920012  |
| ILMN_1657797 | 0.098199715  | 8.498497899 | 3.54963681   | 0.000849852 | 0.027457456 | -0.840276171 |
| ILMN_1655177 | -0.098178945 | 8.835962518 | -3.801257836 | 0.000391665 | 0.017767168 | -0.123000511 |
| ILMN_2320906 | 0.098165167  | 8.239527803 | 3.781758081  | 0.00041626  | 0.018351643 | -0.179554993 |
| ILMN_2336781 | 0.098162947  | 9.712383469 | 3.624481855  | 0.00067671  | 0.024327676 | -0.629820358 |
| ILMN_1778059 | 0.098097957  | 6.052982091 | 4.522755737  | 3.76601E-05 | 0.004007313 | 2.067212955  |
| ILMN_1685005 | -0.098089677 | 9.236945181 | -5.082754721 | 5.56638E-06 | 0.001323493 | 3.87045003   |
| ILMN_1721713 | 0.09806712   | 8.74185298  | 3.77137613   | 0.000429954 | 0.018728635 | -0.209601333 |
| ILMN_1792078 | -0.097898063 | 9.804828113 | -4.491198712 | 4.1855E-05  | 0.004333315 | 1.967913945  |
| ILMN_2371700 | 0.097897091  | 7.614581369 | 4.014896193  | 0.000199185 | 0.012026426 | 0.506502653  |
| ILMN_3306997 | 0.097870416  | 8.643978954 | 4.267601117  | 8.77836E-05 | 0.007005617 | 1.272710311  |
| ILMN_2214355 | 0.097869593  | 6.543851181 | 3.778686537  | 0.000420267 | 0.01841059  | -0.188448986 |
| ILMN_1798705 | 0.097800414  | 8.716211037 | 3.975846425  | 0.000225656 | 0.01305066  | 0.390127431  |
| ILMN_1713406 | -0.097777052 | 8.336282087 | -5.218665346 | 3.468E-06   | 0.000988122 | 4.318020158  |
| ILMN_2210713 | 0.097758339  | 6.990188826 | 5.14190432   | 4.53214E-06 | 0.001166046 | 4.064830989  |
| ILMN_1728934 | 0.097548201  | 10.36563148 | 3.743648959  | 0.000468683 | 0.019597123 | -0.289626097 |
| ILMN_2377862 | 0.097461321  | 7.906293065 | 3.721934397  | 0.000501331 | 0.020334002 | -0.352071662 |
| ILMN_1682336 | 0.097405863  | 7.018466589 | 3.631372527  | 0.000662589 | 0.023919797 | -0.610317977 |
| ILMN_3231638 | -0.097282649 | 7.788437121 | -3.246059237 | 0.002089537 | 0.048025917 | -1.666582663 |
| ILMN_1675130 | 0.097201396  | 7.106587477 | 3.365542387  | 0.001473587 | 0.038313275 | -1.346786921 |
| ILMN_1708787 | -0.097157534 | 6.527560153 | -4.122176179 | 0.000141012 | 0.009403324 | 0.829076734  |
| ILMN_1701269 | 0.097151578  | 10.91990176 | 3.826683664  | 0.000361689 | 0.016988542 | -0.049024942 |

|              |              |             |              |             |             |              |
|--------------|--------------|-------------|--------------|-------------|-------------|--------------|
| ILMN_1741219 | -0.097142671 | 7.243370215 | -3.747002852 | 0.000463826 | 0.019524851 | -0.279963395 |
| ILMN_2327994 | 0.096958564  | 7.877694774 | 3.396450785  | 0.001344891 | 0.035998816 | -1.262890008 |
| ILMN_1716445 | 0.096808043  | 9.710094884 | 3.753547617  | 0.000454487 | 0.019296654 | -0.26109404  |
| ILMN_1667977 | 0.096763496  | 7.87598747  | 5.017968723  | 6.96697E-06 | 0.001482674 | 3.658303228  |
| ILMN_1694514 | -0.096734481 | 6.798093916 | -3.708686193 | 0.000522312 | 0.020938623 | -0.390071707 |
| ILMN_2367215 | 0.096733243  | 8.953831256 | 3.391490293  | 0.0013648   | 0.03630622  | -1.27638641  |
| ILMN_1710064 | -0.096412025 | 6.052733143 | -3.464019407 | 0.001099749 | 0.031813375 | -1.07785737  |
| ILMN_1915076 | 0.096395757  | 6.374949152 | 3.247043477  | 0.00208359  | 0.047921176 | -1.66397833  |
| ILMN_2061768 | 0.096374248  | 5.620462668 | 4.723059332  | 1.91549E-05 | 0.002740187 | 2.703716891  |
| ILMN_1797522 | -0.096373323 | 9.338908942 | -3.839006399 | 0.000347968 | 0.016592727 | -0.013077994 |
| ILMN_3282436 | -0.096372474 | 9.636964824 | -3.459634436 | 0.001114272 | 0.032039724 | -1.089932172 |
| ILMN_1658685 | -0.096330707 | 5.72376934  | -3.635517162 | 0.000654231 | 0.023868572 | -0.598577441 |
| ILMN_1788462 | 0.096224239  | 9.767439541 | 3.85065055   | 0.000335464 | 0.016287503 | 0.020945618  |
| ILMN_1685774 | 0.0961959    | 11.2321337  | 3.463242668  | 0.001102308 | 0.031813375 | -1.07999693  |
| ILMN_1743711 | 0.096185424  | 8.799743019 | 3.906867016  | 0.000280943 | 0.014794866 | 0.185965228  |
| ILMN_1685679 | -0.096167768 | 7.037923805 | -4.995560188 | 7.52802E-06 | 0.001524397 | 3.585115969  |
| ILMN_1764970 | -0.096122811 | 9.031091731 | -4.138562095 | 0.000133722 | 0.009075194 | 0.878705569  |
| ILMN_1746561 | -0.095957567 | 9.35507481  | -4.879705695 | 1.12183E-05 | 0.002046353 | 3.208379719  |
| ILMN_1797318 | 0.095936934  | 7.588091256 | 3.631907673  | 0.000661504 | 0.023919797 | -0.608802493 |
| ILMN_1671906 | 0.095869271  | 8.23171575  | 3.530465944  | 0.000900588 | 0.028380862 | -0.893771267 |
| ILMN_1786718 | 0.095788841  | 10.08506444 | 3.519824759  | 0.000929984 | 0.029015515 | -0.923391326 |
| ILMN_2045729 | 0.095751769  | 9.02096458  | 3.668218007  | 0.000591744 | 0.022468038 | -0.505679947 |
| ILMN_1701289 | 0.095592709  | 8.383383115 | 3.254161666  | 0.002041053 | 0.047307602 | -1.645128306 |
| ILMN_1743241 | -0.095559383 | 7.429252584 | -3.546168846 | 0.000858823 | 0.027517453 | -0.849965875 |
| ILMN_1780667 | 0.09554555   | 8.102366742 | 3.376151516  | 0.001428149 | 0.037442953 | -1.318043071 |
| ILMN_1708059 | 0.09545611   | 6.612322187 | 3.952913396  | 0.000242754 | 0.013412175 | 0.322049566  |
| ILMN_2129273 | 0.095342249  | 6.794773694 | 3.457072256  | 0.001122842 | 0.032178793 | -1.096983339 |
| ILMN_1772124 | -0.095251892 | 7.905462812 | -3.854051083 | 0.000331895 | 0.016238578 | 0.030892054  |
| ILMN_1815190 | 0.09525165   | 7.766688732 | 4.23003086   | 9.92792E-05 | 0.007326296 | 1.157423524  |
| ILMN_1691418 | -0.095248988 | 6.015237344 | -3.741684374 | 0.00047155  | 0.019645076 | -0.29528395  |
| ILMN_1787923 | -0.095155903 | 7.990188311 | -3.792904316 | 0.000402025 | 0.018023696 | -0.147247112 |
| ILMN_1657983 | -0.095121782 | 8.205448842 | -4.575859098 | 3.15103E-05 | 0.003670097 | 2.234931288  |
| ILMN_1698715 | 0.095059013  | 6.978505793 | 5.905653966  | 3.05361E-07 | 0.000206424 | 6.621066928  |
| ILMN_1802646 | -0.095001082 | 5.62997933  | -3.555037436 | 0.000836059 | 0.027090208 | -0.825175478 |
| ILMN_1810418 | 0.094943596  | 6.766561836 | 4.270889691  | 8.68413E-05 | 0.006982696 | 1.28282329   |
| ILMN_3276822 | 0.0949146    | 6.700760752 | 3.91658928   | 0.000272426 | 0.014527246 | 0.214630043  |
| ILMN_2049766 | 0.094884875  | 7.162144079 | 3.496235336  | 0.000998449 | 0.030259518 | -0.98886466  |
| ILMN_1734830 | -0.094855911 | 6.273340911 | -3.679682891 | 0.000571223 | 0.022053177 | -0.47299938  |
| ILMN_1797005 | -0.094730986 | 9.381350127 | -3.893141257 | 0.000293407 | 0.015188451 | 0.145559335  |
| ILMN_1718271 | -0.094653927 | 8.50807691  | -3.508474905 | 0.000962347 | 0.029543969 | -0.954925813 |
| ILMN_1695362 | -0.094637103 | 7.648269942 | -3.580781565 | 0.0007732   | 0.025830261 | -0.753008858 |
| ILMN_1737195 | 0.094551571  | 9.0586709   | 3.886178255  | 0.000299932 | 0.015384685 | 0.125089855  |
| ILMN_2403965 | 0.094487647  | 7.315687917 | 3.688651258  | 0.000555648 | 0.021645781 | -0.447395341 |
| ILMN_1786108 | 0.094483756  | 6.541233892 | 3.626279089  | 0.000672999 | 0.024223018 | -0.624735754 |
| ILMN_1701882 | 0.094480434  | 7.893749686 | 3.905601357  | 0.000282071 | 0.014801647 | 0.182236303  |
| ILMN_1747935 | -0.094457507 | 8.156604102 | -4.232971595 | 9.8329E-05  | 0.007309774 | 1.166430744  |
| ILMN_3187852 | -0.094421077 | 9.630296933 | -4.149410026 | 0.000129099 | 0.008901603 | 0.911612336  |
| ILMN_1743204 | -0.094355993 | 6.696148495 | -4.24123408  | 9.57063E-05 | 0.007251799 | 1.191753206  |
| ILMN_1717173 | 0.094230148  | 9.055677698 | 3.44295969   | 0.001171181 | 0.033168616 | -1.135764934 |
| ILMN_1751773 | 0.094187445  | 7.174381759 | 4.092573154  | 0.00015517  | 0.010071639 | 0.739654459  |
| ILMN_1710150 | 0.09413793   | 7.049956004 | 4.745962788  | 1.77195E-05 | 0.002588545 | 2.77714542   |
| ILMN_1775759 | 0.094075394  | 7.746171966 | 3.371685722  | 0.001447112 | 0.037853276 | -1.330149284 |
| ILMN_1695946 | -0.093987687 | 8.595334158 | -3.441389297 | 0.001176681 | 0.033170292 | -1.140074483 |
| ILMN_1781281 | 0.09398673   | 6.702514257 | 4.226582131  | 0.000100405 | 0.007349386 | 1.146863985  |

|              |              |             |              |             |             |              |
|--------------|--------------|-------------|--------------|-------------|-------------|--------------|
| ILMN_2399310 | 0.093944797  | 7.05055913  | 3.272324671  | 0.001936202 | 0.045720888 | -1.596910599 |
| ILMN_1699737 | 0.093791042  | 8.908790451 | 4.236222444  | 9.72888E-05 | 0.007309774 | 1.176391119  |
| ILMN_1771738 | 0.093527262  | 7.554359386 | 5.304366494  | 2.56948E-06 | 0.000820235 | 4.601868533  |
| ILMN_2413644 | 0.093412964  | 5.945822603 | 3.306160687  | 0.001754317 | 0.042713153 | -1.506631617 |
| ILMN_1765523 | -0.093308047 | 7.1158952   | -3.601582641 | 0.000725735 | 0.025095744 | -0.694478909 |
| ILMN_2392546 | 0.093287363  | 10.91638617 | 3.350509303  | 0.001540328 | 0.03948278  | -1.387420839 |
| ILMN_3307930 | 0.093205049  | 12.34740456 | 3.910949243  | 0.000277336 | 0.014709914 | 0.197996666  |
| ILMN_1790625 | 0.093125247  | 9.523980712 | 3.954718685  | 0.000241364 | 0.01339979  | 0.327401431  |
| ILMN_1678300 | 0.093042325  | 9.174469051 | 3.433833563  | 0.001203489 | 0.033496112 | -1.160792653 |
| ILMN_2097185 | -0.093015141 | 7.90336422  | -3.509725198 | 0.00095873  | 0.029485439 | -0.951454945 |
| ILMN_3305871 | 0.092911538  | 6.858198686 | 3.846030619  | 0.000340372 | 0.016412138 | 0.007439905  |
| ILMN_1745217 | -0.092843025 | 8.509882894 | -4.255994427 | 9.11892E-05 | 0.007161366 | 1.237045461  |
| ILMN_1759175 | 0.092758674  | 6.883298574 | 4.177675359  | 0.000117769 | 0.008293606 | 0.997543436  |
| ILMN_2100458 | 0.092742651  | 6.719360877 | 3.785811469  | 0.000411028 | 0.01828095  | -0.167811992 |
| ILMN_1670821 | 0.092721981  | 6.17475528  | 4.235259158  | 9.75959E-05 | 0.007309774 | 1.173439315  |
| ILMN_3206242 | 0.092662631  | 7.38224721  | 3.328578588  | 0.001642852 | 0.040976769 | -1.44649566  |
| ILMN_1663390 | 0.092612458  | 10.32550312 | 3.286512675  | 0.001857863 | 0.044480336 | -1.55912671  |
| ILMN_1746948 | -0.09255967  | 7.200817563 | -3.464258254 | 0.001098963 | 0.031813375 | -1.077199397 |
| ILMN_1755749 | 0.092555118  | 10.965638   | 4.331073632  | 7.12386E-05 | 0.006248444 | 1.468507533  |
| ILMN_1722089 | 0.092493309  | 7.619406197 | 3.99862311   | 0.000209829 | 0.012374946 | 0.457936999  |
| ILMN_1746699 | 0.092477373  | 7.76776525  | 3.491012588  | 0.001014245 | 0.030512298 | -1.003325259 |
| ILMN_1675038 | -0.092396465 | 8.060327569 | -4.060037185 | 0.000172321 | 0.010801677 | 0.64173078   |
| ILMN_3185161 | 0.092346418  | 6.903837656 | 4.781019095  | 1.57244E-05 | 0.002407453 | 2.889779382  |
| ILMN_2347917 | 0.092291927  | 8.305680315 | 4.085839968  | 0.000158578 | 0.010161946 | 0.719358577  |
| ILMN_1739103 | 0.09215513   | 6.763199341 | 3.853819884  | 0.000332136 | 0.016238578 | 0.030215659  |
| ILMN_3305304 | 0.092123228  | 9.246338618 | 4.243859487  | 9.48872E-05 | 0.007244749 | 1.199804103  |
| ILMN_1703946 | 0.092018041  | 8.504248876 | 3.253800691  | 0.00204319  | 0.047307602 | -1.646084859 |
| ILMN_1745904 | -0.091969083 | 10.72793863 | -3.351118687 | 0.001537567 | 0.039441351 | -1.385775891 |
| ILMN_1651433 | 0.091867166  | 8.086261462 | 3.607911724  | 0.000711856 | 0.024854261 | -0.67663149  |
| ILMN_1669424 | 0.091806685  | 11.80404463 | 3.567757382  | 0.000804414 | 0.026488041 | -0.789556392 |
| ILMN_1898692 | 0.091592105  | 6.279318107 | 4.844599041  | 1.2653E-05  | 0.002206412 | 3.094789     |
| ILMN_1723124 | -0.091535932 | 6.99305156  | -3.842002886 | 0.000344708 | 0.01650513  | -0.004327614 |
| ILMN_2311089 | 0.091511021  | 7.284058783 | 3.636934457  | 0.000651397 | 0.023868572 | -0.594560913 |
| ILMN_1754178 | 0.09148847   | 10.43994563 | 3.816932207  | 0.000372915 | 0.017257196 | -0.077427591 |
| ILMN_1685258 | 0.09146999   | 10.63855008 | 4.098622611  | 0.000152169 | 0.00996623  | 0.757903068  |
| ILMN_2384536 | 0.091352614  | 8.082153293 | 3.705596628  | 0.000527324 | 0.020993104 | -0.398922768 |
| ILMN_1658695 | 0.091322993  | 8.046686856 | 3.428204984  | 0.001223835 | 0.033808453 | -1.176208535 |
| ILMN_1815012 | -0.091320754 | 8.664126614 | -3.771160096 | 0.000430244 | 0.018728635 | -0.210226081 |
| ILMN_2048636 | 0.09127943   | 7.645361708 | 3.790072237  | 0.000405597 | 0.018089735 | -0.155460881 |
| ILMN_2400874 | 0.091207885  | 9.201289233 | 3.748325981  | 0.000461923 | 0.019468525 | -0.276150104 |
| ILMN_1677906 | 0.091189518  | 9.433026339 | 4.524611098  | 3.74267E-05 | 0.003994805 | 2.07305978   |
| ILMN_1733937 | 0.09099438   | 7.646217725 | 3.362134865  | 0.00148847  | 0.038553688 | -1.35600722  |
| ILMN_1900270 | 0.090848739  | 6.401474752 | 3.24512498   | 0.002095197 | 0.048091883 | -1.66905427  |
| ILMN_1765558 | -0.090838935 | 7.628369439 | -3.459723191 | 0.001113976 | 0.032039724 | -1.089687861 |
| ILMN_1722674 | 0.090790745  | 6.699466109 | 3.96716017   | 0.000231991 | 0.013154782 | 0.36431844   |
| ILMN_2261784 | 0.090729782  | 8.136969936 | 3.844571365  | 0.000341937 | 0.016418694 | 0.003175762  |
| ILMN_1783546 | -0.090657319 | 8.003032723 | -3.278191269 | 0.001903438 | 0.045121052 | -1.581299921 |
| ILMN_2379469 | 0.090616491  | 11.18543483 | 4.408239747  | 5.51805E-05 | 0.005226381 | 1.708227504  |
| ILMN_1754179 | -0.090591428 | 8.30519787  | -4.73948392  | 1.81145E-05 | 0.002633698 | 2.756361293  |
| ILMN_1768969 | 0.090542321  | 7.446225794 | 3.649082994  | 0.000627578 | 0.023365408 | -0.560096305 |
| ILMN_2128750 | -0.090427545 | 10.87378624 | -4.657679626 | 2.39093E-05 | 0.0030305   | 2.494819989  |
| ILMN_3234756 | 0.090421022  | 7.036300446 | 3.744771329  | 0.000467052 | 0.019597123 | -0.286393031 |
| ILMN_3179620 | 0.090406793  | 6.460924823 | 4.565340232  | 3.26448E-05 | 0.003739076 | 2.201648276  |
| ILMN_1692790 | 0.090382604  | 8.579601874 | 3.690736751  | 0.000552085 | 0.021556245 | -0.441436423 |



|              |              |             |              |             |             |              |
|--------------|--------------|-------------|--------------|-------------|-------------|--------------|
| ILMN_1756542 | -0.090344356 | 6.823393305 | -3.811821267 | 0.000378932 | 0.017435104 | -0.092298567 |
| ILMN_2178226 | 0.090327671  | 5.761470798 | 3.980396684  | 0.000222404 | 0.012952056 | 0.403658701  |
| ILMN_1805827 | -0.090301517 | 12.81968424 | -3.826923345 | 0.000361417 | 0.016988542 | -0.04832635  |
| ILMN_3307266 | 0.090183389  | 7.157898806 | 4.624264151  | 2.67677E-05 | 0.003272499 | 2.388470466  |
| ILMN_1673991 | 0.090175209  | 10.46295498 | 3.590069897  | 0.00075165  | 0.025581318 | -0.726897556 |
| ILMN_2325394 | 0.09016368   | 6.413411088 | 4.202392481  | 0.000108657 | 0.007788072 | 1.072909125  |
| ILMN_1781419 | 0.090137194  | 8.999328921 | 3.552638388  | 0.00084216  | 0.027262249 | -0.831885113 |
| ILMN_3272768 | 0.090119915  | 6.624887584 | 5.296918294  | 2.63744E-06 | 0.000834206 | 4.577152653  |
| ILMN_2110829 | 0.090066063  | 9.062340334 | 4.546465496  | 3.47815E-05 | 0.003868152 | 2.142001281  |
| ILMN_2350114 | -0.090064528 | 6.477650175 | -3.767265157 | 0.000435495 | 0.018838317 | -0.2214865   |
| ILMN_1766637 | 0.089844997  | 8.528574068 | 3.965148231  | 0.000233482 | 0.013195954 | 0.358344537  |
| ILMN_1733757 | 0.089843143  | 10.38151971 | 3.234661605  | 0.002159584 | 0.049075527 | -1.696704282 |
| ILMN_2141259 | 0.089827241  | 6.809435194 | 5.095505811  | 5.32538E-06 | 0.001274985 | 3.912298783  |
| ILMN_1761531 | -0.089744642 | 7.048732444 | -4.956666345 | 8.60928E-06 | 0.001667491 | 3.458327851  |
| ILMN_2179837 | 0.08966518   | 10.82074589 | 3.73727799   | 0.000478044 | 0.019732794 | -0.307968067 |
| ILMN_1766185 | 0.089639124  | 8.206930228 | 3.771329395  | 0.000430017 | 0.018728635 | -0.209736489 |
| ILMN_1788149 | -0.089582974 | 5.956010188 | -3.546235147 | 0.000858651 | 0.027517453 | -0.849780678 |
| ILMN_1664167 | 0.089514164  | 10.25886212 | 4.340534548  | 6.90484E-05 | 0.006166537 | 1.497800437  |
| ILMN_1815882 | 0.089405633  | 6.880174958 | 3.952919171  | 0.00024275  | 0.013412175 | 0.322066682  |
| ILMN_1736130 | 0.089314035  | 7.127000602 | 3.620793364  | 0.000684386 | 0.024488264 | -0.640251061 |
| ILMN_1703005 | -0.089199912 | 10.44196314 | -3.24863521  | 0.002074006 | 0.047830793 | -1.659765478 |
| ILMN_1690352 | -0.089152147 | 8.411518814 | -3.259429671 | 0.002010102 | 0.046877323 | -1.631160853 |
| ILMN_1744046 | 0.089110426  | 7.48543954  | 3.70995841   | 0.000520261 | 0.020880692 | -0.386425842 |
| ILMN_2359453 | -0.089103389 | 10.66598828 | -3.602097305 | 0.000724597 | 0.02508154  | -0.693028276 |
| ILMN_1807243 | 0.089040384  | 7.320598484 | 3.68012476   | 0.000570446 | 0.022047865 | -0.471738694 |
| ILMN_1808354 | 0.089027635  | 6.543876776 | 4.786568787  | 1.54295E-05 | 0.002396152 | 2.907636842  |
| ILMN_2298936 | 0.088980224  | 10.25467939 | 3.754698445  | 0.000452863 | 0.019291319 | -0.257774205 |
| ILMN_1812441 | -0.088944345 | 8.001096042 | -4.041560011 | 0.000182863 | 0.011298192 | 0.586289293  |
| ILMN_1764323 | 0.088928388  | 9.198452706 | 4.519733703  | 3.80433E-05 | 0.004028765 | 2.057691625  |
| ILMN_1658027 | 0.088785504  | 7.18346088  | 3.841573369  | 0.000345173 | 0.01650513  | -0.005582117 |
| ILMN_2222880 | -0.088784192 | 6.836397064 | -3.338129963 | 0.001597429 | 0.040435363 | -1.420796842 |
| ILMN_1807540 | -0.08865247  | 7.603404083 | -3.442229516 | 0.001173736 | 0.033168616 | -1.137768862 |
| ILMN_1815024 | 0.088600117  | 10.93683771 | 3.32237522   | 0.001673005 | 0.041479641 | -1.463161687 |
| ILMN_1722276 | -0.088549179 | 8.935430807 | -3.945919185 | 0.000248214 | 0.013643953 | 0.301326612  |
| ILMN_1774890 | 0.088423146  | 7.438108109 | 4.614848182  | 2.76319E-05 | 0.003354361 | 2.358554991  |
| ILMN_1799367 | 0.08839355   | 10.52338823 | 3.311506821  | 0.001727102 | 0.042349633 | -1.492313811 |
| ILMN_2395240 | 0.088352862  | 7.737161267 | 3.692481639  | 0.000549121 | 0.021537522 | -0.43644928  |
| ILMN_2334204 | 0.08829312   | 6.883614053 | 3.59660062   | 0.000736843 | 0.025277012 | -0.708515076 |
| ILMN_1752270 | 0.088241482  | 6.838127405 | 4.589765236  | 3.00695E-05 | 0.003562459 | 2.278977573  |
| ILMN_3280667 | 0.088137089  | 6.65216831  | 5.066729003  | 5.88456E-06 | 0.001380109 | 3.817897466  |
| ILMN_3228585 | -0.088052264 | 8.42274286  | -3.435908755 | 0.001196069 | 0.033496112 | -1.155105127 |
| ILMN_1801600 | -0.08802934  | 8.147343777 | -3.622116034 | 0.000681624 | 0.024478822 | -0.636511372 |
| ILMN_2396956 | -0.088000963 | 8.230168174 | -3.459831401 | 0.001113615 | 0.032039724 | -1.089389992 |
| ILMN_1658437 | 0.087993713  | 8.967506283 | 3.244519943  | 0.00209887  | 0.04811213  | -1.670654673 |
| ILMN_1687971 | -0.087973652 | 6.275942845 | -3.535200031 | 0.000887797 | 0.02811042  | -0.880576893 |
| ILMN_3248758 | 0.087866124  | 6.366764829 | 4.018920027  | 0.000196634 | 0.011975832 | 0.518526541  |
| ILMN_1693771 | 0.087760792  | 7.76639878  | 3.313234073  | 0.001718396 | 0.042204627 | -1.487684841 |
| ILMN_1738767 | -0.08772946  | 8.400322766 | -4.011494315 | 0.000201366 | 0.012094573 | 0.496341933  |
| ILMN_2332558 | 0.08768534   | 9.264804547 | 3.909933026  | 0.00027823  | 0.014712052 | 0.19500099   |
| ILMN_2168992 | 0.087567305  | 7.435519657 | 4.613288937  | 2.77776E-05 | 0.003360218 | 2.353603348  |
| ILMN_1813240 | 0.08753795   | 10.31536467 | 3.338601393  | 0.001595218 | 0.04040907  | -1.419527225 |
| ILMN_1664608 | -0.087531002 | 8.508846577 | -3.334824786 | 0.001613011 | 0.040600074 | -1.429694916 |
| ILMN_2054145 | 0.08750574   | 8.440683457 | 3.414394209  | 0.001275155 | 0.034835369 | -1.213969148 |
| ILMN_1732725 | 0.087491159  | 7.960481739 | 3.489470534  | 0.001018954 | 0.030580526 | -1.007592395 |

|              |              |             |              |             |             |              |
|--------------|--------------|-------------|--------------|-------------|-------------|--------------|
| ILMN_1671809 | -0.087398657 | 8.469299951 | -3.605120418 | 0.000717945 | 0.024926372 | -0.684504928 |
| ILMN_1797367 | -0.087268098 | 7.058893365 | -3.743073078 | 0.000469522 | 0.019597123 | -0.291284759 |
| ILMN_1693221 | 0.087213622  | 7.609533438 | 3.588493506  | 0.000755266 | 0.025653751 | -0.731331846 |
| ILMN_2386100 | 0.087129741  | 9.046575082 | 3.586667157  | 0.000759477 | 0.025703058 | -0.736467852 |
| ILMN_1669308 | 0.08710429   | 7.241028612 | 4.357398269  | 6.5306E-05  | 0.005933454 | 1.550082399  |
| ILMN_1672759 | -0.087079689 | 8.162982829 | -3.743816307 | 0.000468439 | 0.019597123 | -0.289144074 |
| ILMN_1846771 | -0.086997304 | 6.375978592 | -3.349683403 | 0.001544076 | 0.039520098 | -1.389649944 |
| ILMN_1689968 | -0.086933012 | 6.296840589 | -3.516604704 | 0.000939059 | 0.02914041  | -0.932344054 |
| ILMN_2127477 | 0.086559898  | 7.228713871 | 3.279430926  | 0.001896582 | 0.045001081 | -1.577998994 |
| ILMN_1653553 | 0.086530761  | 6.729792388 | 3.919255789  | 0.000270134 | 0.014438959 | 0.222498303  |
| ILMN_1672553 | 0.086431767  | 5.859541859 | 3.662729221  | 0.000601817 | 0.022725358 | -0.521305414 |
| ILMN_1801378 | 0.08642688   | 8.348091427 | 3.494354377  | 0.001004111 | 0.030366423 | -0.994074087 |
| ILMN_1727300 | -0.086392428 | 7.468962948 | -4.654648893 | 2.41557E-05 | 0.003034838 | 2.485162432  |
| ILMN_1702231 | -0.086279148 | 6.197290273 | -3.899863161 | 0.000287238 | 0.015027045 | 0.16533808   |
| ILMN_1688089 | 0.086247268  | 10.74742542 | 4.027275899  | 0.000191439 | 0.011743844 | 0.543514293  |
| ILMN_2129388 | -0.08624141  | 7.432400372 | -3.571030498 | 0.000796458 | 0.02631408  | -0.780378875 |
| ILMN_1786976 | -0.086220771 | 8.587619334 | -3.537939804 | 0.000880473 | 0.027977144 | -0.872936131 |
| ILMN_1679881 | 0.086126327  | 7.188560734 | 3.337400327  | 0.001600856 | 0.040464478 | -1.422761613 |
| ILMN_2333687 | -0.086109714 | 6.597974131 | -3.850923957 | 0.000335176 | 0.016287503 | 0.021745153  |
| ILMN_1665219 | -0.086102396 | 7.186449874 | -4.301433834 | 7.85473E-05 | 0.006509608 | 1.37691745   |
| ILMN_1668605 | 0.086063104  | 7.037080861 | 4.094621492  | 0.000154148 | 0.010027156 | 0.745831965  |
| ILMN_1751984 | -0.085978064 | 7.973189984 | -5.171620877 | 4.08657E-06 | 0.001100692 | 4.162726345  |
| ILMN_2055165 | -0.085881512 | 11.24431997 | -3.524102343 | 0.000918059 | 0.028760166 | -0.911490871 |
| ILMN_1730799 | -0.085880924 | 7.340899208 | -3.234536776 | 0.002160363 | 0.049075527 | -1.697033805 |
| ILMN_1733690 | 0.085880907  | 6.91600418  | 3.768766645  | 0.000433464 | 0.018773994 | -0.217146953 |
| ILMN_2393544 | -0.085836583 | 7.652228369 | -4.423741807 | 5.24101E-05 | 0.005033123 | 1.756601287  |
| ILMN_1802377 | -0.085820805 | 6.874295034 | -3.635283221 | 0.0006547   | 0.023868572 | -0.599240331 |
| ILMN_2043828 | 0.085792034  | 6.634682857 | 3.606667776  | 0.000714563 | 0.024876348 | -0.680140727 |
| ILMN_1668465 | 0.085734569  | 6.090793778 | 4.112777008  | 0.000145366 | 0.009652032 | 0.800651193  |
| ILMN_3263329 | 0.085578594  | 8.816942479 | 3.275276863  | 0.001919648 | 0.045423334 | -1.589057206 |
| ILMN_2399523 | -0.085565157 | 7.836649947 | -3.504677722 | 0.000973412 | 0.029777598 | -0.965462469 |
| ILMN_1784367 | 0.08547098   | 7.226279907 | 3.645566049  | 0.000634386 | 0.023517303 | -0.570080344 |
| ILMN_3182422 | -0.085396062 | 7.415648336 | -3.409741155 | 0.001292901 | 0.035153044 | -1.226670336 |
| ILMN_1770053 | 0.085395849  | 10.21354195 | 4.210582682  | 0.000105792 | 0.007598501 | 1.097927228  |
| ILMN_1733875 | -0.085394882 | 7.811224776 | -3.843740769 | 0.000342831 | 0.016438711 | 0.000749026  |
| ILMN_1672389 | 0.085369632  | 9.105181039 | 4.397956934  | 5.70964E-05 | 0.005349064 | 1.676179586  |
| ILMN_1740005 | 0.085322335  | 6.181645512 | 3.253960576  | 0.002042243 | 0.047307602 | -1.645661186 |
| ILMN_2061405 | 0.085310432  | 9.813281903 | 3.439962436  | 0.0011817   | 0.03323025  | -1.143989111 |
| ILMN_1814074 | -0.085231063 | 7.334846786 | -3.26108275  | 0.002000481 | 0.046758372 | -1.62677495  |
| ILMN_1755822 | 0.085191211  | 6.52315749  | 4.233022685  | 9.83126E-05 | 0.007309774 | 1.166587254  |
| ILMN_1759954 | 0.085123149  | 11.03951657 | 4.471564181  | 4.46919E-05 | 0.004545129 | 1.906272592  |
| ILMN_1811104 | -0.085108884 | 9.073405271 | -3.773757157 | 0.000426776 | 0.018648314 | -0.202714371 |
| ILMN_2206344 | -0.085063405 | 6.519048067 | -4.647493663 | 2.47474E-05 | 0.003081022 | 2.4623713    |
| ILMN_2412172 | -0.085052138 | 6.932102583 | -3.693692526 | 0.000547073 | 0.021487249 | -0.432987615 |
| ILMN_1772713 | -0.085038775 | 9.535363942 | -3.450527553 | 0.001145018 | 0.032624501 | -1.114980198 |
| ILMN_2174380 | 0.084822232  | 6.297600137 | 3.844757005  | 0.000341738 | 0.016418694 | 0.003718181  |
| ILMN_1694752 | -0.084803384 | 7.069329397 | -4.243551984 | 9.49828E-05 | 0.007244749 | 1.198861017  |
| ILMN_1782439 | -0.084661013 | 10.19497366 | -4.27804065  | 8.48263E-05 | 0.006930029 | 1.304825809  |
| ILMN_2201533 | 0.084621143  | 9.821846228 | 3.636453788  | 0.000652357 | 0.023868572 | -0.595923199 |
| ILMN_3307700 | 0.084519082  | 8.613779351 | 3.320573717  | 0.00168186  | 0.041479641 | -1.467997973 |
| ILMN_1701308 | -0.084379387 | 6.375542286 | -3.619223933 | 0.000687678 | 0.024517462 | -0.644687426 |
| ILMN_2048822 | 0.084166848  | 7.987739817 | 3.775982867  | 0.000423825 | 0.018542887 | -0.196274522 |
| ILMN_1761058 | -0.084102987 | 7.335681071 | -4.322973605 | 7.31674E-05 | 0.006322105 | 1.443450305  |
| ILMN_1786016 | 0.084097975  | 7.078864237 | 4.449472421  | 4.81086E-05 | 0.004779802 | 1.837048822  |

|              |              |             |              |             |             |              |
|--------------|--------------|-------------|--------------|-------------|-------------|--------------|
| ILMN_1677747 | 0.084084024  | 6.347556495 | 3.488611996  | 0.001021584 | 0.030580526 | -1.009967633 |
| ILMN_1655206 | -0.084007166 | 6.955883342 | -4.51284218  | 3.89316E-05 | 0.004079352 | 2.035988434  |
| ILMN_1805658 | 0.083963599  | 9.531574837 | 4.212122215  | 0.000105262 | 0.007592044 | 1.102632437  |
| ILMN_1709479 | 0.083825884  | 10.30830298 | 3.352089428  | 0.00153318  | 0.039387419 | -1.383155124 |
| ILMN_1792748 | -0.083794857 | 6.144422072 | -3.42421833  | 0.001238444 | 0.034129975 | -1.187118128 |
| ILMN_2333865 | -0.083702334 | 7.367843472 | -3.620651165 | 0.000684684 | 0.024488264 | -0.640653066 |
| ILMN_1766000 | 0.083671628  | 8.079880563 | 3.614131536  | 0.000698463 | 0.024596745 | -0.659074711 |
| ILMN_1724907 | 0.083636344  | 8.172696565 | 3.396137036  | 0.001346142 | 0.036004348 | -1.263744007 |
| ILMN_2383419 | 0.083611606  | 6.691453077 | 3.765309745  | 0.000438155 | 0.018882297 | -0.227137291 |
| ILMN_1728059 | 0.08358392   | 7.675855752 | 3.24193592   | 0.002114626 | 0.048408933 | -1.677487599 |
| ILMN_1719256 | 0.083579125  | 10.98632788 | 3.541396725  | 0.000871316 | 0.027788599 | -0.863290411 |
| ILMN_1744268 | -0.083575133 | 8.450240022 | -3.474457088 | 0.001065902 | 0.03116883  | -1.049078443 |
| ILMN_1781001 | 0.083556422  | 6.255321047 | 4.536037094  | 3.60201E-05 | 0.00391472  | 2.109087642  |
| ILMN_1727281 | 0.083553484  | 7.373108918 | 3.730228033  | 0.000488612 | 0.019992792 | -0.328244845 |
| ILMN_2389810 | 0.083549919  | 7.036975926 | 4.440150829  | 4.96256E-05 | 0.004863867 | 1.807882262  |
| ILMN_3309694 | 0.083543705  | 6.608769909 | 4.24541012   | 9.44067E-05 | 0.007244749 | 1.204560226  |
| ILMN_3258795 | -0.083428689 | 8.134017625 | -3.594754224 | 0.000741001 | 0.025369155 | -0.713714206 |
| ILMN_1734153 | -0.083359672 | 7.901925119 | -3.825677733 | 0.000362832 | 0.017019032 | -0.051956659 |
| ILMN_1684771 | 0.083242366  | 9.932249583 | 5.324702001  | 2.39262E-06 | 0.000807064 | 4.669393344  |
| ILMN_2184640 | 0.083220373  | 8.438207727 | 3.455299386  | 0.001128808 | 0.032269314 | -1.101860467 |
| ILMN_1712894 | -0.082972218 | 5.769307687 | -4.544174057 | 3.505E-05   | 0.003881022 | 2.134766593  |
| ILMN_2332691 | -0.082970114 | 5.726568903 | -3.86731534  | 0.000318319 | 0.015904902 | 0.069733618  |
| ILMN_1758173 | 0.0829329    | 9.107964049 | 3.915867563  | 0.00027305  | 0.014527246 | 0.212500895  |
| ILMN_1737360 | -0.0829233   | 5.933497061 | -3.951771588 | 0.000243638 | 0.013439436 | 0.318665261  |
| ILMN_2181125 | -0.082822778 | 7.148499539 | -3.973323648 | 0.000227478 | 0.01305066  | 0.382628711  |
| ILMN_1758672 | 0.082821609  | 6.513335482 | 3.491767999  | 0.001011945 | 0.030469717 | -1.001234492 |
| ILMN_1813836 | 0.082819839  | 11.55781151 | 4.296619403  | 7.98014E-05 | 0.006597683 | 1.362066435  |
| ILMN_1787280 | 0.082811665  | 8.156232987 | 3.59523754   | 0.00073991  | 0.025357001 | -0.712353419 |
| ILMN_1806705 | -0.0827874   | 6.603106889 | -3.481014098 | 0.00104515  | 0.030982443 | -1.030972858 |
| ILMN_2341952 | 0.082774316  | 9.937689774 | 3.671564491  | 0.000585682 | 0.022361007 | -0.496146734 |
| ILMN_1802894 | 0.082692769  | 8.105850678 | 3.580960138  | 0.00077278  | 0.025830261 | -0.752507222 |
| ILMN_3265365 | 0.082644807  | 7.309240054 | 3.728908513  | 0.000490615 | 0.020040789 | -0.332037652 |
| ILMN_2149053 | 0.082626204  | 8.052889189 | 3.832433463  | 0.000355223 | 0.016810019 | -0.032259695 |
| ILMN_1682818 | -0.082587423 | 6.036895035 | -3.654713941 | 0.000616822 | 0.02306461  | -0.544099624 |
| ILMN_1658110 | 0.082474356  | 7.626379394 | 3.824949013  | 0.000363662 | 0.01703351  | -0.054080207 |
| ILMN_2081335 | 0.082468277  | 9.440519939 | 4.129927583  | 0.000137516 | 0.009241749 | 0.852542179  |
| ILMN_2364131 | -0.082420442 | 8.838954643 | -4.314961953 | 7.51252E-05 | 0.006438484 | 1.418686608  |
| ILMN_2189406 | 0.082412999  | 6.306606026 | 3.473026455  | 0.001070482 | 0.031230055 | -1.053026073 |
| ILMN_1813275 | -0.082195498 | 10.06033962 | -3.286104266 | 0.001860075 | 0.044502403 | -1.560215788 |
| ILMN_1767747 | 0.082072801  | 11.16732194 | 4.061661035  | 0.000171423 | 0.010784612 | 0.646609103  |
| ILMN_2224143 | 0.082044854  | 11.33140974 | 3.600033166  | 0.000729173 | 0.02518934  | -0.69884554  |
| ILMN_1719010 | -0.081923695 | 6.77102049  | -3.684834702 | 0.000562226 | 0.021828028 | -0.45829559  |
| ILMN_1666078 | 0.081842125  | 7.427112998 | 4.158250298  | 0.000125446 | 0.008701955 | 0.93845886   |
| ILMN_1750088 | 0.081809059  | 8.257719251 | 3.484046872  | 0.001035682 | 0.03078118  | -1.022591698 |
| ILMN_1728975 | 0.081757633  | 9.406541507 | 4.804829197  | 1.44968E-05 | 0.002349659 | 2.966444723  |
| ILMN_2407799 | 0.081752504  | 6.374703257 | 4.356170924  | 6.55716E-05 | 0.005933454 | 1.546274361  |
| ILMN_1667577 | 0.081696008  | 8.290849641 | 4.330350735  | 7.14087E-05 | 0.006248444 | 1.46627044   |
| ILMN_1762529 | 0.081630602  | 7.058433989 | 3.359071905  | 0.00150197  | 0.038787956 | -1.364290243 |
| ILMN_1704842 | 0.081546983  | 6.070801416 | 3.226333716  | 0.00221216  | 0.049948438 | -1.718670116 |
| ILMN_1808047 | 0.081516946  | 6.950667834 | 3.48810268   | 0.001023148 | 0.030580526 | -1.011376546 |
| ILMN_1678037 | 0.081461881  | 7.767012798 | 3.527094493  | 0.000909804 | 0.028592897 | -0.903161498 |
| ILMN_1659343 | 0.081338253  | 10.95082878 | 4.247954276  | 9.36234E-05 | 0.007224229 | 1.212365394  |
| ILMN_1663383 | 0.081330231  | 6.846656051 | 3.617404226  | 0.000691513 | 0.024552645 | -0.649829878 |
| ILMN_3207933 | 0.081305585  | 9.839309498 | 3.318100357  | 0.001694089 | 0.041747966 | -1.474635234 |

|              |              |             |              |             |             |              |
|--------------|--------------|-------------|--------------|-------------|-------------|--------------|
| ILMN_2043306 | -0.081293709 | 5.970853322 | -3.434372839 | 0.001201556 | 0.033496112 | -1.159314848 |
| ILMN_1745593 | 0.081288177  | 7.464089698 | 3.724302883  | 0.000497667 | 0.020244413 | -0.345270212 |
| ILMN_1660844 | 0.08126418   | 8.236984184 | 4.224095075  | 0.000101224 | 0.007390097 | 1.139251391  |
| ILMN_1805863 | -0.081167071 | 7.372344362 | -3.440220028 | 0.001180792 | 0.03323025  | -1.143282474 |
| ILMN_2054362 | 0.081030312  | 7.511284142 | 4.05136318   | 0.000177194 | 0.011007117 | 0.615688698  |
| ILMN_1784328 | 0.080956568  | 6.665213299 | 3.694720538  | 0.000545339 | 0.021487249 | -0.430048257 |
| ILMN_1680196 | 0.080946933  | 10.993156   | 3.706282072  | 0.000526208 | 0.020981412 | -0.396959445 |
| ILMN_1815306 | -0.08091138  | 7.293170646 | -3.535150635 | 0.000887929 | 0.02811042  | -0.880714619 |
| ILMN_3246391 | 0.080854173  | 7.146862906 | 3.265376607  | 0.001975695 | 0.046398779 | -1.615375975 |
| ILMN_1749709 | -0.080828156 | 10.32534891 | -3.300991238 | 0.001781017 | 0.043301717 | -1.520462376 |
| ILMN_1690252 | 0.080797463  | 7.900762356 | 3.404312026  | 0.001313904 | 0.035472325 | -1.24147656  |
| ILMN_1787511 | 0.080773747  | 7.67059321  | 4.312161052  | 7.58216E-05 | 0.006438484 | 1.410033876  |
| ILMN_1739199 | -0.080746408 | 7.359268692 | -3.608009398 | 0.000711643 | 0.024854261 | -0.676355919 |
| ILMN_1682449 | -0.080700334 | 8.461127668 | -3.74359928  | 0.000468755 | 0.019597123 | -0.28976919  |
| ILMN_2179726 | 0.080691536  | 6.727532067 | 4.682542113  | 2.19786E-05 | 0.002875057 | 2.574133207  |
| ILMN_2411559 | 0.080570292  | 7.212475437 | 4.535305179  | 3.61086E-05 | 0.00391472  | 2.106778724  |
| ILMN_2381603 | 0.080472477  | 6.527529949 | 4.326199317  | 7.23933E-05 | 0.006307263 | 1.453426517  |
| ILMN_1675186 | 0.080395238  | 7.954592689 | 3.74150702   | 0.00047181  | 0.019645076 | -0.295794634 |
| ILMN_1659564 | -0.080360013 | 9.7825274   | -3.78092081  | 0.000417349 | 0.018376139 | -0.18197979  |
| ILMN_1670948 | -0.080339147 | 8.812807803 | -3.831792917 | 0.000355938 | 0.016810019 | -0.034128058 |
| ILMN_1769751 | -0.080255768 | 7.054066529 | -4.003634303 | 0.000206494 | 0.012277821 | 0.472882031  |
| ILMN_1791508 | -0.080255236 | 6.284752762 | -3.714530057 | 0.000512955 | 0.020708017 | -0.37331889  |
| ILMN_1680386 | 0.080168706  | 6.946893529 | 4.805961899  | 1.44408E-05 | 0.002349659 | 2.97009515   |
| ILMN_1696133 | 0.080143027  | 6.850995571 | 3.267318665  | 0.00196458  | 0.04627043  | -1.610217222 |
| ILMN_2221014 | 0.080078787  | 6.324598604 | 3.71165017   | 0.000517546 | 0.020844522 | -0.381576593 |
| ILMN_3248701 | 0.080073891  | 5.966318015 | 3.557982061  | 0.000828629 | 0.026900028 | -0.81693637  |
| ILMN_1802157 | 0.080044194  | 8.260439835 | 5.000485312  | 7.40101E-06 | 0.001514546 | 3.601193035  |
| ILMN_2313821 | 0.080042996  | 8.017745795 | 5.24209744   | 3.19536E-06 | 0.000934754 | 4.395509657  |
| ILMN_1772894 | 0.080041765  | 6.317471789 | 3.677669301  | 0.000574777 | 0.022072726 | -0.478743241 |
| ILMN_3239130 | -0.079994887 | 6.887690391 | -3.989142757 | 0.000216282 | 0.012681172 | 0.429689018  |
| ILMN_1730523 | 0.079993571  | 7.930678436 | 3.322259282  | 0.001673574 | 0.041479641 | -1.463472982 |
| ILMN_3246353 | 0.079957349  | 7.169918263 | 3.480361033  | 0.001047199 | 0.03101653  | -1.032777053 |
| ILMN_3228700 | 0.079954994  | 6.753810593 | 3.868022844  | 0.000317611 | 0.015892516 | 0.071807358  |
| ILMN_1772703 | 0.079912572  | 7.706179104 | 3.583369031  | 0.000767138 | 0.025766729 | -0.745738916 |
| ILMN_1664030 | 0.079804849  | 7.490503007 | 3.432206943  | 0.001209336 | 0.033515316 | -1.16524931  |
| ILMN_1710756 | 0.07978289   | 13.05099861 | 3.496795347  | 0.00099677  | 0.030259518 | -0.987313355 |
| ILMN_3295874 | -0.079700619 | 6.768968205 | -3.283234735 | 0.001875691 | 0.044659066 | -1.56786536  |
| ILMN_1753613 | -0.079675303 | 7.234789364 | -3.389108357 | 0.00137446  | 0.036444246 | -1.282862826 |
| ILMN_3248263 | -0.079643072 | 7.57376143  | -3.89702745  | 0.000289825 | 0.015116513 | 0.156992039  |
| ILMN_1669598 | 0.079614454  | 7.075845759 | 4.670027137  | 2.29306E-05 | 0.002960876 | 2.534189972  |
| ILMN_1778238 | 0.079583496  | 9.702042835 | 4.27209377   | 8.64988E-05 | 0.006982696 | 1.286526928  |
| ILMN_1734826 | 0.079510422  | 10.01109247 | 3.572527827  | 0.000792844 | 0.026270447 | -0.776178872 |
| ILMN_1674706 | 0.079505111  | 8.760990694 | 3.63642907   | 0.000652406 | 0.023868572 | -0.595993251 |
| ILMN_1708513 | -0.079481667 | 5.683599156 | -3.815103284 | 0.000375057 | 0.017295556 | -0.082750314 |
| ILMN_1793476 | -0.079474787 | 8.059651438 | -3.547264644 | 0.000855979 | 0.027502998 | -0.846904747 |
| ILMN_1793371 | -0.079473564 | 8.352824034 | -3.580829517 | 0.000773087 | 0.025830261 | -0.752874157 |
| ILMN_2350801 | -0.079374804 | 6.091863246 | -4.2328743   | 9.83603E-05 | 0.007309774 | 1.166132692  |
| ILMN_2395236 | 0.079362261  | 7.819575602 | 3.452315992  | 0.001138917 | 0.032531321 | -1.110064325 |
| ILMN_1782954 | 0.079319562  | 9.122717301 | 3.395489146  | 0.001348729 | 0.036017653 | -1.26550736  |
| ILMN_2391512 | 0.079107315  | 6.565383725 | 3.268316089  | 0.001958895 | 0.046193477 | -1.607566971 |
| ILMN_1737416 | -0.079064985 | 7.319151182 | -3.263103706 | 0.001988779 | 0.04664296  | -1.621411074 |
| ILMN_2405009 | -0.079034251 | 9.694206071 | -3.366079523 | 0.001471254 | 0.038281484 | -1.345332976 |
| ILMN_1750130 | 0.079019059  | 11.23969926 | 4.002688978  | 0.000207119 | 0.012290255 | 0.470062048  |
| ILMN_1690282 | 0.079003338  | 7.509177298 | 4.086933116  | 0.00015802  | 0.010161946 | 0.722652565  |

|              |              |             |              |             |             |              |
|--------------|--------------|-------------|--------------|-------------|-------------|--------------|
| ILMN_1796968 | 0.078969099  | 7.273116102 | 3.67885387   | 0.000572684 | 0.022062985 | -0.475364416 |
| ILMN_1654518 | -0.078707086 | 6.571464652 | -3.361081296 | 0.001493101 | 0.038607137 | -1.358856865 |
| ILMN_1745110 | -0.078672361 | 9.549561246 | -3.853439782 | 0.000332534 | 0.016238578 | 0.02910368   |
| ILMN_3212373 | 0.078631255  | 9.858827987 | 3.535546663  | 0.000886867 | 0.02811042  | -0.87961048  |
| ILMN_1690138 | 0.078628357  | 7.195187762 | 4.47766294   | 4.37912E-05 | 0.004466704 | 1.925407513  |
| ILMN_2347298 | -0.078580952 | 6.475009641 | -3.373985322 | 0.001437318 | 0.037625635 | -1.323916589 |
| ILMN_1893633 | 0.078527366  | 6.969511068 | 3.474988466  | 0.001064206 | 0.03116883  | -1.047611931 |
| ILMN_1662905 | 0.078507361  | 12.26726838 | 3.749181064  | 0.000460697 | 0.019440632 | -0.273685343 |
| ILMN_2083243 | 0.078502149  | 8.48723459  | 4.251652748  | 9.24959E-05 | 0.007220796 | 1.223715623  |
| ILMN_2246894 | -0.078488641 | 10.1219053  | -3.690361576 | 0.000552724 | 0.021556245 | -0.442508555 |
| ILMN_2414007 | 0.078437045  | 6.757321203 | 4.019993001  | 0.00019596  | 0.011957347 | 0.521733771  |
| ILMN_1755758 | 0.078411645  | 6.84684349  | 3.333350717  | 0.001620006 | 0.040673606 | -1.433661576 |
| ILMN_1653822 | 0.078242257  | 6.814944733 | 4.028389585  | 0.000190756 | 0.011722844 | 0.546846641  |
| ILMN_3306388 | 0.078231077  | 6.678256697 | 4.010053244  | 0.000202297 | 0.012129354 | 0.492039037  |
| ILMN_1668657 | 0.078208555  | 6.905298391 | 4.59906024   | 2.91426E-05 | 0.003488612 | 2.30844726   |
| ILMN_1721977 | 0.078101769  | 8.948922115 | 3.862790095  | 0.00032289  | 0.016040262 | 0.056474523  |
| ILMN_1700232 | 0.078095523  | 8.155791901 | 3.928518997  | 0.000262315 | 0.014219428 | 0.249853271  |
| ILMN_1653836 | -0.078089211 | 6.280263901 | -3.724120461 | 0.000497948 | 0.020244413 | -0.345794146 |
| ILMN_1842850 | -0.078081729 | 6.399931117 | -3.503993666 | 0.000975418 | 0.029812516 | -0.967359911 |
| ILMN_2221673 | 0.078024548  | 9.902959077 | 3.240026998  | 0.002126338 | 0.048535586 | -1.682533116 |
| ILMN_1795865 | -0.077990646 | 7.208198689 | -3.648192174 | 0.000629296 | 0.023404091 | -0.562625713 |
| ILMN_2406501 | 0.077905052  | 7.147168897 | 3.509940134  | 0.00095811  | 0.029485439 | -0.950858199 |
| ILMN_1811574 | -0.077887257 | 8.301683555 | -3.272886764 | 0.00193304  | 0.045677505 | -1.595415671 |
| ILMN_1755910 | -0.077829811 | 6.575995019 | -3.832659753 | 0.000354971 | 0.016810019 | -0.031599605 |
| ILMN_3255144 | 0.077718035  | 6.47117696  | 3.615380029  | 0.000695804 | 0.024558061 | -0.655548479 |
| ILMN_2286024 | 0.077713749  | 5.747320821 | 5.488709304  | 1.34331E-06 | 0.000564779 | 5.216213614  |
| ILMN_1736176 | 0.077656769  | 7.014994795 | 3.853629949  | 0.000332335 | 0.016238578 | 0.029660002  |
| ILMN_1798940 | 0.077607289  | 6.881157459 | 4.087774497  | 0.000157591 | 0.010155363 | 0.725188191  |
| ILMN_3234884 | 0.077488033  | 8.666051852 | 3.37819099   | 0.001419568 | 0.037331073 | -1.312511023 |
| ILMN_1702384 | -0.077393663 | 7.422851444 | -3.284596349 | 0.001868266 | 0.044571665 | -1.564236109 |
| ILMN_2050617 | 0.077362511  | 10.63245265 | 3.231025828  | 0.002182391 | 0.04951251  | -1.706298574 |
| ILMN_1753265 | -0.077333261 | 6.468277715 | -3.647270094 | 0.000631078 | 0.023445107 | -0.565243515 |
| ILMN_2352934 | 0.077310439  | 6.5887728   | 3.631849704  | 0.000661621 | 0.023919797 | -0.608966662 |
| ILMN_2181992 | -0.077286229 | 6.76912353  | -3.39566305  | 0.001348034 | 0.036017653 | -1.265034069 |
| ILMN_1688848 | -0.077165856 | 6.092465537 | -3.321559491 | 0.001677009 | 0.041479641 | -1.465351785 |
| ILMN_1720965 | -0.07713421  | 7.884281005 | -3.289667319 | 0.001840857 | 0.044165193 | -1.550711536 |
| ILMN_1805148 | -0.077031954 | 6.428120905 | -4.53149468  | 3.6573E-05  | 0.003940281 | 2.094760422  |
| ILMN_1813246 | 0.077021741  | 9.378718176 | 3.285259996  | 0.001864657 | 0.044550185 | -1.562466874 |
| ILMN_1798543 | 0.076997558  | 7.45845359  | 3.615543209  | 0.000695457 | 0.024558061 | -0.655087544 |
| ILMN_1723843 | -0.076957245 | 8.337516591 | -3.974324774 | 0.000226753 | 0.01305066  | 0.385604178  |
| ILMN_1755620 | -0.076878492 | 6.813173541 | -3.410615364 | 0.001289549 | 0.035117296 | -1.224284862 |
| ILMN_1698015 | -0.076828392 | 6.189212296 | -4.169976026 | 0.000120755 | 0.008444549 | 0.974109275  |
| ILMN_1655952 | -0.076787833 | 9.166140473 | -3.40273713  | 0.001320057 | 0.035548673 | -1.245768889 |
| ILMN_1749243 | 0.076611613  | 7.439673282 | 3.620290968  | 0.000685438 | 0.024488264 | -0.641671321 |
| ILMN_1653283 | -0.076537693 | 6.972005154 | -3.299229545 | 0.001790204 | 0.043403012 | -1.525172633 |
| ILMN_2162799 | 0.076526978  | 7.112451481 | 4.571097589  | 3.2019E-05  | 0.003707769 | 2.219861587  |
| ILMN_1775823 | -0.076403162 | 7.61742292  | -3.295319552 | 0.001810755 | 0.043749924 | -1.535621149 |
| ILMN_1782633 | 0.076245244  | 10.44958047 | 3.779808701  | 0.000418799 | 0.018393013 | -0.185200089 |
| ILMN_1700378 | 0.075958014  | 7.794192441 | 3.401631011  | 0.001324395 | 0.03556843  | -1.248782855 |
| ILMN_1772743 | 0.075933398  | 8.542248212 | 3.466927038  | 0.001090219 | 0.031665027 | -1.069845623 |
| ILMN_1760933 | 0.075920704  | 7.729166437 | 3.706150672  | 0.000526422 | 0.020981412 | -0.397335833 |
| ILMN_1662417 | 0.075881508  | 8.315637427 | 4.021398827  | 0.000195079 | 0.011924716 | 0.525936573  |
| ILMN_2389528 | 0.075779668  | 6.108071362 | 4.519325317  | 3.80954E-05 | 0.004028765 | 2.056405143  |
| ILMN_1782377 | 0.075656596  | 8.157530126 | 4.111193984  | 0.000146112 | 0.009668604 | 0.795866757  |

|              |              |             |              |             |             |              |
|--------------|--------------|-------------|--------------|-------------|-------------|--------------|
| ILMN_1686835 | 0.075618458  | 6.816222489 | 3.564634579  | 0.000812075 | 0.026563495 | -0.79830789  |
| ILMN_3247906 | -0.075548023 | 8.076962899 | -3.605195665 | 0.000717781 | 0.024926372 | -0.684292723 |
| ILMN_2411794 | -0.075544527 | 8.508564921 | -3.868326224 | 0.000317307 | 0.015892516 | 0.072696645  |
| ILMN_3268403 | -0.075534312 | 5.923421506 | -3.824539936 | 0.000364129 | 0.01703351  | -0.055272195 |
| ILMN_3242462 | 0.075356502  | 6.881228331 | 3.796150935  | 0.000397968 | 0.017958559 | -0.137827007 |
| ILMN_3238452 | -0.075161788 | 7.509117079 | -4.236067062 | 9.73383E-05 | 0.007309774 | 1.17591496   |
| ILMN_2397571 | 0.075104507  | 6.875507995 | 3.262732555  | 0.001990923 | 0.046661507 | -1.622396317 |
| ILMN_1672547 | -0.075070434 | 7.394584235 | -3.394094186 | 0.001354315 | 0.036070429 | -1.2693033   |
| ILMN_2410742 | -0.074999109 | 8.216273899 | -3.487088168 | 0.00102627  | 0.030580526 | -1.014182612 |
| ILMN_1758827 | 0.074966957  | 7.929980088 | 3.889706682  | 0.000296608 | 0.015308195 | 0.135460166  |
| ILMN_1724333 | -0.074953178 | 7.319626576 | -4.256631339 | 9.09991E-05 | 0.007161366 | 1.239001423  |
| ILMN_1678454 | 0.074936405  | 9.454743154 | 3.259581246  | 0.002009218 | 0.046877323 | -1.630758758 |
| ILMN_1729868 | 0.074827121  | 6.962719886 | 4.090434356  | 0.000156245 | 0.010087444 | 0.733205725  |
| ILMN_1783337 | 0.074778737  | 6.847806658 | 3.672166234  | 0.000584599 | 0.022356075 | -0.494432014 |
| ILMN_2224990 | 0.074775767  | 6.33814044  | 4.000826942  | 0.000208356 | 0.012321234 | 0.464508405  |
| ILMN_2191313 | -0.074668205 | 6.159919208 | -4.226755049 | 0.000100348 | 0.007349386 | 1.147393343  |
| ILMN_1780292 | 0.074580965  | 6.065160059 | 4.514633693  | 3.86987E-05 | 0.004079352 | 2.0416291    |
| ILMN_1771903 | 0.074546562  | 10.20930277 | 3.666718037  | 0.000594481 | 0.022547111 | -0.509951369 |
| ILMN_2377430 | -0.074481234 | 7.648642656 | -4.00431985  | 0.000206042 | 0.012277821 | 0.474927283  |
| ILMN_1708029 | -0.074426632 | 5.796381971 | -3.735981547 | 0.00047997  | 0.019769968 | -0.311698418 |
| ILMN_1695962 | -0.074365482 | 7.735067839 | -3.875476195 | 0.000310235 | 0.01567043  | 0.093665688  |
| ILMN_1797499 | 0.074312538  | 7.334307376 | 3.368553077  | 0.001460555 | 0.038118174 | -1.338635588 |
| ILMN_1662364 | 0.074304219  | 9.77174734  | 3.484838032  | 0.001033225 | 0.03075036  | -1.020404588 |
| ILMN_1721034 | -0.07425843  | 6.996372494 | -3.669741748 | 0.000588977 | 0.022452432 | -0.501339833 |
| ILMN_1691131 | 0.074257533  | 8.694917948 | 3.85419261   | 0.000331747 | 0.016238578 | 0.031306115  |
| ILMN_1662161 | -0.0741303   | 6.398687841 | -3.79195855  | 0.000403215 | 0.018033631 | -0.149990446 |
| ILMN_3289262 | 0.074084771  | 9.609777337 | 3.998395003  | 0.000209982 | 0.012374946 | 0.457256933  |
| ILMN_1778611 | 0.074008831  | 8.430149024 | 3.564996361  | 0.000811184 | 0.026563495 | -0.797294243 |
| ILMN_1765923 | 0.073932226  | 6.748244899 | 3.806041458  | 0.000385849 | 0.017642597 | -0.109102869 |
| ILMN_1849941 | -0.073913635 | 6.628758361 | -3.428694394 | 0.001222053 | 0.033786296 | -1.17486872  |
| ILMN_1790461 | 0.073741875  | 10.46785016 | 3.590286738  | 0.000751154 | 0.025581318 | -0.726287508 |
| ILMN_1710979 | 0.073672673  | 7.122279356 | 3.725240628  | 0.000496223 | 0.020221971 | -0.342576681 |
| ILMN_1810838 | 0.073652107  | 10.17687728 | 3.945014729  | 0.000248928 | 0.013643953 | 0.298648188  |
| ILMN_1772706 | -0.073579121 | 7.77093023  | -3.261538631 | 0.001997836 | 0.046728219 | -1.625565168 |
| ILMN_1654861 | -0.073450877 | 7.784018319 | -3.299669829 | 0.001787904 | 0.043393782 | -1.523995589 |
| ILMN_1789627 | -0.073367226 | 6.247496269 | -3.6183371   | 0.000689545 | 0.024533273 | -0.647193782 |
| ILMN_1774990 | 0.073273731  | 8.209855864 | 3.349791178  | 0.001543587 | 0.039520098 | -1.38935908  |
| ILMN_1682996 | 0.073103161  | 6.48038797  | 3.50552416   | 0.000970935 | 0.029728203 | -0.963114305 |
| ILMN_1662184 | 0.073050845  | 6.902235724 | 3.419455755  | 0.001256114 | 0.034506589 | -1.200140932 |
| ILMN_1726512 | -0.072974831 | 5.750645936 | -3.633386546 | 0.000658515 | 0.023919797 | -0.604613802 |
| ILMN_1807074 | 0.072952446  | 12.41159786 | 3.988596549  | 0.000216659 | 0.012681742 | 0.42806254   |
| ILMN_1697544 | -0.072862688 | 6.549149501 | -3.45162357  | 0.001141276 | 0.032558021 | -1.111967765 |
| ILMN_1781257 | 0.072847446  | 7.109016083 | 3.665912256  | 0.000595956 | 0.022553434 | -0.512245559 |
| ILMN_1814247 | -0.072844848 | 8.133791503 | -3.652352728 | 0.000621311 | 0.023182152 | -0.550809175 |
| ILMN_1758895 | -0.072766367 | 5.959236993 | -3.432924918 | 0.001206752 | 0.033515316 | -1.163282341 |
| ILMN_1707534 | 0.072741445  | 7.520500785 | 5.668298295  | 7.1122E-07  | 0.000372997 | 5.819038767  |
| ILMN_1655654 | 0.072525469  | 7.681589028 | 3.542391223  | 0.000868698 | 0.027756468 | -0.860514479 |
| ILMN_1727479 | -0.072480954 | 9.198403553 | -3.546176507 | 0.000858803 | 0.027517453 | -0.849944474 |
| ILMN_1667222 | 0.07246303   | 7.845547765 | 3.247599066  | 0.00208024  | 0.047878028 | -1.662507998 |
| ILMN_1765644 | 0.072453772  | 9.649809853 | 4.001319067  | 0.000208028 | 0.012321234 | 0.465976074  |
| ILMN_1783695 | 0.072384702  | 10.06994638 | 4.106225315  | 0.000148477 | 0.009806326 | 0.780855467  |
| ILMN_1777483 | 0.072324863  | 6.793191658 | 4.639710407  | 2.54071E-05 | 0.003118034 | 2.437594657  |
| ILMN_1676233 | 0.072314795  | 6.565619719 | 4.12667674   | 0.000138972 | 0.009321395 | 0.842698517  |
| ILMN_1794781 | -0.072232542 | 6.90897944  | -4.004085549 | 0.000206196 | 0.012277821 | 0.474228253  |

|              |              |             |              |             |             |              |
|--------------|--------------|-------------|--------------|-------------|-------------|--------------|
| ILMN_1677440 | -0.072219376 | 10.45174419 | -3.538976204 | 0.000877718 | 0.027941103 | -0.870044881 |
| ILMN_1660579 | 0.072201843  | 7.033726994 | 3.393950765  | 0.001354891 | 0.036070429 | -1.26969352  |
| ILMN_1769634 | 0.072184337  | 9.424811436 | 3.463424422  | 0.001101709 | 0.031813375 | -1.079496307 |
| ILMN_1720442 | -0.072133105 | 9.711776661 | -3.73340339  | 0.000483824 | 0.019881202 | -0.319114625 |
| ILMN_1787199 | 0.072110734  | 5.756090017 | 3.384849936  | 0.00139189  | 0.036743347 | -1.294434385 |
| ILMN_1734553 | -0.072074825 | 6.505855862 | -4.4847091   | 4.27726E-05 | 0.004415059 | 1.947528105  |
| ILMN_1666206 | -0.072068082 | 6.701845349 | -3.388389198 | 0.001377389 | 0.036444246 | -1.28481765  |
| ILMN_2375557 | 0.071971528  | 6.017795188 | 3.65238927   | 0.000621241 | 0.023182152 | -0.550705356 |
| ILMN_2061452 | 0.071960666  | 8.406672671 | 3.836439813  | 0.000350784 | 0.016680856 | -0.020570094 |
| ILMN_1708345 | 0.071837161  | 6.267427086 | 3.283497913  | 0.001874254 | 0.044655683 | -1.567163959 |
| ILMN_1815479 | 0.071831885  | 11.76915255 | 3.621769806  | 0.000682346 | 0.024479253 | -0.637490366 |
| ILMN_1694799 | 0.071806996  | 7.960521392 | 3.278043653  | 0.001904256 | 0.045121052 | -1.581692936 |
| ILMN_1761262 | 0.07173785   | 6.502507771 | 3.477030716  | 0.001057711 | 0.031087493 | -1.041974431 |
| ILMN_1740319 | -0.071728894 | 8.118392901 | -3.265725136 | 0.001973696 | 0.046395634 | -1.61445031  |
| ILMN_1741148 | 0.071569816  | 11.24149657 | 4.23146548   | 9.88145E-05 | 0.007316553 | 1.161817289  |
| ILMN_2361807 | -0.071563319 | 6.954242049 | -3.442498004 | 0.001172796 | 0.033168616 | -1.137032039 |
| ILMN_1711543 | 0.071484988  | 7.714510099 | 3.510305956  | 0.000957054 | 0.029485439 | -0.949842486 |
| ILMN_1709623 | -0.071345022 | 6.769464895 | -3.909046409 | 0.000279012 | 0.014730813 | 0.192387687  |
| ILMN_1793146 | 0.071343647  | 7.836729142 | 3.389288419  | 0.001373727 | 0.036444246 | -1.282373342 |
| ILMN_1804479 | 0.071343236  | 10.40331021 | 4.210683215  | 0.000105757 | 0.007598501 | 1.098234459  |
| ILMN_1680659 | -0.071326691 | 6.070393958 | -3.333644904 | 0.001618608 | 0.040672832 | -1.432870017 |
| ILMN_1783973 | -0.071256747 | 6.213538021 | -3.803447998 | 0.000388992 | 0.017715823 | -0.116638692 |
| ILMN_1746252 | 0.07118992   | 10.81670588 | 3.477605573  | 0.001055889 | 0.03106853  | -1.040387217 |
| ILMN_1654690 | 0.071123418  | 8.92939     | 3.364143146  | 0.001479682 | 0.038388161 | -1.35057378  |
| ILMN_1727761 | 0.071070073  | 6.848967664 | 3.750506299  | 0.000458804 | 0.019384459 | -0.269864769 |
| ILMN_1748831 | -0.071040491 | 7.036402371 | -3.694434297 | 0.000545821 | 0.021487249 | -0.43086674  |
| ILMN_1793966 | 0.070915432  | 6.39172861  | 3.796669249  | 0.000397324 | 0.017952992 | -0.136322711 |
| ILMN_1716400 | 0.070902639  | 6.972341492 | 3.388637789  | 0.001376376 | 0.036444246 | -1.284141956 |
| ILMN_1706839 | 0.070830869  | 8.051775505 | 3.690383631  | 0.000552687 | 0.021556245 | -0.442445533 |
| ILMN_1651936 | -0.070801328 | 8.362008434 | -3.524490777 | 0.000916983 | 0.028760166 | -0.910409808 |
| ILMN_2278819 | 0.070791707  | 6.918490101 | 3.577363785  | 0.000781277 | 0.025949231 | -0.762607057 |
| ILMN_2130838 | 0.07076992   | 9.563751763 | 3.286952737  | 0.001855482 | 0.044454198 | -1.55795313  |
| ILMN_1698846 | -0.070767851 | 5.446632417 | -3.276621394 | 0.001912154 | 0.045277069 | -1.585479007 |
| ILMN_1739283 | 0.070708168  | 8.105886125 | 3.570972946  | 0.000796597 | 0.02631408  | -0.780540286 |
| ILMN_1769849 | 0.07059188   | 5.956986653 | 3.966139938  | 0.000232746 | 0.013175935 | 0.361288948  |
| ILMN_1808163 | 0.070583135  | 6.654040639 | 4.237847404  | 9.67729E-05 | 0.007300534 | 1.181371182  |
| ILMN_2194627 | 0.070510605  | 7.63031781  | 3.451487202  | 0.001141741 | 0.032558021 | -1.112342606 |
| ILMN_1760714 | 0.070498924  | 13.40671696 | 3.933564909  | 0.000258148 | 0.014037694 | 0.264768157  |
| ILMN_1756220 | 0.070271588  | 9.88412041  | 3.919345629  | 0.000270057 | 0.014438959 | 0.222763447  |
| ILMN_1696503 | 0.070165836  | 5.995005351 | 3.341054698  | 0.00158376  | 0.040177859 | -1.412918393 |
| ILMN_3238797 | 0.070107528  | 6.616323015 | 3.988045626  | 0.000217041 | 0.012682538 | 0.426422134  |
| ILMN_1700628 | 0.070022878  | 8.914394282 | 3.49683435   | 0.000996653 | 0.030259518 | -0.987205306 |
| ILMN_3237241 | -0.069896106 | 8.244826704 | -3.678524915 | 0.000573264 | 0.022062985 | -0.476302778 |
| ILMN_3235477 | 0.069853259  | 7.238990491 | 3.310182107  | 0.001733808 | 0.042423546 | -1.495862964 |
| ILMN_1766010 | 0.06978552   | 9.713605628 | 3.40605828   | 0.001307113 | 0.035399878 | -1.23671578  |
| ILMN_1761722 | -0.069647612 | 6.721795399 | -3.436334504 | 0.001194552 | 0.033496112 | -1.153938011 |
| ILMN_1737205 | 0.069608684  | 10.47445695 | 3.328386508  | 0.001643777 | 0.040976769 | -1.447011996 |
| ILMN_2396947 | 0.069554487  | 6.802563637 | 3.312091545  | 0.00172415  | 0.042307335 | -1.490746942 |
| ILMN_2095133 | -0.069505762 | 8.352404301 | -4.013459089 | 0.000200103 | 0.012039718 | 0.502209796  |
| ILMN_1769503 | 0.069489701  | 5.950627897 | 4.165079332  | 0.000122693 | 0.008545386 | 0.959215871  |
| ILMN_1755710 | -0.069453797 | 6.443959721 | -3.580044535 | 0.000774935 | 0.025860693 | -0.755079117 |
| ILMN_3276859 | 0.069359623  | 6.856226775 | 3.361890367  | 0.001489544 | 0.038553688 | -1.356668577 |
| ILMN_1734895 | 0.069346762  | 10.45557333 | 3.969443944  | 0.000230309 | 0.013127837 | 0.371101334  |
| ILMN_1713732 | -0.069309661 | 7.408824728 | -3.562849718 | 0.000816486 | 0.026679717 | -0.803307871 |

|              |              |             |              |             |             |              |
|--------------|--------------|-------------|--------------|-------------|-------------|--------------|
| ILMN_1774427 | -0.069030164 | 6.664536029 | -3.311073532 | 0.001729293 | 0.042373212 | -1.493474771 |
| ILMN_2400583 | -0.06897792  | 6.221053913 | -3.690939625 | 0.000551739 | 0.021556245 | -0.440856647 |
| ILMN_1722798 | -0.068965038 | 6.920933643 | -3.579439883 | 0.000776361 | 0.025860693 | -0.756777355 |
| ILMN_3240365 | -0.068959015 | 6.127373729 | -3.488360454 | 0.001022356 | 0.030580526 | -1.010663484 |
| ILMN_1662232 | -0.068907479 | 10.57957775 | -3.615225853 | 0.000696132 | 0.024558061 | -0.655983969 |
| ILMN_2414366 | 0.068640082  | 6.528360207 | 4.147882288  | 0.00012974  | 0.008927988 | 0.906975552  |
| ILMN_1740197 | -0.06863397  | 6.462390215 | -3.853504321 | 0.000332466 | 0.016238578 | 0.029292481  |
| ILMN_1700549 | 0.068578717  | 6.885616731 | 3.923690946  | 0.000266362 | 0.01437401  | 0.235591529  |
| ILMN_1757956 | -0.068471819 | 7.737848    | -3.226311745 | 0.0022123   | 0.049948438 | -1.718728019 |
| ILMN_1677953 | 0.068393927  | 8.51731532  | 3.228721753  | 0.002196961 | 0.049732396 | -1.712375103 |
| ILMN_1733511 | -0.068356624 | 9.799019618 | -3.582308757 | 0.000769616 | 0.025797973 | -0.74871831  |
| ILMN_3251567 | -0.068297069 | 6.775703698 | -3.517460695 | 0.000936638 | 0.02913385  | -0.929964613 |
| ILMN_1660186 | -0.068272689 | 8.751922223 | -3.443864718 | 0.001168023 | 0.033143858 | -1.133280775 |
| ILMN_1686668 | 0.068207863  | 7.342005763 | 4.232814258  | 9.83796E-05 | 0.007309774 | 1.165948762  |
| ILMN_1706571 | -0.068105933 | 6.719258621 | -3.351798057 | 0.001534496 | 0.039391865 | -1.383941806 |
| ILMN_1693559 | -0.068050617 | 6.126789969 | -3.736973464 | 0.000478496 | 0.019732794 | -0.308844364 |
| ILMN_3249963 | 0.068031667  | 6.239203324 | 3.490495537  | 0.001015821 | 0.030533085 | -1.004756154 |
| ILMN_1724009 | 0.068013831  | 7.799938942 | 3.790907489  | 0.00040454  | 0.018065982 | -0.153038775 |
| ILMN_1755235 | 0.068012934  | 8.331260537 | 3.899223111  | 0.00028782  | 0.015034677 | 0.163454015  |
| ILMN_1746368 | -0.0679695   | 7.297648285 | -4.05502549  | 0.00017512  | 0.010897928 | 0.626680787  |
| ILMN_1752027 | -0.067874745 | 7.845224331 | -3.325508197 | 0.001657711 | 0.04123467  | -1.454747034 |
| ILMN_1748481 | 0.067856719  | 7.970755997 | 3.743123012  | 0.000469449 | 0.019597123 | -0.291140944 |
| ILMN_2415949 | -0.067798209 | 8.011595316 | -3.561368357 | 0.000820163 | 0.026725846 | -0.807456545 |
| ILMN_2182198 | 0.067750644  | 9.117460601 | 3.960581575  | 0.000236902 | 0.013280394 | 0.344790788  |
| ILMN_1678546 | -0.067721067 | 9.135787099 | -3.782079514 | 0.000415843 | 0.018351643 | -0.178624024 |
| ILMN_1805992 | -0.067676799 | 9.205907086 | -3.905734708 | 0.000281952 | 0.014801647 | 0.182629156  |
| ILMN_1694486 | 0.067608095  | 6.609585853 | 3.911815908  | 0.000276576 | 0.014692204 | 0.200551797  |
| ILMN_1651504 | -0.067584794 | 7.020902607 | -3.516760564 | 0.000938618 | 0.02914041  | -0.931910829 |
| ILMN_1722953 | -0.06749813  | 6.095271562 | -3.725857432 | 0.000495276 | 0.020207247 | -0.340804802 |
| ILMN_1770978 | 0.067482312  | 5.619437108 | 3.227474112  | 0.00220489  | 0.049866774 | -1.715664334 |
| ILMN_1880012 | -0.067342753 | 6.180205205 | -4.02191591  | 0.000194756 | 0.011924716 | 0.527482605  |
| ILMN_2387599 | -0.067248337 | 11.77283695 | -3.280369855 | 0.001891405 | 0.044909149 | -1.575498309 |
| ILMN_2285112 | -0.067240464 | 9.45943972  | -3.765715201 | 0.000437602 | 0.018882077 | -0.225965726 |
| ILMN_1702124 | -0.06722401  | 8.138659758 | -4.218169796 | 0.000103203 | 0.00745919  | 1.121123015  |
| ILMN_1875342 | -0.067215229 | 7.489628569 | -4.262552794 | 8.92494E-05 | 0.007073475 | 1.257192559  |
| ILMN_1669635 | 0.067171463  | 9.458682579 | 4.201345524  | 0.000109029 | 0.007798497 | 1.069712661  |
| ILMN_1800958 | 0.066950527  | 9.531793648 | 3.975149631  | 0.000226158 | 0.01305066  | 0.388056035  |
| ILMN_1787477 | 0.06685524   | 6.784700874 | 3.51917848   | 0.000931799 | 0.029019604 | -0.925188564 |
| ILMN_1736863 | -0.066715781 | 5.676026796 | -3.541808378 | 0.000870231 | 0.027779712 | -0.862141424 |
| ILMN_1670796 | 0.066714974  | 9.651497843 | 3.921821999  | 0.000267945 | 0.014388912 | 0.230073201  |
| ILMN_2322935 | 0.066679489  | 8.922014958 | 3.851064358  | 0.000335028 | 0.016287503 | 0.022155745  |
| ILMN_1742922 | 0.066632881  | 8.151503348 | 3.68716983   | 0.000558192 | 0.021720357 | -0.45162711  |
| ILMN_2298511 | 0.066630408  | 8.45723373  | 3.438548891  | 0.001186692 | 0.033343425 | -1.14786624  |
| ILMN_1678268 | -0.066594283 | 7.226246459 | -3.961628684 | 0.000236114 | 0.01326011  | 0.34789789   |
| ILMN_3241985 | 0.066558068  | 6.365158977 | 3.784659162  | 0.000412509 | 0.01828095  | -0.171151013 |
| ILMN_1665065 | -0.066532619 | 6.807666396 | -3.770268318 | 0.000431441 | 0.018733435 | -0.212804802 |
| ILMN_1809086 | -0.066521775 | 7.998576443 | -3.794330345 | 0.000400238 | 0.01801027  | -0.143110005 |
| ILMN_1767541 | 0.066477693  | 6.062373741 | 3.810670511  | 0.000380299 | 0.017435104 | -0.095645378 |
| ILMN_1750178 | -0.066442806 | 7.241326729 | -3.677582626 | 0.000574931 | 0.022072726 | -0.478990446 |
| ILMN_1773148 | -0.06629515  | 6.855625053 | -3.357307527 | 0.001509799 | 0.038902714 | -1.369059445 |
| ILMN_2402806 | -0.066263692 | 8.329239167 | -3.247584924 | 0.002080325 | 0.047878028 | -1.662545426 |
| ILMN_1687546 | -0.066263565 | 6.590848609 | -3.331229932 | 0.001630122 | 0.040776416 | -1.439366599 |
| ILMN_2407308 | -0.066200194 | 6.087804109 | -3.713240551 | 0.000515006 | 0.020766484 | -0.37701682  |
| ILMN_1713875 | 0.066194151  | 6.984570751 | 3.314247286  | 0.001713308 | 0.042131238 | -1.484968764 |



|              |              |             |              |             |             |              |
|--------------|--------------|-------------|--------------|-------------|-------------|--------------|
| ILMN_1674128 | 0.066168538  | 7.295817123 | 4.083939144  | 0.000159553 | 0.01020546  | 0.713631825  |
| ILMN_1789732 | -0.066119036 | 7.190356831 | -3.802748021 | 0.000389844 | 0.017731226 | -0.118672146 |
| ILMN_1770732 | 0.066018617  | 10.41735191 | 3.25916731   | 0.002011633 | 0.046877323 | -1.631856813 |
| ILMN_1738819 | 0.06592204   | 9.110634952 | 3.469998001  | 0.001080239 | 0.031454657 | -1.061379452 |
| ILMN_3248575 | 0.065907533  | 6.366202355 | 4.380920876  | 6.04143E-05 | 0.005614129 | 1.623153805  |
| ILMN_1745954 | 0.065765503  | 9.440604124 | 3.529841457  | 0.000902288 | 0.02840848  | -0.895510997 |
| ILMN_3188099 | 0.065713751  | 7.349979962 | 3.863032869  | 0.000322643 | 0.016040262 | 0.05718565   |
| ILMN_2046024 | 0.06568304   | 7.334315061 | 3.916186598  | 0.000272774 | 0.014527246 | 0.213442061  |
| ILMN_1744914 | 0.065604741  | 7.926975297 | 3.690573914  | 0.000552362 | 0.021556245 | -0.441901767 |
| ILMN_1795893 | -0.065568175 | 7.453638816 | -4.146327254 | 0.000130396 | 0.008929994 | 0.902256748  |
| ILMN_1736340 | -0.065567117 | 8.446268738 | -4.086178945 | 0.000158404 | 0.010161946 | 0.720379973  |
| ILMN_1659156 | 0.065535999  | 6.381475056 | 4.229499092  | 9.9452E-05  | 0.007326296 | 1.155795068  |
| ILMN_1665554 | -0.065472814 | 6.731716216 | -3.487305581 | 0.0010256   | 0.030580526 | -1.013581306 |
| ILMN_2163790 | -0.065462639 | 5.714307291 | -3.308135315 | 0.001744218 | 0.042537113 | -1.501344943 |
| ILMN_2069821 | 0.065418714  | 6.303885667 | 3.882020412  | 0.000303895 | 0.015452932 | 0.112875929  |
| ILMN_1779184 | 0.06541314   | 6.575723137 | 4.069329569  | 0.000167243 | 0.010579602 | 0.669659496  |
| ILMN_1700896 | 0.065363639  | 8.699258885 | 3.769368929  | 0.000432651 | 0.018762366 | -0.215405198 |
| ILMN_1740165 | -0.065241613 | 7.584426065 | -3.379095377 | 0.001415779 | 0.037259839 | -1.310057226 |
| ILMN_1691333 | -0.065194564 | 6.389421929 | -3.631523613 | 0.000662282 | 0.023919797 | -0.609890129 |
| ILMN_1663493 | 0.064712462  | 7.638220506 | 3.294173259  | 0.001816822 | 0.043801916 | -1.538682856 |
| ILMN_1698365 | 0.06451328   | 5.905556162 | 3.507772725  | 0.000964384 | 0.029553873 | -0.956874774 |
| ILMN_1810474 | 0.064498365  | 10.47726291 | 3.70731952   | 0.000524523 | 0.020981412 | -0.393987489 |
| ILMN_2369682 | 0.064425606  | 12.64902512 | 3.854843127  | 0.000331069 | 0.016238578 | 0.033209415  |
| ILMN_2231020 | 0.064347605  | 8.699812758 | 3.269323656  | 0.001953167 | 0.04608994  | -1.604889248 |
| ILMN_2139827 | 0.064278633  | 6.494419722 | 3.320888096  | 0.001680311 | 0.041479641 | -1.467154115 |
| ILMN_1666332 | -0.064255908 | 6.906979958 | -3.337242455 | 0.001601599 | 0.040464478 | -1.423186697 |
| ILMN_2319544 | 0.064242177  | 6.139728567 | 3.463722129  | 0.001100728 | 0.031813375 | -1.078676268 |
| ILMN_1654598 | -0.064232514 | 6.784461684 | -3.730847059 | 0.000487675 | 0.019992792 | -0.326465271 |
| ILMN_1747162 | 0.064148987  | 9.333038767 | 3.329654374  | 0.001637675 | 0.040883768 | -1.443603461 |
| ILMN_1665601 | 0.064001475  | 7.153769478 | 3.683017062  | 0.000565384 | 0.02190134  | -0.463484633 |
| ILMN_1774281 | 0.063911006  | 6.20984184  | 3.80438245   | 0.000387856 | 0.01771091  | -0.113923771 |
| ILMN_1670377 | -0.063752102 | 6.558710872 | -3.344276641 | 0.00156883  | 0.039975606 | -1.404234367 |
| ILMN_1791896 | 0.063689695  | 9.98260125  | 3.420645339  | 0.001251678 | 0.034412155 | -1.196889162 |
| ILMN_1714461 | -0.063686207 | 8.581908686 | -3.588551506 | 0.000755133 | 0.025653751 | -0.731168718 |
| ILMN_1764398 | 0.063514873  | 6.952880119 | 4.115433504  | 0.000144122 | 0.00959218  | 0.808681997  |
| ILMN_1695917 | -0.063416836 | 9.133860271 | -3.565796128 | 0.000809218 | 0.026563495 | -0.795053228 |
| ILMN_1785177 | 0.063390611  | 7.109600281 | 3.29255409   | 0.001825424 | 0.04391718  | -1.543006454 |
| ILMN_1791302 | 0.063347114  | 5.413727231 | 4.132604445  | 0.000136329 | 0.009197809 | 0.860650562  |
| ILMN_1689720 | 0.063266856  | 6.837395461 | 3.40243568   | 0.001321238 | 0.035548673 | -1.246590344 |
| ILMN_1658830 | -0.063236906 | 7.297197159 | -3.349218154 | 0.001546192 | 0.039544884 | -1.390905504 |
| ILMN_1787308 | -0.063199182 | 7.499074379 | -3.356960792 | 0.001511342 | 0.038913391 | -1.369996502 |
| ILMN_1741564 | -0.063195444 | 8.096878492 | -3.543315508 | 0.000866272 | 0.027704626 | -0.857934121 |
| ILMN_1709162 | 0.063189432  | 6.238882198 | 3.590109476  | 0.000751559 | 0.025581318 | -0.726786207 |
| ILMN_1699082 | 0.062966325  | 7.642711274 | 3.96195883   | 0.000235866 | 0.01326011  | 0.348877624  |
| ILMN_3188196 | 0.062908124  | 5.65451028  | 3.255247814  | 0.002034635 | 0.04726824  | -1.642249702 |
| ILMN_1679731 | 0.062822108  | 7.707593445 | 3.823293767  | 0.000365554 | 0.017053911 | -0.058902927 |
| ILMN_2090786 | 0.062745705  | 6.199522487 | 3.548545395  | 0.000852666 | 0.027471698 | -0.843326248 |
| ILMN_3262936 | 0.062672977  | 7.718662859 | 3.832143215  | 0.000355547 | 0.016810019 | -0.033106318 |
| ILMN_1670532 | 0.062658366  | 7.726652012 | 3.513801245  | 0.000947028 | 0.029308566 | -0.940134581 |
| ILMN_1776347 | 0.06262765   | 11.11012971 | 3.591045522  | 0.00074942  | 0.025581185 | -0.724152619 |
| ILMN_1673944 | -0.062125394 | 10.05074973 | -3.632691362 | 0.000659918 | 0.023919797 | -0.606582929 |
| ILMN_1781099 | -0.062107173 | 8.614731154 | -3.465969994 | 0.001093347 | 0.031729152 | -1.072483129 |
| ILMN_1670440 | 0.061995471  | 5.63845625  | 3.609196551  | 0.000709069 | 0.024854261 | -0.673006204 |
| ILMN_1705266 | 0.061939396  | 7.110534272 | 3.63646631   | 0.000652332 | 0.023868572 | -0.595887713 |

|              |              |             |              |             |             |              |
|--------------|--------------|-------------|--------------|-------------|-------------|--------------|
| ILMN_1750511 | 0.061781182  | 7.313128224 | 3.434557949  | 0.001200894 | 0.033496112 | -1.158807548 |
| ILMN_1667260 | 0.061701641  | 8.447506948 | 3.299543281  | 0.001788565 | 0.043393782 | -1.524333908 |
| ILMN_1667580 | 0.06165061   | 6.044111338 | 3.469596421  | 0.001081539 | 0.031465937 | -1.0624868   |
| ILMN_1787541 | -0.061639776 | 6.610778665 | -3.230573133 | 0.002185246 | 0.049532246 | -1.707492686 |
| ILMN_1814589 | 0.061504323  | 7.199962661 | 3.403528264  | 0.001316963 | 0.035527081 | -1.243612829 |
| ILMN_2230672 | 0.061463747  | 10.8150929  | 4.241310577  | 9.56823E-05 | 0.007251799 | 1.191987756  |
| ILMN_2075892 | 0.061406469  | 5.774835782 | 3.616827896  | 0.000692733 | 0.024558061 | -0.651458268 |
| ILMN_1817545 | -0.061144837 | 6.080008482 | -3.374556944 | 0.001434893 | 0.037590703 | -1.322366891 |
| ILMN_1730660 | -0.061056162 | 6.511666053 | -3.606439452 | 0.000715062 | 0.024876348 | -0.680784764 |
| ILMN_1830985 | -0.06097738  | 5.98512989  | -3.266162674 | 0.001971189 | 0.046388207 | -1.613288156 |
| ILMN_1700238 | -0.060956778 | 6.866116623 | -3.295262093 | 0.001811058 | 0.043749924 | -1.535774636 |
| ILMN_2372698 | -0.060934223 | 6.02320511  | -3.64362513  | 0.000638174 | 0.023581644 | -0.575587965 |
| ILMN_3248057 | -0.060932438 | 6.076666863 | -4.695110324 | 2.10617E-05 | 0.002858752 | 2.614285839  |
| ILMN_1744147 | 0.060919673  | 10.12961878 | 3.558384003  | 0.00082762  | 0.026892586 | -0.815811422 |
| ILMN_1739164 | 0.060837479  | 5.841738987 | 3.64080765   | 0.00064371  | 0.023684694 | -0.58357999  |
| ILMN_2357382 | 0.060777858  | 6.740874752 | 3.538402406  | 0.000879243 | 0.027963809 | -0.87164567  |
| ILMN_2038772 | -0.060378485 | 11.82934813 | -3.53709808  | 0.000882717 | 0.028022611 | -0.875283925 |
| ILMN_1813641 | -0.060280979 | 7.114734822 | -3.261886048 | 0.001995822 | 0.046712808 | -1.624643148 |
| ILMN_1674658 | 0.060159527  | 5.345731816 | 3.402269943  | 0.001321888 | 0.035548673 | -1.247041958 |
| ILMN_2354649 | 0.060028274  | 7.613953219 | 3.801667789  | 0.000391163 | 0.017767168 | -0.12180986  |
| ILMN_1675542 | 0.059909657  | 9.312797444 | 3.514212191  | 0.000945856 | 0.029298589 | -0.938992832 |
| ILMN_1656378 | 0.059787176  | 7.057486148 | 3.347820309  | 0.001552564 | 0.039678426 | -1.394677186 |
| ILMN_1750092 | -0.05969603  | 6.273360073 | -3.418005876 | 0.00126154  | 0.034601695 | -1.204103297 |
| ILMN_3242638 | 0.059596482  | 6.533511503 | 3.66924947   | 0.00058987  | 0.022452432 | -0.502742115 |
| ILMN_3234735 | 0.059402138  | 6.842951011 | 4.158921099  | 0.000125173 | 0.008700521 | 0.940497071  |
| ILMN_1674908 | -0.059085041 | 6.390540277 | -3.657210725 | 0.00061211  | 0.022963126 | -0.537002177 |
| ILMN_1786426 | 0.059070702  | 6.398607261 | 3.572365824  | 0.000793234 | 0.026270447 | -0.77663334  |
| ILMN_1756352 | -0.059023421 | 8.736712577 | -3.614981275 | 0.000696652 | 0.024558061 | -0.656674792 |
| ILMN_1668408 | 0.059008     | 6.832078705 | 3.435293104  | 0.001198266 | 0.033496112 | -1.156792672 |
| ILMN_1747629 | 0.05898299   | 5.737485163 | 3.383938832  | 0.001395647 | 0.036814323 | -1.296908997 |
| ILMN_1837298 | 0.058946035  | 6.160308233 | 3.534182947  | 0.00089053  | 0.028141074 | -0.883412483 |
| ILMN_2377733 | 0.058870054  | 6.00763885  | 3.362008578  | 0.001489025 | 0.038553688 | -1.356348824 |
| ILMN_3239162 | -0.058835341 | 5.864807066 | -3.324694519 | 0.00166167  | 0.041273595 | -1.456932916 |
| ILMN_1688753 | 0.058734302  | 10.48570961 | 3.456392411  | 0.001125126 | 0.032201321 | -1.098853756 |
| ILMN_1737144 | 0.058718438  | 5.966923819 | 3.982370424  | 0.000221008 | 0.012892524 | 0.409530498  |
| ILMN_1785107 | 0.058678442  | 7.490235155 | 3.523131468  | 0.000920753 | 0.028779579 | -0.914192641 |
| ILMN_3247222 | 0.058448773  | 5.894238494 | 3.441937347  | 0.001174759 | 0.033170292 | -1.138570632 |
| ILMN_1776147 | 0.058319174  | 8.432999532 | 3.717791165  | 0.000507804 | 0.020572336 | -0.363963813 |
| ILMN_1721337 | 0.058211788  | 7.576043369 | 3.784638614  | 0.000412536 | 0.01828095  | -0.171210548 |
| ILMN_1742962 | 0.058204573  | 6.073156708 | 3.405196753  | 0.00131046  | 0.035434825 | -1.239064731 |
| ILMN_1899940 | 0.058003612  | 6.250458606 | 3.591477152  | 0.000748435 | 0.025572898 | -0.722938085 |
| ILMN_1759789 | 0.057898448  | 6.664458115 | 3.341057295  | 0.001583748 | 0.040177859 | -1.412911396 |
| ILMN_1761474 | 0.057796317  | 7.498559688 | 3.582149905  | 0.000769988 | 0.025797973 | -0.749164644 |
| ILMN_1811301 | -0.057679918 | 7.229325132 | -3.405414172 | 0.001309614 | 0.035434825 | -1.238471972 |
| ILMN_2255310 | 0.05761203   | 11.02611257 | 3.819958839  | 0.000369395 | 0.017174075 | -0.068616183 |
| ILMN_3246944 | 0.057554365  | 6.035575315 | 3.66505768   | 0.000597524 | 0.022587987 | -0.51467837  |
| ILMN_3248562 | 0.057426328  | 6.903548659 | 3.459268052  | 0.001115493 | 0.032048122 | -1.090940659 |
| ILMN_1836218 | 0.057406946  | 7.240124504 | 3.357336264  | 0.001509671 | 0.038902714 | -1.368981779 |
| ILMN_1743131 | -0.057329413 | 7.581141544 | -3.68259217  | 0.000566125 | 0.021905426 | -0.464697418 |
| ILMN_1746893 | 0.057003747  | 6.199842473 | 3.30516784   | 0.001759415 | 0.042807059 | -1.50928902  |
| ILMN_3309754 | -0.056942306 | 5.824769429 | -3.293257695 | 0.001821681 | 0.043874554 | -1.541127812 |
| ILMN_1680403 | -0.056941972 | 10.48190051 | -3.235720315 | 0.002152985 | 0.049059024 | -1.693909195 |
| ILMN_1739876 | -0.056941353 | 9.891474369 | -3.599453616 | 0.000730462 | 0.025207406 | -0.700478513 |
| ILMN_1761721 | 0.056727118  | 10.41999883 | 3.290281914  | 0.001837561 | 0.044147562 | -1.54907148  |

|              |              |             |              |             |             |              |
|--------------|--------------|-------------|--------------|-------------|-------------|--------------|
| ILMN_1737805 | 0.056590976  | 5.529743714 | 3.25096648   | 0.002060044 | 0.047633858 | -1.653592903 |
| ILMN_1676159 | 0.056458594  | 9.376409984 | 3.465393168  | 0.001095237 | 0.031757254 | -1.074072583 |
| ILMN_2105573 | 0.056318651  | 6.023865854 | 3.548288987  | 0.000853328 | 0.027471698 | -0.844042729 |
| ILMN_1748607 | 0.05598653   | 5.781067065 | 3.91042576   | 0.000277796 | 0.014711683 | 0.196453455  |
| ILMN_1693843 | 0.055789452  | 5.993364047 | 3.760444012  | 0.000444842 | 0.019051376 | -0.241191465 |
| ILMN_1724504 | 0.05578274   | 9.781236948 | 3.566191315  | 0.000808247 | 0.026563495 | -0.793945774 |
| ILMN_3309869 | 0.054710282  | 5.800399428 | 3.860618604  | 0.000325105 | 0.016125186 | 0.050114887  |
| ILMN_1771815 | -0.054546176 | 10.19335595 | -3.321161647 | 0.001678965 | 0.041479641 | -1.466419808 |
| ILMN_2395092 | 0.054458201  | 5.9530958   | 3.570663008  | 0.000797348 | 0.02631408  | -0.781409526 |
| ILMN_1654365 | 0.054373604  | 5.770406688 | 3.668802044  | 0.000590682 | 0.022452432 | -0.504016538 |
| ILMN_2247296 | -0.054335486 | 5.921463754 | -4.244450319 | 9.47038E-05 | 0.007244749 | 1.201616217  |
| ILMN_1873261 | -0.054329967 | 5.929969504 | -3.307952726 | 0.00174515  | 0.042537113 | -1.501833872 |
| ILMN_1701940 | -0.054323418 | 7.001941146 | -3.265145516 | 0.001977022 | 0.046398779 | -1.615989701 |
| ILMN_1703949 | 0.054318789  | 11.56885388 | 3.254818054  | 0.002037172 | 0.047295313 | -1.643388764 |
| ILMN_1810608 | 0.054159353  | 6.838954293 | 3.437755944  | 0.001189501 | 0.033395135 | -1.150040744 |
| ILMN_1801905 | -0.054158522 | 6.675453208 | -3.25843916  | 0.002015887 | 0.046927571 | -1.633788172 |
| ILMN_1655052 | 0.054123621  | 6.102045191 | 3.365268163  | 0.00147478  | 0.038315384 | -1.347529148 |
| ILMN_3298462 | 0.05389442   | 5.557262389 | 4.237946235  | 9.67416E-05 | 0.007300534 | 1.1816741    |
| ILMN_2173740 | -0.053868762 | 7.362773253 | -3.241104955 | 0.002119717 | 0.048484857 | -1.679684178 |
| ILMN_1738497 | -0.053804066 | 5.905921033 | -3.441571253 | 0.001176043 | 0.033170292 | -1.139575211 |
| ILMN_1765532 | 0.053797577  | 7.495264903 | 3.326105259  | 0.001654812 | 0.041192266 | -1.453142861 |
| ILMN_1749212 | -0.05378794  | 7.075684735 | -3.423465047 | 0.001241223 | 0.034179237 | -1.189178643 |
| ILMN_1806122 | -0.053686862 | 8.218411426 | -3.261973484 | 0.001995316 | 0.046712808 | -1.624411089 |
| ILMN_1738656 | 0.053566903  | 9.319114388 | 4.344388293  | 6.81752E-05 | 0.006106451 | 1.509740343  |
| ILMN_3310401 | -0.053483613 | 5.717793192 | -3.477800991 | 0.00105527  | 0.03106853  | -1.039847619 |
| ILMN_2308689 | 0.053455792  | 7.681956463 | 3.341467032  | 0.001581842 | 0.040177859 | -1.411807331 |
| ILMN_2049642 | 0.053413419  | 10.44110211 | 3.793976459  | 0.000400681 | 0.01801027  | -0.144136755 |
| ILMN_1680682 | 0.053382657  | 6.391217677 | 3.503378692  | 0.000977225 | 0.02981488  | -0.969065542 |
| ILMN_3240117 | -0.053152688 | 10.03712504 | -3.87387671  | 0.000311804 | 0.015706645 | 0.088973048  |
| ILMN_1719857 | -0.053091607 | 5.749521468 | -3.248318664 | 0.002075908 | 0.047840254 | -1.660603388 |
| ILMN_1739454 | 0.052761802  | 7.317376461 | 3.938978126  | 0.000253749 | 0.013842142 | 0.280779613  |
| ILMN_1755911 | 0.05243764   | 6.392163217 | 4.003544135  | 0.000206553 | 0.012277821 | 0.47261304   |
| ILMN_2221336 | 0.051708064  | 6.184475327 | 3.607915249  | 0.000711848 | 0.024854261 | -0.676621545 |
| ILMN_2187746 | 0.051644004  | 6.165204253 | 3.36805953   | 0.001462684 | 0.038144858 | -1.339972158 |
| ILMN_2044645 | -0.051587307 | 6.215111729 | -3.379131603 | 0.001415627 | 0.037259839 | -1.309958928 |
| ILMN_1663024 | 0.051512303  | 5.277934841 | 4.388275129  | 5.89595E-05 | 0.005508642 | 1.646033677  |
| ILMN_2311873 | -0.051255788 | 5.907226564 | -3.58318778  | 0.000767561 | 0.025766729 | -0.746248271 |
| ILMN_1907966 | 0.051222434  | 6.077735411 | 3.613084296  | 0.000700701 | 0.024636243 | -0.662031987 |
| ILMN_1656327 | -0.051128544 | 5.591197549 | -3.434960924 | 0.001199452 | 0.033496112 | -1.157703127 |
| ILMN_1757825 | -0.051063924 | 5.640295739 | -3.314736078 | 0.001710858 | 0.042101033 | -1.483658294 |
| ILMN_1683798 | 0.051004201  | 6.135779362 | 3.837324566  | 0.000349811 | 0.016657556 | -0.017987719 |
| ILMN_1861270 | -0.050970799 | 6.065111977 | -3.407059075 | 0.001303237 | 0.035350425 | -1.233986657 |
| ILMN_2048477 | -0.050613337 | 5.872809379 | -3.256836024 | 0.002025284 | 0.047114511 | -1.638039387 |
| ILMN_1801572 | -0.050506336 | 5.635066496 | -3.878462867 | 0.000307326 | 0.015581419 | 0.102430826  |
| ILMN_1766247 | 0.049839251  | 6.790933682 | 3.477518671  | 0.001056164 | 0.03106853  | -1.040627169 |
| ILMN_1714527 | -0.049684048 | 9.882827743 | -3.428761146 | 0.00122181  | 0.033786296 | -1.17468597  |
| ILMN_1794987 | 0.049666037  | 6.293462547 | 3.487480262  | 0.001025062 | 0.030580526 | -1.013098166 |
| ILMN_2415572 | -0.049400291 | 5.916208828 | -3.387460493 | 0.00138118  | 0.036516535 | -1.287341686 |
| ILMN_1777060 | 0.049396003  | 6.197063807 | 3.493753091  | 0.001005927 | 0.030394687 | -0.995739033 |
| ILMN_1662021 | 0.049054491  | 6.45210051  | 3.389890481  | 0.001371281 | 0.036422403 | -1.280736562 |
| ILMN_2261099 | 0.048481807  | 5.366453395 | 3.412995593  | 0.001280464 | 0.034925074 | -1.217787985 |
| ILMN_1776325 | -0.04844122  | 7.33716615  | -3.43524349  | 0.001198443 | 0.033496112 | -1.15692866  |
| ILMN_3248069 | -0.048280436 | 13.8188129  | -3.515489602 | 0.000942221 | 0.029212243 | -0.93544325  |
| ILMN_1748407 | 0.048122896  | 6.545727881 | 3.332646665  | 0.001623358 | 0.040673606 | -1.435555763 |

|              |              |             |              |             |             |              |
|--------------|--------------|-------------|--------------|-------------|-------------|--------------|
| ILMN_1802766 | 0.048106066  | 6.196486709 | 3.496111771  | 0.00099882  | 0.030259518 | -0.989206932 |
| ILMN_2395981 | -0.047927549 | 6.196732747 | -3.457466279 | 0.00112152  | 0.032172773 | -1.095899184 |
| ILMN_2382558 | 0.047557563  | 6.634568082 | 3.421302099  | 0.001249235 | 0.034372413 | -1.195093592 |
| ILMN_1680703 | 0.047455947  | 10.15743726 | 3.564625019  | 0.000812099 | 0.026563495 | -0.798334675 |
| ILMN_1651310 | 0.047222886  | 5.642809825 | 3.354328408  | 0.001523106 | 0.039187017 | -1.377108621 |
| ILMN_2144352 | 0.047112501  | 6.173444441 | 3.282605992  | 0.001879129 | 0.044661002 | -1.569540894 |
| ILMN_1730791 | 0.047039316  | 6.350791687 | 3.482740016  | 0.001039752 | 0.030848947 | -1.026203767 |
| ILMN_1750469 | -0.046984998 | 5.39683752  | -3.332797395 | 0.00162264  | 0.040673606 | -1.435150258 |
| ILMN_1677815 | -0.04676853  | 5.463738532 | -3.282509254 | 0.001879659 | 0.044661002 | -1.56979867  |
| ILMN_3263072 | -0.046752082 | 5.719879313 | -3.293126278 | 0.00182238  | 0.043874554 | -1.541478718 |
| ILMN_1670715 | -0.046352623 | 5.830224425 | -3.296211153 | 0.001806049 | 0.043694978 | -1.533239248 |
| ILMN_2388090 | 0.046142575  | 5.945175386 | 3.509002009  | 0.000960821 | 0.029523397 | -0.953462639 |
| ILMN_1791078 | 0.045854784  | 5.184898556 | 3.259839411  | 0.002007713 | 0.046877323 | -1.630073876 |
| ILMN_1697512 | -0.045486105 | 5.891820155 | -3.308706744 | 0.001741306 | 0.042537113 | -1.499814682 |
| ILMN_1694414 | 0.04495986   | 5.429101362 | 3.401469119  | 0.001325031 | 0.03556843  | -1.249223931 |
| ILMN_1712530 | 0.044705186  | 8.099304294 | 3.401023338  | 0.001326784 | 0.035569364 | -1.250438395 |
| ILMN_1737498 | 0.044274481  | 6.296437908 | 3.360911479  | 0.001493849 | 0.038607137 | -1.359316128 |
| ILMN_2049672 | -0.044102568 | 5.240342546 | -3.606860484 | 0.000714143 | 0.024876348 | -0.679597134 |
| ILMN_2408764 | -0.043561931 | 5.412848638 | -3.6078665   | 0.000711954 | 0.024854261 | -0.676759081 |
| ILMN_1840894 | 0.043501707  | 6.43633132  | 3.243957774  | 0.002102288 | 0.048158469 | -1.672141512 |
| ILMN_1767433 | 0.042732354  | 6.231968029 | 3.259041184  | 0.002012369 | 0.046877323 | -1.632191371 |
| ILMN_1827968 | -0.042660657 | 6.000497664 | -3.770512431 | 0.000431113 | 0.018733435 | -0.212098944 |
| ILMN_1765729 | 0.042418539  | 6.196997197 | 3.284875923  | 0.001866745 | 0.04456918  | -1.563490814 |
| ILMN_1887128 | 0.042083821  | 6.128285112 | 3.345265505  | 0.001564275 | 0.039910084 | -1.40156806  |
| ILMN_1748141 | 0.042006859  | 6.114728227 | 3.288730076  | 0.001845894 | 0.044255244 | -1.553212215 |
| ILMN_1788625 | 0.041413945  | 6.600990258 | 3.29055447   | 0.001836101 | 0.04414325  | -1.548344098 |
| ILMN_1817251 | 0.041404039  | 5.987983834 | 3.442482185  | 0.001172851 | 0.033168616 | -1.137075452 |
| ILMN_1706758 | -0.041366859 | 5.513888897 | -3.444125662 | 0.001167114 | 0.033143858 | -1.132564449 |
| ILMN_2163187 | 0.040296549  | 5.708989621 | 3.472954277  | 0.001070714 | 0.031230055 | -1.053225211 |
| ILMN_1736234 | 0.039261134  | 8.67760602  | 3.489328395  | 0.001019389 | 0.030580526 | -1.007985662 |
| ILMN_1766565 | -0.039234073 | 5.405055651 | -3.397221108 | 0.001341825 | 0.035944632 | -1.260793046 |
| ILMN_3265439 | -0.038471676 | 5.761816542 | -3.406640019 | 0.001304859 | 0.035366595 | -1.235129464 |
| ILMN_3246292 | 0.03570426   | 13.61234894 | 3.402412885  | 0.001321327 | 0.035548673 | -1.246652457 |

**Supplementary Table S5. List of genes that were significantly differentially expressed following HPV16 early gene depletion in W12 cells.**

| DEGs.siRNA.probeset | DEGs.siRNA.symbol | E6.associated | E7.associated |
|---------------------|-------------------|---------------|---------------|
| ILMN_2301083        | UBE2C             | FALSE         | TRUE          |
| ILMN_1663390        | CDC20             | TRUE          | FALSE         |
| ILMN_1686097        | TOP2A             | TRUE          | FALSE         |
| ILMN_1801939        | CCNB2             | TRUE          | FALSE         |
| ILMN_1751444        | NCAPG             | FALSE         | FALSE         |
| ILMN_1747911        | CDK1              | FALSE         | FALSE         |
| ILMN_1751776        | CKAP2L            | TRUE          | FALSE         |
| ILMN_1684217        | AURKB             | TRUE          | FALSE         |
| ILMN_1714730        | UBE2C             | FALSE         | TRUE          |
| ILMN_1654268        | HMGB2             | FALSE         | FALSE         |
| ILMN_1747016        | CEP55             | FALSE         | FALSE         |
| ILMN_1726720        | NUSAP1            | FALSE         | FALSE         |
| ILMN_2409220        | HMMR              | TRUE          | FALSE         |
| ILMN_3239771        | DLGAP5            | TRUE          | FALSE         |
| ILMN_1670238        | CDC45             | FALSE         | FALSE         |
| ILMN_1683450        | CDCA5             | TRUE          | FALSE         |
| ILMN_1786125        | CCNA2             | TRUE          | FALSE         |
| ILMN_1749829        | DLGAP5            | TRUE          | FALSE         |
| ILMN_1695658        | KIF20A            | FALSE         | FALSE         |
| ILMN_1815184        | ASPM              | TRUE          | FALSE         |
| ILMN_1728934        | PRC1              | TRUE          | FALSE         |
| ILMN_1777564        | MAD2L1            | TRUE          | FALSE         |
| ILMN_1781942        | HMMR              | FALSE         | FALSE         |
| ILMN_2349459        | BIRC5             | FALSE         | TRUE          |
| ILMN_1666305        | CDKN3             | FALSE         | FALSE         |
| ILMN_1801257        | CENPA             | FALSE         | FALSE         |
| ILMN_2075334        | HIST1H4C          | FALSE         | FALSE         |
| ILMN_2196984        | OIP5              | FALSE         | FALSE         |
| ILMN_1789123        | PLK4              | TRUE          | FALSE         |
| ILMN_1678669        | RRM2              | TRUE          | FALSE         |
| ILMN_2202948        | BUB1              | TRUE          | FALSE         |
| ILMN_1670353        | RAD51AP1          | TRUE          | FALSE         |
| ILMN_1809590        | GIN52             | FALSE         | FALSE         |
| ILMN_1802819        | DEPDC1            | FALSE         | FALSE         |
| ILMN_1788166        | TTK               | TRUE          | FALSE         |
| ILMN_2210129        | PRIM1             | FALSE         | FALSE         |
| ILMN_1703906        | HJURP             | FALSE         | FALSE         |
| ILMN_1737728        | CDCA3             | TRUE          | FALSE         |
| ILMN_2357438        | AURKA             | FALSE         | TRUE          |
| ILMN_2409298        | NUSAP1            | TRUE          | FALSE         |
| ILMN_1796949        | TPX2              | FALSE         | FALSE         |
| ILMN_1737195        | CENPK             | TRUE          | FALSE         |

|              |          |       |       |
|--------------|----------|-------|-------|
| ILMN_2368718 | CENPM    | FALSE | FALSE |
| ILMN_1739645 | ANLN     | FALSE | FALSE |
| ILMN_2212909 | MELK     | TRUE  | FALSE |
| ILMN_1693471 | KLHL35   | TRUE  | FALSE |
| ILMN_1712803 | CCNB1    | TRUE  | FALSE |
| ILMN_1680955 | AURKA    | FALSE | TRUE  |
| ILMN_3232696 | DHFR     | FALSE | FALSE |
| ILMN_2051373 | NEK2     | TRUE  | FALSE |
| ILMN_2222008 | KIFC1    | FALSE | FALSE |
| ILMN_2219712 | HMGB2    | TRUE  | FALSE |
| ILMN_2041046 | CKS1B    | TRUE  | FALSE |
| ILMN_2413898 | MCM10    | TRUE  | FALSE |
| ILMN_2042771 | PTTG1    | FALSE | FALSE |
| ILMN_2049021 | PTTG3P   | FALSE | FALSE |
| ILMN_1694502 | PRIM1    | FALSE | FALSE |
| ILMN_1719256 | CKS1B    | TRUE  | FALSE |
| ILMN_2148796 | MND1     | FALSE | FALSE |
| ILMN_1806037 | TK1      | FALSE | FALSE |
| ILMN_1753196 | PTTG1    | FALSE | FALSE |
| ILMN_1731184 | MELK     | TRUE  | FALSE |
| ILMN_1664516 | CENPF    | FALSE | FALSE |
| ILMN_2285996 | KIAA0101 | TRUE  | FALSE |
| ILMN_1651237 | CDT1     | FALSE | FALSE |
| ILMN_1786065 | UHRF1    | FALSE | FALSE |
| ILMN_1664511 | NDC80    | FALSE | FALSE |
| ILMN_1781943 | FAM83D   | FALSE | FALSE |
| ILMN_1761903 | KCNS1    | FALSE | FALSE |
| ILMN_2181432 | PAPL     | FALSE | FALSE |
| ILMN_1710676 | FBXO5    | FALSE | FALSE |
| ILMN_1796589 | TRIP13   | TRUE  | FALSE |
| ILMN_1704537 | PHGDH    | TRUE  | FALSE |
| ILMN_1673721 | EXO1     | TRUE  | FALSE |
| ILMN_1790100 | DDIAS    | TRUE  | FALSE |
| ILMN_1763907 | CENPW    | TRUE  | FALSE |
| ILMN_2160929 | FEN1     | FALSE | FALSE |
| ILMN_1700337 | TROAP    | FALSE | TRUE  |
| ILMN_1794539 | KIF11    | FALSE | FALSE |
| ILMN_1724489 | RFC4     | FALSE | FALSE |
| ILMN_2330861 | SMC4     | FALSE | FALSE |
| ILMN_2362549 | ZWINT    | FALSE | FALSE |
| ILMN_1712452 | KIF20B   | FALSE | FALSE |
| ILMN_1780667 | POC1A    | TRUE  | FALSE |
| ILMN_1756326 | CKS2     | FALSE | FALSE |
| ILMN_1658143 | RFC3     | FALSE | FALSE |
| ILMN_1759277 | OIP5     | FALSE | FALSE |
| ILMN_1711470 | UBE2T    | FALSE | FALSE |

|              |          |       |       |
|--------------|----------|-------|-------|
| ILMN_1778543 | DHFR     | TRUE  | FALSE |
| ILMN_1724407 | TACC3    | FALSE | FALSE |
| ILMN_1727055 | PARPBP   | FALSE | FALSE |
| ILMN_1685916 | KIF2C    | FALSE | FALSE |
| ILMN_2157240 | MNS1     | FALSE | FALSE |
| ILMN_1673673 | PBK      | TRUE  | FALSE |
| ILMN_1671906 | MND1     | TRUE  | FALSE |
| ILMN_1716279 | CENPE    | TRUE  | FALSE |
| ILMN_1720526 | CENPN    | FALSE | FALSE |
| ILMN_2330307 | SLC43A3  | TRUE  | FALSE |
| ILMN_2108357 | RPL39L   | TRUE  | FALSE |
| ILMN_1771593 | RRM1     | FALSE | FALSE |
| ILMN_2143155 | KIF11    | FALSE | FALSE |
| ILMN_1811472 | KIF23    | TRUE  | FALSE |
| ILMN_1773119 | CCNF     | FALSE | FALSE |
| ILMN_1754241 | MEIOB    | TRUE  | FALSE |
| ILMN_2370365 | RFC4     | FALSE | FALSE |
| ILMN_1814281 | SPC25    | FALSE | FALSE |
| ILMN_1808071 | KIF14    | FALSE | FALSE |
| ILMN_2048700 | ATAD2    | TRUE  | FALSE |
| ILMN_1655642 | FANCI    | FALSE | FALSE |
| ILMN_1808591 | UBE2S    | FALSE | TRUE  |
| ILMN_3220769 | CKS1B    | FALSE | FALSE |
| ILMN_1663195 | MCM7     | FALSE | FALSE |
| ILMN_1737184 | CDCA7    | FALSE | FALSE |
| ILMN_2077550 | RACGAP1  | TRUE  | FALSE |
| ILMN_1710428 | CDK1     | FALSE | FALSE |
| ILMN_1737205 | MCM4     | TRUE  | FALSE |
| ILMN_2225718 | CENPE    | TRUE  | FALSE |
| ILMN_1758728 | FANCG    | FALSE | FALSE |
| ILMN_1701882 | NA       | TRUE  | FALSE |
| ILMN_1709294 | CDCA8    | FALSE | FALSE |
| ILMN_1671843 | PSRC1    | FALSE | FALSE |
| ILMN_2392472 | CENPA    | FALSE | FALSE |
| ILMN_2072296 | CKS2     | FALSE | FALSE |
| ILMN_2396982 | BCL2L12  | FALSE | TRUE  |
| ILMN_1775008 | NCAPD2   | FALSE | FALSE |
| ILMN_1657796 | STMN1    | FALSE | FALSE |
| ILMN_1776490 | C17orf53 | FALSE | FALSE |
| ILMN_1712413 | RPL39L   | TRUE  | FALSE |
| ILMN_1740291 | POLQ     | FALSE | FALSE |
| ILMN_1757697 | NEIL3    | TRUE  | FALSE |
| ILMN_2235137 | FANCD2   | TRUE  | FALSE |
| ILMN_1774336 | POLE2    | FALSE | FALSE |
| ILMN_1777233 | E2F2     | TRUE  | FALSE |
| ILMN_1659364 | RFC5     | TRUE  | FALSE |

|              |            |       |       |
|--------------|------------|-------|-------|
| ILMN_1705153 | NEFH       | FALSE | FALSE |
| ILMN_2412384 | CCNE2      | FALSE | FALSE |
| ILMN_1765701 | TUBA1B     | FALSE | FALSE |
| ILMN_1752953 | BCL2L12    | FALSE | TRUE  |
| ILMN_1725260 | CDC25C     | FALSE | FALSE |
| ILMN_1716445 | DTYMK      | TRUE  | FALSE |
| ILMN_2355665 | MTFP1      | FALSE | FALSE |
| ILMN_1798654 | MCM6       | TRUE  | FALSE |
| ILMN_1772910 | GAS1       | TRUE  | TRUE  |
| ILMN_1665559 | CDK2       | FALSE | FALSE |
| ILMN_2072622 | ERVMER34-1 | TRUE  | FALSE |
| ILMN_2368721 | CENPM      | FALSE | FALSE |
| ILMN_2338323 | CDC25B     | FALSE | FALSE |
| ILMN_1781479 | SUV39H1    | FALSE | FALSE |
| ILMN_1728972 | FAM64A     | FALSE | TRUE  |
| ILMN_1695414 | ASF1B      | FALSE | FALSE |
| ILMN_1768816 | TMPO       | FALSE | FALSE |
| ILMN_1683120 | UNG        | FALSE | FALSE |
| ILMN_3228822 | TMEM194A   | FALSE | FALSE |
| ILMN_1711005 | CDC25A     | TRUE  | FALSE |
| ILMN_1731070 | ORC6       | TRUE  | FALSE |
| ILMN_2413650 | STIL       | FALSE | FALSE |
| ILMN_1814122 | MDC1       | TRUE  | FALSE |
| ILMN_1732688 | DUT        | FALSE | FALSE |
| ILMN_2362545 | ZWINT      | FALSE | FALSE |
| ILMN_1771039 | NA         | FALSE | FALSE |
| ILMN_3234884 | KIF22      | TRUE  | FALSE |
| ILMN_1776577 | DSCC1      | FALSE | FALSE |
| ILMN_1806040 | TYMS       | FALSE | FALSE |
| ILMN_1729142 | CENPV      | FALSE | TRUE  |
| ILMN_2407619 | CDC25C     | FALSE | FALSE |
| ILMN_2311089 | BRCA1      | TRUE  | FALSE |
| ILMN_1745420 | PHF19      | FALSE | FALSE |
| ILMN_1658027 | RAD54L     | TRUE  | FALSE |
| ILMN_1668814 | CENPM      | FALSE | FALSE |
| ILMN_1799667 | KIF4A      | TRUE  | FALSE |
| ILMN_2344971 | FOXM1      | TRUE  | FALSE |
| ILMN_1702197 | SAPCD2     | FALSE | FALSE |
| ILMN_1710962 | TMEM97     | FALSE | FALSE |
| ILMN_3306440 | TMEM194A   | FALSE | FALSE |
| ILMN_1713249 | PHF19      | FALSE | FALSE |
| ILMN_2412860 | MCM4       | FALSE | FALSE |
| ILMN_1658407 | SLC43A3    | FALSE | FALSE |
| ILMN_1799516 | DNAJC9     | FALSE | FALSE |
| ILMN_1669479 | MEST       | TRUE  | TRUE  |
| ILMN_2384807 | LRRCC1     | FALSE | FALSE |



|              |          |       |       |
|--------------|----------|-------|-------|
| ILMN_2410038 | FAM111A  | FALSE | FALSE |
| ILMN_1719870 | FAM72D   | TRUE  | FALSE |
| ILMN_1790537 | RMI2     | FALSE | TRUE  |
| ILMN_1717173 | ECT2     | TRUE  | FALSE |
| ILMN_2413899 | MCM10    | TRUE  | FALSE |
| ILMN_1696713 | POLA2    | TRUE  | FALSE |
| ILMN_2251804 | SMC4     | FALSE | FALSE |
| ILMN_2330243 | NUDT1    | FALSE | FALSE |
| ILMN_1782403 | PRR11    | TRUE  | FALSE |
| ILMN_1805828 | VRK1     | TRUE  | FALSE |
| ILMN_1742981 | TUBA1A   | FALSE | FALSE |
| ILMN_1742922 | PRIM2    | TRUE  | FALSE |
| ILMN_1656452 | C16orf59 | FALSE | FALSE |
| ILMN_1746359 | RERG     | FALSE | FALSE |
| ILMN_1653553 | C14orf80 | TRUE  | FALSE |
| ILMN_2148012 | NA       | FALSE | FALSE |
| ILMN_1730825 | SGOL1    | TRUE  | FALSE |
| ILMN_2074258 | BARD1    | FALSE | FALSE |
| ILMN_1779711 | DTL      | FALSE | FALSE |
| ILMN_1735093 | TIMELESS | FALSE | FALSE |
| ILMN_1753063 | KIF15    | FALSE | FALSE |
| ILMN_1736176 | PLK1     | TRUE  | FALSE |
| ILMN_1673820 | HLTF     | FALSE | FALSE |
| ILMN_1779448 | EFHD1    | FALSE | FALSE |
| ILMN_1658695 | NUF2     | TRUE  | FALSE |
| ILMN_1652008 | KNSTRN   | TRUE  | FALSE |
| ILMN_1681503 | MCM2     | FALSE | FALSE |
| ILMN_1666208 | MIS18BP1 | FALSE | FALSE |
| ILMN_1715616 | LRR1     | TRUE  | FALSE |
| ILMN_1674231 | CHAF1B   | FALSE | FALSE |
| ILMN_1700896 | SAP30    | TRUE  | FALSE |
| ILMN_1747630 | DEK      | FALSE | FALSE |
| ILMN_2194828 | PAGR1    | FALSE | FALSE |
| ILMN_1795822 | DIS3L    | FALSE | FALSE |
| ILMN_2224143 | MCM3     | TRUE  | FALSE |
| ILMN_1738027 | BRCA1    | FALSE | FALSE |
| ILMN_1678493 | CHN1     | FALSE | FALSE |
| ILMN_1704702 | MCM7     | TRUE  | FALSE |
| ILMN_1716895 | RPA3     | FALSE | FALSE |
| ILMN_1727540 | C1orf112 | FALSE | FALSE |
| ILMN_1815169 | MCM5     | FALSE | FALSE |
| ILMN_1747078 | HYLS1    | FALSE | FALSE |
| ILMN_1776052 | HMG2     | FALSE | FALSE |
| ILMN_2066756 | NCAPG2   | FALSE | FALSE |
| ILMN_1721868 | KPNA2    | TRUE  | FALSE |
| ILMN_1746699 | SGOL2    | TRUE  | FALSE |

|              |         |       |       |
|--------------|---------|-------|-------|
| ILMN_1751656 | KLF11   | FALSE | FALSE |
| ILMN_1736816 | SKA3    | FALSE | FALSE |
| ILMN_1712389 | NA      | FALSE | FALSE |
| ILMN_1767665 | GPX8    | FALSE | FALSE |
| ILMN_1784860 | RFC3    | FALSE | FALSE |
| ILMN_1732516 | KNTC1   | FALSE | FALSE |
| ILMN_1741801 | CDC7    | FALSE | FALSE |
| ILMN_1785756 | H2AFX   | FALSE | FALSE |
| ILMN_2141807 | KNSTRN  | FALSE | FALSE |
| ILMN_1761486 | BORA    | FALSE | FALSE |
| ILMN_1678037 | HIRIP3  | TRUE  | FALSE |
| ILMN_1657547 | CCDC34  | FALSE | FALSE |
| ILMN_2058141 | HMGN2   | FALSE | TRUE  |
| ILMN_2355738 | INCENP  | FALSE | FALSE |
| ILMN_1787280 | AUNIP   | TRUE  | TRUE  |
| ILMN_1664630 | CHEK1   | FALSE | FALSE |
| ILMN_3251592 | SAPCD2  | FALSE | FALSE |
| ILMN_2167922 | TRMT5   | FALSE | TRUE  |
| ILMN_1755834 | FEN1    | FALSE | FALSE |
| ILMN_1705301 | TEAD4   | TRUE  | FALSE |
| ILMN_2374633 | ZWILCH  | FALSE | FALSE |
| ILMN_1689327 | HMGN2   | FALSE | TRUE  |
| ILMN_1712386 | MIS18A  | FALSE | FALSE |
| ILMN_1767523 | IL17RB  | FALSE | FALSE |
| ILMN_1658010 | CENPI   | FALSE | FALSE |
| ILMN_1754272 | GINS3   | FALSE | FALSE |
| ILMN_1806818 | MCM3    | FALSE | FALSE |
| ILMN_3176989 | HAUS8   | FALSE | FALSE |
| ILMN_1777691 | ARL9    | FALSE | FALSE |
| ILMN_2374778 | DUT     | FALSE | FALSE |
| ILMN_1709484 | BLM     | TRUE  | FALSE |
| ILMN_3243291 | HNRNPA1 | FALSE | FALSE |
| ILMN_2288784 | CCDC34  | FALSE | FALSE |
| ILMN_1678300 | NA      | TRUE  | FALSE |
| ILMN_1766658 | PKMYT1  | TRUE  | FALSE |
| ILMN_1729051 | MSH6    | FALSE | FALSE |
| ILMN_1689001 | CDK4    | FALSE | FALSE |
| ILMN_1753183 | CDCA4   | FALSE | FALSE |
| ILMN_2132161 | KIF18A  | FALSE | FALSE |
| ILMN_2193315 | EFCAB11 | FALSE | FALSE |
| ILMN_3274929 | GPAT2   | FALSE | FALSE |
| ILMN_1707493 | RCC1    | FALSE | FALSE |
| ILMN_2101375 | CCDC77  | FALSE | FALSE |
| ILMN_3253579 | HAUS8   | FALSE | FALSE |
| ILMN_1813028 | CBX5    | FALSE | FALSE |
| ILMN_1708516 | PRTFDC1 | FALSE | FALSE |

|              |           |       |       |
|--------------|-----------|-------|-------|
| ILMN_2202423 | HELLS     | FALSE | FALSE |
| ILMN_1715189 | LHX6      | FALSE | FALSE |
| ILMN_2411190 | SMC2      | FALSE | FALSE |
| ILMN_1651557 | KDELC2    | FALSE | FALSE |
| ILMN_1756550 | NUP62CL   | TRUE  | FALSE |
| ILMN_1736242 | PLEKHG4   | FALSE | FALSE |
| ILMN_1662184 | C5orf34   | TRUE  | FALSE |
| ILMN_3239785 | NA        | FALSE | FALSE |
| ILMN_1756162 | EXOSC8    | FALSE | FALSE |
| ILMN_1682336 | MASTL     | TRUE  | FALSE |
| ILMN_1696975 | USP1      | FALSE | FALSE |
| ILMN_1801913 | PPIH      | FALSE | FALSE |
| ILMN_1748923 | SMC2      | TRUE  | FALSE |
| ILMN_1701603 | ALPL      | FALSE | FALSE |
| ILMN_3246608 | CENPV     | FALSE | TRUE  |
| ILMN_1810901 | RNASEH2A  | FALSE | FALSE |
| ILMN_2414027 | NA        | FALSE | FALSE |
| ILMN_2043452 | FANCE     | FALSE | FALSE |
| ILMN_2395240 | CHEK2     | TRUE  | FALSE |
| ILMN_2215881 | ARHGAP11B | FALSE | FALSE |
| ILMN_1698252 | FANCB     | FALSE | FALSE |
| ILMN_1793360 | NA        | FALSE | FALSE |
| ILMN_1681754 | GGH       | FALSE | FALSE |
| ILMN_1704987 | ZFR2      | FALSE | FALSE |
| ILMN_1709085 | GSG2      | TRUE  | FALSE |
| ILMN_1695357 | SPDL1     | FALSE | FALSE |
| ILMN_1653822 | NEK2      | TRUE  | FALSE |
| ILMN_1651433 | DCK       | TRUE  | FALSE |
| ILMN_2371700 | HAUS7     | TRUE  | FALSE |
| ILMN_1686871 | PARP1     | FALSE | FALSE |
| ILMN_3297996 | NA        | FALSE | FALSE |
| ILMN_1672536 | FBLN1     | FALSE | FALSE |
| ILMN_1721457 | RANBP1    | FALSE | FALSE |
| ILMN_2180371 | FAM216A   | TRUE  | FALSE |
| ILMN_1778845 | FAM111A   | FALSE | FALSE |
| ILMN_1745946 | HAUS1     | FALSE | FALSE |
| ILMN_1874530 | DIAPH3    | FALSE | FALSE |
| ILMN_3243945 | MZT1      | FALSE | FALSE |
| ILMN_1652580 | POLD1     | FALSE | TRUE  |
| ILMN_2103685 | DEPDC1B   | FALSE | FALSE |
| ILMN_1771652 | BAIAP2L2  | FALSE | FALSE |
| ILMN_2151488 | RMI1      | FALSE | FALSE |
| ILMN_1747303 | DDX39A    | FALSE | FALSE |
| ILMN_1668910 | CIDEB     | FALSE | FALSE |
| ILMN_1760201 | DNMT1     | FALSE | FALSE |
| ILMN_1787259 | RNF212    | FALSE | FALSE |

|              |          |       |       |
|--------------|----------|-------|-------|
| ILMN_1711462 | MNS1     | FALSE | FALSE |
| ILMN_1797964 | ARL6IP6  | FALSE | FALSE |
| ILMN_1788701 | PSIP1    | FALSE | FALSE |
| ILMN_2372040 | MTFP1    | FALSE | FALSE |
| ILMN_1688642 | LAMC3    | FALSE | TRUE  |
| ILMN_3265797 | HMGB1    | FALSE | FALSE |
| ILMN_1721901 | CTNNAL1  | FALSE | FALSE |
| ILMN_1658607 | DLEU2L   | FALSE | FALSE |
| ILMN_1666553 | SLC25A19 | FALSE | FALSE |
| ILMN_1786433 | BCCIP    | FALSE | FALSE |
| ILMN_1708101 | LMNB2    | FALSE | FALSE |
| ILMN_2109156 | RANBP1   | FALSE | FALSE |
| ILMN_1663447 | HNRNPA1  | FALSE | FALSE |
| ILMN_1715947 | NA       | FALSE | FALSE |
| ILMN_1749930 | NDC1     | TRUE  | FALSE |
| ILMN_1787477 | CENPO    | TRUE  | FALSE |
| ILMN_1814600 | DEPDC1B  | FALSE | FALSE |
| ILMN_2297626 | PEG10    | TRUE  | FALSE |
| ILMN_1660222 | MTBP     | FALSE | FALSE |
| ILMN_2139816 | GPSM2    | FALSE | FALSE |
| ILMN_3215712 | NA       | FALSE | FALSE |
| ILMN_3212373 | NA       | TRUE  | FALSE |
| ILMN_1660654 | CDCA2    | FALSE | FALSE |
| ILMN_1749875 | NA       | FALSE | FALSE |
| ILMN_1723412 | ASCL2    | TRUE  | FALSE |
| ILMN_1719906 | HADH     | FALSE | FALSE |
| ILMN_1697703 | HPDL     | FALSE | FALSE |
| ILMN_1791002 | SKP2     | TRUE  | FALSE |
| ILMN_1757467 | H1FO     | FALSE | FALSE |
| ILMN_1732150 | KIAA0101 | FALSE | FALSE |
| ILMN_1679134 | NSMCE4A  | FALSE | FALSE |
| ILMN_1694177 | PCNA     | FALSE | FALSE |
| ILMN_2135984 | MASTL    | TRUE  | FALSE |
| ILMN_1797307 | BUB1B    | TRUE  | FALSE |
| ILMN_1732074 | NA       | FALSE | FALSE |
| ILMN_1697998 | MTFR2    | FALSE | FALSE |
| ILMN_1754051 | RMI1     | FALSE | FALSE |
| ILMN_1715437 | CASC5    | FALSE | FALSE |
| ILMN_1742779 | CENPL    | FALSE | FALSE |
| ILMN_2131336 | TMEM194A | FALSE | FALSE |
| ILMN_1667893 | TNS3     | TRUE  | FALSE |
| ILMN_1707858 | H2AFZ    | FALSE | FALSE |
| ILMN_1771224 | SKA1     | FALSE | FALSE |
| ILMN_1679438 | CENPU    | FALSE | FALSE |
| ILMN_1778890 | LRR1     | FALSE | FALSE |
| ILMN_1716400 | FOXMI    | TRUE  | FALSE |

|              |          |       |       |
|--------------|----------|-------|-------|
| ILMN_3265365 | CEP78    | TRUE  | FALSE |
| ILMN_1756572 | COQ2     | FALSE | FALSE |
| ILMN_1796923 | LOC81691 | FALSE | FALSE |
| ILMN_1674411 | CKAP2    | FALSE | FALSE |
| ILMN_1670134 | FADS1    | FALSE | FALSE |
| ILMN_1705231 | SLCO2A1  | FALSE | FALSE |
| ILMN_1803124 | BIRC5    | FALSE | FALSE |
| ILMN_1780699 | THAP11   | FALSE | FALSE |
| ILMN_2130635 | FOXRED2  | FALSE | FALSE |
| ILMN_1758629 | DONSON   | FALSE | FALSE |
| ILMN_1750711 | MYO19    | FALSE | FALSE |
| ILMN_1723971 | SLC29A1  | TRUE  | FALSE |
| ILMN_3191227 | DBF4     | FALSE | FALSE |
| ILMN_2265654 | UBE2C    | FALSE | TRUE  |
| ILMN_1783610 | HELLS    | FALSE | FALSE |
| ILMN_1720114 | GMNN     | FALSE | FALSE |
| ILMN_1721713 | EXOSC9   | TRUE  | FALSE |
| ILMN_1677906 | NA       | TRUE  | FALSE |
| ILMN_1665583 | TUBB     | FALSE | FALSE |
| ILMN_1692790 | ITGB3BP  | TRUE  | TRUE  |
| ILMN_2191436 | POLA1    | FALSE | FALSE |
| ILMN_2136446 | CTNNAL1  | FALSE | FALSE |
| ILMN_3305273 | PSAT1    | TRUE  | FALSE |
| ILMN_1802951 | NUF2     | FALSE | FALSE |
| ILMN_1810228 | TTF2     | TRUE  | FALSE |
| ILMN_3304898 | TUBB     | FALSE | FALSE |
| ILMN_1726574 | CACYBP   | FALSE | FALSE |
| ILMN_2126706 | LMNB1    | FALSE | FALSE |
| ILMN_1756705 | CHTF18   | FALSE | FALSE |
| ILMN_1771903 | NUP37    | TRUE  | FALSE |
| ILMN_2171183 | MIS18A   | FALSE | FALSE |
| ILMN_3307266 | PSMC3IP  | TRUE  | FALSE |
| ILMN_1729112 | CHPT1    | FALSE | FALSE |
| ILMN_1685928 | WDR34    | FALSE | FALSE |
| ILMN_2338963 | SLC29A1  | TRUE  | FALSE |
| ILMN_1765332 | TIMM10   | FALSE | FALSE |
| ILMN_2169089 | C18orf54 | FALSE | FALSE |
| ILMN_1755862 | PFAS     | TRUE  | TRUE  |
| ILMN_1653443 | CDK2     | FALSE | FALSE |
| ILMN_1686920 | CCDC58   | FALSE | FALSE |
| ILMN_1671554 | LPIN1    | FALSE | FALSE |
| ILMN_2137084 | LIN9     | FALSE | FALSE |
| ILMN_1696266 | XRCC3    | FALSE | FALSE |
| ILMN_3297455 | OIP5-AS1 | FALSE | FALSE |
| ILMN_1777066 | NIF3L1   | FALSE | FALSE |
| ILMN_2404906 | SGOL1    | FALSE | FALSE |

|              |            |       |       |
|--------------|------------|-------|-------|
| ILMN_3298582 | PTMA       | FALSE | FALSE |
| ILMN_2155272 | PIF1       | FALSE | FALSE |
| ILMN_3300972 | SIVA1      | FALSE | FALSE |
| ILMN_1743065 | PTPLAD1    | FALSE | FALSE |
| ILMN_2396948 | PSMC3IP    | FALSE | FALSE |
| ILMN_1699623 | FAM81A     | FALSE | FALSE |
| ILMN_1700728 | KRTCAP3    | FALSE | FALSE |
| ILMN_1729115 | UBE2S      | FALSE | FALSE |
| ILMN_3290261 | CACYBP     | FALSE | FALSE |
| ILMN_1814589 | KIF22      | TRUE  | FALSE |
| ILMN_1671933 | GPSM2      | TRUE  | FALSE |
| ILMN_1671766 | F12        | FALSE | FALSE |
| ILMN_1798210 | E2F7       | FALSE | FALSE |
| ILMN_1724062 | LIN54      | FALSE | FALSE |
| ILMN_1670769 | CENPQ      | FALSE | FALSE |
| ILMN_3251423 | CHDH       | TRUE  | FALSE |
| ILMN_2202915 | FAR2       | FALSE | FALSE |
| ILMN_1738681 | NUP62      | FALSE | TRUE  |
| ILMN_3240003 | CHEK2P2    | FALSE | FALSE |
| ILMN_1709953 | DONSON     | FALSE | FALSE |
| ILMN_1672503 | DPYSL2     | FALSE | FALSE |
| ILMN_3215759 | HAUS1      | FALSE | FALSE |
| ILMN_3179891 | NA         | FALSE | FALSE |
| ILMN_1773200 | CCP110     | FALSE | FALSE |
| ILMN_1715508 | NNMT       | FALSE | FALSE |
| ILMN_1682774 | TEX30      | FALSE | FALSE |
| ILMN_2199676 | CEP152     | FALSE | FALSE |
| ILMN_1696046 | SIVA1      | FALSE | FALSE |
| ILMN_3237584 | CHEK2      | FALSE | FALSE |
| ILMN_2091590 | ANKLE1     | FALSE | FALSE |
| ILMN_2200331 | H2AFX      | FALSE | FALSE |
| ILMN_1737398 | PTPLAD1    | FALSE | FALSE |
| ILMN_2334204 | ERCC6L     | TRUE  | FALSE |
| ILMN_1692056 | HS3ST3A1   | FALSE | TRUE  |
| ILMN_1691611 | HNRNPA1P10 | FALSE | FALSE |
| ILMN_1760635 | RAD51C     | TRUE  | FALSE |
| ILMN_2356578 | TH         | FALSE | FALSE |
| ILMN_3246401 | AIF1L      | FALSE | FALSE |
| ILMN_1684802 | TAF5       | FALSE | FALSE |
| ILMN_1751368 | HNRNPD     | FALSE | FALSE |
| ILMN_2238928 | RAD51C     | FALSE | FALSE |
| ILMN_1800619 | BRI3BP     | FALSE | FALSE |
| ILMN_1801766 | CCDC109B   | FALSE | FALSE |
| ILMN_2401436 | PKMYT1     | TRUE  | FALSE |
| ILMN_1682494 | RSRC1      | FALSE | FALSE |
| ILMN_1704750 | TUBB       | FALSE | FALSE |

|              |            |       |       |
|--------------|------------|-------|-------|
| ILMN_1722127 | RAD54B     | FALSE | FALSE |
| ILMN_1656574 | PCGF6      | FALSE | FALSE |
| ILMN_1751963 | ZCWPW1     | FALSE | FALSE |
| ILMN_2117904 | ZNF22      | FALSE | FALSE |
| ILMN_1753582 | RPA2       | FALSE | FALSE |
| ILMN_1657898 | MTFP1      | FALSE | FALSE |
| ILMN_1706779 | LIG1       | FALSE | TRUE  |
| ILMN_1815723 | NUP35      | TRUE  | FALSE |
| ILMN_3291472 | NA         | FALSE | FALSE |
| ILMN_1715991 | SDPR       | FALSE | FALSE |
| ILMN_1880052 | NA         | FALSE | FALSE |
| ILMN_1671603 | MED30      | FALSE | TRUE  |
| ILMN_1806483 | ZWILCH     | FALSE | FALSE |
| ILMN_1719205 | FBL        | FALSE | FALSE |
| ILMN_3205271 | HMGB1      | FALSE | TRUE  |
| ILMN_1652913 | EZH2       | FALSE | FALSE |
| ILMN_1727459 | ORC1       | FALSE | FALSE |
| ILMN_1748427 | ZNF239     | FALSE | FALSE |
| ILMN_2351916 | EXO1       | FALSE | FALSE |
| ILMN_1803005 | MMACHC     | FALSE | FALSE |
| ILMN_2179726 | C16orf93   | TRUE  | FALSE |
| ILMN_1660599 | GPAT2      | FALSE | FALSE |
| ILMN_1665538 | SKP2       | FALSE | FALSE |
| ILMN_1810725 | FAM129A    | TRUE  | FALSE |
| ILMN_2141259 | SPAG5      | TRUE  | FALSE |
| ILMN_1695386 | RAD51C     | TRUE  | TRUE  |
| ILMN_3244640 | SNORD96A   | FALSE | FALSE |
| ILMN_1737947 | LSM5       | FALSE | FALSE |
| ILMN_1676091 | NA         | FALSE | FALSE |
| ILMN_2202940 | CHPT1      | FALSE | FALSE |
| ILMN_1683441 | NCAPD3     | FALSE | FALSE |
| ILMN_1737254 | USP1       | FALSE | FALSE |
| ILMN_1731044 | NA         | FALSE | FALSE |
| ILMN_1798588 | HLTF       | FALSE | FALSE |
| ILMN_3213568 | NA         | FALSE | FALSE |
| ILMN_1734734 | ZNF519     | FALSE | FALSE |
| ILMN_1768969 | LBR        | TRUE  | FALSE |
| ILMN_1674620 | SGCE       | FALSE | TRUE  |
| ILMN_2117171 | LMO4       | FALSE | TRUE  |
| ILMN_1692938 | PSAT1      | TRUE  | FALSE |
| ILMN_1764362 | LYAR       | FALSE | FALSE |
| ILMN_1781257 | ERVMER34-1 | TRUE  | FALSE |
| ILMN_2211800 | HMGB1      | FALSE | TRUE  |
| ILMN_1785198 | POLE3      | FALSE | FALSE |
| ILMN_1700546 | ELOVL6     | TRUE  | FALSE |
| ILMN_1677747 | TMPO       | TRUE  | FALSE |

|              |            |       |       |
|--------------|------------|-------|-------|
| ILMN_1798270 | SMCO4      | FALSE | FALSE |
| ILMN_1684293 | ANP32B     | FALSE | FALSE |
| ILMN_2105923 | RHNO1      | FALSE | FALSE |
| ILMN_1703487 | LMO4       | FALSE | TRUE  |
| ILMN_1739582 | NA         | FALSE | FALSE |
| ILMN_1679880 | THOC6      | FALSE | FALSE |
| ILMN_1675219 | WDHD1      | FALSE | FALSE |
| ILMN_1810418 | LBR        | TRUE  | FALSE |
| ILMN_1669550 | MAD2L2     | FALSE | FALSE |
| ILMN_1654421 | MPHOSPH9   | FALSE | FALSE |
| ILMN_1717403 | ARHGEF39   | FALSE | FALSE |
| ILMN_3294365 | HMGB3      | FALSE | FALSE |
| ILMN_1708672 | ACAT2      | TRUE  | FALSE |
| ILMN_1801387 | YEATS4     | FALSE | FALSE |
| ILMN_1690523 | LRRC20     | FALSE | FALSE |
| ILMN_3234436 | HNRNPA1P33 | FALSE | FALSE |
| ILMN_1661776 | CENPJ      | FALSE | FALSE |
| ILMN_1672553 | SLC43A3    | TRUE  | FALSE |
| ILMN_1768293 | NUP155     | FALSE | FALSE |
| ILMN_1756043 | WDHD1      | FALSE | FALSE |
| ILMN_2056975 | HPRT1      | FALSE | FALSE |
| ILMN_1677273 | TH         | FALSE | FALSE |
| ILMN_1743402 | SIX4       | FALSE | FALSE |
| ILMN_1810100 | PBX3       | FALSE | FALSE |
| ILMN_1748770 | CKAP5      | FALSE | FALSE |
| ILMN_2137625 | GPAT2      | FALSE | FALSE |
| ILMN_1697736 | EXOSC2     | FALSE | FALSE |
| ILMN_1764861 | ISOC1      | FALSE | FALSE |
| ILMN_1751028 | SERPINH1   | FALSE | FALSE |
| ILMN_1667839 | UBR7       | FALSE | FALSE |
| ILMN_1745593 | STMN1      | TRUE  | FALSE |
| ILMN_1749297 | ACTL6A     | FALSE | FALSE |
| ILMN_1731193 | BCL2L12    | FALSE | TRUE  |
| ILMN_1799106 | Mar-01     | TRUE  | FALSE |
| ILMN_1695271 | RPP25      | TRUE  | FALSE |
| ILMN_2176768 | SEPHS1     | FALSE | FALSE |
| ILMN_2135798 | NR2C2AP    | FALSE | FALSE |
| ILMN_1748093 | PAFAH1B3   | FALSE | FALSE |
| ILMN_1669842 | CHAF1A     | FALSE | FALSE |
| ILMN_1669635 | NUP85      | TRUE  | FALSE |
| ILMN_1696183 | HBQ1       | FALSE | FALSE |
| ILMN_2081335 | COA1       | TRUE  | FALSE |
| ILMN_2395236 | CHEK2      | TRUE  | FALSE |
| ILMN_1915076 | NA         | TRUE  | FALSE |
| ILMN_1703754 | CEP192     | FALSE | FALSE |
| ILMN_3304022 | NA         | FALSE | FALSE |



|              |           |       |       |
|--------------|-----------|-------|-------|
| ILMN_2407124 | MCM8      | FALSE | TRUE  |
| ILMN_2364062 | ALYREF    | FALSE | FALSE |
| ILMN_1681340 | HSPB11    | FALSE | FALSE |
| ILMN_1771003 | HAUS4     | FALSE | FALSE |
| ILMN_1762275 | NA        | FALSE | TRUE  |
| ILMN_1687107 | RFWD3     | FALSE | FALSE |
| ILMN_1671905 | SFR1      | FALSE | FALSE |
| ILMN_1772292 | PDCD6IPP2 | FALSE | FALSE |
| ILMN_1757877 | HCFC1R1   | FALSE | FALSE |
| ILMN_1698185 | WDR90     | FALSE | FALSE |
| ILMN_1784467 | NUP210    | FALSE | FALSE |
| ILMN_1726928 | TCEA3     | FALSE | FALSE |
| ILMN_1813938 | CHCHD4    | FALSE | FALSE |
| ILMN_2101885 | TUBB      | FALSE | FALSE |
| ILMN_1720745 | NA        | FALSE | FALSE |
| ILMN_1715661 | TFAM      | FALSE | FALSE |
| ILMN_1811933 | SHMT1     | FALSE | FALSE |
| ILMN_1728199 | POLE      | FALSE | FALSE |
| ILMN_1738147 | NES       | FALSE | FALSE |
| ILMN_1869109 | NUCKS1    | FALSE | FALSE |
| ILMN_1748241 | CENPP     | FALSE | FALSE |
| ILMN_3242205 | GMPS      | FALSE | FALSE |
| ILMN_1756676 | PHF19     | FALSE | FALSE |
| ILMN_1703092 | RECQL4    | FALSE | FALSE |
| ILMN_1727444 | PAGR1     | FALSE | FALSE |
| ILMN_1709483 | MRE11A    | TRUE  | FALSE |
| ILMN_1802157 | THOC1     | TRUE  | FALSE |
| ILMN_1778561 | WEE1      | FALSE | TRUE  |
| ILMN_1726756 | FANCB     | FALSE | FALSE |
| ILMN_1740234 | GSTO2     | FALSE | FALSE |
| ILMN_2111187 | ELOVL6    | TRUE  | FALSE |
| ILMN_2321451 | HNRNPD    | FALSE | FALSE |
| ILMN_1684929 | TOPBP1    | FALSE | FALSE |
| ILMN_1767481 | XRCC6BP1  | FALSE | FALSE |
| ILMN_1757210 | CALML4    | FALSE | FALSE |
| ILMN_1690371 | MRPL11    | TRUE  | FALSE |
| ILMN_1684982 | PDK4      | FALSE | FALSE |
| ILMN_1804735 | CBS       | FALSE | FALSE |
| ILMN_2349393 | MDK       | FALSE | FALSE |
| ILMN_1779264 | PSMG1     | FALSE | FALSE |
| ILMN_1690586 | NA        | FALSE | FALSE |
| ILMN_1750518 | ALYREF    | TRUE  | FALSE |
| ILMN_1662658 | PUS1      | TRUE  | FALSE |
| ILMN_2309534 | RDM1      | FALSE | FALSE |
| ILMN_2396947 | PSMC3IP   | TRUE  | FALSE |
| ILMN_1738093 | RNFT2     | FALSE | FALSE |

|              |            |       |       |
|--------------|------------|-------|-------|
| ILMN_1718807 | SMC3       | FALSE | FALSE |
| ILMN_1750062 | PPARGC1A   | FALSE | TRUE  |
| ILMN_1658464 | GTF3A      | FALSE | FALSE |
| ILMN_2383484 | C19orf48   | FALSE | TRUE  |
| ILMN_1709044 | TGIF2      | FALSE | TRUE  |
| ILMN_1665797 | CSE1L      | FALSE | TRUE  |
| ILMN_1705032 | SEH1L      | FALSE | FALSE |
| ILMN_3249807 | SKA2       | FALSE | FALSE |
| ILMN_1684045 | CDCA4      | FALSE | FALSE |
| ILMN_2399431 | PRPS2      | FALSE | FALSE |
| ILMN_2296843 | GCDH       | FALSE | TRUE  |
| ILMN_1659257 | TNFRSF8    | FALSE | FALSE |
| ILMN_1694268 | HES6       | FALSE | FALSE |
| ILMN_2215656 | MAGOH      | FALSE | FALSE |
| ILMN_1660793 | PAQR4      | FALSE | FALSE |
| ILMN_1682428 | HENMT1     | FALSE | FALSE |
| ILMN_2124951 | RBMX       | FALSE | FALSE |
| ILMN_3181695 | LSM3       | FALSE | FALSE |
| ILMN_1753353 | SLBP       | FALSE | FALSE |
| ILMN_2067370 | SNRPF      | FALSE | FALSE |
| ILMN_1664682 | DNA2       | FALSE | FALSE |
| ILMN_1716006 | C18orf54   | FALSE | FALSE |
| ILMN_1688953 | ARHGAP19   | FALSE | FALSE |
| ILMN_3251404 | NUCKS1     | FALSE | FALSE |
| ILMN_2312719 | EXOSC9     | TRUE  | FALSE |
| ILMN_3276822 | TMPO       | TRUE  | FALSE |
| ILMN_3185161 | CEP78      | TRUE  | FALSE |
| ILMN_1674662 | TICRR      | FALSE | FALSE |
| ILMN_1658678 | SAAL1      | FALSE | FALSE |
| ILMN_1736441 | PDXP       | FALSE | FALSE |
| ILMN_3292224 | NA         | FALSE | FALSE |
| ILMN_1770725 | AIF1L      | FALSE | FALSE |
| ILMN_1767260 | CCDC138    | TRUE  | FALSE |
| ILMN_1785191 | TMEM14A    | FALSE | FALSE |
| ILMN_2376953 | KCNK2      | FALSE | FALSE |
| ILMN_1747924 | NA         | FALSE | FALSE |
| ILMN_1668850 | PCSK9      | FALSE | FALSE |
| ILMN_1667050 | PRPS1      | FALSE | FALSE |
| ILMN_1787324 | ENKD1      | FALSE | FALSE |
| ILMN_2134176 | TXLNG      | FALSE | FALSE |
| ILMN_1768020 | HAUS8      | FALSE | FALSE |
| ILMN_3206242 | GPAT2      | TRUE  | FALSE |
| ILMN_1734486 | TSEN15     | FALSE | FALSE |
| ILMN_3267670 | G2E3       | FALSE | FALSE |
| ILMN_1758293 | UBR7       | FALSE | FALSE |
| ILMN_2220283 | HNRNPA1P10 | FALSE | FALSE |

|              |           |       |       |
|--------------|-----------|-------|-------|
| ILMN_1686835 | ATAD5     | TRUE  | FALSE |
| ILMN_1724493 | LYSMD2    | TRUE  | FALSE |
| ILMN_3177271 | RBMX      | FALSE | FALSE |
| ILMN_3241262 | PABPC4L   | FALSE | FALSE |
| ILMN_1767542 | THAP10    | FALSE | FALSE |
| ILMN_3227811 | HNRNPA1   | FALSE | FALSE |
| ILMN_2043918 | DLEU1     | FALSE | FALSE |
| ILMN_2286334 | U2SURP    | FALSE | FALSE |
| ILMN_1806825 | CEP128    | FALSE | FALSE |
| ILMN_1776582 | PDK3      | FALSE | FALSE |
| ILMN_1788213 | FRAT2     | FALSE | FALSE |
| ILMN_1706238 | CSE1L     | FALSE | FALSE |
| ILMN_2306066 | FUS       | FALSE | FALSE |
| ILMN_2062701 | GAS1      | TRUE  | TRUE  |
| ILMN_1693221 | CENPH     | TRUE  | FALSE |
| ILMN_2322996 | EYA2      | FALSE | FALSE |
| ILMN_3251691 | POLR3G    | TRUE  | FALSE |
| ILMN_1709634 | CMBL      | TRUE  | TRUE  |
| ILMN_1812297 | CYP26B1   | FALSE | FALSE |
| ILMN_1800958 | TMEM237   | TRUE  | FALSE |
| ILMN_3275590 | LSM3      | FALSE | FALSE |
| ILMN_2404385 | REPIN1    | FALSE | FALSE |
| ILMN_2221564 | LYAR      | FALSE | FALSE |
| ILMN_1690252 | ALKBH2    | TRUE  | FALSE |
| ILMN_1792389 | RNF165    | FALSE | FALSE |
| ILMN_1672908 | TWIST1    | TRUE  | FALSE |
| ILMN_2176251 | MGME1     | FALSE | FALSE |
| ILMN_1801391 | SKP2      | FALSE | FALSE |
| ILMN_2334205 | ERCC6L    | FALSE | FALSE |
| ILMN_2162253 | NMU       | FALSE | FALSE |
| ILMN_2325347 | B3GALNT1  | FALSE | FALSE |
| ILMN_1708416 | ARL6IP1   | FALSE | FALSE |
| ILMN_1757995 | PARP2     | FALSE | FALSE |
| ILMN_2369682 | HNRNPA2B1 | TRUE  | FALSE |
| ILMN_2230683 | CDCA7L    | FALSE | FALSE |
| ILMN_1787248 | SIVA1     | FALSE | FALSE |
| ILMN_1761939 | TIPIN     | FALSE | FALSE |
| ILMN_1708105 | EZH2      | FALSE | FALSE |
| ILMN_1736015 | JADE1     | FALSE | FALSE |
| ILMN_2169490 | TDRD9     | FALSE | FALSE |
| ILMN_1759184 | C19orf48  | FALSE | TRUE  |
| ILMN_1798164 | PHF3      | FALSE | TRUE  |
| ILMN_2316540 | MRPL11    | TRUE  | FALSE |
| ILMN_1678962 | DFFB      | FALSE | FALSE |
| ILMN_2266948 | SLC38A1   | FALSE | FALSE |
| ILMN_2298936 | NA        | TRUE  | FALSE |

|              |          |       |       |
|--------------|----------|-------|-------|
| ILMN_1753393 | OSGEP    | FALSE | FALSE |
| ILMN_2096654 | COMMD4   | FALSE | FALSE |
| ILMN_1811110 | TDRD9    | FALSE | FALSE |
| ILMN_1659285 | PSMG1    | FALSE | FALSE |
| ILMN_2376108 | PSMB9    | FALSE | FALSE |
| ILMN_1751773 | POLD3    | TRUE  | FALSE |
| ILMN_1771734 | GMPS     | FALSE | FALSE |
| ILMN_2116714 | SLC39A1  | FALSE | FALSE |
| ILMN_1706645 | MB21D1   | FALSE | FALSE |
| ILMN_1734827 | MKI67    | FALSE | TRUE  |
| ILMN_1654690 | CECR5    | TRUE  | FALSE |
| ILMN_3214052 | CACYBP   | FALSE | FALSE |
| ILMN_1783676 | CCDC15   | FALSE | FALSE |
| ILMN_1703692 | TUBB     | FALSE | FALSE |
| ILMN_1667966 | FAM129A  | TRUE  | FALSE |
| ILMN_1798533 | ZNF22    | FALSE | FALSE |
| ILMN_1664863 | CTRL     | FALSE | FALSE |
| ILMN_2120273 | AP1S2    | FALSE | FALSE |
| ILMN_1787628 | NOP56    | FALSE | FALSE |
| ILMN_3192791 | HNRNPM   | FALSE | FALSE |
| ILMN_3208233 | NA       | FALSE | FALSE |
| ILMN_1747160 | SYT15    | FALSE | FALSE |
| ILMN_1782745 | RBL1     | FALSE | FALSE |
| ILMN_2275533 | DIAPH3   | FALSE | FALSE |
| ILMN_1652237 | CBR3     | FALSE | FALSE |
| ILMN_1674706 | MTHFD2   | TRUE  | FALSE |
| ILMN_1743397 | PIGW     | FALSE | FALSE |
| ILMN_2405521 | MTHFD2   | TRUE  | FALSE |
| ILMN_1798886 | NUDT21   | FALSE | FALSE |
| ILMN_1728225 | KIAA1524 | FALSE | FALSE |
| ILMN_1678966 | SNRPF    | FALSE | TRUE  |
| ILMN_1805395 | LTBP3    | FALSE | FALSE |
| ILMN_2044832 | NOP56    | FALSE | FALSE |
| ILMN_3197767 | NA       | FALSE | FALSE |
| ILMN_2354237 | PARP2    | FALSE | FALSE |
| ILMN_1790136 | MRGBP    | FALSE | TRUE  |
| ILMN_1748894 | GTPBP3   | FALSE | TRUE  |
| ILMN_2226415 | MZT1     | FALSE | FALSE |
| ILMN_1757278 | HSPD1    | FALSE | FALSE |
| ILMN_2363621 | RBBP8    | FALSE | FALSE |
| ILMN_1651886 | CWF19L1  | FALSE | TRUE  |
| ILMN_1755677 | EMC9     | FALSE | FALSE |
| ILMN_2115633 | CD320    | FALSE | FALSE |
| ILMN_1716382 | C12orf75 | FALSE | FALSE |
| ILMN_1711799 | C9orf40  | FALSE | FALSE |
| ILMN_3242405 | RMRP     | FALSE | FALSE |

|              |          |       |       |
|--------------|----------|-------|-------|
| ILMN_3256004 | SNRPG    | FALSE | FALSE |
| ILMN_2392546 | PAICS    | TRUE  | FALSE |
| ILMN_1805985 | ANKRD32  | FALSE | FALSE |
| ILMN_1807501 | GIN54    | FALSE | FALSE |
| ILMN_3249261 | RPA1     | FALSE | FALSE |
| ILMN_2184640 | NOLC1    | TRUE  | FALSE |
| ILMN_1745623 | CRACR2B  | FALSE | FALSE |
| ILMN_1893697 | NA       | FALSE | FALSE |
| ILMN_2229242 | LSM3     | FALSE | FALSE |
| ILMN_1758778 | CNTRL    | FALSE | FALSE |
| ILMN_2061768 | HES7     | TRUE  | FALSE |
| ILMN_1770044 | CHRNA5   | FALSE | FALSE |
| ILMN_1678678 | SLC37A4  | TRUE  | FALSE |
| ILMN_3242459 | DCTPP1   | FALSE | FALSE |
| ILMN_2097546 | NUDC     | FALSE | FALSE |
| ILMN_1743205 | ABCA7    | FALSE | FALSE |
| ILMN_1758104 | PRPS2    | FALSE | FALSE |
| ILMN_1692511 | TMEM106C | FALSE | FALSE |
| ILMN_3243268 | ALG10    | FALSE | FALSE |
| ILMN_1766000 | PM20D2   | TRUE  | FALSE |
| ILMN_1797813 | SUZ12    | FALSE | FALSE |
| ILMN_1812489 | CEP85    | FALSE | FALSE |
| ILMN_3282503 | CBX3     | FALSE | FALSE |
| ILMN_1757387 | UCHL1    | FALSE | FALSE |
| ILMN_3247064 | SNRNP40  | FALSE | FALSE |
| ILMN_1719032 | LSM3     | FALSE | FALSE |
| ILMN_2365528 | HAUS8    | FALSE | FALSE |
| ILMN_1792712 | C4orf46  | FALSE | FALSE |
| ILMN_3197652 | ERI2     | FALSE | FALSE |
| ILMN_1744240 | TBC1D31  | FALSE | FALSE |
| ILMN_1715908 | NCAPH2   | FALSE | FALSE |
| ILMN_2110252 | NPM3     | FALSE | FALSE |
| ILMN_2344002 | GEMIN2   | FALSE | FALSE |
| ILMN_1800390 | ZNF511   | FALSE | FALSE |
| ILMN_1682799 | STAMBPL1 | FALSE | FALSE |
| ILMN_1754045 | FANCL    | FALSE | FALSE |
| ILMN_1657204 | SAE1     | FALSE | TRUE  |
| ILMN_1652333 | FN3KRP   | FALSE | FALSE |
| ILMN_1738530 | ATAD3A   | FALSE | FALSE |
| ILMN_1717707 | PSTK     | FALSE | FALSE |
| ILMN_1810922 | PCNT     | FALSE | FALSE |
| ILMN_1795719 | RPA1     | FALSE | FALSE |
| ILMN_2344007 | GEMIN2   | FALSE | FALSE |
| ILMN_1728512 | YWHAH    | FALSE | FALSE |
| ILMN_1801664 | POLR3K   | FALSE | FALSE |
| ILMN_2310296 | C21orf58 | FALSE | FALSE |

|              |           |       |       |
|--------------|-----------|-------|-------|
| ILMN_2347234 | PRMT1     | FALSE | FALSE |
| ILMN_1686458 | CEP152    | FALSE | FALSE |
| ILMN_2221006 | RAD21     | FALSE | FALSE |
| ILMN_1784946 | ORC3      | FALSE | FALSE |
| ILMN_1770678 | CBX2      | FALSE | FALSE |
| ILMN_1672094 | DLX1      | TRUE  | TRUE  |
| ILMN_2117987 | TFDP1     | FALSE | FALSE |
| ILMN_1654920 | HNRNPH3   | FALSE | FALSE |
| ILMN_1700378 | ZWILCH    | TRUE  | FALSE |
| ILMN_1804953 | CCDC18    | FALSE | FALSE |
| ILMN_1783333 | CMC2      | FALSE | FALSE |
| ILMN_3289172 | KDM4A-AS1 | FALSE | FALSE |
| ILMN_1797318 | HSPA14    | TRUE  | FALSE |
| ILMN_1736940 | HPRT1     | FALSE | FALSE |
| ILMN_1653711 | FZD2      | FALSE | FALSE |
| ILMN_1655733 | RFC2      | FALSE | FALSE |
| ILMN_1694233 | ACYP1     | FALSE | FALSE |
| ILMN_1710937 | IFI16     | FALSE | FALSE |
| ILMN_1694126 | KIF24     | FALSE | FALSE |
| ILMN_1797181 | LOC93622  | FALSE | FALSE |
| ILMN_1694780 | GCHFR     | FALSE | FALSE |
| ILMN_1760802 | MRE11A    | TRUE  | FALSE |
| ILMN_1744830 | ARHGAP11A | FALSE | FALSE |
| ILMN_2357361 | THYN1     | FALSE | FALSE |
| ILMN_1736096 | DLL3      | FALSE | FALSE |
| ILMN_1782813 | DHFR      | FALSE | FALSE |
| ILMN_1776080 | GTPBP6    | FALSE | FALSE |
| ILMN_1749410 | PKP4      | FALSE | FALSE |
| ILMN_1760849 | NETO2     | FALSE | FALSE |
| ILMN_1686968 | ZNF362    | FALSE | FALSE |
| ILMN_1652989 | NUP160    | FALSE | FALSE |
| ILMN_2255133 | BCL11A    | FALSE | TRUE  |
| ILMN_1705407 | NOP56     | FALSE | FALSE |
| ILMN_1664028 | CENPB     | FALSE | TRUE  |
| ILMN_1757497 | VGFB      | FALSE | FALSE |
| ILMN_1670218 | EXOSC6    | FALSE | FALSE |
| ILMN_1651262 | HNRNPAB   | FALSE | FALSE |
| ILMN_2053281 | L3HYPDH   | FALSE | FALSE |
| ILMN_1739946 | VKORC1    | FALSE | FALSE |
| ILMN_1714438 | MUTYH     | FALSE | FALSE |
| ILMN_1743367 | FZD4      | FALSE | FALSE |
| ILMN_1761981 | FAM96A    | FALSE | FALSE |
| ILMN_3283742 | ANP32B    | FALSE | FALSE |
| ILMN_3290340 | CHEK2P2   | FALSE | FALSE |
| ILMN_1716480 | ACD       | FALSE | FALSE |
| ILMN_1673962 | NUP205    | FALSE | FALSE |

|              |           |       |       |
|--------------|-----------|-------|-------|
| ILMN_1799103 | SNRPB     | FALSE | FALSE |
| ILMN_1693905 | HAT1      | FALSE | FALSE |
| ILMN_1671260 | WLS       | FALSE | FALSE |
| ILMN_1715905 | DSN1      | FALSE | FALSE |
| ILMN_1734205 | RASSF1    | FALSE | FALSE |
| ILMN_2188374 | XPOT      | FALSE | FALSE |
| ILMN_1803476 | KCTD20    | FALSE | FALSE |
| ILMN_1815154 | MYH10     | FALSE | FALSE |
| ILMN_2345908 | DDX11     | FALSE | FALSE |
| ILMN_3236244 | C1orf174  | FALSE | FALSE |
| ILMN_3224758 | TUBB      | FALSE | FALSE |
| ILMN_1734096 | DCLRE1A   | FALSE | FALSE |
| ILMN_1760280 | NXT1      | FALSE | FALSE |
| ILMN_1757384 | NA        | FALSE | FALSE |
| ILMN_2391750 | SFMBT1    | FALSE | FALSE |
| ILMN_1800261 | TUBA1B    | FALSE | FALSE |
| ILMN_2055700 | SLBP      | FALSE | FALSE |
| ILMN_1716336 | CKAP5     | FALSE | FALSE |
| ILMN_1691097 | HSP90AA1  | FALSE | FALSE |
| ILMN_3258321 | SNRPG     | FALSE | FALSE |
| ILMN_1803192 | WDR76     | FALSE | FALSE |
| ILMN_1653001 | CABLES1   | FALSE | FALSE |
| ILMN_1759419 | ILVBL     | TRUE  | FALSE |
| ILMN_1713875 | NA        | TRUE  | FALSE |
| ILMN_3272768 | LINC00339 | TRUE  | TRUE  |
| ILMN_1725244 | HAT1      | FALSE | FALSE |
| ILMN_3220861 | HMGB3     | FALSE | FALSE |
| ILMN_1770244 | CBX1      | FALSE | FALSE |
| ILMN_1673207 | KLF11     | FALSE | FALSE |
| ILMN_1746888 | PCOLCE2   | FALSE | FALSE |
| ILMN_2200880 | ZNF367    | FALSE | FALSE |
| ILMN_3305949 | NA        | FALSE | FALSE |
| ILMN_1695034 | NA        | FALSE | FALSE |
| ILMN_1690307 | TPRKB     | FALSE | FALSE |
| ILMN_1778991 | NFIB      | FALSE | FALSE |
| ILMN_2411781 | RYR1      | FALSE | FALSE |
| ILMN_2196569 | NUP93     | FALSE | FALSE |
| ILMN_2325168 | ARRB1     | FALSE | FALSE |
| ILMN_2413331 | TMEM107   | FALSE | FALSE |
| ILMN_2089458 | SASS6     | FALSE | FALSE |
| ILMN_1661695 | IRAK3     | FALSE | FALSE |
| ILMN_1748538 | ALDH1A2   | FALSE | FALSE |
| ILMN_3245659 | ERI1      | FALSE | FALSE |
| ILMN_1729973 | ZC3HAV1   | FALSE | FALSE |
| ILMN_1720266 | ZGRF1     | FALSE | FALSE |
| ILMN_1681221 | NA        | FALSE | FALSE |

|              |          |       |       |
|--------------|----------|-------|-------|
| ILMN_2227968 | NTHL1    | TRUE  | FALSE |
| ILMN_1664369 | DHTKD1   | TRUE  | FALSE |
| ILMN_2133187 | PRSS53   | FALSE | FALSE |
| ILMN_2391231 | SORD     | FALSE | FALSE |
| ILMN_2401352 | UHRF1    | FALSE | FALSE |
| ILMN_1768110 | ZAK      | FALSE | FALSE |
| ILMN_1693145 | BUB3     | FALSE | TRUE  |
| ILMN_1708059 | USP13    | TRUE  | FALSE |
| ILMN_1773760 | PAICS    | TRUE  | FALSE |
| ILMN_1762312 | FOXRED1  | FALSE | FALSE |
| ILMN_1784367 | HSPD1    | TRUE  | FALSE |
| ILMN_1666325 | ALG10B   | FALSE | FALSE |
| ILMN_1778152 | FIGNL1   | FALSE | FALSE |
| ILMN_1788099 | LSM4     | FALSE | FALSE |
| ILMN_2328280 | ACTL6A   | FALSE | FALSE |
| ILMN_1682008 | TCF19    | FALSE | FALSE |
| ILMN_2112460 | MAD2L1   | TRUE  | FALSE |
| ILMN_1805973 | GPR19    | FALSE | FALSE |
| ILMN_1731612 | UCHL5    | TRUE  | FALSE |
| ILMN_1797184 | PKN3     | FALSE | FALSE |
| ILMN_1754969 | LMCD1    | FALSE | FALSE |
| ILMN_1788689 | PHIP     | FALSE | FALSE |
| ILMN_1673543 | PGM2     | TRUE  | FALSE |
| ILMN_2367428 | FAM96A   | FALSE | FALSE |
| ILMN_2112402 | PHF5A    | FALSE | FALSE |
| ILMN_3240586 | PLD6     | FALSE | FALSE |
| ILMN_1673352 | IFITM2   | FALSE | FALSE |
| ILMN_1755758 | RIF1     | TRUE  | FALSE |
| ILMN_1797693 | BRI3BP   | FALSE | FALSE |
| ILMN_1748578 | RAD21    | FALSE | FALSE |
| ILMN_2323491 | NUP62    | FALSE | TRUE  |
| ILMN_1670809 | NRM      | FALSE | FALSE |
| ILMN_2348975 | NASP     | FALSE | FALSE |
| ILMN_1741632 | RAB3IL1  | FALSE | FALSE |
| ILMN_1791483 | PDE4D    | FALSE | FALSE |
| ILMN_1799015 | PXMP2    | FALSE | FALSE |
| ILMN_1759883 | SRP9     | FALSE | FALSE |
| ILMN_1766125 | LONP1    | FALSE | FALSE |
| ILMN_1713143 | MRPL3    | FALSE | FALSE |
| ILMN_3244117 | STMN3    | FALSE | FALSE |
| ILMN_1730622 | EVL      | FALSE | FALSE |
| ILMN_1716368 | PRIMPOL  | FALSE | FALSE |
| ILMN_2210482 | MRPS34   | FALSE | FALSE |
| ILMN_2173891 | C19orf40 | FALSE | FALSE |
| ILMN_1706958 | PCNA     | FALSE | FALSE |
| ILMN_1801118 | SNRNP25  | TRUE  | FALSE |



|              |          |       |       |
|--------------|----------|-------|-------|
| ILMN_1683562 | SNRPG    | FALSE | FALSE |
| ILMN_1682567 | CCDC106  | FALSE | FALSE |
| ILMN_1790781 | DHRS13   | FALSE | FALSE |
| ILMN_1720270 | CDR2     | FALSE | FALSE |
| ILMN_1719627 | SLC27A3  | FALSE | FALSE |
| ILMN_1665428 | GSDMD    | FALSE | FALSE |
| ILMN_2191568 | NPRL2    | FALSE | TRUE  |
| ILMN_2415583 | HS6ST2   | FALSE | FALSE |
| ILMN_1763129 | DCTPP1   | FALSE | FALSE |
| ILMN_1708147 | TBPL1    | FALSE | FALSE |
| ILMN_1808566 | TMEM180  | FALSE | FALSE |
| ILMN_1805996 | SIN3A    | FALSE | FALSE |
| ILMN_2061405 | NUP54    | TRUE  | FALSE |
| ILMN_1808999 | ARHGEF19 | FALSE | FALSE |
| ILMN_1717229 | AAED1    | FALSE | FALSE |
| ILMN_1673936 | KHSRP    | FALSE | FALSE |
| ILMN_2233099 | SSRP1    | FALSE | FALSE |
| ILMN_2411559 | PUS1     | TRUE  | FALSE |
| ILMN_2388547 | EPST11   | FALSE | FALSE |
| ILMN_2283325 | WLS      | FALSE | FALSE |
| ILMN_2219466 | APOBEC3B | TRUE  | FALSE |
| ILMN_1663383 | GEMIN5   | TRUE  | FALSE |
| ILMN_1766411 | AP1S2    | FALSE | FALSE |
| ILMN_1672128 | ATF4     | FALSE | FALSE |
| ILMN_1683475 | TOMM40   | FALSE | TRUE  |
| ILMN_3219806 | UNC93B1  | FALSE | FALSE |
| ILMN_1808861 | METTL15  | FALSE | FALSE |
| ILMN_2073604 | EBP      | FALSE | FALSE |
| ILMN_2257432 | RAD51    | FALSE | FALSE |
| ILMN_1703324 | PDSS1    | TRUE  | FALSE |
| ILMN_1800993 | CLUAP1   | FALSE | FALSE |
| ILMN_1705753 | CMSS1    | FALSE | FALSE |
| ILMN_1712122 | FANCD2   | TRUE  | FALSE |
| ILMN_3211857 | HMGN2    | FALSE | FALSE |
| ILMN_2044085 | RQCD1    | FALSE | FALSE |
| ILMN_1689652 | RNMTL1   | FALSE | FALSE |
| ILMN_1660806 | CSRP2    | FALSE | FALSE |
| ILMN_1762262 | PKIA     | FALSE | FALSE |
| ILMN_1793220 | GART     | FALSE | FALSE |
| ILMN_1809866 | WDR74    | TRUE  | FALSE |
| ILMN_2080611 | PDSS1    | TRUE  | FALSE |
| ILMN_1733690 | AKAP7    | TRUE  | FALSE |
| ILMN_1799814 | SNRNP40  | FALSE | FALSE |
| ILMN_1693340 | RAC3     | FALSE | FALSE |
| ILMN_1661432 | NUP43    | FALSE | FALSE |
| ILMN_1782504 | MTERF3   | FALSE | FALSE |

|              |         |       |       |
|--------------|---------|-------|-------|
| ILMN_1680831 | BAZ1B   | FALSE | FALSE |
| ILMN_1657347 | PODXL2  | FALSE | FALSE |
| ILMN_1702783 | SNRPA1  | FALSE | FALSE |
| ILMN_1739210 | NSL1    | FALSE | FALSE |
| ILMN_1691949 | NA      | FALSE | FALSE |
| ILMN_2166865 | ENY2    | FALSE | FALSE |
| ILMN_1789338 | SORBS3  | FALSE | FALSE |
| ILMN_1726306 | HMBS    | FALSE | FALSE |
| ILMN_1771019 | MTMR4   | FALSE | FALSE |
| ILMN_1667825 | MLKL    | FALSE | FALSE |
| ILMN_1804834 | OARD1   | FALSE | FALSE |
| ILMN_1748697 | LIN28B  | FALSE | FALSE |
| ILMN_3211935 | SRSF3   | FALSE | FALSE |
| ILMN_1743711 | XPOT    | TRUE  | FALSE |
| ILMN_3256868 | RBMX    | FALSE | FALSE |
| ILMN_1751743 | XRCC1   | FALSE | TRUE  |
| ILMN_3236021 | NA      | FALSE | FALSE |
| ILMN_1681437 | DCXR    | FALSE | FALSE |
| ILMN_1795454 | CPSF6   | FALSE | FALSE |
| ILMN_1782045 | FKBP4   | FALSE | FALSE |
| ILMN_3246353 | SNORD65 | TRUE  | FALSE |
| ILMN_1723212 | SRSF3   | FALSE | FALSE |
| ILMN_3241046 | MYBL1   | FALSE | FALSE |
| ILMN_2355042 | CLUAP1  | FALSE | FALSE |
| ILMN_1680246 | MAT2B   | FALSE | FALSE |
| ILMN_1683023 | PDGFC   | FALSE | FALSE |
| ILMN_2049642 | RPA1    | TRUE  | TRUE  |
| ILMN_2070300 | LSM2    | FALSE | FALSE |
| ILMN_1782305 | NR4A2   | FALSE | TRUE  |
| ILMN_1810181 | PCGF6   | FALSE | FALSE |
| ILMN_2110167 | POLR1E  | FALSE | FALSE |
| ILMN_1751744 | ANKLE1  | FALSE | FALSE |
| ILMN_1661886 | APEX1   | FALSE | FALSE |
| ILMN_1770732 | COPS3   | TRUE  | FALSE |
| ILMN_2232157 | SLMO1   | FALSE | FALSE |
| ILMN_3251482 | ALG10B  | FALSE | FALSE |
| ILMN_1771835 | NUP54   | FALSE | FALSE |
| ILMN_2364529 | EZH2    | FALSE | FALSE |
| ILMN_3270641 | HNRNPH3 | FALSE | FALSE |
| ILMN_1692473 | PRMT1   | FALSE | FALSE |
| ILMN_1673450 | DDN     | FALSE | FALSE |
| ILMN_1761083 | HNRNPA3 | FALSE | FALSE |
| ILMN_1693669 | WRAP53  | FALSE | FALSE |
| ILMN_1747870 | CD3EAP  | FALSE | FALSE |
| ILMN_1693985 | JPH1    | FALSE | FALSE |
| ILMN_1778836 | SRSF7   | FALSE | FALSE |

|              |          |       |       |
|--------------|----------|-------|-------|
| ILMN_1674302 | PPAT     | TRUE  | FALSE |
| ILMN_1788135 | NA       | FALSE | FALSE |
| ILMN_1697363 | C20orf27 | FALSE | TRUE  |
| ILMN_1679640 | FXR1     | FALSE | FALSE |
| ILMN_1739576 | CYB5R2   | FALSE | FALSE |
| ILMN_2134555 | KCTD3    | FALSE | FALSE |
| ILMN_2184966 | ZHX2     | FALSE | FALSE |
| ILMN_1798827 | SRBD1    | FALSE | FALSE |
| ILMN_1705570 | H2AFY2   | FALSE | FALSE |
| ILMN_1788363 | MLH1     | FALSE | FALSE |
| ILMN_1703926 | PTGER2   | FALSE | FALSE |
| ILMN_1882000 | TXLNG    | TRUE  | FALSE |
| ILMN_1770206 | GEMIN4   | TRUE  | FALSE |
| ILMN_1658373 | PAN2     | FALSE | FALSE |
| ILMN_1722811 | CDKN1B   | FALSE | TRUE  |
| ILMN_2077758 | CTDSPL2  | FALSE | FALSE |
| ILMN_1669878 | GUSB     | FALSE | FALSE |
| ILMN_2155172 | BRX1     | TRUE  | FALSE |
| ILMN_2213199 | CEP44    | FALSE | FALSE |
| ILMN_3239426 | GPN3     | FALSE | FALSE |
| ILMN_3201453 | PRKRIR   | TRUE  | FALSE |
| ILMN_1693410 | NA       | FALSE | FALSE |
| ILMN_1730888 | ZNF680   | FALSE | FALSE |
| ILMN_1765641 | SEMA3A   | FALSE | FALSE |
| ILMN_2179837 | BANF1    | TRUE  | FALSE |
| ILMN_1666894 | CSPG4    | FALSE | FALSE |
| ILMN_3246409 | HNRNPH1  | FALSE | FALSE |
| ILMN_1778764 | BUB3     | FALSE | FALSE |
| ILMN_1652486 | THAP7    | FALSE | FALSE |
| ILMN_1654545 | CPSF1    | FALSE | FALSE |
| ILMN_2415926 | THOC3    | FALSE | FALSE |
| ILMN_2401701 | PCGF6    | FALSE | FALSE |
| ILMN_2096191 | AASDHPPT | FALSE | FALSE |
| ILMN_3298829 | HMG2     | FALSE | FALSE |
| ILMN_1751086 | ATL3     | TRUE  | FALSE |
| ILMN_1685703 | ACOX2    | FALSE | FALSE |
| ILMN_2337974 | PKIA     | FALSE | FALSE |
| ILMN_1789171 | EEF2K    | FALSE | FALSE |
| ILMN_3176746 | TMPO-AS1 | FALSE | FALSE |
| ILMN_1689720 | PPP2R3B  | TRUE  | TRUE  |
| ILMN_1658416 | MRPS18C  | FALSE | FALSE |
| ILMN_1735719 | UNG      | FALSE | FALSE |
| ILMN_1730612 | NA       | FALSE | FALSE |
| ILMN_1659462 | DUSP23   | FALSE | FALSE |
| ILMN_1746206 | CEP131   | FALSE | FALSE |
| ILMN_2318568 | HCFC1R1  | FALSE | FALSE |

|              |           |       |       |
|--------------|-----------|-------|-------|
| ILMN_1750102 | EME1      | FALSE | FALSE |
| ILMN_1736575 | TRIM28    | FALSE | TRUE  |
| ILMN_1724907 | NA        | TRUE  | FALSE |
| ILMN_1695959 | EVA1C     | FALSE | FALSE |
| ILMN_1893633 | PRKCQ-AS1 | TRUE  | FALSE |
| ILMN_1655694 | NA        | FALSE | FALSE |
| ILMN_1745172 | ILF2      | FALSE | FALSE |
| ILMN_2105983 | XRCC5     | FALSE | FALSE |
| ILMN_2335718 | HNRNPAB   | FALSE | FALSE |
| ILMN_3233091 | UTY       | FALSE | FALSE |
| ILMN_1696311 | IMPAD1    | FALSE | FALSE |
| ILMN_1813834 | PRMT6     | FALSE | FALSE |
| ILMN_1661717 | TFDP1     | FALSE | FALSE |
| ILMN_2045729 | WDR12     | TRUE  | FALSE |
| ILMN_1752075 | MYBPC1    | FALSE | FALSE |
| ILMN_2182531 | TIMM21    | TRUE  | FALSE |
| ILMN_2139351 | ZNF232    | FALSE | FALSE |
| ILMN_2070349 | POLR3G    | TRUE  | FALSE |
| ILMN_1770053 | RBBP7     | TRUE  | FALSE |
| ILMN_2389114 | FIGNL1    | FALSE | FALSE |
| ILMN_3199647 | CBX1      | FALSE | FALSE |
| ILMN_2205935 | SFXN1     | FALSE | FALSE |
| ILMN_2217935 | RFC1      | TRUE  | FALSE |
| ILMN_1724837 | ZC3HAV1   | FALSE | FALSE |
| ILMN_1711894 | MYB       | FALSE | FALSE |
| ILMN_1733390 | LARP1B    | FALSE | FALSE |
| ILMN_1806603 | MESP1     | FALSE | FALSE |
| ILMN_1730260 | N6AMT2    | FALSE | FALSE |
| ILMN_3260070 | RAN       | FALSE | FALSE |
| ILMN_1768662 | UCK2      | TRUE  | FALSE |
| ILMN_1667510 | C12orf65  | FALSE | FALSE |
| ILMN_1753498 | COASY     | FALSE | FALSE |
| ILMN_3233388 | RELL1     | TRUE  | TRUE  |
| ILMN_1766713 | HSPD1     | FALSE | FALSE |
| ILMN_1693766 | CEP135    | FALSE | FALSE |
| ILMN_1769369 | ELAVL2    | FALSE | FALSE |
| ILMN_2047676 | OSGEPL1   | FALSE | TRUE  |
| ILMN_1761961 | MCUR1     | FALSE | FALSE |
| ILMN_1807304 | MBNL1     | FALSE | FALSE |
| ILMN_1705594 | NAT10     | FALSE | FALSE |
| ILMN_1665655 | CTDSPL2   | FALSE | FALSE |
| ILMN_2354211 | RCC1      | FALSE | FALSE |
| ILMN_1669881 | TSPAN13   | FALSE | FALSE |
| ILMN_1676458 | MRPL11    | FALSE | FALSE |
| ILMN_1684346 | TNFAIP8L1 | FALSE | FALSE |
| ILMN_2319344 | APEX1     | FALSE | FALSE |

|              |           |       |       |
|--------------|-----------|-------|-------|
| ILMN_3187530 | CENPI     | FALSE | FALSE |
| ILMN_2077886 | C1orf109  | FALSE | FALSE |
| ILMN_1739101 | RBBP8     | FALSE | FALSE |
| ILMN_3249366 | JMJD8     | FALSE | FALSE |
| ILMN_1702140 | RACGAP1   | FALSE | FALSE |
| ILMN_2149400 | SPC25     | FALSE | FALSE |
| ILMN_3286312 | NEK2      | FALSE | FALSE |
| ILMN_1676905 | TIGD7     | FALSE | FALSE |
| ILMN_1759983 | DR1       | FALSE | FALSE |
| ILMN_1677239 | CCDC14    | FALSE | FALSE |
| ILMN_1792078 | RNF114    | TRUE  | TRUE  |
| ILMN_1764729 | JAG2      | TRUE  | FALSE |
| ILMN_1679800 | BRX1      | FALSE | FALSE |
| ILMN_1698677 | C4orf27   | FALSE | FALSE |
| ILMN_1720996 | SLC12A2   | FALSE | FALSE |
| ILMN_1673073 | WDR62     | FALSE | FALSE |
| ILMN_1656628 | WDR4      | FALSE | FALSE |
| ILMN_2375032 | BEND3     | FALSE | FALSE |
| ILMN_1901198 | LINC00339 | FALSE | FALSE |
| ILMN_1774890 | LAS1L     | TRUE  | FALSE |
| ILMN_1708954 | GAR1      | FALSE | FALSE |
| ILMN_1661599 | DDIT4     | TRUE  | FALSE |
| ILMN_1782439 | CNN3      | TRUE  | FALSE |
| ILMN_1675695 | PDS5B     | FALSE | FALSE |
| ILMN_1792748 | CPS1      | TRUE  | TRUE  |
| ILMN_2399769 | WLS       | FALSE | FALSE |
| ILMN_1660549 | WLS       | FALSE | FALSE |
| ILMN_1790603 | ATPAF1    | FALSE | FALSE |
| ILMN_1807044 | UBAC1     | FALSE | FALSE |
| ILMN_1736005 | NCAPH2    | FALSE | FALSE |
| ILMN_2372200 | ZNF586    | FALSE | FALSE |
| ILMN_1683664 | FAM60A    | FALSE | FALSE |
| ILMN_2100458 | RFESD     | TRUE  | FALSE |
| ILMN_1661439 | FLOT1     | FALSE | FALSE |
| ILMN_3308663 | MIR1228   | FALSE | FALSE |
| ILMN_1687921 | JMJD8     | FALSE | FALSE |
| ILMN_2373515 | HSP90AA1  | FALSE | FALSE |
| ILMN_1758339 | CSTF1     | FALSE | TRUE  |
| ILMN_3310113 | MIR586    | FALSE | FALSE |
| ILMN_1748926 | TMEM209   | FALSE | FALSE |
| ILMN_2411076 | MATR3     | FALSE | FALSE |
| ILMN_1815190 | METT1     | TRUE  | FALSE |
| ILMN_2392352 | CTPS2     | FALSE | FALSE |
| ILMN_1671004 | POLG2     | FALSE | FALSE |
| ILMN_1669940 | TMEM38B   | FALSE | FALSE |
| ILMN_1711514 | COCH      | FALSE | FALSE |

|              |         |       |       |
|--------------|---------|-------|-------|
| ILMN_1678934 | POLR1E  | FALSE | FALSE |
| ILMN_2145997 | SP4     | FALSE | FALSE |
| ILMN_1652163 | DVL2    | FALSE | FALSE |
| ILMN_1700604 | RBM14   | FALSE | FALSE |
| ILMN_1743373 | DLL1    | FALSE | FALSE |
| ILMN_2044617 | MTERF3  | FALSE | FALSE |
| ILMN_1730809 | SLC29A2 | FALSE | FALSE |
| ILMN_1792435 | STAG1   | FALSE | FALSE |
| ILMN_1739429 | HS6ST2  | FALSE | FALSE |
| ILMN_3283680 | HSPD1   | FALSE | FALSE |
| ILMN_1730077 | RPUSD2  | FALSE | TRUE  |
| ILMN_2324056 | GNL3    | TRUE  | TRUE  |
| ILMN_1676026 | MRPS26  | FALSE | TRUE  |
| ILMN_1812777 | MRPL35  | FALSE | FALSE |
| ILMN_3243986 | FAM72B  | FALSE | FALSE |
| ILMN_1684746 | IPO11   | FALSE | FALSE |
| ILMN_1669905 | DCP2    | FALSE | FALSE |
| ILMN_1681634 | PXMP2   | FALSE | FALSE |
| ILMN_2215545 | CMSS1   | FALSE | FALSE |
| ILMN_1765990 | KCNK2   | FALSE | FALSE |
| ILMN_2149053 | RIF1    | TRUE  | FALSE |
| ILMN_1715540 | TRAIP   | FALSE | FALSE |
| ILMN_1795336 | PTER    | TRUE  | FALSE |
| ILMN_2172202 | NUDT15  | FALSE | FALSE |
| ILMN_2223380 | PPWD1   | FALSE | FALSE |
| ILMN_1790625 | CBX3    | TRUE  | FALSE |
| ILMN_3177285 | HNRNPR  | FALSE | FALSE |
| ILMN_1783075 | MMS22L  | FALSE | FALSE |
| ILMN_1789775 | WDR74   | TRUE  | FALSE |
| ILMN_3249240 | C4orf46 | FALSE | FALSE |
| ILMN_1675007 | ZSCAN5A | FALSE | TRUE  |
| ILMN_3236713 | SNHG1   | FALSE | FALSE |
| ILMN_1800220 | KCTD3   | FALSE | FALSE |
| ILMN_1685954 | HMBS    | FALSE | FALSE |
| ILMN_1754220 | SF3A2   | FALSE | FALSE |
| ILMN_1809477 | CARHSP1 | FALSE | FALSE |
| ILMN_1747943 | NA      | FALSE | FALSE |
| ILMN_1724497 | ABI2    | FALSE | FALSE |
| ILMN_1689800 | MRTO4   | TRUE  | FALSE |
| ILMN_1684771 | PGRMC1  | TRUE  | FALSE |
| ILMN_1784880 | TAF9B   | FALSE | FALSE |
| ILMN_1712075 | SYNM    | FALSE | FALSE |
| ILMN_1689665 | NAE1    | FALSE | FALSE |
| ILMN_1803997 | SDCCAG3 | FALSE | FALSE |
| ILMN_1797055 | LIN52   | FALSE | FALSE |
| ILMN_1725642 | SUMO3   | FALSE | FALSE |

|              |          |       |       |
|--------------|----------|-------|-------|
| ILMN_1661264 | SHMT2    | FALSE | FALSE |
| ILMN_1707720 | SLC1A5   | FALSE | FALSE |
| ILMN_2101526 | GGCT     | FALSE | FALSE |
| ILMN_1716553 | KIF23    | FALSE | FALSE |
| ILMN_2319825 | ACYP1    | FALSE | FALSE |
| ILMN_1797372 | C3orf58  | FALSE | FALSE |
| ILMN_1666739 | RBM15    | FALSE | FALSE |
| ILMN_1792076 | TRERF1   | FALSE | FALSE |
| ILMN_1774661 | SNRPB    | FALSE | FALSE |
| ILMN_2334042 | THYN1    | FALSE | FALSE |
| ILMN_1684321 | CYB5B    | FALSE | FALSE |
| ILMN_1777318 | C9orf64  | FALSE | FALSE |
| ILMN_1763390 | ISL1     | FALSE | FALSE |
| ILMN_1740005 | SERPINF2 | TRUE  | FALSE |
| ILMN_1763326 | SIMC1    | FALSE | FALSE |
| ILMN_1727001 | DDX46    | FALSE | TRUE  |
| ILMN_2315964 | PSRC1    | FALSE | FALSE |
| ILMN_1701512 | KIAA0391 | FALSE | FALSE |
| ILMN_1787879 | ARL2     | TRUE  | FALSE |
| ILMN_1725121 | XPO1     | FALSE | FALSE |
| ILMN_1655622 | PRKRIR   | TRUE  | FALSE |
| ILMN_1734702 | MANEA    | FALSE | FALSE |
| ILMN_1772743 | PIGK     | TRUE  | FALSE |
| ILMN_1721081 | SP4      | FALSE | FALSE |
| ILMN_2225577 | POC5     | FALSE | FALSE |
| ILMN_1663113 | TTL12    | FALSE | FALSE |
| ILMN_2046003 | ZDHHC6   | FALSE | FALSE |
| ILMN_1741406 | HOOK1    | FALSE | FALSE |
| ILMN_1712556 | ZW10     | FALSE | FALSE |
| ILMN_1743208 | NEDD1    | FALSE | FALSE |
| ILMN_1781516 | SUPT16H  | FALSE | FALSE |
| ILMN_2146372 | KCTD6    | FALSE | FALSE |
| ILMN_2345015 | PTGES2   | FALSE | FALSE |
| ILMN_1766499 | HSPA2    | FALSE | FALSE |
| ILMN_2082324 | SLC36A4  | TRUE  | FALSE |
| ILMN_1805590 | LSM8     | FALSE | FALSE |
| ILMN_2358202 | SRRT     | FALSE | FALSE |
| ILMN_1701374 | NUP35    | TRUE  | FALSE |
| ILMN_1723211 | L2HGDH   | FALSE | FALSE |
| ILMN_2333319 | PTBP1    | FALSE | FALSE |
| ILMN_1695491 | WDYHV1   | FALSE | FALSE |
| ILMN_1655165 | RNF138   | FALSE | FALSE |
| ILMN_1732705 | HCFC1    | FALSE | TRUE  |
| ILMN_1658437 | SFXN4    | TRUE  | FALSE |
| ILMN_1718069 | MIS12    | FALSE | TRUE  |
| ILMN_2134765 | NA       | FALSE | FALSE |

|              |          |       |       |
|--------------|----------|-------|-------|
| ILMN_1682404 | SETMAR   | FALSE | FALSE |
| ILMN_1670801 | MTR      | FALSE | FALSE |
| ILMN_2228938 | ECM2     | FALSE | FALSE |
| ILMN_1741585 | SFMBT1   | FALSE | TRUE  |
| ILMN_1773964 | H1FX     | FALSE | FALSE |
| ILMN_1758827 | RTN4IP1  | TRUE  | FALSE |
| ILMN_1770911 | NRSN2    | FALSE | TRUE  |
| ILMN_2366972 | NUDT6    | FALSE | FALSE |
| ILMN_1761044 | GNB1L    | FALSE | FALSE |
| ILMN_1718718 | MKKS     | FALSE | FALSE |
| ILMN_1775192 | BCLAF1   | FALSE | FALSE |
| ILMN_1700685 | S100BPB  | FALSE | FALSE |
| ILMN_2175075 | SRSF4    | FALSE | FALSE |
| ILMN_1786379 | SYNGR3   | TRUE  | FALSE |
| ILMN_2364535 | SNUPN    | FALSE | FALSE |
| ILMN_3272603 | FAM60A   | FALSE | FALSE |
| ILMN_1782688 | THNSL1   | FALSE | FALSE |
| ILMN_1755354 | YBX2     | FALSE | FALSE |
| ILMN_2412549 | GAR1     | FALSE | FALSE |
| ILMN_1742145 | ESPL1    | FALSE | FALSE |
| ILMN_1806123 | MRPL23   | FALSE | FALSE |
| ILMN_1686626 | NA       | FALSE | FALSE |
| ILMN_2072091 | HNRNPUL2 | FALSE | FALSE |
| ILMN_1654583 | CHD1     | FALSE | FALSE |
| ILMN_1756657 | TRIM7    | FALSE | FALSE |
| ILMN_2373689 | DIAPH3   | FALSE | FALSE |
| ILMN_1694479 | WDR18    | FALSE | FALSE |
| ILMN_1796210 | PPRC1    | FALSE | FALSE |
| ILMN_1719158 | CTBP1    | FALSE | FALSE |
| ILMN_2253648 | PRKDC    | TRUE  | FALSE |
| ILMN_1670638 | PITPNC1  | FALSE | FALSE |
| ILMN_3306997 | METTL1   | TRUE  | FALSE |
| ILMN_1741957 | RABEPK   | FALSE | FALSE |
| ILMN_1667417 | RAB23    | FALSE | FALSE |
| ILMN_1684563 | SPIN4    | FALSE | FALSE |
| ILMN_1710207 | FAM178A  | FALSE | FALSE |
| ILMN_2275803 | LRRC45   | FALSE | FALSE |
| ILMN_2381138 | SEH1L    | FALSE | FALSE |
| ILMN_1729144 | EBAG9    | FALSE | FALSE |
| ILMN_1748476 | NOP58    | TRUE  | FALSE |
| ILMN_1711878 | ENOPH1   | FALSE | FALSE |
| ILMN_1765860 | DOCK11   | FALSE | TRUE  |
| ILMN_1746158 | HOXD11   | FALSE | FALSE |
| ILMN_3236680 | PPAT     | FALSE | FALSE |
| ILMN_2343563 | ANAPC11  | FALSE | FALSE |
| ILMN_2346997 | RAB23    | FALSE | FALSE |



|              |          |       |       |
|--------------|----------|-------|-------|
| ILMN_1787345 | FKBP11   | FALSE | FALSE |
| ILMN_1772957 | FOXRED2  | FALSE | FALSE |
| ILMN_1667239 | INPP1    | FALSE | FALSE |
| ILMN_3238269 | NDUFA6   | FALSE | TRUE  |
| ILMN_1803775 | NA       | FALSE | FALSE |
| ILMN_1734194 | EXOSC3   | FALSE | FALSE |
| ILMN_1740493 | TRAF5    | FALSE | FALSE |
| ILMN_1769158 | ISOC2    | FALSE | TRUE  |
| ILMN_3301824 | TSEN15   | FALSE | FALSE |
| ILMN_1694106 | GPD1L    | TRUE  | FALSE |
| ILMN_1669928 | ARHGEF16 | FALSE | FALSE |
| ILMN_2054362 | SLC25A40 | TRUE  | FALSE |
| ILMN_1766637 | GLA      | TRUE  | FALSE |
| ILMN_1677452 | REXO4    | FALSE | TRUE  |
| ILMN_3273047 | POLR3G   | TRUE  | FALSE |
| ILMN_1732509 | LRRC40   | FALSE | FALSE |
| ILMN_1704842 | ARL4A    | TRUE  | FALSE |
| ILMN_2180827 | MEPCE    | FALSE | FALSE |
| ILMN_3284119 | NA       | FALSE | FALSE |
| ILMN_1701753 | HNRNPK   | FALSE | FALSE |
| ILMN_1668498 | CWF19L2  | TRUE  | FALSE |
| ILMN_1696087 | PHB2     | FALSE | FALSE |
| ILMN_1898682 | PHIP     | FALSE | FALSE |
| ILMN_1691966 | NA       | FALSE | FALSE |
| ILMN_1682572 | C2CD5    | FALSE | FALSE |
| ILMN_1705141 | CACYBP   | FALSE | FALSE |
| ILMN_2381397 | HSPD1    | FALSE | FALSE |
| ILMN_1670379 | ANTXR1   | FALSE | FALSE |
| ILMN_1756443 | INHA     | FALSE | FALSE |
| ILMN_1691444 | UHRF2    | FALSE | FALSE |
| ILMN_1750203 | NA       | FALSE | FALSE |
| ILMN_1688971 | NOL11    | FALSE | FALSE |
| ILMN_2400292 | MAPK9    | FALSE | FALSE |
| ILMN_1665865 | IGFBP4   | FALSE | FALSE |
| ILMN_1807807 | SKA2     | FALSE | FALSE |
| ILMN_2178226 | NA       | TRUE  | FALSE |
| ILMN_1765044 | CUTC     | FALSE | FALSE |
| ILMN_1792305 | ZNF318   | FALSE | FALSE |
| ILMN_1656920 | CRIP1    | FALSE | FALSE |
| ILMN_2251375 | ZFP64    | FALSE | FALSE |
| ILMN_3289650 | NA       | FALSE | FALSE |
| ILMN_2335398 | CECR5    | FALSE | FALSE |
| ILMN_2119421 | NA       | FALSE | FALSE |
| ILMN_1770692 | WDR12    | TRUE  | FALSE |
| ILMN_1659463 | APAF1    | FALSE | FALSE |
| ILMN_1796013 | PYCR1    | TRUE  | FALSE |

|              |           |       |       |
|--------------|-----------|-------|-------|
| ILMN_2379734 | CTBP1     | FALSE | FALSE |
| ILMN_3194087 | LINC00339 | FALSE | TRUE  |
| ILMN_1730304 | NA        | FALSE | FALSE |
| ILMN_1783253 | NA        | FALSE | FALSE |
| ILMN_2356311 | SMIM11    | FALSE | FALSE |
| ILMN_1797499 | PRKDC     | TRUE  | FALSE |
| ILMN_1698996 | SLC19A1   | TRUE  | FALSE |
| ILMN_1769545 | PRPF19    | FALSE | FALSE |
| ILMN_1699987 | MANEA     | FALSE | TRUE  |
| ILMN_2323508 | AIF1L     | FALSE | FALSE |
| ILMN_1879857 | NA        | FALSE | FALSE |
| ILMN_1766435 | WBP11     | FALSE | FALSE |
| ILMN_1705151 | SF3A3     | FALSE | FALSE |
| ILMN_3279219 | SNRPG     | FALSE | FALSE |
| ILMN_2357272 | BCLAF1    | FALSE | FALSE |
| ILMN_1762426 | DHFRL1    | FALSE | FALSE |
| ILMN_3273854 | HNRNPA2B1 | FALSE | FALSE |
| ILMN_1740737 | DCPS      | FALSE | FALSE |
| ILMN_1769566 | ATG3      | FALSE | FALSE |
| ILMN_1786139 | VKORC1    | FALSE | FALSE |
| ILMN_1718734 | MLLT6     | FALSE | FALSE |
| ILMN_1672878 | ABR       | FALSE | FALSE |
| ILMN_1810235 | ATP6V1E2  | FALSE | FALSE |
| ILMN_1764321 | ACOT4     | FALSE | FALSE |
| ILMN_2327203 | POT1      | FALSE | FALSE |
| ILMN_1727553 | ZBED8     | FALSE | FALSE |
| ILMN_1725105 | EEF1E1    | FALSE | FALSE |
| ILMN_2224031 | CETN3     | FALSE | FALSE |
| ILMN_1712918 | NQO2      | FALSE | FALSE |
| ILMN_1809662 | MZT1      | FALSE | FALSE |
| ILMN_1695868 | TOMM6     | FALSE | FALSE |
| ILMN_1707088 | DENND2D   | FALSE | FALSE |
| ILMN_2413041 | TEAD4     | FALSE | FALSE |
| ILMN_1733932 | SNUPN     | FALSE | FALSE |
| ILMN_1708627 | SRP9      | FALSE | FALSE |
| ILMN_2189424 | MRPL20    | FALSE | FALSE |
| ILMN_1800855 | PPTC7     | FALSE | FALSE |
| ILMN_1707169 | AGMAT     | FALSE | FALSE |
| ILMN_1750167 | PRR3      | FALSE | FALSE |
| ILMN_1733164 | NA        | FALSE | FALSE |
| ILMN_1662318 | CCDC59    | FALSE | FALSE |
| ILMN_3243011 | SDHD      | FALSE | FALSE |
| ILMN_3262936 | LCLAT1    | TRUE  | FALSE |
| ILMN_1779399 | SNRPA     | FALSE | FALSE |
| ILMN_1791296 | DPY19L1   | FALSE | FALSE |
| ILMN_1805481 | TRMT11    | TRUE  | FALSE |

|              |            |       |       |
|--------------|------------|-------|-------|
| ILMN_3275936 | NA         | FALSE | FALSE |
| ILMN_1763264 | MRPL2      | FALSE | FALSE |
| ILMN_1713178 | DENND6A    | FALSE | FALSE |
| ILMN_1726030 | GPX7       | FALSE | FALSE |
| ILMN_1767475 | CERK       | FALSE | FALSE |
| ILMN_1745806 | PEMT       | FALSE | FALSE |
| ILMN_1762787 | RNF26      | FALSE | FALSE |
| ILMN_2352609 | OGG1       | FALSE | FALSE |
| ILMN_1656016 | DHX9       | FALSE | FALSE |
| ILMN_2372379 | MGA        | FALSE | FALSE |
| ILMN_1749253 | TUBD1      | FALSE | FALSE |
| ILMN_1708881 | RAB20      | FALSE | FALSE |
| ILMN_1711414 | MRPS27     | FALSE | FALSE |
| ILMN_2317618 | TCF19      | FALSE | FALSE |
| ILMN_1703279 | CXorf57    | FALSE | FALSE |
| ILMN_1784292 | ANKMY2     | FALSE | FALSE |
| ILMN_1797074 | EMG1       | FALSE | FALSE |
| ILMN_1653896 | ATRIP      | FALSE | TRUE  |
| ILMN_1728626 | WDR5       | FALSE | TRUE  |
| ILMN_1723235 | DUS3L      | FALSE | FALSE |
| ILMN_1799280 | BDH1       | FALSE | FALSE |
| ILMN_1669584 | ILF3       | FALSE | FALSE |
| ILMN_2234229 | PRMT6      | FALSE | FALSE |
| ILMN_1753286 | MYO19      | FALSE | FALSE |
| ILMN_1692517 | SORD       | FALSE | FALSE |
| ILMN_2393573 | RASSF1     | FALSE | FALSE |
| ILMN_1676528 | BTN3A2     | FALSE | FALSE |
| ILMN_1729417 | GNE        | FALSE | FALSE |
| ILMN_1775085 | ZNF232     | FALSE | FALSE |
| ILMN_1769451 | ILVBL      | TRUE  | FALSE |
| ILMN_1775573 | DPY19L4    | FALSE | FALSE |
| ILMN_2041327 | MRPL37     | FALSE | FALSE |
| ILMN_3235397 | SNORD110   | FALSE | FALSE |
| ILMN_1735367 | HSD17B11   | FALSE | FALSE |
| ILMN_1719646 | ZIK1       | FALSE | FALSE |
| ILMN_1726986 | AADAT      | FALSE | FALSE |
| ILMN_2413330 | TMEM107    | FALSE | FALSE |
| ILMN_3263702 | VPS9D1-AS1 | TRUE  | FALSE |
| ILMN_1726391 | MRPL39     | FALSE | FALSE |
| ILMN_1680091 | POP7       | FALSE | FALSE |
| ILMN_1786326 | KCTD15     | FALSE | FALSE |
| ILMN_1736234 | CHTOP      | TRUE  | TRUE  |
| ILMN_3289346 | NA         | FALSE | FALSE |
| ILMN_1698189 | AASDHPPT   | TRUE  | FALSE |
| ILMN_2076640 | KHDRBS1    | FALSE | FALSE |
| ILMN_3244893 | BAG2       | FALSE | FALSE |

|              |            |       |       |
|--------------|------------|-------|-------|
| ILMN_2121437 | NCL        | FALSE | FALSE |
| ILMN_1815107 | MATR3      | FALSE | FALSE |
| ILMN_1679995 | MPP6       | FALSE | FALSE |
| ILMN_1673773 | GALNT18    | FALSE | FALSE |
| ILMN_3264828 | METTL15    | FALSE | FALSE |
| ILMN_1714965 | NFKB1      | FALSE | FALSE |
| ILMN_2363361 | SFXN4      | FALSE | FALSE |
| ILMN_1741736 | DDX28      | TRUE  | TRUE  |
| ILMN_1772302 | NA         | FALSE | FALSE |
| ILMN_2092850 | HPSE       | FALSE | FALSE |
| ILMN_2144401 | GLB1L2     | FALSE | FALSE |
| ILMN_1667551 | NA         | FALSE | FALSE |
| ILMN_2086238 | SMYD4      | FALSE | FALSE |
| ILMN_1718830 | ICE2       | FALSE | FALSE |
| ILMN_1767892 | DUSP12     | FALSE | FALSE |
| ILMN_3240022 | SNORA73A   | FALSE | FALSE |
| ILMN_1723874 | MRPS6      | FALSE | FALSE |
| ILMN_1774028 | MTFR1      | FALSE | FALSE |
| ILMN_1663002 | STOML2     | FALSE | FALSE |
| ILMN_1810486 | RAB34      | FALSE | FALSE |
| ILMN_1763627 | TNPO1      | FALSE | FALSE |
| ILMN_1727281 | TAF6L      | TRUE  | FALSE |
| ILMN_1735735 | KATNB1     | FALSE | FALSE |
| ILMN_1691156 | MT1A       | FALSE | FALSE |
| ILMN_1737413 | MSH2       | TRUE  | FALSE |
| ILMN_1746252 | POLD2      | TRUE  | FALSE |
| ILMN_1730698 | ODF2       | FALSE | FALSE |
| ILMN_2359627 | BCL2L11    | FALSE | FALSE |
| ILMN_1674694 | LINC00669  | FALSE | FALSE |
| ILMN_1764127 | NA         | FALSE | FALSE |
| ILMN_1697665 | CBX3       | FALSE | FALSE |
| ILMN_1774974 | CLUAP1     | FALSE | FALSE |
| ILMN_1739325 | LOC284023  | FALSE | FALSE |
| ILMN_1692545 | NPM1       | FALSE | FALSE |
| ILMN_1778478 | CCDC28B    | FALSE | FALSE |
| ILMN_3301042 | FLVCR1-AS1 | FALSE | FALSE |
| ILMN_1708006 | MICB       | FALSE | FALSE |
| ILMN_1686319 | USP37      | FALSE | FALSE |
| ILMN_2286106 | PAICS      | FALSE | FALSE |
| ILMN_1726064 | PAK1IP1    | FALSE | FALSE |
| ILMN_1715179 | SNRPA1     | FALSE | FALSE |
| ILMN_1787808 | CEP63      | FALSE | FALSE |
| ILMN_2140207 | NA         | FALSE | FALSE |
| ILMN_1696407 | SRSF2      | FALSE | FALSE |
| ILMN_1766408 | CBFB       | FALSE | FALSE |
| ILMN_1703949 | KPNB1      | TRUE  | FALSE |

|              |          |       |       |
|--------------|----------|-------|-------|
| ILMN_3186473 | LCLAT1   | FALSE | FALSE |
| ILMN_1691165 | CLSPN    | FALSE | FALSE |
| ILMN_1676191 | DARS2    | FALSE | FALSE |
| ILMN_2370907 | RAD51D   | FALSE | FALSE |
| ILMN_1793966 | BOLA1    | TRUE  | FALSE |
| ILMN_1707484 | GEMIN6   | FALSE | FALSE |
| ILMN_1669142 | NAA15    | FALSE | TRUE  |
| ILMN_3207233 | ANP32B   | FALSE | FALSE |
| ILMN_2231242 | HMGB1    | FALSE | FALSE |
| ILMN_1680618 | MYC      | FALSE | FALSE |
| ILMN_1751393 | ZNF684   | FALSE | FALSE |
| ILMN_1739032 | TMEM70   | FALSE | FALSE |
| ILMN_1678423 | SPA17    | FALSE | FALSE |
| ILMN_1752947 | COPRS    | FALSE | FALSE |
| ILMN_1665483 | KIAA0020 | FALSE | FALSE |
| ILMN_1723358 | SCARA3   | FALSE | FALSE |
| ILMN_3235326 | SNHG17   | FALSE | FALSE |
| ILMN_3284063 | VDAC3    | FALSE | FALSE |
| ILMN_1656691 | FBXO4    | FALSE | FALSE |
| ILMN_1741477 | SMAD4    | FALSE | FALSE |
| ILMN_1856634 | NFIA     | TRUE  | FALSE |
| ILMN_1758548 | NEK7     | FALSE | FALSE |
| ILMN_3181420 | HMGXB4   | FALSE | FALSE |
| ILMN_1694539 | MAP3K6   | FALSE | FALSE |
| ILMN_1685824 | B4GALT5  | FALSE | FALSE |
| ILMN_2143487 | TAF1B    | FALSE | FALSE |
| ILMN_1757415 | COA7     | TRUE  | FALSE |
| ILMN_1727855 | PEMT     | FALSE | FALSE |
| ILMN_1679754 | ADRA1B   | FALSE | FALSE |
| ILMN_1708936 | EXOSC3   | FALSE | FALSE |
| ILMN_1755811 | FBXO4    | FALSE | FALSE |
| ILMN_1664602 | NA       | FALSE | FALSE |
| ILMN_1769634 | STRA13   | TRUE  | FALSE |
| ILMN_1815141 | MTR      | FALSE | FALSE |
| ILMN_2301722 | PDE8B    | FALSE | FALSE |
| ILMN_1697491 | PRR5L    | FALSE | FALSE |
| ILMN_1657087 | ZNF385B  | FALSE | FALSE |
| ILMN_1811006 | E2F8     | FALSE | FALSE |
| ILMN_1712505 | KDELC1   | FALSE | FALSE |
| ILMN_1759991 | NOL12    | FALSE | TRUE  |
| ILMN_1669722 | LRRC61   | FALSE | FALSE |
| ILMN_1759008 | ZNF689   | FALSE | FALSE |
| ILMN_1708081 | LCLAT1   | FALSE | FALSE |
| ILMN_1761411 | MCMBP    | FALSE | FALSE |
| ILMN_3236825 | RAPGEF5  | FALSE | TRUE  |
| ILMN_2412927 | GMPPB    | FALSE | FALSE |

|              |          |       |       |
|--------------|----------|-------|-------|
| ILMN_1656274 | PRPF38A  | FALSE | FALSE |
| ILMN_2242937 | ARSB     | FALSE | FALSE |
| ILMN_2363668 | YIF1B    | FALSE | FALSE |
| ILMN_1654671 | SLMO1    | FALSE | FALSE |
| ILMN_1658460 | SRSF10   | FALSE | FALSE |
| ILMN_1701711 | BRD8     | FALSE | FALSE |
| ILMN_3238797 | FAM72A   | TRUE  | FALSE |
| ILMN_1731648 | FOXJ2    | FALSE | FALSE |
| ILMN_1673026 | CHCHD3   | FALSE | FALSE |
| ILMN_1721921 | BLMH     | FALSE | FALSE |
| ILMN_3210491 | TOMM40   | FALSE | FALSE |
| ILMN_1690268 | HNRNPUL1 | FALSE | TRUE  |
| ILMN_3287583 | UBB      | FALSE | FALSE |
| ILMN_1804277 | SPRED1   | FALSE | FALSE |
| ILMN_1779584 | UTP18    | FALSE | FALSE |
| ILMN_3208140 | NA       | FALSE | FALSE |
| ILMN_2116594 | GPR89B   | FALSE | FALSE |
| ILMN_1739798 | MALSU1   | FALSE | FALSE |
| ILMN_1808374 | SNTB2    | FALSE | FALSE |
| ILMN_2278235 | CTBP1    | FALSE | FALSE |
| ILMN_3235104 | KIAA1731 | FALSE | FALSE |
| ILMN_1660754 | MIR17HG  | FALSE | FALSE |
| ILMN_1767142 | ZNF280D  | FALSE | FALSE |
| ILMN_2411116 | FGFR1OP  | TRUE  | FALSE |
| ILMN_1730940 | KLHDC3   | FALSE | FALSE |
| ILMN_1801378 | COQ3     | TRUE  | FALSE |
| ILMN_1691798 | ZNF26    | FALSE | FALSE |
| ILMN_1722066 | ARMC1    | FALSE | FALSE |
| ILMN_2380999 | RECQL    | FALSE | FALSE |
| ILMN_1721029 | RHEBL1   | FALSE | FALSE |
| ILMN_1754858 | PASK     | FALSE | FALSE |
| ILMN_1698209 | AGPS     | TRUE  | FALSE |
| ILMN_1670542 | AK2      | TRUE  | FALSE |
| ILMN_1708537 | RBPJ     | FALSE | FALSE |
| ILMN_1724986 | WDR53    | FALSE | FALSE |
| ILMN_2209515 | SNORD56  | FALSE | FALSE |
| ILMN_3259509 | C11orf86 | FALSE | FALSE |
| ILMN_2194649 | TADA1    | FALSE | FALSE |
| ILMN_1736623 | NCKIPSD  | FALSE | FALSE |
| ILMN_1666670 | RBX1     | FALSE | FALSE |
| ILMN_1784709 | GNPDA1   | FALSE | FALSE |
| ILMN_1749096 | BCL2L10  | TRUE  | FALSE |
| ILMN_1680193 | PAXIP1   | FALSE | FALSE |
| ILMN_1751589 | NUDCD2   | FALSE | FALSE |
| ILMN_1697440 | PRPF4    | FALSE | FALSE |
| ILMN_2226955 | VOPP1    | FALSE | FALSE |

|              |           |       |       |
|--------------|-----------|-------|-------|
| ILMN_3268880 | LINC00263 | FALSE | FALSE |
| ILMN_2215119 | SYNJ2     | FALSE | FALSE |
| ILMN_1676302 | PCED1A    | FALSE | FALSE |
| ILMN_2409793 | MAZ       | FALSE | FALSE |
| ILMN_1806432 | NT5C      | FALSE | FALSE |
| ILMN_1655504 | IFT81     | FALSE | FALSE |
| ILMN_1705737 | IMPDH2    | FALSE | FALSE |
| ILMN_3251232 | HMG2      | FALSE | FALSE |
| ILMN_1741133 | NME1      | TRUE  | FALSE |
| ILMN_1744308 | DHX33     | TRUE  | FALSE |
| ILMN_1673369 | SEPHS1    | FALSE | FALSE |
| ILMN_2328972 | DNMT3B    | FALSE | FALSE |
| ILMN_2099594 | SRP9      | FALSE | FALSE |
| ILMN_1668179 | HNRNPF    | FALSE | FALSE |
| ILMN_1685781 | C14orf142 | FALSE | FALSE |
| ILMN_1687201 | APOL6     | FALSE | FALSE |
| ILMN_1659166 | SLC6A15   | FALSE | FALSE |
| ILMN_1689972 | RRP9      | FALSE | FALSE |
| ILMN_1726840 | B3GALNT1  | FALSE | FALSE |
| ILMN_1675626 | PRPF38A   | FALSE | FALSE |
| ILMN_1690576 | NA        | FALSE | FALSE |
| ILMN_1661399 | ARL4A     | FALSE | FALSE |
| ILMN_1755911 | ING5      | TRUE  | FALSE |
| ILMN_1697024 | STYX      | FALSE | FALSE |
| ILMN_1652749 | ERF       | FALSE | FALSE |
| ILMN_2214278 | ANKRD32   | FALSE | FALSE |
| ILMN_1756793 | PAPD7     | FALSE | FALSE |
| ILMN_1790650 | FOPNL     | FALSE | FALSE |
| ILMN_3247018 | SNORA67   | FALSE | TRUE  |
| ILMN_1780298 | FAM86A    | FALSE | FALSE |
| ILMN_1662617 | PPP2R3C   | FALSE | FALSE |
| ILMN_1760933 | PEX10     | TRUE  | FALSE |
| ILMN_3181328 | NA        | FALSE | FALSE |
| ILMN_1812545 | DMC1      | FALSE | FALSE |
| ILMN_1750051 | AMER1     | FALSE | TRUE  |
| ILMN_2173611 | MT1E      | FALSE | TRUE  |
| ILMN_1660063 | POLE4     | FALSE | FALSE |
| ILMN_2138435 | MRPS27    | FALSE | FALSE |
| ILMN_1683059 | SIRT5     | FALSE | TRUE  |
| ILMN_1665859 | RAB27A    | FALSE | FALSE |
| ILMN_3210917 | SET       | FALSE | FALSE |
| ILMN_1730523 | FAM195A   | TRUE  | FALSE |
| ILMN_3202863 | Sep-10    | FALSE | FALSE |
| ILMN_1668960 | MID1IP1   | FALSE | FALSE |
| ILMN_1723117 | IPO9      | FALSE | FALSE |
| ILMN_3206827 | HNRNPA3   | FALSE | FALSE |

|              |          |       |       |
|--------------|----------|-------|-------|
| ILMN_2316104 | IQCB1    | FALSE | FALSE |
| ILMN_3235472 | WDYHV1   | FALSE | FALSE |
| ILMN_1732566 | TMTC3    | FALSE | FALSE |
| ILMN_1812973 | RRP1B    | FALSE | FALSE |
| ILMN_1666727 | ZNF586   | FALSE | TRUE  |
| ILMN_2205245 | GPN2     | FALSE | FALSE |
| ILMN_1765770 | SYCP2    | FALSE | TRUE  |
| ILMN_1690138 | PHF10    | TRUE  | FALSE |
| ILMN_1733045 | RAB36    | FALSE | FALSE |
| ILMN_1696330 | GUF1     | FALSE | FALSE |
| ILMN_1785831 | ZDHHC13  | FALSE | FALSE |
| ILMN_2343010 | BOLA3    | FALSE | FALSE |
| ILMN_2054442 | ZNF146   | FALSE | FALSE |
| ILMN_1739083 | SIRT1    | TRUE  | FALSE |
| ILMN_2332105 | WRNIP1   | FALSE | FALSE |
| ILMN_1716053 | AK2      | FALSE | FALSE |
| ILMN_1796407 | SS18L2   | FALSE | FALSE |
| ILMN_3239861 | SKIDA1   | FALSE | FALSE |
| ILMN_1660938 | TOE1     | FALSE | FALSE |
| ILMN_1701933 | SNCA     | FALSE | FALSE |
| ILMN_1815346 | TMEM136  | FALSE | FALSE |
| ILMN_2341952 | MRPL35   | TRUE  | FALSE |
| ILMN_1742031 | IFRD2    | FALSE | FALSE |
| ILMN_3236061 | ZNF783   | FALSE | TRUE  |
| ILMN_1654289 | ELK1     | FALSE | TRUE  |
| ILMN_1810327 | HNRNPUL2 | FALSE | FALSE |
| ILMN_1657993 | ADNP     | FALSE | FALSE |
| ILMN_1656682 | AZIN1    | FALSE | FALSE |
| ILMN_3238845 | SMIM11   | FALSE | FALSE |
| ILMN_1904785 | NA       | FALSE | FALSE |
| ILMN_1682747 | FANCA    | FALSE | FALSE |
| ILMN_1665290 | NA       | FALSE | FALSE |
| ILMN_2356895 | MRPL42   | FALSE | FALSE |
| ILMN_1740861 | DTWD1    | FALSE | FALSE |
| ILMN_3207933 | ABCE1    | TRUE  | FALSE |
| ILMN_1752270 | SLC25A40 | TRUE  | FALSE |
| ILMN_2352326 | COASY    | FALSE | FALSE |
| ILMN_3307683 | ZNF695   | FALSE | FALSE |
| ILMN_1784847 | CREBZF   | TRUE  | FALSE |
| ILMN_1726222 | FLOT2    | FALSE | FALSE |
| ILMN_1667405 | ARHGEF39 | FALSE | FALSE |
| ILMN_1735438 | GPM6B    | FALSE | FALSE |
| ILMN_1748916 | TIMM21   | TRUE  | FALSE |
| ILMN_2389528 | MTL5     | TRUE  | FALSE |
| ILMN_1738572 | USP48    | FALSE | FALSE |
| ILMN_1790757 | ADSL     | FALSE | FALSE |



|              |          |       |       |
|--------------|----------|-------|-------|
| ILMN_1718295 | STAC2    | FALSE | FALSE |
| ILMN_1651684 | KIAA0586 | FALSE | FALSE |
| ILMN_1751403 | NUDT15   | FALSE | FALSE |
| ILMN_1789510 | STIP1    | TRUE  | FALSE |
| ILMN_1744647 | CAND1    | FALSE | FALSE |
| ILMN_1810992 | CAD      | FALSE | FALSE |
| ILMN_1777765 | C12orf10 | FALSE | FALSE |
| ILMN_1662483 | NA       | FALSE | FALSE |
| ILMN_1772482 | SLC6A10P | FALSE | FALSE |
| ILMN_1683635 | C11orf70 | FALSE | TRUE  |
| ILMN_1782257 | METTL17  | FALSE | FALSE |
| ILMN_2410772 | KEAP1    | FALSE | TRUE  |
| ILMN_1748034 | KLHDC4   | FALSE | FALSE |
| ILMN_2354649 | SRSF10   | TRUE  | FALSE |
| ILMN_3290800 | SDHD     | FALSE | FALSE |
| ILMN_1657332 | CCDC85B  | FALSE | FALSE |
| ILMN_1806487 | FAM109B  | FALSE | FALSE |
| ILMN_1815882 | HNRNPA1  | TRUE  | FALSE |
| ILMN_2189842 | SNORA10  | FALSE | FALSE |
| ILMN_2153916 | HSPA2    | FALSE | FALSE |
| ILMN_1697802 | SLC25A33 | FALSE | FALSE |
| ILMN_1671791 | PCK2     | TRUE  | FALSE |
| ILMN_1756862 | APOL3    | FALSE | FALSE |
| ILMN_1718607 | TSPAN4   | FALSE | FALSE |
| ILMN_1801262 | RAD51B   | FALSE | FALSE |
| ILMN_1657873 | XPO4     | FALSE | FALSE |
| ILMN_2322935 | MAPKAPK5 | TRUE  | FALSE |
| ILMN_1733396 | CDC25A   | FALSE | FALSE |
| ILMN_2243697 | ZDHHC13  | FALSE | FALSE |
| ILMN_1738712 | GPR180   | FALSE | FALSE |
| ILMN_1746819 | C5       | FALSE | FALSE |
| ILMN_1730351 | TEX19    | FALSE | FALSE |
| ILMN_1664646 | NSUN6    | FALSE | FALSE |
| ILMN_1709257 | RIPPLY3  | FALSE | FALSE |
| ILMN_1663751 | CYCS     | FALSE | FALSE |
| ILMN_1728163 | CTDSP1   | FALSE | FALSE |
| ILMN_1672660 | MBP      | FALSE | FALSE |
| ILMN_1744795 | TBL1X    | FALSE | FALSE |
| ILMN_1712530 | AKAP1    | TRUE  | FALSE |
| ILMN_1770020 | PPIL3    | FALSE | FALSE |
| ILMN_1656248 | CLMP     | FALSE | FALSE |
| ILMN_1804610 | NFX1     | FALSE | FALSE |
| ILMN_1671288 | ODF2     | FALSE | FALSE |
| ILMN_2251978 | PAXBP1   | FALSE | FALSE |
| ILMN_1797332 | NARS2    | TRUE  | FALSE |
| ILMN_1691487 | TRAF2    | FALSE | FALSE |

|              |            |       |       |
|--------------|------------|-------|-------|
| ILMN_2373177 | PANK2      | FALSE | FALSE |
| ILMN_1762436 | UBB        | FALSE | FALSE |
| ILMN_1657884 | NME2       | FALSE | FALSE |
| ILMN_1671257 | DKC1       | TRUE  | FALSE |
| ILMN_2128293 | APIP       | FALSE | FALSE |
| ILMN_1704305 | NIP7       | FALSE | FALSE |
| ILMN_2065822 | MCM3AP-AS1 | FALSE | FALSE |
| ILMN_2083833 | CNOT6L     | FALSE | FALSE |
| ILMN_1803376 | AEBP2      | FALSE | FALSE |
| ILMN_1700923 | ATG4C      | FALSE | FALSE |
| ILMN_2166686 | NUFIP1     | FALSE | TRUE  |
| ILMN_1780806 | ANKRD36B   | FALSE | FALSE |
| ILMN_2120965 | NPAT       | FALSE | FALSE |
| ILMN_2341690 | ELP5       | FALSE | FALSE |
| ILMN_2056002 | ANP32AP1   | FALSE | FALSE |
| ILMN_1791593 | DENND5B    | FALSE | FALSE |
| ILMN_1749081 | AUTS2      | FALSE | FALSE |
| ILMN_1667932 | ANKRD36B   | FALSE | FALSE |
| ILMN_3235113 | TOMM6      | FALSE | FALSE |
| ILMN_2274923 | MOCS2      | FALSE | FALSE |
| ILMN_1716089 | KANK2      | FALSE | FALSE |
| ILMN_1811997 | RNF115     | FALSE | FALSE |
| ILMN_1659682 | GALK2      | FALSE | FALSE |
| ILMN_1789828 | VPS13A     | FALSE | FALSE |
| ILMN_2342240 | MGAT2      | FALSE | FALSE |
| ILMN_1738784 | PPP2R5A    | FALSE | FALSE |
| ILMN_1747195 | PSMB8      | FALSE | FALSE |
| ILMN_1712985 | C17orf58   | TRUE  | FALSE |
| ILMN_3290380 | XRCC6      | FALSE | FALSE |
| ILMN_1712257 | PPP2R3B    | FALSE | FALSE |
| ILMN_3241139 | SNORD57    | FALSE | FALSE |
| ILMN_1706901 | HOXD13     | FALSE | FALSE |
| ILMN_2052871 | TMEM116    | FALSE | FALSE |
| ILMN_1752639 | SLC25A24   | FALSE | FALSE |
| ILMN_1740269 | WNT2B      | FALSE | FALSE |
| ILMN_1805111 | BRWD1      | FALSE | FALSE |
| ILMN_1655403 | ERI2       | FALSE | FALSE |
| ILMN_1729976 | CHAMP1     | FALSE | FALSE |
| ILMN_1669674 | CNPY3      | FALSE | FALSE |
| ILMN_2393296 | GK         | FALSE | FALSE |
| ILMN_1741398 | TTI1       | FALSE | TRUE  |
| ILMN_2140510 | KLHL13     | FALSE | FALSE |
| ILMN_3239217 | TOMM40     | FALSE | TRUE  |
| ILMN_1730999 | TPR        | FALSE | FALSE |
| ILMN_1856315 | NA         | FALSE | FALSE |
| ILMN_1749752 | GAR1       | FALSE | FALSE |

|              |          |       |       |
|--------------|----------|-------|-------|
| ILMN_1655154 | PTBP1    | FALSE | FALSE |
| ILMN_1713088 | MSI2     | FALSE | FALSE |
| ILMN_1789007 | APOC1    | FALSE | FALSE |
| ILMN_2211003 | GAS2L3   | FALSE | FALSE |
| ILMN_1810127 | ZNF789   | FALSE | FALSE |
| ILMN_1712708 | TRIM47   | FALSE | FALSE |
| ILMN_1783681 | MRPL34   | FALSE | FALSE |
| ILMN_1695226 | DIAPH3   | FALSE | FALSE |
| ILMN_1679209 | HSPA9    | FALSE | FALSE |
| ILMN_3251526 | USP13    | FALSE | FALSE |
| ILMN_3199609 | TCP1     | FALSE | FALSE |
| ILMN_2296422 | SMC2     | FALSE | FALSE |
| ILMN_1787595 | B3GALNT1 | FALSE | FALSE |
| ILMN_2325394 | NA       | TRUE  | FALSE |
| ILMN_2390299 | PSMB8    | FALSE | FALSE |
| ILMN_2069446 | SAFB2    | FALSE | FALSE |
| ILMN_1652753 | PAAF1    | FALSE | FALSE |
| ILMN_1766154 | MRPL30   | FALSE | FALSE |
| ILMN_1743097 | XRCC6    | FALSE | FALSE |
| ILMN_1663220 | MRPL22   | FALSE | FALSE |
| ILMN_1673991 | ATIC     | TRUE  | FALSE |
| ILMN_2163070 | KHDC1    | FALSE | FALSE |
| ILMN_3248773 | SNHG15   | FALSE | FALSE |
| ILMN_1742238 | SET      | FALSE | FALSE |
| ILMN_1738796 | PITPNC1  | FALSE | FALSE |
| ILMN_1748254 | ZNF714   | FALSE | FALSE |
| ILMN_2330170 | MYBPC1   | FALSE | FALSE |
| ILMN_1786015 | CTCF     | FALSE | FALSE |
| ILMN_3250592 | FAM86A   | FALSE | FALSE |
| ILMN_1791949 | PGBD1    | FALSE | FALSE |
| ILMN_2350607 | NDUFAF5  | FALSE | FALSE |
| ILMN_2166506 | XRCC6    | FALSE | FALSE |
| ILMN_1751143 | TMEM243  | FALSE | FALSE |
| ILMN_1707634 | CMC1     | FALSE | FALSE |
| ILMN_2206716 | JTB      | FALSE | FALSE |
| ILMN_1780292 | NA       | TRUE  | FALSE |
| ILMN_2196097 | PPP2CA   | FALSE | FALSE |
| ILMN_1718033 | LYPD5    | FALSE | FALSE |
| ILMN_1716596 | NSMAF    | FALSE | FALSE |
| ILMN_1803317 | C9orf114 | FALSE | FALSE |
| ILMN_3179371 | HNRNPK   | FALSE | FALSE |
| ILMN_2371147 | BCL7C    | FALSE | FALSE |
| ILMN_1716862 | PPM1B    | FALSE | FALSE |
| ILMN_1664367 | COQ6     | FALSE | FALSE |
| ILMN_1686664 | MT2A     | FALSE | FALSE |
| ILMN_3247906 | RNF114   | TRUE  | TRUE  |

|              |          |       |       |
|--------------|----------|-------|-------|
| ILMN_1762224 | HPS3     | FALSE | FALSE |
| ILMN_1775901 | PHF5A    | FALSE | FALSE |
| ILMN_1779855 | HSD17B6  | FALSE | FALSE |
| ILMN_1705774 | TIGD5    | FALSE | FALSE |
| ILMN_1762095 | TMTC4    | FALSE | FALSE |
| ILMN_1746393 | TSEN2    | FALSE | FALSE |
| ILMN_2383964 | CDCA4    | FALSE | FALSE |
| ILMN_1774589 | IQCC     | FALSE | TRUE  |
| ILMN_1803312 | DIMT1    | TRUE  | FALSE |
| ILMN_2092756 | TMEM109  | FALSE | FALSE |
| ILMN_2369403 | PALM2    | FALSE | FALSE |
| ILMN_1682896 | PAXBP1   | FALSE | FALSE |
| ILMN_1804737 | RAVER2   | FALSE | FALSE |
| ILMN_1773968 | SERBP1   | FALSE | FALSE |
| ILMN_1714428 | FBXO17   | FALSE | FALSE |
| ILMN_1687724 | RAP1GDS1 | FALSE | FALSE |
| ILMN_1680782 | PATL1    | FALSE | FALSE |
| ILMN_1669484 | WDR6     | FALSE | TRUE  |
| ILMN_2398926 | C17orf58 | TRUE  | FALSE |
| ILMN_1731518 | PLD6     | FALSE | FALSE |
| ILMN_1680850 | RECQL    | FALSE | FALSE |
| ILMN_1715886 | CNOT7    | FALSE | FALSE |
| ILMN_1664641 | MED4     | FALSE | FALSE |
| ILMN_1722059 | SAFB     | FALSE | FALSE |
| ILMN_3304200 | ZNF385B  | FALSE | FALSE |
| ILMN_1768393 | SNRPD1   | FALSE | FALSE |
| ILMN_1792173 | TUBGCP4  | FALSE | FALSE |
| ILMN_2082209 | TOX2     | FALSE | FALSE |
| ILMN_1680134 | CARM1    | FALSE | FALSE |
| ILMN_2216918 | SHPK     | FALSE | FALSE |
| ILMN_1801246 | IFITM1   | FALSE | FALSE |
| ILMN_1696510 | GPR89B   | FALSE | FALSE |
| ILMN_1703430 | CCDC94   | FALSE | FALSE |
| ILMN_2345016 | PTGES2   | FALSE | FALSE |
| ILMN_2346831 | MGAT2    | FALSE | FALSE |
| ILMN_3245707 | RIMKLB   | FALSE | FALSE |
| ILMN_1812580 | YDJC     | FALSE | FALSE |
| ILMN_1691181 | TMX1     | FALSE | FALSE |
| ILMN_1806867 | PPM1G    | FALSE | FALSE |
| ILMN_1767747 | HDAC2    | TRUE  | FALSE |
| ILMN_1670821 | TXLNGY   | TRUE  | FALSE |
| ILMN_1680220 | GEN1     | FALSE | FALSE |
| ILMN_1703015 | ZRANB2   | FALSE | FALSE |
| ILMN_1734833 | NBN      | FALSE | FALSE |
| ILMN_1704619 | VPS29    | FALSE | FALSE |
| ILMN_1764410 | GUCD1    | FALSE | FALSE |

|              |         |       |       |
|--------------|---------|-------|-------|
| ILMN_1785914 | CDC6    | FALSE | FALSE |
| ILMN_2397627 | UPF3B   | FALSE | FALSE |
| ILMN_1665730 | ABCB10  | FALSE | FALSE |
| ILMN_1682197 | NFXL1   | TRUE  | FALSE |
| ILMN_2282959 | DNA2    | FALSE | FALSE |
| ILMN_1662049 | AGPAT5  | FALSE | FALSE |
| ILMN_1803652 | C9orf91 | FALSE | FALSE |
| ILMN_1749210 | BUD13   | FALSE | FALSE |
| ILMN_1815043 | MRPS2   | FALSE | FALSE |
| ILMN_1697670 | SRRM1   | FALSE | FALSE |
| ILMN_1756942 | SP3     | FALSE | FALSE |
| ILMN_1736568 | CASP2   | FALSE | FALSE |
| ILMN_1675462 | LSM6    | FALSE | FALSE |
| ILMN_1676946 | AP3M2   | FALSE | FALSE |
| ILMN_1770031 | ABHD10  | FALSE | FALSE |
| ILMN_1690386 | NA      | FALSE | FALSE |
| ILMN_1774086 | CBX3    | FALSE | FALSE |
| ILMN_1740819 | STARD7  | FALSE | FALSE |
| ILMN_2324998 | NGDN    | FALSE | FALSE |
| ILMN_1757627 | ZMYND19 | FALSE | FALSE |
| ILMN_1728132 | LDHB    | FALSE | FALSE |
| ILMN_2051867 | PTCD2   | FALSE | FALSE |
| ILMN_1677723 | ANGPT1  | FALSE | FALSE |
| ILMN_2336130 | NA      | FALSE | FALSE |
| ILMN_1691430 | GSTCD   | FALSE | FALSE |
| ILMN_2214603 | PPP2R3C | FALSE | FALSE |
| ILMN_2346460 | ICE2    | FALSE | FALSE |
| ILMN_1689336 | HOXA10  | FALSE | FALSE |
| ILMN_1803853 | NOL7    | FALSE | FALSE |
| ILMN_1780756 | RBM23   | FALSE | FALSE |
| ILMN_1665775 | Mar-02  | TRUE  | FALSE |
| ILMN_1653129 | CSTF2   | FALSE | FALSE |
| ILMN_2054392 | PPIL1   | FALSE | FALSE |
| ILMN_1698512 | NA      | FALSE | FALSE |
| ILMN_1718706 | ERAL1   | FALSE | FALSE |
| ILMN_2115434 | RAB32   | FALSE | FALSE |
| ILMN_1736130 | RBFA    | TRUE  | FALSE |
| ILMN_1701855 | PPP1CC  | FALSE | FALSE |
| ILMN_1675131 | PIH1D1  | FALSE | FALSE |
| ILMN_2186925 | FOXO1   | FALSE | FALSE |
| ILMN_1795856 | ELF2    | FALSE | FALSE |
| ILMN_1691843 | RNPS1   | FALSE | FALSE |
| ILMN_2301163 | SFR1    | FALSE | FALSE |
| ILMN_1714809 | RPIA    | FALSE | FALSE |
| ILMN_2413158 | PODXL   | FALSE | TRUE  |
| ILMN_3285198 | SET     | FALSE | FALSE |

|              |          |       |       |
|--------------|----------|-------|-------|
| ILMN_1698487 | SDHD     | FALSE | FALSE |
| ILMN_1669901 | NA       | FALSE | FALSE |
| ILMN_1763404 | SRP9     | FALSE | FALSE |
| ILMN_3270626 | NA       | FALSE | FALSE |
| ILMN_1688621 | INIP     | FALSE | FALSE |
| ILMN_1731165 | SLC16A8  | FALSE | TRUE  |
| ILMN_1756220 | DDX18    | TRUE  | FALSE |
| ILMN_2133534 | NA       | FALSE | FALSE |
| ILMN_3242038 | GPX8     | FALSE | FALSE |
| ILMN_1706652 | OGG1     | FALSE | FALSE |
| ILMN_2388425 | EXTL2    | FALSE | FALSE |
| ILMN_1727043 | COLGALT1 | FALSE | FALSE |
| ILMN_3240997 | ARAP3    | FALSE | FALSE |
| ILMN_1761479 | ZC3HC1   | FALSE | FALSE |
| ILMN_3239168 | FAM86C2P | FALSE | FALSE |
| ILMN_1783168 | NETO1    | FALSE | FALSE |
| ILMN_1666634 | FAF1     | FALSE | FALSE |
| ILMN_3228700 | POLD2    | TRUE  | FALSE |
| ILMN_1679891 | NAF1     | FALSE | FALSE |
| ILMN_3247608 | ABCB10   | FALSE | FALSE |
| ILMN_1689445 | POLR2H   | FALSE | FALSE |
| ILMN_1670796 | EXOSC10  | TRUE  | FALSE |
| ILMN_1685112 | TACO1    | FALSE | FALSE |
| ILMN_2398587 | ZNRD1    | FALSE | FALSE |
| ILMN_3176790 | UBXN2B   | FALSE | FALSE |
| ILMN_1758090 | BCCIP    | FALSE | FALSE |
| ILMN_1735055 | TEAD1    | FALSE | FALSE |
| ILMN_2127605 | LRP3     | FALSE | FALSE |
| ILMN_2414014 | RBM10    | FALSE | FALSE |
| ILMN_2120340 | RUVBL2   | FALSE | TRUE  |
| ILMN_3269405 | HNRNPM   | FALSE | FALSE |
| ILMN_1815933 | FTSJ2    | FALSE | FALSE |
| ILMN_2219351 | CENPO    | FALSE | FALSE |
| ILMN_1806106 | GNL3     | FALSE | TRUE  |
| ILMN_1742147 | UBL4A    | FALSE | FALSE |
| ILMN_1670948 | TSR2     | TRUE  | TRUE  |
| ILMN_3238511 | HCG11    | FALSE | FALSE |
| ILMN_2330267 | ABCE1    | FALSE | FALSE |
| ILMN_2049727 | OSER1    | FALSE | FALSE |
| ILMN_1711314 | NUDT5    | TRUE  | FALSE |
| ILMN_1898124 | SNHG15   | FALSE | FALSE |
| ILMN_1681324 | MRPL49   | FALSE | FALSE |
| ILMN_2346727 | MTUS1    | FALSE | TRUE  |
| ILMN_1711492 | PTGES3   | FALSE | FALSE |
| ILMN_1771326 | VWA9     | FALSE | FALSE |
| ILMN_2085446 | ZNF670   | FALSE | TRUE  |

|              |         |       |       |
|--------------|---------|-------|-------|
| ILMN_1680643 | G2E3    | FALSE | FALSE |
| ILMN_2078334 | CNOT10  | FALSE | FALSE |
| ILMN_1730794 | SERTAD4 | FALSE | FALSE |
| ILMN_1655382 | DCLRE1B | FALSE | FALSE |
| ILMN_3299905 | RNFT2   | FALSE | FALSE |
| ILMN_1693045 | TMED1   | FALSE | FALSE |
| ILMN_1787762 | HEATR1  | FALSE | FALSE |
| ILMN_1659156 | ANKRD16 | TRUE  | FALSE |
| ILMN_1761131 | ECI2    | TRUE  | FALSE |
| ILMN_1704672 | NABP2   | FALSE | FALSE |
| ILMN_3238613 | SNORA26 | FALSE | FALSE |
| ILMN_1684663 | ZDHHC13 | FALSE | FALSE |
| ILMN_1764082 | MBOAT1  | FALSE | FALSE |
| ILMN_1657509 | TSEN54  | FALSE | FALSE |
| ILMN_1724009 | SETD6   | TRUE  | FALSE |
| ILMN_1730957 | NA      | FALSE | FALSE |
| ILMN_1698139 | TCEA1   | FALSE | FALSE |
| ILMN_1722390 | CHRA1   | FALSE | FALSE |
| ILMN_1671693 | TPGS2   | FALSE | FALSE |
| ILMN_2140799 | FAM24B  | FALSE | FALSE |
| ILMN_1685856 | FAM92A1 | FALSE | FALSE |
| ILMN_1691294 | CTBP2   | FALSE | FALSE |
| ILMN_1776653 | SCML1   | FALSE | FALSE |
| ILMN_1730630 | CXorf56 | FALSE | FALSE |
| ILMN_1737087 | WDR5    | FALSE | FALSE |
| ILMN_2383707 | ALDH1A2 | FALSE | FALSE |
| ILMN_2136635 | ISCA2   | FALSE | FALSE |
| ILMN_2165473 | MID1IP1 | FALSE | FALSE |
| ILMN_1652123 | HMG1    | FALSE | FALSE |
| ILMN_2082762 | SNORD68 | FALSE | FALSE |
| ILMN_1654141 | ZDHHC20 | FALSE | FALSE |
| ILMN_1808238 | RBPMS2  | FALSE | FALSE |
| ILMN_1657283 | ALKBH5  | FALSE | FALSE |
| ILMN_2313158 | MBNL1   | FALSE | FALSE |
| ILMN_1808768 | ROCK1   | FALSE | FALSE |
| ILMN_1687922 | RP9     | FALSE | FALSE |
| ILMN_2410864 | RAB28   | FALSE | FALSE |
| ILMN_1782954 | UBE2K   | TRUE  | FALSE |
| ILMN_1761594 | FAM35A  | FALSE | FALSE |
| ILMN_2266005 | SMIM11  | FALSE | FALSE |
| ILMN_1659620 | NA      | FALSE | FALSE |
| ILMN_1777526 | MED20   | FALSE | FALSE |
| ILMN_1694504 | RNF220  | FALSE | TRUE  |
| ILMN_1660582 | LIG3    | FALSE | FALSE |
| ILMN_1773645 | GMPPB   | FALSE | FALSE |
| ILMN_3240781 | SNORD17 | FALSE | FALSE |

|              |           |       |       |
|--------------|-----------|-------|-------|
| ILMN_1658110 | FAM210A   | TRUE  | FALSE |
| ILMN_1755352 | TUB       | FALSE | TRUE  |
| ILMN_1789558 | ZC2HC1A   | FALSE | FALSE |
| ILMN_3238712 | SNRNP25   | FALSE | FALSE |
| ILMN_1651506 | TGS1      | FALSE | FALSE |
| ILMN_1712357 | HNRNPK    | FALSE | FALSE |
| ILMN_3208881 | SETD8     | FALSE | FALSE |
| ILMN_1749821 | MED28     | FALSE | FALSE |
| ILMN_1744316 | TATDN3    | FALSE | FALSE |
| ILMN_2186597 | NA        | FALSE | FALSE |
| ILMN_1898692 | NA        | TRUE  | FALSE |
| ILMN_2085722 | ING2      | FALSE | FALSE |
| ILMN_3249624 | PKD1P1    | FALSE | FALSE |
| ILMN_1669273 | PPT1      | FALSE | FALSE |
| ILMN_1796165 | GLRX5     | FALSE | FALSE |
| ILMN_1662198 | RANGAP1   | FALSE | FALSE |
| ILMN_1683273 | SNAPC5    | FALSE | FALSE |
| ILMN_3248057 | NA        | TRUE  | TRUE  |
| ILMN_1674390 | PRKAR1B   | FALSE | FALSE |
| ILMN_1784630 | KBTBD11   | FALSE | FALSE |
| ILMN_1776552 | FUBP1     | FALSE | FALSE |
| ILMN_1700515 | C17orf58  | TRUE  | FALSE |
| ILMN_1808779 | CSTF3     | FALSE | FALSE |
| ILMN_1751571 | RAD23A    | FALSE | FALSE |
| ILMN_1733107 | NOC4L     | FALSE | FALSE |
| ILMN_1703369 | HNRNPA3   | FALSE | FALSE |
| ILMN_1798459 | NA        | TRUE  | FALSE |
| ILMN_1676846 | ABCE1     | TRUE  | FALSE |
| ILMN_1669070 | MIPEP     | FALSE | FALSE |
| ILMN_1782247 | KAT2A     | FALSE | FALSE |
| ILMN_2368292 | TSEN34    | FALSE | FALSE |
| ILMN_1806946 | UBTF      | FALSE | FALSE |
| ILMN_1764770 | OXNAD1    | FALSE | FALSE |
| ILMN_1652085 | MPHOSPH10 | FALSE | FALSE |
| ILMN_1705985 | PIGA      | FALSE | FALSE |
| ILMN_2075189 | SLC35F2   | FALSE | FALSE |
| ILMN_3293681 | PINLYP    | FALSE | FALSE |
| ILMN_1729157 | PGAM5     | FALSE | FALSE |
| ILMN_1664776 | EFR3A     | FALSE | FALSE |
| ILMN_1781281 | B9D1      | TRUE  | FALSE |
| ILMN_1749612 | IMMP1L    | FALSE | FALSE |
| ILMN_1797482 | GCDH      | FALSE | FALSE |
| ILMN_1673960 | MAT2B     | FALSE | FALSE |
| ILMN_1792951 | ZHX2      | FALSE | FALSE |
| ILMN_1711543 | C14orf169 | TRUE  | FALSE |
| ILMN_2263144 | TMEM223   | TRUE  | FALSE |



|              |           |       |       |
|--------------|-----------|-------|-------|
| ILMN_1811367 | MAT2B     | FALSE | FALSE |
| ILMN_1791896 | EBAG9     | TRUE  | FALSE |
| ILMN_1743784 | SHMT1     | FALSE | FALSE |
| ILMN_3209358 | NA        | FALSE | FALSE |
| ILMN_1698258 | DNAJC8    | FALSE | FALSE |
| ILMN_1667796 | NA        | FALSE | FALSE |
| ILMN_1704055 | NA        | FALSE | FALSE |
| ILMN_1782730 | ZNF473    | FALSE | TRUE  |
| ILMN_1716790 | APBB2     | FALSE | FALSE |
| ILMN_1806328 | PDIK1L    | FALSE | FALSE |
| ILMN_3260618 | APIP      | FALSE | FALSE |
| ILMN_1815682 | HMCES     | FALSE | FALSE |
| ILMN_2373495 | H2AFY     | FALSE | FALSE |
| ILMN_2097421 | MRPL51    | FALSE | FALSE |
| ILMN_1667374 | L3HYPDH   | FALSE | FALSE |
| ILMN_2156982 | IMP4      | FALSE | FALSE |
| ILMN_1796235 | CIRH1A    | FALSE | FALSE |
| ILMN_1667016 | FAF1      | FALSE | FALSE |
| ILMN_2181089 | VPRBP     | FALSE | FALSE |
| ILMN_1663684 | NA        | FALSE | FALSE |
| ILMN_1660986 | PER3      | FALSE | FALSE |
| ILMN_3200378 | LOC401127 | FALSE | FALSE |
| ILMN_2066124 | AFG3L2    | FALSE | FALSE |
| ILMN_1667561 | IFRD1     | FALSE | FALSE |
| ILMN_3224204 | PSMG4     | FALSE | FALSE |
| ILMN_3309534 | MIR25     | FALSE | FALSE |
| ILMN_1715583 | BOP1      | FALSE | FALSE |
| ILMN_1730685 | MRPL16    | FALSE | FALSE |
| ILMN_2406892 | URI1      | FALSE | FALSE |
| ILMN_1696591 | RB1       | FALSE | FALSE |
| ILMN_1704313 | GSTCD     | FALSE | FALSE |
| ILMN_3240117 | AIDA      | TRUE  | FALSE |
| ILMN_1679881 | WRN       | TRUE  | FALSE |
| ILMN_1786665 | ZNF519    | FALSE | FALSE |
| ILMN_1678680 | DBR1      | FALSE | FALSE |
| ILMN_2344130 | PSMD4     | FALSE | FALSE |
| ILMN_1731644 | SETDB2    | FALSE | FALSE |
| ILMN_1780700 | GUSBP2    | FALSE | FALSE |
| ILMN_1784753 | PAIP2     | FALSE | FALSE |
| ILMN_1660757 | SRSF6     | FALSE | FALSE |
| ILMN_1789018 | ILF3      | FALSE | FALSE |
| ILMN_1738173 | METTL4    | FALSE | FALSE |
| ILMN_1694596 | FAR2      | FALSE | FALSE |
| ILMN_2223805 | CEP41     | FALSE | FALSE |
| ILMN_1761147 | GABPB1    | FALSE | FALSE |
| ILMN_1704383 | TRIM37    | FALSE | FALSE |

|              |              |       |       |
|--------------|--------------|-------|-------|
| ILMN_1667977 | TAF1B        | TRUE  | FALSE |
| ILMN_1747020 | NA           | FALSE | FALSE |
| ILMN_1784227 | MCRS1        | FALSE | TRUE  |
| ILMN_1662065 | WDR92        | FALSE | FALSE |
| ILMN_1690099 | ITGB1BP1     | FALSE | FALSE |
| ILMN_1710170 | PPAP2C       | FALSE | FALSE |
| ILMN_1712936 | PAXBP1       | FALSE | FALSE |
| ILMN_1703036 | WRNIP1       | FALSE | FALSE |
| ILMN_1670172 | WDR33        | FALSE | FALSE |
| ILMN_1718769 | ITSN1        | FALSE | FALSE |
| ILMN_1804679 | KAT8         | FALSE | FALSE |
| ILMN_3192411 | LINC00263    | FALSE | FALSE |
| ILMN_1776674 | SAC3D1       | TRUE  | FALSE |
| ILMN_1657288 | GUSBP4       | FALSE | FALSE |
| ILMN_3200830 | CCT6P3       | FALSE | FALSE |
| ILMN_1729269 | LOC285074    | FALSE | FALSE |
| ILMN_1789364 | ZNF789       | FALSE | FALSE |
| ILMN_1791400 | ATE1         | FALSE | FALSE |
| ILMN_1654313 | NA           | FALSE | FALSE |
| ILMN_2122952 | CISD1        | FALSE | FALSE |
| ILMN_2296369 | NA           | FALSE | FALSE |
| ILMN_1678605 | CDC123       | FALSE | FALSE |
| ILMN_1770673 | AKNA         | FALSE | FALSE |
| ILMN_1711189 | EXOSC10      | FALSE | FALSE |
| ILMN_1787081 | TADA2A       | FALSE | FALSE |
| ILMN_1773117 | BCOR         | FALSE | FALSE |
| ILMN_1813685 | RAB29        | FALSE | FALSE |
| ILMN_3255144 | LOC100129104 | TRUE  | FALSE |
| ILMN_1666564 | SUMO2        | FALSE | FALSE |
| ILMN_1679318 | ARSJ         | FALSE | FALSE |
| ILMN_3240144 | NA           | FALSE | FALSE |
| ILMN_1706784 | H2AFV        | FALSE | FALSE |
| ILMN_1685413 | ALG8         | TRUE  | FALSE |
| ILMN_2087528 | CPSF3        | FALSE | FALSE |
| ILMN_1735275 | WDSUB1       | FALSE | FALSE |
| ILMN_1803846 | EIF1         | FALSE | FALSE |
| ILMN_1656361 | ARHGAP27     | FALSE | FALSE |
| ILMN_1784328 | SNORD25      | TRUE  | FALSE |
| ILMN_1708077 | DAXX         | FALSE | FALSE |
| ILMN_1894172 | NA           | FALSE | FALSE |
| ILMN_1797107 | SCLT1        | FALSE | FALSE |
| ILMN_1737084 | TXLNA        | FALSE | FALSE |
| ILMN_2370464 | ATRIP        | FALSE | TRUE  |
| ILMN_1723439 | ZYG11A       | FALSE | FALSE |
| ILMN_2198393 | KATNA1       | FALSE | TRUE  |
| ILMN_1716237 | ACOT2        | FALSE | FALSE |

|              |          |       |       |
|--------------|----------|-------|-------|
| ILMN_1708427 | KPNA3    | FALSE | FALSE |
| ILMN_1762407 | CABLES2  | FALSE | FALSE |
| ILMN_1690965 | DHX9     | FALSE | FALSE |
| ILMN_2226324 | MPC1     | FALSE | FALSE |
| ILMN_2384536 | ECI2     | TRUE  | FALSE |
| ILMN_3247008 | SNORD96B | FALSE | FALSE |
| ILMN_1771620 | SNRPB2   | FALSE | FALSE |
| ILMN_1714805 | ZC3H14   | FALSE | FALSE |
| ILMN_1682062 | RYR1     | FALSE | TRUE  |
| ILMN_1702759 | TMX4     | FALSE | FALSE |
| ILMN_1749243 | BANF1    | TRUE  | FALSE |
| ILMN_1880113 | NA       | FALSE | FALSE |
| ILMN_1691747 | KHDRBS3  | FALSE | FALSE |
| ILMN_1788738 | ZNRF3    | FALSE | FALSE |
| ILMN_3244154 | NA       | FALSE | FALSE |
| ILMN_2410771 | KEAP1    | FALSE | TRUE  |
| ILMN_1759729 | NDUFA8   | FALSE | FALSE |
| ILMN_1702198 | HMGN1    | FALSE | TRUE  |
| ILMN_1661945 | SLIRP    | FALSE | FALSE |
| ILMN_1802162 | RFESD    | FALSE | FALSE |
| ILMN_2130838 | UTP11L   | TRUE  | FALSE |
| ILMN_1676763 | PIPSL    | FALSE | FALSE |
| ILMN_2380850 | SDCCAG3  | FALSE | FALSE |
| ILMN_2408938 | LRRC20   | FALSE | FALSE |
| ILMN_1736888 | SAR1B    | FALSE | FALSE |
| ILMN_2082489 | PRMT7    | FALSE | FALSE |
| ILMN_1750596 | CLUAP1   | FALSE | FALSE |
| ILMN_1683927 | ITGAE    | FALSE | FALSE |
| ILMN_1735474 | R3HCC1   | FALSE | FALSE |
| ILMN_1728984 | PA2G4    | FALSE | FALSE |
| ILMN_2107068 | HOXA2    | FALSE | FALSE |
| ILMN_1790530 | HECTD2   | FALSE | FALSE |
| ILMN_1738656 | GLOD4    | TRUE  | FALSE |
| ILMN_2124523 | METTL14  | FALSE | FALSE |
| ILMN_1752273 | KIAA1143 | FALSE | FALSE |
| ILMN_1729767 | TARBP2   | FALSE | FALSE |
| ILMN_2357809 | G3BP1    | FALSE | FALSE |
| ILMN_1746696 | PDS5B    | FALSE | FALSE |
| ILMN_1697614 | NHP2L1   | FALSE | FALSE |
| ILMN_1686194 | CWC27    | FALSE | FALSE |
| ILMN_1800612 | VBP1     | FALSE | FALSE |
| ILMN_1745779 | TCTEX1D2 | FALSE | FALSE |
| ILMN_1814657 | TFAP4    | FALSE | FALSE |
| ILMN_3243302 | NA       | FALSE | FALSE |
| ILMN_1855797 | TMEM194B | FALSE | FALSE |
| ILMN_1745807 | TMEM62   | FALSE | FALSE |

|              |            |       |       |
|--------------|------------|-------|-------|
| ILMN_1799320 | ARRDC1-AS1 | FALSE | FALSE |
| ILMN_3217262 | API5       | FALSE | FALSE |
| ILMN_1671028 | THRAP3     | FALSE | FALSE |
| ILMN_1800276 | RCN1       | FALSE | FALSE |
| ILMN_3231952 | ARL17B     | FALSE | FALSE |
| ILMN_1656196 | E2F6       | FALSE | FALSE |
| ILMN_3248575 | SNORA80E   | TRUE  | FALSE |
| ILMN_1685663 | CYP24A1    | FALSE | TRUE  |
| ILMN_1655635 | METTL3     | FALSE | FALSE |
| ILMN_1761560 | PHF13      | FALSE | FALSE |
| ILMN_1697975 | PHF14      | FALSE | FALSE |
| ILMN_3236945 | PTPMT1     | FALSE | FALSE |
| ILMN_1699206 | FHDC1      | FALSE | FALSE |
| ILMN_2378316 | NUPL1      | FALSE | FALSE |
| ILMN_1742782 | GPANK1     | FALSE | FALSE |
| ILMN_1812080 | PARP16     | FALSE | FALSE |
| ILMN_1715416 | NUP188     | FALSE | FALSE |
| ILMN_1770378 | ANAPC10    | FALSE | FALSE |
| ILMN_1711838 | SLC25A24   | FALSE | FALSE |
| ILMN_2415776 | WVOX       | FALSE | FALSE |
| ILMN_1658728 | ZBTB25     | FALSE | FALSE |
| ILMN_1765621 | HDGF       | FALSE | FALSE |
| ILMN_1813746 | CORO2A     | FALSE | FALSE |
| ILMN_1717727 | HMSD       | FALSE | FALSE |
| ILMN_1671911 | MTA1       | FALSE | FALSE |
| ILMN_1695422 | NCL        | FALSE | FALSE |
| ILMN_1752520 | SLFN11     | FALSE | FALSE |
| ILMN_1708382 | ELP6       | FALSE | FALSE |
| ILMN_1744725 | BTBD6      | FALSE | FALSE |
| ILMN_1660368 | TRRAP      | FALSE | FALSE |
| ILMN_1678165 | LSM7       | FALSE | FALSE |
| ILMN_2374293 | DYRK1A     | FALSE | FALSE |
| ILMN_1705679 | SAFB2      | FALSE | FALSE |
| ILMN_1812934 | DIDO1      | FALSE | FALSE |
| ILMN_3273885 | C8orf88    | FALSE | FALSE |
| ILMN_1701749 | UQCRFS1    | FALSE | FALSE |
| ILMN_1793302 | WDR4       | FALSE | FALSE |
| ILMN_1673711 | HSP90AB1   | FALSE | FALSE |
| ILMN_1728380 | PHOSPHO2   | FALSE | FALSE |
| ILMN_2097954 | TSFM       | FALSE | FALSE |
| ILMN_1740430 | SLC2A4RG   | FALSE | TRUE  |
| ILMN_3191636 | NA         | FALSE | FALSE |
| ILMN_1696038 | LOC150051  | FALSE | FALSE |
| ILMN_1797698 | RBM12      | FALSE | TRUE  |
| ILMN_1696004 | LRRK1      | FALSE | FALSE |
| ILMN_1698402 | NFX1       | FALSE | FALSE |

|              |           |       |       |
|--------------|-----------|-------|-------|
| ILMN_2311497 | RCC1      | FALSE | FALSE |
| ILMN_2363106 | RBM23     | FALSE | FALSE |
| ILMN_1685682 | PCNA      | FALSE | FALSE |
| ILMN_3306028 | NA        | FALSE | FALSE |
| ILMN_1729816 | VDAC3     | FALSE | FALSE |
| ILMN_1804539 | NA        | FALSE | FALSE |
| ILMN_2153485 | NMNAT3    | FALSE | TRUE  |
| ILMN_2331348 | TCOF1     | FALSE | FALSE |
| ILMN_2121282 | MRPS18B   | FALSE | FALSE |
| ILMN_1793643 | MRM1      | FALSE | FALSE |
| ILMN_1682857 | NDUFAF2   | FALSE | FALSE |
| ILMN_2193591 | UNC93B1   | FALSE | FALSE |
| ILMN_2344956 | ACP1      | FALSE | FALSE |
| ILMN_1775943 | BRMS1L    | FALSE | FALSE |
| ILMN_1840273 | STX18-AS1 | FALSE | FALSE |
| ILMN_2088612 | XPO4      | FALSE | FALSE |
| ILMN_1852384 | ERC1      | FALSE | FALSE |
| ILMN_1706583 | DLAT      | FALSE | FALSE |
| ILMN_1673522 | MOCOS     | TRUE  | TRUE  |
| ILMN_3305304 | POLD2     | TRUE  | FALSE |
| ILMN_1740490 | ZFP82     | FALSE | FALSE |
| ILMN_1680682 | TADA2A    | TRUE  | FALSE |
| ILMN_1714738 | SCMH1     | FALSE | FALSE |
| ILMN_1780940 | PPP2R5D   | FALSE | FALSE |
| ILMN_3243457 | ANKLE1    | FALSE | FALSE |
| ILMN_1745813 | KIAA1279  | TRUE  | FALSE |
| ILMN_1797425 | DDX55     | FALSE | FALSE |
| ILMN_1727618 | NDUFAF6   | FALSE | FALSE |
| ILMN_1748819 | MRPL22    | FALSE | FALSE |
| ILMN_1726815 | HIST1H3G  | FALSE | FALSE |
| ILMN_1815134 | PI4K2B    | FALSE | FALSE |
| ILMN_2102580 | UTP20     | FALSE | FALSE |
| ILMN_1813836 | DARS      | TRUE  | FALSE |
| ILMN_3238751 | PMS2P4    | FALSE | FALSE |
| ILMN_2189406 | ARPIN     | TRUE  | FALSE |
| ILMN_1804479 | MRPL18    | TRUE  | FALSE |
| ILMN_1805028 | THOC7     | FALSE | FALSE |
| ILMN_1799579 | CCDC51    | FALSE | FALSE |
| ILMN_1750160 | FASTKD3   | FALSE | FALSE |
| ILMN_1793686 | LOC399815 | FALSE | FALSE |
| ILMN_3226392 | RPF2      | FALSE | FALSE |
| ILMN_1800942 | KCTD6     | FALSE | FALSE |
| ILMN_1742738 | LURAP1    | FALSE | FALSE |
| ILMN_1751338 | NUP133    | FALSE | FALSE |
| ILMN_1737635 | RAD1      | FALSE | FALSE |
| ILMN_1788024 | PCID2     | FALSE | FALSE |

|              |              |       |       |
|--------------|--------------|-------|-------|
| ILMN_1690802 | TRMT112      | TRUE  | FALSE |
| ILMN_1726913 | RBPJ         | FALSE | FALSE |
| ILMN_1664537 | USP11        | FALSE | FALSE |
| ILMN_3251298 | THNSL1       | FALSE | FALSE |
| ILMN_2305544 | DBI          | FALSE | FALSE |
| ILMN_2116299 | FAM110D      | FALSE | FALSE |
| ILMN_1722858 | PPP2CA       | FALSE | FALSE |
| ILMN_1785268 | CD58         | FALSE | FALSE |
| ILMN_1667022 | PASK         | FALSE | FALSE |
| ILMN_1662334 | DNAJA3       | FALSE | TRUE  |
| ILMN_1849192 | LOC100506691 | FALSE | FALSE |
| ILMN_1781419 | C11orf73     | TRUE  | FALSE |
| ILMN_1652735 | RFXAP        | FALSE | FALSE |
| ILMN_1725366 | SLC27A5      | TRUE  | FALSE |
| ILMN_1747052 | ITGA4        | FALSE | FALSE |
| ILMN_1739659 | ZDHHC6       | FALSE | FALSE |
| ILMN_1654812 | UNC93B1      | FALSE | FALSE |
| ILMN_1671621 | PCMT1        | FALSE | FALSE |
| ILMN_3232219 | NA           | FALSE | FALSE |
| ILMN_1743579 | WDR4         | FALSE | FALSE |
| ILMN_1757730 | TTC27        | FALSE | FALSE |
| ILMN_2383754 | GTPBP10      | FALSE | FALSE |
| ILMN_1782993 | DHODH        | FALSE | FALSE |
| ILMN_1763852 | ACACB        | FALSE | FALSE |
| ILMN_1683112 | FANCC        | FALSE | FALSE |
| ILMN_1740395 | RAVER1       | FALSE | FALSE |
| ILMN_2200915 | RIPPLY2      | FALSE | FALSE |
| ILMN_3251565 | RNASEH2C     | FALSE | FALSE |
| ILMN_3250850 | RFESD        | FALSE | FALSE |
| ILMN_1712636 | NVL          | FALSE | FALSE |
| ILMN_1696962 | PDZD8        | FALSE | FALSE |
| ILMN_3274671 | FGF14-AS2    | FALSE | FALSE |
| ILMN_2122953 | CISD1        | FALSE | FALSE |
| ILMN_1798728 | URI1         | FALSE | FALSE |
| ILMN_2124816 | ZNF34        | TRUE  | FALSE |
| ILMN_1729319 | USP7         | FALSE | FALSE |
| ILMN_1669508 | PAF1         | FALSE | FALSE |
| ILMN_1730631 | C2orf44      | FALSE | TRUE  |
| ILMN_1693664 | POMGNT1      | FALSE | FALSE |
| ILMN_3306742 | SIGMAR1      | FALSE | FALSE |
| ILMN_1800530 | AGAP1        | FALSE | FALSE |
| ILMN_1720542 | POLR2I       | FALSE | FALSE |
| ILMN_1725471 | GK           | FALSE | FALSE |
| ILMN_3307930 | RAN          | TRUE  | FALSE |
| ILMN_1655924 | TRNT1        | FALSE | FALSE |
| ILMN_1676555 | TTC26        | FALSE | FALSE |

|              |           |       |       |
|--------------|-----------|-------|-------|
| ILMN_1682402 | SNORD46   | TRUE  | FALSE |
| ILMN_1784678 | PBX1      | FALSE | FALSE |
| ILMN_1781526 | PPP1R8    | FALSE | FALSE |
| ILMN_1759117 | XK        | FALSE | FALSE |
| ILMN_2055477 | EXOSC7    | FALSE | FALSE |
| ILMN_1808661 | TOMM5     | FALSE | FALSE |
| ILMN_1654385 | ASB13     | TRUE  | FALSE |
| ILMN_2207328 | TPGS2     | FALSE | FALSE |
| ILMN_1672378 | ZP3       | FALSE | FALSE |
| ILMN_1679389 | NA        | FALSE | FALSE |
| ILMN_3237419 | NA        | FALSE | FALSE |
| ILMN_1795524 | VWA9      | FALSE | FALSE |
| ILMN_2293992 | RAB28     | FALSE | FALSE |
| ILMN_1792672 | POLR2D    | FALSE | FALSE |
| ILMN_1655684 | SARS2     | FALSE | FALSE |
| ILMN_1782897 | CAPRIN1   | FALSE | FALSE |
| ILMN_1714522 | CLMN      | FALSE | FALSE |
| ILMN_1808148 | SMCHD1    | FALSE | FALSE |
| ILMN_2147306 | PNRC2     | FALSE | FALSE |
| ILMN_1756669 | POGK      | FALSE | FALSE |
| ILMN_2161508 | PHTF2     | FALSE | FALSE |
| ILMN_1671292 | LOC390705 | FALSE | FALSE |
| ILMN_1788022 | CDKAL1    | FALSE | FALSE |
| ILMN_1686432 | ACYP1     | FALSE | FALSE |
| ILMN_1705414 | ELP5      | FALSE | FALSE |
| ILMN_1655844 | TAF1A     | FALSE | FALSE |
| ILMN_1682501 | CNOT1     | FALSE | FALSE |
| ILMN_1750008 | SUPV3L1   | FALSE | TRUE  |
| ILMN_3242211 | TMEM187   | FALSE | FALSE |
| ILMN_1699476 | RPE       | FALSE | FALSE |
| ILMN_1793201 | HAGHL     | FALSE | FALSE |
| ILMN_1806757 | MYBBP1A   | FALSE | FALSE |
| ILMN_1902929 | NA        | FALSE | FALSE |
| ILMN_1762622 | FAM111B   | FALSE | FALSE |
| ILMN_1676833 | CYB5RL    | FALSE | FALSE |
| ILMN_1732550 | NA        | FALSE | FALSE |
| ILMN_2291083 | SLC6A15   | FALSE | FALSE |
| ILMN_1768930 | U2AF2     | FALSE | TRUE  |
| ILMN_2232936 | UQCRH     | FALSE | FALSE |
| ILMN_1679476 | GART      | FALSE | FALSE |
| ILMN_3207406 | LOC727896 | FALSE | FALSE |
| ILMN_1735360 | SDAD1     | FALSE | FALSE |
| ILMN_2377025 | TCOF1     | FALSE | FALSE |
| ILMN_1799688 | CDC23     | FALSE | FALSE |
| ILMN_1810474 | UBE2I     | TRUE  | FALSE |
| ILMN_2147114 | PSPH      | FALSE | FALSE |

|              |           |       |       |
|--------------|-----------|-------|-------|
| ILMN_1803813 | ASTE1     | FALSE | FALSE |
| ILMN_1722838 | MRPL46    | FALSE | FALSE |
| ILMN_1753980 | LRRC37B   | FALSE | TRUE  |
| ILMN_1697735 | EWSR1     | FALSE | TRUE  |
| ILMN_1771411 | ALG6      | FALSE | FALSE |
| ILMN_3241985 | SNORA13   | TRUE  | FALSE |
| ILMN_2155516 | QTRTD1    | FALSE | FALSE |
| ILMN_1761086 | VPS54     | FALSE | FALSE |
| ILMN_1658259 | DRG1      | FALSE | FALSE |
| ILMN_1857265 | NA        | FALSE | FALSE |
| ILMN_2080751 | ADNP2     | FALSE | FALSE |
| ILMN_3307799 | PSMD4     | FALSE | FALSE |
| ILMN_1726659 | THOP1     | FALSE | FALSE |
| ILMN_1808260 | VWA8      | FALSE | FALSE |
| ILMN_2187718 | COX17     | FALSE | FALSE |
| ILMN_1756308 | NAE1      | FALSE | FALSE |
| ILMN_1664167 | RPF2      | TRUE  | FALSE |
| ILMN_1786766 | SNTB2     | FALSE | FALSE |
| ILMN_1709611 | PSMA1     | FALSE | FALSE |
| ILMN_1651513 | SKIV2L2   | FALSE | FALSE |
| ILMN_2092664 | ADSS      | FALSE | FALSE |
| ILMN_1697117 | TBP       | FALSE | FALSE |
| ILMN_3236049 | SNORD12   | FALSE | FALSE |
| ILMN_1662243 | ING1      | FALSE | FALSE |
| ILMN_2293167 | LRR1      | FALSE | FALSE |
| ILMN_1772713 | BMS1      | TRUE  | FALSE |
| ILMN_2124361 | LEAP2     | FALSE | TRUE  |
| ILMN_3291778 | ABCB10    | FALSE | FALSE |
| ILMN_1682339 | C19orf57  | FALSE | FALSE |
| ILMN_2368535 | FBXO17    | FALSE | FALSE |
| ILMN_1772522 | ZBTB14    | FALSE | FALSE |
| ILMN_2132809 | ARHGEF10  | FALSE | FALSE |
| ILMN_3280847 | AK2       | FALSE | FALSE |
| ILMN_1803570 | BRI3BP    | FALSE | FALSE |
| ILMN_1738407 | ULBP1     | FALSE | FALSE |
| ILMN_3307648 | CS        | FALSE | TRUE  |
| ILMN_1706502 | EIF2AK2   | FALSE | FALSE |
| ILMN_3238478 | SNORD11B  | FALSE | FALSE |
| ILMN_1702177 | GLO1      | FALSE | FALSE |
| ILMN_1657139 | ADAT1     | FALSE | FALSE |
| ILMN_2357471 | CASC5     | FALSE | FALSE |
| ILMN_1756355 | NDUFS3    | FALSE | FALSE |
| ILMN_1779951 | ANKRD7    | FALSE | FALSE |
| ILMN_3182893 | NA        | FALSE | FALSE |
| ILMN_1660199 | ACAA2     | FALSE | FALSE |
| ILMN_3243366 | KIAA1211L | FALSE | FALSE |



|              |          |       |       |
|--------------|----------|-------|-------|
| ILMN_3237209 | TOMM40   | FALSE | TRUE  |
| ILMN_1765520 | MTIF2    | FALSE | FALSE |
| ILMN_2408450 | UBA5     | FALSE | FALSE |
| ILMN_2151579 | HMGN1    | FALSE | FALSE |
| ILMN_3246247 | PKD1P1   | FALSE | FALSE |
| ILMN_2174729 | ZNF318   | FALSE | FALSE |
| ILMN_2352042 | MRPL4    | FALSE | FALSE |
| ILMN_1792092 | ZCCHC8   | FALSE | FALSE |
| ILMN_2360184 | INVS     | FALSE | FALSE |
| ILMN_2120072 | FAM161A  | FALSE | FALSE |
| ILMN_1784799 | TRIM59   | FALSE | FALSE |
| ILMN_1677887 | PMS2     | FALSE | FALSE |
| ILMN_3205264 | NA       | FALSE | FALSE |
| ILMN_1765146 | IFNAR2   | FALSE | FALSE |
| ILMN_1844611 | NA       | FALSE | TRUE  |
| ILMN_1706706 | DCAF7    | FALSE | FALSE |
| ILMN_1702171 | LPCAT1   | FALSE | FALSE |
| ILMN_1812571 | RAB35    | FALSE | FALSE |
| ILMN_2129859 | FASTKD3  | FALSE | FALSE |
| ILMN_1750052 | NOP14    | FALSE | FALSE |
| ILMN_1674051 | CCHCR1   | FALSE | FALSE |
| ILMN_1757317 | LARS     | FALSE | FALSE |
| ILMN_1789616 | NUPL2    | FALSE | FALSE |
| ILMN_1681124 | C19orf48 | FALSE | FALSE |
| ILMN_2182198 | ICT1     | TRUE  | FALSE |
| ILMN_2131880 | DPY30    | FALSE | FALSE |
| ILMN_1695362 | ZNF32    | TRUE  | FALSE |
| ILMN_1674859 | NA       | FALSE | FALSE |
| ILMN_1659075 | HLA-DOA  | FALSE | FALSE |
| ILMN_2398039 | TCERG1   | FALSE | FALSE |
| ILMN_1688753 | PTDSS1   | TRUE  | FALSE |
| ILMN_3275696 | SNX5     | FALSE | FALSE |
| ILMN_1657632 | ZMYM6NB  | FALSE | FALSE |
| ILMN_1718152 | DEPDC7   | FALSE | FALSE |
| ILMN_1698404 | NA       | FALSE | TRUE  |
| ILMN_1781077 | CEP120   | FALSE | FALSE |
| ILMN_1802627 | PSMG3    | FALSE | FALSE |
| ILMN_1796005 | TERT     | FALSE | FALSE |
| ILMN_1751075 | SETD4    | FALSE | FALSE |
| ILMN_2189605 | FAM122B  | FALSE | FALSE |
| ILMN_2273103 | ELK4     | FALSE | FALSE |
| ILMN_1812289 | CDK5RAP1 | FALSE | FALSE |
| ILMN_3208027 | NA       | FALSE | FALSE |
| ILMN_1705871 | DDHD2    | FALSE | FALSE |
| ILMN_1744835 | MRPL21   | TRUE  | FALSE |
| ILMN_2342121 | PSMD13   | FALSE | FALSE |

|              |           |       |       |
|--------------|-----------|-------|-------|
| ILMN_1677483 | EXOSC1    | FALSE | FALSE |
| ILMN_2055930 | FARSB     | FALSE | FALSE |
| ILMN_3250899 | NA        | FALSE | FALSE |
| ILMN_1673215 | PCBP1     | FALSE | FALSE |
| ILMN_1664177 | ATXN7L2   | FALSE | FALSE |
| ILMN_1742250 | CCNH      | FALSE | FALSE |
| ILMN_1768449 | PRPSAP1   | FALSE | FALSE |
| ILMN_2298860 | NA        | FALSE | FALSE |
| ILMN_1680856 | MAMLD1    | FALSE | FALSE |
| ILMN_1656145 | GOT1      | FALSE | TRUE  |
| ILMN_2323302 | SON       | FALSE | FALSE |
| ILMN_1671158 | MRPL13    | FALSE | FALSE |
| ILMN_1781121 | TWISTNB   | FALSE | FALSE |
| ILMN_1809883 | CCDC134   | TRUE  | FALSE |
| ILMN_3248026 | RBM27     | FALSE | FALSE |
| ILMN_1732187 | TMEM143   | FALSE | FALSE |
| ILMN_1784785 | COPS7B    | FALSE | FALSE |
| ILMN_1657836 | PLEKHG2   | FALSE | FALSE |
| ILMN_1857017 | SNX8      | FALSE | FALSE |
| ILMN_1699606 | NA        | FALSE | FALSE |
| ILMN_1659517 | WDR89     | FALSE | FALSE |
| ILMN_1689342 | NUBP1     | FALSE | FALSE |
| ILMN_1705390 | KLHL22    | FALSE | FALSE |
| ILMN_2193717 | RAB42     | FALSE | FALSE |
| ILMN_1743432 | DGUOK     | FALSE | FALSE |
| ILMN_1721337 | MRPS18B   | TRUE  | FALSE |
| ILMN_1679322 | SH2D4A    | FALSE | FALSE |
| ILMN_1814820 | NA        | FALSE | FALSE |
| ILMN_1697268 | EMILIN2   | FALSE | FALSE |
| ILMN_1782795 | SMPD4     | FALSE | FALSE |
| ILMN_3290136 | LOC643733 | FALSE | FALSE |
| ILMN_1681899 | NA        | FALSE | FALSE |
| ILMN_2356890 | MRPL42    | FALSE | FALSE |
| ILMN_1855325 | NA        | FALSE | FALSE |
| ILMN_1733696 | IMP3      | FALSE | FALSE |
| ILMN_1689234 | ZFP62     | FALSE | FALSE |
| ILMN_1794349 | XYLB      | FALSE | FALSE |
| ILMN_1669972 | NCR3LG1   | FALSE | FALSE |
| ILMN_1726743 | MRPS30    | FALSE | FALSE |
| ILMN_1676848 | NA        | FALSE | FALSE |
| ILMN_1790410 | DROSHA    | FALSE | FALSE |
| ILMN_1740345 | THYN1     | FALSE | FALSE |
| ILMN_1803217 | GPRIN2    | FALSE | FALSE |
| ILMN_1657949 | RHEB      | FALSE | FALSE |
| ILMN_2357062 | IL1RAP    | FALSE | FALSE |
| ILMN_1763638 | BCAR3     | FALSE | FALSE |

|              |             |       |       |
|--------------|-------------|-------|-------|
| ILMN_1795678 | POLR3C      | FALSE | FALSE |
| ILMN_1766176 | RAP1A       | FALSE | FALSE |
| ILMN_1724479 | NR2C2       | FALSE | FALSE |
| ILMN_1728355 | PSMD4       | FALSE | FALSE |
| ILMN_2055165 | MRFAP1      | TRUE  | FALSE |
| ILMN_1759870 | NA          | FALSE | FALSE |
| ILMN_1700766 | ZNF324B     | FALSE | FALSE |
| ILMN_1738263 | PIGU        | FALSE | TRUE  |
| ILMN_3239621 | SNRNP27     | FALSE | FALSE |
| ILMN_1795007 | C2orf47     | FALSE | FALSE |
| ILMN_1699384 | PPP2R5D     | FALSE | FALSE |
| ILMN_2290686 | SNX7        | FALSE | FALSE |
| ILMN_1786426 | IGFLR1      | TRUE  | FALSE |
| ILMN_2328666 | CD83        | FALSE | FALSE |
| ILMN_1763745 | CCNJL       | FALSE | FALSE |
| ILMN_1737096 | CLDN10      | FALSE | FALSE |
| ILMN_1776516 | ITPKA       | FALSE | FALSE |
| ILMN_3276203 | NA          | FALSE | FALSE |
| ILMN_1689774 | MRFAP1L1    | TRUE  | FALSE |
| ILMN_1709605 | MANEAL      | FALSE | FALSE |
| ILMN_1714087 | DGKH        | FALSE | FALSE |
| ILMN_1726239 | TBCA        | FALSE | FALSE |
| ILMN_1715133 | NA          | FALSE | FALSE |
| ILMN_2214144 | TWSG1       | FALSE | FALSE |
| ILMN_1689070 | COQ7        | FALSE | FALSE |
| ILMN_2387090 | CGGBP1      | FALSE | FALSE |
| ILMN_2290618 | SEC22C      | FALSE | FALSE |
| ILMN_3247679 | SNORA52     | FALSE | FALSE |
| ILMN_1658909 | OSGEPL1     | FALSE | FALSE |
| ILMN_2404454 | NLE1        | FALSE | FALSE |
| ILMN_1696846 | MIR4435-1HG | FALSE | FALSE |
| ILMN_1783728 | TBRG4       | FALSE | FALSE |
| ILMN_1785177 | DNAJC14     | TRUE  | FALSE |
| ILMN_1782178 | FLVCR1-AS1  | FALSE | FALSE |
| ILMN_1678775 | NA          | FALSE | FALSE |
| ILMN_2396648 | EXOSC1      | FALSE | FALSE |
| ILMN_3299583 | CKS1B       | FALSE | FALSE |
| ILMN_1660343 | NA          | FALSE | FALSE |
| ILMN_1795976 | SFXN2       | FALSE | FALSE |
| ILMN_1794473 | JADE1       | FALSE | FALSE |
| ILMN_1712320 | DDX50       | TRUE  | FALSE |
| ILMN_1697218 | MED22       | FALSE | TRUE  |
| ILMN_1736460 | MDM1        | FALSE | FALSE |
| ILMN_1704398 | FZD9        | FALSE | TRUE  |
| ILMN_1803939 | YIPF6       | FALSE | FALSE |
| ILMN_1759154 | NA          | FALSE | FALSE |

|              |           |       |       |
|--------------|-----------|-------|-------|
| ILMN_1798543 | STK17B    | TRUE  | FALSE |
| ILMN_1718424 | MRPS28    | FALSE | FALSE |
| ILMN_3260715 | CRTC3     | FALSE | FALSE |
| ILMN_1696375 | TTC31     | FALSE | FALSE |
| ILMN_1730201 | DTNA      | FALSE | FALSE |
| ILMN_1762712 | HHEX      | FALSE | FALSE |
| ILMN_1665571 | LINC01184 | FALSE | FALSE |
| ILMN_2383163 | DEPDC7    | FALSE | FALSE |
| ILMN_3226082 | RPL7L1    | FALSE | FALSE |
| ILMN_1729314 | PRG2      | FALSE | TRUE  |
| ILMN_1682176 | CLEC3B    | FALSE | FALSE |
| ILMN_2242068 | NA        | FALSE | TRUE  |
| ILMN_1786658 | BOLA3     | FALSE | FALSE |
| ILMN_2227385 | SLC16A14  | FALSE | FALSE |
| ILMN_2397230 | USP16     | FALSE | FALSE |
| ILMN_1720242 | NA        | FALSE | FALSE |
| ILMN_1733667 | DHX35     | FALSE | TRUE  |
| ILMN_1715672 | HPCAL1    | FALSE | FALSE |
| ILMN_1765522 | PPM1G     | FALSE | FALSE |
| ILMN_1796243 | SLC13A3   | FALSE | FALSE |
| ILMN_2341363 | ATP5A1    | FALSE | FALSE |
| ILMN_1783996 | EXO5      | FALSE | FALSE |
| ILMN_1726199 | ZNF594    | FALSE | FALSE |
| ILMN_2180997 | GTF2IRD2B | FALSE | FALSE |
| ILMN_1663816 | CCDC148   | FALSE | FALSE |
| ILMN_1874506 | NA        | FALSE | FALSE |
| ILMN_1654571 | FCHO1     | FALSE | FALSE |
| ILMN_1728711 | RGS3      | FALSE | FALSE |
| ILMN_2395055 | LPPR5     | FALSE | FALSE |
| ILMN_1777726 | USP48     | FALSE | FALSE |
| ILMN_1667257 | SDHB      | FALSE | FALSE |
| ILMN_1814661 | PHLPP1    | FALSE | FALSE |
| ILMN_1811555 | SWI5      | FALSE | FALSE |
| ILMN_1658746 | PTPLAD1   | FALSE | FALSE |
| ILMN_1757636 | SETD9     | FALSE | FALSE |
| ILMN_2326793 | NUP98     | FALSE | FALSE |
| ILMN_1689747 | NOL8      | FALSE | FALSE |
| ILMN_1701477 | CCDC101   | FALSE | FALSE |
| ILMN_1820787 | NA        | FALSE | FALSE |
| ILMN_1709162 | SHCBP1    | TRUE  | FALSE |
| ILMN_1880086 | NA        | FALSE | FALSE |
| ILMN_1766851 | TMEM126B  | FALSE | FALSE |
| ILMN_1757408 | ZNF256    | FALSE | FALSE |
| ILMN_1700487 | TOP3A     | FALSE | FALSE |
| ILMN_2300636 | HMGXB4    | FALSE | FALSE |
| ILMN_1686478 | NA        | FALSE | FALSE |

|              |              |       |       |
|--------------|--------------|-------|-------|
| ILMN_2090782 | GCSH         | TRUE  | FALSE |
| ILMN_1760796 | PDE4DIP      | FALSE | FALSE |
| ILMN_2270015 | AADAT        | FALSE | FALSE |
| ILMN_1807919 | TNS1         | FALSE | FALSE |
| ILMN_1703573 | DNAJC17      | FALSE | FALSE |
| ILMN_1781454 | RAE1         | FALSE | TRUE  |
| ILMN_3236536 | IMMP1L       | FALSE | FALSE |
| ILMN_1665601 | THAP4        | TRUE  | FALSE |
| ILMN_1677292 | C5orf30      | FALSE | FALSE |
| ILMN_1653324 | IL22RA2      | FALSE | FALSE |
| ILMN_1809193 | PSEN1        | FALSE | FALSE |
| ILMN_1764323 | METTL23      | TRUE  | TRUE  |
| ILMN_3245413 | DENND5A      | FALSE | FALSE |
| ILMN_1742547 | NRP1         | FALSE | FALSE |
| ILMN_2388539 | OGFOD3       | FALSE | FALSE |
| ILMN_2088825 | ACAP2        | FALSE | FALSE |
| ILMN_2405156 | PPAP2C       | FALSE | FALSE |
| ILMN_1787511 | THUMP2       | TRUE  | FALSE |
| ILMN_2246956 | BCL2         | FALSE | FALSE |
| ILMN_1811966 | PGGT1B       | FALSE | FALSE |
| ILMN_1657041 | NA           | FALSE | FALSE |
| ILMN_1693107 | MLH3         | FALSE | FALSE |
| ILMN_3249598 | RGS21        | FALSE | FALSE |
| ILMN_2147920 | BRD7P3       | FALSE | FALSE |
| ILMN_2250048 | KIF18B       | FALSE | FALSE |
| ILMN_1702763 | ZMYM1        | FALSE | FALSE |
| ILMN_1725346 | SNAPC1       | FALSE | FALSE |
| ILMN_1777663 | TOP2B        | FALSE | FALSE |
| ILMN_2376416 | UBXN11       | FALSE | FALSE |
| ILMN_1692996 | NA           | FALSE | FALSE |
| ILMN_1742256 | NA           | FALSE | FALSE |
| ILMN_1787186 | NOV          | FALSE | FALSE |
| ILMN_1661650 | SMEK2        | FALSE | FALSE |
| ILMN_1665581 | HAUS6        | FALSE | FALSE |
| ILMN_1737738 | NDUFA12      | FALSE | FALSE |
| ILMN_2198575 | C5orf34      | FALSE | FALSE |
| ILMN_1689807 | NA           | FALSE | FALSE |
| ILMN_1760400 | TTI2         | FALSE | FALSE |
| ILMN_1678140 | NA           | FALSE | FALSE |
| ILMN_1784540 | KBTBD2       | FALSE | TRUE  |
| ILMN_2381769 | ATE1         | FALSE | FALSE |
| ILMN_1779428 | CCDC184      | FALSE | FALSE |
| ILMN_1813120 | MAP4K3       | FALSE | FALSE |
| ILMN_3251881 | LOC100130503 | FALSE | FALSE |
| ILMN_1661307 | JRK          | FALSE | TRUE  |
| ILMN_2334587 | HNRNPC       | FALSE | FALSE |

|              |           |       |       |
|--------------|-----------|-------|-------|
| ILMN_1714093 | RMND5A    | FALSE | FALSE |
| ILMN_1877756 | NA        | FALSE | FALSE |
| ILMN_3255978 | FAM35A    | FALSE | FALSE |
| ILMN_1664292 | ZNF415    | FALSE | FALSE |
| ILMN_1714219 | FAM106A   | FALSE | FALSE |
| ILMN_1658427 | NA        | FALSE | FALSE |
| ILMN_1801869 | WDR75     | FALSE | FALSE |
| ILMN_1702419 | SLC35D3   | FALSE | FALSE |
| ILMN_1694487 | NA        | FALSE | FALSE |
| ILMN_1672741 | ITSN1     | FALSE | FALSE |
| ILMN_1659926 | ST7L      | FALSE | FALSE |
| ILMN_1712314 | DUSP9     | FALSE | FALSE |
| ILMN_1764714 | C19orf80  | FALSE | FALSE |
| ILMN_1794987 | C17orf100 | TRUE  | FALSE |
| ILMN_2085362 | FUCA2     | FALSE | FALSE |
| ILMN_1674782 | LINC01116 | FALSE | FALSE |
| ILMN_1669057 | NA        | FALSE | FALSE |
| ILMN_3205604 | FAM185A   | FALSE | FALSE |
| ILMN_1776267 | CLN6      | FALSE | FALSE |
| ILMN_2053567 | FASTKD2   | FALSE | TRUE  |
| ILMN_1692072 | CENPBD1   | FALSE | FALSE |
| ILMN_2092118 | FPR1      | FALSE | FALSE |
| ILMN_1781225 | MORC2-AS1 | FALSE | FALSE |
| ILMN_1651486 | COX11     | FALSE | FALSE |
| ILMN_1746027 | GNAL      | FALSE | FALSE |
| ILMN_1662147 | MANEAL    | FALSE | FALSE |
| ILMN_1706718 | TMEM80    | FALSE | FALSE |
| ILMN_1745764 | ESYT3     | FALSE | FALSE |
| ILMN_2399503 | UBN1      | FALSE | FALSE |
| ILMN_1776121 | KIAA1211L | TRUE  | FALSE |
| ILMN_1719826 | LOC441956 | FALSE | FALSE |
| ILMN_1722045 | ARSB      | FALSE | FALSE |
| ILMN_1732336 | RFC2      | FALSE | FALSE |
| ILMN_1670901 | COX10     | FALSE | FALSE |
| ILMN_1724183 | CDKL1     | FALSE | FALSE |
| ILMN_1654436 | NA        | FALSE | FALSE |
| ILMN_1773247 | ZNF410    | FALSE | FALSE |
| ILMN_1793578 | ZFP37     | FALSE | FALSE |
| ILMN_1708950 | ASPHD1    | FALSE | FALSE |
| ILMN_1687403 | MRPL40    | FALSE | FALSE |
| ILMN_1658399 | KLRG1     | FALSE | FALSE |
| ILMN_1745798 | GTF2F2    | FALSE | FALSE |
| ILMN_3305339 | UBA5      | FALSE | FALSE |
| ILMN_2115154 | NUPL2     | FALSE | FALSE |
| ILMN_1763641 | ZNF614    | FALSE | FALSE |
| ILMN_3268535 | HEXA-AS1  | FALSE | FALSE |

|              |           |       |       |
|--------------|-----------|-------|-------|
| ILMN_1686151 | NA        | FALSE | FALSE |
| ILMN_1807981 | SIGIRR    | FALSE | FALSE |
| ILMN_1770087 | MOCS2     | FALSE | FALSE |
| ILMN_3179565 | NA        | FALSE | FALSE |
| ILMN_1698191 | SCML2     | FALSE | FALSE |
| ILMN_1715096 | FAXC      | FALSE | FALSE |
| ILMN_3193999 | NA        | FALSE | FALSE |
| ILMN_2394552 | WNK3      | FALSE | FALSE |
| ILMN_1666757 | NA        | FALSE | FALSE |
| ILMN_2387712 | AK5       | FALSE | FALSE |
| ILMN_1666939 | NA        | FALSE | FALSE |
| ILMN_1653666 | KLHL7     | FALSE | FALSE |
| ILMN_1794692 | DNMT3B    | FALSE | FALSE |
| ILMN_1904931 | KCNQ5     | FALSE | FALSE |
| ILMN_1788813 | RASL10B   | FALSE | FALSE |
| ILMN_2059549 | SYK       | FALSE | FALSE |
| ILMN_1680967 | SARNP     | FALSE | FALSE |
| ILMN_1806502 | ZNF165    | FALSE | FALSE |
| ILMN_2139125 | LRFN5     | FALSE | FALSE |
| ILMN_3257884 | HMGXB4    | FALSE | FALSE |
| ILMN_1663562 | NA        | FALSE | FALSE |
| ILMN_1805827 | PPA1      | TRUE  | FALSE |
| ILMN_3237971 | SNORD11   | FALSE | FALSE |
| ILMN_2223010 | VBP1      | FALSE | FALSE |
| ILMN_2046611 | MCOLN3    | FALSE | FALSE |
| ILMN_1874577 | LOC440117 | FALSE | FALSE |
| ILMN_1716546 | NA        | FALSE | FALSE |
| ILMN_2369785 | SNRPD2    | FALSE | TRUE  |
| ILMN_1686360 | ZNF124    | FALSE | FALSE |
| ILMN_3206475 | HMG1      | FALSE | FALSE |
| ILMN_1775962 | MCOLN3    | FALSE | TRUE  |
| ILMN_2375973 | ALKBH1    | FALSE | FALSE |
| ILMN_1749372 | GGT5      | FALSE | FALSE |
| ILMN_1744941 | TCOF1     | FALSE | FALSE |
| ILMN_1708095 | PANK2     | FALSE | FALSE |
| ILMN_2274180 | MKKS      | FALSE | FALSE |
| ILMN_3247462 | GLRX3     | FALSE | FALSE |
| ILMN_2315289 | PEX10     | FALSE | FALSE |
| ILMN_3236122 | NA        | FALSE | FALSE |
| ILMN_2381206 | DHODH     | FALSE | FALSE |
| ILMN_1747934 | ISYNA1    | FALSE | FALSE |
| ILMN_1689621 | RNF17     | FALSE | FALSE |
| ILMN_1812482 | NA        | FALSE | FALSE |
| ILMN_1805474 | C1orf131  | FALSE | FALSE |
| ILMN_1782983 | NA        | FALSE | FALSE |
| ILMN_2387553 | PSMA3     | FALSE | FALSE |

|              |           |       |       |
|--------------|-----------|-------|-------|
| ILMN_1903877 | NA        | FALSE | FALSE |
| ILMN_1672287 | MYNN      | FALSE | FALSE |
| ILMN_1748438 | POLR2G    | TRUE  | FALSE |
| ILMN_1774799 | NA        | FALSE | FALSE |
| ILMN_1652594 | ACTR5     | FALSE | TRUE  |
| ILMN_2081813 | PCSK1     | FALSE | FALSE |
| ILMN_2198376 | PSMA4     | FALSE | FALSE |
| ILMN_1765993 | DMBX1     | FALSE | FALSE |
| ILMN_1690520 | GOLGA2    | FALSE | FALSE |
| ILMN_3306944 | CASC2     | FALSE | FALSE |
| ILMN_1722995 | NA        | FALSE | FALSE |
| ILMN_1662438 | SOD1      | FALSE | FALSE |
| ILMN_1681193 | EPS8L1    | FALSE | FALSE |
| ILMN_1782429 | TMEM56    | FALSE | FALSE |
| ILMN_1696110 | TUBGCP3   | FALSE | FALSE |
| ILMN_2130514 | FAM76B    | FALSE | FALSE |
| ILMN_2318459 | TMEM8B    | FALSE | FALSE |
| ILMN_1738420 | TMEM201   | FALSE | TRUE  |
| ILMN_3236970 | LINC00667 | FALSE | FALSE |
| ILMN_1911968 | NA        | FALSE | FALSE |
| ILMN_2186715 | CENPH     | FALSE | FALSE |
| ILMN_3195401 | GABPB1    | FALSE | FALSE |
| ILMN_1749583 | ZNF777    | FALSE | FALSE |
| ILMN_2056760 | MKRN2     | FALSE | FALSE |
| ILMN_1749675 | WNT8B     | FALSE | FALSE |
| ILMN_2411658 | HPS1      | FALSE | FALSE |
| ILMN_1882284 | NA        | FALSE | FALSE |
| ILMN_2132082 | NA        | FALSE | FALSE |
| ILMN_1731688 | KLB       | FALSE | FALSE |
| ILMN_1698680 | ARL17A    | FALSE | TRUE  |
| ILMN_1656372 | PES1      | FALSE | FALSE |
| ILMN_3235969 | SNORA9    | FALSE | FALSE |
| ILMN_1724306 | CACNG1    | FALSE | FALSE |
| ILMN_1730795 | NA        | FALSE | FALSE |
| ILMN_2103024 | RBP5      | FALSE | FALSE |
| ILMN_1667830 | NA        | FALSE | FALSE |
| ILMN_1740263 | P2RX3     | FALSE | FALSE |
| ILMN_2189222 | KLHL8     | FALSE | FALSE |
| ILMN_1716468 | NUDT16P1  | FALSE | FALSE |
| ILMN_1658621 | NA        | FALSE | FALSE |
| ILMN_3191596 | NA        | FALSE | FALSE |
| ILMN_1676159 | STK26     | TRUE  | TRUE  |
| ILMN_1745501 | DNALI1    | FALSE | FALSE |
| ILMN_1693650 | FES       | FALSE | FALSE |
| ILMN_1875729 | LINC00111 | FALSE | FALSE |
| ILMN_1665423 | ZFP91     | FALSE | FALSE |



|              |              |       |       |
|--------------|--------------|-------|-------|
| ILMN_1755138 | NEK8         | FALSE | FALSE |
| ILMN_1746763 | ECM2         | FALSE | FALSE |
| ILMN_1753745 | HDDC2        | FALSE | FALSE |
| ILMN_1743095 | CCDC151      | FALSE | FALSE |
| ILMN_3244954 | TMEM194B     | FALSE | FALSE |
| ILMN_1682383 | NA           | FALSE | FALSE |
| ILMN_1716246 | FRZB         | FALSE | FALSE |
| ILMN_1716734 | CNOT7        | FALSE | FALSE |
| ILMN_3251418 | ARHGEF39     | FALSE | FALSE |
| ILMN_1733515 | LOXL3        | FALSE | FALSE |
| ILMN_1893010 | NA           | FALSE | FALSE |
| ILMN_1684875 | LOC100288637 | FALSE | FALSE |
| ILMN_2274605 | FRMPD2B      | FALSE | FALSE |
| ILMN_2336970 | MUTYH        | FALSE | FALSE |
| ILMN_1825660 | CCDC15       | FALSE | FALSE |
| ILMN_1680354 | NA           | FALSE | FALSE |
| ILMN_3190834 | ELMOD3       | FALSE | FALSE |
| ILMN_1717453 | NA           | FALSE | FALSE |
| ILMN_1680393 | SNORD55      | FALSE | FALSE |
| ILMN_3215374 | LOC257396    | FALSE | FALSE |
| ILMN_1654217 | MPP2         | FALSE | FALSE |
| ILMN_1774983 | IL17A        | FALSE | FALSE |
| ILMN_1666409 | PSMB6        | FALSE | FALSE |
| ILMN_1711599 | ZFP62        | FALSE | FALSE |
| ILMN_3308828 | MIR1253      | FALSE | FALSE |
| ILMN_1775944 | ABI2         | FALSE | FALSE |
| ILMN_1666179 | NA           | FALSE | FALSE |
| ILMN_1659536 | NA           | FALSE | FALSE |
| ILMN_1806683 | LCE4A        | FALSE | FALSE |
| ILMN_2082810 | BRD7         | FALSE | FALSE |
| ILMN_1798602 | PCF11        | FALSE | FALSE |
| ILMN_2226628 | ZNF184       | FALSE | FALSE |
| ILMN_1792960 | NA           | FALSE | FALSE |
| ILMN_1686454 | TIFA         | FALSE | FALSE |
| ILMN_1739368 | ZSCAN25      | FALSE | FALSE |
| ILMN_1751241 | TCOF1        | FALSE | FALSE |
| ILMN_1732329 | NA           | FALSE | FALSE |
| ILMN_1747172 | ZNF670       | FALSE | FALSE |
| ILMN_1771334 | EML5         | FALSE | FALSE |
| ILMN_1811598 | ADH1B        | FALSE | FALSE |
| ILMN_1671217 | RPS15        | FALSE | FALSE |
| ILMN_1722387 | SCAI         | FALSE | FALSE |
| ILMN_3239937 | NUDT16P1     | FALSE | FALSE |
| ILMN_1693886 | NA           | FALSE | FALSE |
| ILMN_1671209 | SYTL2        | FALSE | FALSE |
| ILMN_1682298 | ERMN         | FALSE | FALSE |

|              |              |       |       |
|--------------|--------------|-------|-------|
| ILMN_1723793 | PALB2        | FALSE | FALSE |
| ILMN_1701101 | NA           | FALSE | FALSE |
| ILMN_3211833 | CSPG4        | FALSE | FALSE |
| ILMN_1760683 | SRSF9        | FALSE | FALSE |
| ILMN_1739274 | PDHB         | FALSE | FALSE |
| ILMN_2224230 | NA           | FALSE | FALSE |
| ILMN_3211641 | NA           | FALSE | FALSE |
| ILMN_1671981 | NA           | FALSE | FALSE |
| ILMN_2171471 | SLC1A6       | FALSE | FALSE |
| ILMN_1689515 | CPLX3        | FALSE | FALSE |
| ILMN_2353732 | CD8A         | FALSE | FALSE |
| ILMN_1787540 | NA           | FALSE | FALSE |
| ILMN_1907847 | NA           | FALSE | FALSE |
| ILMN_1675788 | ZNF175       | FALSE | FALSE |
| ILMN_2323848 | PARD6A       | FALSE | FALSE |
| ILMN_1700408 | TRIM50       | FALSE | FALSE |
| ILMN_3215392 | LOC100131514 | FALSE | FALSE |
| ILMN_1670959 | CEACAM5      | FALSE | FALSE |
| ILMN_1815874 | NANS         | FALSE | FALSE |
| ILMN_1777905 | NA           | FALSE | FALSE |
| ILMN_1661788 | WNT5B        | FALSE | FALSE |
| ILMN_2314208 | S100BPB      | FALSE | FALSE |
| ILMN_1666631 | NA           | FALSE | FALSE |
| ILMN_1764795 | FMN2         | FALSE | FALSE |
| ILMN_3274380 | NA           | FALSE | FALSE |
| ILMN_1763333 | NA           | FALSE | FALSE |
| ILMN_1775345 | SRSF12       | FALSE | FALSE |
| ILMN_1815405 | NA           | FALSE | FALSE |
| ILMN_1785795 | METAP1       | FALSE | FALSE |
| ILMN_2296776 | PTPRA        | FALSE | FALSE |
| ILMN_1728802 | SDCCAG8      | FALSE | TRUE  |
| ILMN_3246845 | VPS35        | FALSE | FALSE |
| ILMN_1752646 | NA           | FALSE | FALSE |
| ILMN_1771000 | NA           | FALSE | FALSE |
| ILMN_1694774 | OR52J3       | FALSE | FALSE |
| ILMN_1690561 | GZMM         | FALSE | FALSE |
| ILMN_3180960 | NA           | FALSE | FALSE |
| ILMN_1789176 | PSMB1        | FALSE | FALSE |
| ILMN_1668069 | SMPD5        | FALSE | FALSE |
| ILMN_1671626 | DLGAP3       | FALSE | FALSE |
| ILMN_3243534 | NA           | FALSE | FALSE |
| ILMN_3235133 | MYO5B        | FALSE | FALSE |
| ILMN_3211047 | BASP1P1      | FALSE | FALSE |
| ILMN_1691334 | NME8         | FALSE | FALSE |
| ILMN_3235954 | NA           | FALSE | FALSE |
| ILMN_3296267 | NA           | FALSE | FALSE |

|              |           |       |       |
|--------------|-----------|-------|-------|
| ILMN_2086952 | NA        | FALSE | FALSE |
| ILMN_3237381 | TMEM217   | FALSE | FALSE |
| ILMN_1656383 | SOHLH1    | FALSE | FALSE |
| ILMN_1676907 | NA        | FALSE | FALSE |
| ILMN_1699091 | GPATCH2L  | FALSE | FALSE |
| ILMN_1676992 | NA        | FALSE | FALSE |
| ILMN_1704154 | TNFRSF19  | FALSE | FALSE |
| ILMN_1662792 | NA        | FALSE | FALSE |
| ILMN_1674541 | KIRREL3   | FALSE | FALSE |
| ILMN_1762529 | SLC12A8   | TRUE  | FALSE |
| ILMN_1784728 | NA        | FALSE | FALSE |
| ILMN_3240433 | GSTT2B    | FALSE | FALSE |
| ILMN_1764414 | SOS2      | FALSE | FALSE |
| ILMN_1871306 | NA        | FALSE | FALSE |
| ILMN_1742962 | CLEC6A    | TRUE  | FALSE |
| ILMN_3298671 | GUSBP10   | FALSE | FALSE |
| ILMN_1684377 | NA        | FALSE | FALSE |
| ILMN_1774823 | RPL34     | FALSE | FALSE |
| ILMN_1723732 | NA        | FALSE | FALSE |
| ILMN_1770460 | FOXR1     | FALSE | FALSE |
| ILMN_1694864 | NA        | FALSE | FALSE |
| ILMN_1759493 | NA        | FALSE | FALSE |
| ILMN_1740351 | IST1      | FALSE | FALSE |
| ILMN_3275012 | TUBB8     | FALSE | FALSE |
| ILMN_3289594 | NA        | FALSE | FALSE |
| ILMN_2308903 | WFDC3     | FALSE | FALSE |
| ILMN_1727241 | NA        | FALSE | FALSE |
| ILMN_1668646 | NA        | FALSE | FALSE |
| ILMN_3269108 | NA        | FALSE | FALSE |
| ILMN_1686562 | KIF13B    | FALSE | FALSE |
| ILMN_1910893 | NA        | FALSE | FALSE |
| ILMN_1786823 | ICAM2     | FALSE | FALSE |
| ILMN_1719149 | NA        | FALSE | FALSE |
| ILMN_1718636 | NA        | FALSE | FALSE |
| ILMN_1717494 | NA        | FALSE | FALSE |
| ILMN_1785592 | DUSP13    | FALSE | FALSE |
| ILMN_1755120 | MAN1A2    | FALSE | FALSE |
| ILMN_1859439 | NA        | FALSE | FALSE |
| ILMN_3240267 | LOC728323 | FALSE | FALSE |
| ILMN_1804895 | LSMEM1    | FALSE | FALSE |
| ILMN_1714118 | CD164L2   | FALSE | FALSE |
| ILMN_2185728 | SFRP4     | FALSE | FALSE |
| ILMN_1704598 | HYAL4     | FALSE | FALSE |
| ILMN_1798395 | PIGH      | FALSE | FALSE |
| ILMN_3225634 | NA        | FALSE | FALSE |
| ILMN_1870681 | NA        | FALSE | FALSE |

|              |           |       |       |
|--------------|-----------|-------|-------|
| ILMN_1760889 | CARF      | FALSE | FALSE |
| ILMN_1656266 | FLJ38379  | FALSE | FALSE |
| ILMN_3278835 | NA        | FALSE | FALSE |
| ILMN_1759732 | RFNG      | FALSE | FALSE |
| ILMN_1738759 | PIGT      | FALSE | TRUE  |
| ILMN_1663569 | FTCD      | FALSE | FALSE |
| ILMN_1678312 | ARL17A    | FALSE | FALSE |
| ILMN_1736655 | LCE1B     | FALSE | FALSE |
| ILMN_1712776 | KCNK7     | FALSE | FALSE |
| ILMN_1709725 | PAPL      | FALSE | FALSE |
| ILMN_3226045 | IST1      | FALSE | FALSE |
| ILMN_1719735 | NA        | FALSE | FALSE |
| ILMN_1742382 | RIMS3     | FALSE | FALSE |
| ILMN_3237665 | COX7A2L   | FALSE | FALSE |
| ILMN_1730416 | CYCS      | FALSE | FALSE |
| ILMN_1694535 | PDZK1     | FALSE | FALSE |
| ILMN_1727809 | STK35     | FALSE | FALSE |
| ILMN_1664960 | CEP170B   | FALSE | FALSE |
| ILMN_2257833 | BBS7      | FALSE | FALSE |
| ILMN_1728371 | LOC643201 | FALSE | FALSE |
| ILMN_1715301 | FXYD2     | FALSE | FALSE |
| ILMN_2274420 | SPTLC1    | FALSE | FALSE |
| ILMN_1738632 | PRKAR1A   | FALSE | FALSE |
| ILMN_3300353 | ISPD      | FALSE | FALSE |
| ILMN_2214355 | RAB30     | TRUE  | FALSE |
| ILMN_3235789 | NA        | FALSE | FALSE |
| ILMN_1755589 | DIP2B     | FALSE | FALSE |
| ILMN_1810727 | SLC25A45  | FALSE | FALSE |
| ILMN_2395496 | KLK7      | FALSE | FALSE |
| ILMN_1666191 | KLK13     | FALSE | FALSE |
| ILMN_2052686 | LCA5      | FALSE | FALSE |
| ILMN_3261594 | NA        | FALSE | FALSE |
| ILMN_1770245 | EPB41L5   | FALSE | FALSE |
| ILMN_1915629 | NA        | FALSE | FALSE |
| ILMN_1855510 | NA        | FALSE | FALSE |
| ILMN_2205050 | PRKX      | FALSE | FALSE |
| ILMN_1836309 | MCF2L-AS1 | FALSE | FALSE |
| ILMN_1671895 | ZNF613    | TRUE  | TRUE  |
| ILMN_3245204 | NA        | FALSE | FALSE |
| ILMN_1751793 | PCNXL2    | FALSE | FALSE |
| ILMN_1678080 | FKBP2     | FALSE | FALSE |
| ILMN_1693345 | CPEB1     | FALSE | FALSE |
| ILMN_2333440 | TM9SF1    | FALSE | FALSE |
| ILMN_1796281 | MYF5      | FALSE | FALSE |
| ILMN_1781980 | CFC1B     | FALSE | FALSE |
| ILMN_1665554 | BRF2      | TRUE  | FALSE |

|              |              |       |       |
|--------------|--------------|-------|-------|
| ILMN_1699525 | SRI          | FALSE | FALSE |
| ILMN_1776861 | HAP1         | FALSE | FALSE |
| ILMN_1685547 | ZXDB         | FALSE | FALSE |
| ILMN_1871488 | NA           | FALSE | FALSE |
| ILMN_1819223 | NA           | FALSE | FALSE |
| ILMN_1859942 | NA           | FALSE | FALSE |
| ILMN_1660111 | UCHL3        | FALSE | FALSE |
| ILMN_1876203 | NA           | FALSE | FALSE |
| ILMN_1788793 | KLF8         | FALSE | FALSE |
| ILMN_2166972 | BBS12        | FALSE | FALSE |
| ILMN_2215639 | TUBA3D       | FALSE | FALSE |
| ILMN_1782037 | IGSF3        | FALSE | FALSE |
| ILMN_1846282 | NA           | FALSE | FALSE |
| ILMN_1775822 | PDGFB        | FALSE | FALSE |
| ILMN_1899886 | NA           | FALSE | FALSE |
| ILMN_1782385 | POLR2A       | FALSE | FALSE |
| ILMN_3238772 | TAS2R30      | FALSE | FALSE |
| ILMN_1692077 | MXRA7        | FALSE | FALSE |
| ILMN_1733831 | PGBD5        | FALSE | FALSE |
| ILMN_1774844 | MAPKAPK2     | FALSE | FALSE |
| ILMN_1669553 | UBE2E3       | FALSE | FALSE |
| ILMN_1652602 | LMNTD2       | FALSE | FALSE |
| ILMN_1762100 | NA           | FALSE | FALSE |
| ILMN_2393763 | ARPC4        | FALSE | FALSE |
| ILMN_1910676 | NA           | FALSE | FALSE |
| ILMN_1723115 | CLEC4F       | FALSE | FALSE |
| ILMN_1774806 | SLC9A7       | FALSE | FALSE |
| ILMN_1655446 | XKR6         | FALSE | FALSE |
| ILMN_1675770 | SEC14L3      | FALSE | FALSE |
| ILMN_1698427 | TMUB2        | FALSE | FALSE |
| ILMN_3287814 | ST13         | FALSE | FALSE |
| ILMN_1655433 | BCKDHB       | FALSE | FALSE |
| ILMN_2356838 | CEPT1        | FALSE | FALSE |
| ILMN_1659000 | XPNPEP3      | FALSE | FALSE |
| ILMN_1660541 | NA           | FALSE | FALSE |
| ILMN_1769218 | NA           | FALSE | FALSE |
| ILMN_1711289 | GYS1         | FALSE | FALSE |
| ILMN_1807759 | TAS2R31      | FALSE | FALSE |
| ILMN_3263243 | LOC100128653 | FALSE | FALSE |
| ILMN_1798488 | GPR144       | FALSE | FALSE |
| ILMN_1908135 | NA           | FALSE | FALSE |
| ILMN_1655949 | NA           | FALSE | FALSE |
| ILMN_2398865 | VPS13C       | FALSE | FALSE |
| ILMN_1727592 | NA           | FALSE | FALSE |
| ILMN_3308315 | MIR1269A     | FALSE | FALSE |
| ILMN_2358628 | ADK          | FALSE | FALSE |

|              |           |       |       |
|--------------|-----------|-------|-------|
| ILMN_1652952 | RASAL2    | FALSE | FALSE |
| ILMN_2067813 | OR1L4     | FALSE | FALSE |
| ILMN_1744539 | NA        | FALSE | FALSE |
| ILMN_1711203 | C6orf15   | FALSE | FALSE |
| ILMN_1678075 | CDYL      | FALSE | FALSE |
| ILMN_1740549 | NA        | FALSE | FALSE |
| ILMN_1789790 | NA        | FALSE | FALSE |
| ILMN_1705874 | NA        | FALSE | FALSE |
| ILMN_2415170 | VPS8      | FALSE | FALSE |
| ILMN_3226214 | LOC728755 | FALSE | FALSE |
| ILMN_1749212 | NA        | TRUE  | FALSE |
| ILMN_1714252 | SLC16A13  | FALSE | FALSE |
| ILMN_1673896 | MAP3K13   | FALSE | FALSE |
| ILMN_2152402 | ABHD16A   | FALSE | FALSE |
| ILMN_1739128 | NA        | FALSE | FALSE |
| ILMN_1744299 | GPR110    | FALSE | FALSE |
| ILMN_1666852 | TRIM62    | FALSE | FALSE |
| ILMN_1795158 | FGR       | FALSE | FALSE |
| ILMN_2313672 | IL1RL1    | FALSE | FALSE |
| ILMN_1793433 | RAB10     | FALSE | FALSE |
| ILMN_1718514 | PSG6      | FALSE | FALSE |
| ILMN_1764022 | FXYD1     | FALSE | FALSE |
| ILMN_1815519 | EPN2      | FALSE | FALSE |
| ILMN_2157932 | FRMD8     | FALSE | FALSE |
| ILMN_1809708 | KCTD21    | FALSE | FALSE |
| ILMN_1699931 | HCST      | FALSE | FALSE |
| ILMN_1663263 | EPHA10    | FALSE | FALSE |
| ILMN_1810805 | HEATR5B   | FALSE | FALSE |
| ILMN_1755850 | ZNF350    | FALSE | TRUE  |
| ILMN_2134723 | OR7E91P   | FALSE | FALSE |
| ILMN_1769633 | CTSO      | FALSE | FALSE |
| ILMN_3310306 | MIR1224   | FALSE | FALSE |
| ILMN_2279961 | LAMP2     | FALSE | FALSE |
| ILMN_2094875 | NA        | FALSE | FALSE |
| ILMN_3260026 | HIGD1A    | FALSE | FALSE |
| ILMN_1665065 | SERINC3   | TRUE  | FALSE |
| ILMN_1745737 | DIS3L2    | FALSE | FALSE |
| ILMN_2129015 | AFF1      | FALSE | FALSE |
| ILMN_1782558 | XG        | FALSE | FALSE |
| ILMN_1696682 | ABLIM1    | FALSE | FALSE |
| ILMN_1729650 | PEX7      | FALSE | FALSE |
| ILMN_1765979 | VSIG10L   | FALSE | FALSE |
| ILMN_3310890 | MIR1206   | FALSE | FALSE |
| ILMN_1663281 | ZNF702P   | FALSE | FALSE |
| ILMN_1796113 | BCDIN3D   | FALSE | FALSE |
| ILMN_1709877 | TRIML1    | FALSE | FALSE |

|              |           |       |       |
|--------------|-----------|-------|-------|
| ILMN_2118129 | ITLN2     | FALSE | FALSE |
| ILMN_1702496 | STX17-AS1 | FALSE | FALSE |
| ILMN_1740185 | TPMT      | TRUE  | FALSE |
| ILMN_1759501 | TNFSF15   | FALSE | FALSE |
| ILMN_2075507 | MAN1A2    | FALSE | FALSE |
| ILMN_1694943 | CAST      | FALSE | FALSE |
| ILMN_1662950 | EPS8L1    | FALSE | FALSE |
| ILMN_1783060 | NA        | FALSE | FALSE |
| ILMN_1732767 | PSMD9     | FALSE | FALSE |
| ILMN_1795704 | KIAA0232  | TRUE  | FALSE |
| ILMN_1684266 | LIMD1-AS1 | FALSE | FALSE |
| ILMN_1703153 | GLYR1     | FALSE | FALSE |
| ILMN_1724324 | PLD3      | FALSE | FALSE |
| ILMN_1782015 | FCRLB     | FALSE | FALSE |
| ILMN_1752027 | UBE3B     | TRUE  | FALSE |
| ILMN_2409596 | RAB11FIP1 | FALSE | FALSE |
| ILMN_2047599 | TMEM50B   | FALSE | FALSE |
| ILMN_1654653 | KLC1      | FALSE | TRUE  |
| ILMN_1670757 | NA        | FALSE | FALSE |
| ILMN_1659761 | SNX29     | FALSE | FALSE |
| ILMN_1789642 | DNAJC5    | FALSE | TRUE  |
| ILMN_1760027 | WAS       | FALSE | FALSE |
| ILMN_1862217 | APH1B     | FALSE | FALSE |
| ILMN_1760335 | ADPRHL1   | FALSE | FALSE |
| ILMN_1770038 | LAMA1     | FALSE | FALSE |
| ILMN_1795835 | LINC00936 | FALSE | FALSE |
| ILMN_1720034 | PKHD1     | FALSE | FALSE |
| ILMN_2175474 | MTRF1L    | FALSE | FALSE |
| ILMN_1660856 | ALG11     | FALSE | FALSE |
| ILMN_1702787 | SEMA4A    | FALSE | FALSE |
| ILMN_1757847 | C11orf68  | FALSE | TRUE  |
| ILMN_1765355 | NOX1      | FALSE | FALSE |
| ILMN_2180315 | ATG4D     | FALSE | FALSE |
| ILMN_1653599 | ATP5D     | FALSE | TRUE  |
| ILMN_1796912 | ARHGEF7   | FALSE | FALSE |
| ILMN_1746232 | KITLG     | FALSE | FALSE |
| ILMN_1806713 | ZNF18     | FALSE | FALSE |
| ILMN_1750250 | ABCA12    | FALSE | FALSE |
| ILMN_1724581 | EDC3      | FALSE | FALSE |
| ILMN_1661611 | NA        | FALSE | FALSE |
| ILMN_3211677 | FGD5P1    | FALSE | FALSE |
| ILMN_1714741 | NA        | FALSE | TRUE  |
| ILMN_1793632 | TMEM222   | FALSE | FALSE |
| ILMN_1741389 | B3GNT8    | FALSE | FALSE |
| ILMN_3239263 | RPL23AP53 | FALSE | FALSE |
| ILMN_1700770 | PSKH1     | FALSE | FALSE |

|              |           |       |       |
|--------------|-----------|-------|-------|
| ILMN_2316278 | NA        | FALSE | FALSE |
| ILMN_1690352 | ADO       | TRUE  | FALSE |
| ILMN_2139989 | ACTBL2    | FALSE | FALSE |
| ILMN_3242176 | UBR3      | FALSE | FALSE |
| ILMN_1797021 | TMEM86A   | FALSE | FALSE |
| ILMN_1729851 | ODAM      | FALSE | FALSE |
| ILMN_1695717 | RBM41     | FALSE | FALSE |
| ILMN_1661138 | GON4L     | FALSE | FALSE |
| ILMN_3248122 | MED1      | FALSE | FALSE |
| ILMN_1733538 | RGS10     | FALSE | FALSE |
| ILMN_1791875 | NA        | FALSE | FALSE |
| ILMN_1660815 | CAB39L    | FALSE | FALSE |
| ILMN_3237627 | LOC154761 | FALSE | FALSE |
| ILMN_1691436 | BLVRA     | FALSE | TRUE  |
| ILMN_1792799 | NA        | FALSE | FALSE |
| ILMN_1683872 | NA        | FALSE | FALSE |
| ILMN_1756590 | SYS1      | FALSE | FALSE |
| ILMN_1802257 | PCTP      | FALSE | FALSE |
| ILMN_1709265 | RNF170    | FALSE | FALSE |
| ILMN_2102069 | SLC16A4   | FALSE | FALSE |
| ILMN_1763670 | TM2D1     | FALSE | FALSE |
| ILMN_1669064 | ZNF823    | FALSE | FALSE |
| ILMN_1915188 | MID2      | FALSE | FALSE |
| ILMN_1737949 | GALNS     | FALSE | FALSE |
| ILMN_2388955 | FAM212B   | FALSE | FALSE |
| ILMN_2228180 | MSRA      | FALSE | FALSE |
| ILMN_1778673 | GOLGA7    | FALSE | FALSE |
| ILMN_1753597 | FKRP      | FALSE | FALSE |
| ILMN_1793829 | TMCO1     | FALSE | FALSE |
| ILMN_1858668 | NA        | FALSE | FALSE |
| ILMN_2297315 | CDRT1     | FALSE | FALSE |
| ILMN_1738229 | NDRG3     | FALSE | TRUE  |
| ILMN_1721741 | NA        | TRUE  | FALSE |
| ILMN_1706758 | SEC24C    | TRUE  | FALSE |
| ILMN_1792014 | TMEM255B  | FALSE | FALSE |
| ILMN_1798472 | UBA6-AS1  | FALSE | FALSE |
| ILMN_1658689 | NA        | FALSE | FALSE |
| ILMN_1705114 | NUMB      | FALSE | FALSE |
| ILMN_1674758 | NA        | FALSE | FALSE |
| ILMN_3240829 | ZSCAN12P1 | FALSE | FALSE |
| ILMN_1743966 | BCL9L     | FALSE | FALSE |
| ILMN_1656706 | LCE2D     | FALSE | TRUE  |
| ILMN_3308245 | MIR524    | FALSE | FALSE |
| ILMN_2046730 | S100A10   | FALSE | FALSE |
| ILMN_1676194 | KRT17     | FALSE | FALSE |
| ILMN_1652490 | MANSC1    | FALSE | FALSE |



|              |           |       |       |
|--------------|-----------|-------|-------|
| ILMN_1652687 | TMEM198B  | FALSE | FALSE |
| ILMN_2203729 | HCG4      | FALSE | FALSE |
| ILMN_1670377 | NA        | TRUE  | TRUE  |
| ILMN_2372011 | SCAND1    | FALSE | TRUE  |
| ILMN_1751500 | ADAM15    | FALSE | FALSE |
| ILMN_1666022 | TNFRSF10D | FALSE | FALSE |
| ILMN_1787199 | NA        | TRUE  | FALSE |
| ILMN_1747285 | NA        | FALSE | FALSE |
| ILMN_1880387 | AAK1      | FALSE | FALSE |
| ILMN_1712312 | RAB11A    | FALSE | FALSE |
| ILMN_1917290 | LAMP2     | FALSE | FALSE |
| ILMN_1747347 | MILR1     | FALSE | FALSE |
| ILMN_2207419 | DDX26B    | FALSE | FALSE |
| ILMN_1776325 | UBE2Q1    | TRUE  | FALSE |
| ILMN_1685327 | NA        | FALSE | FALSE |
| ILMN_1795495 | NA        | FALSE | FALSE |
| ILMN_1813091 | ARL1      | FALSE | FALSE |
| ILMN_1800465 | NA        | FALSE | FALSE |
| ILMN_1790216 | NA        | FALSE | FALSE |
| ILMN_1680899 | NA        | FALSE | FALSE |
| ILMN_1666078 | HLA-H     | TRUE  | TRUE  |
| ILMN_1705892 | SH2D1A    | FALSE | FALSE |
| ILMN_2154115 | PSD4      | FALSE | FALSE |
| ILMN_3224939 | NA        | FALSE | FALSE |
| ILMN_2402806 | TRPC4AP   | TRUE  | TRUE  |
| ILMN_1732182 | FBXO44    | FALSE | FALSE |
| ILMN_1743582 | NUDT22    | FALSE | FALSE |
| ILMN_1786734 | EIF5      | FALSE | FALSE |
| ILMN_2163790 | NA        | TRUE  | FALSE |
| ILMN_1806705 | ASB6      | TRUE  | FALSE |
| ILMN_1653185 | PCSK7     | FALSE | FALSE |
| ILMN_2149935 | CC2D1B    | FALSE | FALSE |
| ILMN_3258356 | RPSAP52   | FALSE | FALSE |
| ILMN_2053829 | CBLN3     | FALSE | FALSE |
| ILMN_1799198 | OTUB2     | FALSE | FALSE |
| ILMN_1796180 | CRY2      | TRUE  | FALSE |
| ILMN_1776522 | SLC50A1   | FALSE | FALSE |
| ILMN_1754315 | MMAA      | FALSE | FALSE |
| ILMN_3246673 | SLC35G6   | FALSE | FALSE |
| ILMN_1773643 | SLC38A9   | FALSE | FALSE |
| ILMN_1795428 | WDR59     | FALSE | FALSE |
| ILMN_2368318 | FGR       | FALSE | FALSE |
| ILMN_1907100 | NA        | FALSE | FALSE |
| ILMN_1667086 | AP3M1     | FALSE | FALSE |
| ILMN_1754757 | SCNN1D    | FALSE | FALSE |
| ILMN_1752086 | TRAPPC11  | FALSE | FALSE |

|              |           |       |       |
|--------------|-----------|-------|-------|
| ILMN_1688515 | ZNF195    | FALSE | TRUE  |
| ILMN_1678805 | POMT2     | FALSE | FALSE |
| ILMN_1657129 | SKAP2     | FALSE | TRUE  |
| ILMN_1800082 | B3GNT3    | FALSE | FALSE |
| ILMN_1681631 | NA        | FALSE | FALSE |
| ILMN_1671005 | IRF2BP2   | FALSE | TRUE  |
| ILMN_2392370 | MYH14     | FALSE | TRUE  |
| ILMN_1669394 | EI24      | FALSE | FALSE |
| ILMN_1661424 | THAP6     | FALSE | FALSE |
| ILMN_1661519 | NA        | FALSE | FALSE |
| ILMN_1789909 | TBC1D9B   | FALSE | FALSE |
| ILMN_1713679 | MREG      | FALSE | FALSE |
| ILMN_1707077 | SORT1     | FALSE | FALSE |
| ILMN_3239950 | KHDC1L    | FALSE | FALSE |
| ILMN_1743427 | SCYL3     | FALSE | FALSE |
| ILMN_1694470 | FOXL2NB   | FALSE | FALSE |
| ILMN_1788347 | CIPC      | FALSE | FALSE |
| ILMN_1687375 | ATP2A2    | FALSE | FALSE |
| ILMN_1786606 | NA        | FALSE | FALSE |
| ILMN_1805225 | LPCAT3    | FALSE | FALSE |
| ILMN_1796075 | VPS41     | FALSE | FALSE |
| ILMN_1726387 | NF1       | FALSE | FALSE |
| ILMN_1765558 | NPAS2     | TRUE  | FALSE |
| ILMN_1781636 | VWA1      | FALSE | FALSE |
| ILMN_2298365 | PPP2R2B   | FALSE | FALSE |
| ILMN_1745702 | ACO2      | FALSE | FALSE |
| ILMN_1656537 | NA        | FALSE | FALSE |
| ILMN_2142752 | MANSC1    | FALSE | FALSE |
| ILMN_1805833 | FAM90A27P | FALSE | FALSE |
| ILMN_1783998 | STARD5    | FALSE | FALSE |
| ILMN_1655418 | CAPNS1    | FALSE | FALSE |
| ILMN_1825067 | NA        | FALSE | FALSE |
| ILMN_1741711 | DOPEY2    | FALSE | FALSE |
| ILMN_1651378 | AUP1      | FALSE | FALSE |
| ILMN_3234993 | ROMO1     | FALSE | FALSE |
| ILMN_1776925 | PRSS22    | FALSE | FALSE |
| ILMN_2394381 | CLN3      | FALSE | FALSE |
| ILMN_1726906 | AKT1S1    | FALSE | FALSE |
| ILMN_1673953 | HRH1      | FALSE | FALSE |
| ILMN_1807359 | CLEC11A   | FALSE | FALSE |
| ILMN_1675982 | GGA3      | FALSE | FALSE |
| ILMN_1756877 | IFT43     | FALSE | FALSE |
| ILMN_1752351 | LAMP2     | FALSE | FALSE |
| ILMN_2161746 | TRIP10    | FALSE | FALSE |
| ILMN_1651719 | MBTPS1    | FALSE | FALSE |
| ILMN_3257475 | EI24      | FALSE | FALSE |

|              |           |       |       |
|--------------|-----------|-------|-------|
| ILMN_1798346 | KIAA1468  | FALSE | FALSE |
| ILMN_1780898 | PRKCH     | FALSE | FALSE |
| ILMN_3258628 | INPP5K    | FALSE | FALSE |
| ILMN_1810467 | PPP2R1A   | FALSE | TRUE  |
| ILMN_2045994 | SEPW1     | TRUE  | TRUE  |
| ILMN_1684168 | GSTZ1     | FALSE | FALSE |
| ILMN_1662961 | GRHL3     | FALSE | FALSE |
| ILMN_1809695 | CAMK2G    | TRUE  | FALSE |
| ILMN_1812249 | C15orf54  | FALSE | FALSE |
| ILMN_1787378 | ADD3      | FALSE | FALSE |
| ILMN_3309699 | MIR29B1   | FALSE | FALSE |
| ILMN_1738821 | GOLGA2    | FALSE | FALSE |
| ILMN_2412807 | DCTN1     | FALSE | FALSE |
| ILMN_2189859 | TMEM192   | FALSE | FALSE |
| ILMN_1804938 | TPRA1     | FALSE | FALSE |
| ILMN_1679460 | PPFIBP1   | FALSE | FALSE |
| ILMN_1754114 | FLJ20021  | FALSE | FALSE |
| ILMN_1796106 | MGAT4B    | FALSE | FALSE |
| ILMN_1753819 | NA        | FALSE | FALSE |
| ILMN_2203463 | SPATS2    | FALSE | FALSE |
| ILMN_3242362 | LINC00950 | FALSE | FALSE |
| ILMN_1781987 | CDK5      | FALSE | FALSE |
| ILMN_1731248 | NA        | FALSE | FALSE |
| ILMN_1651819 | GALNT11   | FALSE | FALSE |
| ILMN_1656042 | KIAA0319L | FALSE | FALSE |
| ILMN_2225595 | ACAD8     | FALSE | FALSE |
| ILMN_2217601 | ANXA9     | FALSE | FALSE |
| ILMN_2271894 | ZNF654    | FALSE | FALSE |
| ILMN_1660837 | CLCN3     | FALSE | FALSE |
| ILMN_1689059 | ZNF329    | TRUE  | FALSE |
| ILMN_1787103 | NA        | FALSE | FALSE |
| ILMN_1808590 | GUCY1A3   | TRUE  | FALSE |
| ILMN_1693397 | PSG4      | FALSE | FALSE |
| ILMN_2096372 | ALDH1A1   | TRUE  | TRUE  |
| ILMN_1706118 | HN1L      | FALSE | FALSE |
| ILMN_1795666 | SNX24     | FALSE | FALSE |
| ILMN_1769751 | PIGG      | TRUE  | FALSE |
| ILMN_2225348 | ZNF805    | FALSE | FALSE |
| ILMN_1736863 | TMEM140   | TRUE  | FALSE |
| ILMN_1660629 | NBEAL2    | FALSE | FALSE |
| ILMN_1707308 | IKBKG     | FALSE | FALSE |
| ILMN_1687303 | ACAD10    | FALSE | FALSE |
| ILMN_1730054 | GSTT1     | FALSE | FALSE |
| ILMN_3238221 | FLJ42627  | FALSE | FALSE |
| ILMN_3244456 | NA        | FALSE | FALSE |
| ILMN_1783709 | RRAGA     | FALSE | FALSE |

|              |           |       |       |
|--------------|-----------|-------|-------|
| ILMN_3281627 | NA        | FALSE | FALSE |
| ILMN_2359601 | CAMK2G    | FALSE | FALSE |
| ILMN_1700549 | ERLIN2    | TRUE  | FALSE |
| ILMN_3242048 | NA        | FALSE | FALSE |
| ILMN_1795893 | TMEM167B  | TRUE  | FALSE |
| ILMN_1692276 | GGPS1     | FALSE | FALSE |
| ILMN_2133784 | PATE2     | FALSE | FALSE |
| ILMN_1692267 | B4GALT3   | FALSE | FALSE |
| ILMN_1814606 | GALNT2    | FALSE | FALSE |
| ILMN_1693233 | KIAA0513  | FALSE | FALSE |
| ILMN_2362122 | AP3M1     | FALSE | FALSE |
| ILMN_1793563 | DCTN1     | FALSE | FALSE |
| ILMN_1804798 | BEX4      | FALSE | FALSE |
| ILMN_1831098 | NA        | FALSE | FALSE |
| ILMN_1751969 | LOC440292 | FALSE | FALSE |
| ILMN_1661220 | TRIM16    | FALSE | FALSE |
| ILMN_1859843 | NA        | FALSE | FALSE |
| ILMN_3310080 | MIR614    | FALSE | FALSE |
| ILMN_1715698 | NA        | FALSE | FALSE |
| ILMN_1683660 | EIF3H     | FALSE | FALSE |
| ILMN_1719286 | CTSA      | FALSE | TRUE  |
| ILMN_1669281 | CLN3      | FALSE | FALSE |
| ILMN_1854861 | NA        | FALSE | FALSE |
| ILMN_1746031 | RIMS4     | FALSE | FALSE |
| ILMN_1651656 | PSG7      | FALSE | FALSE |
| ILMN_1810652 | LMBRD2    | FALSE | FALSE |
| ILMN_1698324 | AVPR2     | FALSE | FALSE |
| ILMN_2399140 | RAB5C     | FALSE | FALSE |
| ILMN_3255124 | ATL1      | FALSE | FALSE |
| ILMN_1764826 | TFE3      | FALSE | FALSE |
| ILMN_1685156 | ADCY6     | FALSE | FALSE |
| ILMN_1664698 | UNC119    | FALSE | FALSE |
| ILMN_1767811 | ZNF416    | FALSE | FALSE |
| ILMN_3248848 | MLF2      | FALSE | FALSE |
| ILMN_2409167 | ANXA2     | FALSE | FALSE |
| ILMN_1656393 | PPP2R3A   | FALSE | FALSE |
| ILMN_1743847 | ACAP3     | FALSE | FALSE |
| ILMN_1685709 | TMEM125   | FALSE | FALSE |
| ILMN_2251279 | WDR45     | FALSE | FALSE |
| ILMN_1785265 | PLS3      | FALSE | FALSE |
| ILMN_1805228 | LRG1      | FALSE | FALSE |
| ILMN_1716821 | GORASP1   | FALSE | TRUE  |
| ILMN_2355463 | CYFIP1    | FALSE | FALSE |
| ILMN_1790810 | HCN4      | FALSE | FALSE |
| ILMN_1711909 | EDEM2     | FALSE | TRUE  |
| ILMN_1682818 | NA        | TRUE  | FALSE |

|              |           |       |       |
|--------------|-----------|-------|-------|
| ILMN_2297864 | MTMR14    | FALSE | FALSE |
| ILMN_1739821 | EIF2S1    | FALSE | FALSE |
| ILMN_1803988 | MCL1      | FALSE | TRUE  |
| ILMN_1734880 | RPL23AP53 | FALSE | FALSE |
| ILMN_2399627 | AP1G1     | FALSE | FALSE |
| ILMN_1723542 | ZNF137P   | FALSE | FALSE |
| ILMN_1684368 | SMIM3     | FALSE | FALSE |
| ILMN_1673795 | HSD17B4   | FALSE | FALSE |
| ILMN_1689585 | C20orf194 | FALSE | FALSE |
| ILMN_1772702 | SRSF8     | TRUE  | FALSE |
| ILMN_1704621 | WDR44     | FALSE | FALSE |
| ILMN_1755504 | CALCOCO2  | FALSE | FALSE |
| ILMN_1793729 | C15orf39  | FALSE | FALSE |
| ILMN_2413259 | SOCS4     | FALSE | FALSE |
| ILMN_2144574 | CTBS      | FALSE | FALSE |
| ILMN_2377991 | ZSCAN31   | FALSE | FALSE |
| ILMN_1687971 | CAPN3     | TRUE  | FALSE |
| ILMN_1708303 | CYP4F22   | FALSE | FALSE |
| ILMN_1766045 | SH3GLB1   | FALSE | FALSE |
| ILMN_1795317 | NA        | FALSE | FALSE |
| ILMN_1743142 | CERS3     | FALSE | FALSE |
| ILMN_2362902 | RASSF5    | FALSE | FALSE |
| ILMN_1824192 | NA        | FALSE | FALSE |
| ILMN_1744822 | BECN1     | FALSE | FALSE |
| ILMN_1794038 | FAM49A    | FALSE | FALSE |
| ILMN_1738383 | EEF2      | FALSE | FALSE |
| ILMN_1759670 | AMACR     | FALSE | FALSE |
| ILMN_2331062 | CBFA2T2   | FALSE | FALSE |
| ILMN_1683300 | BAX       | FALSE | FALSE |
| ILMN_3249142 | ZG16      | FALSE | FALSE |
| ILMN_2397776 | ASB6      | FALSE | FALSE |
| ILMN_1655312 | HPS5      | FALSE | FALSE |
| ILMN_2119535 | RIPK1     | FALSE | FALSE |
| ILMN_1671748 | NA        | FALSE | FALSE |
| ILMN_3262542 | LINC01011 | FALSE | FALSE |
| ILMN_1708103 | NA        | FALSE | FALSE |
| ILMN_1904238 | NA        | FALSE | FALSE |
| ILMN_2128750 | PTTG1IP   | TRUE  | FALSE |
| ILMN_1735432 | ISCU      | FALSE | FALSE |
| ILMN_1696391 | LEPR      | FALSE | FALSE |
| ILMN_1789418 | NA        | FALSE | FALSE |
| ILMN_2404539 | TMEM230   | FALSE | FALSE |
| ILMN_1757427 | NA        | FALSE | FALSE |
| ILMN_2307455 | UBE2A     | FALSE | FALSE |
| ILMN_1741572 | AKAP8     | FALSE | FALSE |
| ILMN_3282321 | CDC42     | FALSE | FALSE |

|              |           |       |       |
|--------------|-----------|-------|-------|
| ILMN_1665887 | WDR61     | FALSE | FALSE |
| ILMN_1799996 | DHH       | FALSE | FALSE |
| ILMN_1772894 | TMEM27    | TRUE  | FALSE |
| ILMN_1779854 | CARD6     | FALSE | FALSE |
| ILMN_1760855 | OCRL      | FALSE | FALSE |
| ILMN_1898938 | NA        | FALSE | FALSE |
| ILMN_2370091 | NGFRAP1   | FALSE | FALSE |
| ILMN_3237507 | ATXN7L3B  | FALSE | FALSE |
| ILMN_1669352 | LY6G6C    | FALSE | FALSE |
| ILMN_1667519 | RRAS2     | FALSE | FALSE |
| ILMN_1686261 | TOM1L2    | FALSE | FALSE |
| ILMN_1735792 | RHBDF2    | FALSE | TRUE  |
| ILMN_3241524 | ZBTB22    | FALSE | FALSE |
| ILMN_2408683 | PPAP2B    | FALSE | FALSE |
| ILMN_1799289 | MRPL55    | FALSE | FALSE |
| ILMN_2363273 | ZNF226    | FALSE | TRUE  |
| ILMN_2399208 | SCAMP3    | FALSE | FALSE |
| ILMN_1771697 | VRK3      | FALSE | FALSE |
| ILMN_1739156 | DOPEY1    | FALSE | FALSE |
| ILMN_1682449 | ZNF518B   | TRUE  | FALSE |
| ILMN_2333865 | DNAJB12   | TRUE  | FALSE |
| ILMN_1713978 | SDF2      | FALSE | FALSE |
| ILMN_1705861 | AP1M2     | FALSE | FALSE |
| ILMN_2234016 | FTH1      | FALSE | FALSE |
| ILMN_3236774 | NA        | FALSE | FALSE |
| ILMN_1667319 | LPPR2     | TRUE  | FALSE |
| ILMN_1712755 | LRRC41    | FALSE | FALSE |
| ILMN_2343097 | NCALD     | FALSE | FALSE |
| ILMN_1915616 | NA        | FALSE | FALSE |
| ILMN_3242967 | NA        | FALSE | FALSE |
| ILMN_1744912 | CTTN      | FALSE | FALSE |
| ILMN_1657429 | SMAGP     | FALSE | FALSE |
| ILMN_1764609 | PWWP2B    | FALSE | FALSE |
| ILMN_1703041 | IDUA      | TRUE  | FALSE |
| ILMN_3253304 | BRI3      | FALSE | FALSE |
| ILMN_1683980 | PLEKHM2   | FALSE | FALSE |
| ILMN_1709227 | CCDC84    | FALSE | FALSE |
| ILMN_1768751 | MTA3      | FALSE | FALSE |
| ILMN_1916702 | LINC00672 | FALSE | FALSE |
| ILMN_1784286 | NDUFA1    | FALSE | FALSE |
| ILMN_2341548 | MYO5B     | FALSE | FALSE |
| ILMN_2366246 | SEC23B    | FALSE | FALSE |
| ILMN_1758542 | BMP1      | FALSE | FALSE |
| ILMN_1661888 | MEF2A     | FALSE | FALSE |
| ILMN_3225300 | DYNC112   | FALSE | TRUE  |
| ILMN_2199313 | NPDC1     | FALSE | FALSE |

|              |           |       |       |
|--------------|-----------|-------|-------|
| ILMN_1789233 | VPS37C    | FALSE | FALSE |
| ILMN_1761242 | COMMD1    | FALSE | FALSE |
| ILMN_3257030 | FTH1      | FALSE | FALSE |
| ILMN_1730568 | ZDHHC7    | FALSE | FALSE |
| ILMN_1757561 | MGC16025  | FALSE | FALSE |
| ILMN_1796458 | GABARAPL2 | FALSE | FALSE |
| ILMN_1691476 | MYLK      | TRUE  | FALSE |
| ILMN_1785060 | TSPAN14   | FALSE | FALSE |
| ILMN_1675674 | UBE4B     | FALSE | FALSE |
| ILMN_1756874 | FBXO42    | FALSE | FALSE |
| ILMN_2113340 | AIM1L     | FALSE | FALSE |
| ILMN_2201413 | SLC37A2   | FALSE | FALSE |
| ILMN_1756152 | MFSD11    | FALSE | FALSE |
| ILMN_1681812 | HIF1AN    | FALSE | FALSE |
| ILMN_1831826 | NA        | FALSE | FALSE |
| ILMN_2258363 | KLC4      | FALSE | FALSE |
| ILMN_1776119 | ABCC10    | FALSE | FALSE |
| ILMN_1740010 | PCNX      | FALSE | FALSE |
| ILMN_2163051 | NA        | FALSE | FALSE |
| ILMN_1777129 | CENPT     | FALSE | FALSE |
| ILMN_1781672 | GAB1      | FALSE | TRUE  |
| ILMN_3268717 | LOC146880 | FALSE | FALSE |
| ILMN_2364110 | GBA       | FALSE | FALSE |
| ILMN_1750563 | CERCAM    | FALSE | FALSE |
| ILMN_2204876 | FLVCR2    | FALSE | FALSE |
| ILMN_2391150 | FILIP1L   | FALSE | FALSE |
| ILMN_1774708 | ORMDL2    | FALSE | FALSE |
| ILMN_3245452 | FAM149B1  | FALSE | FALSE |
| ILMN_1688452 | LCMT1     | FALSE | FALSE |
| ILMN_1804328 | WWP1      | FALSE | FALSE |
| ILMN_1895334 | NA        | FALSE | FALSE |
| ILMN_1689989 | CDC42BPB  | FALSE | FALSE |
| ILMN_1801377 | SLC29A4   | FALSE | FALSE |
| ILMN_2339627 | COPE      | FALSE | FALSE |
| ILMN_1744932 | NA        | FALSE | FALSE |
| ILMN_1652533 | POM121L8P | FALSE | FALSE |
| ILMN_1802456 | DCTD      | FALSE | FALSE |
| ILMN_1651949 | SCYL3     | FALSE | FALSE |
| ILMN_1685365 | ZNF773    | FALSE | FALSE |
| ILMN_1654013 | HID1      | FALSE | FALSE |
| ILMN_1793854 | INTS1     | FALSE | FALSE |
| ILMN_1763265 | CHMP1B    | FALSE | FALSE |
| ILMN_1798061 | ZFYVE26   | FALSE | FALSE |
| ILMN_2345837 | CLTA      | FALSE | FALSE |
| ILMN_3236344 | BMS1P4    | FALSE | FALSE |
| ILMN_1788604 | WBP2      | FALSE | FALSE |

|              |           |       |       |
|--------------|-----------|-------|-------|
| ILMN_1668748 | MED15     | FALSE | FALSE |
| ILMN_1680388 | LINC00989 | FALSE | FALSE |
| ILMN_1670875 | PPM1D     | FALSE | FALSE |
| ILMN_1778951 | C6orf203  | FALSE | FALSE |
| ILMN_2111237 | MN1       | FALSE | FALSE |
| ILMN_1659437 | TXNDC17   | FALSE | FALSE |
| ILMN_1727135 | FIBCD1    | FALSE | FALSE |
| ILMN_2345564 | TGM5      | FALSE | FALSE |
| ILMN_1814856 | CACFD1    | FALSE | FALSE |
| ILMN_1765204 | ST13      | FALSE | FALSE |
| ILMN_1726666 | GPX3      | FALSE | FALSE |
| ILMN_2415011 | DCTD      | FALSE | FALSE |
| ILMN_1791222 | GLYCTK    | FALSE | FALSE |
| ILMN_2173294 | THNSL2    | FALSE | TRUE  |
| ILMN_3235216 | IFT20     | FALSE | FALSE |
| ILMN_1798129 | TRMT44    | FALSE | FALSE |
| ILMN_1679194 | UGT2B7    | FALSE | FALSE |
| ILMN_2181125 | NAPB      | TRUE  | FALSE |
| ILMN_1672526 | LOC389834 | FALSE | FALSE |
| ILMN_2331010 | TNFRSF10B | FALSE | FALSE |
| ILMN_1778803 | ZFAND6    | FALSE | TRUE  |
| ILMN_3307742 | CAPS2     | FALSE | FALSE |
| ILMN_1722809 | NRCAM     | FALSE | FALSE |
| ILMN_1697793 | SYNJ2BP   | FALSE | FALSE |
| ILMN_1657746 | BPHL      | FALSE | FALSE |
| ILMN_1706426 | DSTN      | FALSE | FALSE |
| ILMN_1737146 | TRAM1     | FALSE | FALSE |
| ILMN_1787885 | NUDT18    | FALSE | FALSE |
| ILMN_1752923 | IFNAR1    | FALSE | FALSE |
| ILMN_2402581 | NA        | FALSE | FALSE |
| ILMN_1697227 | NA        | FALSE | FALSE |
| ILMN_2390338 | UBE2E3    | FALSE | FALSE |
| ILMN_2106994 | RABIF     | FALSE | FALSE |
| ILMN_1669607 | PHKG2     | FALSE | FALSE |
| ILMN_1680054 | LAMB3     | FALSE | FALSE |
| ILMN_1691790 | DACT2     | FALSE | FALSE |
| ILMN_3236080 | FAM26E    | FALSE | FALSE |
| ILMN_2258004 | METRNL    | FALSE | FALSE |
| ILMN_2119692 | CSAD      | FALSE | FALSE |
| ILMN_3180557 | CYB561D1  | FALSE | TRUE  |
| ILMN_1765523 | TOLLIP    | TRUE  | FALSE |
| ILMN_2053536 | RHBDL2    | FALSE | FALSE |
| ILMN_2109536 | NA        | FALSE | FALSE |
| ILMN_2264029 | KLK5      | FALSE | FALSE |
| ILMN_3274339 | NA        | FALSE | FALSE |
| ILMN_1894388 | NA        | FALSE | FALSE |



|              |          |       |       |
|--------------|----------|-------|-------|
| ILMN_1680693 | ZNF419   | FALSE | FALSE |
| ILMN_2371251 | MPG      | FALSE | FALSE |
| ILMN_1671149 | MEG3     | FALSE | FALSE |
| ILMN_2405628 | TOP1MT   | FALSE | FALSE |
| ILMN_1803313 | NA       | FALSE | FALSE |
| ILMN_2103362 | ARHGAP27 | FALSE | FALSE |
| ILMN_1801941 | C1orf50  | FALSE | FALSE |
| ILMN_2392286 | IP6K1    | FALSE | FALSE |
| ILMN_2138589 | MERTK    | FALSE | FALSE |
| ILMN_1800871 | RAB6A    | FALSE | FALSE |
| ILMN_1678579 | CPT2     | FALSE | FALSE |
| ILMN_1746704 | TRIM8    | FALSE | FALSE |
| ILMN_3271587 | NA       | FALSE | FALSE |
| ILMN_2105966 | SLC35A4  | FALSE | FALSE |
| ILMN_1688702 | PJA2     | FALSE | FALSE |
| ILMN_1722329 | CASQ2    | FALSE | FALSE |
| ILMN_2396148 | HIP1R    | FALSE | FALSE |
| ILMN_1683231 | FAM83F   | FALSE | FALSE |
| ILMN_1726434 | UNC45A   | FALSE | FALSE |
| ILMN_1731433 | AOC1     | TRUE  | FALSE |
| ILMN_1757262 | ZBTB5    | FALSE | FALSE |
| ILMN_1662896 | WDR11    | FALSE | FALSE |
| ILMN_3188106 | CYTH2    | FALSE | FALSE |
| ILMN_1652762 | HIC2     | FALSE | FALSE |
| ILMN_1701457 | FAHD1    | FALSE | FALSE |
| ILMN_1769721 | SP6      | FALSE | FALSE |
| ILMN_1661594 | C2orf42  | FALSE | FALSE |
| ILMN_1711862 | RNF7     | FALSE | FALSE |
| ILMN_2064694 | STIM1    | FALSE | FALSE |
| ILMN_3240187 | EMC3     | FALSE | TRUE  |
| ILMN_2363127 | MROH8    | FALSE | FALSE |
| ILMN_1718171 | MED26    | FALSE | FALSE |
| ILMN_1671154 | TMPRSS13 | FALSE | FALSE |
| ILMN_1667594 | KLF10    | FALSE | TRUE  |
| ILMN_2406267 | MARVELD2 | FALSE | FALSE |
| ILMN_1657744 | FAM219B  | FALSE | FALSE |
| ILMN_1670652 | CYP2C9   | FALSE | FALSE |
| ILMN_2384181 | DHRS9    | FALSE | FALSE |
| ILMN_3263575 | NA       | FALSE | FALSE |
| ILMN_1687896 | PIK3C3   | FALSE | FALSE |
| ILMN_1658498 | SLC44A3  | FALSE | FALSE |
| ILMN_2388800 | PPAP2B   | FALSE | FALSE |
| ILMN_1705403 | CYP2S1   | TRUE  | FALSE |
| ILMN_1709348 | ALDH1A1  | FALSE | TRUE  |
| ILMN_1686929 | GPATCH3  | FALSE | FALSE |
| ILMN_1731014 | HEMK1    | FALSE | FALSE |

|              |           |       |       |
|--------------|-----------|-------|-------|
| ILMN_1753265 | C12orf76  | TRUE  | FALSE |
| ILMN_1698225 | MYO5A     | FALSE | FALSE |
| ILMN_3276016 | WWP1      | FALSE | FALSE |
| ILMN_1709809 | NHP2L1    | FALSE | FALSE |
| ILMN_1697200 | MON2      | FALSE | FALSE |
| ILMN_1678730 | NOMO1     | FALSE | FALSE |
| ILMN_1667429 | SLC25A20  | FALSE | FALSE |
| ILMN_3238375 | CENPT     | FALSE | FALSE |
| ILMN_2093231 | NA        | FALSE | FALSE |
| ILMN_1771832 | PARP6     | FALSE | FALSE |
| ILMN_1698072 | PITRM1    | FALSE | FALSE |
| ILMN_1909770 | NA        | FALSE | FALSE |
| ILMN_2096405 | WDR37     | FALSE | FALSE |
| ILMN_2198893 | LOC407835 | FALSE | FALSE |
| ILMN_2128623 | NA        | FALSE | FALSE |
| ILMN_1854015 | NA        | FALSE | FALSE |
| ILMN_3243972 | SNORA70B  | FALSE | FALSE |
| ILMN_1768480 | VGLL4     | FALSE | FALSE |
| ILMN_3201614 | NA        | FALSE | FALSE |
| ILMN_2187533 | CSRNP2    | FALSE | FALSE |
| ILMN_1734830 | MTHFR     | TRUE  | FALSE |
| ILMN_1735788 | TRIOBP    | FALSE | FALSE |
| ILMN_1723768 | NLRX1     | FALSE | FALSE |
| ILMN_1805104 | ABAT      | TRUE  | FALSE |
| ILMN_1792671 | C12orf29  | FALSE | FALSE |
| ILMN_1711766 | SKP1      | FALSE | FALSE |
| ILMN_1671728 | CARD14    | FALSE | FALSE |
| ILMN_1720771 | STX11     | FALSE | FALSE |
| ILMN_1668559 | RGS10     | FALSE | FALSE |
| ILMN_2330845 | NSF       | FALSE | FALSE |
| ILMN_3243414 | NA        | FALSE | FALSE |
| ILMN_1804908 | NA        | FALSE | FALSE |
| ILMN_1672356 | NA        | FALSE | FALSE |
| ILMN_1747146 | TSG101    | FALSE | FALSE |
| ILMN_2366714 | UQCR10    | FALSE | TRUE  |
| ILMN_1772329 | LRRFIP2   | FALSE | FALSE |
| ILMN_1792587 | VPS4B     | FALSE | FALSE |
| ILMN_1789732 | TMEM189   | TRUE  | FALSE |
| ILMN_2410262 | MTMR14    | FALSE | FALSE |
| ILMN_2413572 | MARK2     | FALSE | FALSE |
| ILMN_3293972 | NA        | FALSE | FALSE |
| ILMN_1796749 | KIF1C     | FALSE | FALSE |
| ILMN_2109994 | NA        | FALSE | FALSE |
| ILMN_3302919 | MYOF      | FALSE | FALSE |
| ILMN_1798838 | CTTN      | FALSE | FALSE |
| ILMN_1794659 | FUT2      | FALSE | FALSE |

|              |           |       |       |
|--------------|-----------|-------|-------|
| ILMN_1737517 | RPL29     | FALSE | FALSE |
| ILMN_1759023 | WFS1      | TRUE  | FALSE |
| ILMN_1706813 | SLC6A14   | FALSE | FALSE |
| ILMN_2374115 | TFAP2A    | FALSE | TRUE  |
| ILMN_1748803 | ZDHHC9    | FALSE | FALSE |
| ILMN_1657983 | TERF2IP   | TRUE  | FALSE |
| ILMN_1836469 | NA        | FALSE | FALSE |
| ILMN_1791069 | ZNF513    | FALSE | FALSE |
| ILMN_1869119 | NA        | FALSE | FALSE |
| ILMN_2289924 | TRAK1     | FALSE | FALSE |
| ILMN_1676689 | PPT2      | FALSE | FALSE |
| ILMN_2390227 | TBC1D9B   | FALSE | FALSE |
| ILMN_1661755 | FAM129B   | FALSE | FALSE |
| ILMN_1696702 | NEO1      | FALSE | FALSE |
| ILMN_1699852 | CES4A     | FALSE | FALSE |
| ILMN_1731180 | EXOC2     | FALSE | FALSE |
| ILMN_1728349 | TMEM63B   | FALSE | FALSE |
| ILMN_1907467 | NA        | FALSE | FALSE |
| ILMN_3247645 | LINC01420 | FALSE | FALSE |
| ILMN_1713990 | TRIP6     | FALSE | FALSE |
| ILMN_1768577 | PCSK6     | FALSE | FALSE |
| ILMN_3236599 | LINC00452 | FALSE | FALSE |
| ILMN_1774828 | VEZT      | FALSE | FALSE |
| ILMN_2367671 | LIMK2     | FALSE | FALSE |
| ILMN_1789243 | VPS33B    | FALSE | FALSE |
| ILMN_1751492 | NA        | FALSE | FALSE |
| ILMN_1773407 | C16orf72  | FALSE | FALSE |
| ILMN_2389376 | DCAF11    | FALSE | FALSE |
| ILMN_2379226 | CCNL2     | FALSE | FALSE |
| ILMN_3310730 | MIR1277   | FALSE | FALSE |
| ILMN_2372398 | ALDH5A1   | FALSE | FALSE |
| ILMN_2152502 | MGC72080  | FALSE | FALSE |
| ILMN_1813139 | ANKDD1A   | FALSE | FALSE |
| ILMN_1739847 | EIF3D     | FALSE | FALSE |
| ILMN_1796663 | B4GALNT4  | FALSE | FALSE |
| ILMN_3239378 | TADA2B    | FALSE | FALSE |
| ILMN_1693039 | ZFPL1     | FALSE | FALSE |
| ILMN_1712236 | PPP1R3B   | FALSE | FALSE |
| ILMN_2100815 | TMEM9B    | FALSE | FALSE |
| ILMN_1743621 | CRHR1-IT1 | FALSE | FALSE |
| ILMN_2187487 | HEATR5B   | FALSE | FALSE |
| ILMN_1875510 | NA        | FALSE | FALSE |
| ILMN_1739882 | SDR9C7    | FALSE | FALSE |
| ILMN_1661733 | FOLR1     | FALSE | FALSE |
| ILMN_3271092 | PPP1R21   | FALSE | FALSE |
| ILMN_1728698 | GDE1      | FALSE | FALSE |

|              |          |       |       |
|--------------|----------|-------|-------|
| ILMN_1724666 | NA       | FALSE | FALSE |
| ILMN_1657483 | SEC23B   | FALSE | FALSE |
| ILMN_1792182 | RDH12    | FALSE | FALSE |
| ILMN_1749009 | REXO2    | FALSE | FALSE |
| ILMN_2336186 | LCMT1    | FALSE | FALSE |
| ILMN_1813423 | NAA60    | FALSE | FALSE |
| ILMN_3293146 | TMEM230  | FALSE | FALSE |
| ILMN_1692260 | MAFG     | FALSE | FALSE |
| ILMN_1770030 | C7orf43  | FALSE | FALSE |
| ILMN_1776953 | MYL9     | FALSE | FALSE |
| ILMN_1756006 | ATG2A    | FALSE | FALSE |
| ILMN_1663173 | STAG3L2  | FALSE | FALSE |
| ILMN_1675684 | APOBEC3C | FALSE | FALSE |
| ILMN_1658773 | PIGF     | FALSE | FALSE |
| ILMN_1807600 | NPLOC4   | FALSE | FALSE |
| ILMN_1771051 | RPL29    | FALSE | FALSE |
| ILMN_2192385 | TTC19    | FALSE | FALSE |
| ILMN_1868866 | NA       | FALSE | FALSE |
| ILMN_1785919 | NA       | FALSE | FALSE |
| ILMN_1727393 | NA       | FALSE | FALSE |
| ILMN_1735553 | MAP3K9   | FALSE | FALSE |
| ILMN_3209180 | NA       | FALSE | FALSE |
| ILMN_1685005 | TNFRSF1A | TRUE  | FALSE |
| ILMN_1676005 | KPNA1    | FALSE | FALSE |
| ILMN_1774427 | CALCOCO1 | TRUE  | FALSE |
| ILMN_1764500 | BRK1     | FALSE | FALSE |
| ILMN_1683916 | PEX13    | FALSE | TRUE  |
| ILMN_1679809 | GSTP1    | FALSE | FALSE |
| ILMN_1655876 | TMEM159  | TRUE  | FALSE |
| ILMN_1796712 | S100A10  | FALSE | FALSE |
| ILMN_2190414 | ZNF83    | FALSE | FALSE |
| ILMN_1668514 | PIP5K1C  | FALSE | FALSE |
| ILMN_1756525 | KLHL20   | FALSE | FALSE |
| ILMN_1753439 | RPTN     | FALSE | FALSE |
| ILMN_1704253 | C6orf106 | TRUE  | FALSE |
| ILMN_1803624 | TMEM147  | FALSE | FALSE |
| ILMN_1720430 | PPDPF    | FALSE | FALSE |
| ILMN_1788118 | SLC23A3  | FALSE | FALSE |
| ILMN_2124386 | RGL2     | FALSE | FALSE |
| ILMN_1697559 | G6PD     | FALSE | FALSE |
| ILMN_1703593 | BAIAP2L1 | FALSE | FALSE |
| ILMN_1832425 | NA       | FALSE | FALSE |
| ILMN_1343295 | GAPDH    | FALSE | FALSE |
| ILMN_1776188 | MAP1LC3A | FALSE | FALSE |
| ILMN_3236858 | NYNRIN   | TRUE  | FALSE |
| ILMN_2332795 | ZNF16    | FALSE | FALSE |

|              |           |       |       |
|--------------|-----------|-------|-------|
| ILMN_1781431 | GLCCI1    | FALSE | FALSE |
| ILMN_2379718 | RAB24     | FALSE | FALSE |
| ILMN_1651826 | BASP1     | FALSE | FALSE |
| ILMN_2352009 | ACADVL    | FALSE | FALSE |
| ILMN_1651254 | LPP       | FALSE | FALSE |
| ILMN_1686082 | C14orf79  | FALSE | FALSE |
| ILMN_1909073 | NA        | FALSE | FALSE |
| ILMN_1784863 | CD36      | FALSE | FALSE |
| ILMN_1767992 | SLC12A6   | FALSE | FALSE |
| ILMN_1727815 | CFI       | FALSE | FALSE |
| ILMN_1803256 | STOX2     | FALSE | FALSE |
| ILMN_1808356 | FAM3A     | FALSE | FALSE |
| ILMN_2347805 | EXOC1     | FALSE | FALSE |
| ILMN_1677919 | GMPR2     | FALSE | TRUE  |
| ILMN_1804148 | TMED4     | FALSE | FALSE |
| ILMN_1651967 | TP53I3    | FALSE | FALSE |
| ILMN_1750805 | ARHGAP30  | FALSE | FALSE |
| ILMN_2153373 | LRBA      | FALSE | FALSE |
| ILMN_1755897 | UGT2B7    | FALSE | FALSE |
| ILMN_2349071 | GPR64     | FALSE | FALSE |
| ILMN_1748983 | RTN4      | FALSE | FALSE |
| ILMN_1793743 | DIRC2     | FALSE | TRUE  |
| ILMN_1745655 | PEX16     | FALSE | FALSE |
| ILMN_1671809 | DUSP22    | TRUE  | FALSE |
| ILMN_1717809 | RNF24     | TRUE  | TRUE  |
| ILMN_1739792 | RHOG      | FALSE | FALSE |
| ILMN_3213098 | NA        | FALSE | FALSE |
| ILMN_1773561 | RAP2C     | FALSE | FALSE |
| ILMN_1732873 | IPPK      | FALSE | FALSE |
| ILMN_3244516 | HECTD4    | FALSE | FALSE |
| ILMN_1702430 | SOX30     | FALSE | FALSE |
| ILMN_1752197 | PDDC1     | FALSE | FALSE |
| ILMN_1679178 | ATP5D     | FALSE | FALSE |
| ILMN_1722218 | MBOAT7    | FALSE | TRUE  |
| ILMN_1754658 | NA        | FALSE | FALSE |
| ILMN_1768271 | SMAP1     | FALSE | FALSE |
| ILMN_1784967 | EPB41L4B  | FALSE | FALSE |
| ILMN_2206126 | RAET1L    | FALSE | FALSE |
| ILMN_1679614 | SGSM3     | FALSE | FALSE |
| ILMN_1744006 | GFOD2     | FALSE | FALSE |
| ILMN_1751345 | AP1S1     | FALSE | FALSE |
| ILMN_2317730 | ELMO2     | TRUE  | TRUE  |
| ILMN_1762718 | CMTM4     | FALSE | FALSE |
| ILMN_1913021 | NA        | FALSE | FALSE |
| ILMN_3206429 | CTBP2     | FALSE | FALSE |
| ILMN_3243351 | LOC646214 | FALSE | FALSE |

|              |           |       |       |
|--------------|-----------|-------|-------|
| ILMN_1807423 | IGF2BP3   | FALSE | FALSE |
| ILMN_1694514 | ZDHC1     | TRUE  | FALSE |
| ILMN_1669747 | UNC13B    | FALSE | FALSE |
| ILMN_2133090 | SDR9C7    | FALSE | FALSE |
| ILMN_2404182 | DUOX1     | TRUE  | FALSE |
| ILMN_1716524 | RAB7A     | TRUE  | FALSE |
| ILMN_1745112 | FAM102A   | FALSE | FALSE |
| ILMN_1713402 | FAM160A2  | FALSE | FALSE |
| ILMN_1692121 | USO1      | FALSE | FALSE |
| ILMN_1803953 | LINC00493 | FALSE | FALSE |
| ILMN_1679232 | KIDINS220 | FALSE | FALSE |
| ILMN_1763640 | NCKAP5L   | FALSE | FALSE |
| ILMN_1773847 | DYNC112   | FALSE | FALSE |
| ILMN_1810431 | NA        | FALSE | FALSE |
| ILMN_3282436 | EIF3F     | TRUE  | FALSE |
| ILMN_1801632 | KRT5      | FALSE | FALSE |
| ILMN_1813491 | SPTLC1    | FALSE | FALSE |
| ILMN_2353143 | FBLIM1    | FALSE | FALSE |
| ILMN_1713174 | TCP11L1   | FALSE | FALSE |
| ILMN_1799604 | OCIAD1    | TRUE  | FALSE |
| ILMN_1798254 | ACTR10    | FALSE | FALSE |
| ILMN_1680353 | NSF       | FALSE | FALSE |
| ILMN_2383975 | PRDX5     | FALSE | FALSE |
| ILMN_1826531 | ATXN7L3B  | FALSE | FALSE |
| ILMN_1841620 | NA        | FALSE | FALSE |
| ILMN_1672728 | KCTD5     | FALSE | FALSE |
| ILMN_3307944 | PHLDB3    | FALSE | FALSE |
| ILMN_2225537 | PTGR1     | FALSE | FALSE |
| ILMN_1789419 | EXOC3     | FALSE | FALSE |
| ILMN_1775114 | ENTPD3    | TRUE  | FALSE |
| ILMN_1679838 | WBP5      | FALSE | FALSE |
| ILMN_1711166 | WRAP73    | FALSE | FALSE |
| ILMN_1745784 | ZNF324    | FALSE | TRUE  |
| ILMN_1706434 | YBX3P1    | FALSE | FALSE |
| ILMN_1727332 | ATPIF1    | FALSE | FALSE |
| ILMN_1793203 | MIEF1     | FALSE | TRUE  |
| ILMN_1724946 | SPINT1    | FALSE | FALSE |
| ILMN_1680687 | NSF       | FALSE | FALSE |
| ILMN_1803219 | TMC4      | FALSE | FALSE |
| ILMN_2326273 | CHI3L2    | FALSE | FALSE |
| ILMN_1794588 | DYRK2     | FALSE | FALSE |
| ILMN_1708340 | DAPK1     | FALSE | FALSE |
| ILMN_3187357 | NA        | FALSE | FALSE |
| ILMN_1743476 | LOC729609 | FALSE | FALSE |
| ILMN_1739199 | WASH3P    | TRUE  | FALSE |
| ILMN_1757370 | SMPD1     | FALSE | FALSE |

|              |              |       |       |
|--------------|--------------|-------|-------|
| ILMN_1789702 | GBE1         | FALSE | FALSE |
| ILMN_1773153 | SHC1         | FALSE | FALSE |
| ILMN_1756238 | TMEM217      | FALSE | FALSE |
| ILMN_1672940 | ZNF562       | FALSE | FALSE |
| ILMN_1678477 | C9orf85      | FALSE | FALSE |
| ILMN_1769027 | CDC42SE1     | FALSE | FALSE |
| ILMN_1758963 | NADK         | FALSE | FALSE |
| ILMN_1693341 | NA           | FALSE | TRUE  |
| ILMN_2230566 | RAB40B       | FALSE | FALSE |
| ILMN_3236239 | LOC100129550 | TRUE  | TRUE  |
| ILMN_1677314 | MUC1         | FALSE | FALSE |
| ILMN_1725534 | ACTN4        | FALSE | FALSE |
| ILMN_2319588 | OSGIN1       | FALSE | FALSE |
| ILMN_1892638 | NA           | FALSE | FALSE |
| ILMN_1678546 | PEX11B       | TRUE  | FALSE |
| ILMN_2140389 | TMEM185A     | FALSE | FALSE |
| ILMN_2403946 | FEZ2         | FALSE | FALSE |
| ILMN_1801852 | SEC61B       | FALSE | FALSE |
| ILMN_1676358 | RALB         | FALSE | FALSE |
| ILMN_1788961 | PPP2R2A      | FALSE | FALSE |
| ILMN_2095133 | SPTAN1       | TRUE  | TRUE  |
| ILMN_3235723 | TMPRSS11E    | FALSE | FALSE |
| ILMN_1718866 | C5orf46      | FALSE | FALSE |
| ILMN_1707336 | ARPC4        | FALSE | FALSE |
| ILMN_2122420 | HMGCL        | FALSE | FALSE |
| ILMN_2318638 | TGIF1        | FALSE | TRUE  |
| ILMN_1679693 | TMEM87B      | FALSE | FALSE |
| ILMN_1700159 | NIPSNAP3A    | FALSE | FALSE |
| ILMN_2384561 | TJP2         | FALSE | FALSE |
| ILMN_1734229 | SPPL2A       | FALSE | FALSE |
| ILMN_1808202 | R3HDM4       | FALSE | FALSE |
| ILMN_3240962 | DDRGK1       | FALSE | TRUE  |
| ILMN_1789751 | MFS1         | FALSE | FALSE |
| ILMN_1679600 | ACOT8        | FALSE | FALSE |
| ILMN_1700660 | RNF135       | FALSE | FALSE |
| ILMN_1738642 | CMPK1        | FALSE | FALSE |
| ILMN_3273340 | AGAP2-AS1    | FALSE | FALSE |
| ILMN_1780268 | C1orf56      | FALSE | FALSE |
| ILMN_1751984 | PRKAG1       | TRUE  | FALSE |
| ILMN_2321292 | WIPI2        | FALSE | FALSE |
| ILMN_1763386 | BID          | FALSE | FALSE |
| ILMN_1741942 | STX16        | TRUE  | TRUE  |
| ILMN_1675055 | MUL1         | FALSE | TRUE  |
| ILMN_3244963 | DCAF8        | FALSE | FALSE |
| ILMN_2354381 | PON2         | FALSE | FALSE |
| ILMN_1808095 | RNF41        | FALSE | FALSE |

|              |          |       |       |
|--------------|----------|-------|-------|
| ILMN_1719344 | NRBF2    | TRUE  | FALSE |
| ILMN_1658351 | FIS1     | FALSE | FALSE |
| ILMN_1811195 | ZNF211   | TRUE  | TRUE  |
| ILMN_1900110 | NA       | FALSE | FALSE |
| ILMN_1786843 | KCTD13   | FALSE | FALSE |
| ILMN_1746135 | PHF23    | FALSE | FALSE |
| ILMN_1815812 | CDIP1    | FALSE | FALSE |
| ILMN_1684440 | PXN      | FALSE | FALSE |
| ILMN_1769934 | GRHL1    | FALSE | FALSE |
| ILMN_1753805 | PRKD2    | FALSE | FALSE |
| ILMN_1739586 | FEZ2     | FALSE | FALSE |
| ILMN_1743187 | C6orf120 | FALSE | FALSE |
| ILMN_1660341 | LRPAP1   | TRUE  | TRUE  |
| ILMN_1712721 | GAST     | FALSE | FALSE |
| ILMN_1759915 | ARPC1A   | FALSE | FALSE |
| ILMN_3251317 | RER1     | FALSE | FALSE |
| ILMN_1703866 | SUPT5H   | FALSE | FALSE |
| ILMN_1711124 | NA       | FALSE | FALSE |
| ILMN_1685012 | EAF1     | FALSE | FALSE |
| ILMN_1723847 | CILP     | FALSE | FALSE |
| ILMN_1679277 | CMTM3    | FALSE | FALSE |
| ILMN_1690826 | TNKS1BP1 | FALSE | FALSE |
| ILMN_3253126 | GAS6-AS1 | FALSE | FALSE |
| ILMN_1763491 | CKMT1B   | FALSE | FALSE |
| ILMN_1775327 | PKM      | FALSE | FALSE |
| ILMN_3301749 | SPNS2    | FALSE | FALSE |
| ILMN_2055634 | TIAF1    | FALSE | FALSE |
| ILMN_1654441 | OAT      | FALSE | FALSE |
| ILMN_1782389 | LAD1     | FALSE | FALSE |
| ILMN_2233050 | PLA2G2D  | FALSE | FALSE |
| ILMN_1656621 | CHMP2A   | FALSE | FALSE |
| ILMN_2056032 | CD99     | FALSE | FALSE |
| ILMN_1656656 | COX19    | FALSE | FALSE |
| ILMN_1667432 | HYAL3    | FALSE | FALSE |
| ILMN_3252665 | C6orf132 | FALSE | FALSE |
| ILMN_2230902 | CTNNA1   | FALSE | FALSE |
| ILMN_1689306 | TMC7     | FALSE | FALSE |
| ILMN_1781745 | C9orf152 | FALSE | FALSE |
| ILMN_1697880 | PLD2     | FALSE | FALSE |
| ILMN_1800733 | MANBA    | FALSE | FALSE |
| ILMN_1736700 | ALDOA    | FALSE | FALSE |
| ILMN_2059535 | PPM1F    | FALSE | FALSE |
| ILMN_1752582 | RAB5B    | FALSE | FALSE |
| ILMN_2358382 | ZFYVE1   | FALSE | FALSE |
| ILMN_1675354 | NA       | FALSE | FALSE |
| ILMN_1722294 | CPNE8    | FALSE | TRUE  |



|              |           |       |       |
|--------------|-----------|-------|-------|
| ILMN_3308728 | MIR635    | FALSE | FALSE |
| ILMN_1679051 | PTPRR     | FALSE | FALSE |
| ILMN_1697971 | TRIM38    | FALSE | FALSE |
| ILMN_2173004 | RAB8B     | FALSE | FALSE |
| ILMN_1739751 | SLC26A11  | FALSE | FALSE |
| ILMN_1683827 | NA        | FALSE | FALSE |
| ILMN_1774265 | C2orf82   | FALSE | FALSE |
| ILMN_1684051 | WASF2     | FALSE | FALSE |
| ILMN_1797367 | TSC1      | TRUE  | FALSE |
| ILMN_1695962 | SLC12A9   | TRUE  | FALSE |
| ILMN_1870457 | NA        | FALSE | FALSE |
| ILMN_1854349 | NA        | FALSE | FALSE |
| ILMN_1703288 | TMEM259   | FALSE | FALSE |
| ILMN_1661537 | LEPROT    | FALSE | FALSE |
| ILMN_3251269 | SRP14     | FALSE | FALSE |
| ILMN_1728965 | C11orf57  | FALSE | FALSE |
| ILMN_1875342 | NA        | TRUE  | FALSE |
| ILMN_1889229 | NA        | FALSE | FALSE |
| ILMN_2112524 | RNF149    | FALSE | FALSE |
| ILMN_1760718 | ZMIZ2     | FALSE | FALSE |
| ILMN_1807596 | UBAP1     | FALSE | FALSE |
| ILMN_2068747 | OAT       | FALSE | FALSE |
| ILMN_1663618 | STAT3     | FALSE | FALSE |
| ILMN_1726169 | EDF1      | FALSE | FALSE |
| ILMN_1714352 | DMWD      | TRUE  | TRUE  |
| ILMN_2064655 | CXorf40A  | FALSE | FALSE |
| ILMN_2046896 | ESRRA     | FALSE | FALSE |
| ILMN_2206344 | NDST2     | TRUE  | FALSE |
| ILMN_2393254 | CAPNS1    | FALSE | FALSE |
| ILMN_1763127 | ACKR2     | FALSE | FALSE |
| ILMN_1699112 | COPB1     | FALSE | FALSE |
| ILMN_2068991 | NA        | FALSE | FALSE |
| ILMN_2226304 | ANKRD50   | TRUE  | FALSE |
| ILMN_2311779 | TMUB2     | FALSE | FALSE |
| ILMN_1742618 | XAF1      | FALSE | FALSE |
| ILMN_3283141 | LOC643802 | FALSE | FALSE |
| ILMN_1769259 | ANO9      | FALSE | FALSE |
| ILMN_1789575 | GJB3      | FALSE | TRUE  |
| ILMN_1733970 | BAG1      | FALSE | FALSE |
| ILMN_1682783 | TUG1      | FALSE | FALSE |
| ILMN_3296181 | NA        | FALSE | FALSE |
| ILMN_1808584 | COX20     | FALSE | FALSE |
| ILMN_2399392 | SIL1      | FALSE | FALSE |
| ILMN_1803819 | IQGAP1    | FALSE | TRUE  |
| ILMN_1701455 | FBXO6     | FALSE | FALSE |
| ILMN_1685095 | BLOC1S4   | FALSE | FALSE |

|              |            |       |       |
|--------------|------------|-------|-------|
| ILMN_1686623 | CSF1R      | FALSE | FALSE |
| ILMN_1687626 | ZDHHC24    | FALSE | FALSE |
| ILMN_1750158 | ACOX1      | FALSE | FALSE |
| ILMN_1710954 | FBXL19-AS1 | FALSE | FALSE |
| ILMN_1674394 | APMAP      | FALSE | TRUE  |
| ILMN_1809099 | IL33       | FALSE | FALSE |
| ILMN_1672461 | SPPL2B     | FALSE | FALSE |
| ILMN_2339779 | ATP6V1E1   | FALSE | FALSE |
| ILMN_1766261 | SLC2A12    | FALSE | FALSE |
| ILMN_1826471 | NA         | FALSE | FALSE |
| ILMN_1696021 | KPNA6      | FALSE | FALSE |
| ILMN_2124082 | PPP2R5B    | FALSE | FALSE |
| ILMN_1759460 | TAF7       | FALSE | FALSE |
| ILMN_3247256 | RPL7L1     | FALSE | FALSE |
| ILMN_1661173 | TRIP4      | FALSE | FALSE |
| ILMN_1758895 | CTSK       | TRUE  | FALSE |
| ILMN_1746948 | MYL5       | TRUE  | FALSE |
| ILMN_1706015 | FAM43A     | TRUE  | FALSE |
| ILMN_1729208 | NGFRAP1    | FALSE | FALSE |
| ILMN_1801040 | SPN        | FALSE | FALSE |
| ILMN_1773742 | DNAJB9     | FALSE | FALSE |
| ILMN_2377019 | CORO1B     | FALSE | FALSE |
| ILMN_2119224 | KIFAP3     | FALSE | FALSE |
| ILMN_1815130 | MICALL1    | FALSE | FALSE |
| ILMN_1663160 | ZNF337     | FALSE | FALSE |
| ILMN_1802252 | GAPDH      | FALSE | FALSE |
| ILMN_1757646 | UFM1       | FALSE | FALSE |
| ILMN_1779965 | AK1        | FALSE | FALSE |
| ILMN_1719303 | P4HB       | FALSE | FALSE |
| ILMN_2143261 | CXorf40B   | FALSE | FALSE |
| ILMN_1786105 | PCBD1      | FALSE | FALSE |
| ILMN_1784105 | SLC38A7    | FALSE | FALSE |
| ILMN_1788315 | SIN3B      | FALSE | FALSE |
| ILMN_1799614 | PNPLA6     | FALSE | FALSE |
| ILMN_1689712 | RPLP1      | FALSE | FALSE |
| ILMN_1695432 | TPST2      | FALSE | FALSE |
| ILMN_1765801 | GAA        | FALSE | FALSE |
| ILMN_1749368 | HIST1H3H   | FALSE | FALSE |
| ILMN_1675523 | PPAP2C     | FALSE | FALSE |
| ILMN_2041788 | PLS3       | FALSE | FALSE |
| ILMN_1667356 | PPP1R21    | FALSE | FALSE |
| ILMN_1741727 | QPCT       | FALSE | FALSE |
| ILMN_1788942 | GGT6       | FALSE | FALSE |
| ILMN_1782618 | C9orf16    | FALSE | FALSE |
| ILMN_1658261 | MAPKBP1    | FALSE | FALSE |
| ILMN_1752333 | SLC35E1    | FALSE | FALSE |

|              |              |       |       |
|--------------|--------------|-------|-------|
| ILMN_1866887 | NA           | FALSE | FALSE |
| ILMN_1730032 | BOK          | FALSE | FALSE |
| ILMN_1725620 | GGNBP2       | FALSE | FALSE |
| ILMN_3249101 | SDR9C7       | FALSE | FALSE |
| ILMN_1773906 | NCOA4        | TRUE  | FALSE |
| ILMN_2401873 | DUSP10       | TRUE  | TRUE  |
| ILMN_3249658 | LOC100134868 | FALSE | FALSE |
| ILMN_1769787 | SELO         | FALSE | FALSE |
| ILMN_1701466 | PEX16        | FALSE | FALSE |
| ILMN_1701487 | TAOK2        | FALSE | FALSE |
| ILMN_1674560 | GBA2         | FALSE | FALSE |
| ILMN_1719517 | CTTNBP2NL    | FALSE | FALSE |
| ILMN_2399622 | AP1G1        | FALSE | FALSE |
| ILMN_2355462 | CYFIP1       | FALSE | FALSE |
| ILMN_3300198 | NA           | TRUE  | FALSE |
| ILMN_1855230 | NA           | FALSE | FALSE |
| ILMN_1715647 | VANGL2       | FALSE | FALSE |
| ILMN_3245907 | FAM160B2     | FALSE | FALSE |
| ILMN_1793831 | TRADD        | FALSE | FALSE |
| ILMN_3244521 | LINC00294    | TRUE  | FALSE |
| ILMN_1673548 | LGALS1       | FALSE | FALSE |
| ILMN_2057768 | SLC35D1      | FALSE | FALSE |
| ILMN_1809467 | VAMP5        | FALSE | FALSE |
| ILMN_1756146 | WDR45        | FALSE | FALSE |
| ILMN_1683277 | KIAA0319L    | FALSE | FALSE |
| ILMN_3262439 | NA           | FALSE | FALSE |
| ILMN_1684956 | ARSD         | FALSE | FALSE |
| ILMN_1702322 | ALS2CL       | TRUE  | FALSE |
| ILMN_2211950 | SRP14        | FALSE | FALSE |
| ILMN_1786469 | FBXO22       | FALSE | FALSE |
| ILMN_2388874 | GRHL3        | FALSE | FALSE |
| ILMN_1657624 | NSFL1C       | FALSE | FALSE |
| ILMN_1789839 | GTF3C1       | FALSE | FALSE |
| ILMN_1688639 | FBXL2        | FALSE | FALSE |
| ILMN_1767651 | TECPR1       | FALSE | FALSE |
| ILMN_1742456 | OSTF1        | FALSE | FALSE |
| ILMN_2359453 | ERGIC3       | TRUE  | TRUE  |
| ILMN_1770425 | CDIPT        | FALSE | FALSE |
| ILMN_1704713 | CSNK1G1      | FALSE | FALSE |
| ILMN_1663407 | SURF1        | FALSE | FALSE |
| ILMN_3246783 | TXLNGY       | FALSE | FALSE |
| ILMN_1719543 | MAF          | TRUE  | FALSE |
| ILMN_1652128 | LMBRD1       | FALSE | FALSE |
| ILMN_1701967 | SHC1         | FALSE | FALSE |
| ILMN_1690920 | SP100        | FALSE | FALSE |
| ILMN_2402805 | TRPC4AP      | FALSE | TRUE  |

|              |          |       |       |
|--------------|----------|-------|-------|
| ILMN_1777683 | ADAMTSL4 | FALSE | FALSE |
| ILMN_1692199 | RNF103   | FALSE | FALSE |
| ILMN_1746494 | FNTA     | FALSE | TRUE  |
| ILMN_2381197 | RNF19A   | FALSE | TRUE  |
| ILMN_1807277 | IFI30    | FALSE | FALSE |
| ILMN_1755383 | LRRC1    | FALSE | FALSE |
| ILMN_1762764 | SH3BGRL2 | FALSE | FALSE |
| ILMN_2093748 | ZNF669   | FALSE | FALSE |
| ILMN_1659490 | NA       | FALSE | FALSE |
| ILMN_1695679 | NWD2     | FALSE | TRUE  |
| ILMN_1672843 | FBXO8    | FALSE | TRUE  |
| ILMN_3199438 | NA       | FALSE | FALSE |
| ILMN_3295735 | FRAT1    | FALSE | FALSE |
| ILMN_3275771 | FTH1     | FALSE | FALSE |
| ILMN_1786396 | ZZEF1    | FALSE | FALSE |
| ILMN_1795838 | C4orf19  | FALSE | FALSE |
| ILMN_3251379 | SLC35E1  | FALSE | FALSE |
| ILMN_2341815 | TFG      | FALSE | FALSE |
| ILMN_1804673 | SLC16A4  | FALSE | FALSE |
| ILMN_1719883 | CYP4F11  | FALSE | FALSE |
| ILMN_3307158 | ATG4A    | FALSE | FALSE |
| ILMN_1807873 | SNX6     | FALSE | FALSE |
| ILMN_1654016 | MYL12B   | FALSE | FALSE |
| ILMN_1769665 | RAB5C    | FALSE | FALSE |
| ILMN_1756126 | STUB1    | FALSE | FALSE |
| ILMN_1762876 | DSCR4    | FALSE | FALSE |
| ILMN_1780504 | C19orf26 | FALSE | FALSE |
| ILMN_1776109 | ZNF622   | FALSE | FALSE |
| ILMN_1787265 | ZNF503   | TRUE  | FALSE |
| ILMN_1776088 | NAT9     | FALSE | FALSE |
| ILMN_1714945 | ITPKC    | FALSE | FALSE |
| ILMN_1729175 | FBXO3    | FALSE | FALSE |
| ILMN_1803995 | TM7SF3   | FALSE | FALSE |
| ILMN_1808938 | PIGF     | FALSE | FALSE |
| ILMN_1651347 | SERTAD2  | TRUE  | FALSE |
| ILMN_1751328 | FAM83H   | FALSE | FALSE |
| ILMN_1745772 | ASCC3    | FALSE | FALSE |
| ILMN_1683044 | PPP1R2   | FALSE | TRUE  |
| ILMN_1665831 | CLPTM1   | FALSE | TRUE  |
| ILMN_1806010 | CUL9     | FALSE | TRUE  |
| ILMN_2400407 | CNTN1    | FALSE | FALSE |
| ILMN_2346573 | PSME3    | FALSE | FALSE |
| ILMN_1746378 | GHDC     | FALSE | FALSE |
| ILMN_1785765 | TM9SF2   | FALSE | FALSE |
| ILMN_3241979 | TMEM179B | TRUE  | FALSE |
| ILMN_1777061 | ZSWIM6   | FALSE | FALSE |

|              |           |       |       |
|--------------|-----------|-------|-------|
| ILMN_1697529 | RNF10     | FALSE | FALSE |
| ILMN_1917341 | PTPN14    | FALSE | FALSE |
| ILMN_3238707 | SNORA8    | TRUE  | FALSE |
| ILMN_1751887 | PREP      | FALSE | FALSE |
| ILMN_1677963 | TMCC1     | FALSE | FALSE |
| ILMN_1717594 | AP5B1     | FALSE | FALSE |
| ILMN_1912083 | NA        | FALSE | FALSE |
| ILMN_2157951 | STX6      | FALSE | FALSE |
| ILMN_2401878 | DUSP10    | TRUE  | TRUE  |
| ILMN_2324561 | SLC7A6    | FALSE | FALSE |
| ILMN_1722726 | ARHGAP32  | FALSE | FALSE |
| ILMN_1775823 | POFUT2    | TRUE  | FALSE |
| ILMN_1655748 | ZSCAN31   | FALSE | FALSE |
| ILMN_3264466 | MTFR1L    | FALSE | FALSE |
| ILMN_3230241 | NA        | FALSE | FALSE |
| ILMN_2268068 | MAPKAP1   | FALSE | FALSE |
| ILMN_1730487 | CALD1     | FALSE | FALSE |
| ILMN_1681890 | DYNLT3    | FALSE | FALSE |
| ILMN_2074773 | KCNK6     | FALSE | FALSE |
| ILMN_1760950 | SLC23A1   | FALSE | FALSE |
| ILMN_1764628 | LYPLA2    | FALSE | FALSE |
| ILMN_1680774 | LOC728392 | FALSE | FALSE |
| ILMN_1789410 | ZSCAN21   | FALSE | FALSE |
| ILMN_1767470 | SCPEP1    | FALSE | FALSE |
| ILMN_2374244 | DYRK2     | FALSE | FALSE |
| ILMN_2394561 | IRF2BP2   | FALSE | FALSE |
| ILMN_1669931 | TM9SF3    | FALSE | FALSE |
| ILMN_1798485 | ATP6V1E1  | FALSE | FALSE |
| ILMN_3247802 | PRRC2B    | FALSE | FALSE |
| ILMN_1685602 | TMEM41A   | FALSE | FALSE |
| ILMN_1713380 | EIF2B2    | FALSE | FALSE |
| ILMN_1849494 | EFR3B     | FALSE | FALSE |
| ILMN_1670609 | ATOX1     | FALSE | FALSE |
| ILMN_1751886 | REC8      | FALSE | TRUE  |
| ILMN_1815656 | SERINC3   | FALSE | TRUE  |
| ILMN_2406043 | NA        | FALSE | FALSE |
| ILMN_1704091 | DGAT1     | FALSE | FALSE |
| ILMN_1778876 | FAM179B   | FALSE | FALSE |
| ILMN_1667306 | RANBP10   | FALSE | FALSE |
| ILMN_1726466 | HDHD3     | FALSE | FALSE |
| ILMN_1658759 | PEX19     | FALSE | FALSE |
| ILMN_1779401 | CHP1      | FALSE | FALSE |
| ILMN_1679979 | PLK3      | FALSE | FALSE |
| ILMN_1716547 | NAGK      | FALSE | FALSE |
| ILMN_2374770 | TAX1BP1   | FALSE | FALSE |
| ILMN_1804306 | LYPLA2    | FALSE | FALSE |

|              |         |       |       |
|--------------|---------|-------|-------|
| ILMN_1786021 | PRKAB2  | FALSE | FALSE |
| ILMN_1696757 | TTC14   | FALSE | FALSE |
| ILMN_1702065 | MFSD5   | FALSE | FALSE |
| ILMN_1697561 | FBXL16  | FALSE | FALSE |
| ILMN_1656482 | OSBPL2  | TRUE  | FALSE |
| ILMN_2246510 | TSC1    | TRUE  | FALSE |
| ILMN_1754279 | FBXW7   | FALSE | FALSE |
| ILMN_1665964 | GAB2    | FALSE | FALSE |
| ILMN_2388484 | MAP2    | FALSE | FALSE |
| ILMN_1703142 | Mar-02  | FALSE | TRUE  |
| ILMN_1761941 | FAM198B | FALSE | TRUE  |
| ILMN_1808220 | LCE3E   | FALSE | FALSE |
| ILMN_2386982 | PRKCZ   | FALSE | FALSE |
| ILMN_1862521 | DENND1B | FALSE | FALSE |
| ILMN_1724718 | NCK2    | FALSE | FALSE |
| ILMN_1653404 | NKIRAS2 | FALSE | FALSE |
| ILMN_1688205 | KLK10   | FALSE | FALSE |
| ILMN_1857081 | NA      | FALSE | FALSE |
| ILMN_1680403 | SSR4    | TRUE  | FALSE |
| ILMN_3262345 | MROH1   | FALSE | FALSE |
| ILMN_1793290 | WDR60   | FALSE | FALSE |
| ILMN_1810055 | ITFG3   | FALSE | FALSE |
| ILMN_2159453 | STXBP2  | FALSE | TRUE  |
| ILMN_2256359 | ZNF823  | FALSE | FALSE |
| ILMN_2098643 | FADS3   | FALSE | FALSE |
| ILMN_1804988 | MOAP1   | TRUE  | FALSE |
| ILMN_2174081 | ZNF133  | FALSE | TRUE  |
| ILMN_1800543 | SCFD1   | FALSE | FALSE |
| ILMN_1662524 | CXCR1   | FALSE | FALSE |
| ILMN_1658247 | OAS1    | FALSE | FALSE |
| ILMN_1791508 | MMP28   | TRUE  | FALSE |
| ILMN_1686735 | LYPLA2  | FALSE | FALSE |
| ILMN_2341595 | KITLG   | FALSE | FALSE |
| ILMN_1748915 | S100A12 | FALSE | FALSE |
| ILMN_1681016 | SPNS1   | FALSE | FALSE |
| ILMN_1739618 | ZNF408  | FALSE | FALSE |
| ILMN_1779374 | AMMECR1 | FALSE | FALSE |
| ILMN_1653266 | DNAJB14 | FALSE | FALSE |
| ILMN_1797342 | FNBP1   | FALSE | FALSE |
| ILMN_1719316 | TMED3   | FALSE | FALSE |
| ILMN_3242004 | NA      | TRUE  | FALSE |
| ILMN_1911605 | FRS2    | FALSE | FALSE |
| ILMN_2103761 | TLE4    | FALSE | FALSE |
| ILMN_1713301 | DGCR2   | FALSE | FALSE |
| ILMN_2383107 | VPS41   | FALSE | FALSE |
| ILMN_1728498 | PCBP4   | FALSE | FALSE |

|              |           |       |       |
|--------------|-----------|-------|-------|
| ILMN_2087303 | XKR8      | FALSE | FALSE |
| ILMN_1773313 | NA        | FALSE | FALSE |
| ILMN_1755721 | ANXA9     | FALSE | FALSE |
| ILMN_1794230 | SCAND1    | FALSE | FALSE |
| ILMN_2366634 | PKM       | FALSE | FALSE |
| ILMN_1772124 | ATRN      | TRUE  | TRUE  |
| ILMN_2156953 | ZFAND6    | FALSE | TRUE  |
| ILMN_1677098 | YPEL2     | TRUE  | FALSE |
| ILMN_1802251 | PTTG1IP   | TRUE  | FALSE |
| ILMN_1810591 | PUS10     | FALSE | FALSE |
| ILMN_2397721 | GLB1      | FALSE | FALSE |
| ILMN_2325337 | APOL2     | FALSE | FALSE |
| ILMN_1756715 | RUNDC3A   | FALSE | FALSE |
| ILMN_1714587 | NA        | FALSE | FALSE |
| ILMN_1783771 | UBE2Z     | FALSE | FALSE |
| ILMN_1806312 | TMEM230   | FALSE | FALSE |
| ILMN_1703246 | SBF1      | FALSE | FALSE |
| ILMN_2411731 | HPS5      | FALSE | FALSE |
| ILMN_2313782 | ATG4A     | FALSE | FALSE |
| ILMN_3270473 | C6orf132  | FALSE | FALSE |
| ILMN_2149566 | VPS25     | FALSE | FALSE |
| ILMN_1654516 | TMEM120A  | FALSE | FALSE |
| ILMN_1670130 | ARID3A    | FALSE | FALSE |
| ILMN_1800975 | PSME3     | FALSE | FALSE |
| ILMN_1701869 | FBXO22    | FALSE | FALSE |
| ILMN_3247023 | CASC15    | FALSE | FALSE |
| ILMN_1785988 | CSNK1A1   | FALSE | FALSE |
| ILMN_1721575 | VPS18     | FALSE | FALSE |
| ILMN_1735415 | NUDT16L1  | FALSE | TRUE  |
| ILMN_1753608 | TMEM131   | FALSE | FALSE |
| ILMN_1778203 | CLN5      | FALSE | FALSE |
| ILMN_1813386 | CORO6     | FALSE | FALSE |
| ILMN_3307827 | DNAJC4    | FALSE | FALSE |
| ILMN_3203444 | CERCAM    | FALSE | FALSE |
| ILMN_2337955 | ZMAT5     | FALSE | FALSE |
| ILMN_1789186 | OBFC1     | FALSE | FALSE |
| ILMN_1716195 | HIST1H2BG | FALSE | FALSE |
| ILMN_1652918 | RHOF      | FALSE | FALSE |
| ILMN_1745697 | MGRN1     | FALSE | FALSE |
| ILMN_1763828 | MTF1      | FALSE | FALSE |
| ILMN_2263466 | ACADVL    | FALSE | FALSE |
| ILMN_2352097 | GPR56     | FALSE | FALSE |
| ILMN_2354547 | TUSC3     | FALSE | FALSE |
| ILMN_1815308 | SDC1      | FALSE | FALSE |
| ILMN_1776993 | COG2      | FALSE | FALSE |
| ILMN_2161286 | STRIP2    | FALSE | FALSE |

|              |          |       |       |
|--------------|----------|-------|-------|
| ILMN_2406557 | ALDH4A1  | FALSE | FALSE |
| ILMN_2140700 | CRIPAK   | TRUE  | FALSE |
| ILMN_1733869 | OGDH     | FALSE | FALSE |
| ILMN_1742731 | SLC35A2  | FALSE | TRUE  |
| ILMN_1734290 | MAPRE3   | TRUE  | FALSE |
| ILMN_1753426 | KIAA0556 | FALSE | FALSE |
| ILMN_1774659 | NA       | FALSE | FALSE |
| ILMN_3268165 | RNF7     | FALSE | FALSE |
| ILMN_1680104 | SLC35C1  | FALSE | FALSE |
| ILMN_1867439 | NA       | FALSE | FALSE |
| ILMN_1836776 | MPRIIP   | FALSE | FALSE |
| ILMN_2396571 | GPR108   | FALSE | FALSE |
| ILMN_1677843 | RAB24    | TRUE  | FALSE |
| ILMN_1720865 | OSBPL7   | FALSE | FALSE |
| ILMN_1739161 | PPAP2A   | FALSE | FALSE |
| ILMN_1763228 | MEF2D    | FALSE | FALSE |
| ILMN_1660000 | NA       | FALSE | TRUE  |
| ILMN_3210946 | SELT     | FALSE | FALSE |
| ILMN_1719165 | BRMS1    | FALSE | FALSE |
| ILMN_1812327 | RNF19A   | FALSE | TRUE  |
| ILMN_1815306 | AP2A1    | TRUE  | TRUE  |
| ILMN_1664154 | NA       | FALSE | FALSE |
| ILMN_2089175 | SYAP1    | FALSE | FALSE |
| ILMN_1712806 | AP1S1    | FALSE | FALSE |
| ILMN_1891857 | RAB2A    | FALSE | FALSE |
| ILMN_1757604 | TPM2     | FALSE | FALSE |
| ILMN_1780302 | DYNC1H1  | FALSE | FALSE |
| ILMN_1691499 | TJP1     | FALSE | FALSE |
| ILMN_1807767 | GSE1     | FALSE | FALSE |
| ILMN_1673950 | NA       | FALSE | FALSE |
| ILMN_1786972 | SARS     | FALSE | FALSE |
| ILMN_1795905 | ZBTB4    | FALSE | FALSE |
| ILMN_1681777 | SHROOM2  | FALSE | FALSE |
| ILMN_1813517 | DISP2    | FALSE | FALSE |
| ILMN_1692785 | KLHL21   | FALSE | FALSE |
| ILMN_2197519 | ZNF627   | FALSE | FALSE |
| ILMN_1678268 | VPS8     | TRUE  | FALSE |
| ILMN_1789436 | DENND1B  | FALSE | FALSE |
| ILMN_2155480 | NA       | FALSE | FALSE |
| ILMN_1785528 | NA       | FALSE | FALSE |
| ILMN_1676600 | SEC24C   | TRUE  | FALSE |
| ILMN_1682919 | PAFAH2   | FALSE | FALSE |
| ILMN_2052163 | YIPF1    | FALSE | TRUE  |
| ILMN_1750497 | HCAR2    | FALSE | FALSE |
| ILMN_2317580 | SHANK3   | FALSE | FALSE |
| ILMN_1805345 | MOSPD3   | FALSE | FALSE |



|              |          |       |       |
|--------------|----------|-------|-------|
| ILMN_1726512 | ZSCAN2   | TRUE  | FALSE |
| ILMN_2325338 | APOL2    | FALSE | FALSE |
| ILMN_3241136 | NA       | FALSE | FALSE |
| ILMN_1676665 | NA       | FALSE | FALSE |
| ILMN_1739558 | CRELD1   | FALSE | FALSE |
| ILMN_1803510 | NA       | FALSE | FALSE |
| ILMN_2367469 | CARS     | FALSE | FALSE |
| ILMN_1741491 | ZNHIT1   | FALSE | FALSE |
| ILMN_1806408 | ACADVL   | FALSE | FALSE |
| ILMN_1733757 | TMEM179B | TRUE  | FALSE |
| ILMN_2347949 | G6PD     | FALSE | FALSE |
| ILMN_1750429 | MKNK1    | FALSE | FALSE |
| ILMN_2144573 | CTBS     | FALSE | TRUE  |
| ILMN_1694491 | CCNG1    | FALSE | FALSE |
| ILMN_1781983 | AP1B1    | FALSE | FALSE |
| ILMN_1666192 | DCTN5    | FALSE | FALSE |
| ILMN_2374383 | TSPAN17  | FALSE | FALSE |
| ILMN_1730639 | SLC22A15 | FALSE | FALSE |
| ILMN_1811489 | OXR1     | FALSE | FALSE |
| ILMN_1852022 | PLIN4    | FALSE | FALSE |
| ILMN_2353161 | MSLN     | FALSE | FALSE |
| ILMN_1695899 | RPS3A    | FALSE | FALSE |
| ILMN_2169761 | CPNE8    | FALSE | TRUE  |
| ILMN_3240524 | MFSD6    | FALSE | FALSE |
| ILMN_2195236 | PGRMC2   | FALSE | FALSE |
| ILMN_1668228 | RPL18    | FALSE | FALSE |
| ILMN_1669848 | FAM25A   | FALSE | FALSE |
| ILMN_2157099 | CCNA1    | FALSE | FALSE |
| ILMN_2256953 | CASZ1    | FALSE | FALSE |
| ILMN_2359456 | ERGIC3   | FALSE | TRUE  |
| ILMN_2241124 | GPR110   | FALSE | TRUE  |
| ILMN_1787212 | CDKN1A   | FALSE | FALSE |
| ILMN_1669557 | AIM1L    | FALSE | FALSE |
| ILMN_1798123 | ELOVL1   | FALSE | FALSE |
| ILMN_1714586 | VGLL3    | FALSE | FALSE |
| ILMN_1812474 | TFG      | FALSE | FALSE |
| ILMN_1652445 | RAC1     | FALSE | FALSE |
| ILMN_1753890 | IFT20    | FALSE | FALSE |
| ILMN_1664233 | TMC6     | FALSE | FALSE |
| ILMN_3272378 | EZR      | FALSE | FALSE |
| ILMN_1757388 | OCEL1    | FALSE | FALSE |
| ILMN_1687351 | ANKRA2   | FALSE | TRUE  |
| ILMN_1764769 | VWA5A    | FALSE | FALSE |
| ILMN_1666076 | ARHGEF4  | FALSE | FALSE |
| ILMN_1812403 | BCAP31   | TRUE  | FALSE |
| ILMN_1652631 | GLIPR2   | FALSE | FALSE |

|              |           |       |       |
|--------------|-----------|-------|-------|
| ILMN_1659240 | MTMR14    | FALSE | FALSE |
| ILMN_1705261 | CAPN1     | FALSE | FALSE |
| ILMN_1725130 | FAM50A    | FALSE | FALSE |
| ILMN_2384544 | ADAM15    | FALSE | FALSE |
| ILMN_1761797 | CSTB      | FALSE | FALSE |
| ILMN_1800354 | CST3      | FALSE | FALSE |
| ILMN_1752837 | ARL8B     | FALSE | FALSE |
| ILMN_3231638 | FAM160B1  | TRUE  | FALSE |
| ILMN_1814726 | SCARB2    | FALSE | FALSE |
| ILMN_1679401 | TRPM4     | FALSE | TRUE  |
| ILMN_1794122 | ZNF79     | TRUE  | FALSE |
| ILMN_1674050 | COL8A2    | FALSE | FALSE |
| ILMN_1754179 | AP1G2     | TRUE  | FALSE |
| ILMN_2380243 | SMAGP     | FALSE | FALSE |
| ILMN_3233930 | SYNGR2    | FALSE | FALSE |
| ILMN_2113490 | NTN4      | FALSE | FALSE |
| ILMN_2356654 | LGALS8    | FALSE | FALSE |
| ILMN_1735155 | GLB1      | FALSE | FALSE |
| ILMN_1653771 | WDR63     | FALSE | FALSE |
| ILMN_3307791 | FAM69A    | FALSE | FALSE |
| ILMN_1654392 | KHNYN     | FALSE | FALSE |
| ILMN_1837167 | NA        | FALSE | FALSE |
| ILMN_2281810 | PSG4      | FALSE | FALSE |
| ILMN_1808508 | KITLG     | FALSE | FALSE |
| ILMN_1727080 | MYO6      | FALSE | FALSE |
| ILMN_1809813 | PGF       | FALSE | FALSE |
| ILMN_1752932 | MPZL2     | FALSE | FALSE |
| ILMN_1753101 | VTCN1     | FALSE | FALSE |
| ILMN_1757639 | SPTSSB    | FALSE | FALSE |
| ILMN_3216365 | NA        | FALSE | FALSE |
| ILMN_1749662 | GPX1      | FALSE | FALSE |
| ILMN_1659415 | LAMTOR3   | FALSE | FALSE |
| ILMN_1678957 | WDR55     | FALSE | FALSE |
| ILMN_1789136 | NA        | FALSE | FALSE |
| ILMN_1777096 | NA        | FALSE | FALSE |
| ILMN_1807283 | NDST1     | FALSE | FALSE |
| ILMN_1732060 | ARHGAP1   | FALSE | FALSE |
| ILMN_1702168 | HSD17B12  | FALSE | FALSE |
| ILMN_1784333 | SECISBP2L | FALSE | FALSE |
| ILMN_1789005 | ATP6V0C   | FALSE | FALSE |
| ILMN_1750409 | RAB9A     | FALSE | FALSE |
| ILMN_3251501 | SERF2     | FALSE | FALSE |
| ILMN_1764571 | ARHGAP23  | FALSE | TRUE  |
| ILMN_2366445 | KRT80     | FALSE | FALSE |
| ILMN_1731181 | TEX2      | FALSE | FALSE |
| ILMN_1792837 | CIAO1     | FALSE | FALSE |

|              |           |       |       |
|--------------|-----------|-------|-------|
| ILMN_1718063 | LIPA      | FALSE | FALSE |
| ILMN_1655637 | UPK1A     | FALSE | FALSE |
| ILMN_2071937 | ATP6V0E1  | FALSE | FALSE |
| ILMN_2203588 | MYL5      | TRUE  | FALSE |
| ILMN_2208777 | NHLH2     | FALSE | TRUE  |
| ILMN_1758497 | TTYH1     | FALSE | FALSE |
| ILMN_1715635 | ATP6V0E1  | FALSE | FALSE |
| ILMN_1660079 | RNF44     | FALSE | FALSE |
| ILMN_1801516 | GPC1      | FALSE | FALSE |
| ILMN_1803889 | CCDC64B   | FALSE | FALSE |
| ILMN_2286400 | CAPS      | FALSE | FALSE |
| ILMN_2091846 | FTH1      | FALSE | FALSE |
| ILMN_1711715 | NA        | FALSE | FALSE |
| ILMN_1749915 | RSRP1     | FALSE | FALSE |
| ILMN_1728426 | INPPL1    | FALSE | FALSE |
| ILMN_1784554 | NA        | FALSE | FALSE |
| ILMN_1735180 | NCSTN     | FALSE | FALSE |
| ILMN_1738268 | IP6K3     | FALSE | FALSE |
| ILMN_1773901 | STX12     | FALSE | FALSE |
| ILMN_3256325 | CYB561D1  | TRUE  | TRUE  |
| ILMN_1803564 | YIPF1     | FALSE | TRUE  |
| ILMN_1720965 | TULP4     | TRUE  | FALSE |
| ILMN_1772706 | NA        | TRUE  | FALSE |
| ILMN_3307877 | C21orf58  | FALSE | FALSE |
| ILMN_2285802 | SEC14L1   | FALSE | FALSE |
| ILMN_1790014 | METRNL    | FALSE | FALSE |
| ILMN_1662839 | PLEKHA1   | FALSE | FALSE |
| ILMN_1807455 | DHRS7     | FALSE | FALSE |
| ILMN_2126344 | SEC16A    | FALSE | FALSE |
| ILMN_1662973 | CD82      | FALSE | FALSE |
| ILMN_1701237 | SH2D1B    | FALSE | FALSE |
| ILMN_1659610 | TJP3      | FALSE | FALSE |
| ILMN_2162989 | TMEM189   | FALSE | FALSE |
| ILMN_1775016 | MPZL2     | FALSE | FALSE |
| ILMN_1658911 | AP3S1     | FALSE | FALSE |
| ILMN_1681542 | HIST1H4E  | FALSE | FALSE |
| ILMN_1653358 | FUT3      | FALSE | TRUE  |
| ILMN_2410986 | STAT3     | FALSE | FALSE |
| ILMN_1677607 | SC5D      | FALSE | FALSE |
| ILMN_1756849 | HIST1H2AE | FALSE | FALSE |
| ILMN_1793522 | PRKAB1    | FALSE | FALSE |
| ILMN_1664012 | CANT1     | FALSE | FALSE |
| ILMN_1657864 | TMUB2     | FALSE | FALSE |
| ILMN_1798177 | CHURC1    | TRUE  | FALSE |
| ILMN_2339234 | TRIM16    | FALSE | FALSE |
| ILMN_2105253 | PTGR2     | FALSE | FALSE |

|              |            |       |       |
|--------------|------------|-------|-------|
| ILMN_1694084 | CYTH1      | FALSE | FALSE |
| ILMN_1666004 | WASL       | FALSE | FALSE |
| ILMN_2312228 | FUT6       | FALSE | FALSE |
| ILMN_1741613 | SERINC1    | FALSE | FALSE |
| ILMN_1696065 | SDF4       | FALSE | FALSE |
| ILMN_1870041 | NA         | FALSE | FALSE |
| ILMN_1775692 | EIF4G3     | FALSE | FALSE |
| ILMN_3303295 | NA         | FALSE | FALSE |
| ILMN_3297945 | UBA1       | FALSE | FALSE |
| ILMN_1697409 | TNFRSF14   | FALSE | FALSE |
| ILMN_3307659 | SFT2D2     | FALSE | FALSE |
| ILMN_2161556 | C12orf49   | FALSE | TRUE  |
| ILMN_1774083 | TRIAP1     | FALSE | FALSE |
| ILMN_1710427 | VPS37B     | FALSE | FALSE |
| ILMN_3274790 | LOC283693  | FALSE | FALSE |
| ILMN_2352303 | RASSF2     | FALSE | FALSE |
| ILMN_2398432 | BRMS1      | FALSE | FALSE |
| ILMN_1693310 | ITFG1      | FALSE | FALSE |
| ILMN_1691048 | SLC22A18AS | FALSE | FALSE |
| ILMN_1699254 | PLEKHH1    | FALSE | FALSE |
| ILMN_1860638 | ST3GAL1    | FALSE | FALSE |
| ILMN_1741356 | PRICKLE1   | FALSE | FALSE |
| ILMN_1721704 | FNTA       | FALSE | TRUE  |
| ILMN_1790533 | PHACTR2    | FALSE | FALSE |
| ILMN_3247223 | TPBG       | FALSE | FALSE |
| ILMN_2299795 | CPM        | FALSE | FALSE |
| ILMN_1788931 | DOCK8      | TRUE  | FALSE |
| ILMN_2157421 | STUB1      | FALSE | FALSE |
| ILMN_2071641 | KCNK1      | FALSE | FALSE |
| ILMN_1692168 | UBE2Z      | FALSE | FALSE |
| ILMN_1679782 | BLOC1S2    | TRUE  | FALSE |
| ILMN_1746883 | SAT2       | FALSE | FALSE |
| ILMN_3228294 | RPL28      | FALSE | FALSE |
| ILMN_1769390 | ABHD15     | FALSE | FALSE |
| ILMN_3276861 | RPS2       | FALSE | FALSE |
| ILMN_1795300 | ARHGEF37   | FALSE | FALSE |
| ILMN_1772768 | PSG7       | FALSE | FALSE |
| ILMN_3251545 | CHMP5      | FALSE | FALSE |
| ILMN_1660554 | VWA1       | FALSE | FALSE |
| ILMN_1651950 | TPST1      | FALSE | FALSE |
| ILMN_1682894 | NA         | FALSE | FALSE |
| ILMN_1720838 | DECR1      | TRUE  | TRUE  |
| ILMN_1687266 | NA         | FALSE | FALSE |
| ILMN_1797604 | CAP1       | FALSE | FALSE |
| ILMN_1786722 | ZNF385A    | FALSE | FALSE |
| ILMN_1684210 | NIPAL3     | FALSE | FALSE |

|              |           |       |       |
|--------------|-----------|-------|-------|
| ILMN_1787326 | SNORA65   | FALSE | FALSE |
| ILMN_2180352 | DIP2B     | FALSE | FALSE |
| ILMN_1764177 | JARID2    | FALSE | FALSE |
| ILMN_1759341 | MAN2B1    | FALSE | FALSE |
| ILMN_1719064 | KCTD10    | FALSE | FALSE |
| ILMN_1697652 | PLEKHB2   | FALSE | FALSE |
| ILMN_2108735 | EEF1A2    | FALSE | TRUE  |
| ILMN_1711073 | NA        | FALSE | FALSE |
| ILMN_2159152 | NA        | FALSE | FALSE |
| ILMN_1771264 | ELL3      | FALSE | FALSE |
| ILMN_1757631 | DBNDD1    | FALSE | FALSE |
| ILMN_1748675 | TMPRSS11B | FALSE | FALSE |
| ILMN_1734543 | PTPRE     | FALSE | FALSE |
| ILMN_1657871 | RSAD2     | FALSE | FALSE |
| ILMN_1679920 | RPS12     | FALSE | FALSE |
| ILMN_1773741 | GOLGA5    | FALSE | FALSE |
| ILMN_2337263 | PKIB      | FALSE | FALSE |
| ILMN_1746517 | KYNU      | FALSE | FALSE |
| ILMN_1651229 | IPO13     | FALSE | FALSE |
| ILMN_1781580 | BRI3      | FALSE | FALSE |
| ILMN_1697420 | TINF2     | FALSE | FALSE |
| ILMN_1720829 | ZFP36     | FALSE | FALSE |
| ILMN_2356111 | SLC41A3   | FALSE | FALSE |
| ILMN_3292008 | RPL13AP3  | FALSE | FALSE |
| ILMN_2398274 | PYCARD    | FALSE | FALSE |
| ILMN_1716869 | GPM6A     | TRUE  | FALSE |
| ILMN_1736154 | LZTS3     | FALSE | FALSE |
| ILMN_1651538 | NUMBL     | FALSE | FALSE |
| ILMN_1704431 | NA        | FALSE | FALSE |
| ILMN_1710482 | APLP2     | FALSE | FALSE |
| ILMN_1782863 | FAM83B    | FALSE | FALSE |
| ILMN_3240222 | SGK223    | FALSE | FALSE |
| ILMN_1862018 | ATXN7L3   | FALSE | FALSE |
| ILMN_2184064 | ARRDC4    | FALSE | FALSE |
| ILMN_1679358 | ZDHHC5    | FALSE | FALSE |
| ILMN_1744963 | ERO1L     | FALSE | FALSE |
| ILMN_1694486 | TCIRG1    | TRUE  | TRUE  |
| ILMN_2082314 | TOM1      | FALSE | FALSE |
| ILMN_1654060 | MKNK2     | FALSE | TRUE  |
| ILMN_2097185 | PUS3      | TRUE  | FALSE |
| ILMN_2061327 | TAF13     | FALSE | FALSE |
| ILMN_1656335 | RIT1      | FALSE | FALSE |
| ILMN_1752579 | ATP6V0A1  | FALSE | FALSE |
| ILMN_2403730 | ATP6V1H   | FALSE | FALSE |
| ILMN_1815673 | DKK3      | FALSE | FALSE |
| ILMN_1710209 | MFSD6     | FALSE | FALSE |

|              |           |       |       |
|--------------|-----------|-------|-------|
| ILMN_2315694 | STRADA    | FALSE | FALSE |
| ILMN_3283772 | GAPDH     | FALSE | FALSE |
| ILMN_1739876 | RAB3GAP1  | TRUE  | FALSE |
| ILMN_1750674 | SDSL      | FALSE | FALSE |
| ILMN_1747281 | EVI5L     | FALSE | TRUE  |
| ILMN_2161330 | SPDEF     | FALSE | FALSE |
| ILMN_1761912 | MGAT1     | FALSE | FALSE |
| ILMN_1746408 | MIDN      | FALSE | FALSE |
| ILMN_3241091 | TMEM164   | FALSE | FALSE |
| ILMN_1812570 | SHC1      | FALSE | FALSE |
| ILMN_1739335 | OST4      | FALSE | FALSE |
| ILMN_1743836 | MXRA7     | FALSE | FALSE |
| ILMN_1673604 | YIPF3     | FALSE | FALSE |
| ILMN_1777261 | FAM3C     | FALSE | FALSE |
| ILMN_1692219 | RAB11FIP1 | FALSE | FALSE |
| ILMN_3197732 | RPL7A     | FALSE | FALSE |
| ILMN_1873620 | TSPAN14   | FALSE | FALSE |
| ILMN_2094106 | HSD17B12  | FALSE | FALSE |
| ILMN_2081087 | HSPA12A   | FALSE | FALSE |
| ILMN_2125374 | CMAS      | FALSE | FALSE |
| ILMN_1721563 | TMEM127   | FALSE | FALSE |
| ILMN_3194248 | NA        | FALSE | FALSE |
| ILMN_1802628 | PPAPDC2   | FALSE | FALSE |
| ILMN_3243381 | MLEC      | FALSE | FALSE |
| ILMN_1722089 | RNF217    | TRUE  | TRUE  |
| ILMN_1663787 | KLK3      | FALSE | FALSE |
| ILMN_1803452 | CRCT1     | FALSE | FALSE |
| ILMN_1692731 | TTYH3     | FALSE | FALSE |
| ILMN_1731418 | SP110     | FALSE | FALSE |
| ILMN_1715476 | NA        | FALSE | TRUE  |
| ILMN_1786976 | RAB22A    | TRUE  | TRUE  |
| ILMN_1711408 | ANXA4     | FALSE | FALSE |
| ILMN_1747935 | GOLGB1    | TRUE  | FALSE |
| ILMN_1669390 | PPP1R13L  | FALSE | TRUE  |
| ILMN_2299221 | RABGGTA   | FALSE | FALSE |
| ILMN_1700733 | FAM214A   | FALSE | TRUE  |
| ILMN_1800412 | BMP1      | TRUE  | FALSE |
| ILMN_1787541 | SPSB2     | TRUE  | FALSE |
| ILMN_1750256 | ALS2      | FALSE | FALSE |
| ILMN_1802905 | PIAS4     | FALSE | FALSE |
| ILMN_1810025 | SLC39A2   | FALSE | FALSE |
| ILMN_1781285 | DUSP1     | TRUE  | TRUE  |
| ILMN_1807093 | NA        | FALSE | FALSE |
| ILMN_1768505 | IL13RA1   | FALSE | FALSE |
| ILMN_3244019 | KANK1     | FALSE | FALSE |
| ILMN_2089977 | FKBP9P1   | FALSE | FALSE |

|              |              |       |       |
|--------------|--------------|-------|-------|
| ILMN_3205656 | GAPDH        | FALSE | FALSE |
| ILMN_1757872 | SGK223       | FALSE | FALSE |
| ILMN_2331266 | NUMB         | FALSE | FALSE |
| ILMN_1707475 | UBE2E2       | FALSE | FALSE |
| ILMN_2126957 | NOMO1        | FALSE | FALSE |
| ILMN_1714158 | PON2         | FALSE | FALSE |
| ILMN_1751351 | C6orf132     | FALSE | FALSE |
| ILMN_2375360 | COL4A5       | FALSE | TRUE  |
| ILMN_1769071 | XKRX         | FALSE | FALSE |
| ILMN_1732575 | SEC14L1      | FALSE | FALSE |
| ILMN_1731113 | ZBTB43       | FALSE | FALSE |
| ILMN_1814213 | PQLC3        | FALSE | FALSE |
| ILMN_3204312 | ATP5G1       | FALSE | FALSE |
| ILMN_1706571 | SLC35D2      | TRUE  | FALSE |
| ILMN_1755909 | GID8         | FALSE | TRUE  |
| ILMN_1686906 | TP53INP2     | TRUE  | FALSE |
| ILMN_1738075 | CMIP         | FALSE | FALSE |
| ILMN_1839647 | LINC00323    | FALSE | FALSE |
| ILMN_1747589 | HIST2H2AB    | FALSE | FALSE |
| ILMN_1746588 | TALDO1       | FALSE | FALSE |
| ILMN_1690921 | STAT2        | FALSE | FALSE |
| ILMN_1770977 | TMEM134      | FALSE | TRUE  |
| ILMN_1795937 | EZR          | FALSE | FALSE |
| ILMN_3243598 | PDZK1P2      | FALSE | FALSE |
| ILMN_1681695 | DNASE1L1     | FALSE | FALSE |
| ILMN_1655922 | NA           | FALSE | FALSE |
| ILMN_1701621 | SCO2         | FALSE | FALSE |
| ILMN_1758626 | IDS          | FALSE | FALSE |
| ILMN_1729225 | SORCS2       | TRUE  | TRUE  |
| ILMN_2260991 | TSPO         | FALSE | FALSE |
| ILMN_1752249 | PIEZO1       | FALSE | FALSE |
| ILMN_1791569 | PLXNA1       | TRUE  | TRUE  |
| ILMN_2363058 | PAOX         | FALSE | FALSE |
| ILMN_1787657 | CLDN12       | FALSE | FALSE |
| ILMN_1846771 | NA           | TRUE  | FALSE |
| ILMN_1674151 | NA           | FALSE | FALSE |
| ILMN_2359907 | CD68         | FALSE | FALSE |
| ILMN_3245236 | FBRS         | FALSE | FALSE |
| ILMN_1717674 | PEPD         | TRUE  | FALSE |
| ILMN_1713952 | C1orf106     | FALSE | FALSE |
| ILMN_1659836 | RAET1G       | FALSE | FALSE |
| ILMN_1714527 | VAMP3        | TRUE  | FALSE |
| ILMN_2099783 | ATP6V1F      | FALSE | FALSE |
| ILMN_3263225 | LOC100288911 | FALSE | FALSE |
| ILMN_1673282 | LAMP2        | FALSE | FALSE |
| ILMN_1709549 | PLEKHM1      | FALSE | FALSE |

|              |              |       |       |
|--------------|--------------|-------|-------|
| ILMN_1778202 | NA           | FALSE | FALSE |
| ILMN_1773849 | ATP6V0C      | FALSE | FALSE |
| ILMN_1674759 | LPCAT4       | FALSE | FALSE |
| ILMN_3247452 | OST4         | FALSE | FALSE |
| ILMN_1665877 | RNF149       | FALSE | FALSE |
| ILMN_1781386 | WIPI1        | TRUE  | FALSE |
| ILMN_2184184 | ANXA1        | FALSE | FALSE |
| ILMN_1713688 | DHX32        | FALSE | FALSE |
| ILMN_1695946 | TRNP1        | TRUE  | FALSE |
| ILMN_1724863 | TICAM1       | FALSE | FALSE |
| ILMN_1746928 | TMPRSS11D    | FALSE | FALSE |
| ILMN_3249244 | TMEM106A     | FALSE | FALSE |
| ILMN_2340065 | UBL5         | FALSE | FALSE |
| ILMN_1793770 | DNAJB6       | FALSE | FALSE |
| ILMN_2375992 | SPINT1       | FALSE | FALSE |
| ILMN_1658830 | WBP1L        | TRUE  | FALSE |
| ILMN_2121068 | ADAM17       | FALSE | FALSE |
| ILMN_1679797 | ADARB1       | FALSE | FALSE |
| ILMN_3273229 | LOC100129781 | FALSE | FALSE |
| ILMN_1716913 | TRAPPC1      | FALSE | FALSE |
| ILMN_1659749 | DSP          | FALSE | FALSE |
| ILMN_2096322 | ADIPOR1      | FALSE | FALSE |
| ILMN_1733655 | NA           | FALSE | FALSE |
| ILMN_2337058 | PORCN        | FALSE | FALSE |
| ILMN_1798679 | ANO9         | FALSE | FALSE |
| ILMN_1810962 | PTPRK        | FALSE | FALSE |
| ILMN_1806758 | C9orf85      | FALSE | FALSE |
| ILMN_2380967 | DNASE1L1     | FALSE | FALSE |
| ILMN_1859127 | LOC100129781 | FALSE | FALSE |
| ILMN_1673380 | GNG12        | FALSE | FALSE |
| ILMN_1903021 | NA           | TRUE  | FALSE |
| ILMN_1751627 | TRAPPC3      | FALSE | FALSE |
| ILMN_1698752 | NLRX1        | FALSE | FALSE |
| ILMN_1664016 | ARHGEF18     | FALSE | FALSE |
| ILMN_1718699 | RAP1B        | FALSE | FALSE |
| ILMN_3244157 | SNORD83B     | FALSE | FALSE |
| ILMN_1722798 | PLCD3        | TRUE  | FALSE |
| ILMN_1678729 | SIL1         | FALSE | FALSE |
| ILMN_1670096 | NRBP1        | FALSE | FALSE |
| ILMN_1775883 | IVL          | TRUE  | FALSE |
| ILMN_1775549 | PRSS27       | FALSE | FALSE |
| ILMN_1659753 | LAMP2        | FALSE | FALSE |
| ILMN_2374865 | ATF3         | FALSE | TRUE  |
| ILMN_1797522 | DUSP3        | TRUE  | FALSE |
| ILMN_1662578 | C1GALT1      | FALSE | FALSE |
| ILMN_1752526 | RNF144B      | FALSE | FALSE |



|              |           |       |       |
|--------------|-----------|-------|-------|
| ILMN_1686750 | MGEA5     | FALSE | FALSE |
| ILMN_1730007 | MPZL2     | FALSE | FALSE |
| ILMN_2061950 | RABGAP1   | FALSE | FALSE |
| ILMN_1801043 | GSN       | FALSE | FALSE |
| ILMN_3251145 | LDHA      | FALSE | FALSE |
| ILMN_2406532 | F11R      | FALSE | FALSE |
| ILMN_1733288 | C1RL      | FALSE | FALSE |
| ILMN_1703123 | CSRNP1    | FALSE | TRUE  |
| ILMN_1705922 | BAIAP2    | FALSE | FALSE |
| ILMN_1763447 | PLXNB2    | FALSE | FALSE |
| ILMN_1666924 | PINK1     | FALSE | FALSE |
| ILMN_1702247 | CCNDBP1   | FALSE | FALSE |
| ILMN_1734153 | GDI1      | TRUE  | FALSE |
| ILMN_1777446 | NA        | FALSE | FALSE |
| ILMN_1736939 | UGCG      | FALSE | FALSE |
| ILMN_2316173 | AP1S1     | FALSE | FALSE |
| ILMN_1745079 | TRIM2     | FALSE | FALSE |
| ILMN_3213925 | GPX1      | FALSE | FALSE |
| ILMN_1717234 | CAST      | FALSE | FALSE |
| ILMN_2094166 | CHMP5     | FALSE | FALSE |
| ILMN_1707156 | LRRFIP2   | FALSE | FALSE |
| ILMN_1764230 | GNPTG     | FALSE | FALSE |
| ILMN_1678922 | HERC4     | TRUE  | FALSE |
| ILMN_1812721 | HIP1R     | FALSE | FALSE |
| ILMN_1767111 | ANO10     | FALSE | TRUE  |
| ILMN_2103547 | GOLGA8B   | FALSE | FALSE |
| ILMN_1711208 | CELSR2    | FALSE | FALSE |
| ILMN_2413779 | SEZ6L2    | FALSE | FALSE |
| ILMN_2398159 | DKK3      | FALSE | FALSE |
| ILMN_1762561 | PLA2G10   | FALSE | FALSE |
| ILMN_1693090 | CROT      | FALSE | FALSE |
| ILMN_2401978 | STAT3     | FALSE | FALSE |
| ILMN_1683658 | FKBP1A    | FALSE | FALSE |
| ILMN_1721316 | TNFRSF10A | FALSE | FALSE |
| ILMN_1699022 | ENDOD1    | FALSE | FALSE |
| ILMN_2237428 | SCD5      | FALSE | FALSE |
| ILMN_1682165 | NT5C2     | TRUE  | FALSE |
| ILMN_1815392 | ACTRT1    | FALSE | FALSE |
| ILMN_2046470 | DAAM1     | FALSE | FALSE |
| ILMN_1734184 | PLBD2     | FALSE | FALSE |
| ILMN_2117323 | PIK3C2B   | FALSE | FALSE |
| ILMN_1815578 | ZNF223    | FALSE | FALSE |
| ILMN_2371724 | CEACAM1   | FALSE | FALSE |
| ILMN_1702738 | KLC3      | FALSE | FALSE |
| ILMN_1684211 | SEC14L2   | FALSE | FALSE |
| ILMN_1815319 | CMTM4     | FALSE | FALSE |

|              |          |       |       |
|--------------|----------|-------|-------|
| ILMN_1757072 | FKBP1A   | FALSE | FALSE |
| ILMN_1685934 | UPK2     | FALSE | FALSE |
| ILMN_2347807 | EXOC1    | FALSE | FALSE |
| ILMN_1809437 | RHBDD2   | FALSE | FALSE |
| ILMN_1720053 | ZFAND3   | FALSE | FALSE |
| ILMN_1695285 | CAPN14   | FALSE | FALSE |
| ILMN_1721833 | IER5     | FALSE | FALSE |
| ILMN_1706531 | ABCC5    | FALSE | FALSE |
| ILMN_1774547 | MPRIIP   | FALSE | FALSE |
| ILMN_1721651 | UBE2H    | FALSE | FALSE |
| ILMN_1882590 | NACC2    | FALSE | FALSE |
| ILMN_1701361 | LURAP1L  | FALSE | FALSE |
| ILMN_1853167 | NA       | FALSE | FALSE |
| ILMN_1752927 | FAM160B1 | FALSE | FALSE |
| ILMN_3251550 | PHLDA1   | FALSE | FALSE |
| ILMN_1656902 | HECTD3   | FALSE | FALSE |
| ILMN_3225534 | RNF216P1 | FALSE | FALSE |
| ILMN_3300663 | NA       | FALSE | FALSE |
| ILMN_1674034 | H2AFY    | FALSE | TRUE  |
| ILMN_2374352 | DBNDD1   | FALSE | FALSE |
| ILMN_1674038 | CTSD     | FALSE | FALSE |
| ILMN_2334242 | CREB1    | FALSE | FALSE |
| ILMN_1687035 | ADAMTSL4 | FALSE | FALSE |
| ILMN_1671928 | PROS1    | FALSE | FALSE |
| ILMN_1680579 | ATP2B4   | TRUE  | FALSE |
| ILMN_2095610 | NA       | TRUE  | FALSE |
| ILMN_1698554 | AACS     | FALSE | FALSE |
| ILMN_1660544 | ARRDC4   | FALSE | FALSE |
| ILMN_1738523 | MYD88    | FALSE | FALSE |
| ILMN_1673305 | RHOC     | FALSE | FALSE |
| ILMN_2342066 | METRNL   | FALSE | FALSE |
| ILMN_1671893 | CHMP2A   | FALSE | FALSE |
| ILMN_2359742 | CTSB     | FALSE | FALSE |
| ILMN_1776519 | RAP1GAP  | FALSE | FALSE |
| ILMN_1711994 | TCIRG1   | TRUE  | FALSE |
| ILMN_1691410 | BAMBI    | FALSE | FALSE |
| ILMN_1752968 | LAMB2    | FALSE | FALSE |
| ILMN_2065783 | EXOC2    | FALSE | TRUE  |
| ILMN_2149766 | APPBP2   | FALSE | FALSE |
| ILMN_1653708 | CORO1B   | FALSE | FALSE |
| ILMN_1732534 | CHMP5    | FALSE | FALSE |
| ILMN_1700001 | TCTA     | FALSE | FALSE |
| ILMN_1784364 | STARD5   | FALSE | FALSE |
| ILMN_2399896 | SEC31A   | FALSE | FALSE |
| ILMN_1653220 | PITPNM1  | FALSE | FALSE |
| ILMN_1719696 | PLD1     | FALSE | FALSE |

|              |           |       |       |
|--------------|-----------|-------|-------|
| ILMN_1733937 | MMD       | TRUE  | FALSE |
| ILMN_1798372 | ANXA2P3   | FALSE | FALSE |
| ILMN_1699265 | TNFRSF10B | FALSE | FALSE |
| ILMN_2061318 | TAF13     | FALSE | FALSE |
| ILMN_1772991 | NA        | FALSE | FALSE |
| ILMN_2091347 | IDH1      | FALSE | FALSE |
| ILMN_1740276 | CLDN9     | FALSE | FALSE |
| ILMN_3302499 | IDS       | FALSE | FALSE |
| ILMN_2388605 | ACTR2     | FALSE | FALSE |
| ILMN_1765132 | LACTB     | FALSE | FALSE |
| ILMN_1702127 | SPRR2G    | FALSE | TRUE  |
| ILMN_1805853 | PHLDB3    | FALSE | FALSE |
| ILMN_1719753 | VGLL1     | FALSE | FALSE |
| ILMN_1735052 | ULK1      | TRUE  | FALSE |
| ILMN_1703335 | LACTB     | FALSE | FALSE |
| ILMN_1678454 | CASP4     | TRUE  | TRUE  |
| ILMN_1741371 | TMEM8A    | FALSE | TRUE  |
| ILMN_2387731 | NDUFV3    | FALSE | FALSE |
| ILMN_1795359 | SPRR2A    | FALSE | FALSE |
| ILMN_1782292 | LAMP1     | FALSE | FALSE |
| ILMN_2311761 | AP3S1     | FALSE | FALSE |
| ILMN_1674522 | HIGD1A    | FALSE | FALSE |
| ILMN_2367753 | ATP2B4    | TRUE  | FALSE |
| ILMN_1653828 | CHFR      | FALSE | FALSE |
| ILMN_1737644 | TMEM219   | FALSE | FALSE |
| ILMN_1722834 | RGS12     | TRUE  | FALSE |
| ILMN_1768469 | TCN1      | FALSE | FALSE |
| ILMN_1659564 | SEC61A1   | TRUE  | FALSE |
| ILMN_1746561 | BCL2L2    | TRUE  | FALSE |
| ILMN_1814789 | UBAP2L    | FALSE | FALSE |
| ILMN_1815937 | TMEM184A  | FALSE | FALSE |
| ILMN_2180239 | DOPEY2    | FALSE | FALSE |
| ILMN_1776115 | GSDMA     | FALSE | FALSE |
| ILMN_1682658 | EPM2AIP1  | FALSE | FALSE |
| ILMN_1799098 | NA        | TRUE  | FALSE |
| ILMN_1724700 | RIOK3     | FALSE | FALSE |
| ILMN_1789830 | CFLAR     | FALSE | FALSE |
| ILMN_1721629 | ZNF654    | FALSE | FALSE |
| ILMN_1651438 | ZFPM1     | FALSE | FALSE |
| ILMN_1667418 | TMEM114   | FALSE | FALSE |
| ILMN_1712298 | ANKRD46   | FALSE | FALSE |
| ILMN_1810533 | SLC6A15   | FALSE | FALSE |
| ILMN_2387078 | MPZL2     | FALSE | FALSE |
| ILMN_1763144 | NEU1      | FALSE | FALSE |
| ILMN_2101651 | UBE2G2    | FALSE | FALSE |
| ILMN_1756595 | SH3TC1    | TRUE  | FALSE |

|              |          |       |       |
|--------------|----------|-------|-------|
| ILMN_1797005 | PGLS     | TRUE  | FALSE |
| ILMN_1664750 | TMBIM4   | FALSE | FALSE |
| ILMN_1802799 | AKIRIN1  | FALSE | FALSE |
| ILMN_1769394 | PLCD1    | FALSE | FALSE |
| ILMN_1729987 | SRC      | TRUE  | TRUE  |
| ILMN_1750394 | SLC39A6  | FALSE | FALSE |
| ILMN_2078599 | ACP5     | FALSE | FALSE |
| ILMN_1745148 | ZNFX1    | FALSE | FALSE |
| ILMN_1724959 | SEC31A   | FALSE | FALSE |
| ILMN_1699925 | TGM5     | FALSE | FALSE |
| ILMN_1764508 | PTK6     | FALSE | FALSE |
| ILMN_2373062 | RHBDF2   | FALSE | FALSE |
| ILMN_1771120 | TMEM45B  | FALSE | FALSE |
| ILMN_1705116 | SLC22A23 | FALSE | FALSE |
| ILMN_1751956 | MGST3    | FALSE | FALSE |
| ILMN_1706051 | PLD5     | TRUE  | FALSE |
| ILMN_2353642 | ATP6V0B  | FALSE | FALSE |
| ILMN_1803811 | TRIB1    | FALSE | TRUE  |
| ILMN_1762294 | ADAMTSL4 | FALSE | FALSE |
| ILMN_1692133 | ZNF226   | FALSE | FALSE |
| ILMN_2223903 | PPIC     | FALSE | FALSE |
| ILMN_2152429 | C12orf76 | FALSE | FALSE |
| ILMN_1688322 | ADIPOR1  | FALSE | FALSE |
| ILMN_1680770 | UBQLN2   | FALSE | FALSE |
| ILMN_1668194 | LMTK3    | FALSE | FALSE |
| ILMN_1738921 | ACAA1    | FALSE | FALSE |
| ILMN_1793517 | RASAL1   | FALSE | FALSE |
| ILMN_1685699 | PRSS3    | FALSE | FALSE |
| ILMN_2382505 | SLC22A18 | TRUE  | FALSE |
| ILMN_1696675 | CES2     | FALSE | FALSE |
| ILMN_1743078 | NA       | FALSE | FALSE |
| ILMN_1714082 | CMAS     | FALSE | FALSE |
| ILMN_3176146 | C6orf132 | FALSE | FALSE |
| ILMN_1787308 | PIP4K2C  | TRUE  | FALSE |
| ILMN_2339863 | VPS28    | FALSE | FALSE |
| ILMN_1711699 | HIP1R    | FALSE | FALSE |
| ILMN_1808115 | ATP7A    | FALSE | FALSE |
| ILMN_1796639 | UBQLN3   | FALSE | FALSE |
| ILMN_1721022 | SHC1     | TRUE  | TRUE  |
| ILMN_1719938 | FGF11    | TRUE  | FALSE |
| ILMN_2415179 | CLSTN1   | FALSE | FALSE |
| ILMN_2367233 | ZNF654   | FALSE | FALSE |
| ILMN_1733333 | CALML3   | FALSE | FALSE |
| ILMN_1694147 | PUS3     | FALSE | FALSE |
| ILMN_1691717 | RHBDF2   | FALSE | FALSE |
| ILMN_3237396 | AAGAB    | FALSE | FALSE |

|              |           |       |       |
|--------------|-----------|-------|-------|
| ILMN_2075643 | ANKRD29   | FALSE | FALSE |
| ILMN_1886769 | NA        | FALSE | FALSE |
| ILMN_1658425 | DAG1      | FALSE | TRUE  |
| ILMN_3238452 | FAM21C    | TRUE  | FALSE |
| ILMN_1667460 | SULF2     | FALSE | FALSE |
| ILMN_1788223 | RSPH3     | FALSE | FALSE |
| ILMN_1795826 | ATP6V0D1  | FALSE | FALSE |
| ILMN_2368773 | FAM3C     | FALSE | FALSE |
| ILMN_1671885 | MLF2      | FALSE | FALSE |
| ILMN_1781791 | PRRG1     | FALSE | TRUE  |
| ILMN_1725079 | TSPAN31   | FALSE | TRUE  |
| ILMN_1734288 | DUSP18    | FALSE | FALSE |
| ILMN_2244841 | ALDH4A1   | FALSE | FALSE |
| ILMN_1778242 | CALM1     | FALSE | TRUE  |
| ILMN_1773427 | KANK1     | FALSE | FALSE |
| ILMN_1700310 | NA        | TRUE  | FALSE |
| ILMN_1744471 | ZNF654    | FALSE | FALSE |
| ILMN_1761259 | EXT2      | FALSE | FALSE |
| ILMN_2143566 | SLC39A6   | FALSE | FALSE |
| ILMN_1671600 | EPS8L1    | FALSE | FALSE |
| ILMN_1738237 | HS1BP3    | FALSE | FALSE |
| ILMN_2170595 | RRM2B     | FALSE | FALSE |
| ILMN_1793537 | MUC15     | FALSE | FALSE |
| ILMN_1717165 | IGBP1     | FALSE | FALSE |
| ILMN_2396546 | IGSF3     | FALSE | FALSE |
| ILMN_1719518 | ARF4      | FALSE | FALSE |
| ILMN_1659106 | PHLDA3    | FALSE | FALSE |
| ILMN_2230016 | HIGD1A    | FALSE | FALSE |
| ILMN_2404085 | CLIP1     | FALSE | FALSE |
| ILMN_2214678 | MXD1      | TRUE  | FALSE |
| ILMN_1693630 | VPS9D1    | TRUE  | FALSE |
| ILMN_1750549 | PI4K2A    | FALSE | FALSE |
| ILMN_1694810 | PANX2     | FALSE | FALSE |
| ILMN_1740604 | RAB11FIP5 | FALSE | FALSE |
| ILMN_2362681 | CES2      | FALSE | FALSE |
| ILMN_1890614 | FAM212B   | FALSE | FALSE |
| ILMN_1719972 | PLXNA3    | FALSE | FALSE |
| ILMN_2121816 | GPR137B   | TRUE  | FALSE |
| ILMN_1777325 | STAT1     | FALSE | FALSE |
| ILMN_2164242 | UBE2F     | FALSE | FALSE |
| ILMN_1657495 | MLEC      | FALSE | FALSE |
| ILMN_1717052 | STARD10   | FALSE | FALSE |
| ILMN_2158336 | SH3GLB2   | FALSE | FALSE |
| ILMN_1729288 | C1QTNF6   | FALSE | FALSE |
| ILMN_2153495 | WNT7B     | FALSE | FALSE |
| ILMN_2075927 | STK40     | FALSE | FALSE |

|              |          |       |       |
|--------------|----------|-------|-------|
| ILMN_1699545 | PCSK7    | FALSE | FALSE |
| ILMN_1788540 | PHLDB3   | FALSE | FALSE |
| ILMN_1697694 | ATP6AP1  | FALSE | FALSE |
| ILMN_2151056 | C10orf32 | TRUE  | FALSE |
| ILMN_2301624 | MACF1    | FALSE | FALSE |
| ILMN_1688480 | CCND1    | FALSE | FALSE |
| ILMN_2104106 | XPR1     | FALSE | FALSE |
| ILMN_1712786 | AHCYL2   | FALSE | FALSE |
| ILMN_2232166 | CCDC90B  | FALSE | TRUE  |
| ILMN_1794017 | SERTAD1  | FALSE | FALSE |
| ILMN_1803772 | POLD4    | FALSE | FALSE |
| ILMN_1790471 | CIDECF   | FALSE | FALSE |
| ILMN_1759003 | SNX12    | FALSE | FALSE |
| ILMN_2196588 | NA       | FALSE | FALSE |
| ILMN_2191803 | MYPN     | FALSE | FALSE |
| ILMN_1802706 | IDH3G    | FALSE | FALSE |
| ILMN_1728049 | S100A16  | FALSE | FALSE |
| ILMN_1719661 | MSRB1    | FALSE | FALSE |
| ILMN_1663092 | CITED2   | FALSE | FALSE |
| ILMN_2366864 | JUP      | FALSE | FALSE |
| ILMN_1730660 | LGALS3   | TRUE  | FALSE |
| ILMN_1760792 | KLHL7    | FALSE | FALSE |
| ILMN_1815012 | EXOC7    | TRUE  | FALSE |
| ILMN_1753472 | SUMF1    | FALSE | FALSE |
| ILMN_1755937 | ANXA2    | FALSE | FALSE |
| ILMN_1675640 | OAS1     | FALSE | TRUE  |
| ILMN_1782331 | NA       | FALSE | FALSE |
| ILMN_1800341 | WDR66    | FALSE | FALSE |
| ILMN_1698243 | C1orf85  | FALSE | FALSE |
| ILMN_2374159 | HERPUD1  | FALSE | FALSE |
| ILMN_1676611 | PHPT1    | FALSE | FALSE |
| ILMN_1735156 | SLC4A11  | FALSE | TRUE  |
| ILMN_1795711 | LCE2B    | FALSE | TRUE  |
| ILMN_1708016 | FAM210B  | FALSE | FALSE |
| ILMN_1719343 | WDR26    | FALSE | FALSE |
| ILMN_1811574 | MAPK8IP3 | TRUE  | FALSE |
| ILMN_3235171 | CCDC64B  | FALSE | FALSE |
| ILMN_1726516 | SCRIB    | FALSE | FALSE |
| ILMN_1765578 | TIPARP   | FALSE | FALSE |
| ILMN_1789095 | BMPR2    | FALSE | FALSE |
| ILMN_1694530 | DDA1     | FALSE | FALSE |
| ILMN_2111932 | SERINC2  | FALSE | FALSE |
| ILMN_2233454 | SPTLC3   | FALSE | FALSE |
| ILMN_1742534 | COL4A5   | FALSE | FALSE |
| ILMN_1749044 | PVRL4    | FALSE | FALSE |
| ILMN_1749834 | SMIM1    | FALSE | FALSE |

|              |          |       |       |
|--------------|----------|-------|-------|
| ILMN_1791826 | RAB25    | FALSE | FALSE |
| ILMN_1725241 | GSTK1    | FALSE | FALSE |
| ILMN_1793859 | ALDH2    | FALSE | FALSE |
| ILMN_1671565 | RNASET2  | FALSE | FALSE |
| ILMN_1737988 | PRNP     | FALSE | FALSE |
| ILMN_1779828 | EDEM1    | FALSE | FALSE |
| ILMN_1804117 | FAM89B   | FALSE | FALSE |
| ILMN_3284114 | CAP1     | FALSE | FALSE |
| ILMN_1775522 | MAGED1   | TRUE  | TRUE  |
| ILMN_1769550 | SLFN5    | FALSE | FALSE |
| ILMN_1685312 | NA       | FALSE | FALSE |
| ILMN_1722025 | CPEB4    | FALSE | FALSE |
| ILMN_1749109 | PSAP     | TRUE  | FALSE |
| ILMN_1803810 | RRBP1    | FALSE | FALSE |
| ILMN_2407389 | GNMB     | FALSE | TRUE  |
| ILMN_1741970 | JUP      | FALSE | FALSE |
| ILMN_2382717 | OPN3     | FALSE | FALSE |
| ILMN_1729453 | TSPAN9   | FALSE | FALSE |
| ILMN_1699071 | MAP3K7CL | FALSE | FALSE |
| ILMN_1737561 | N4BP2L2  | TRUE  | FALSE |
| ILMN_3237385 | NRBF2    | TRUE  | FALSE |
| ILMN_2380688 | B4GALT4  | FALSE | FALSE |
| ILMN_1680223 | PNPLA8   | FALSE | FALSE |
| ILMN_1677440 | ATP6AP2  | TRUE  | FALSE |
| ILMN_1804901 | IL36RN   | FALSE | FALSE |
| ILMN_2361400 | ABCA12   | FALSE | FALSE |
| ILMN_2393712 | CTTN     | FALSE | FALSE |
| ILMN_1723035 | OLR1     | FALSE | FALSE |
| ILMN_2151441 | FAM103A1 | FALSE | FALSE |
| ILMN_1697597 | EFCAB14  | FALSE | FALSE |
| ILMN_1805410 | C15orf48 | FALSE | FALSE |
| ILMN_1741392 | SLC25A20 | FALSE | FALSE |
| ILMN_2169025 | JOSD2    | FALSE | FALSE |
| ILMN_1765258 | HLA-E    | TRUE  | FALSE |
| ILMN_1745256 | NA       | FALSE | FALSE |
| ILMN_1743396 | ACOX3    | FALSE | FALSE |
| ILMN_1803211 | FBXO2    | FALSE | FALSE |
| ILMN_1758852 | ENTPD7   | FALSE | FALSE |
| ILMN_1708223 | PAK6     | FALSE | FALSE |
| ILMN_1679311 | STK40    | FALSE | FALSE |
| ILMN_2330787 | FRMD6    | FALSE | FALSE |
| ILMN_1664802 | WSB1     | FALSE | FALSE |
| ILMN_1796177 | GIPC1    | FALSE | FALSE |
| ILMN_1731353 | CHPF     | FALSE | FALSE |
| ILMN_1759676 | HOXC13   | FALSE | FALSE |
| ILMN_2097793 | ZBTB4    | FALSE | FALSE |

|              |          |       |       |
|--------------|----------|-------|-------|
| ILMN_1766221 | B4GALT1  | FALSE | FALSE |
| ILMN_1682938 | ARF3     | FALSE | FALSE |
| ILMN_1773389 | PLTP     | FALSE | FALSE |
| ILMN_2343278 | PPAP2A   | FALSE | FALSE |
| ILMN_2390974 | DNAJB2   | TRUE  | FALSE |
| ILMN_1783287 | S100A14  | FALSE | FALSE |
| ILMN_1661799 | HIGD1A   | FALSE | FALSE |
| ILMN_2342033 | F11R     | FALSE | FALSE |
| ILMN_3227263 | SLC22A23 | FALSE | TRUE  |
| ILMN_1778087 | NA       | TRUE  | FALSE |
| ILMN_1714861 | CD68     | FALSE | FALSE |
| ILMN_1800512 | HMOX1    | FALSE | FALSE |
| ILMN_1807972 | MICAL1   | FALSE | FALSE |
| ILMN_1814966 | PIAS3    | FALSE | TRUE  |
| ILMN_2113535 | PCYOX1   | FALSE | FALSE |
| ILMN_1764361 | DUSP16   | FALSE | FALSE |
| ILMN_3241870 | FRMD8    | FALSE | FALSE |
| ILMN_1698666 | CST6     | FALSE | FALSE |
| ILMN_1739450 | NFE2L1   | TRUE  | FALSE |
| ILMN_2376822 | NA       | FALSE | FALSE |
| ILMN_2352131 | ERBB2    | FALSE | FALSE |
| ILMN_3247578 | FAT1     | FALSE | FALSE |
| ILMN_1779677 | ZCCHC6   | TRUE  | FALSE |
| ILMN_1800739 | SPINT2   | FALSE | FALSE |
| ILMN_1715715 | CEBPA    | FALSE | FALSE |
| ILMN_2355559 | PSAP     | TRUE  | FALSE |
| ILMN_1760556 | NA       | FALSE | FALSE |
| ILMN_2277676 | ERCC1    | FALSE | FALSE |
| ILMN_1732066 | CKMT1A   | FALSE | FALSE |
| ILMN_1778360 | PYGB     | TRUE  | TRUE  |
| ILMN_1716249 | OR1K1    | FALSE | FALSE |
| ILMN_1656194 | TSPAN10  | FALSE | TRUE  |
| ILMN_3251605 | KLHL28   | FALSE | FALSE |
| ILMN_1794677 | TMC6     | FALSE | FALSE |
| ILMN_2188722 | NA       | FALSE | FALSE |
| ILMN_1697548 | LPHN2    | FALSE | FALSE |
| ILMN_1733248 | NRBP2    | FALSE | FALSE |
| ILMN_1744534 | LYRM5    | FALSE | FALSE |
| ILMN_1716988 | OPN3     | FALSE | TRUE  |
| ILMN_1670145 | DFNA5    | FALSE | FALSE |
| ILMN_2071809 | MGP      | FALSE | FALSE |
| ILMN_1796094 | CD36     | FALSE | FALSE |
| ILMN_1684653 | GPR115   | FALSE | FALSE |
| ILMN_1720303 | OSTM1    | FALSE | FALSE |
| ILMN_1754795 | FAT1     | FALSE | FALSE |
| ILMN_3307874 | AIM1L    | FALSE | FALSE |



|              |          |       |       |
|--------------|----------|-------|-------|
| ILMN_1810420 | DYSF     | FALSE | FALSE |
| ILMN_1727479 | TPRG1L   | TRUE  | FALSE |
| ILMN_1803838 | CNFN     | FALSE | FALSE |
| ILMN_2390586 | SP100    | FALSE | TRUE  |
| ILMN_1656938 | SLC37A2  | FALSE | FALSE |
| ILMN_1795963 | OSGIN1   | FALSE | FALSE |
| ILMN_1712577 | FAM174A  | FALSE | FALSE |
| ILMN_1651429 | SELM     | FALSE | FALSE |
| ILMN_1810560 | NUPR1    | FALSE | TRUE  |
| ILMN_1770454 | AGRN     | TRUE  | FALSE |
| ILMN_1679725 | PCYOX1   | FALSE | FALSE |
| ILMN_1673769 | KCNG1    | FALSE | FALSE |
| ILMN_1765109 | TNFRSF25 | TRUE  | FALSE |
| ILMN_1677200 | CYFIP2   | FALSE | FALSE |
| ILMN_2375484 | CPEB2    | FALSE | FALSE |
| ILMN_1769810 | ARL6IP5  | FALSE | FALSE |
| ILMN_1735365 | GJB5     | FALSE | FALSE |
| ILMN_2394250 | PLEKHA1  | FALSE | FALSE |
| ILMN_2322806 | CAST     | FALSE | FALSE |
| ILMN_1746917 | NA       | FALSE | FALSE |
| ILMN_1753468 | CD63     | FALSE | FALSE |
| ILMN_3245194 | NA       | FALSE | FALSE |
| ILMN_2133675 | SGSH     | FALSE | FALSE |
| ILMN_1749011 | NECAP2   | FALSE | FALSE |
| ILMN_1810289 | MYOF     | FALSE | FALSE |
| ILMN_1898723 | NA       | FALSE | FALSE |
| ILMN_1705144 | ULK1     | FALSE | FALSE |
| ILMN_1813704 | CEMIP    | FALSE | FALSE |
| ILMN_1788250 | LDOC1    | FALSE | FALSE |
| ILMN_1721127 | HIST1H3D | FALSE | FALSE |
| ILMN_2401779 | FAM102A  | FALSE | FALSE |
| ILMN_1777915 | STX6     | FALSE | FALSE |
| ILMN_2404135 | RIOK3    | FALSE | FALSE |
| ILMN_1810852 | LAMC1    | FALSE | FALSE |
| ILMN_1739594 | ACOT11   | FALSE | FALSE |
| ILMN_1718960 | SERPINB8 | FALSE | FALSE |
| ILMN_1653283 | APP      | TRUE  | FALSE |
| ILMN_1714820 | ITGB1    | FALSE | FALSE |
| ILMN_1900520 | NA       | FALSE | FALSE |
| ILMN_1768510 | MAN2B2   | FALSE | FALSE |
| ILMN_1808501 | SH3KBP1  | FALSE | FALSE |
| ILMN_1669820 | NA       | FALSE | FALSE |
| ILMN_1794914 | UBTD1    | TRUE  | FALSE |
| ILMN_1659027 | SLC2A1   | FALSE | FALSE |
| ILMN_2381697 | P4HA2    | FALSE | FALSE |
| ILMN_1717326 | SLC29A3  | TRUE  | FALSE |

|              |          |       |       |
|--------------|----------|-------|-------|
| ILMN_2349138 | CDC42SE1 | FALSE | FALSE |
| ILMN_1708728 | H2AFJ    | FALSE | FALSE |
| ILMN_1803824 | ZDHHC9   | FALSE | FALSE |
| ILMN_1702835 | SH3BGRL  | FALSE | TRUE  |
| ILMN_1804329 | TUSC2    | FALSE | TRUE  |
| ILMN_2064150 | PRRG2    | FALSE | FALSE |
| ILMN_1675612 | BLCAP    | FALSE | TRUE  |
| ILMN_1660021 | PLIN3    | FALSE | FALSE |
| ILMN_1704753 | EPAS1    | FALSE | FALSE |
| ILMN_1746396 | CTNNB1   | FALSE | FALSE |
| ILMN_1724533 | LY96     | FALSE | FALSE |
| ILMN_1757350 | CTNNB1   | FALSE | FALSE |
| ILMN_1746618 | PAQR7    | FALSE | FALSE |
| ILMN_1725912 | KLK12    | FALSE | FALSE |
| ILMN_3309349 | SNHG8    | FALSE | FALSE |
| ILMN_1778625 | CD44     | FALSE | FALSE |
| ILMN_1778575 | WNT7A    | FALSE | FALSE |
| ILMN_1802053 | ZNF91    | FALSE | FALSE |
| ILMN_1677396 | NDFIP2   | FALSE | FALSE |
| ILMN_1701173 | KCNK6    | FALSE | FALSE |
| ILMN_1757644 | UBE2H    | FALSE | FALSE |
| ILMN_1801610 | METRNL   | FALSE | FALSE |
| ILMN_1767816 | APH1B    | FALSE | FALSE |
| ILMN_1730611 | RTN4     | FALSE | FALSE |
| ILMN_1763520 | SULT2B1  | FALSE | FALSE |
| ILMN_1674367 | SPRR2F   | FALSE | FALSE |
| ILMN_1787251 | DAAM1    | FALSE | FALSE |
| ILMN_1810785 | RNF11    | FALSE | FALSE |
| ILMN_1655429 | TNFAIP1  | FALSE | FALSE |
| ILMN_2383611 | PTPRE    | FALSE | FALSE |
| ILMN_1711566 | TIMP1    | FALSE | FALSE |
| ILMN_1701731 | AKR1B1   | FALSE | TRUE  |
| ILMN_1802603 | RFNG     | FALSE | FALSE |
| ILMN_1790807 | XPC      | FALSE | FALSE |
| ILMN_2299612 | TMEM150A | FALSE | FALSE |
| ILMN_1665982 | AKTIP    | FALSE | FALSE |
| ILMN_1703433 | NA       | FALSE | FALSE |
| ILMN_1780711 | NA       | FALSE | FALSE |
| ILMN_1750785 | SYTL1    | FALSE | FALSE |
| ILMN_1660624 | LIMK2    | FALSE | FALSE |
| ILMN_1802888 | ZNF185   | FALSE | FALSE |
| ILMN_2190084 | VAMP8    | FALSE | FALSE |
| ILMN_1708341 | PDZK1    | FALSE | FALSE |
| ILMN_1712748 | GSKIP    | FALSE | FALSE |
| ILMN_1672124 | FAM198B  | FALSE | FALSE |
| ILMN_2370976 | MYOF     | FALSE | FALSE |

|              |           |       |       |
|--------------|-----------|-------|-------|
| ILMN_2328029 | EXT2      | FALSE | FALSE |
| ILMN_1714710 | CCDC120   | TRUE  | FALSE |
| ILMN_2075800 | PTK6      | FALSE | FALSE |
| ILMN_1723843 | CSNK2A2   | TRUE  | FALSE |
| ILMN_1798030 | XPR1      | FALSE | FALSE |
| ILMN_3289745 | NA        | FALSE | FALSE |
| ILMN_2317543 | ITGB4     | FALSE | FALSE |
| ILMN_3236481 | HIGD1A    | FALSE | FALSE |
| ILMN_1708143 | FAM127A   | FALSE | FALSE |
| ILMN_2345142 | SULF2     | FALSE | FALSE |
| ILMN_1805693 | GMIP      | FALSE | FALSE |
| ILMN_1658469 | TP53TG1   | FALSE | FALSE |
| ILMN_1705064 | NDEL1     | FALSE | FALSE |
| ILMN_1764380 | GLTP      | FALSE | FALSE |
| ILMN_2329735 | ECM1      | FALSE | FALSE |
| ILMN_1669433 | ZSWIM8    | TRUE  | FALSE |
| ILMN_2102960 | FAM214A   | FALSE | TRUE  |
| ILMN_1717262 | PROCR     | FALSE | FALSE |
| ILMN_3263099 | NA        | FALSE | FALSE |
| ILMN_1688295 | ZNF219    | TRUE  | FALSE |
| ILMN_2333367 | FKBP1A    | FALSE | FALSE |
| ILMN_2399174 | TRAK1     | FALSE | FALSE |
| ILMN_1809344 | BTBD10    | TRUE  | FALSE |
| ILMN_2397028 | SERPINB8  | FALSE | FALSE |
| ILMN_1777170 | FAM183A   | FALSE | FALSE |
| ILMN_1737653 | KRT78     | FALSE | FALSE |
| ILMN_1791912 | SIDT2     | TRUE  | FALSE |
| ILMN_1706013 | FTH1      | FALSE | FALSE |
| ILMN_1791147 | YPEL3     | FALSE | FALSE |
| ILMN_3307729 | CXXC5     | FALSE | FALSE |
| ILMN_1754842 | DLGAP4    | TRUE  | TRUE  |
| ILMN_1664265 | EPHA1     | FALSE | FALSE |
| ILMN_1787567 | TSC22D1   | FALSE | FALSE |
| ILMN_1759513 | RND3      | TRUE  | TRUE  |
| ILMN_1687947 | HIST1H2BE | FALSE | FALSE |
| ILMN_1696360 | CTSB      | FALSE | FALSE |
| ILMN_1683146 | FTH1      | FALSE | FALSE |
| ILMN_1651958 | MGP       | FALSE | FALSE |
| ILMN_2095597 | CDH16     | FALSE | FALSE |
| ILMN_1786470 | C1orf74   | FALSE | FALSE |
| ILMN_1700690 | VAT1      | FALSE | FALSE |
| ILMN_3307841 | AGR2      | FALSE | FALSE |
| ILMN_1723884 | ARF4      | FALSE | FALSE |
| ILMN_1695246 | KLHDC8B   | FALSE | FALSE |
| ILMN_1696099 | ALDH4A1   | FALSE | FALSE |
| ILMN_1762284 | ASPRV1    | FALSE | TRUE  |

|              |          |       |       |
|--------------|----------|-------|-------|
| ILMN_1757660 | CAPS     | FALSE | FALSE |
| ILMN_1759792 | CLIP4    | FALSE | FALSE |
| ILMN_2252160 | UBC      | FALSE | FALSE |
| ILMN_1718387 | LOR      | FALSE | TRUE  |
| ILMN_2133205 | GPX2     | TRUE  | FALSE |
| ILMN_1739840 | LRRC8A   | FALSE | FALSE |
| ILMN_1790797 | VPS28    | FALSE | FALSE |
| ILMN_1815445 | IDS      | FALSE | FALSE |
| ILMN_2125346 | MUC16    | TRUE  | FALSE |
| ILMN_2098418 | GATSL3   | FALSE | FALSE |
| ILMN_2070896 | BMPR2    | FALSE | FALSE |
| ILMN_1658094 | ZNF365   | FALSE | FALSE |
| ILMN_2313901 | PAM      | FALSE | FALSE |
| ILMN_1812441 | FAM222B  | TRUE  | TRUE  |
| ILMN_1793017 | DGKQ     | TRUE  | FALSE |
| ILMN_1800626 | SESN1    | FALSE | FALSE |
| ILMN_1779648 | HIST3H2A | FALSE | FALSE |
| ILMN_1704369 | LIMA1    | FALSE | FALSE |
| ILMN_3248591 | LTBP2    | FALSE | FALSE |
| ILMN_1730906 | FILIP1L  | FALSE | TRUE  |
| ILMN_1784523 | ATP6V1G1 | FALSE | FALSE |
| ILMN_1690017 | SPINK5   | TRUE  | FALSE |
| ILMN_3202024 | FTL      | FALSE | FALSE |
| ILMN_1696494 | CMTM6    | FALSE | FALSE |
| ILMN_2377240 | AKTIP    | FALSE | FALSE |
| ILMN_1737308 | GLRX     | FALSE | FALSE |
| ILMN_1714567 | AHNAK    | FALSE | FALSE |
| ILMN_1801205 | GPNMB    | FALSE | TRUE  |
| ILMN_1744268 | PLEC     | TRUE  | FALSE |
| ILMN_1739001 | TACSTD2  | FALSE | FALSE |
| ILMN_2134974 | RAB38    | TRUE  | FALSE |
| ILMN_2198413 | MYEOV    | FALSE | FALSE |
| ILMN_1733811 | JUP      | FALSE | FALSE |
| ILMN_1691572 | TST      | FALSE | FALSE |
| ILMN_1803197 | RAB3IP   | FALSE | FALSE |
| ILMN_2061435 | MEG3     | FALSE | FALSE |
| ILMN_2234526 | NA       | FALSE | FALSE |
| ILMN_1764654 | NA       | FALSE | FALSE |
| ILMN_1798303 | NA       | FALSE | FALSE |
| ILMN_1751464 | TNFSF9   | FALSE | TRUE  |
| ILMN_1698231 | RRM2B    | FALSE | FALSE |
| ILMN_3307782 | FBXL18   | FALSE | FALSE |
| ILMN_2232854 | FAP      | FALSE | FALSE |
| ILMN_1678692 | MPRIP    | FALSE | FALSE |
| ILMN_1775587 | STX19    | FALSE | FALSE |
| ILMN_3233442 | RPL13A   | FALSE | FALSE |

|              |         |       |       |
|--------------|---------|-------|-------|
| ILMN_2370872 | GRINA   | FALSE | FALSE |
| ILMN_1656910 | TRIM6   | FALSE | FALSE |
| ILMN_2116127 | NPEPPS  | FALSE | FALSE |
| ILMN_1690289 | DUOX1   | TRUE  | FALSE |
| ILMN_1745471 | IRF9    | FALSE | TRUE  |
| ILMN_2340721 | TMEM134 | FALSE | TRUE  |
| ILMN_1695435 | NA      | FALSE | FALSE |
| ILMN_2327860 | MAL     | FALSE | FALSE |
| ILMN_1798006 | ANKRD35 | TRUE  | FALSE |
| ILMN_2044453 | LPAR5   | FALSE | FALSE |
| ILMN_1713636 | S100A6  | FALSE | FALSE |
| ILMN_1705213 | TMBIM1  | TRUE  | FALSE |
| ILMN_1766054 | ABCA1   | TRUE  | FALSE |
| ILMN_1659029 | DENND6B | FALSE | FALSE |
| ILMN_1881081 | NA      | FALSE | FALSE |
| ILMN_2051684 | C4orf3  | FALSE | FALSE |
| ILMN_1712678 | RPS27L  | FALSE | FALSE |
| ILMN_1815024 | PRDX5   | TRUE  | TRUE  |
| ILMN_1796461 | PRSS8   | FALSE | FALSE |
| ILMN_1699243 | MSMB    | FALSE | FALSE |
| ILMN_3305614 | ZNF812  | TRUE  | FALSE |
| ILMN_1683969 | FKBP1A  | FALSE | FALSE |
| ILMN_1698766 | PYCARD  | FALSE | FALSE |
| ILMN_1757351 | S100A7  | FALSE | FALSE |
| ILMN_2392274 | CD82    | FALSE | FALSE |
| ILMN_2061446 | NCEH1   | FALSE | FALSE |
| ILMN_1692177 | TSC22D1 | FALSE | FALSE |
| ILMN_1867664 | SPTLC3  | FALSE | FALSE |
| ILMN_3247261 | RAPGEF2 | FALSE | FALSE |
| ILMN_2186983 | ANXA8L1 | TRUE  | FALSE |
| ILMN_1670844 | OPN3    | FALSE | FALSE |
| ILMN_1755727 | KDM5B   | FALSE | FALSE |
| ILMN_2377496 | ERCC1   | FALSE | FALSE |
| ILMN_1720282 | NQO1    | FALSE | FALSE |
| ILMN_2278335 | AKR1B15 | FALSE | FALSE |
| ILMN_1826921 | NA      | FALSE | FALSE |
| ILMN_1666976 | PLD3    | FALSE | FALSE |
| ILMN_1797310 | ATP6V1D | FALSE | FALSE |
| ILMN_1782069 | TRAK1   | FALSE | FALSE |
| ILMN_1790227 | IGFL2   | TRUE  | FALSE |
| ILMN_1747546 | TSPAN1  | FALSE | FALSE |
| ILMN_1751708 | ITM2B   | TRUE  | FALSE |
| ILMN_2243687 | LAMP2   | FALSE | FALSE |
| ILMN_1737426 | PCMTD1  | FALSE | TRUE  |
| ILMN_1727288 | EVPL    | FALSE | FALSE |
| ILMN_1814106 | CYSRT1  | FALSE | FALSE |

|              |          |       |       |
|--------------|----------|-------|-------|
| ILMN_1672004 | TOB1     | FALSE | TRUE  |
| ILMN_1729234 | TPP1     | FALSE | FALSE |
| ILMN_1682929 | SYTL2    | FALSE | FALSE |
| ILMN_1745964 | IRAK2    | FALSE | FALSE |
| ILMN_1799105 | COL17A1  | TRUE  | FALSE |
| ILMN_1807169 | TINAGL1  | FALSE | FALSE |
| ILMN_2129505 | CYB561A3 | FALSE | FALSE |
| ILMN_1761946 | PROM2    | TRUE  | FALSE |
| ILMN_1690040 | TM7SF2   | FALSE | FALSE |
| ILMN_1784661 | TMEM2    | FALSE | FALSE |
| ILMN_1803788 | LGALS3   | FALSE | FALSE |
| ILMN_1676278 | ABCC2    | FALSE | FALSE |
| ILMN_1666546 | DUSP14   | FALSE | FALSE |
| ILMN_1679428 | CHIC2    | FALSE | FALSE |
| ILMN_1791792 | C12orf5  | FALSE | FALSE |
| ILMN_3237991 | NA       | FALSE | FALSE |
| ILMN_2124187 | TSC22D2  | FALSE | FALSE |
| ILMN_1670272 | LRP10    | FALSE | FALSE |
| ILMN_1704294 | CDH3     | FALSE | FALSE |
| ILMN_1808404 | RHBDF1   | FALSE | FALSE |
| ILMN_1729237 | CYB5R1   | FALSE | FALSE |
| ILMN_1701461 | TIMP3    | FALSE | FALSE |
| ILMN_1701239 | SPRR2E   | FALSE | FALSE |
| ILMN_1750101 | S100A11  | FALSE | FALSE |
| ILMN_1803429 | CD44     | FALSE | FALSE |
| ILMN_2408576 | FAM129B  | FALSE | FALSE |
| ILMN_1679133 | SERPINB1 | FALSE | FALSE |
| ILMN_1748352 | CTSV     | TRUE  | FALSE |
| ILMN_2089167 | RHOD     | FALSE | FALSE |
| ILMN_2320330 | MAL      | FALSE | FALSE |
| ILMN_1666122 | HEG1     | FALSE | FALSE |
| ILMN_2221046 | GM2A     | FALSE | FALSE |
| ILMN_1913510 | NA       | FALSE | TRUE  |
| ILMN_1795342 | MLPH     | FALSE | FALSE |
| ILMN_1781374 | TUFT1    | FALSE | FALSE |
| ILMN_1782141 | GRHL3    | FALSE | FALSE |
| ILMN_1667081 | CCND2    | FALSE | FALSE |
| ILMN_1667948 | SPATA18  | FALSE | FALSE |
| ILMN_1688103 | CTNNBIP1 | TRUE  | FALSE |
| ILMN_1659544 | STX3     | FALSE | FALSE |
| ILMN_1803018 | KIFC2    | TRUE  | FALSE |
| ILMN_1809783 | FAM25A   | FALSE | FALSE |
| ILMN_1682599 | GPRC5A   | FALSE | FALSE |
| ILMN_1811702 | GRN      | FALSE | FALSE |
| ILMN_1658926 | NOTCH3   | FALSE | FALSE |
| ILMN_1747759 | NA       | FALSE | FALSE |

|              |          |       |       |
|--------------|----------|-------|-------|
| ILMN_3238676 | ULBP2    | FALSE | FALSE |
| ILMN_2334210 | ITGB4    | FALSE | FALSE |
| ILMN_2145116 | TMEM173  | FALSE | FALSE |
| ILMN_1710622 | DUOXA1   | TRUE  | FALSE |
| ILMN_2360415 | PRNP     | FALSE | FALSE |
| ILMN_1655614 | DSP      | FALSE | FALSE |
| ILMN_1685574 | TSC22D2  | FALSE | FALSE |
| ILMN_1754576 | KRT6C    | FALSE | FALSE |
| ILMN_1673356 | FAM83C   | FALSE | FALSE |
| ILMN_2228732 | CCNG2    | FALSE | FALSE |
| ILMN_1796490 | GRINA    | FALSE | FALSE |
| ILMN_1710325 | SCEL     | FALSE | FALSE |
| ILMN_1655468 | DSG3     | FALSE | FALSE |
| ILMN_1713638 | NIPAL4   | FALSE | FALSE |
| ILMN_2207363 | RABAC1   | FALSE | FALSE |
| ILMN_2150465 | C5orf28  | FALSE | FALSE |
| ILMN_1721732 | GSDMC    | FALSE | FALSE |
| ILMN_1804663 | THBS3    | FALSE | FALSE |
| ILMN_1780861 | NA       | FALSE | FALSE |
| ILMN_1758272 | MYPN     | FALSE | FALSE |
| ILMN_1674609 | CLTB     | FALSE | FALSE |
| ILMN_2149971 | SPINK6   | FALSE | FALSE |
| ILMN_1667626 | EGLN3    | FALSE | FALSE |
| ILMN_1655261 | ERP27    | FALSE | FALSE |
| ILMN_2062468 | IGFBP7   | FALSE | FALSE |
| ILMN_2169439 | ITGAV    | FALSE | FALSE |
| ILMN_2380418 | BICD2    | FALSE | FALSE |
| ILMN_1699809 | CAPNS2   | FALSE | FALSE |
| ILMN_2134538 | FTH1     | FALSE | FALSE |
| ILMN_2073235 | FTH1     | FALSE | FALSE |
| ILMN_1716815 | CEACAM1  | FALSE | FALSE |
| ILMN_1653161 | SNCG     | FALSE | FALSE |
| ILMN_1792265 | TRIM4    | FALSE | FALSE |
| ILMN_2313730 | RHOC     | TRUE  | FALSE |
| ILMN_1684873 | ARSD     | FALSE | TRUE  |
| ILMN_2073446 | C1orf116 | FALSE | FALSE |
| ILMN_1746525 | FTH1     | FALSE | FALSE |
| ILMN_1790228 | FURIN    | FALSE | FALSE |
| ILMN_1750278 | FTH1     | FALSE | FALSE |
| ILMN_1785852 | NABP1    | FALSE | FALSE |
| ILMN_2309156 | PMEPA1   | FALSE | TRUE  |
| ILMN_2184612 | C3orf52  | FALSE | FALSE |
| ILMN_2232463 | ARL14    | FALSE | FALSE |
| ILMN_2319910 | DGKA     | TRUE  | FALSE |
| ILMN_1698772 | NA       | FALSE | FALSE |
| ILMN_1651832 | EHD1     | FALSE | FALSE |

|              |           |       |       |
|--------------|-----------|-------|-------|
| ILMN_2344373 | MVP       | FALSE | FALSE |
| ILMN_1704353 | IGSF3     | FALSE | FALSE |
| ILMN_1700268 | QPRT      | FALSE | FALSE |
| ILMN_1684306 | S100A4    | FALSE | FALSE |
| ILMN_1774901 | GDPD3     | FALSE | FALSE |
| ILMN_1663454 | PKP1      | TRUE  | FALSE |
| ILMN_1725312 | RASA1     | FALSE | FALSE |
| ILMN_2376313 | MSMB      | FALSE | FALSE |
| ILMN_1723912 | IFI44L    | FALSE | FALSE |
| ILMN_1764690 | NTS       | FALSE | FALSE |
| ILMN_2381257 | DSC2      | FALSE | FALSE |
| ILMN_1724250 | GRN       | FALSE | FALSE |
| ILMN_1695924 | KLK11     | FALSE | FALSE |
| ILMN_2358919 | TP53I3    | FALSE | FALSE |
| ILMN_2384122 | GPR56     | FALSE | FALSE |
| ILMN_1790906 | MSMB      | FALSE | FALSE |
| ILMN_2167416 | MR1       | FALSE | TRUE  |
| ILMN_1698100 | ANXA2P1   | FALSE | FALSE |
| ILMN_1699695 | TNFRSF21  | FALSE | FALSE |
| ILMN_2180885 | CWH43     | FALSE | FALSE |
| ILMN_1738558 | RGS20     | FALSE | FALSE |
| ILMN_1661500 | B4GALT4   | FALSE | FALSE |
| ILMN_2348788 | CD44      | FALSE | FALSE |
| ILMN_1795778 | P4HA2     | FALSE | FALSE |
| ILMN_3243644 | RNA28S5   | FALSE | FALSE |
| ILMN_1711069 | YPEL5     | TRUE  | FALSE |
| ILMN_1803236 | CLCA2     | FALSE | FALSE |
| ILMN_1781010 | ARHGEF3   | FALSE | FALSE |
| ILMN_1771261 | SYNC      | FALSE | FALSE |
| ILMN_1737163 | SH3BGRL3  | FALSE | FALSE |
| ILMN_1676336 | NCEH1     | FALSE | FALSE |
| ILMN_1652280 | FBXO32    | FALSE | FALSE |
| ILMN_2173835 | FTH1P3    | FALSE | FALSE |
| ILMN_2384745 | PSG4      | FALSE | FALSE |
| ILMN_1757406 | HIST1H1C  | FALSE | FALSE |
| ILMN_1744937 | PTPRM     | FALSE | FALSE |
| ILMN_1776936 | KANK4     | FALSE | TRUE  |
| ILMN_2353633 | EMR2      | FALSE | FALSE |
| ILMN_1661743 | LINC00263 | FALSE | FALSE |
| ILMN_2411282 | QSOX1     | FALSE | FALSE |
| ILMN_1793118 | TAX1BP1   | FALSE | FALSE |
| ILMN_1718268 | GJB4      | FALSE | FALSE |
| ILMN_1687384 | IFI6      | FALSE | FALSE |
| ILMN_3241234 | S100A11   | FALSE | FALSE |
| ILMN_1712095 | FOXO4     | FALSE | FALSE |
| ILMN_2136495 | A2ML1     | FALSE | FALSE |



|              |          |       |       |
|--------------|----------|-------|-------|
| ILMN_1655077 | PRDM1    | FALSE | TRUE  |
| ILMN_1756541 | MXD4     | TRUE  | FALSE |
| ILMN_1676213 | SRPX2    | FALSE | FALSE |
| ILMN_2132599 | ANKRD22  | FALSE | FALSE |
| ILMN_1838767 | NA       | FALSE | FALSE |
| ILMN_1656368 | ALDH4A1  | FALSE | FALSE |
| ILMN_1676563 | HTRA1    | FALSE | FALSE |
| ILMN_3183838 | FAM25A   | FALSE | FALSE |
| ILMN_1705107 | NA       | TRUE  | FALSE |
| ILMN_2415748 | WSB1     | FALSE | FALSE |
| ILMN_1655930 | ELL2     | FALSE | FALSE |
| ILMN_1736190 | NA       | FALSE | FALSE |
| ILMN_1664922 | FLNB     | FALSE | TRUE  |
| ILMN_1745570 | KLK7     | FALSE | FALSE |
| ILMN_2090802 | TMEM79   | FALSE | FALSE |
| ILMN_1805466 | SOX9     | FALSE | FALSE |
| ILMN_1803392 | NA       | FALSE | FALSE |
| ILMN_1779252 | TRIM22   | FALSE | FALSE |
| ILMN_2381899 | OPTN     | FALSE | FALSE |
| ILMN_1666893 | TRIML2   | TRUE  | FALSE |
| ILMN_1694075 | GADD45A  | FALSE | TRUE  |
| ILMN_1696911 | FTH1     | FALSE | FALSE |
| ILMN_1721134 | TGM1     | FALSE | FALSE |
| ILMN_2319913 | DGKA     | TRUE  | FALSE |
| ILMN_2317923 | TMEM132A | FALSE | FALSE |
| ILMN_1659215 | CYP4B1   | FALSE | FALSE |
| ILMN_1705750 | TGM2     | TRUE  | TRUE  |
| ILMN_1718731 | KLK5     | FALSE | FALSE |
| ILMN_1736829 | MDM2     | FALSE | FALSE |
| ILMN_1691376 | JAG1     | FALSE | FALSE |
| ILMN_1799848 | ANKRD22  | FALSE | FALSE |
| ILMN_1709870 | HES2     | FALSE | FALSE |
| ILMN_1712522 | CEACAM6  | FALSE | FALSE |
| ILMN_1731215 | MYBPHL   | FALSE | FALSE |
| ILMN_1803277 | MVP      | FALSE | FALSE |
| ILMN_1747451 | PLCXD1   | FALSE | FALSE |
| ILMN_1688780 | S100A4   | FALSE | FALSE |
| ILMN_2060413 | CD24     | FALSE | FALSE |
| ILMN_1769388 | GJB2     | FALSE | FALSE |
| ILMN_1689211 | NA       | FALSE | FALSE |
| ILMN_2363880 | ALDH3B2  | FALSE | FALSE |
| ILMN_1712632 | XDH      | FALSE | FALSE |
| ILMN_1808713 | HSD17B2  | FALSE | TRUE  |
| ILMN_1733998 | DHRS9    | FALSE | FALSE |
| ILMN_1811479 | SPINK6   | FALSE | FALSE |
| ILMN_2052208 | GADD45A  | FALSE | TRUE  |

|              |            |       |       |
|--------------|------------|-------|-------|
| ILMN_1680937 | HIST1H2BC  | FALSE | FALSE |
| ILMN_2061565 | PLCH2      | TRUE  | FALSE |
| ILMN_1796179 | HIST1H2BK  | FALSE | FALSE |
| ILMN_3241554 | KANK4      | FALSE | FALSE |
| ILMN_1743412 | SIAE       | FALSE | FALSE |
| ILMN_3227315 | FTH1       | FALSE | FALSE |
| ILMN_3248032 | NCCRP1     | FALSE | FALSE |
| ILMN_2329927 | ABCG1      | FALSE | FALSE |
| ILMN_1791280 | HSPB8      | FALSE | FALSE |
| ILMN_1657111 | AHNAK2     | TRUE  | FALSE |
| ILMN_1713397 | NCCRP1     | FALSE | FALSE |
| ILMN_1672148 | AKR1B10    | FALSE | FALSE |
| ILMN_2376723 | CDKN2B     | TRUE  | FALSE |
| ILMN_2347798 | IFI6       | FALSE | FALSE |
| ILMN_1743103 | SH3PXD2A   | TRUE  | FALSE |
| ILMN_1667295 | VASN       | TRUE  | FALSE |
| ILMN_1723198 | CDKN2B     | FALSE | FALSE |
| ILMN_1702503 | ALDH3A1    | FALSE | FALSE |
| ILMN_1742410 | BCL2L1     | FALSE | FALSE |
| ILMN_1714592 | CDA        | FALSE | FALSE |
| ILMN_2173291 | CYP4B1     | FALSE | FALSE |
| ILMN_1813314 | HIST1H2BK  | FALSE | FALSE |
| ILMN_1689037 | LIPG       | FALSE | FALSE |
| ILMN_2396875 | IGFBP3     | FALSE | FALSE |
| ILMN_1807206 | DHRS1      | FALSE | FALSE |
| ILMN_2063168 | MALL       | FALSE | FALSE |
| ILMN_1655348 | GPR1       | FALSE | FALSE |
| ILMN_1709307 | GPSM1      | TRUE  | FALSE |
| ILMN_1658706 | ST6GALNAC2 | FALSE | TRUE  |
| ILMN_1717793 | C19orf33   | FALSE | FALSE |
| ILMN_1779034 | NADSYN1    | FALSE | TRUE  |
| ILMN_2197365 | RGS2       | FALSE | TRUE  |
| ILMN_1734276 | PMEPA1     | FALSE | TRUE  |
| ILMN_1663042 | SDC4       | TRUE  | TRUE  |
| ILMN_1758938 | SLC31A2    | FALSE | FALSE |
| ILMN_1785202 | STAT4      | FALSE | FALSE |
| ILMN_1767685 | SERPINB7   | FALSE | FALSE |
| ILMN_1806030 | PPL        | FALSE | FALSE |
| ILMN_2404688 | NUPR1      | FALSE | TRUE  |
| ILMN_2083946 | TGFA       | FALSE | FALSE |
| ILMN_1712545 | S100A3     | FALSE | FALSE |
| ILMN_1805175 | TGFA       | FALSE | FALSE |
| ILMN_1793888 | SERPINB5   | FALSE | FALSE |
| ILMN_1732609 | FAM214B    | TRUE  | FALSE |
| ILMN_1775829 | PERP       | FALSE | FALSE |
| ILMN_1770940 | CDH1       | FALSE | FALSE |

|              |          |       |       |
|--------------|----------|-------|-------|
| ILMN_2353054 | KLK5     | FALSE | FALSE |
| ILMN_2188862 | GDF15    | FALSE | FALSE |
| ILMN_1735700 | KLK8     | FALSE | FALSE |
| ILMN_1661197 | CLCF1    | FALSE | FALSE |
| ILMN_1730454 | FOLR3    | FALSE | FALSE |
| ILMN_1805519 | CD24     | FALSE | FALSE |
| ILMN_2094266 | HES2     | FALSE | FALSE |
| ILMN_2395139 | SERPINB7 | FALSE | FALSE |
| ILMN_1812968 | SOX18    | FALSE | FALSE |
| ILMN_1699989 | BNIP1    | TRUE  | FALSE |
| ILMN_1671703 | ACTA2    | FALSE | FALSE |
| ILMN_2390310 | MIR22HG  | FALSE | FALSE |
| ILMN_1763666 | ALDH3B2  | FALSE | FALSE |
| ILMN_1794782 | ABCG1    | FALSE | FALSE |
| ILMN_1688775 | NA       | FALSE | FALSE |
| ILMN_1865764 | ZMAT3    | TRUE  | FALSE |
| ILMN_1797776 | PRSS23   | FALSE | FALSE |
| ILMN_1711087 | NA       | TRUE  | FALSE |
| ILMN_1739605 | LYPD3    | FALSE | FALSE |
| ILMN_2211018 | SPRR2E   | FALSE | FALSE |
| ILMN_1814305 | SAMD9    | FALSE | FALSE |
| ILMN_2404063 | APP      | TRUE  | FALSE |
| ILMN_1676712 | NA       | FALSE | FALSE |
| ILMN_1735712 | KRT1     | FALSE | FALSE |
| ILMN_1775501 | IL1B     | FALSE | FALSE |
| ILMN_1806607 | SFN      | FALSE | FALSE |
| ILMN_3243156 | AHNAK2   | TRUE  | FALSE |
| ILMN_1791545 | KRT23    | FALSE | FALSE |
| ILMN_1746085 | IGFBP3   | FALSE | FALSE |
| ILMN_2336609 | SYTL2    | FALSE | FALSE |
| ILMN_2148913 | TMEM45A  | FALSE | FALSE |
| ILMN_2412336 | AKR1C2   | FALSE | FALSE |
| ILMN_2149292 | TMEM40   | FALSE | FALSE |
| ILMN_1725852 | S100A2   | FALSE | FALSE |
| ILMN_1763000 | ADAP2    | FALSE | FALSE |
| ILMN_1753342 | SAT1     | FALSE | FALSE |
| ILMN_1651282 | COL17A1  | TRUE  | FALSE |
| ILMN_1687757 | NA       | FALSE | FALSE |
| ILMN_1770085 | BTG2     | TRUE  | FALSE |
| ILMN_1654262 | ZMAT3    | TRUE  | FALSE |
| ILMN_2078592 | ADTRP    | FALSE | FALSE |
| ILMN_1697733 | CST6     | FALSE | FALSE |
| ILMN_1738546 | NA       | FALSE | FALSE |
| ILMN_2404065 | APP      | TRUE  | FALSE |
| ILMN_2191967 | SPRR2D   | FALSE | FALSE |
| ILMN_1772627 | NSG1     | TRUE  | FALSE |

|              |           |       |       |
|--------------|-----------|-------|-------|
| ILMN_1651574 | AQP3      | FALSE | FALSE |
| ILMN_1744212 | INPP5D    | FALSE | FALSE |
| ILMN_1673191 | S100A7A   | FALSE | FALSE |
| ILMN_1665035 | KRT14     | FALSE | FALSE |
| ILMN_1680110 | ADIRF     | TRUE  | FALSE |
| ILMN_1805665 | FLRT3     | TRUE  | FALSE |
| ILMN_1779147 | ENC1      | FALSE | FALSE |
| ILMN_2406035 | LAMA3     | FALSE | FALSE |
| ILMN_1700583 | ZNF750    | TRUE  | FALSE |
| ILMN_1713124 | AKR1C3    | FALSE | FALSE |
| ILMN_2139970 | ALDH1A3   | FALSE | FALSE |
| ILMN_1796423 | CLIC3     | FALSE | FALSE |
| ILMN_1701424 | LAMC2     | FALSE | FALSE |
| ILMN_1712082 | GCNT3     | FALSE | FALSE |
| ILMN_2214197 | TP53INP1  | TRUE  | FALSE |
| ILMN_1654118 | BCL2L1    | FALSE | FALSE |
| ILMN_1770922 | TMEM45A   | FALSE | FALSE |
| ILMN_1797704 | NA        | FALSE | FALSE |
| ILMN_1751120 | HIST1H4H  | FALSE | FALSE |
| ILMN_1727589 | SULT2B1   | FALSE | FALSE |
| ILMN_1666845 | KRT17     | FALSE | FALSE |
| ILMN_1771538 | PSCA      | FALSE | FALSE |
| ILMN_1769759 | SERPINB13 | FALSE | FALSE |
| ILMN_1714108 | TP53INP1  | TRUE  | FALSE |
| ILMN_1658483 | IL1A      | FALSE | FALSE |
| ILMN_1729216 | CRYAB     | FALSE | FALSE |
| ILMN_1774874 | IL1RN     | FALSE | FALSE |
| ILMN_1724686 | CLDN1     | FALSE | FALSE |
| ILMN_1758623 | HIST1H2BD | FALSE | FALSE |
| ILMN_1807439 | ALDH1A3   | FALSE | FALSE |
| ILMN_2121408 | HBEGF     | FALSE | TRUE  |
| ILMN_1686573 | DEFB1     | FALSE | FALSE |
| ILMN_1780255 | KLK6      | FALSE | FALSE |
| ILMN_1692223 | LCN2      | FALSE | FALSE |
| ILMN_3242166 | KRT16     | FALSE | FALSE |
| ILMN_2067656 | CCND2     | FALSE | TRUE  |
| ILMN_1784602 | CDKN1A    | FALSE | FALSE |
| ILMN_1653934 | KRT17     | FALSE | FALSE |
| ILMN_1814270 | LY6D      | FALSE | FALSE |
| ILMN_1792689 | HIST1H2AC | FALSE | FALSE |
| ILMN_1784294 | CPA4      | FALSE | FALSE |
| ILMN_1706483 | C1orf116  | FALSE | FALSE |
| ILMN_1661708 | NA        | FALSE | FALSE |
| ILMN_3243690 | NA        | FALSE | FALSE |
| ILMN_1763011 | SUGCT     | FALSE | FALSE |
| ILMN_1732071 | HIST2H2BE | FALSE | FALSE |

|              |           |       |       |
|--------------|-----------|-------|-------|
| ILMN_3195198 | KRT17     | FALSE | FALSE |
| ILMN_2064860 | NA        | FALSE | FALSE |
| ILMN_1768973 | HIST2H2AC | FALSE | FALSE |
| ILMN_1651496 | HIST1H2BD | TRUE  | FALSE |
| ILMN_1775330 | C15orf52  | FALSE | FALSE |
| ILMN_2058782 | IFI27     | FALSE | FALSE |
| ILMN_2228162 | KRT16     | FALSE | FALSE |
| ILMN_3242900 | NA        | FALSE | FALSE |
| ILMN_1659047 | NA        | FALSE | FALSE |
| ILMN_1715684 | LAMB3     | TRUE  | FALSE |
| ILMN_1658569 | NA        | FALSE | FALSE |
| ILMN_1740938 | APOE      | FALSE | FALSE |
| ILMN_1750748 | KRT16P3   | FALSE | FALSE |
| ILMN_2144426 | NA        | FALSE | FALSE |
| ILMN_1713813 | KRT16P3   | FALSE | FALSE |
| ILMN_1711174 | SPRR1B    | FALSE | FALSE |
| ILMN_1693192 | PI3       | FALSE | TRUE  |
| ILMN_1736760 | KRT16     | FALSE | FALSE |
| ILMN_1721354 | KRT6B     | FALSE | FALSE |

**Supplementary Table S6. Primers and conditions used for qRT-PCR.**

| <b>Gene symbol</b> | <b>Forward Primer (5' to 3')</b> | <b>Reverse Primer (5' to 3')</b> | <b>Reference/Supplier</b>    |
|--------------------|----------------------------------|----------------------------------|------------------------------|
| ATL3               | ACAGCCAGTCAACTGTGAAAG            | CCAGACGACCGTATTCTGTGA            | PrimerBank<br>ID 45827805c1  |
| PA2G4              | ACAGGGTACTTCGGTCCTTG             | ATGGCATCACCTTTCTCACAC            | PrimerBank<br>ID 124494253c2 |
| GAPDH              | TGCACCACCAACTGCTTAGC             | GGCATGGACTGTGGTCATGAG            | Vandesompele et al.<br>[47]  |
| YWHAZ              | ACTTTTGGTACATTGTGGCTTCAA         | CCGCCAGGACAAACCAGTAT             | Vandesompele et al.<br>[47]  |
| RPL13              | CCTGGAGGAGAAGAGGAAAGAGA          | TTGAGGACCTCTGTGTATTTGTCAA        | Vandesompele et al.<br>[47]  |

Conditions used: 95°C for 2min; 40/45 cycles of 95°C for 15sec, 58°C for 20sec, 72°C for 15sec, 76°C for 5sec and read; final extension 78°C for 8min; followed by melting curve analysis from 65°C to 90°C to confirm product-specific amplification.

**Supplementary Table S7. Antibodies used for western blotting.**

| <b>Antibody</b>             | <b>Manufacturer</b> | <b>Band size (kD)</b> | <b>Dilution used</b> |
|-----------------------------|---------------------|-----------------------|----------------------|
| Rabbit anti-ATL3            | ABGENT              | 59                    | 1:2000               |
| Rabbit anti-PA2G4           | GeneTex             | 48                    | 1:20000              |
| Mouse anti- $\beta$ -actin  | Thermo Scientific   | 42                    | 1:150000             |
| Polyclonal goat anti-rabbit | Dako                |                       | 1:1000               |
| Polyclonal goat anti-mouse  | Dako                |                       | 1:1000               |
